# Supplementary material for: Study on the Control Strategy of Shifting Time Involving Multigroup Clutches
Source: Hindawi journal article supplement (doi:10.1155/2016/9523251), 2016-01-01
Supplement: f1 [file 9523251.f1.pdf]

|          |         |          |         |          |         |          |         |          |
|----------|---------|----------|---------|----------|---------|----------|---------|----------|
| L6:9.00s |         | L6:9.00s |         | L6:9.00s |         | L6:9.00s |         | L6:9.00s |
| L7:9.00s |         | L7:9.10s |         | L7:9.20s |         | L7:9.30s |         | L7:9.40s |
| t        | J3.om   | t        | J3.om   | t        | J3.om   | t        | J3.om   | t        |
| s        | rpm     | s        | rpm     | s        | rpm     | s        | rpm     | s        |
| 0        | 1152.51 | 0        | 1152.51 | 0        | 1152.51 | 0        | 1152.51 | 0        |
| 0.006678 | 1152.51 | 0.006678 | 1152.51 | 0.006678 | 1152.51 | 0.006678 | 1152.51 | 0.006678 |
| 0.01     | 1152.51 | 0.01     | 1152.51 | 0.01     | 1152.51 | 0.01     | 1152.51 | 0.01     |
| 0.016678 | 1152.51 | 0.016678 | 1152.51 | 0.016678 | 1152.51 | 0.016678 | 1152.51 | 0.016678 |
| 0.02     | 1152.51 | 0.02     | 1152.51 | 0.02     | 1152.51 | 0.02     | 1152.51 | 0.02     |
| 0.026678 | 1152.51 | 0.026678 | 1152.51 | 0.026678 | 1152.51 | 0.026678 | 1152.51 | 0.026678 |
| 0.03     | 1152.51 | 0.03     | 1152.51 | 0.03     | 1152.51 | 0.03     | 1152.51 | 0.03     |
| 0.036678 | 1152.51 | 0.036678 | 1152.51 | 0.036678 | 1152.51 | 0.036678 | 1152.51 | 0.036678 |
| 0.04     | 1152.51 | 0.04     | 1152.51 | 0.04     | 1152.51 | 0.04     | 1152.51 | 0.04     |
| 0.046678 | 1152.51 | 0.046678 | 1152.51 | 0.046678 | 1152.51 | 0.046678 | 1152.51 | 0.046678 |
| 0.05     | 1152.51 | 0.05     | 1152.51 | 0.05     | 1152.51 | 0.05     | 1152.51 | 0.05     |
| 0.056678 | 1152.51 | 0.056678 | 1152.51 | 0.056678 | 1152.51 | 0.056678 | 1152.51 | 0.056678 |
| 0.06     | 1152.51 | 0.06     | 1152.51 | 0.06     | 1152.51 | 0.06     | 1152.51 | 0.06     |
| 0.066678 | 1152.51 | 0.066678 | 1152.51 | 0.066678 | 1152.51 | 0.066678 | 1152.51 | 0.066678 |
| 0.07     | 1152.51 | 0.07     | 1152.51 | 0.07     | 1152.51 | 0.07     | 1152.51 | 0.07     |
| 0.076678 | 1152.51 | 0.076678 | 1152.51 | 0.076678 | 1152.51 | 0.076678 | 1152.51 | 0.076678 |
| 0.08     | 1152.51 | 0.08     | 1152.51 | 0.08     | 1152.51 | 0.08     | 1152.51 | 0.08     |
| 0.086678 | 1152.51 | 0.086678 | 1152.51 | 0.086678 | 1152.51 | 0.086678 | 1152.51 | 0.086678 |
| 0.09     | 1152.51 | 0.09     | 1152.51 | 0.09     | 1152.51 | 0.09     | 1152.51 | 0.09     |
| 0.096678 | 1152.51 | 0.096678 | 1152.51 | 0.096678 | 1152.51 | 0.096678 | 1152.51 | 0.096678 |
| 0.1      | 1152.51 | 0.1      | 1152.51 | 0.1      | 1152.51 | 0.1      | 1152.51 | 0.1      |
| 0.106678 | 1152.51 | 0.106678 | 1152.51 | 0.106678 | 1152.51 | 0.106678 | 1152.51 | 0.106678 |
| 0.11     | 1152.51 | 0.11     | 1152.51 | 0.11     | 1152.51 | 0.11     | 1152.51 | 0.11     |
| 0.116678 | 1152.51 | 0.116678 | 1152.51 | 0.116678 | 1152.51 | 0.116678 | 1152.51 | 0.116678 |
| 0.12     | 1152.51 | 0.12     | 1152.51 | 0.12     | 1152.51 | 0.12     | 1152.51 | 0.12     |
| 0.126678 | 1152.51 | 0.126678 | 1152.51 | 0.126678 | 1152.51 | 0.126678 | 1152.51 | 0.126678 |
| 0.13     | 1152.51 | 0.13     | 1152.51 | 0.13     | 1152.51 | 0.13     | 1152.51 | 0.13     |
| 0.136678 | 1152.51 | 0.136678 | 1152.51 | 0.136678 | 1152.51 | 0.136678 | 1152.51 | 0.136678 |
| 0.14     | 1152.51 | 0.14     | 1152.51 | 0.14     | 1152.51 | 0.14     | 1152.51 | 0.14     |
| 0.146678 | 1152.51 | 0.146678 | 1152.51 | 0.146678 | 1152.51 | 0.146678 | 1152.51 | 0.146678 |
| 0.15     | 1152.51 | 0.15     | 1152.51 | 0.15     | 1152.51 | 0.15     | 1152.51 | 0.15     |
| 0.156678 | 1152.51 | 0.156678 | 1152.51 | 0.156678 | 1152.51 | 0.156678 | 1152.51 | 0.156678 |
| 0.16     | 1152.51 | 0.16     | 1152.51 | 0.16     | 1152.51 | 0.16     | 1152.51 | 0.16     |
| 0.166678 | 1152.51 | 0.166678 | 1152.51 | 0.166678 | 1152.51 | 0.166678 | 1152.51 | 0.166678 |
| 0.17     | 1152.51 | 0.17     | 1152.51 | 0.17     | 1152.51 | 0.17     | 1152.51 | 0.17     |
| 0.176678 | 1152.51 | 0.176678 | 1152.51 | 0.176678 | 1152.51 | 0.176678 | 1152.51 | 0.176678 |
| 0.18     | 1152.51 | 0.18     | 1152.51 | 0.18     | 1152.51 | 0.18     | 1152.51 | 0.18     |
| 0.186678 | 1152.51 | 0.186678 | 1152.51 | 0.186678 | 1152.51 | 0.186678 | 1152.51 | 0.186678 |
| 0.19     | 1152.51 | 0.19     | 1152.51 | 0.19     | 1152.51 | 0.19     | 1152.51 | 0.19     |
| 0.196678 | 1152.51 | 0.196678 | 1152.51 | 0.196678 | 1152.51 | 0.196678 | 1152.51 | 0.196678 |
| 0.2      | 1152.51 | 0.2      | 1152.51 | 0.2      | 1152.51 | 0.2      | 1152.51 | 0.2      |
| 0.206678 | 1152.51 | 0.206678 | 1152.51 | 0.206678 | 1152.51 | 0.206678 | 1152.51 | 0.206678 |
| 0.21     | 1152.51 | 0.21     | 1152.51 | 0.21     | 1152.51 | 0.21     | 1152.51 | 0.21     |

|          |         |          |         |          |         |          |         |          |
|----------|---------|----------|---------|----------|---------|----------|---------|----------|
| 0.216678 | 1152.51 | 0.216678 | 1152.51 | 0.216678 | 1152.51 | 0.216678 | 1152.51 | 0.216678 |
| 0.22     | 1152.51 | 0.22     | 1152.51 | 0.22     | 1152.51 | 0.22     | 1152.51 | 0.22     |
| 0.226678 | 1152.51 | 0.226678 | 1152.51 | 0.226678 | 1152.51 | 0.226678 | 1152.51 | 0.226678 |
| 0.23     | 1152.51 | 0.23     | 1152.51 | 0.23     | 1152.51 | 0.23     | 1152.51 | 0.23     |
| 0.236678 | 1152.51 | 0.236678 | 1152.51 | 0.236678 | 1152.51 | 0.236678 | 1152.51 | 0.236678 |
| 0.24     | 1152.51 | 0.24     | 1152.51 | 0.24     | 1152.51 | 0.24     | 1152.51 | 0.24     |
| 0.246678 | 1152.51 | 0.246678 | 1152.51 | 0.246678 | 1152.51 | 0.246678 | 1152.51 | 0.246678 |
| 0.25     | 1152.51 | 0.25     | 1152.51 | 0.25     | 1152.51 | 0.25     | 1152.51 | 0.25     |
| 0.256678 | 1152.51 | 0.256678 | 1152.51 | 0.256678 | 1152.51 | 0.256678 | 1152.51 | 0.256678 |
| 0.26     | 1152.51 | 0.26     | 1152.51 | 0.26     | 1152.51 | 0.26     | 1152.51 | 0.26     |
| 0.266678 | 1152.51 | 0.266678 | 1152.51 | 0.266678 | 1152.51 | 0.266678 | 1152.51 | 0.266678 |
| 0.27     | 1152.51 | 0.27     | 1152.51 | 0.27     | 1152.51 | 0.27     | 1152.51 | 0.27     |
| 0.276678 | 1152.51 | 0.276678 | 1152.51 | 0.276678 | 1152.51 | 0.276678 | 1152.51 | 0.276678 |
| 0.28     | 1152.51 | 0.28     | 1152.51 | 0.28     | 1152.51 | 0.28     | 1152.51 | 0.28     |
| 0.286678 | 1152.51 | 0.286678 | 1152.51 | 0.286678 | 1152.51 | 0.286678 | 1152.51 | 0.286678 |
| 0.29     | 1152.51 | 0.29     | 1152.51 | 0.29     | 1152.51 | 0.29     | 1152.51 | 0.29     |
| 0.296678 | 1152.51 | 0.296678 | 1152.51 | 0.296678 | 1152.51 | 0.296678 | 1152.51 | 0.296678 |
| 0.3      | 1152.51 | 0.3      | 1152.51 | 0.3      | 1152.51 | 0.3      | 1152.51 | 0.3      |
| 0.306678 | 1152.51 | 0.306678 | 1152.51 | 0.306678 | 1152.51 | 0.306678 | 1152.51 | 0.306678 |
| 0.31     | 1152.51 | 0.31     | 1152.51 | 0.31     | 1152.51 | 0.31     | 1152.51 | 0.31     |
| 0.316678 | 1152.51 | 0.316678 | 1152.51 | 0.316678 | 1152.51 | 0.316678 | 1152.51 | 0.316678 |
| 0.32     | 1152.51 | 0.32     | 1152.51 | 0.32     | 1152.51 | 0.32     | 1152.51 | 0.32     |
| 0.326678 | 1152.51 | 0.326678 | 1152.51 | 0.326678 | 1152.51 | 0.326678 | 1152.51 | 0.326678 |
| 0.33     | 1152.51 | 0.33     | 1152.51 | 0.33     | 1152.51 | 0.33     | 1152.51 | 0.33     |
| 0.336678 | 1152.51 | 0.336678 | 1152.51 | 0.336678 | 1152.51 | 0.336678 | 1152.51 | 0.336678 |
| 0.34     | 1152.51 | 0.34     | 1152.51 | 0.34     | 1152.51 | 0.34     | 1152.51 | 0.34     |
| 0.346678 | 1152.51 | 0.346678 | 1152.51 | 0.346678 | 1152.51 | 0.346678 | 1152.51 | 0.346678 |
| 0.35     | 1152.51 | 0.35     | 1152.51 | 0.35     | 1152.51 | 0.35     | 1152.51 | 0.35     |
| 0.356678 | 1152.51 | 0.356678 | 1152.51 | 0.356678 | 1152.51 | 0.356678 | 1152.51 | 0.356678 |
| 0.36     | 1152.51 | 0.36     | 1152.51 | 0.36     | 1152.51 | 0.36     | 1152.51 | 0.36     |
| 0.366678 | 1152.51 | 0.366678 | 1152.51 | 0.366678 | 1152.51 | 0.366678 | 1152.51 | 0.366678 |
| 0.37     | 1152.51 | 0.37     | 1152.51 | 0.37     | 1152.51 | 0.37     | 1152.51 | 0.37     |
| 0.376678 | 1152.51 | 0.376678 | 1152.51 | 0.376678 | 1152.51 | 0.376678 | 1152.51 | 0.376678 |
| 0.38     | 1152.51 | 0.38     | 1152.51 | 0.38     | 1152.51 | 0.38     | 1152.51 | 0.38     |
| 0.386678 | 1152.51 | 0.386678 | 1152.51 | 0.386678 | 1152.51 | 0.386678 | 1152.51 | 0.386678 |
| 0.39     | 1152.51 | 0.39     | 1152.51 | 0.39     | 1152.51 | 0.39     | 1152.51 | 0.39     |
| 0.396678 | 1152.51 | 0.396678 | 1152.51 | 0.396678 | 1152.51 | 0.396678 | 1152.51 | 0.396678 |
| 0.4      | 1152.51 | 0.4      | 1152.51 | 0.4      | 1152.51 | 0.4      | 1152.51 | 0.4      |
| 0.406678 | 1152.51 | 0.406678 | 1152.51 | 0.406678 | 1152.51 | 0.406678 | 1152.51 | 0.406678 |
| 0.41     | 1152.51 | 0.41     | 1152.51 | 0.41     | 1152.51 | 0.41     | 1152.51 | 0.41     |
| 0.416678 | 1152.51 | 0.416678 | 1152.51 | 0.416678 | 1152.51 | 0.416678 | 1152.51 | 0.416678 |
| 0.42     | 1152.51 | 0.42     | 1152.51 | 0.42     | 1152.51 | 0.42     | 1152.51 | 0.42     |
| 0.426678 | 1152.51 | 0.426678 | 1152.51 | 0.426678 | 1152.51 | 0.426678 | 1152.51 | 0.426678 |
| 0.43     | 1152.51 | 0.43     | 1152.51 | 0.43     | 1152.51 | 0.43     | 1152.51 | 0.43     |
| 0.436678 | 1152.51 | 0.436678 | 1152.51 | 0.436678 | 1152.51 | 0.436678 | 1152.51 | 0.436678 |
| 0.44     | 1152.51 | 0.44     | 1152.51 | 0.44     | 1152.51 | 0.44     | 1152.51 | 0.44     |
| 0.446678 | 1152.51 | 0.446678 | 1152.51 | 0.446678 | 1152.51 | 0.446678 | 1152.51 | 0.446678 |

|          |         |          |         |          |         |          |         |          |
|----------|---------|----------|---------|----------|---------|----------|---------|----------|
| 0.45     | 1152.51 | 0.45     | 1152.51 | 0.45     | 1152.51 | 0.45     | 1152.51 | 0.45     |
| 0.456678 | 1152.51 | 0.456678 | 1152.51 | 0.456678 | 1152.51 | 0.456678 | 1152.51 | 0.456678 |
| 0.46     | 1152.51 | 0.46     | 1152.51 | 0.46     | 1152.51 | 0.46     | 1152.51 | 0.46     |
| 0.466678 | 1152.51 | 0.466678 | 1152.51 | 0.466678 | 1152.51 | 0.466678 | 1152.51 | 0.466678 |
| 0.47     | 1152.51 | 0.47     | 1152.51 | 0.47     | 1152.51 | 0.47     | 1152.51 | 0.47     |
| 0.476678 | 1152.51 | 0.476678 | 1152.51 | 0.476678 | 1152.51 | 0.476678 | 1152.51 | 0.476678 |
| 0.48     | 1152.51 | 0.48     | 1152.51 | 0.48     | 1152.51 | 0.48     | 1152.51 | 0.48     |
| 0.486678 | 1152.51 | 0.486678 | 1152.51 | 0.486678 | 1152.51 | 0.486678 | 1152.51 | 0.486678 |
| 0.49     | 1152.51 | 0.49     | 1152.51 | 0.49     | 1152.51 | 0.49     | 1152.51 | 0.49     |
| 0.496678 | 1152.51 | 0.496678 | 1152.51 | 0.496678 | 1152.51 | 0.496678 | 1152.51 | 0.496678 |
| 0.5      | 1152.51 | 0.5      | 1152.51 | 0.5      | 1152.51 | 0.5      | 1152.51 | 0.5      |
| 0.506678 | 1152.51 | 0.506678 | 1152.51 | 0.506678 | 1152.51 | 0.506678 | 1152.51 | 0.506678 |
| 0.51     | 1152.51 | 0.51     | 1152.51 | 0.51     | 1152.51 | 0.51     | 1152.51 | 0.51     |
| 0.516678 | 1152.51 | 0.516678 | 1152.51 | 0.516678 | 1152.51 | 0.516678 | 1152.51 | 0.516678 |
| 0.52     | 1152.51 | 0.52     | 1152.51 | 0.52     | 1152.51 | 0.52     | 1152.51 | 0.52     |
| 0.526678 | 1152.51 | 0.526678 | 1152.51 | 0.526678 | 1152.51 | 0.526678 | 1152.51 | 0.526678 |
| 0.53     | 1152.51 | 0.53     | 1152.51 | 0.53     | 1152.51 | 0.53     | 1152.51 | 0.53     |
| 0.536678 | 1152.51 | 0.536678 | 1152.51 | 0.536678 | 1152.51 | 0.536678 | 1152.51 | 0.536678 |
| 0.54     | 1152.51 | 0.54     | 1152.51 | 0.54     | 1152.51 | 0.54     | 1152.51 | 0.54     |
| 0.546678 | 1152.51 | 0.546678 | 1152.51 | 0.546678 | 1152.51 | 0.546678 | 1152.51 | 0.546678 |
| 0.55     | 1152.51 | 0.55     | 1152.51 | 0.55     | 1152.51 | 0.55     | 1152.51 | 0.55     |
| 0.556678 | 1152.51 | 0.556678 | 1152.51 | 0.556678 | 1152.51 | 0.556678 | 1152.51 | 0.556678 |
| 0.56     | 1152.51 | 0.56     | 1152.51 | 0.56     | 1152.51 | 0.56     | 1152.51 | 0.56     |
| 0.566678 | 1152.51 | 0.566678 | 1152.51 | 0.566678 | 1152.51 | 0.566678 | 1152.51 | 0.566678 |
| 0.57     | 1152.51 | 0.57     | 1152.51 | 0.57     | 1152.51 | 0.57     | 1152.51 | 0.57     |
| 0.576678 | 1152.51 | 0.576678 | 1152.51 | 0.576678 | 1152.51 | 0.576678 | 1152.51 | 0.576678 |
| 0.58     | 1152.51 | 0.58     | 1152.51 | 0.58     | 1152.51 | 0.58     | 1152.51 | 0.58     |
| 0.586678 | 1152.51 | 0.586678 | 1152.51 | 0.586678 | 1152.51 | 0.586678 | 1152.51 | 0.586678 |
| 0.59     | 1152.51 | 0.59     | 1152.51 | 0.59     | 1152.51 | 0.59     | 1152.51 | 0.59     |
| 0.596678 | 1152.51 | 0.596678 | 1152.51 | 0.596678 | 1152.51 | 0.596678 | 1152.51 | 0.596678 |
| 0.6      | 1152.51 | 0.6      | 1152.51 | 0.6      | 1152.51 | 0.6      | 1152.51 | 0.6      |
| 0.606678 | 1152.51 | 0.606678 | 1152.51 | 0.606678 | 1152.51 | 0.606678 | 1152.51 | 0.606678 |
| 0.61     | 1152.51 | 0.61     | 1152.51 | 0.61     | 1152.51 | 0.61     | 1152.51 | 0.61     |
| 0.616678 | 1152.51 | 0.616678 | 1152.51 | 0.616678 | 1152.51 | 0.616678 | 1152.51 | 0.616678 |
| 0.62     | 1152.51 | 0.62     | 1152.51 | 0.62     | 1152.51 | 0.62     | 1152.51 | 0.62     |
| 0.626678 | 1152.51 | 0.626678 | 1152.51 | 0.626678 | 1152.51 | 0.626678 | 1152.51 | 0.626678 |
| 0.63     | 1152.51 | 0.63     | 1152.51 | 0.63     | 1152.51 | 0.63     | 1152.51 | 0.63     |
| 0.636678 | 1152.51 | 0.636678 | 1152.51 | 0.636678 | 1152.51 | 0.636678 | 1152.51 | 0.636678 |
| 0.64     | 1152.51 | 0.64     | 1152    |          |         |          |         |          |

|          |         |          |         |          |         |          |         |          |
|----------|---------|----------|---------|----------|---------|----------|---------|----------|
| 0.686678 | 1152.51 | 0.686678 | 1152.51 | 0.686678 | 1152.51 | 0.686678 | 1152.51 | 0.686678 |
| 0.69     | 1152.51 | 0.69     | 1152.51 | 0.69     | 1152.51 | 0.69     | 1152.51 | 0.69     |
| 0.696678 | 1152.51 | 0.696678 | 1152.51 | 0.696678 | 1152.51 | 0.696678 | 1152.51 | 0.696678 |
| 0.7      | 1152.51 | 0.7      | 1152.51 | 0.7      | 1152.51 | 0.7      | 1152.51 | 0.7      |
| 0.706678 | 1152.51 | 0.706678 | 1152.51 | 0.706678 | 1152.51 | 0.706678 | 1152.51 | 0.706678 |
| 0.71     | 1152.51 | 0.71     | 1152.51 | 0.71     | 1152.51 | 0.71     | 1152.51 | 0.71     |
| 0.716678 | 1152.51 | 0.716678 | 1152.51 | 0.716678 | 1152.51 | 0.716678 | 1152.51 | 0.716678 |
| 0.72     | 1152.51 | 0.72     | 1152.51 | 0.72     | 1152.51 | 0.72     | 1152.51 | 0.72     |
| 0.726678 | 1152.51 | 0.726678 | 1152.51 | 0.726678 | 1152.51 | 0.726678 | 1152.51 | 0.726678 |
| 0.73     | 1152.51 | 0.73     | 1152.51 | 0.73     | 1152.51 | 0.73     | 1152.51 | 0.73     |
| 0.736678 | 1152.51 | 0.736678 | 1152.51 | 0.736678 | 1152.51 | 0.736678 | 1152.51 | 0.736678 |
| 0.74     | 1152.51 | 0.74     | 1152.51 | 0.74     | 1152.51 | 0.74     | 1152.51 | 0.74     |
| 0.746678 | 1152.51 | 0.746678 | 1152.51 | 0.746678 | 1152.51 | 0.746678 | 1152.51 | 0.746678 |
| 0.75     | 1152.51 | 0.75     | 1152.51 | 0.75     | 1152.51 | 0.75     | 1152.51 | 0.75     |
| 0.756678 | 1152.51 | 0.756678 | 1152.51 | 0.756678 | 1152.51 | 0.756678 | 1152.51 | 0.756678 |
| 0.76     | 1152.51 | 0.76     | 1152.51 | 0.76     | 1152.51 | 0.76     | 1152.51 | 0.76     |
| 0.766678 | 1152.51 | 0.766678 | 1152.51 | 0.766678 | 1152.51 | 0.766678 | 1152.51 | 0.766678 |
| 0.77     | 1152.51 | 0.77     | 1152.51 | 0.77     | 1152.51 | 0.77     | 1152.51 | 0.77     |
| 0.776678 | 1152.51 | 0.776678 | 1152.51 | 0.776678 | 1152.51 | 0.776678 | 1152.51 | 0.776678 |
| 0.78     | 1152.51 | 0.78     | 1152.51 | 0.78     | 1152.51 | 0.78     | 1152.51 | 0.78     |
| 0.786678 | 1152.51 | 0.786678 | 1152.51 | 0.786678 | 1152.51 | 0.786678 | 1152.51 | 0.786678 |
| 0.79     | 1152.51 | 0.79     | 1152.51 | 0.79     | 1152.51 | 0.79     | 1152.51 | 0.79     |
| 0.796678 | 1152.51 | 0.796678 | 1152.51 | 0.796678 | 1152.51 | 0.796678 | 1152.51 | 0.796678 |
| 0.8      | 1152.51 | 0.8      | 1152.51 | 0.8      | 1152.51 | 0.8      | 1152.51 | 0.8      |
| 0.806678 | 1152.51 | 0.806678 | 1152.51 | 0.806678 | 1152.51 | 0.806678 | 1152.51 | 0.806678 |
| 0.81     | 1152.51 | 0.81     | 1152.51 | 0.81     | 1152.51 | 0.81     | 1152.51 | 0.81     |
| 0.816678 | 1152.51 | 0.816678 | 1152.51 | 0.816678 | 1152.51 | 0.816678 | 1152.51 | 0.816678 |
| 0.82     | 1152.51 | 0.82     | 1152.51 | 0.82     | 1152.51 | 0.82     | 1152.51 | 0.82     |
| 0.826678 | 1152.51 | 0.826678 | 1152.51 | 0.826678 | 1152.51 | 0.826678 | 1152.51 | 0.826678 |
| 0.83     | 1152.51 | 0.83     | 1152.51 | 0.83     | 1152.51 | 0.83     | 1152.51 | 0.83     |
| 0.836678 | 1152.51 | 0.836678 | 1152.51 | 0.836678 | 1152.51 | 0.836678 | 1152.51 | 0.836678 |
| 0.84     | 1152.51 | 0.84     | 1152.51 | 0.84     | 1152.51 | 0.84     | 1152.51 | 0.84     |
| 0.846678 | 1152.51 | 0.846678 | 1152.51 | 0.846678 | 1152.51 | 0.846678 | 1152.51 | 0.846678 |
| 0.85     | 1152.51 | 0.85     | 1152.51 | 0.85     | 1152.51 | 0.85     | 1152.51 | 0.85     |
| 0.856678 | 1152.51 | 0.856678 | 1152.51 | 0.856678 | 1152.51 | 0.856678 | 1152.51 | 0.856678 |
| 0.86     | 1152.51 | 0.86     | 1152.51 | 0.86     | 1152.51 | 0.86     | 1152.51 | 0.86     |
| 0.866678 | 1152.51 | 0.866678 | 1152.51 | 0.866678 | 1152.51 | 0.866678 | 1152.51 | 0.866678 |
| 0.87     | 1152.51 | 0.87     | 1152.51 | 0.87     | 1152.51 | 0.87     | 1152.51 | 0.87     |
| 0.876678 | 1152.51 | 0.876678 | 1152.51 | 0.876678 | 1152.51 | 0.876678 | 1152.51 | 0.876678 |
| 0.88     | 1152.51 | 0.88     | 1152.51 | 0.88     | 1152.51 | 0.88     | 1152.51 | 0.88     |
| 0.886678 | 1152.51 | 0.886678 | 1152.51 | 0.886678 | 1152.51 | 0.886678 | 1152.51 | 0.886678 |
| 0.89     | 1152.51 | 0.89     | 1152.51 | 0.89     | 1152.51 | 0.89     | 1152.51 | 0.89     |
| 0.896678 | 1152.51 | 0.896678 | 1152.51 | 0.896678 | 1152.51 | 0.896678 | 1152.51 | 0.896678 |
| 0.9      | 1152.51 | 0.9      | 1152.51 | 0.9      | 1152.51 | 0.9      | 1152.51 | 0.9      |
| 0.906678 | 1152.51 | 0.906678 | 1152.51 | 0.906678 | 1152.51 | 0.906678 | 1152.51 | 0.906678 |
| 0.91     | 1152.51 | 0.91     | 1152.51 | 0.91     | 1152.51 | 0.91     | 1152.51 | 0.91     |
| 0.916678 | 1152.51 | 0.916678 | 1152.51 | 0.916678 | 1152.51 | 0.916678 | 1152.51 | 0.916678 |



|          |         |          |         |          |         |          |         |          |
|----------|---------|----------|---------|----------|---------|----------|---------|----------|
| 0.92     | 1152.51 | 0.92     | 1152.51 | 0.92     | 1152.51 | 0.92     | 1152.51 | 0.92     |
| 0.926678 | 1152.51 | 0.926678 | 1152.51 | 0.926678 | 1152.51 | 0.926678 | 1152.51 | 0.926678 |
| 0.93     | 1152.51 | 0.93     | 1152.51 | 0.93     | 1152.51 | 0.93     | 1152.51 | 0.93     |
| 0.936678 | 1152.51 | 0.936678 | 1152.51 | 0.936678 | 1152.51 | 0.936678 | 1152.51 | 0.936678 |
| 0.94     | 1152.51 | 0.94     | 1152.51 | 0.94     | 1152.51 | 0.94     | 1152.51 | 0.94     |
| 0.946678 | 1152.51 | 0.946678 | 1152.51 | 0.946678 | 1152.51 | 0.946678 | 1152.51 | 0.946678 |
| 0.95     | 1152.51 | 0.95     | 1152.51 | 0.95     | 1152.51 | 0.95     | 1152.51 | 0.95     |
| 0.956678 | 1152.51 | 0.956678 | 1152.51 | 0.956678 | 1152.51 | 0.956678 | 1152.51 | 0.956678 |
| 0.96     | 1152.51 | 0.96     | 1152.51 | 0.96     | 1152.51 | 0.96     | 1152.51 | 0.96     |
| 0.966678 | 1152.51 | 0.966678 | 1152.51 | 0.966678 | 1152.51 | 0.966678 | 1152.51 | 0.966678 |
| 0.97     | 1152.51 | 0.97     | 1152.51 | 0.97     | 1152.51 | 0.97     | 1152.51 | 0.97     |
| 0.976678 | 1152.51 | 0.976678 | 1152.51 | 0.976678 | 1152.51 | 0.976678 | 1152.51 | 0.976678 |
| 0.98     | 1152.51 | 0.98     | 1152.51 | 0.98     | 1152.51 | 0.98     | 1152.51 | 0.98     |
| 0.986678 | 1152.51 | 0.986678 | 1152.51 | 0.986678 | 1152.51 | 0.986678 | 1152.51 | 0.986678 |
| 0.99     | 1152.51 | 0.99     | 1152.51 | 0.99     | 1152.51 | 0.99     | 1152.51 | 0.99     |
| 0.996678 | 1152.51 | 0.996678 | 1152.51 | 0.996678 | 1152.51 | 0.996678 | 1152.51 | 0.996678 |
| 1        | 1152.51 | 1        | 1152.51 | 1        | 1152.51 | 1        | 1152.51 | 1        |
| 1.006678 | 1152.51 | 1.006678 | 1152.51 | 1.006678 | 1152.51 | 1.006678 | 1152.51 | 1.006678 |
| 1.01     | 1152.51 | 1.01     | 1152.51 | 1.01     | 1152.51 | 1.01     | 1152.51 | 1.01     |
| 1.016678 | 1152.51 | 1.016678 | 1152.51 | 1.016678 | 1152.51 | 1.016678 | 1152.51 | 1.016678 |
| 1.02     | 1152.51 | 1.02     | 1152.51 | 1.02     | 1152.51 | 1.02     | 1152.51 | 1.02     |
| 1.026678 | 1152.51 | 1.026678 | 1152.51 | 1.026678 | 1152.51 | 1.026678 | 1152.51 | 1.026678 |
| 1.03     | 1152.51 | 1.03     | 1152.51 | 1.03     | 1152.51 | 1.03     | 1152.51 | 1.03     |
| 1.036678 | 1152.51 | 1.036678 | 1152.51 | 1.036678 | 1152.51 | 1.036678 | 1152.51 | 1.036678 |
| 1.04     | 1152.51 | 1.04     | 1152.51 | 1.04     | 1152.51 | 1.04     | 1152.51 | 1.04     |
| 1.046678 | 1152.51 | 1.046678 | 1152.51 | 1.046678 | 1152.51 | 1.046678 | 1152.51 | 1.046678 |
| 1.05     | 1152.51 | 1.05     | 1152.51 | 1.05     | 1152.51 | 1.05     | 1152.51 | 1.05     |
| 1.056678 | 1152.51 | 1.056678 | 1152.51 | 1.056678 | 1152.51 | 1.056678 | 1152.51 | 1.056678 |
| 1.06     | 1152.51 | 1.06     | 1152.51 | 1.06     | 1152.51 | 1.06     | 1152.51 | 1.06     |
| 1.066678 | 1152.51 | 1.066678 | 1152.51 | 1.066678 | 1152.51 | 1.066678 | 1152.51 | 1.066678 |
| 1.07     | 1152.51 | 1.07     | 1152.51 | 1.07     | 1152.51 | 1.07     | 1152.51 | 1.07     |
| 1.076678 | 1152.51 | 1.076678 | 1152.51 | 1.076678 | 1152.51 | 1.076678 | 1152.51 | 1.076678 |
| 1.08     | 1152.51 | 1.08     | 1152.51 | 1.08     | 1152.51 | 1.08     | 1152.51 | 1.08     |
| 1.086678 | 1152.51 | 1.086678 | 1152.51 | 1.086678 | 1152.51 | 1.086678 | 1152.51 | 1.086678 |
| 1.09     | 1152.51 | 1.09     | 1152.51 | 1.09     | 1152.51 | 1.09     | 1152.51 | 1.09     |
| 1.096678 | 1152.51 | 1.096678 | 1152.51 | 1.096678 | 1152.51 | 1.096678 | 1152.51 | 1.096678 |
| 1.1      | 1152.51 | 1.1      | 1152.51 | 1.1      | 1152.51 | 1.1      | 1152.51 | 1.1      |
| 1.106678 | 1152.51 | 1.106678 | 1152.51 | 1.106678 | 1152.51 | 1.106678 | 1152.51 | 1.106678 |
| 1.11     | 1152.51 | 1.11     | 1152.51 | 1.11     | 1152.51 | 1.11     | 1152.51 | 1.11     |
| 1.116678 | 1152.51 | 1.116678 | 1152.51 | 1.116678 | 1152.51 | 1.116678 | 1152.51 | 1.116678 |
| 1.12     | 1152.51 | 1.12     | 1152.51 | 1.12     | 1152.51 | 1.12     | 1152.51 | 1.12     |
| 1.126678 | 1152.51 | 1.126678 | 1152.51 | 1.126678 | 1152.51 | 1.126678 | 1152.51 | 1.126678 |
| 1.13     | 1152.51 | 1.13     | 1152.51 | 1.13     | 1152.51 | 1.13     | 1152.51 | 1.13     |
| 1.136678 | 1152.51 | 1.136678 | 1152.51 | 1.136678 | 1152.51 | 1.136678 | 1152.51 | 1.136678 |
| 1.14     | 1152.51 | 1.14     | 1152.51 | 1.14     | 1152.51 | 1.14     | 1152.51 | 1.14     |
| 1.146678 | 1152.51 | 1.146678 | 1152.51 | 1.146678 | 1152.51 | 1.146678 | 1152.51 | 1.146678 |
| 1.15     | 1152.51 | 1.15     | 1152.51 | 1.15     | 1152.51 | 1.15     | 1152.51 | 1.15     |

|          |         |          |         |          |         |          |         |          |
|----------|---------|----------|---------|----------|---------|----------|---------|----------|
| 1.156678 | 1152.51 | 1.156678 | 1152.51 | 1.156678 | 1152.51 | 1.156678 | 1152.51 | 1.156678 |
| 1.16     | 1152.51 | 1.16     | 1152.51 | 1.16     | 1152.51 | 1.16     | 1152.51 | 1.16     |
| 1.166678 | 1152.51 | 1.166678 | 1152.51 | 1.166678 | 1152.51 | 1.166678 | 1152.51 | 1.166678 |
| 1.17     | 1152.51 | 1.17     | 1152.51 | 1.17     | 1152.51 | 1.17     | 1152.51 | 1.17     |
| 1.176678 | 1152.51 | 1.176678 | 1152.51 | 1.176678 | 1152.51 | 1.176678 | 1152.51 | 1.176678 |
| 1.18     | 1152.51 | 1.18     | 1152.51 | 1.18     | 1152.51 | 1.18     | 1152.51 | 1.18     |
| 1.186678 | 1152.51 | 1.186678 | 1152.51 | 1.186678 | 1152.51 | 1.186678 | 1152.51 | 1.186678 |
| 1.19     | 1152.51 | 1.19     | 1152.51 | 1.19     | 1152.51 | 1.19     | 1152.51 | 1.19     |
| 1.196678 | 1152.51 | 1.196678 | 1152.51 | 1.196678 | 1152.51 | 1.196678 | 1152.51 | 1.196678 |
| 1.2      | 1152.51 | 1.2      | 1152.51 | 1.2      | 1152.51 | 1.2      | 1152.51 | 1.2      |
| 1.206678 | 1152.51 | 1.206678 | 1152.51 | 1.206678 | 1152.51 | 1.206678 | 1152.51 | 1.206678 |
| 1.21     | 1152.51 | 1.21     | 1152.51 | 1.21     | 1152.51 | 1.21     | 1152.51 | 1.21     |
| 1.216678 | 1152.51 | 1.216678 | 1152.51 | 1.216678 | 1152.51 | 1.216678 | 1152.51 | 1.216678 |
| 1.22     | 1152.51 | 1.22     | 1152.51 | 1.22     | 1152.51 | 1.22     | 1152.51 | 1.22     |
| 1.226678 | 1152.51 | 1.226678 | 1152.51 | 1.226678 | 1152.51 | 1.226678 | 1152.51 | 1.226678 |
| 1.23     | 1152.51 | 1.23     | 1152.51 | 1.23     | 1152.51 | 1.23     | 1152.51 | 1.23     |
| 1.236678 | 1152.51 | 1.236678 | 1152.51 | 1.236678 | 1152.51 | 1.236678 | 1152.51 | 1.236678 |
| 1.24     | 1152.51 | 1.24     | 1152.51 | 1.24     | 1152.51 | 1.24     | 1152.51 | 1.24     |
| 1.246678 | 1152.51 | 1.246678 | 1152.51 | 1.246678 | 1152.51 | 1.246678 | 1152.51 | 1.246678 |
| 1.25     | 1152.51 | 1.25     | 1152.51 | 1.25     | 1152.51 | 1.25     | 1152.51 | 1.25     |
| 1.256678 | 1152.51 | 1.256678 | 1152.51 | 1.256678 | 1152.51 | 1.256678 | 1152.51 | 1.256678 |
| 1.26     | 1152.51 | 1.26     | 1152.51 | 1.26     | 1152.51 | 1.26     | 1152.51 | 1.26     |
| 1.266678 | 1152.51 | 1.266678 | 1152.51 | 1.266678 | 1152.51 | 1.266678 | 1152.51 | 1.266678 |
| 1.27     | 1152.51 | 1.27     | 1152.51 | 1.27     | 1152.51 | 1.27     | 1152.51 | 1.27     |
| 1.276678 | 1152.51 | 1.276678 | 1152.51 | 1.276678 | 1152.51 | 1.276678 | 1152.51 | 1.276678 |
| 1.28     | 1152.51 | 1.28     | 1152.51 | 1.28     | 1152.51 | 1.28     | 1152.51 | 1.28     |
| 1.286678 | 1152.51 | 1.286678 | 1152.51 | 1.286678 | 1152.51 | 1.286678 | 1152.51 | 1.286678 |
| 1.29     | 1152.51 | 1.29     | 1152.51 | 1.29     | 1152.51 | 1.29     | 1152.51 | 1.29     |
| 1.296678 | 1152.51 | 1.296678 | 1152.51 | 1.296678 | 1152.51 | 1.296678 | 1152.51 | 1.296678 |
| 1.3      | 1152.51 | 1.3      | 1152.51 | 1.3      | 1152.51 | 1.3      | 1152.51 | 1.3      |
| 1.306678 | 1152.51 | 1.306678 | 1152.51 | 1.306678 | 1152.51 | 1.306678 | 1152.51 | 1.306678 |
| 1.31     | 1152.51 | 1.31     | 1152.51 | 1.31     | 1152.51 | 1.31     | 1152.51 | 1.31     |
| 1.316678 | 1152.51 | 1.316678 | 1152.51 | 1.316678 | 1152.51 | 1.316678 | 1152.51 | 1.316678 |
| 1.32     | 1152.51 | 1.32     | 1152.51 | 1.32     | 1152.51 | 1.32     | 1152.51 | 1.32     |
| 1.326678 | 1152.51 | 1.326678 | 1152.51 | 1.326678 | 1152.51 | 1.326678 | 1152.51 | 1.326678 |
| 1.33     | 1152.51 | 1.33     | 1152.51 | 1.33     | 1152.51 | 1.33     | 1152.51 | 1.33     |
| 1.336678 | 1152.51 | 1.336678 | 1152.51 | 1.336678 | 1152.51 | 1.336678 | 1152.51 | 1.336678 |
| 1.34     | 1152.51 | 1.34     | 1152.51 | 1.34     | 1152.51 | 1.34     | 1152.51 | 1.34     |
| 1.346678 | 1152.51 | 1.346678 | 1152.51 | 1.346678 | 1152.51 | 1.346678 | 1152.51 | 1.346678 |
| 1.35     | 1152.51 | 1.35     | 1152.51 | 1.35     | 1152.51 | 1.35     | 1152.51 | 1.35     |
| 1.356678 | 1152.51 | 1.356678 | 1152.51 | 1.356678 | 1152.51 | 1.356678 | 1152.51 | 1.356678 |
| 1.36     | 1152.51 | 1.36     | 1152.51 | 1.36     | 1152.51 | 1.36     | 1152.51 | 1.36     |
| 1.366678 | 1152.51 | 1.366678 | 1152.51 | 1.366678 | 1152.51 | 1.366678 | 1152.51 | 1.366678 |
| 1.37     | 1152.51 | 1.37     | 1152.51 | 1.37     | 1152.51 | 1.37     | 1152.51 | 1.37     |
| 1.376678 | 1152.51 | 1.376678 | 1152.51 | 1.376678 | 1152.51 | 1.376678 | 1152.51 | 1.376678 |
| 1.38     | 1152.51 | 1.38     | 1152.51 | 1.38     | 1152.51 | 1.38     | 1152.51 | 1.38     |
| 1.386678 | 1152.51 | 1.386678 | 1152.51 | 1.386678 | 1152.51 | 1.386678 | 1152.51 | 1.386678 |

|          |         |          |         |          |         |          |         |          |
|----------|---------|----------|---------|----------|---------|----------|---------|----------|
| 1.39     | 1152.51 | 1.39     | 1152.51 | 1.39     | 1152.51 | 1.39     | 1152.51 | 1.39     |
| 1.396678 | 1152.51 | 1.396678 | 1152.51 | 1.396678 | 1152.51 | 1.396678 | 1152.51 | 1.396678 |
| 1.4      | 1152.51 | 1.4      | 1152.51 | 1.4      | 1152.51 | 1.4      | 1152.51 | 1.4      |
| 1.406678 | 1152.51 | 1.406678 | 1152.51 | 1.406678 | 1152.51 | 1.406678 | 1152.51 | 1.406678 |
| 1.41     | 1152.51 | 1.41     | 1152.51 | 1.41     | 1152.51 | 1.41     | 1152.51 | 1.41     |
| 1.416678 | 1152.51 | 1.416678 | 1152.51 | 1.416678 | 1152.51 | 1.416678 | 1152.51 | 1.416678 |
| 1.42     | 1152.51 | 1.42     | 1152.51 | 1.42     | 1152.51 | 1.42     | 1152.51 | 1.42     |
| 1.426678 | 1152.51 | 1.426678 | 1152.51 | 1.426678 | 1152.51 | 1.426678 | 1152.51 | 1.426678 |
| 1.43     | 1152.51 | 1.43     | 1152.51 | 1.43     | 1152.51 | 1.43     | 1152.51 | 1.43     |
| 1.436678 | 1152.51 | 1.436678 | 1152.51 | 1.436678 | 1152.51 | 1.436678 | 1152.51 | 1.436678 |
| 1.44     | 1152.51 | 1.44     | 1152.51 | 1.44     | 1152.51 | 1.44     | 1152.51 | 1.44     |
| 1.446678 | 1152.51 | 1.446678 | 1152.51 | 1.446678 | 1152.51 | 1.446678 | 1152.51 | 1.446678 |
| 1.45     | 1152.51 | 1.45     | 1152.51 | 1.45     | 1152.51 | 1.45     | 1152.51 | 1.45     |
| 1.456678 | 1152.51 | 1.456678 | 1152.51 | 1.456678 | 1152.51 | 1.456678 | 1152.51 | 1.456678 |
| 1.46     | 1152.51 | 1.46     | 1152.51 | 1.46     | 1152.51 | 1.46     | 1152.51 | 1.46     |
| 1.466678 | 1152.51 | 1.466678 | 1152.51 | 1.466678 | 1152.51 | 1.466678 | 1152.51 | 1.466678 |
| 1.47     | 1152.51 | 1.47     | 1152.51 | 1.47     | 1152.51 | 1.47     | 1152.51 | 1.47     |
| 1.476678 | 1152.51 | 1.476678 | 1152.51 | 1.476678 | 1152.51 | 1.476678 | 1152.51 | 1.476678 |
| 1.48     | 1152.51 | 1.48     | 1152.51 | 1.48     | 1152.51 | 1.48     | 1152.51 | 1.48     |
| 1.486678 | 1152.51 | 1.486678 | 1152.51 | 1.486678 | 1152.51 | 1.486678 | 1152.51 | 1.486678 |
| 1.49     | 1152.51 | 1.49     | 1152.51 | 1.49     | 1152.51 | 1.49     | 1152.51 | 1.49     |
| 1.496678 | 1152.51 | 1.496678 | 1152.51 | 1.496678 | 1152.51 | 1.496678 | 1152.51 | 1.496678 |
| 1.5      | 1152.51 | 1.5      | 1152.51 | 1.5      | 1152.51 | 1.5      | 1152.51 | 1.5      |
| 1.506678 | 1152.51 | 1.506678 | 1152.51 | 1.506678 | 1152.51 | 1.506678 | 1152.51 | 1.506678 |
| 1.51     | 1152.51 | 1.51     | 1152.51 | 1.51     | 1152.51 | 1.51     | 1152.51 | 1.51     |
| 1.516678 | 1152.51 | 1.516678 | 1152.51 | 1.516678 | 1152.51 | 1.516678 | 1152.51 | 1.516678 |
| 1.52     | 1152.51 | 1.52     | 1152.51 | 1.52     | 1152.51 | 1.52     | 1152.51 | 1.52     |
| 1.526678 | 1152.51 | 1.526678 | 1152.51 | 1.526678 | 1152.51 | 1.526678 | 1152.51 | 1.526678 |
| 1.53     | 1152.51 | 1.53     | 1152.51 | 1.53     | 1152.51 | 1.53     | 1152.51 | 1.53     |
| 1.536678 | 1152.51 | 1.536678 | 1152.51 | 1.536678 | 1152.51 | 1.536678 | 1152.51 | 1.536678 |
| 1.54     | 1152.51 | 1.54     | 1152.51 | 1.54     | 1152.51 | 1.54     | 1152.51 | 1.54     |
| 1.546678 | 1152.51 | 1.546678 | 1152.51 | 1.546678 | 1152.51 | 1.546678 | 1152.51 | 1.546678 |
| 1.55     | 1152.51 | 1.55     | 1152.51 | 1.55     | 1152.51 | 1.55     | 1152.51 | 1.55     |
| 1.556678 | 1152.51 | 1.556678 | 1152.51 | 1.556678 | 1152.51 | 1.556678 | 1152.51 | 1.556678 |
| 1.56     | 1152.51 | 1.56     | 1152.51 | 1.56     | 1152.51 | 1.56     | 1152.51 | 1.56     |
| 1.566678 | 1152.51 | 1.566678 | 1152.51 | 1.566678 | 1152.51 | 1.566678 | 1152.51 | 1.566678 |
| 1.57     | 1152.51 | 1.57     | 1152.51 | 1.57     | 1152.51 | 1.57     | 1152.51 | 1.57     |
| 1.576678 | 1152.51 | 1.576678 | 1152.51 | 1.576678 | 1152.51 | 1.576678 | 1152.51 | 1.576678 |
| 1.58     | 1152.51 | 1.58     | 1152    |          |         |          |         |          |

|          |         |            |         |          |         |          |         |          |
|----------|---------|------------|---------|----------|---------|----------|---------|----------|
| 1.626678 | 1152.51 | 1.626678   | 1152.51 | 1.626678 | 1152.51 | 1.626678 | 1152.51 | 1.626678 |
| 1.63     | 1152.51 | 1.63       | 1152.51 | 1.63     | 1152.51 | 1.63     | 1152.51 | 1.63     |
| 1.636678 | 1152.51 | 1.636678   | 1152.51 | 1.636678 | 1152.51 | 1.636678 | 1152.51 | 1.636678 |
| 1.64     | 1152.51 | 1.64       | 1152.51 | 1.64     | 1152.51 | 1.64     | 1152.51 | 1.64     |
| 1.646678 | 1152.51 | 1.646678   | 1152.51 | 1.646678 | 1152.51 | 1.646678 | 1152.51 | 1.646678 |
| 1.65     | 1152.51 | 1.65       | 1152.51 | 1.65     | 1152.51 | 1.65     | 1152.51 | 1.65     |
| 1.656678 | 1152.51 | 1.656678   | 1152.51 | 1.656678 | 1152.51 | 1.656678 | 1152.51 | 1.656678 |
| 1.66     | 1152.51 | 1.66       | 1152.51 | 1.66     | 1152.51 | 1.66     | 1152.51 | 1.66     |
| 1.666678 | 1152.51 | 1.666678   | 1152.51 | 1.666678 | 1152.51 | 1.666678 | 1152.51 | 1.666678 |
| 1.67     | 1152.51 | 1.67       | 1152.51 | 1.67     | 1152.51 | 1.67     | 1152.51 | 1.67     |
| 1.676678 | 1152.51 | 1.676678   | 1152.51 | 1.676678 | 1152.51 | 1.676678 | 1152.51 | 1.676678 |
| 1.68     | 1152.51 | 1.68       | 1152.51 | 1.68     | 1152.51 | 1.68     | 1152.51 | 1.68     |
| 1.686678 | 1152.51 | 1.686678   | 1152.51 | 1.686678 | 1152.51 | 1.686678 | 1152.51 | 1.686678 |
| 1.69     | 1152.51 | 1.69       | 1152.51 | 1.69     | 1152.51 | 1.69     | 1152.51 | 1.69     |
| 1.696678 | 1152.51 | 1.696678   | 1152.51 | 1.696678 | 1152.51 | 1.696678 | 1152.51 | 1.696678 |
| 1.7      | 1152.51 | 1.7        | 1152.51 | 1.7      | 1152.51 | 1.7      | 1152.51 | 1.7      |
| 1.706678 | 1152.51 | 1.706678   | 1152.51 | 1.706678 | 1152.51 | 1.706678 | 1152.51 | 1.706678 |
| 1.71     | 1152.51 | 1.71       | 1152.51 | 1.71     | 1152.51 | 1.71     | 1152.51 | 1.71     |
| 1.716678 | 1152.51 | 1.716678   | 1152.51 | 1.716678 | 1152.51 | 1.716678 | 1152.51 | 1.716678 |
| 1.72     | 1152.51 | 1.72       | 1152.51 | 1.72     | 1152.51 | 1.72     | 1152.51 | 1.72     |
| 1.726678 | 1152.51 | 1.726678   | 1152.51 | 1.726678 | 1152.51 | 1.726678 | 1152.51 | 1.726678 |
| 1.73     | 1152.51 | 1.73       | 1152.51 | 1.73     | 1152.51 | 1.73     | 1152.51 | 1.73     |
| 1.736678 | 1152.51 | 1.736678   | 1152.51 | 1.736678 | 1152.51 | 1.736678 | 1152.51 | 1.736678 |
| 1.74     | 1152.51 | 1.74       | 1152.51 | 1.74     | 1152.51 | 1.74     | 1152.51 | 1.74     |
| 1.746678 | 1152.51 | 1.746678   | 1152.51 | 1.746678 | 1152.51 | 1.746678 | 1152.51 | 1.746678 |
| 1.75     | 1152.51 | 1.75       | 1152.51 | 1.75     | 1152.51 | 1.75     | 1152.51 | 1.75     |
| 1.756678 | 1152.51 | 1.756678   | 1152.51 | 1.756678 | 1152.51 | 1.756678 | 1152.51 | 1.756678 |
| 1.76     | 1152.51 | 1.76       | 1152.51 | 1.76     | 1152.51 | 1.76     | 1152.51 | 1.76     |
| 1.766678 | 1152.51 | 1.766678   | 1152.51 | 1.766678 | 1152.51 | 1.766678 | 1152.51 | 1.766678 |
| 1.77     | 1152.51 | 1.77       | 1152.51 | 1.77     | 1152.51 | 1.77     | 1152.51 | 1.77     |
| 1.776678 | 1152.51 | 1.776678   | 1152.51 | 1.776678 | 1152.51 | 1.776678 | 1152.51 | 1.776678 |
| 1.78     | 1152.51 | 1.78       | 1152.51 | 1.78     | 1152.51 | 1.78     | 1152.51 | 1.78     |
| 1.786678 | 1152.51 | 1.786678   | 1152.51 | 1.786678 | 1152.51 | 1.786678 | 1152.51 | 1.786678 |
| 1.79     | 1152.51 | 1.79       | 1152.51 | 1.79     | 1152.51 | 1.79     | 1152.51 | 1.79     |
| 1.796678 | 1152.51 | 1.796678   | 1152.51 | 1.796678 | 1152.51 | 1.796678 | 1152.51 | 1.796678 |
| 1.8      | 1152.51 | 1.8        | 1152.51 | 1.8      | 1152.51 | 1.8      | 1152.51 | 1.8      |
| 1.806678 | 1152.51 | 1.806678   | 1152.51 | 1.806678 | 1152.51 | 1.806678 | 1152.51 | 1.806678 |
| 1.81     | 1152.51 | 1.81       | 1152.51 | 1.81     | 1152.51 | 1.81     | 1152.51 | 1.81     |
| 1.816678 | 1152.51 | 1.816678</ |         |          |         |          |         |          |

|          |         |          |         |          |         |          |         |          |
|----------|---------|----------|---------|----------|---------|----------|---------|----------|
| 1.86     | 1152.51 | 1.86     | 1152.51 | 1.86     | 1152.51 | 1.86     | 1152.51 | 1.86     |
| 1.866678 | 1152.51 | 1.866678 | 1152.51 | 1.866678 | 1152.51 | 1.866678 | 1152.51 | 1.866678 |
| 1.87     | 1152.51 | 1.87     | 1152.51 | 1.87     | 1152.51 | 1.87     | 1152.51 | 1.87     |
| 1.876678 | 1152.51 | 1.876678 | 1152.51 | 1.876678 | 1152.51 | 1.876678 | 1152.51 | 1.876678 |
| 1.88     | 1152.51 | 1.88     | 1152.51 | 1.88     | 1152.51 | 1.88     | 1152.51 | 1.88     |
| 1.886678 | 1152.51 | 1.886678 | 1152.51 | 1.886678 | 1152.51 | 1.886678 | 1152.51 | 1.886678 |
| 1.89     | 1152.51 | 1.89     | 1152.51 | 1.89     | 1152.51 | 1.89     | 1152.51 | 1.89     |
| 1.896678 | 1152.51 | 1.896678 | 1152.51 | 1.896678 | 1152.51 | 1.896678 | 1152.51 | 1.896678 |
| 1.9      | 1152.51 | 1.9      | 1152.51 | 1.9      | 1152.51 | 1.9      | 1152.51 | 1.9      |
| 1.906678 | 1152.51 | 1.906678 | 1152.51 | 1.906678 | 1152.51 | 1.906678 | 1152.51 | 1.906678 |
| 1.91     | 1152.51 | 1.91     | 1152.51 | 1.91     | 1152.51 | 1.91     | 1152.51 | 1.91     |
| 1.916678 | 1152.51 | 1.916678 | 1152.51 | 1.916678 | 1152.51 | 1.916678 | 1152.51 | 1.916678 |
| 1.92     | 1152.51 | 1.92     | 1152.51 | 1.92     | 1152.51 | 1.92     | 1152.51 | 1.92     |
| 1.926678 | 1152.51 | 1.926678 | 1152.51 | 1.926678 | 1152.51 | 1.926678 | 1152.51 | 1.926678 |
| 1.93     | 1152.51 | 1.93     | 1152.51 | 1.93     | 1152.51 | 1.93     | 1152.51 | 1.93     |
| 1.936678 | 1152.51 | 1.936678 | 1152.51 | 1.936678 | 1152.51 | 1.936678 | 1152.51 | 1.936678 |
| 1.94     | 1152.51 | 1.94     | 1152.51 | 1.94     | 1152.51 | 1.94     | 1152.51 | 1.94     |
| 1.946678 | 1152.51 | 1.946678 | 1152.51 | 1.946678 | 1152.51 | 1.946678 | 1152.51 | 1.946678 |
| 1.95     | 1152.51 | 1.95     | 1152.51 | 1.95     | 1152.51 | 1.95     | 1152.51 | 1.95     |
| 1.956678 | 1152.51 | 1.956678 | 1152.51 | 1.956678 | 1152.51 | 1.956678 | 1152.51 | 1.956678 |
| 1.96     | 1152.51 | 1.96     | 1152.51 | 1.96     | 1152.51 | 1.96     | 1152.51 | 1.96     |
| 1.966678 | 1152.51 | 1.966678 | 1152.51 | 1.966678 | 1152.51 | 1.966678 | 1152.51 | 1.966678 |
| 1.97     | 1152.51 | 1.97     | 1152.51 | 1.97     | 1152.51 | 1.97     | 1152.51 | 1.97     |
| 1.976678 | 1152.51 | 1.976678 | 1152.51 | 1.976678 | 1152.51 | 1.976678 | 1152.51 | 1.976678 |
| 1.98     | 1152.51 | 1.98     | 1152.51 | 1.98     | 1152.51 | 1.98     | 1152.51 | 1.98     |
| 1.986678 | 1152.51 | 1.986678 | 1152.51 | 1.986678 | 1152.51 | 1.986678 | 1152.51 | 1.986678 |
| 1.99     | 1152.51 | 1.99     | 1152.51 | 1.99     | 1152.51 | 1.99     | 1152.51 | 1.99     |
| 1.996678 | 1152.51 | 1.996678 | 1152.51 | 1.996678 | 1152.51 | 1.996678 | 1152.51 | 1.996678 |
| 2        | 1152.51 | 2        | 1152.51 | 2        | 1152.51 | 2        | 1152.51 | 2        |
| 2.006678 | 1152.51 | 2.006678 | 1152.51 | 2.006678 | 1152.51 | 2.006678 | 1152.51 | 2.006678 |
| 2.01     | 1152.51 | 2.01     | 1152.51 | 2.01     | 1152.51 | 2.01     | 1152.51 | 2.01     |
| 2.016678 | 1152.51 | 2.016678 | 1152.51 | 2.016678 | 1152.51 | 2.016678 | 1152.51 | 2.016678 |
| 2.02     | 1152.51 | 2.02     | 1152.51 | 2.02     | 1152.51 | 2.02     | 1152.51 | 2.02     |
| 2.026678 | 1152.51 | 2.026678 | 1152.51 | 2.026678 | 1152.51 | 2.026678 | 1152.51 | 2.026678 |
| 2.03     | 1152.51 | 2.03     | 1152.51 | 2.03     | 1152.51 | 2.03     | 1152.51 | 2.03     |
| 2.036678 | 1152.51 | 2.036678 | 1152.51 | 2.036678 | 1152.51 | 2.036678 | 1152.51 | 2.036678 |
| 2.04     | 1152.51 | 2.04     | 1152.51 | 2.04     | 1152.51 | 2.04     | 1152.51 | 2.04     |
| 2.046678 | 1152.51 | 2.046678 | 1152.51 | 2.046678 | 1152.51 | 2.046678 | 1152.51 | 2.046678 |
| 2.05     | 1152.51 | 2.05     | 1152.51 | 2.05     | 1152.51 | 2.05     | 1152.51 | 2.05     |
| 2.056678 | 1152.51 | 2.056678 | 1152.51 | 2.056678 | 1152.51 | 2.056678 | 1152.51 | 2.056678 |
| 2.06     | 1152.51 | 2.06     | 1152.51 | 2.06     | 1152.51 | 2.06     | 1152.51 | 2.06     |
| 2.066678 | 1152.51 | 2.066678 | 1152.51 | 2.066678 | 1152.51 | 2.066678 | 1152.51 | 2.066678 |
| 2.07     | 1152.51 | 2.07     | 1152.51 | 2.07     | 1152.51 | 2.07     | 1152.51 | 2.07     |
| 2.076678 | 1152.51 | 2.076678 | 1152.51 | 2.076678 | 1152.51 | 2.076678 | 1152.51 | 2.076678 |
| 2.08     | 1152.51 | 2.08     | 1152.51 | 2.08     | 1152.51 | 2.08     | 1152.51 | 2.08     |
| 2.086678 | 1152.51 | 2.086678 | 1152.51 | 2.086678 | 1152.51 | 2.086678 | 1152.51 | 2.086678 |
| 2.09     | 1152.51 | 2.09     | 1152.51 | 2.09     | 1152.51 | 2.09     | 1152.51 | 2.09     |

|          |         |          |         |          |         |          |         |          |
|----------|---------|----------|---------|----------|---------|----------|---------|----------|
| 2.096678 | 1152.51 | 2.096678 | 1152.51 | 2.096678 | 1152.51 | 2.096678 | 1152.51 | 2.096678 |
| 2.1      | 1152.51 | 2.1      | 1152.51 | 2.1      | 1152.51 | 2.1      | 1152.51 | 2.1      |
| 2.106678 | 1152.51 | 2.106678 | 1152.51 | 2.106678 | 1152.51 | 2.106678 | 1152.51 | 2.106678 |
| 2.11     | 1152.51 | 2.11     | 1152.51 | 2.11     | 1152.51 | 2.11     | 1152.51 | 2.11     |
| 2.116678 | 1152.51 | 2.116678 | 1152.51 | 2.116678 | 1152.51 | 2.116678 | 1152.51 | 2.116678 |
| 2.12     | 1152.51 | 2.12     | 1152.51 | 2.12     | 1152.51 | 2.12     | 1152.51 | 2.12     |
| 2.126678 | 1152.51 | 2.126678 | 1152.51 | 2.126678 | 1152.51 | 2.126678 | 1152.51 | 2.126678 |
| 2.13     | 1152.51 | 2.13     | 1152.51 | 2.13     | 1152.51 | 2.13     | 1152.51 | 2.13     |
| 2.136678 | 1152.51 | 2.136678 | 1152.51 | 2.136678 | 1152.51 | 2.136678 | 1152.51 | 2.136678 |
| 2.14     | 1152.51 | 2.14     | 1152.51 | 2.14     | 1152.51 | 2.14     | 1152.51 | 2.14     |
| 2.146678 | 1152.51 | 2.146678 | 1152.51 | 2.146678 | 1152.51 | 2.146678 | 1152.51 | 2.146678 |
| 2.15     | 1152.51 | 2.15     | 1152.51 | 2.15     | 1152.51 | 2.15     | 1152.51 | 2.15     |
| 2.156678 | 1152.51 | 2.156678 | 1152.51 | 2.156678 | 1152.51 | 2.156678 | 1152.51 | 2.156678 |
| 2.16     | 1152.51 | 2.16     | 1152.51 | 2.16     | 1152.51 | 2.16     | 1152.51 | 2.16     |
| 2.166678 | 1152.51 | 2.166678 | 1152.51 | 2.166678 | 1152.51 | 2.166678 | 1152.51 | 2.166678 |
| 2.17     | 1152.51 | 2.17     | 1152.51 | 2.17     | 1152.51 | 2.17     | 1152.51 | 2.17     |
| 2.176678 | 1152.51 | 2.176678 | 1152.51 | 2.176678 | 1152.51 | 2.176678 | 1152.51 | 2.176678 |
| 2.18     | 1152.51 | 2.18     | 1152.51 | 2.18     | 1152.51 | 2.18     | 1152.51 | 2.18     |
| 2.186678 | 1152.51 | 2.186678 | 1152.51 | 2.186678 | 1152.51 | 2.186678 | 1152.51 | 2.186678 |
| 2.19     | 1152.51 | 2.19     | 1152.51 | 2.19     | 1152.51 | 2.19     | 1152.51 | 2.19     |
| 2.196678 | 1152.51 | 2.196678 | 1152.51 | 2.196678 | 1152.51 | 2.196678 | 1152.51 | 2.196678 |
| 2.2      | 1152.51 | 2.2      | 1152.51 | 2.2      | 1152.51 | 2.2      | 1152.51 | 2.2      |
| 2.206678 | 1152.51 | 2.206678 | 1152.51 | 2.206678 | 1152.51 | 2.206678 | 1152.51 | 2.206678 |
| 2.21     | 1152.51 | 2.21     | 1152.51 | 2.21     | 1152.51 | 2.21     | 1152.51 | 2.21     |
| 2.216678 | 1152.51 | 2.216678 | 1152.51 | 2.216678 | 1152.51 | 2.216678 | 1152.51 | 2.216678 |
| 2.22     | 1152.51 | 2.22     | 1152.51 | 2.22     | 1152.51 | 2.22     | 1152.51 | 2.22     |
| 2.226678 | 1152.51 | 2.226678 | 1152.51 | 2.226678 | 1152.51 | 2.226678 | 1152.51 | 2.226678 |
| 2.23     | 1152.51 | 2.23     | 1152.51 | 2.23     | 1152.51 | 2.23     | 1152.51 | 2.23     |
| 2.236678 | 1152.51 | 2.236678 | 1152.51 | 2.236678 | 1152.51 | 2.236678 | 1152.51 | 2.236678 |
| 2.24     | 1152.51 | 2.24     | 1152.51 | 2.24     | 1152.51 | 2.24     | 1152.51 | 2.24     |
| 2.246678 | 1152.51 | 2.246678 | 1152.51 | 2.246678 | 1152.51 | 2.246678 | 1152.51 | 2.246678 |
| 2.25     | 1152.51 | 2.25     | 1152.51 | 2.25     | 1152.51 | 2.25     | 1152.51 | 2.25     |
| 2.256678 | 1152.51 | 2.256678 | 1152.51 | 2.256678 | 1152.51 | 2.256678 | 1152.51 | 2.256678 |
| 2.26     | 1152.51 | 2.26     | 1152.51 | 2.26     | 1152.51 | 2.26     | 1152.51 | 2.26     |
| 2.266678 | 1152.51 | 2.266678 | 1152.51 | 2.266678 | 1152.51 | 2.266678 | 1152.51 | 2.266678 |
| 2.27     | 1152.51 | 2.27     | 1152.51 | 2.27     | 1152.51 | 2.27     | 1152.51 | 2.27     |
| 2.276678 | 1152.51 | 2.276678 | 1152.51 | 2.276678 | 1152.51 | 2.276678 | 1152.51 | 2.276678 |
| 2.28     | 1152.51 | 2.28     | 1152.51 | 2.28     | 1152.51 | 2.28     | 1152.51 | 2.28     |
| 2.286678 | 1152.51 | 2.286678 | 1152.51 | 2.286678 | 1152.51 | 2.286678 | 1152.51 | 2.286678 |
| 2.29     | 1152.51 | 2.29     | 1152.51 | 2.29     | 1152.51 | 2.29     | 1152.51 | 2.29     |
| 2.296678 | 1152.51 | 2.296678 | 1152.51 | 2.296678 | 1152.51 | 2.296678 | 1152.51 | 2.296678 |
| 2.3      | 1152.51 | 2.3      | 1152.51 | 2.3      | 1152.51 | 2.3      | 1152.51 | 2.3      |
| 2.306678 | 1152.51 | 2.306678 | 1152.51 | 2.306678 | 1152.51 | 2.306678 | 1152.51 | 2.306678 |
| 2.31     | 1152.51 | 2.31     | 1152.51 | 2.31     | 1152.51 | 2.31     | 1152.51 | 2.31     |
| 2.316678 | 1152.51 | 2.316678 | 1152.51 | 2.316678 | 1152.51 | 2.316678 | 1152.51 | 2.316678 |
| 2.32     | 1152.51 | 2.32     | 1152.51 | 2.32     | 1152.51 | 2.32     | 1152.51 | 2.32     |
| 2.326678 | 1152.51 | 2.326678 | 1152.51 | 2.326678 | 1152.51 | 2.326678 | 1152.51 | 2.326678 |

|          |         |          |         |          |         |          |         |          |
|----------|---------|----------|---------|----------|---------|----------|---------|----------|
| 2.33     | 1152.51 | 2.33     | 1152.51 | 2.33     | 1152.51 | 2.33     | 1152.51 | 2.33     |
| 2.336678 | 1152.51 | 2.336678 | 1152.51 | 2.336678 | 1152.51 | 2.336678 | 1152.51 | 2.336678 |
| 2.34     | 1152.51 | 2.34     | 1152.51 | 2.34     | 1152.51 | 2.34     | 1152.51 | 2.34     |
| 2.346678 | 1152.51 | 2.346678 | 1152.51 | 2.346678 | 1152.51 | 2.346678 | 1152.51 | 2.346678 |
| 2.35     | 1152.51 | 2.35     | 1152.51 | 2.35     | 1152.51 | 2.35     | 1152.51 | 2.35     |
| 2.356678 | 1152.51 | 2.356678 | 1152.51 | 2.356678 | 1152.51 | 2.356678 | 1152.51 | 2.356678 |
| 2.36     | 1152.51 | 2.36     | 1152.51 | 2.36     | 1152.51 | 2.36     | 1152.51 | 2.36     |
| 2.366678 | 1152.51 | 2.366678 | 1152.51 | 2.366678 | 1152.51 | 2.366678 | 1152.51 | 2.366678 |
| 2.37     | 1152.51 | 2.37     | 1152.51 | 2.37     | 1152.51 | 2.37     | 1152.51 | 2.37     |
| 2.376678 | 1152.51 | 2.376678 | 1152.51 | 2.376678 | 1152.51 | 2.376678 | 1152.51 | 2.376678 |
| 2.38     | 1152.51 | 2.38     | 1152.51 | 2.38     | 1152.51 | 2.38     | 1152.51 | 2.38     |
| 2.386678 | 1152.51 | 2.386678 | 1152.51 | 2.386678 | 1152.51 | 2.386678 | 1152.51 | 2.386678 |
| 2.39     | 1152.51 | 2.39     | 1152.51 | 2.39     | 1152.51 | 2.39     | 1152.51 | 2.39     |
| 2.396678 | 1152.51 | 2.396678 | 1152.51 | 2.396678 | 1152.51 | 2.396678 | 1152.51 | 2.396678 |
| 2.4      | 1152.51 | 2.4      | 1152.51 | 2.4      | 1152.51 | 2.4      | 1152.51 | 2.4      |
| 2.406678 | 1152.51 | 2.406678 | 1152.51 | 2.406678 | 1152.51 | 2.406678 | 1152.51 | 2.406678 |
| 2.41     | 1152.51 | 2.41     | 1152.51 | 2.41     | 1152.51 | 2.41     | 1152.51 | 2.41     |
| 2.416678 | 1152.51 | 2.416678 | 1152.51 | 2.416678 | 1152.51 | 2.416678 | 1152.51 | 2.416678 |
| 2.42     | 1152.51 | 2.42     | 1152.51 | 2.42     | 1152.51 | 2.42     | 1152.51 | 2.42     |
| 2.426678 | 1152.51 | 2.426678 | 1152.51 | 2.426678 | 1152.51 | 2.426678 | 1152.51 | 2.426678 |
| 2.43     | 1152.51 | 2.43     | 1152.51 | 2.43     | 1152.51 | 2.43     | 1152.51 | 2.43     |
| 2.436678 | 1152.51 | 2.436678 | 1152.51 | 2.436678 | 1152.51 | 2.436678 | 1152.51 | 2.436678 |
| 2.44     | 1152.51 | 2.44     | 1152.51 | 2.44     | 1152.51 | 2.44     | 1152.51 | 2.44     |
| 2.446678 | 1152.51 | 2.446678 | 1152.51 | 2.446678 | 1152.51 | 2.446678 | 1152.51 | 2.446678 |
| 2.45     | 1152.51 | 2.45     | 1152.51 | 2.45     | 1152.51 | 2.45     | 1152.51 | 2.45     |
| 2.456678 | 1152.51 | 2.456678 | 1152.51 | 2.456678 | 1152.51 | 2.456678 | 1152.51 | 2.456678 |
| 2.46     | 1152.51 | 2.46     | 1152.51 | 2.46     | 1152.51 | 2.46     | 1152.51 | 2.46     |
| 2.466678 | 1152.51 | 2.466678 | 1152.51 | 2.466678 | 1152.51 | 2.466678 | 1152.51 | 2.466678 |
| 2.47     | 1152.51 | 2.47     | 1152.51 | 2.47     | 1152.51 | 2.47     | 1152.51 | 2.47     |
| 2.476678 | 1152.51 | 2.476678 | 1152.51 | 2.476678 | 1152.51 | 2.476678 | 1152.51 | 2.476678 |
| 2.48     | 1152.51 | 2.48     | 1152.51 | 2.48     | 1152.51 | 2.48     | 1152.51 | 2.48     |
| 2.486678 | 1152.51 | 2.486678 | 1152.51 | 2.486678 | 1152.51 | 2.486678 | 1152.51 | 2.486678 |
| 2.49     | 1152.51 | 2.49     | 1152.51 | 2.49     | 1152.51 | 2.49     | 1152.51 | 2.49     |
| 2.496678 | 1152.51 | 2.496678 | 1152.51 | 2.496678 | 1152.51 | 2.496678 | 1152.51 | 2.496678 |
| 2.5      | 1152.51 | 2.5      | 1152.51 | 2.5      | 1152.51 | 2.5      | 1152.51 | 2.5      |
| 2.506678 | 1152.51 | 2.506678 | 1152.51 | 2.506678 | 1152.51 | 2.506678 | 1152.51 | 2.506678 |
| 2.51     | 1152.51 | 2.51     | 1152.51 | 2.51     | 1152.51 | 2.51     | 1152.51 | 2.51     |
| 2.516678 | 1152.51 | 2.516678 | 1152.51 | 2.516678 | 1152.51 | 2.516678 | 1152.51 | 2.516678 |
| 2.52     | 1152.51 | 2.52     | 1152    |          |         |          |         |          |

|          |         |            |         |          |         |          |         |          |
|----------|---------|------------|---------|----------|---------|----------|---------|----------|
| 2.566678 | 1152.51 | 2.566678   | 1152.51 | 2.566678 | 1152.51 | 2.566678 | 1152.51 | 2.566678 |
| 2.57     | 1152.51 | 2.57       | 1152.51 | 2.57     | 1152.51 | 2.57     | 1152.51 | 2.57     |
| 2.576678 | 1152.51 | 2.576678   | 1152.51 | 2.576678 | 1152.51 | 2.576678 | 1152.51 | 2.576678 |
| 2.58     | 1152.51 | 2.58       | 1152.51 | 2.58     | 1152.51 | 2.58     | 1152.51 | 2.58     |
| 2.586678 | 1152.51 | 2.586678   | 1152.51 | 2.586678 | 1152.51 | 2.586678 | 1152.51 | 2.586678 |
| 2.59     | 1152.51 | 2.59       | 1152.51 | 2.59     | 1152.51 | 2.59     | 1152.51 | 2.59     |
| 2.596678 | 1152.51 | 2.596678   | 1152.51 | 2.596678 | 1152.51 | 2.596678 | 1152.51 | 2.596678 |
| 2.6      | 1152.51 | 2.6        | 1152.51 | 2.6      | 1152.51 | 2.6      | 1152.51 | 2.6      |
| 2.606678 | 1152.51 | 2.606678   | 1152.51 | 2.606678 | 1152.51 | 2.606678 | 1152.51 | 2.606678 |
| 2.61     | 1152.51 | 2.61       | 1152.51 | 2.61     | 1152.51 | 2.61     | 1152.51 | 2.61     |
| 2.616678 | 1152.51 | 2.616678   | 1152.51 | 2.616678 | 1152.51 | 2.616678 | 1152.51 | 2.616678 |
| 2.62     | 1152.51 | 2.62       | 1152.51 | 2.62     | 1152.51 | 2.62     | 1152.51 | 2.62     |
| 2.626678 | 1152.51 | 2.626678   | 1152.51 | 2.626678 | 1152.51 | 2.626678 | 1152.51 | 2.626678 |
| 2.63     | 1152.51 | 2.63       | 1152.51 | 2.63     | 1152.51 | 2.63     | 1152.51 | 2.63     |
| 2.636678 | 1152.51 | 2.636678   | 1152.51 | 2.636678 | 1152.51 | 2.636678 | 1152.51 | 2.636678 |
| 2.64     | 1152.51 | 2.64       | 1152.51 | 2.64     | 1152.51 | 2.64     | 1152.51 | 2.64     |
| 2.646678 | 1152.51 | 2.646678   | 1152.51 | 2.646678 | 1152.51 | 2.646678 | 1152.51 | 2.646678 |
| 2.65     | 1152.51 | 2.65       | 1152.51 | 2.65     | 1152.51 | 2.65     | 1152.51 | 2.65     |
| 2.656678 | 1152.51 | 2.656678   | 1152.51 | 2.656678 | 1152.51 | 2.656678 | 1152.51 | 2.656678 |
| 2.66     | 1152.51 | 2.66       | 1152.51 | 2.66     | 1152.51 | 2.66     | 1152.51 | 2.66     |
| 2.666678 | 1152.51 | 2.666678   | 1152.51 | 2.666678 | 1152.51 | 2.666678 | 1152.51 | 2.666678 |
| 2.67     | 1152.51 | 2.67       | 1152.51 | 2.67     | 1152.51 | 2.67     | 1152.51 | 2.67     |
| 2.676678 | 1152.51 | 2.676678   | 1152.51 | 2.676678 | 1152.51 | 2.676678 | 1152.51 | 2.676678 |
| 2.68     | 1152.51 | 2.68       | 1152.51 | 2.68     | 1152.51 | 2.68     | 1152.51 | 2.68     |
| 2.686678 | 1152.51 | 2.686678   | 1152.51 | 2.686678 | 1152.51 | 2.686678 | 1152.51 | 2.686678 |
| 2.69     | 1152.51 | 2.69       | 1152.51 | 2.69     | 1152.51 | 2.69     | 1152.51 | 2.69     |
| 2.696678 | 1152.51 | 2.696678   | 1152.51 | 2.696678 | 1152.51 | 2.696678 | 1152.51 | 2.696678 |
| 2.7      | 1152.51 | 2.7        | 1152.51 | 2.7      | 1152.51 | 2.7      | 1152.51 | 2.7      |
| 2.706678 | 1152.51 | 2.706678   | 1152.51 | 2.706678 | 1152.51 | 2.706678 | 1152.51 | 2.706678 |
| 2.71     | 1152.51 | 2.71       | 1152.51 | 2.71     | 1152.51 | 2.71     | 1152.51 | 2.71     |
| 2.716678 | 1152.51 | 2.716678   | 1152.51 | 2.716678 | 1152.51 | 2.716678 | 1152.51 | 2.716678 |
| 2.72     | 1152.51 | 2.72       | 1152.51 | 2.72     | 1152.51 | 2.72     | 1152.51 | 2.72     |
| 2.726678 | 1152.51 | 2.726678   | 1152.51 | 2.726678 | 1152.51 | 2.726678 | 1152.51 | 2.726678 |
| 2.73     | 1152.51 | 2.73       | 1152.51 | 2.73     | 1152.51 | 2.73     | 1152.51 | 2.73     |
| 2.736678 | 1152.51 | 2.736678   | 1152.51 | 2.736678 | 1152.51 | 2.736678 | 1152.51 | 2.736678 |
| 2.74     | 1152.51 | 2.74       | 1152.51 | 2.74     | 1152.51 | 2.74     | 1152.51 | 2.74     |
| 2.746678 | 1152.51 | 2.746678   | 1152.51 | 2.746678 | 1152.51 | 2.746678 | 1152.51 | 2.746678 |
| 2.75     | 1152.51 | 2.75       | 1152.51 | 2.75     | 1152.51 | 2.75     | 1152.51 | 2.75     |
| 2.756678 | 1152.51 | 2.756678</ |         |          |         |          |         |          |



|          |         |          |         |          |         |          |         |          |
|----------|---------|----------|---------|----------|---------|----------|---------|----------|
| 2.8      | 1152.51 | 2.8      | 1152.51 | 2.8      | 1152.51 | 2.8      | 1152.51 | 2.8      |
| 2.806678 | 1152.51 | 2.806678 | 1152.51 | 2.806678 | 1152.51 | 2.806678 | 1152.51 | 2.806678 |
| 2.81     | 1152.51 | 2.81     | 1152.51 | 2.81     | 1152.51 | 2.81     | 1152.51 | 2.81     |
| 2.816678 | 1152.51 | 2.816678 | 1152.51 | 2.816678 | 1152.51 | 2.816678 | 1152.51 | 2.816678 |
| 2.82     | 1152.51 | 2.82     | 1152.51 | 2.82     | 1152.51 | 2.82     | 1152.51 | 2.82     |
| 2.826678 | 1152.51 | 2.826678 | 1152.51 | 2.826678 | 1152.51 | 2.826678 | 1152.51 | 2.826678 |
| 2.83     | 1152.51 | 2.83     | 1152.51 | 2.83     | 1152.51 | 2.83     | 1152.51 | 2.83     |
| 2.836678 | 1152.51 | 2.836678 | 1152.51 | 2.836678 | 1152.51 | 2.836678 | 1152.51 | 2.836678 |
| 2.84     | 1152.51 | 2.84     | 1152.51 | 2.84     | 1152.51 | 2.84     | 1152.51 | 2.84     |
| 2.846678 | 1152.51 | 2.846678 | 1152.51 | 2.846678 | 1152.51 | 2.846678 | 1152.51 | 2.846678 |
| 2.85     | 1152.51 | 2.85     | 1152.51 | 2.85     | 1152.51 | 2.85     | 1152.51 | 2.85     |
| 2.856678 | 1152.51 | 2.856678 | 1152.51 | 2.856678 | 1152.51 | 2.856678 | 1152.51 | 2.856678 |
| 2.86     | 1152.51 | 2.86     | 1152.51 | 2.86     | 1152.51 | 2.86     | 1152.51 | 2.86     |
| 2.866678 | 1152.51 | 2.866678 | 1152.51 | 2.866678 | 1152.51 | 2.866678 | 1152.51 | 2.866678 |
| 2.87     | 1152.51 | 2.87     | 1152.51 | 2.87     | 1152.51 | 2.87     | 1152.51 | 2.87     |
| 2.876678 | 1152.51 | 2.876678 | 1152.51 | 2.876678 | 1152.51 | 2.876678 | 1152.51 | 2.876678 |
| 2.88     | 1152.51 | 2.88     | 1152.51 | 2.88     | 1152.51 | 2.88     | 1152.51 | 2.88     |
| 2.886678 | 1152.51 | 2.886678 | 1152.51 | 2.886678 | 1152.51 | 2.886678 | 1152.51 | 2.886678 |
| 2.89     | 1152.51 | 2.89     | 1152.51 | 2.89     | 1152.51 | 2.89     | 1152.51 | 2.89     |
| 2.896678 | 1152.51 | 2.896678 | 1152.51 | 2.896678 | 1152.51 | 2.896678 | 1152.51 | 2.896678 |
| 2.9      | 1152.51 | 2.9      | 1152.51 | 2.9      | 1152.51 | 2.9      | 1152.51 | 2.9      |
| 2.906678 | 1152.51 | 2.906678 | 1152.51 | 2.906678 | 1152.51 | 2.906678 | 1152.51 | 2.906678 |
| 2.91     | 1152.51 | 2.91     | 1152.51 | 2.91     | 1152.51 | 2.91     | 1152.51 | 2.91     |
| 2.916678 | 1152.51 | 2.916678 | 1152.51 | 2.916678 | 1152.51 | 2.916678 | 1152.51 | 2.916678 |
| 2.92     | 1152.51 | 2.92     | 1152.51 | 2.92     | 1152.51 | 2.92     | 1152.51 | 2.92     |
| 2.926678 | 1152.51 | 2.926678 | 1152.51 | 2.926678 | 1152.51 | 2.926678 | 1152.51 | 2.926678 |
| 2.93     | 1152.51 | 2.93     | 1152.51 | 2.93     | 1152.51 | 2.93     | 1152.51 | 2.93     |
| 2.936678 | 1152.51 | 2.936678 | 1152.51 | 2.936678 | 1152.51 | 2.936678 | 1152.51 | 2.936678 |
| 2.94     | 1152.51 | 2.94     | 1152.51 | 2.94     | 1152.51 | 2.94     | 1152.51 | 2.94     |
| 2.946678 | 1152.51 | 2.946678 | 1152.51 | 2.946678 | 1152.51 | 2.946678 | 1152.51 | 2.946678 |
| 2.95     | 1152.51 | 2.95     | 1152.51 | 2.95     | 1152.51 | 2.95     | 1152.51 | 2.95     |
| 2.956678 | 1152.51 | 2.956678 | 1152.51 | 2.956678 | 1152.51 | 2.956678 | 1152.51 | 2.956678 |
| 2.96     | 1152.51 | 2.96     | 1152.51 | 2.96     | 1152.51 | 2.96     | 1152.51 | 2.96     |
| 2.966678 | 1152.51 | 2.966678 | 1152.51 | 2.966678 | 1152.51 | 2.966678 | 1152.51 | 2.966678 |
| 2.97     | 1152.51 | 2.97     | 1152.51 | 2.97     | 1152.51 | 2.97     | 1152.51 | 2.97     |
| 2.976678 | 1152.51 | 2.976678 | 1152.51 | 2.976678 | 1152.51 | 2.976678 | 1152.51 | 2.976678 |
| 2.98     | 1152.51 | 2.98     | 1152.51 | 2.98     | 1152.51 | 2.98     | 1152.51 | 2.98     |
| 2.986678 | 1152.51 | 2.986678 | 1152.51 | 2.986678 | 1152.51 | 2.986678 | 1152.51 | 2.986678 |
| 2.99     | 1152.51 | 2.99     | 1152    |          |         |          |         |          |

|          |         |            |         |          |         |          |         |          |
|----------|---------|------------|---------|----------|---------|----------|---------|----------|
| 3.036678 | 1152.51 | 3.036678   | 1152.51 | 3.036678 | 1152.51 | 3.036678 | 1152.51 | 3.036678 |
| 3.04     | 1152.51 | 3.04       | 1152.51 | 3.04     | 1152.51 | 3.04     | 1152.51 | 3.04     |
| 3.046678 | 1152.51 | 3.046678   | 1152.51 | 3.046678 | 1152.51 | 3.046678 | 1152.51 | 3.046678 |
| 3.05     | 1152.51 | 3.05       | 1152.51 | 3.05     | 1152.51 | 3.05     | 1152.51 | 3.05     |
| 3.056678 | 1152.51 | 3.056678   | 1152.51 | 3.056678 | 1152.51 | 3.056678 | 1152.51 | 3.056678 |
| 3.06     | 1152.51 | 3.06       | 1152.51 | 3.06     | 1152.51 | 3.06     | 1152.51 | 3.06     |
| 3.066678 | 1152.51 | 3.066678   | 1152.51 | 3.066678 | 1152.51 | 3.066678 | 1152.51 | 3.066678 |
| 3.07     | 1152.51 | 3.07       | 1152.51 | 3.07     | 1152.51 | 3.07     | 1152.51 | 3.07     |
| 3.076678 | 1152.51 | 3.076678   | 1152.51 | 3.076678 | 1152.51 | 3.076678 | 1152.51 | 3.076678 |
| 3.08     | 1152.51 | 3.08       | 1152.51 | 3.08     | 1152.51 | 3.08     | 1152.51 | 3.08     |
| 3.086678 | 1152.51 | 3.086678   | 1152.51 | 3.086678 | 1152.51 | 3.086678 | 1152.51 | 3.086678 |
| 3.09     | 1152.51 | 3.09       | 1152.51 | 3.09     | 1152.51 | 3.09     | 1152.51 | 3.09     |
| 3.096678 | 1152.51 | 3.096678   | 1152.51 | 3.096678 | 1152.51 | 3.096678 | 1152.51 | 3.096678 |
| 3.1      | 1152.51 | 3.1        | 1152.51 | 3.1      | 1152.51 | 3.1      | 1152.51 | 3.1      |
| 3.106678 | 1152.51 | 3.106678   | 1152.51 | 3.106678 | 1152.51 | 3.106678 | 1152.51 | 3.106678 |
| 3.11     | 1152.51 | 3.11       | 1152.51 | 3.11     | 1152.51 | 3.11     | 1152.51 | 3.11     |
| 3.116678 | 1152.51 | 3.116678   | 1152.51 | 3.116678 | 1152.51 | 3.116678 | 1152.51 | 3.116678 |
| 3.12     | 1152.51 | 3.12       | 1152.51 | 3.12     | 1152.51 | 3.12     | 1152.51 | 3.12     |
| 3.126678 | 1152.51 | 3.126678   | 1152.51 | 3.126678 | 1152.51 | 3.126678 | 1152.51 | 3.126678 |
| 3.13     | 1152.51 | 3.13       | 1152.51 | 3.13     | 1152.51 | 3.13     | 1152.51 | 3.13     |
| 3.136678 | 1152.51 | 3.136678   | 1152.51 | 3.136678 | 1152.51 | 3.136678 | 1152.51 | 3.136678 |
| 3.14     | 1152.51 | 3.14       | 1152.51 | 3.14     | 1152.51 | 3.14     | 1152.51 | 3.14     |
| 3.146678 | 1152.51 | 3.146678   | 1152.51 | 3.146678 | 1152.51 | 3.146678 | 1152.51 | 3.146678 |
| 3.15     | 1152.51 | 3.15       | 1152.51 | 3.15     | 1152.51 | 3.15     | 1152.51 | 3.15     |
| 3.156678 | 1152.51 | 3.156678   | 1152.51 | 3.156678 | 1152.51 | 3.156678 | 1152.51 | 3.156678 |
| 3.16     | 1152.51 | 3.16       | 1152.51 | 3.16     | 1152.51 | 3.16     | 1152.51 | 3.16     |
| 3.166678 | 1152.51 | 3.166678   | 1152.51 | 3.166678 | 1152.51 | 3.166678 | 1152.51 | 3.166678 |
| 3.17     | 1152.51 | 3.17       | 1152.51 | 3.17     | 1152.51 | 3.17     | 1152.51 | 3.17     |
| 3.176678 | 1152.51 | 3.176678   | 1152.51 | 3.176678 | 1152.51 | 3.176678 | 1152.51 | 3.176678 |
| 3.18     | 1152.51 | 3.18       | 1152.51 | 3.18     | 1152.51 | 3.18     | 1152.51 | 3.18     |
| 3.186678 | 1152.51 | 3.186678   | 1152.51 | 3.186678 | 1152.51 | 3.186678 | 1152.51 | 3.186678 |
| 3.19     | 1152.51 | 3.19       | 1152.51 | 3.19     | 1152.51 | 3.19     | 1152.51 | 3.19     |
| 3.196678 | 1152.51 | 3.196678   | 1152.51 | 3.196678 | 1152.51 | 3.196678 | 1152.51 | 3.196678 |
| 3.2      | 1152.51 | 3.2        | 1152.51 | 3.2      | 1152.51 | 3.2      | 1152.51 | 3.2      |
| 3.206678 | 1152.51 | 3.206678   | 1152.51 | 3.206678 | 1152.51 | 3.206678 | 1152.51 | 3.206678 |
| 3.21     | 1152.51 | 3.21       | 1152.51 | 3.21     | 1152.51 | 3.21     | 1152.51 | 3.21     |
| 3.216678 | 1152.51 | 3.216678   | 1152.51 | 3.216678 | 1152.51 | 3.216678 | 1152.51 | 3.216678 |
| 3.22     | 1152.51 | 3.22       | 1152.51 | 3.22     | 1152.51 | 3.22     | 1152.51 | 3.22     |
| 3.226678 | 1152.51 | 3.226678</ |         |          |         |          |         |          |

|          |         |          |         |          |         |          |         |          |
|----------|---------|----------|---------|----------|---------|----------|---------|----------|
| 3.27     | 1152.51 | 3.27     | 1152.51 | 3.27     | 1152.51 | 3.27     | 1152.51 | 3.27     |
| 3.276678 | 1152.51 | 3.276678 | 1152.51 | 3.276678 | 1152.51 | 3.276678 | 1152.51 | 3.276678 |
| 3.28     | 1152.51 | 3.28     | 1152.51 | 3.28     | 1152.51 | 3.28     | 1152.51 | 3.28     |
| 3.286678 | 1152.51 | 3.286678 | 1152.51 | 3.286678 | 1152.51 | 3.286678 | 1152.51 | 3.286678 |
| 3.29     | 1152.51 | 3.29     | 1152.51 | 3.29     | 1152.51 | 3.29     | 1152.51 | 3.29     |
| 3.296678 | 1152.51 | 3.296678 | 1152.51 | 3.296678 | 1152.51 | 3.296678 | 1152.51 | 3.296678 |
| 3.3      | 1152.51 | 3.3      | 1152.51 | 3.3      | 1152.51 | 3.3      | 1152.51 | 3.3      |
| 3.306678 | 1152.51 | 3.306678 | 1152.51 | 3.306678 | 1152.51 | 3.306678 | 1152.51 | 3.306678 |
| 3.31     | 1152.51 | 3.31     | 1152.51 | 3.31     | 1152.51 | 3.31     | 1152.51 | 3.31     |
| 3.316678 | 1152.51 | 3.316678 | 1152.51 | 3.316678 | 1152.51 | 3.316678 | 1152.51 | 3.316678 |
| 3.32     | 1152.51 | 3.32     | 1152.51 | 3.32     | 1152.51 | 3.32     | 1152.51 | 3.32     |
| 3.326678 | 1152.51 | 3.326678 | 1152.51 | 3.326678 | 1152.51 | 3.326678 | 1152.51 | 3.326678 |
| 3.33     | 1152.51 | 3.33     | 1152.51 | 3.33     | 1152.51 | 3.33     | 1152.51 | 3.33     |
| 3.336678 | 1152.51 | 3.336678 | 1152.51 | 3.336678 | 1152.51 | 3.336678 | 1152.51 | 3.336678 |
| 3.34     | 1152.51 | 3.34     | 1152.51 | 3.34     | 1152.51 | 3.34     | 1152.51 | 3.34     |
| 3.346678 | 1152.51 | 3.346678 | 1152.51 | 3.346678 | 1152.51 | 3.346678 | 1152.51 | 3.346678 |
| 3.35     | 1152.51 | 3.35     | 1152.51 | 3.35     | 1152.51 | 3.35     | 1152.51 | 3.35     |
| 3.356678 | 1152.51 | 3.356678 | 1152.51 | 3.356678 | 1152.51 | 3.356678 | 1152.51 | 3.356678 |
| 3.36     | 1152.51 | 3.36     | 1152.51 | 3.36     | 1152.51 | 3.36     | 1152.51 | 3.36     |
| 3.366678 | 1152.51 | 3.366678 | 1152.51 | 3.366678 | 1152.51 | 3.366678 | 1152.51 | 3.366678 |
| 3.37     | 1152.51 | 3.37     | 1152.51 | 3.37     | 1152.51 | 3.37     | 1152.51 | 3.37     |
| 3.376678 | 1152.51 | 3.376678 | 1152.51 | 3.376678 | 1152.51 | 3.376678 | 1152.51 | 3.376678 |
| 3.38     | 1152.51 | 3.38     | 1152.51 | 3.38     | 1152.51 | 3.38     | 1152.51 | 3.38     |
| 3.386678 | 1152.51 | 3.386678 | 1152.51 | 3.386678 | 1152.51 | 3.386678 | 1152.51 | 3.386678 |
| 3.39     | 1152.51 | 3.39     | 1152.51 | 3.39     | 1152.51 | 3.39     | 1152.51 | 3.39     |
| 3.396678 | 1152.51 | 3.396678 | 1152.51 | 3.396678 | 1152.51 | 3.396678 | 1152.51 | 3.396678 |
| 3.4      | 1152.51 | 3.4      | 1152.51 | 3.4      | 1152.51 | 3.4      | 1152.51 | 3.4      |
| 3.406678 | 1152.51 | 3.406678 | 1152.51 | 3.406678 | 1152.51 | 3.406678 | 1152.51 | 3.406678 |
| 3.41     | 1152.51 | 3.41     | 1152.51 | 3.41     | 1152.51 | 3.41     | 1152.51 | 3.41     |
| 3.416678 | 1152.51 | 3.416678 | 1152.51 | 3.416678 | 1152.51 | 3.416678 | 1152.51 | 3.416678 |
| 3.42     | 1152.51 | 3.42     | 1152.51 | 3.42     | 1152.51 | 3.42     | 1152.51 | 3.42     |
| 3.426678 | 1152.51 | 3.426678 | 1152.51 | 3.426678 | 1152.51 | 3.426678 | 1152.51 | 3.426678 |
| 3.43     | 1152.51 | 3.43     | 1152.51 | 3.43     | 1152.51 | 3.43     | 1152.51 | 3.43     |
| 3.436678 | 1152.51 | 3.436678 | 1152.51 | 3.436678 | 1152.51 | 3.436678 | 1152.51 | 3.436678 |
| 3.44     | 1152.51 | 3.44     | 1152.51 | 3.44     | 1152.51 | 3.44     | 1152.51 | 3.44     |
| 3.446678 | 1152.51 | 3.446678 | 1152.51 | 3.446678 | 1152.51 | 3.446678 | 1152.51 | 3.446678 |
| 3.45     | 1152.51 | 3.45     | 1152.51 | 3.45     | 1152.51 | 3.45     | 1152.51 | 3.45     |
| 3.456678 | 1152.51 | 3.456678 | 1152.51 | 3.456678 | 1152.51 | 3.456678 | 1152.51 | 3.456678 |
| 3.46     | 1152.51 | 3.46     | 1152    |          |         |          |         |          |

|          |         |          |         |          |         |          |         |          |
|----------|---------|----------|---------|----------|---------|----------|---------|----------|
| 3.506678 | 1152.51 | 3.506678 | 1152.51 | 3.506678 | 1152.51 | 3.506678 | 1152.51 | 3.506678 |
| 3.51     | 1152.51 | 3.51     | 1152.51 | 3.51     | 1152.51 | 3.51     | 1152.51 | 3.51     |
| 3.516678 | 1152.51 | 3.516678 | 1152.51 | 3.516678 | 1152.51 | 3.516678 | 1152.51 | 3.516678 |
| 3.52     | 1152.51 | 3.52     | 1152.51 | 3.52     | 1152.51 | 3.52     | 1152.51 | 3.52     |
| 3.526678 | 1152.51 | 3.526678 | 1152.51 | 3.526678 | 1152.51 | 3.526678 | 1152.51 | 3.526678 |
| 3.53     | 1152.51 | 3.53     | 1152.51 | 3.53     | 1152.51 | 3.53     | 1152.51 | 3.53     |
| 3.536678 | 1152.51 | 3.536678 | 1152.51 | 3.536678 | 1152.51 | 3.536678 | 1152.51 | 3.536678 |
| 3.54     | 1152.51 | 3.54     | 1152.51 | 3.54     | 1152.51 | 3.54     | 1152.51 | 3.54     |
| 3.546678 | 1152.51 | 3.546678 | 1152.51 | 3.546678 | 1152.51 | 3.546678 | 1152.51 | 3.546678 |
| 3.55     | 1152.51 | 3.55     | 1152.51 | 3.55     | 1152.51 | 3.55     | 1152.51 | 3.55     |
| 3.556678 | 1152.51 | 3.556678 | 1152.51 | 3.556678 | 1152.51 | 3.556678 | 1152.51 | 3.556678 |
| 3.56     | 1152.51 | 3.56     | 1152.51 | 3.56     | 1152.51 | 3.56     | 1152.51 | 3.56     |
| 3.566678 | 1152.51 | 3.566678 | 1152.51 | 3.566678 | 1152.51 | 3.566678 | 1152.51 | 3.566678 |
| 3.57     | 1152.51 | 3.57     | 1152.51 | 3.57     | 1152.51 | 3.57     | 1152.51 | 3.57     |
| 3.576678 | 1152.51 | 3.576678 | 1152.51 | 3.576678 | 1152.51 | 3.576678 | 1152.51 | 3.576678 |
| 3.58     | 1152.51 | 3.58     | 1152.51 | 3.58     | 1152.51 | 3.58     | 1152.51 | 3.58     |
| 3.586678 | 1152.51 | 3.586678 | 1152.51 | 3.586678 | 1152.51 | 3.586678 | 1152.51 | 3.586678 |
| 3.59     | 1152.51 | 3.59     | 1152.51 | 3.59     | 1152.51 | 3.59     | 1152.51 | 3.59     |
| 3.596678 | 1152.51 | 3.596678 | 1152.51 | 3.596678 | 1152.51 | 3.596678 | 1152.51 | 3.596678 |
| 3.6      | 1152.51 | 3.6      | 1152.51 | 3.6      | 1152.51 | 3.6      | 1152.51 | 3.6      |
| 3.606678 | 1152.51 | 3.606678 | 1152.51 | 3.606678 | 1152.51 | 3.606678 | 1152.51 | 3.606678 |
| 3.61     | 1152.51 | 3.61     | 1152.51 | 3.61     | 1152.51 | 3.61     | 1152.51 | 3.61     |
| 3.616678 | 1152.51 | 3.616678 | 1152.51 | 3.616678 | 1152.51 | 3.616678 | 1152.51 | 3.616678 |
| 3.62     | 1152.51 | 3.62     | 1152.51 | 3.62     | 1152.51 | 3.62     | 1152.51 | 3.62     |
| 3.626678 | 1152.51 | 3.626678 | 1152.51 | 3.626678 | 1152.51 | 3.626678 | 1152.51 | 3.626678 |
| 3.63     | 1152.51 | 3.63     | 1152.51 | 3.63     | 1152.51 | 3.63     | 1152.51 | 3.63     |
| 3.636678 | 1152.51 | 3.636678 | 1152.51 | 3.636678 | 1152.51 | 3.636678 | 1152.51 | 3.636678 |
| 3.64     | 1152.51 | 3.64     | 1152.51 | 3.64     | 1152.51 | 3.64     | 1152.51 | 3.64     |
| 3.646678 | 1152.51 | 3.646678 | 1152.51 | 3.646678 | 1152.51 | 3.646678 | 1152.51 | 3.646678 |
| 3.65     | 1152.51 | 3.65     | 1152.51 | 3.65     | 1152.51 | 3.65     | 1152.51 | 3.65     |
| 3.656678 | 1152.51 | 3.656678 | 1152.51 | 3.656678 | 1152.51 | 3.656678 | 1152.51 | 3.656678 |
| 3.66     | 1152.51 | 3.66     | 1152.51 | 3.66     | 1152.51 | 3.66     | 1152.51 | 3.66     |
| 3.666678 | 1152.51 | 3.666678 | 1152.51 | 3.666678 | 1152.51 | 3.666678 | 1152.51 | 3.666678 |
| 3.67     | 1152.51 | 3.67     | 1152.51 | 3.67     | 1152.51 | 3.67     | 1152.51 | 3.67     |
| 3.676678 | 1152.51 | 3.676678 | 1152.51 | 3.676678 | 1152.51 | 3.676678 | 1152.51 | 3.676678 |
| 3.68     | 1152.51 | 3.68     | 1152.51 | 3.68     | 1152.51 | 3.68     | 1152.51 | 3.68     |
| 3.686678 | 1152.51 | 3.686678 | 1152.51 | 3.686678 | 1152.51 | 3.686678 | 1152.51 | 3.686678 |
| 3.69     | 1152.51 | 3.69     | 1152.51 | 3.69     | 1152.51 | 3.69     | 1152.51 | 3.69     |
| 3.696678 | 1152.51 | 3.696678 | 1152.51 | 3.696678 | 1152.51 | 3.696678 | 1152.51 | 3.696678 |
| 3.7      | 1152.51 | 3.7      | 1152.51 | 3.7      | 1152.51 | 3.7      | 1152.51 | 3.7      |
| 3.706678 | 1152.51 | 3.706678 | 1152.51 | 3.706678 | 1152.51 | 3.706678 | 1152.51 | 3.706678 |
| 3.71     | 1152.51 | 3.71     | 1152.51 | 3.71     | 1152.51 | 3.71     | 1152.51 | 3.71     |
| 3.716678 | 1152.51 | 3.716678 | 1152.51 | 3.716678 | 1152.51 | 3.716678 | 1152.51 | 3.716678 |
| 3.72     | 1152.51 | 3.72     | 1152.51 | 3.72     | 1152.51 | 3.72     | 1152.51 | 3.72     |
| 3.726678 | 1152.51 | 3.726678 | 1152.51 | 3.726678 | 1152.51 | 3.726678 | 1152.51 | 3.726678 |
| 3.73     | 1152.51 | 3.73     | 1152.51 | 3.73     | 1152.51 | 3.73     | 1152.51 | 3.73     |
| 3.736678 | 1152.51 | 3.736678 | 1152.51 | 3.736678 | 1152.51 | 3.736678 | 1152.51 | 3.736678 |

|          |         |          |         |          |         |          |         |          |
|----------|---------|----------|---------|----------|---------|----------|---------|----------|
| 3.74     | 1152.51 | 3.74     | 1152.51 | 3.74     | 1152.51 | 3.74     | 1152.51 | 3.74     |
| 3.746678 | 1152.51 | 3.746678 | 1152.51 | 3.746678 | 1152.51 | 3.746678 | 1152.51 | 3.746678 |
| 3.75     | 1152.51 | 3.75     | 1152.51 | 3.75     | 1152.51 | 3.75     | 1152.51 | 3.75     |
| 3.756678 | 1152.51 | 3.756678 | 1152.51 | 3.756678 | 1152.51 | 3.756678 | 1152.51 | 3.756678 |
| 3.76     | 1152.51 | 3.76     | 1152.51 | 3.76     | 1152.51 | 3.76     | 1152.51 | 3.76     |
| 3.766678 | 1152.51 | 3.766678 | 1152.51 | 3.766678 | 1152.51 | 3.766678 | 1152.51 | 3.766678 |
| 3.77     | 1152.51 | 3.77     | 1152.51 | 3.77     | 1152.51 | 3.77     | 1152.51 | 3.77     |
| 3.776678 | 1152.51 | 3.776678 | 1152.51 | 3.776678 | 1152.51 | 3.776678 | 1152.51 | 3.776678 |
| 3.78     | 1152.51 | 3.78     | 1152.51 | 3.78     | 1152.51 | 3.78     | 1152.51 | 3.78     |
| 3.786678 | 1152.51 | 3.786678 | 1152.51 | 3.786678 | 1152.51 | 3.786678 | 1152.51 | 3.786678 |
| 3.79     | 1152.51 | 3.79     | 1152.51 | 3.79     | 1152.51 | 3.79     | 1152.51 | 3.79     |
| 3.796678 | 1152.51 | 3.796678 | 1152.51 | 3.796678 | 1152.51 | 3.796678 | 1152.51 | 3.796678 |
| 3.8      | 1152.51 | 3.8      | 1152.51 | 3.8      | 1152.51 | 3.8      | 1152.51 | 3.8      |
| 3.806678 | 1152.51 | 3.806678 | 1152.51 | 3.806678 | 1152.51 | 3.806678 | 1152.51 | 3.806678 |
| 3.81     | 1152.51 | 3.81     | 1152.51 | 3.81     | 1152.51 | 3.81     | 1152.51 | 3.81     |
| 3.816678 | 1152.51 | 3.816678 | 1152.51 | 3.816678 | 1152.51 | 3.816678 | 1152.51 | 3.816678 |
| 3.82     | 1152.51 | 3.82     | 1152.51 | 3.82     | 1152.51 | 3.82     | 1152.51 | 3.82     |
| 3.826678 | 1152.51 | 3.826678 | 1152.51 | 3.826678 | 1152.51 | 3.826678 | 1152.51 | 3.826678 |
| 3.83     | 1152.51 | 3.83     | 1152.51 | 3.83     | 1152.51 | 3.83     | 1152.51 | 3.83     |
| 3.836678 | 1152.51 | 3.836678 | 1152.51 | 3.836678 | 1152.51 | 3.836678 | 1152.51 | 3.836678 |
| 3.84     | 1152.51 | 3.84     | 1152.51 | 3.84     | 1152.51 | 3.84     | 1152.51 | 3.84     |
| 3.846678 | 1152.51 | 3.846678 | 1152.51 | 3.846678 | 1152.51 | 3.846678 | 1152.51 | 3.846678 |
| 3.85     | 1152.51 | 3.85     | 1152.51 | 3.85     | 1152.51 | 3.85     | 1152.51 | 3.85     |
| 3.856678 | 1152.51 | 3.856678 | 1152.51 | 3.856678 | 1152.51 | 3.856678 | 1152.51 | 3.856678 |
| 3.86     | 1152.51 | 3.86     | 1152.51 | 3.86     | 1152.51 | 3.86     | 1152.51 | 3.86     |
| 3.866678 | 1152.51 | 3.866678 | 1152.51 | 3.866678 | 1152.51 | 3.866678 | 1152.51 | 3.866678 |
| 3.87     | 1152.51 | 3.87     | 1152.51 | 3.87     | 1152.51 | 3.87     | 1152.51 | 3.87     |
| 3.876678 | 1152.51 | 3.876678 | 1152.51 | 3.876678 | 1152.51 | 3.876678 | 1152.51 | 3.876678 |
| 3.88     | 1152.51 | 3.88     | 1152.51 | 3.88     | 1152.51 | 3.88     | 1152.51 | 3.88     |
| 3.886678 | 1152.51 | 3.886678 | 1152.51 | 3.886678 | 1152.51 | 3.886678 | 1152.51 | 3.886678 |
| 3.89     | 1152.51 | 3.89     | 1152.51 | 3.89     | 1152.51 | 3.89     | 1152.51 | 3.89     |
| 3.896678 | 1152.51 | 3.896678 | 1152.51 | 3.896678 | 1152.51 | 3.896678 | 1152.51 | 3.896678 |
| 3.9      | 1152.51 | 3.9      | 1152.51 | 3.9      | 1152.51 | 3.9      | 1152.51 | 3.9      |
| 3.906678 | 1152.51 | 3.906678 | 1152.51 | 3.906678 | 1152.51 | 3.906678 | 1152.51 | 3.906678 |
| 3.91     | 1152.51 | 3.91     | 1152.51 | 3.91     | 1152.51 | 3.91     | 1152.51 | 3.91     |
| 3.916678 | 1152.51 | 3.916678 | 1152.51 | 3.916678 | 1152.51 | 3.916678 | 1152.51 | 3.916678 |
| 3.92     | 1152.51 | 3.92     | 1152.51 | 3.92     | 1152.51 | 3.92     | 1152.51 | 3.92     |
| 3.926678 | 1152.51 | 3.926678 | 1152.51 | 3.926678 | 1152.51 | 3.926678 | 1152.51 | 3.926678 |
| 3.93     | 1152.51 | 3.93     | 1152    |          |         |          |         |          |

|          |         |          |         |          |         |          |         |          |
|----------|---------|----------|---------|----------|---------|----------|---------|----------|
| 3.976678 | 1152.51 | 3.976678 | 1152.51 | 3.976678 | 1152.51 | 3.976678 | 1152.51 | 3.976678 |
| 3.98     | 1152.51 | 3.98     | 1152.51 | 3.98     | 1152.51 | 3.98     | 1152.51 | 3.98     |
| 3.986678 | 1152.51 | 3.986678 | 1152.51 | 3.986678 | 1152.51 | 3.986678 | 1152.51 | 3.986678 |
| 3.99     | 1152.51 | 3.99     | 1152.51 | 3.99     | 1152.51 | 3.99     | 1152.51 | 3.99     |
| 3.996678 | 1152.51 | 3.996678 | 1152.51 | 3.996678 | 1152.51 | 3.996678 | 1152.51 | 3.996678 |
| 4        | 1152.51 | 4        | 1152.51 | 4        | 1152.51 | 4        | 1152.51 | 4        |
| 4.006678 | 1152.51 | 4.006678 | 1152.51 | 4.006678 | 1152.51 | 4.006678 | 1152.51 | 4.006678 |
| 4.01     | 1152.51 | 4.01     | 1152.51 | 4.01     | 1152.51 | 4.01     | 1152.51 | 4.01     |
| 4.016678 | 1152.51 | 4.016678 | 1152.51 | 4.016678 | 1152.51 | 4.016678 | 1152.51 | 4.016678 |
| 4.02     | 1152.51 | 4.02     | 1152.51 | 4.02     | 1152.51 | 4.02     | 1152.51 | 4.02     |
| 4.026678 | 1152.51 | 4.026678 | 1152.51 | 4.026678 | 1152.51 | 4.026678 | 1152.51 | 4.026678 |
| 4.03     | 1152.51 | 4.03     | 1152.51 | 4.03     | 1152.51 | 4.03     | 1152.51 | 4.03     |
| 4.036678 | 1152.51 | 4.036678 | 1152.51 | 4.036678 | 1152.51 | 4.036678 | 1152.51 | 4.036678 |
| 4.04     | 1152.51 | 4.04     | 1152.51 | 4.04     | 1152.51 | 4.04     | 1152.51 | 4.04     |
| 4.046678 | 1152.51 | 4.046678 | 1152.51 | 4.046678 | 1152.51 | 4.046678 | 1152.51 | 4.046678 |
| 4.05     | 1152.51 | 4.05     | 1152.51 | 4.05     | 1152.51 | 4.05     | 1152.51 | 4.05     |
| 4.056678 | 1152.51 | 4.056678 | 1152.51 | 4.056678 | 1152.51 | 4.056678 | 1152.51 | 4.056678 |
| 4.06     | 1152.51 | 4.06     | 1152.51 | 4.06     | 1152.51 | 4.06     | 1152.51 | 4.06     |
| 4.066678 | 1152.51 | 4.066678 | 1152.51 | 4.066678 | 1152.51 | 4.066678 | 1152.51 | 4.066678 |
| 4.07     | 1152.51 | 4.07     | 1152.51 | 4.07     | 1152.51 | 4.07     | 1152.51 | 4.07     |
| 4.076678 | 1152.51 | 4.076678 | 1152.51 | 4.076678 | 1152.51 | 4.076678 | 1152.51 | 4.076678 |
| 4.08     | 1152.51 | 4.08     | 1152.51 | 4.08     | 1152.51 | 4.08     | 1152.51 | 4.08     |
| 4.086678 | 1152.51 | 4.086678 | 1152.51 | 4.086678 | 1152.51 | 4.086678 | 1152.51 | 4.086678 |
| 4.09     | 1152.51 | 4.09     | 1152.51 | 4.09     | 1152.51 | 4.09     | 1152.51 | 4.09     |
| 4.096678 | 1152.51 | 4.096678 | 1152.51 | 4.096678 | 1152.51 | 4.096678 | 1152.51 | 4.096678 |
| 4.1      | 1152.51 | 4.1      | 1152.51 | 4.1      | 1152.51 | 4.1      | 1152.51 | 4.1      |
| 4.106678 | 1152.51 | 4.106678 | 1152.51 | 4.106678 | 1152.51 | 4.106678 | 1152.51 | 4.106678 |
| 4.11     | 1152.51 | 4.11     | 1152.51 | 4.11     | 1152.51 | 4.11     | 1152.51 | 4.11     |
| 4.116678 | 1152.51 | 4.116678 | 1152.51 | 4.116678 | 1152.51 | 4.116678 | 1152.51 | 4.116678 |
| 4.12     | 1152.51 | 4.12     | 1152.51 | 4.12     | 1152.51 | 4.12     | 1152.51 | 4.12     |
| 4.126678 | 1152.51 | 4.126678 | 1152.51 | 4.126678 | 1152.51 | 4.126678 | 1152.51 | 4.126678 |
| 4.13     | 1152.51 | 4.13     | 1152.51 | 4.13     | 1152.51 | 4.13     | 1152.51 | 4.13     |
| 4.136678 | 1152.51 | 4.136678 | 1152.51 | 4.136678 | 1152.51 | 4.136678 | 1152.51 | 4.136678 |
| 4.14     | 1152.51 | 4.14     | 1152.51 | 4.14     | 1152.51 | 4.14     | 1152.51 | 4.14     |
| 4.146678 | 1152.51 | 4.146678 | 1152.51 | 4.146678 | 1152.51 | 4.146678 | 1152.51 | 4.146678 |
| 4.15     | 1152.51 | 4.15     | 1152.51 | 4.15     | 1152.51 | 4.15     | 1152.51 | 4.15     |
| 4.156678 | 1152.51 | 4.156678 | 1152.51 | 4.156678 | 1152.51 | 4.156678 | 1152.51 | 4.156678 |
| 4.16     | 1152.51 | 4.16     | 1152.51 | 4.16     | 1152.51 | 4.16     | 1152.51 | 4.16     |
| 4.166678 | 1152.51 | 4.166678 | 1152.5  |          |         |          |         |          |

|          |         |          |         |          |         |          |         |          |
|----------|---------|----------|---------|----------|---------|----------|---------|----------|
| 4.21     | 1152.51 | 4.21     | 1152.51 | 4.21     | 1152.51 | 4.21     | 1152.51 | 4.21     |
| 4.216678 | 1152.51 | 4.216678 | 1152.51 | 4.216678 | 1152.51 | 4.216678 | 1152.51 | 4.216678 |
| 4.22     | 1152.51 | 4.22     | 1152.51 | 4.22     | 1152.51 | 4.22     | 1152.51 | 4.22     |
| 4.226678 | 1152.51 | 4.226678 | 1152.51 | 4.226678 | 1152.51 | 4.226678 | 1152.51 | 4.226678 |
| 4.23     | 1152.51 | 4.23     | 1152.51 | 4.23     | 1152.51 | 4.23     | 1152.51 | 4.23     |
| 4.236678 | 1152.51 | 4.236678 | 1152.51 | 4.236678 | 1152.51 | 4.236678 | 1152.51 | 4.236678 |
| 4.24     | 1152.51 | 4.24     | 1152.51 | 4.24     | 1152.51 | 4.24     | 1152.51 | 4.24     |
| 4.246678 | 1152.51 | 4.246678 | 1152.51 | 4.246678 | 1152.51 | 4.246678 | 1152.51 | 4.246678 |
| 4.25     | 1152.51 | 4.25     | 1152.51 | 4.25     | 1152.51 | 4.25     | 1152.51 | 4.25     |
| 4.256678 | 1152.51 | 4.256678 | 1152.51 | 4.256678 | 1152.51 | 4.256678 | 1152.51 | 4.256678 |
| 4.26     | 1152.51 | 4.26     | 1152.51 | 4.26     | 1152.51 | 4.26     | 1152.51 | 4.26     |
| 4.266678 | 1152.51 | 4.266678 | 1152.51 | 4.266678 | 1152.51 | 4.266678 | 1152.51 | 4.266678 |
| 4.27     | 1152.51 | 4.27     | 1152.51 | 4.27     | 1152.51 | 4.27     | 1152.51 | 4.27     |
| 4.276678 | 1152.51 | 4.276678 | 1152.51 | 4.276678 | 1152.51 | 4.276678 | 1152.51 | 4.276678 |
| 4.28     | 1152.51 | 4.28     | 1152.51 | 4.28     | 1152.51 | 4.28     | 1152.51 | 4.28     |
| 4.286678 | 1152.51 | 4.286678 | 1152.51 | 4.286678 | 1152.51 | 4.286678 | 1152.51 | 4.286678 |
| 4.29     | 1152.51 | 4.29     | 1152.51 | 4.29     | 1152.51 | 4.29     | 1152.51 | 4.29     |
| 4.296678 | 1152.51 | 4.296678 | 1152.51 | 4.296678 | 1152.51 | 4.296678 | 1152.51 | 4.296678 |
| 4.3      | 1152.51 | 4.3      | 1152.51 | 4.3      | 1152.51 | 4.3      | 1152.51 | 4.3      |
| 4.306678 | 1152.51 | 4.306678 | 1152.51 | 4.306678 | 1152.51 | 4.306678 | 1152.51 | 4.306678 |
| 4.31     | 1152.51 | 4.31     | 1152.51 | 4.31     | 1152.51 | 4.31     | 1152.51 | 4.31     |
| 4.316678 | 1152.51 | 4.316678 | 1152.51 | 4.316678 | 1152.51 | 4.316678 | 1152.51 | 4.316678 |
| 4.32     | 1152.51 | 4.32     | 1152.51 | 4.32     | 1152.51 | 4.32     | 1152.51 | 4.32     |
| 4.326678 | 1152.51 | 4.326678 | 1152.51 | 4.326678 | 1152.51 | 4.326678 | 1152.51 | 4.326678 |
| 4.33     | 1152.51 | 4.33     | 1152.51 | 4.33     | 1152.51 | 4.33     | 1152.51 | 4.33     |
| 4.336678 | 1152.51 | 4.336678 | 1152.51 | 4.336678 | 1152.51 | 4.336678 | 1152.51 | 4.336678 |
| 4.34     | 1152.51 | 4.34     | 1152.51 | 4.34     | 1152.51 | 4.34     | 1152.51 | 4.34     |
| 4.346678 | 1152.51 | 4.346678 | 1152.51 | 4.346678 | 1152.51 | 4.346678 | 1152.51 | 4.346678 |
| 4.35     | 1152.51 | 4.35     | 1152.51 | 4.35     | 1152.51 | 4.35     | 1152.51 | 4.35     |
| 4.356678 | 1152.51 | 4.356678 | 1152.51 | 4.356678 | 1152.51 | 4.356678 | 1152.51 | 4.356678 |
| 4.36     | 1152.51 | 4.36     | 1152.51 | 4.36     | 1152.51 | 4.36     | 1152.51 | 4.36     |
| 4.366678 | 1152.51 | 4.366678 | 1152.51 | 4.366678 | 1152.51 | 4.366678 | 1152.51 | 4.366678 |
| 4.37     | 1152.51 | 4.37     | 1152.51 | 4.37     | 1152.51 | 4.37     | 1152.51 | 4.37     |
| 4.376678 | 1152.51 | 4.376678 | 1152.51 | 4.376678 | 1152.51 | 4.376678 | 1152.51 | 4.376678 |
| 4.38     | 1152.51 | 4.38     | 1152.51 | 4.38     | 1152.51 | 4.38     | 1152.51 | 4.38     |
| 4.386678 | 1152.51 | 4.386678 | 1152.51 | 4.386678 | 1152.51 | 4.386678 | 1152.51 | 4.386678 |
| 4.39     | 1152.51 | 4.39     | 1152.51 | 4.39     | 1152.51 | 4.39     | 1152.51 | 4.39     |
| 4.396678 | 1152.51 | 4.396678 | 1152.51 | 4.396678 | 1152.51 | 4.396678 | 1152.51 | 4.396678 |
| 4.4      | 1152.51 | 4.4      | 1152.51 | 4.4      | 1152.51 | 4.4      | 1152.51 | 4.4      |
| 4.406678 | 1152.51 | 4.406678 | 1152.51 | 4.406678 | 1152.51 | 4.406678 | 1152.51 | 4.406678 |
| 4.41     | 1152.51 | 4.41     | 1152.51 | 4.41     | 1152.51 | 4.41     | 1152.51 | 4.41     |
| 4.416678 | 1152.51 | 4.416678 | 1152.51 | 4.416678 | 1152.51 | 4.416678 | 1152.51 | 4.416678 |
| 4.42     | 1152.51 | 4.42     | 1152.51 | 4.42     | 1152.51 | 4.42     | 1152.51 | 4.42     |
| 4.426678 | 1152.51 | 4.426678 | 1152.51 | 4.426678 | 1152.51 | 4.426678 | 1152.51 | 4.426678 |
| 4.43     | 1152.51 | 4.43     | 1152.51 | 4.43     | 1152.51 | 4.43     | 1152.51 | 4.43     |
| 4.436678 | 1152.51 | 4.436678 | 1152.51 | 4.436678 | 1152.51 | 4.436678 | 1152.51 | 4.436678 |
| 4.44     | 1152.51 | 4.44     | 1152.51 | 4.44     | 1152.51 | 4.44     | 1152.51 | 4.44     |

|          |         |            |         |          |         |          |         |          |
|----------|---------|------------|---------|----------|---------|----------|---------|----------|
| 4.446678 | 1152.51 | 4.446678   | 1152.51 | 4.446678 | 1152.51 | 4.446678 | 1152.51 | 4.446678 |
| 4.45     | 1152.51 | 4.45       | 1152.51 | 4.45     | 1152.51 | 4.45     | 1152.51 | 4.45     |
| 4.456678 | 1152.51 | 4.456678   | 1152.51 | 4.456678 | 1152.51 | 4.456678 | 1152.51 | 4.456678 |
| 4.46     | 1152.51 | 4.46       | 1152.51 | 4.46     | 1152.51 | 4.46     | 1152.51 | 4.46     |
| 4.466678 | 1152.51 | 4.466678   | 1152.51 | 4.466678 | 1152.51 | 4.466678 | 1152.51 | 4.466678 |
| 4.47     | 1152.51 | 4.47       | 1152.51 | 4.47     | 1152.51 | 4.47     | 1152.51 | 4.47     |
| 4.476678 | 1152.51 | 4.476678   | 1152.51 | 4.476678 | 1152.51 | 4.476678 | 1152.51 | 4.476678 |
| 4.48     | 1152.51 | 4.48       | 1152.51 | 4.48     | 1152.51 | 4.48     | 1152.51 | 4.48     |
| 4.486678 | 1152.51 | 4.486678   | 1152.51 | 4.486678 | 1152.51 | 4.486678 | 1152.51 | 4.486678 |
| 4.49     | 1152.51 | 4.49       | 1152.51 | 4.49     | 1152.51 | 4.49     | 1152.51 | 4.49     |
| 4.496678 | 1152.51 | 4.496678   | 1152.51 | 4.496678 | 1152.51 | 4.496678 | 1152.51 | 4.496678 |
| 4.5      | 1152.51 | 4.5        | 1152.51 | 4.5      | 1152.51 | 4.5      | 1152.51 | 4.5      |
| 4.506678 | 1152.51 | 4.506678   | 1152.51 | 4.506678 | 1152.51 | 4.506678 | 1152.51 | 4.506678 |
| 4.51     | 1152.51 | 4.51       | 1152.51 | 4.51     | 1152.51 | 4.51     | 1152.51 | 4.51     |
| 4.516678 | 1152.51 | 4.516678   | 1152.51 | 4.516678 | 1152.51 | 4.516678 | 1152.51 | 4.516678 |
| 4.52     | 1152.51 | 4.52       | 1152.51 | 4.52     | 1152.51 | 4.52     | 1152.51 | 4.52     |
| 4.526678 | 1152.51 | 4.526678   | 1152.51 | 4.526678 | 1152.51 | 4.526678 | 1152.51 | 4.526678 |
| 4.53     | 1152.51 | 4.53       | 1152.51 | 4.53     | 1152.51 | 4.53     | 1152.51 | 4.53     |
| 4.536678 | 1152.51 | 4.536678   | 1152.51 | 4.536678 | 1152.51 | 4.536678 | 1152.51 | 4.536678 |
| 4.54     | 1152.51 | 4.54       | 1152.51 | 4.54     | 1152.51 | 4.54     | 1152.51 | 4.54     |
| 4.546678 | 1152.51 | 4.546678   | 1152.51 | 4.546678 | 1152.51 | 4.546678 | 1152.51 | 4.546678 |
| 4.55     | 1152.51 | 4.55       | 1152.51 | 4.55     | 1152.51 | 4.55     | 1152.51 | 4.55     |
| 4.556678 | 1152.51 | 4.556678   | 1152.51 | 4.556678 | 1152.51 | 4.556678 | 1152.51 | 4.556678 |
| 4.56     | 1152.51 | 4.56       | 1152.51 | 4.56     | 1152.51 | 4.56     | 1152.51 | 4.56     |
| 4.566678 | 1152.51 | 4.566678   | 1152.51 | 4.566678 | 1152.51 | 4.566678 | 1152.51 | 4.566678 |
| 4.57     | 1152.51 | 4.57       | 1152.51 | 4.57     | 1152.51 | 4.57     | 1152.51 | 4.57     |
| 4.576678 | 1152.51 | 4.576678   | 1152.51 | 4.576678 | 1152.51 | 4.576678 | 1152.51 | 4.576678 |
| 4.58     | 1152.51 | 4.58       | 1152.51 | 4.58     | 1152.51 | 4.58     | 1152.51 | 4.58     |
| 4.586678 | 1152.51 | 4.586678   | 1152.51 | 4.586678 | 1152.51 | 4.586678 | 1152.51 | 4.586678 |
| 4.59     | 1152.51 | 4.59       | 1152.51 | 4.59     | 1152.51 | 4.59     | 1152.51 | 4.59     |
| 4.596678 | 1152.51 | 4.596678   | 1152.51 | 4.596678 | 1152.51 | 4.596678 | 1152.51 | 4.596678 |
| 4.6      | 1152.51 | 4.6        | 1152.51 | 4.6      | 1152.51 | 4.6      | 1152.51 | 4.6      |
| 4.606678 | 1152.51 | 4.606678   | 1152.51 | 4.606678 | 1152.51 | 4.606678 | 1152.51 | 4.606678 |
| 4.61     | 1152.51 | 4.61       | 1152.51 | 4.61     | 1152.51 | 4.61     | 1152.51 | 4.61     |
| 4.616678 | 1152.51 | 4.616678   | 1152.51 | 4.616678 | 1152.51 | 4.616678 | 1152.51 | 4.616678 |
| 4.62     | 1152.51 | 4.62       | 1152.51 | 4.62     | 1152.51 | 4.62     | 1152.51 | 4.62     |
| 4.626678 | 1152.51 | 4.626678   | 1152.51 | 4.626678 | 1152.51 | 4.626678 | 1152.51 | 4.626678 |
| 4.63     | 1152.51 | 4.63       | 1152.51 | 4.63     | 1152.51 | 4.63     | 1152.51 | 4.63     |
| 4.636678 | 1152.51 | 4.636678</ |         |          |         |          |         |          |



|          |         |          |         |          |         |          |         |          |
|----------|---------|----------|---------|----------|---------|----------|---------|----------|
| 4.68     | 1152.51 | 4.68     | 1152.51 | 4.68     | 1152.51 | 4.68     | 1152.51 | 4.68     |
| 4.686678 | 1152.51 | 4.686678 | 1152.51 | 4.686678 | 1152.51 | 4.686678 | 1152.51 | 4.686678 |
| 4.69     | 1152.51 | 4.69     | 1152.51 | 4.69     | 1152.51 | 4.69     | 1152.51 | 4.69     |
| 4.696678 | 1152.51 | 4.696678 | 1152.51 | 4.696678 | 1152.51 | 4.696678 | 1152.51 | 4.696678 |
| 4.7      | 1152.51 | 4.7      | 1152.51 | 4.7      | 1152.51 | 4.7      | 1152.51 | 4.7      |
| 4.706678 | 1152.51 | 4.706678 | 1152.51 | 4.706678 | 1152.51 | 4.706678 | 1152.51 | 4.706678 |
| 4.71     | 1152.51 | 4.71     | 1152.51 | 4.71     | 1152.51 | 4.71     | 1152.51 | 4.71     |
| 4.716678 | 1152.51 | 4.716678 | 1152.51 | 4.716678 | 1152.51 | 4.716678 | 1152.51 | 4.716678 |
| 4.72     | 1152.51 | 4.72     | 1152.51 | 4.72     | 1152.51 | 4.72     | 1152.51 | 4.72     |
| 4.726678 | 1152.51 | 4.726678 | 1152.51 | 4.726678 | 1152.51 | 4.726678 | 1152.51 | 4.726678 |
| 4.73     | 1152.51 | 4.73     | 1152.51 | 4.73     | 1152.51 | 4.73     | 1152.51 | 4.73     |
| 4.736678 | 1152.51 | 4.736678 | 1152.51 | 4.736678 | 1152.51 | 4.736678 | 1152.51 | 4.736678 |
| 4.74     | 1152.51 | 4.74     | 1152.51 | 4.74     | 1152.51 | 4.74     | 1152.51 | 4.74     |
| 4.746678 | 1152.51 | 4.746678 | 1152.51 | 4.746678 | 1152.51 | 4.746678 | 1152.51 | 4.746678 |
| 4.75     | 1152.51 | 4.75     | 1152.51 | 4.75     | 1152.51 | 4.75     | 1152.51 | 4.75     |
| 4.756678 | 1152.51 | 4.756678 | 1152.51 | 4.756678 | 1152.51 | 4.756678 | 1152.51 | 4.756678 |
| 4.76     | 1152.51 | 4.76     | 1152.51 | 4.76     | 1152.51 | 4.76     | 1152.51 | 4.76     |
| 4.766678 | 1152.51 | 4.766678 | 1152.51 | 4.766678 | 1152.51 | 4.766678 | 1152.51 | 4.766678 |
| 4.77     | 1152.51 | 4.77     | 1152.51 | 4.77     | 1152.51 | 4.77     | 1152.51 | 4.77     |
| 4.776678 | 1152.51 | 4.776678 | 1152.51 | 4.776678 | 1152.51 | 4.776678 | 1152.51 | 4.776678 |
| 4.78     | 1152.51 | 4.78     | 1152.51 | 4.78     | 1152.51 | 4.78     | 1152.51 | 4.78     |
| 4.786678 | 1152.51 | 4.786678 | 1152.51 | 4.786678 | 1152.51 | 4.786678 | 1152.51 | 4.786678 |
| 4.79     | 1152.51 | 4.79     | 1152.51 | 4.79     | 1152.51 | 4.79     | 1152.51 | 4.79     |
| 4.796678 | 1152.51 | 4.796678 | 1152.51 | 4.796678 | 1152.51 | 4.796678 | 1152.51 | 4.796678 |
| 4.8      | 1152.51 | 4.8      | 1152.51 | 4.8      | 1152.51 | 4.8      | 1152.51 | 4.8      |
| 4.806678 | 1152.51 | 4.806678 | 1152.51 | 4.806678 | 1152.51 | 4.806678 | 1152.51 | 4.806678 |
| 4.81     | 1152.51 | 4.81     | 1152.51 | 4.81     | 1152.51 | 4.81     | 1152.51 | 4.81     |
| 4.816678 | 1152.51 | 4.816678 | 1152.51 | 4.816678 | 1152.51 | 4.816678 | 1152.51 | 4.816678 |
| 4.82     | 1152.51 | 4.82     | 1152.51 | 4.82     | 1152.51 | 4.82     | 1152.51 | 4.82     |
| 4.826678 | 1152.51 | 4.826678 | 1152.51 | 4.826678 | 1152.51 | 4.826678 | 1152.51 | 4.826678 |
| 4.83     | 1152.51 | 4.83     | 1152.51 | 4.83     | 1152.51 | 4.83     | 1152.51 | 4.83     |
| 4.836678 | 1152.51 | 4.836678 | 1152.51 | 4.836678 | 1152.51 | 4.836678 | 1152.51 | 4.836678 |
| 4.84     | 1152.51 | 4.84     | 1152.51 | 4.84     | 1152.51 | 4.84     | 1152.51 | 4.84     |
| 4.846678 | 1152.51 | 4.846678 | 1152.51 | 4.846678 | 1152.51 | 4.846678 | 1152.51 | 4.846678 |
| 4.85     | 1152.51 | 4.85     | 1152.51 | 4.85     | 1152.51 | 4.85     | 1152.51 | 4.85     |
| 4.856678 | 1152.51 | 4.856678 | 1152.51 | 4.856678 | 1152.51 | 4.856678 | 1152.51 | 4.856678 |
| 4.86     | 1152.51 | 4.86     | 1152.51 | 4.86     | 1152.51 | 4.86     | 1152.51 | 4.86     |
| 4.866678 | 1152.51 | 4.866678 | 1152.51 | 4.866678 | 1152.51 | 4.866678 | 1152.51 | 4.866678 |
| 4.87     | 1152.51 | 4.87     | 1152    |          |         |          |         |          |

|          |         |          |         |          |         |          |         |          |
|----------|---------|----------|---------|----------|---------|----------|---------|----------|
| 4.916678 | 1152.51 | 4.916678 | 1152.51 | 4.916678 | 1152.51 | 4.916678 | 1152.51 | 4.916678 |
| 4.92     | 1152.51 | 4.92     | 1152.51 | 4.92     | 1152.51 | 4.92     | 1152.51 | 4.92     |
| 4.926678 | 1152.51 | 4.926678 | 1152.51 | 4.926678 | 1152.51 | 4.926678 | 1152.51 | 4.926678 |
| 4.93     | 1152.51 | 4.93     | 1152.51 | 4.93     | 1152.51 | 4.93     | 1152.51 | 4.93     |
| 4.936678 | 1152.51 | 4.936678 | 1152.51 | 4.936678 | 1152.51 | 4.936678 | 1152.51 | 4.936678 |
| 4.94     | 1152.51 | 4.94     | 1152.51 | 4.94     | 1152.51 | 4.94     | 1152.51 | 4.94     |
| 4.946678 | 1152.51 | 4.946678 | 1152.51 | 4.946678 | 1152.51 | 4.946678 | 1152.51 | 4.946678 |
| 4.95     | 1152.51 | 4.95     | 1152.51 | 4.95     | 1152.51 | 4.95     | 1152.51 | 4.95     |
| 4.956678 | 1152.51 | 4.956678 | 1152.51 | 4.956678 | 1152.51 | 4.956678 | 1152.51 | 4.956678 |
| 4.96     | 1152.51 | 4.96     | 1152.51 | 4.96     | 1152.51 | 4.96     | 1152.51 | 4.96     |
| 4.966678 | 1152.51 | 4.966678 | 1152.51 | 4.966678 | 1152.51 | 4.966678 | 1152.51 | 4.966678 |
| 4.97     | 1152.51 | 4.97     | 1152.51 | 4.97     | 1152.51 | 4.97     | 1152.51 | 4.97     |
| 4.976678 | 1152.51 | 4.976678 | 1152.51 | 4.976678 | 1152.51 | 4.976678 | 1152.51 | 4.976678 |
| 4.98     | 1152.51 | 4.98     | 1152.51 | 4.98     | 1152.51 | 4.98     | 1152.51 | 4.98     |
| 4.986678 | 1152.51 | 4.986678 | 1152.51 | 4.986678 | 1152.51 | 4.986678 | 1152.51 | 4.986678 |
| 4.99     | 1152.51 | 4.99     | 1152.51 | 4.99     | 1152.51 | 4.99     | 1152.51 | 4.99     |
| 4.996678 | 1152.51 | 4.996678 | 1152.51 | 4.996678 | 1152.51 | 4.996678 | 1152.51 | 4.996678 |
| 5        | 1152.51 | 5        | 1152.51 | 5        | 1152.51 | 5        | 1152.51 | 5        |
| 5.006678 | 1152.51 | 5.006678 | 1152.51 | 5.006678 | 1152.51 | 5.006678 | 1152.51 | 5.006678 |
| 5.01     | 1152.51 | 5.01     | 1152.51 | 5.01     | 1152.51 | 5.01     | 1152.51 | 5.01     |
| 5.016678 | 1152.51 | 5.016678 | 1152.51 | 5.016678 | 1152.51 | 5.016678 | 1152.51 | 5.016678 |
| 5.02     | 1152.51 | 5.02     | 1152.51 | 5.02     | 1152.51 | 5.02     | 1152.51 | 5.02     |
| 5.026678 | 1152.51 | 5.026678 | 1152.51 | 5.026678 | 1152.51 | 5.026678 | 1152.51 | 5.026678 |
| 5.03     | 1152.51 | 5.03     | 1152.51 | 5.03     | 1152.51 | 5.03     | 1152.51 | 5.03     |
| 5.036678 | 1152.51 | 5.036678 | 1152.51 | 5.036678 | 1152.51 | 5.036678 | 1152.51 | 5.036678 |
| 5.04     | 1152.51 | 5.04     | 1152.51 | 5.04     | 1152.51 | 5.04     | 1152.51 | 5.04     |
| 5.046678 | 1152.51 | 5.046678 | 1152.51 | 5.046678 | 1152.51 | 5.046678 | 1152.51 | 5.046678 |
| 5.05     | 1152.51 | 5.05     | 1152.51 | 5.05     | 1152.51 | 5.05     | 1152.51 | 5.05     |
| 5.056678 | 1152.51 | 5.056678 | 1152.51 | 5.056678 | 1152.51 | 5.056678 | 1152.51 | 5.056678 |
| 5.06     | 1152.51 | 5.06     | 1152.51 | 5.06     | 1152.51 | 5.06     | 1152.51 | 5.06     |
| 5.066678 | 1152.51 | 5.066678 | 1152.51 | 5.066678 | 1152.51 | 5.066678 | 1152.51 | 5.066678 |
| 5.07     | 1152.51 | 5.07     | 1152.51 | 5.07     | 1152.51 | 5.07     | 1152.51 | 5.07     |
| 5.076678 | 1152.51 | 5.076678 | 1152.51 | 5.076678 | 1152.51 | 5.076678 | 1152.51 | 5.076678 |
| 5.08     | 1152.51 | 5.08     | 1152.51 | 5.08     | 1152.51 | 5.08     | 1152.51 | 5.08     |
| 5.086678 | 1152.51 | 5.086678 | 1152.51 | 5.086678 | 1152.51 | 5.086678 | 1152.51 | 5.086678 |
| 5.09     | 1152.51 | 5.09     | 1152.51 | 5.09     | 1152.51 | 5.09     | 1152.51 | 5.09     |
| 5.096678 | 1152.51 | 5.096678 | 1152.51 | 5.096678 | 1152.51 | 5.096678 | 1152.51 | 5.096678 |
| 5.1      | 1152.51 | 5.1      | 1152.51 | 5.1      | 1152.51 | 5.1      | 1152.51 | 5.1      |
| 5.106678 | 1152.51 | 5.106678 | 1152.51 | 5.106678 | 1152.51 | 5.106678 | 1152.51 | 5.106678 |
| 5.11     | 1152.51 | 5.11     | 1152.51 | 5.11     | 1152.51 | 5.11     | 1152.51 | 5.11     |
| 5.116678 | 1152.51 | 5.116678 | 1152.51 | 5.116678 | 1152.51 | 5.116678 | 1152.51 | 5.116678 |
| 5.12     | 1152.51 | 5.12     | 1152.51 | 5.12     | 1152.51 | 5.12     | 1152.51 | 5.12     |
| 5.126678 | 1152.51 | 5.126678 | 1152.51 | 5.126678 | 1152.51 | 5.126678 | 1152.51 | 5.126678 |
| 5.13     | 1152.51 | 5.13     | 1152.51 | 5.13     | 1152.51 | 5.13     | 1152.51 | 5.13     |
| 5.136678 | 1152.51 | 5.136678 | 1152.51 | 5.136678 | 1152.51 | 5.136678 | 1152.51 | 5.136678 |
| 5.14     | 1152.51 | 5.14     | 1152.51 | 5.14     | 1152.51 | 5.14     | 1152.51 | 5.14     |
| 5.146678 | 1152.51 | 5.146678 | 1152.51 | 5.146678 | 1152.51 | 5.146678 | 1152.51 | 5.146678 |

|          |         |          |         |          |         |          |         |          |
|----------|---------|----------|---------|----------|---------|----------|---------|----------|
| 5.15     | 1152.51 | 5.15     | 1152.51 | 5.15     | 1152.51 | 5.15     | 1152.51 | 5.15     |
| 5.156678 | 1152.51 | 5.156678 | 1152.51 | 5.156678 | 1152.51 | 5.156678 | 1152.51 | 5.156678 |
| 5.16     | 1152.51 | 5.16     | 1152.51 | 5.16     | 1152.51 | 5.16     | 1152.51 | 5.16     |
| 5.166678 | 1152.51 | 5.166678 | 1152.51 | 5.166678 | 1152.51 | 5.166678 | 1152.51 | 5.166678 |
| 5.17     | 1152.51 | 5.17     | 1152.51 | 5.17     | 1152.51 | 5.17     | 1152.51 | 5.17     |
| 5.176678 | 1152.51 | 5.176678 | 1152.51 | 5.176678 | 1152.51 | 5.176678 | 1152.51 | 5.176678 |
| 5.18     | 1152.51 | 5.18     | 1152.51 | 5.18     | 1152.51 | 5.18     | 1152.51 | 5.18     |
| 5.186678 | 1152.51 | 5.186678 | 1152.51 | 5.186678 | 1152.51 | 5.186678 | 1152.51 | 5.186678 |
| 5.19     | 1152.51 | 5.19     | 1152.51 | 5.19     | 1152.51 | 5.19     | 1152.51 | 5.19     |
| 5.196678 | 1152.51 | 5.196678 | 1152.51 | 5.196678 | 1152.51 | 5.196678 | 1152.51 | 5.196678 |
| 5.2      | 1152.51 | 5.2      | 1152.51 | 5.2      | 1152.51 | 5.2      | 1152.51 | 5.2      |
| 5.206678 | 1152.51 | 5.206678 | 1152.51 | 5.206678 | 1152.51 | 5.206678 | 1152.51 | 5.206678 |
| 5.21     | 1152.51 | 5.21     | 1152.51 | 5.21     | 1152.51 | 5.21     | 1152.51 | 5.21     |
| 5.216678 | 1152.51 | 5.216678 | 1152.51 | 5.216678 | 1152.51 | 5.216678 | 1152.51 | 5.216678 |
| 5.22     | 1152.51 | 5.22     | 1152.51 | 5.22     | 1152.51 | 5.22     | 1152.51 | 5.22     |
| 5.226678 | 1152.51 | 5.226678 | 1152.51 | 5.226678 | 1152.51 | 5.226678 | 1152.51 | 5.226678 |
| 5.23     | 1152.51 | 5.23     | 1152.51 | 5.23     | 1152.51 | 5.23     | 1152.51 | 5.23     |
| 5.236678 | 1152.51 | 5.236678 | 1152.51 | 5.236678 | 1152.51 | 5.236678 | 1152.51 | 5.236678 |
| 5.24     | 1152.51 | 5.24     | 1152.51 | 5.24     | 1152.51 | 5.24     | 1152.51 | 5.24     |
| 5.246678 | 1152.51 | 5.246678 | 1152.51 | 5.246678 | 1152.51 | 5.246678 | 1152.51 | 5.246678 |
| 5.25     | 1152.51 | 5.25     | 1152.51 | 5.25     | 1152.51 | 5.25     | 1152.51 | 5.25     |
| 5.256678 | 1152.51 | 5.256678 | 1152.51 | 5.256678 | 1152.51 | 5.256678 | 1152.51 | 5.256678 |
| 5.26     | 1152.51 | 5.26     | 1152.51 | 5.26     | 1152.51 | 5.26     | 1152.51 | 5.26     |
| 5.266678 | 1152.51 | 5.266678 | 1152.51 | 5.266678 | 1152.51 | 5.266678 | 1152.51 | 5.266678 |
| 5.27     | 1152.51 | 5.27     | 1152.51 | 5.27     | 1152.51 | 5.27     | 1152.51 | 5.27     |
| 5.276678 | 1152.51 | 5.276678 | 1152.51 | 5.276678 | 1152.51 | 5.276678 | 1152.51 | 5.276678 |
| 5.28     | 1152.51 | 5.28     | 1152.51 | 5.28     | 1152.51 | 5.28     | 1152.51 | 5.28     |
| 5.286678 | 1152.51 | 5.286678 | 1152.51 | 5.286678 | 1152.51 | 5.286678 | 1152.51 | 5.286678 |
| 5.29     | 1152.51 | 5.29     | 1152.51 | 5.29     | 1152.51 | 5.29     | 1152.51 | 5.29     |
| 5.296678 | 1152.51 | 5.296678 | 1152.51 | 5.296678 | 1152.51 | 5.296678 | 1152.51 | 5.296678 |
| 5.3      | 1152.51 | 5.3      | 1152.51 | 5.3      | 1152.51 | 5.3      | 1152.51 | 5.3      |
| 5.306678 | 1152.51 | 5.306678 | 1152.51 | 5.306678 | 1152.51 | 5.306678 | 1152.51 | 5.306678 |
| 5.31     | 1152.51 | 5.31     | 1152.51 | 5.31     | 1152.51 | 5.31     | 1152.51 | 5.31     |
| 5.316678 | 1152.51 | 5.316678 | 1152.51 | 5.316678 | 1152.51 | 5.316678 | 1152.51 | 5.316678 |
| 5.32     | 1152.51 | 5.32     | 1152.51 | 5.32     | 1152.51 | 5.32     | 1152.51 | 5.32     |
| 5.326678 | 1152.51 | 5.326678 | 1152.51 | 5.326678 | 1152.51 | 5.326678 | 1152.51 | 5.326678 |
| 5.33     | 1152.51 | 5.33     | 1152.51 | 5.33     | 1152.51 | 5.33     | 1152.51 | 5.33     |
| 5.336678 | 1152.51 | 5.336678 | 1152.51 | 5.336678 | 1152.51 | 5.336678 | 1152.51 | 5.336678 |
| 5.34     | 1152.51 | 5.34     | 1152.51 | 5.34     | 1152.51 | 5.34     | 1152.51 | 5.34     |
| 5.346678 | 1152.51 | 5.346678 | 1152.51 | 5.346678 | 1152.51 | 5.346678 | 1152.51 | 5.346678 |
| 5.35     | 1152.51 | 5.35     | 1152.51 | 5.35     | 1152.51 | 5.35     | 1152.51 | 5.35     |
| 5.356678 | 1152.51 | 5.356678 | 1152.51 | 5.356678 | 1152.51 | 5.356678 | 1152.51 | 5.356678 |
| 5.36     | 1152.51 | 5.36     | 1152.51 | 5.36     | 1152.51 | 5.36     | 1152.51 | 5.36     |
| 5.366678 | 1152.51 | 5.366678 | 1152.51 | 5.366678 | 1152.51 | 5.366678 | 1152.51 | 5.366678 |
| 5.37     | 1152.51 | 5.37     | 1152.51 | 5.37     | 1152.51 | 5.37     | 1152.51 | 5.37     |
| 5.376678 | 1152.51 | 5.376678 | 1152.51 | 5.376678 | 1152.51 | 5.376678 | 1152.51 | 5.376678 |
| 5.38     | 1152.51 | 5.38     | 1152.51 | 5.38     | 1152.51 | 5.38     | 1152.51 | 5.38     |

|          |         |          |         |          |         |          |         |          |
|----------|---------|----------|---------|----------|---------|----------|---------|----------|
| 5.386678 | 1152.51 | 5.386678 | 1152.51 | 5.386678 | 1152.51 | 5.386678 | 1152.51 | 5.386678 |
| 5.39     | 1152.51 | 5.39     | 1152.51 | 5.39     | 1152.51 | 5.39     | 1152.51 | 5.39     |
| 5.396678 | 1152.51 | 5.396678 | 1152.51 | 5.396678 | 1152.51 | 5.396678 | 1152.51 | 5.396678 |
| 5.4      | 1152.51 | 5.4      | 1152.51 | 5.4      | 1152.51 | 5.4      | 1152.51 | 5.4      |
| 5.406678 | 1152.51 | 5.406678 | 1152.51 | 5.406678 | 1152.51 | 5.406678 | 1152.51 | 5.406678 |
| 5.41     | 1152.51 | 5.41     | 1152.51 | 5.41     | 1152.51 | 5.41     | 1152.51 | 5.41     |
| 5.416678 | 1152.51 | 5.416678 | 1152.51 | 5.416678 | 1152.51 | 5.416678 | 1152.51 | 5.416678 |
| 5.42     | 1152.51 | 5.42     | 1152.51 | 5.42     | 1152.51 | 5.42     | 1152.51 | 5.42     |
| 5.426678 | 1152.51 | 5.426678 | 1152.51 | 5.426678 | 1152.51 | 5.426678 | 1152.51 | 5.426678 |
| 5.43     | 1152.51 | 5.43     | 1152.51 | 5.43     | 1152.51 | 5.43     | 1152.51 | 5.43     |
| 5.436678 | 1152.51 | 5.436678 | 1152.51 | 5.436678 | 1152.51 | 5.436678 | 1152.51 | 5.436678 |
| 5.44     | 1152.51 | 5.44     | 1152.51 | 5.44     | 1152.51 | 5.44     | 1152.51 | 5.44     |
| 5.446678 | 1152.51 | 5.446678 | 1152.51 | 5.446678 | 1152.51 | 5.446678 | 1152.51 | 5.446678 |
| 5.45     | 1152.51 | 5.45     | 1152.51 | 5.45     | 1152.51 | 5.45     | 1152.51 | 5.45     |
| 5.456678 | 1152.51 | 5.456678 | 1152.51 | 5.456678 | 1152.51 | 5.456678 | 1152.51 | 5.456678 |
| 5.46     | 1152.51 | 5.46     | 1152.51 | 5.46     | 1152.51 | 5.46     | 1152.51 | 5.46     |
| 5.466678 | 1152.51 | 5.466678 | 1152.51 | 5.466678 | 1152.51 | 5.466678 | 1152.51 | 5.466678 |
| 5.47     | 1152.51 | 5.47     | 1152.51 | 5.47     | 1152.51 | 5.47     | 1152.51 | 5.47     |
| 5.476678 | 1152.51 | 5.476678 | 1152.51 | 5.476678 | 1152.51 | 5.476678 | 1152.51 | 5.476678 |
| 5.48     | 1152.51 | 5.48     | 1152.51 | 5.48     | 1152.51 | 5.48     | 1152.51 | 5.48     |
| 5.486678 | 1152.51 | 5.486678 | 1152.51 | 5.486678 | 1152.51 | 5.486678 | 1152.51 | 5.486678 |
| 5.49     | 1152.51 | 5.49     | 1152.51 | 5.49     | 1152.51 | 5.49     | 1152.51 | 5.49     |
| 5.496678 | 1152.51 | 5.496678 | 1152.51 | 5.496678 | 1152.51 | 5.496678 | 1152.51 | 5.496678 |
| 5.5      | 1152.51 | 5.5      | 1152.51 | 5.5      | 1152.51 | 5.5      | 1152.51 | 5.5      |
| 5.506678 | 1152.51 | 5.506678 | 1152.51 | 5.506678 | 1152.51 | 5.506678 | 1152.51 | 5.506678 |
| 5.51     | 1152.51 | 5.51     | 1152.51 | 5.51     | 1152.51 | 5.51     | 1152.51 | 5.51     |
| 5.516678 | 1152.51 | 5.516678 | 1152.51 | 5.516678 | 1152.51 | 5.516678 | 1152.51 | 5.516678 |
| 5.52     | 1152.51 | 5.52     | 1152.51 | 5.52     | 1152.51 | 5.52     | 1152.51 | 5.52     |
| 5.526678 | 1152.51 | 5.526678 | 1152.51 | 5.526678 | 1152.51 | 5.526678 | 1152.51 | 5.526678 |
| 5.53     | 1152.51 | 5.53     | 1152.51 | 5.53     | 1152.51 | 5.53     | 1152.51 | 5.53     |
| 5.536678 | 1152.51 | 5.536678 | 1152.51 | 5.536678 | 1152.51 | 5.536678 | 1152.51 | 5.536678 |
| 5.54     | 1152.51 | 5.54     | 1152.51 | 5.54     | 1152.51 | 5.54     | 1152.51 | 5.54     |
| 5.546678 | 1152.51 | 5.546678 | 1152.51 | 5.546678 | 1152.51 | 5.546678 | 1152.51 | 5.546678 |
| 5.55     | 1152.51 | 5.55     | 1152.51 | 5.55     | 1152.51 | 5.55     | 1152.51 | 5.55     |
| 5.556678 | 1152.51 | 5.556678 | 1152.51 | 5.556678 | 1152.51 | 5.556678 | 1152.51 | 5.556678 |
| 5.56     | 1152.51 | 5.56     | 1152.51 | 5.56     | 1152.51 | 5.56     | 1152.51 | 5.56     |
| 5.566678 | 1152.51 | 5.566678 | 1152.51 | 5.566678 | 1152.51 | 5.566678 | 1152.51 | 5.566678 |
| 5.57     | 1152.51 | 5.57     | 1152.51 | 5.57     | 1152.51 | 5.57     | 1152.51 | 5.57     |
| 5.576678 | 1152.51 | 5.576678 | 1152.51 | 5.576678 | 1152.51 | 5.576678 | 1152.51 | 5.576678 |
| 5.58     | 1152.51 | 5.58     | 1152.51 | 5.58     | 1152.51 | 5.58     | 1152.51 | 5.58     |
| 5.586678 | 1152.51 | 5.586678 | 1152.51 | 5.586678 | 1152.51 | 5.586678 | 1152.51 | 5.586678 |
| 5.59     | 1152.51 | 5.59     | 1152.51 | 5.59     | 1152.51 | 5.59     | 1152.51 | 5.59     |
| 5.596678 | 1152.51 | 5.596678 | 1152.51 | 5.596678 | 1152.51 | 5.596678 | 1152.51 | 5.596678 |
| 5.6      | 1152.51 | 5.6      | 1152.51 | 5.6      | 1152.51 | 5.6      | 1152.51 | 5.6      |
| 5.606678 | 1152.51 | 5.606678 | 1152.51 | 5.606678 | 1152.51 | 5.606678 | 1152.51 | 5.606678 |
| 5.61     | 1152.51 | 5.61     | 1152.51 | 5.61     | 1152.51 | 5.61     | 1152.51 | 5.61     |
| 5.616678 | 1152.51 | 5.616678 | 1152.51 | 5.616678 | 1152.51 | 5.616678 | 1152.51 | 5.616678 |

|          |         |          |         |          |         |          |         |          |
|----------|---------|----------|---------|----------|---------|----------|---------|----------|
| 5.62     | 1152.51 | 5.62     | 1152.51 | 5.62     | 1152.51 | 5.62     | 1152.51 | 5.62     |
| 5.626678 | 1152.51 | 5.626678 | 1152.51 | 5.626678 | 1152.51 | 5.626678 | 1152.51 | 5.626678 |
| 5.63     | 1152.51 | 5.63     | 1152.51 | 5.63     | 1152.51 | 5.63     | 1152.51 | 5.63     |
| 5.636678 | 1152.51 | 5.636678 | 1152.51 | 5.636678 | 1152.51 | 5.636678 | 1152.51 | 5.636678 |
| 5.64     | 1152.51 | 5.64     | 1152.51 | 5.64     | 1152.51 | 5.64     | 1152.51 | 5.64     |
| 5.646678 | 1152.51 | 5.646678 | 1152.51 | 5.646678 | 1152.51 | 5.646678 | 1152.51 | 5.646678 |
| 5.65     | 1152.51 | 5.65     | 1152.51 | 5.65     | 1152.51 | 5.65     | 1152.51 | 5.65     |
| 5.656678 | 1152.51 | 5.656678 | 1152.51 | 5.656678 | 1152.51 | 5.656678 | 1152.51 | 5.656678 |
| 5.66     | 1152.51 | 5.66     | 1152.51 | 5.66     | 1152.51 | 5.66     | 1152.51 | 5.66     |
| 5.666678 | 1152.51 | 5.666678 | 1152.51 | 5.666678 | 1152.51 | 5.666678 | 1152.51 | 5.666678 |
| 5.67     | 1152.51 | 5.67     | 1152.51 | 5.67     | 1152.51 | 5.67     | 1152.51 | 5.67     |
| 5.676678 | 1152.51 | 5.676678 | 1152.51 | 5.676678 | 1152.51 | 5.676678 | 1152.51 | 5.676678 |
| 5.68     | 1152.51 | 5.68     | 1152.51 | 5.68     | 1152.51 | 5.68     | 1152.51 | 5.68     |
| 5.686678 | 1152.51 | 5.686678 | 1152.51 | 5.686678 | 1152.51 | 5.686678 | 1152.51 | 5.686678 |
| 5.69     | 1152.51 | 5.69     | 1152.51 | 5.69     | 1152.51 | 5.69     | 1152.51 | 5.69     |
| 5.696678 | 1152.51 | 5.696678 | 1152.51 | 5.696678 | 1152.51 | 5.696678 | 1152.51 | 5.696678 |
| 5.7      | 1152.51 | 5.7      | 1152.51 | 5.7      | 1152.51 | 5.7      | 1152.51 | 5.7      |
| 5.706678 | 1152.51 | 5.706678 | 1152.51 | 5.706678 | 1152.51 | 5.706678 | 1152.51 | 5.706678 |
| 5.71     | 1152.51 | 5.71     | 1152.51 | 5.71     | 1152.51 | 5.71     | 1152.51 | 5.71     |
| 5.716678 | 1152.51 | 5.716678 | 1152.51 | 5.716678 | 1152.51 | 5.716678 | 1152.51 | 5.716678 |
| 5.72     | 1152.51 | 5.72     | 1152.51 | 5.72     | 1152.51 | 5.72     | 1152.51 | 5.72     |
| 5.726678 | 1152.51 | 5.726678 | 1152.51 | 5.726678 | 1152.51 | 5.726678 | 1152.51 | 5.726678 |
| 5.73     | 1152.51 | 5.73     | 1152.51 | 5.73     | 1152.51 | 5.73     | 1152.51 | 5.73     |
| 5.736678 | 1152.51 | 5.736678 | 1152.51 | 5.736678 | 1152.51 | 5.736678 | 1152.51 | 5.736678 |
| 5.74     | 1152.51 | 5.74     | 1152.51 | 5.74     | 1152.51 | 5.74     | 1152.51 | 5.74     |
| 5.746678 | 1152.51 | 5.746678 | 1152.51 | 5.746678 | 1152.51 | 5.746678 | 1152.51 | 5.746678 |
| 5.75     | 1152.51 | 5.75     | 1152.51 | 5.75     | 1152.51 | 5.75     | 1152.51 | 5.75     |
| 5.756678 | 1152.51 | 5.756678 | 1152.51 | 5.756678 | 1152.51 | 5.756678 | 1152.51 | 5.756678 |
| 5.76     | 1152.51 | 5.76     | 1152.51 | 5.76     | 1152.51 | 5.76     | 1152.51 | 5.76     |
| 5.766678 | 1152.51 | 5.766678 | 1152.51 | 5.766678 | 1152.51 | 5.766678 | 1152.51 | 5.766678 |
| 5.77     | 1152.51 | 5.77     | 1152.51 | 5.77     | 1152.51 | 5.77     | 1152.51 | 5.77     |
| 5.776678 | 1152.51 | 5.776678 | 1152.51 | 5.776678 | 1152.51 | 5.776678 | 1152.51 | 5.776678 |
| 5.78     | 1152.51 | 5.78     | 1152.51 | 5.78     | 1152.51 | 5.78     | 1152.51 | 5.78     |
| 5.786678 | 1152.51 | 5.786678 | 1152.51 | 5.786678 | 1152.51 | 5.786678 | 1152.51 | 5.786678 |
| 5.79     | 1152.51 | 5.79     | 1152.51 | 5.79     | 1152.51 | 5.79     | 1152.51 | 5.79     |
| 5.796678 | 1152.51 | 5.796678 | 1152.51 | 5.796678 | 1152.51 | 5.796678 | 1152.51 | 5.796678 |
| 5.8      | 1152.51 | 5.8      | 1152.51 | 5.8      | 1152.51 | 5.8      | 1152.51 | 5.8      |
| 5.806678 | 1152.51 | 5.806678 | 1152.51 | 5.806678 | 1152.51 | 5.806678 | 1152.51 | 5.806678 |
| 5.81     | 1152.51 | 5.81     | 1152.51 | 5.81     | 1152.51 | 5.81     | 1152.51 | 5.81     |
| 5.816678 | 1152.51 | 5.816678 | 1152.51 | 5.816678 | 1152.51 | 5.816678 | 1152.51 | 5.816678 |
| 5.82     | 1152.51 | 5.82     | 1152.51 | 5.82     | 1152.51 | 5.82     | 1152.51 | 5.82     |
| 5.826678 | 1152.51 | 5.826678 | 1152.51 | 5.826678 | 1152.51 | 5.826678 | 1152.51 | 5.826678 |
| 5.83     | 1152.51 | 5.83     | 1152.51 | 5.83     | 1152.51 | 5.83     | 1152.51 | 5.83     |
| 5.836678 | 1152.51 | 5.836678 | 1152.51 | 5.836678 | 1152.51 | 5.836678 | 1152.51 | 5.836678 |
| 5.84     | 1152.51 | 5.84     | 1152.51 | 5.84     | 1152.51 | 5.84     | 1152.51 | 5.84     |
| 5.846678 | 1152.51 | 5.846678 | 1152.51 | 5.846678 | 1152.51 | 5.846678 | 1152.51 | 5.846678 |
| 5.85     | 1152.51 | 5.85     | 1152.51 | 5.85     | 1152.51 | 5.85     | 1152.51 | 5.85     |

|          |         |          |         |          |         |          |         |          |
|----------|---------|----------|---------|----------|---------|----------|---------|----------|
| 5.856678 | 1152.51 | 5.856678 | 1152.51 | 5.856678 | 1152.51 | 5.856678 | 1152.51 | 5.856678 |
| 5.86     | 1152.51 | 5.86     | 1152.51 | 5.86     | 1152.51 | 5.86     | 1152.51 | 5.86     |
| 5.866678 | 1152.51 | 5.866678 | 1152.51 | 5.866678 | 1152.51 | 5.866678 | 1152.51 | 5.866678 |
| 5.87     | 1152.51 | 5.87     | 1152.51 | 5.87     | 1152.51 | 5.87     | 1152.51 | 5.87     |
| 5.876678 | 1152.51 | 5.876678 | 1152.51 | 5.876678 | 1152.51 | 5.876678 | 1152.51 | 5.876678 |
| 5.88     | 1152.51 | 5.88     | 1152.51 | 5.88     | 1152.51 | 5.88     | 1152.51 | 5.88     |
| 5.886678 | 1152.51 | 5.886678 | 1152.51 | 5.886678 | 1152.51 | 5.886678 | 1152.51 | 5.886678 |
| 5.89     | 1152.51 | 5.89     | 1152.51 | 5.89     | 1152.51 | 5.89     | 1152.51 | 5.89     |
| 5.896678 | 1152.51 | 5.896678 | 1152.51 | 5.896678 | 1152.51 | 5.896678 | 1152.51 | 5.896678 |
| 5.9      | 1152.51 | 5.9      | 1152.51 | 5.9      | 1152.51 | 5.9      | 1152.51 | 5.9      |
| 5.906678 | 1152.51 | 5.906678 | 1152.51 | 5.906678 | 1152.51 | 5.906678 | 1152.51 | 5.906678 |
| 5.91     | 1152.51 | 5.91     | 1152.51 | 5.91     | 1152.51 | 5.91     | 1152.51 | 5.91     |
| 5.916678 | 1152.51 | 5.916678 | 1152.51 | 5.916678 | 1152.51 | 5.916678 | 1152.51 | 5.916678 |
| 5.92     | 1152.51 | 5.92     | 1152.51 | 5.92     | 1152.51 | 5.92     | 1152.51 | 5.92     |
| 5.926678 | 1152.51 | 5.926678 | 1152.51 | 5.926678 | 1152.51 | 5.926678 | 1152.51 | 5.926678 |
| 5.93     | 1152.51 | 5.93     | 1152.51 | 5.93     | 1152.51 | 5.93     | 1152.51 | 5.93     |
| 5.936678 | 1152.51 | 5.936678 | 1152.51 | 5.936678 | 1152.51 | 5.936678 | 1152.51 | 5.936678 |
| 5.94     | 1152.51 | 5.94     | 1152.51 | 5.94     | 1152.51 | 5.94     | 1152.51 | 5.94     |
| 5.946678 | 1152.51 | 5.946678 | 1152.51 | 5.946678 | 1152.51 | 5.946678 | 1152.51 | 5.946678 |
| 5.95     | 1152.51 | 5.95     | 1152.51 | 5.95     | 1152.51 | 5.95     | 1152.51 | 5.95     |
| 5.956678 | 1152.51 | 5.956678 | 1152.51 | 5.956678 | 1152.51 | 5.956678 | 1152.51 | 5.956678 |
| 5.96     | 1152.51 | 5.96     | 1152.51 | 5.96     | 1152.51 | 5.96     | 1152.51 | 5.96     |
| 5.966678 | 1152.51 | 5.966678 | 1152.51 | 5.966678 | 1152.51 | 5.966678 | 1152.51 | 5.966678 |
| 5.97     | 1152.51 | 5.97     | 1152.51 | 5.97     | 1152.51 | 5.97     | 1152.51 | 5.97     |
| 5.976678 | 1152.51 | 5.976678 | 1152.51 | 5.976678 | 1152.51 | 5.976678 | 1152.51 | 5.976678 |
| 5.98     | 1152.51 | 5.98     | 1152.51 | 5.98     | 1152.51 | 5.98     | 1152.51 | 5.98     |
| 5.986678 | 1152.51 | 5.986678 | 1152.51 | 5.986678 | 1152.51 | 5.986678 | 1152.51 | 5.986678 |
| 5.99     | 1152.51 | 5.99     | 1152.51 | 5.99     | 1152.51 | 5.99     | 1152.51 | 5.99     |
| 5.996678 | 1152.51 | 5.996678 | 1152.51 | 5.996678 | 1152.51 | 5.996678 | 1152.51 | 5.996678 |
| 6        | 1152.51 | 6        | 1152.51 | 6        | 1152.51 | 6        | 1152.51 | 6        |
| 6.006678 | 1152.51 | 6.006678 | 1152.51 | 6.006678 | 1152.51 | 6.006678 | 1152.51 | 6.006678 |
| 6.01     | 1152.51 | 6.01     | 1152.51 | 6.01     | 1152.51 | 6.01     | 1152.51 | 6.01     |
| 6.016678 | 1152.51 | 6.016678 | 1152.51 | 6.016678 | 1152.51 | 6.016678 | 1152.51 | 6.016678 |
| 6.02     | 1152.51 | 6.02     | 1152.51 | 6.02     | 1152.51 | 6.02     | 1152.51 | 6.02     |
| 6.026678 | 1152.51 | 6.026678 | 1152.51 | 6.026678 | 1152.51 | 6.026678 | 1152.51 | 6.026678 |
| 6.03     | 1152.51 | 6.03     | 1152.51 | 6.03     | 1152.51 | 6.03     | 1152.51 | 6.03     |
| 6.036678 | 1152.51 | 6.036678 | 1152.51 | 6.036678 | 1152.51 | 6.036678 | 1152.51 | 6.036678 |
| 6.04     | 1152.51 | 6.04     | 1152.51 | 6.04     | 1152.51 | 6.04     | 1152.51 | 6.04     |
| 6.046678 | 1152.51 | 6.046678 | 1152.5  |          |         |          |         |          |

|          |         |          |         |          |         |          |         |          |
|----------|---------|----------|---------|----------|---------|----------|---------|----------|
| 6.09     | 1152.51 | 6.09     | 1152.51 | 6.09     | 1152.51 | 6.09     | 1152.51 | 6.09     |
| 6.096678 | 1152.51 | 6.096678 | 1152.51 | 6.096678 | 1152.51 | 6.096678 | 1152.51 | 6.096678 |
| 6.1      | 1152.51 | 6.1      | 1152.51 | 6.1      | 1152.51 | 6.1      | 1152.51 | 6.1      |
| 6.106678 | 1152.51 | 6.106678 | 1152.51 | 6.106678 | 1152.51 | 6.106678 | 1152.51 | 6.106678 |
| 6.11     | 1152.51 | 6.11     | 1152.51 | 6.11     | 1152.51 | 6.11     | 1152.51 | 6.11     |
| 6.116678 | 1152.51 | 6.116678 | 1152.51 | 6.116678 | 1152.51 | 6.116678 | 1152.51 | 6.116678 |
| 6.12     | 1152.51 | 6.12     | 1152.51 | 6.12     | 1152.51 | 6.12     | 1152.51 | 6.12     |
| 6.126678 | 1152.51 | 6.126678 | 1152.51 | 6.126678 | 1152.51 | 6.126678 | 1152.51 | 6.126678 |
| 6.13     | 1152.51 | 6.13     | 1152.51 | 6.13     | 1152.51 | 6.13     | 1152.51 | 6.13     |
| 6.136678 | 1152.51 | 6.136678 | 1152.51 | 6.136678 | 1152.51 | 6.136678 | 1152.51 | 6.136678 |
| 6.14     | 1152.51 | 6.14     | 1152.51 | 6.14     | 1152.51 | 6.14     | 1152.51 | 6.14     |
| 6.146678 | 1152.51 | 6.146678 | 1152.51 | 6.146678 | 1152.51 | 6.146678 | 1152.51 | 6.146678 |
| 6.15     | 1152.51 | 6.15     | 1152.51 | 6.15     | 1152.51 | 6.15     | 1152.51 | 6.15     |
| 6.156678 | 1152.51 | 6.156678 | 1152.51 | 6.156678 | 1152.51 | 6.156678 | 1152.51 | 6.156678 |
| 6.16     | 1152.51 | 6.16     | 1152.51 | 6.16     | 1152.51 | 6.16     | 1152.51 | 6.16     |
| 6.166678 | 1152.51 | 6.166678 | 1152.51 | 6.166678 | 1152.51 | 6.166678 | 1152.51 | 6.166678 |
| 6.17     | 1152.51 | 6.17     | 1152.51 | 6.17     | 1152.51 | 6.17     | 1152.51 | 6.17     |
| 6.176678 | 1152.51 | 6.176678 | 1152.51 | 6.176678 | 1152.51 | 6.176678 | 1152.51 | 6.176678 |
| 6.18     | 1152.51 | 6.18     | 1152.51 | 6.18     | 1152.51 | 6.18     | 1152.51 | 6.18     |
| 6.186678 | 1152.51 | 6.186678 | 1152.51 | 6.186678 | 1152.51 | 6.186678 | 1152.51 | 6.186678 |
| 6.19     | 1152.51 | 6.19     | 1152.51 | 6.19     | 1152.51 | 6.19     | 1152.51 | 6.19     |
| 6.196678 | 1152.51 | 6.196678 | 1152.51 | 6.196678 | 1152.51 | 6.196678 | 1152.51 | 6.196678 |
| 6.2      | 1152.51 | 6.2      | 1152.51 | 6.2      | 1152.51 | 6.2      | 1152.51 | 6.2      |
| 6.206678 | 1152.51 | 6.206678 | 1152.51 | 6.206678 | 1152.51 | 6.206678 | 1152.51 | 6.206678 |
| 6.21     | 1152.51 | 6.21     | 1152.51 | 6.21     | 1152.51 | 6.21     | 1152.51 | 6.21     |
| 6.216678 | 1152.51 | 6.216678 | 1152.51 | 6.216678 | 1152.51 | 6.216678 | 1152.51 | 6.216678 |
| 6.22     | 1152.51 | 6.22     | 1152.51 | 6.22     | 1152.51 | 6.22     | 1152.51 | 6.22     |
| 6.226678 | 1152.51 | 6.226678 | 1152.51 | 6.226678 | 1152.51 | 6.226678 | 1152.51 | 6.226678 |
| 6.23     | 1152.51 | 6.23     | 1152.51 | 6.23     | 1152.51 | 6.23     | 1152.51 | 6.23     |
| 6.236678 | 1152.51 | 6.236678 | 1152.51 | 6.236678 | 1152.51 | 6.236678 | 1152.51 | 6.236678 |
| 6.24     | 1152.51 | 6.24     | 1152.51 | 6.24     | 1152.51 | 6.24     | 1152.51 | 6.24     |
| 6.246678 | 1152.51 | 6.246678 | 1152.51 | 6.246678 | 1152.51 | 6.246678 | 1152.51 | 6.246678 |
| 6.25     | 1152.51 | 6.25     | 1152.51 | 6.25     | 1152.51 | 6.25     | 1152.51 | 6.25     |
| 6.256678 | 1152.51 | 6.256678 | 1152.51 | 6.256678 | 1152.51 | 6.256678 | 1152.51 | 6.256678 |
| 6.26     | 1152.51 | 6.26     | 1152.51 | 6.26     | 1152.51 | 6.26     | 1152.51 | 6.26     |
| 6.266678 | 1152.51 | 6.266678 | 1152.51 | 6.266678 | 1152.51 | 6.266678 | 1152.51 | 6.266678 |
| 6.27     | 1152.51 | 6.27     | 1152.51 | 6.27     | 1152.51 | 6.27     | 1152.51 | 6.27     |
| 6.276678 | 1152.51 | 6.276678 | 1152.51 | 6.276678 | 1152.51 | 6.276678 | 1152.51 | 6.276678 |
| 6.28     | 1152.51 | 6.28     | 1152.51 | 6.28     | 1152.51 | 6.28     | 1152.51 | 6.28     |
| 6.286678 | 1152.51 | 6.286678 | 1152.51 | 6.286678 | 1152.51 | 6.286678 | 1152.51 | 6.286678 |
| 6.29     | 1152.51 | 6.29     | 1152.51 | 6.29     | 1152.51 | 6.29     | 1152.51 | 6.29     |
| 6.296678 | 1152.51 | 6.296678 | 1152.51 | 6.296678 | 1152.51 | 6.296678 | 1152.51 | 6.296678 |
| 6.3      | 1152.51 | 6.3      | 1152.51 | 6.3      | 1152.51 | 6.3      | 1152.51 | 6.3      |
| 6.306678 | 1152.51 | 6.306678 | 1152.51 | 6.306678 | 1152.51 | 6.306678 | 1152.51 | 6.306678 |
| 6.31     | 1152.51 | 6.31     | 1152.51 | 6.31     | 1152.51 | 6.31     | 1152.51 | 6.31     |
| 6.316678 | 1152.51 | 6.316678 | 1152.51 | 6.316678 | 1152.51 | 6.316678 | 1152.51 | 6.316678 |
| 6.32     | 1152.51 | 6.32     | 1152.51 | 6.32     | 1152.51 | 6.32     | 1152.51 | 6.32     |

|          |         |            |         |          |         |          |         |          |
|----------|---------|------------|---------|----------|---------|----------|---------|----------|
| 6.326678 | 1152.51 | 6.326678   | 1152.51 | 6.326678 | 1152.51 | 6.326678 | 1152.51 | 6.326678 |
| 6.33     | 1152.51 | 6.33       | 1152.51 | 6.33     | 1152.51 | 6.33     | 1152.51 | 6.33     |
| 6.336678 | 1152.51 | 6.336678   | 1152.51 | 6.336678 | 1152.51 | 6.336678 | 1152.51 | 6.336678 |
| 6.34     | 1152.51 | 6.34       | 1152.51 | 6.34     | 1152.51 | 6.34     | 1152.51 | 6.34     |
| 6.346678 | 1152.51 | 6.346678   | 1152.51 | 6.346678 | 1152.51 | 6.346678 | 1152.51 | 6.346678 |
| 6.35     | 1152.51 | 6.35       | 1152.51 | 6.35     | 1152.51 | 6.35     | 1152.51 | 6.35     |
| 6.356678 | 1152.51 | 6.356678   | 1152.51 | 6.356678 | 1152.51 | 6.356678 | 1152.51 | 6.356678 |
| 6.36     | 1152.51 | 6.36       | 1152.51 | 6.36     | 1152.51 | 6.36     | 1152.51 | 6.36     |
| 6.366678 | 1152.51 | 6.366678   | 1152.51 | 6.366678 | 1152.51 | 6.366678 | 1152.51 | 6.366678 |
| 6.37     | 1152.51 | 6.37       | 1152.51 | 6.37     | 1152.51 | 6.37     | 1152.51 | 6.37     |
| 6.376678 | 1152.51 | 6.376678   | 1152.51 | 6.376678 | 1152.51 | 6.376678 | 1152.51 | 6.376678 |
| 6.38     | 1152.51 | 6.38       | 1152.51 | 6.38     | 1152.51 | 6.38     | 1152.51 | 6.38     |
| 6.386678 | 1152.51 | 6.386678   | 1152.51 | 6.386678 | 1152.51 | 6.386678 | 1152.51 | 6.386678 |
| 6.39     | 1152.51 | 6.39       | 1152.51 | 6.39     | 1152.51 | 6.39     | 1152.51 | 6.39     |
| 6.396678 | 1152.51 | 6.396678   | 1152.51 | 6.396678 | 1152.51 | 6.396678 | 1152.51 | 6.396678 |
| 6.4      | 1152.51 | 6.4        | 1152.51 | 6.4      | 1152.51 | 6.4      | 1152.51 | 6.4      |
| 6.406678 | 1152.51 | 6.406678   | 1152.51 | 6.406678 | 1152.51 | 6.406678 | 1152.51 | 6.406678 |
| 6.41     | 1152.51 | 6.41       | 1152.51 | 6.41     | 1152.51 | 6.41     | 1152.51 | 6.41     |
| 6.416678 | 1152.51 | 6.416678   | 1152.51 | 6.416678 | 1152.51 | 6.416678 | 1152.51 | 6.416678 |
| 6.42     | 1152.51 | 6.42       | 1152.51 | 6.42     | 1152.51 | 6.42     | 1152.51 | 6.42     |
| 6.426678 | 1152.51 | 6.426678   | 1152.51 | 6.426678 | 1152.51 | 6.426678 | 1152.51 | 6.426678 |
| 6.43     | 1152.51 | 6.43       | 1152.51 | 6.43     | 1152.51 | 6.43     | 1152.51 | 6.43     |
| 6.436678 | 1152.51 | 6.436678   | 1152.51 | 6.436678 | 1152.51 | 6.436678 | 1152.51 | 6.436678 |
| 6.44     | 1152.51 | 6.44       | 1152.51 | 6.44     | 1152.51 | 6.44     | 1152.51 | 6.44     |
| 6.446678 | 1152.51 | 6.446678   | 1152.51 | 6.446678 | 1152.51 | 6.446678 | 1152.51 | 6.446678 |
| 6.45     | 1152.51 | 6.45       | 1152.51 | 6.45     | 1152.51 | 6.45     | 1152.51 | 6.45     |
| 6.456678 | 1152.51 | 6.456678   | 1152.51 | 6.456678 | 1152.51 | 6.456678 | 1152.51 | 6.456678 |
| 6.46     | 1152.51 | 6.46       | 1152.51 | 6.46     | 1152.51 | 6.46     | 1152.51 | 6.46     |
| 6.466678 | 1152.51 | 6.466678   | 1152.51 | 6.466678 | 1152.51 | 6.466678 | 1152.51 | 6.466678 |
| 6.47     | 1152.51 | 6.47       | 1152.51 | 6.47     | 1152.51 | 6.47     | 1152.51 | 6.47     |
| 6.476678 | 1152.51 | 6.476678   | 1152.51 | 6.476678 | 1152.51 | 6.476678 | 1152.51 | 6.476678 |
| 6.48     | 1152.51 | 6.48       | 1152.51 | 6.48     | 1152.51 | 6.48     | 1152.51 | 6.48     |
| 6.486678 | 1152.51 | 6.486678   | 1152.51 | 6.486678 | 1152.51 | 6.486678 | 1152.51 | 6.486678 |
| 6.49     | 1152.51 | 6.49       | 1152.51 | 6.49     | 1152.51 | 6.49     | 1152.51 | 6.49     |
| 6.496678 | 1152.51 | 6.496678   | 1152.51 | 6.496678 | 1152.51 | 6.496678 | 1152.51 | 6.496678 |
| 6.5      | 1152.51 | 6.5        | 1152.51 | 6.5      | 1152.51 | 6.5      | 1152.51 | 6.5      |
| 6.506678 | 1152.51 | 6.506678   | 1152.51 | 6.506678 | 1152.51 | 6.506678 | 1152.51 | 6.506678 |
| 6.51     | 1152.51 | 6.51       | 1152.51 | 6.51     | 1152.51 | 6.51     | 1152.51 | 6.51     |
| 6.516678 | 1152.51 | 6.516678</ |         |          |         |          |         |          |



|          |         |          |         |          |         |          |         |          |
|----------|---------|----------|---------|----------|---------|----------|---------|----------|
| 6.56     | 1152.51 | 6.56     | 1152.51 | 6.56     | 1152.51 | 6.56     | 1152.51 | 6.56     |
| 6.566678 | 1152.51 | 6.566678 | 1152.51 | 6.566678 | 1152.51 | 6.566678 | 1152.51 | 6.566678 |
| 6.57     | 1152.51 | 6.57     | 1152.51 | 6.57     | 1152.51 | 6.57     | 1152.51 | 6.57     |
| 6.576678 | 1152.51 | 6.576678 | 1152.51 | 6.576678 | 1152.51 | 6.576678 | 1152.51 | 6.576678 |
| 6.58     | 1152.51 | 6.58     | 1152.51 | 6.58     | 1152.51 | 6.58     | 1152.51 | 6.58     |
| 6.586678 | 1152.51 | 6.586678 | 1152.51 | 6.586678 | 1152.51 | 6.586678 | 1152.51 | 6.586678 |
| 6.59     | 1152.51 | 6.59     | 1152.51 | 6.59     | 1152.51 | 6.59     | 1152.51 | 6.59     |
| 6.596678 | 1152.51 | 6.596678 | 1152.51 | 6.596678 | 1152.51 | 6.596678 | 1152.51 | 6.596678 |
| 6.6      | 1152.51 | 6.6      | 1152.51 | 6.6      | 1152.51 | 6.6      | 1152.51 | 6.6      |
| 6.606678 | 1152.51 | 6.606678 | 1152.51 | 6.606678 | 1152.51 | 6.606678 | 1152.51 | 6.606678 |
| 6.61     | 1152.51 | 6.61     | 1152.51 | 6.61     | 1152.51 | 6.61     | 1152.51 | 6.61     |
| 6.616678 | 1152.51 | 6.616678 | 1152.51 | 6.616678 | 1152.51 | 6.616678 | 1152.51 | 6.616678 |
| 6.62     | 1152.51 | 6.62     | 1152.51 | 6.62     | 1152.51 | 6.62     | 1152.51 | 6.62     |
| 6.626678 | 1152.51 | 6.626678 | 1152.51 | 6.626678 | 1152.51 | 6.626678 | 1152.51 | 6.626678 |
| 6.63     | 1152.51 | 6.63     | 1152.51 | 6.63     | 1152.51 | 6.63     | 1152.51 | 6.63     |
| 6.636678 | 1152.51 | 6.636678 | 1152.51 | 6.636678 | 1152.51 | 6.636678 | 1152.51 | 6.636678 |
| 6.64     | 1152.51 | 6.64     | 1152.51 | 6.64     | 1152.51 | 6.64     | 1152.51 | 6.64     |
| 6.646678 | 1152.51 | 6.646678 | 1152.51 | 6.646678 | 1152.51 | 6.646678 | 1152.51 | 6.646678 |
| 6.65     | 1152.51 | 6.65     | 1152.51 | 6.65     | 1152.51 | 6.65     | 1152.51 | 6.65     |
| 6.656678 | 1152.51 | 6.656678 | 1152.51 | 6.656678 | 1152.51 | 6.656678 | 1152.51 | 6.656678 |
| 6.66     | 1152.51 | 6.66     | 1152.51 | 6.66     | 1152.51 | 6.66     | 1152.51 | 6.66     |
| 6.666678 | 1152.51 | 6.666678 | 1152.51 | 6.666678 | 1152.51 | 6.666678 | 1152.51 | 6.666678 |
| 6.67     | 1152.51 | 6.67     | 1152.51 | 6.67     | 1152.51 | 6.67     | 1152.51 | 6.67     |
| 6.676678 | 1152.51 | 6.676678 | 1152.51 | 6.676678 | 1152.51 | 6.676678 | 1152.51 | 6.676678 |
| 6.68     | 1152.51 | 6.68     | 1152.51 | 6.68     | 1152.51 | 6.68     | 1152.51 | 6.68     |
| 6.686678 | 1152.51 | 6.686678 | 1152.51 | 6.686678 | 1152.51 | 6.686678 | 1152.51 | 6.686678 |
| 6.69     | 1152.51 | 6.69     | 1152.51 | 6.69     | 1152.51 | 6.69     | 1152.51 | 6.69     |
| 6.696678 | 1152.51 | 6.696678 | 1152.51 | 6.696678 | 1152.51 | 6.696678 | 1152.51 | 6.696678 |
| 6.7      | 1152.51 | 6.7      | 1152.51 | 6.7      | 1152.51 | 6.7      | 1152.51 | 6.7      |
| 6.706678 | 1152.51 | 6.706678 | 1152.51 | 6.706678 | 1152.51 | 6.706678 | 1152.51 | 6.706678 |
| 6.71     | 1152.51 | 6.71     | 1152.51 | 6.71     | 1152.51 | 6.71     | 1152.51 | 6.71     |
| 6.716678 | 1152.51 | 6.716678 | 1152.51 | 6.716678 | 1152.51 | 6.716678 | 1152.51 | 6.716678 |
| 6.72     | 1152.51 | 6.72     | 1152.51 | 6.72     | 1152.51 | 6.72     | 1152.51 | 6.72     |
| 6.726678 | 1152.51 | 6.726678 | 1152.51 | 6.726678 | 1152.51 | 6.726678 | 1152.51 | 6.726678 |
| 6.73     | 1152.51 | 6.73     | 1152.51 | 6.73     | 1152.51 | 6.73     | 1152.51 | 6.73     |
| 6.736678 | 1152.51 | 6.736678 | 1152.51 | 6.736678 | 1152.51 | 6.736678 | 1152.51 | 6.736678 |
| 6.74     | 1152.51 | 6.74     | 1152.51 | 6.74     | 1152.51 | 6.74     | 1152.51 | 6.74     |
| 6.746678 | 1152.51 | 6.746678 | 1152.51 | 6.746678 | 1152.51 | 6.746678 | 1152.51 | 6.746678 |
| 6.75     | 1152.51 | 6.75     | 1152.51 | 6.75     | 1152.51 | 6.75     | 1152.51 | 6.75     |
| 6.756678 | 1152.51 | 6.756678 | 1152.51 | 6.756678 | 1152.51 | 6.756678 | 1152.51 | 6.756678 |
| 6.76     | 1152.51 | 6.76     | 1152.51 | 6.76     | 1152.51 | 6.76     | 1152.51 | 6.76     |
| 6.766678 | 1152.51 | 6.766678 | 1152.51 | 6.766678 | 1152.51 | 6.766678 | 1152.51 | 6.766678 |
| 6.77     | 1152.51 | 6.77     | 1152.51 | 6.77     | 1152.51 | 6.77     | 1152.51 | 6.77     |
| 6.776678 | 1152.51 | 6.776678 | 1152.51 | 6.776678 | 1152.51 | 6.776678 | 1152.51 | 6.776678 |
| 6.78     | 1152.51 | 6.78     | 1152.51 | 6.78     | 1152.51 | 6.78     | 1152.51 | 6.78     |
| 6.786678 | 1152.51 | 6.786678 | 1152.51 | 6.786678 | 1152.51 | 6.786678 | 1152.51 | 6.786678 |
| 6.79     | 1152.51 | 6.79     | 1152.51 | 6.79     | 1152.51 | 6.79     | 1152.51 | 6.79     |

|          |         |          |         |          |         |          |         |          |
|----------|---------|----------|---------|----------|---------|----------|---------|----------|
| 6.796678 | 1152.51 | 6.796678 | 1152.51 | 6.796678 | 1152.51 | 6.796678 | 1152.51 | 6.796678 |
| 6.8      | 1152.51 | 6.8      | 1152.51 | 6.8      | 1152.51 | 6.8      | 1152.51 | 6.8      |
| 6.806678 | 1152.51 | 6.806678 | 1152.51 | 6.806678 | 1152.51 | 6.806678 | 1152.51 | 6.806678 |
| 6.81     | 1152.51 | 6.81     | 1152.51 | 6.81     | 1152.51 | 6.81     | 1152.51 | 6.81     |
| 6.816678 | 1152.51 | 6.816678 | 1152.51 | 6.816678 | 1152.51 | 6.816678 | 1152.51 | 6.816678 |
| 6.82     | 1152.51 | 6.82     | 1152.51 | 6.82     | 1152.51 | 6.82     | 1152.51 | 6.82     |
| 6.826678 | 1152.51 | 6.826678 | 1152.51 | 6.826678 | 1152.51 | 6.826678 | 1152.51 | 6.826678 |
| 6.83     | 1152.51 | 6.83     | 1152.51 | 6.83     | 1152.51 | 6.83     | 1152.51 | 6.83     |
| 6.836678 | 1152.51 | 6.836678 | 1152.51 | 6.836678 | 1152.51 | 6.836678 | 1152.51 | 6.836678 |
| 6.84     | 1152.51 | 6.84     | 1152.51 | 6.84     | 1152.51 | 6.84     | 1152.51 | 6.84     |
| 6.846678 | 1152.51 | 6.846678 | 1152.51 | 6.846678 | 1152.51 | 6.846678 | 1152.51 | 6.846678 |
| 6.85     | 1152.51 | 6.85     | 1152.51 | 6.85     | 1152.51 | 6.85     | 1152.51 | 6.85     |
| 6.856678 | 1152.51 | 6.856678 | 1152.51 | 6.856678 | 1152.51 | 6.856678 | 1152.51 | 6.856678 |
| 6.86     | 1152.51 | 6.86     | 1152.51 | 6.86     | 1152.51 | 6.86     | 1152.51 | 6.86     |
| 6.866678 | 1152.51 | 6.866678 | 1152.51 | 6.866678 | 1152.51 | 6.866678 | 1152.51 | 6.866678 |
| 6.87     | 1152.51 | 6.87     | 1152.51 | 6.87     | 1152.51 | 6.87     | 1152.51 | 6.87     |
| 6.876678 | 1152.51 | 6.876678 | 1152.51 | 6.876678 | 1152.51 | 6.876678 | 1152.51 | 6.876678 |
| 6.88     | 1152.51 | 6.88     | 1152.51 | 6.88     | 1152.51 | 6.88     | 1152.51 | 6.88     |
| 6.886678 | 1152.51 | 6.886678 | 1152.51 | 6.886678 | 1152.51 | 6.886678 | 1152.51 | 6.886678 |
| 6.89     | 1152.51 | 6.89     | 1152.51 | 6.89     | 1152.51 | 6.89     | 1152.51 | 6.89     |
| 6.896678 | 1152.51 | 6.896678 | 1152.51 | 6.896678 | 1152.51 | 6.896678 | 1152.51 | 6.896678 |
| 6.9      | 1152.51 | 6.9      | 1152.51 | 6.9      | 1152.51 | 6.9      | 1152.51 | 6.9      |
| 6.906678 | 1152.51 | 6.906678 | 1152.51 | 6.906678 | 1152.51 | 6.906678 | 1152.51 | 6.906678 |
| 6.91     | 1152.51 | 6.91     | 1152.51 | 6.91     | 1152.51 | 6.91     | 1152.51 | 6.91     |
| 6.916678 | 1152.51 | 6.916678 | 1152.51 | 6.916678 | 1152.51 | 6.916678 | 1152.51 | 6.916678 |
| 6.92     | 1152.51 | 6.92     | 1152.51 | 6.92     | 1152.51 | 6.92     | 1152.51 | 6.92     |
| 6.926678 | 1152.51 | 6.926678 | 1152.51 | 6.926678 | 1152.51 | 6.926678 | 1152.51 | 6.926678 |
| 6.93     | 1152.51 | 6.93     | 1152.51 | 6.93     | 1152.51 | 6.93     | 1152.51 | 6.93     |
| 6.936678 | 1152.51 | 6.936678 | 1152.51 | 6.936678 | 1152.51 | 6.936678 | 1152.51 | 6.936678 |
| 6.94     | 1152.51 | 6.94     | 1152.51 | 6.94     | 1152.51 | 6.94     | 1152.51 | 6.94     |
| 6.946678 | 1152.51 | 6.946678 | 1152.51 | 6.946678 | 1152.51 | 6.946678 | 1152.51 | 6.946678 |
| 6.95     | 1152.51 | 6.95     | 1152.51 | 6.95     | 1152.51 | 6.95     | 1152.51 | 6.95     |
| 6.956678 | 1152.51 | 6.956678 | 1152.51 | 6.956678 | 1152.51 | 6.956678 | 1152.51 | 6.956678 |
| 6.96     | 1152.51 | 6.96     | 1152.51 | 6.96     | 1152.51 | 6.96     | 1152.51 | 6.96     |
| 6.966678 | 1152.51 | 6.966678 | 1152.51 | 6.966678 | 1152.51 | 6.966678 | 1152.51 | 6.966678 |
| 6.97     | 1152.51 | 6.97     | 1152.51 | 6.97     | 1152.51 | 6.97     | 1152.51 | 6.97     |
| 6.976678 | 1152.51 | 6.976678 | 1152.51 | 6.976678 | 1152.51 | 6.976678 | 1152.51 | 6.976678 |
| 6.98     | 1152.51 | 6.98     | 1152.51 | 6.98     | 1152.51 | 6.98     | 1152.51 | 6.98     |
| 6.986678 | 1152.51 | 6.986678 | 1152.51 | 6.986678 | 1152.51 | 6.986678 | 1152.51 | 6.986678 |
| 6.99     | 1152.51 | 6.99     | 1152.51 | 6.99     | 1152.51 | 6.99     | 1152.51 | 6.99     |
| 6.996678 | 1152.51 | 6.996678 | 1152.51 | 6.996678 | 1152.51 | 6.996678 | 1152.51 | 6.996678 |
| 7        | 1152.51 | 7        | 1152.51 | 7        | 1152.51 | 7        | 1152.51 | 7        |
| 7.006678 | 1152.51 | 7.006678 | 1152.51 | 7.006678 | 1152.51 | 7.006678 | 1152.51 | 7.006678 |
| 7.01     | 1152.51 | 7.01     | 1152.51 | 7.01     | 1152.51 | 7.01     | 1152.51 | 7.01     |
| 7.016678 | 1152.51 | 7.016678 | 1152.51 | 7.016678 | 1152.51 | 7.016678 | 1152.51 | 7.016678 |
| 7.02     | 1152.51 | 7.02     | 1152.51 | 7.02     | 1152.51 | 7.02     | 1152.51 | 7.02     |
| 7.026678 | 1152.51 | 7.026678 | 1152.51 | 7.026678 | 1152.51 | 7.026678 | 1152.51 | 7.026678 |

|          |         |          |         |          |         |          |         |          |
|----------|---------|----------|---------|----------|---------|----------|---------|----------|
| 7.03     | 1152.51 | 7.03     | 1152.51 | 7.03     | 1152.51 | 7.03     | 1152.51 | 7.03     |
| 7.036678 | 1152.51 | 7.036678 | 1152.51 | 7.036678 | 1152.51 | 7.036678 | 1152.51 | 7.036678 |
| 7.04     | 1152.51 | 7.04     | 1152.51 | 7.04     | 1152.51 | 7.04     | 1152.51 | 7.04     |
| 7.046678 | 1152.51 | 7.046678 | 1152.51 | 7.046678 | 1152.51 | 7.046678 | 1152.51 | 7.046678 |
| 7.05     | 1152.51 | 7.05     | 1152.51 | 7.05     | 1152.51 | 7.05     | 1152.51 | 7.05     |
| 7.056678 | 1152.51 | 7.056678 | 1152.51 | 7.056678 | 1152.51 | 7.056678 | 1152.51 | 7.056678 |
| 7.06     | 1152.51 | 7.06     | 1152.51 | 7.06     | 1152.51 | 7.06     | 1152.51 | 7.06     |
| 7.066678 | 1152.51 | 7.066678 | 1152.51 | 7.066678 | 1152.51 | 7.066678 | 1152.51 | 7.066678 |
| 7.07     | 1152.51 | 7.07     | 1152.51 | 7.07     | 1152.51 | 7.07     | 1152.51 | 7.07     |
| 7.076678 | 1152.51 | 7.076678 | 1152.51 | 7.076678 | 1152.51 | 7.076678 | 1152.51 | 7.076678 |
| 7.08     | 1152.51 | 7.08     | 1152.51 | 7.08     | 1152.51 | 7.08     | 1152.51 | 7.08     |
| 7.086678 | 1152.51 | 7.086678 | 1152.51 | 7.086678 | 1152.51 | 7.086678 | 1152.51 | 7.086678 |
| 7.09     | 1152.51 | 7.09     | 1152.51 | 7.09     | 1152.51 | 7.09     | 1152.51 | 7.09     |
| 7.096678 | 1152.51 | 7.096678 | 1152.51 | 7.096678 | 1152.51 | 7.096678 | 1152.51 | 7.096678 |
| 7.1      | 1152.51 | 7.1      | 1152.51 | 7.1      | 1152.51 | 7.1      | 1152.51 | 7.1      |
| 7.106678 | 1152.51 | 7.106678 | 1152.51 | 7.106678 | 1152.51 | 7.106678 | 1152.51 | 7.106678 |
| 7.11     | 1152.51 | 7.11     | 1152.51 | 7.11     | 1152.51 | 7.11     | 1152.51 | 7.11     |
| 7.116678 | 1152.51 | 7.116678 | 1152.51 | 7.116678 | 1152.51 | 7.116678 | 1152.51 | 7.116678 |
| 7.12     | 1152.51 | 7.12     | 1152.51 | 7.12     | 1152.51 | 7.12     | 1152.51 | 7.12     |
| 7.126678 | 1152.51 | 7.126678 | 1152.51 | 7.126678 | 1152.51 | 7.126678 | 1152.51 | 7.126678 |
| 7.13     | 1152.51 | 7.13     | 1152.51 | 7.13     | 1152.51 | 7.13     | 1152.51 | 7.13     |
| 7.136678 | 1152.51 | 7.136678 | 1152.51 | 7.136678 | 1152.51 | 7.136678 | 1152.51 | 7.136678 |
| 7.14     | 1152.51 | 7.14     | 1152.51 | 7.14     | 1152.51 | 7.14     | 1152.51 | 7.14     |
| 7.146678 | 1152.51 | 7.146678 | 1152.51 | 7.146678 | 1152.51 | 7.146678 | 1152.51 | 7.146678 |
| 7.15     | 1152.51 | 7.15     | 1152.51 | 7.15     | 1152.51 | 7.15     | 1152.51 | 7.15     |
| 7.156678 | 1152.51 | 7.156678 | 1152.51 | 7.156678 | 1152.51 | 7.156678 | 1152.51 | 7.156678 |
| 7.16     | 1152.51 | 7.16     | 1152.51 | 7.16     | 1152.51 | 7.16     | 1152.51 | 7.16     |
| 7.166678 | 1152.51 | 7.166678 | 1152.51 | 7.166678 | 1152.51 | 7.166678 | 1152.51 | 7.166678 |
| 7.17     | 1152.51 | 7.17     | 1152.51 | 7.17     | 1152.51 | 7.17     | 1152.51 | 7.17     |
| 7.176678 | 1152.51 | 7.176678 | 1152.51 | 7.176678 | 1152.51 | 7.176678 | 1152.51 | 7.176678 |
| 7.18     | 1152.51 | 7.18     | 1152.51 | 7.18     | 1152.51 | 7.18     | 1152.51 | 7.18     |
| 7.186678 | 1152.51 | 7.186678 | 1152.51 | 7.186678 | 1152.51 | 7.186678 | 1152.51 | 7.186678 |
| 7.19     | 1152.51 | 7.19     | 1152.51 | 7.19     | 1152.51 | 7.19     | 1152.51 | 7.19     |
| 7.196678 | 1152.51 | 7.196678 | 1152.51 | 7.196678 | 1152.51 | 7.196678 | 1152.51 | 7.196678 |
| 7.2      | 1152.51 | 7.2      | 1152.51 | 7.2      | 1152.51 | 7.2      | 1152.51 | 7.2      |
| 7.206678 | 1152.51 | 7.206678 | 1152.51 | 7.206678 | 1152.51 | 7.206678 | 1152.51 | 7.206678 |
| 7.21     | 1152.51 | 7.21     | 1152.51 | 7.21     | 1152.51 | 7.21     | 1152.51 | 7.21     |
| 7.216678 | 1152.51 | 7.216678 | 1152.51 | 7.216678 | 1152.51 | 7.216678 | 1152.51 | 7.216678 |
| 7.22     | 1152.51 | 7.22     | 1152    |          |         |          |         |          |

|          |         |            |         |          |         |          |         |          |
|----------|---------|------------|---------|----------|---------|----------|---------|----------|
| 7.266678 | 1152.51 | 7.266678   | 1152.51 | 7.266678 | 1152.51 | 7.266678 | 1152.51 | 7.266678 |
| 7.27     | 1152.51 | 7.27       | 1152.51 | 7.27     | 1152.51 | 7.27     | 1152.51 | 7.27     |
| 7.276678 | 1152.51 | 7.276678   | 1152.51 | 7.276678 | 1152.51 | 7.276678 | 1152.51 | 7.276678 |
| 7.28     | 1152.51 | 7.28       | 1152.51 | 7.28     | 1152.51 | 7.28     | 1152.51 | 7.28     |
| 7.286678 | 1152.51 | 7.286678   | 1152.51 | 7.286678 | 1152.51 | 7.286678 | 1152.51 | 7.286678 |
| 7.29     | 1152.51 | 7.29       | 1152.51 | 7.29     | 1152.51 | 7.29     | 1152.51 | 7.29     |
| 7.296678 | 1152.51 | 7.296678   | 1152.51 | 7.296678 | 1152.51 | 7.296678 | 1152.51 | 7.296678 |
| 7.3      | 1152.51 | 7.3        | 1152.51 | 7.3      | 1152.51 | 7.3      | 1152.51 | 7.3      |
| 7.306678 | 1152.51 | 7.306678   | 1152.51 | 7.306678 | 1152.51 | 7.306678 | 1152.51 | 7.306678 |
| 7.31     | 1152.51 | 7.31       | 1152.51 | 7.31     | 1152.51 | 7.31     | 1152.51 | 7.31     |
| 7.316678 | 1152.51 | 7.316678   | 1152.51 | 7.316678 | 1152.51 | 7.316678 | 1152.51 | 7.316678 |
| 7.32     | 1152.51 | 7.32       | 1152.51 | 7.32     | 1152.51 | 7.32     | 1152.51 | 7.32     |
| 7.326678 | 1152.51 | 7.326678   | 1152.51 | 7.326678 | 1152.51 | 7.326678 | 1152.51 | 7.326678 |
| 7.33     | 1152.51 | 7.33       | 1152.51 | 7.33     | 1152.51 | 7.33     | 1152.51 | 7.33     |
| 7.336678 | 1152.51 | 7.336678   | 1152.51 | 7.336678 | 1152.51 | 7.336678 | 1152.51 | 7.336678 |
| 7.34     | 1152.51 | 7.34       | 1152.51 | 7.34     | 1152.51 | 7.34     | 1152.51 | 7.34     |
| 7.346678 | 1152.51 | 7.346678   | 1152.51 | 7.346678 | 1152.51 | 7.346678 | 1152.51 | 7.346678 |
| 7.35     | 1152.51 | 7.35       | 1152.51 | 7.35     | 1152.51 | 7.35     | 1152.51 | 7.35     |
| 7.356678 | 1152.51 | 7.356678   | 1152.51 | 7.356678 | 1152.51 | 7.356678 | 1152.51 | 7.356678 |
| 7.36     | 1152.51 | 7.36       | 1152.51 | 7.36     | 1152.51 | 7.36     | 1152.51 | 7.36     |
| 7.366678 | 1152.51 | 7.366678   | 1152.51 | 7.366678 | 1152.51 | 7.366678 | 1152.51 | 7.366678 |
| 7.37     | 1152.51 | 7.37       | 1152.51 | 7.37     | 1152.51 | 7.37     | 1152.51 | 7.37     |
| 7.376678 | 1152.51 | 7.376678   | 1152.51 | 7.376678 | 1152.51 | 7.376678 | 1152.51 | 7.376678 |
| 7.38     | 1152.51 | 7.38       | 1152.51 | 7.38     | 1152.51 | 7.38     | 1152.51 | 7.38     |
| 7.386678 | 1152.51 | 7.386678   | 1152.51 | 7.386678 | 1152.51 | 7.386678 | 1152.51 | 7.386678 |
| 7.39     | 1152.51 | 7.39       | 1152.51 | 7.39     | 1152.51 | 7.39     | 1152.51 | 7.39     |
| 7.396678 | 1152.51 | 7.396678   | 1152.51 | 7.396678 | 1152.51 | 7.396678 | 1152.51 | 7.396678 |
| 7.4      | 1152.51 | 7.4        | 1152.51 | 7.4      | 1152.51 | 7.4      | 1152.51 | 7.4      |
| 7.406678 | 1152.51 | 7.406678   | 1152.51 | 7.406678 | 1152.51 | 7.406678 | 1152.51 | 7.406678 |
| 7.41     | 1152.51 | 7.41       | 1152.51 | 7.41     | 1152.51 | 7.41     | 1152.51 | 7.41     |
| 7.416678 | 1152.51 | 7.416678   | 1152.51 | 7.416678 | 1152.51 | 7.416678 | 1152.51 | 7.416678 |
| 7.42     | 1152.51 | 7.42       | 1152.51 | 7.42     | 1152.51 | 7.42     | 1152.51 | 7.42     |
| 7.426678 | 1152.51 | 7.426678   | 1152.51 | 7.426678 | 1152.51 | 7.426678 | 1152.51 | 7.426678 |
| 7.43     | 1152.51 | 7.43       | 1152.51 | 7.43     | 1152.51 | 7.43     | 1152.51 | 7.43     |
| 7.436678 | 1152.51 | 7.436678   | 1152.51 | 7.436678 | 1152.51 | 7.436678 | 1152.51 | 7.436678 |
| 7.44     | 1152.51 | 7.44       | 1152.51 | 7.44     | 1152.51 | 7.44     | 1152.51 | 7.44     |
| 7.446678 | 1152.51 | 7.446678   | 1152.51 | 7.446678 | 1152.51 | 7.446678 | 1152.51 | 7.446678 |
| 7.45     | 1152.51 | 7.45       | 1152.51 | 7.45     | 1152.51 | 7.45     | 1152.51 | 7.45     |
| 7.456678 | 1152.51 | 7.456678</ |         |          |         |          |         |          |

|          |         |          |         |          |         |          |         |          |
|----------|---------|----------|---------|----------|---------|----------|---------|----------|
| 7.5      | 1152.51 | 7.5      | 1152.51 | 7.5      | 1152.51 | 7.5      | 1152.51 | 7.5      |
| 7.506678 | 1152.51 | 7.506678 | 1152.51 | 7.506678 | 1152.51 | 7.506678 | 1152.51 | 7.506678 |
| 7.51     | 1152.51 | 7.51     | 1152.51 | 7.51     | 1152.51 | 7.51     | 1152.51 | 7.51     |
| 7.516678 | 1152.51 | 7.516678 | 1152.51 | 7.516678 | 1152.51 | 7.516678 | 1152.51 | 7.516678 |
| 7.52     | 1152.51 | 7.52     | 1152.51 | 7.52     | 1152.51 | 7.52     | 1152.51 | 7.52     |
| 7.526678 | 1152.51 | 7.526678 | 1152.51 | 7.526678 | 1152.51 | 7.526678 | 1152.51 | 7.526678 |
| 7.53     | 1152.51 | 7.53     | 1152.51 | 7.53     | 1152.51 | 7.53     | 1152.51 | 7.53     |
| 7.536678 | 1152.51 | 7.536678 | 1152.51 | 7.536678 | 1152.51 | 7.536678 | 1152.51 | 7.536678 |
| 7.54     | 1152.51 | 7.54     | 1152.51 | 7.54     | 1152.51 | 7.54     | 1152.51 | 7.54     |
| 7.546678 | 1152.51 | 7.546678 | 1152.51 | 7.546678 | 1152.51 | 7.546678 | 1152.51 | 7.546678 |
| 7.55     | 1152.51 | 7.55     | 1152.51 | 7.55     | 1152.51 | 7.55     | 1152.51 | 7.55     |
| 7.556678 | 1152.51 | 7.556678 | 1152.51 | 7.556678 | 1152.51 | 7.556678 | 1152.51 | 7.556678 |
| 7.56     | 1152.51 | 7.56     | 1152.51 | 7.56     | 1152.51 | 7.56     | 1152.51 | 7.56     |
| 7.566678 | 1152.51 | 7.566678 | 1152.51 | 7.566678 | 1152.51 | 7.566678 | 1152.51 | 7.566678 |
| 7.57     | 1152.51 | 7.57     | 1152.51 | 7.57     | 1152.51 | 7.57     | 1152.51 | 7.57     |
| 7.576678 | 1152.51 | 7.576678 | 1152.51 | 7.576678 | 1152.51 | 7.576678 | 1152.51 | 7.576678 |
| 7.58     | 1152.51 | 7.58     | 1152.51 | 7.58     | 1152.51 | 7.58     | 1152.51 | 7.58     |
| 7.586678 | 1152.51 | 7.586678 | 1152.51 | 7.586678 | 1152.51 | 7.586678 | 1152.51 | 7.586678 |
| 7.59     | 1152.51 | 7.59     | 1152.51 | 7.59     | 1152.51 | 7.59     | 1152.51 | 7.59     |
| 7.596678 | 1152.51 | 7.596678 | 1152.51 | 7.596678 | 1152.51 | 7.596678 | 1152.51 | 7.596678 |
| 7.6      | 1152.51 | 7.6      | 1152.51 | 7.6      | 1152.51 | 7.6      | 1152.51 | 7.6      |
| 7.606678 | 1152.51 | 7.606678 | 1152.51 | 7.606678 | 1152.51 | 7.606678 | 1152.51 | 7.606678 |
| 7.61     | 1152.51 | 7.61     | 1152.51 | 7.61     | 1152.51 | 7.61     | 1152.51 | 7.61     |
| 7.616678 | 1152.51 | 7.616678 | 1152.51 | 7.616678 | 1152.51 | 7.616678 | 1152.51 | 7.616678 |
| 7.62     | 1152.51 | 7.62     | 1152.51 | 7.62     | 1152.51 | 7.62     | 1152.51 | 7.62     |
| 7.626678 | 1152.51 | 7.626678 | 1152.51 | 7.626678 | 1152.51 | 7.626678 | 1152.51 | 7.626678 |
| 7.63     | 1152.51 | 7.63     | 1152.51 | 7.63     | 1152.51 | 7.63     | 1152.51 | 7.63     |
| 7.636678 | 1152.51 | 7.636678 | 1152.51 | 7.636678 | 1152.51 | 7.636678 | 1152.51 | 7.636678 |
| 7.64     | 1152.51 | 7.64     | 1152.51 | 7.64     | 1152.51 | 7.64     | 1152.51 | 7.64     |
| 7.646678 | 1152.51 | 7.646678 | 1152.51 | 7.646678 | 1152.51 | 7.646678 | 1152.51 | 7.646678 |
| 7.65     | 1152.51 | 7.65     | 1152.51 | 7.65     | 1152.51 | 7.65     | 1152.51 | 7.65     |
| 7.656678 | 1152.51 | 7.656678 | 1152.51 | 7.656678 | 1152.51 | 7.656678 | 1152.51 | 7.656678 |
| 7.66     | 1152.51 | 7.66     | 1152.51 | 7.66     | 1152.51 | 7.66     | 1152.51 | 7.66     |
| 7.666678 | 1152.51 | 7.666678 | 1152.51 | 7.666678 | 1152.51 | 7.666678 | 1152.51 | 7.666678 |
| 7.67     | 1152.51 | 7.67     | 1152.51 | 7.67     | 1152.51 | 7.67     | 1152.51 | 7.67     |
| 7.676678 | 1152.51 | 7.676678 | 1152.51 | 7.676678 | 1152.51 | 7.676678 | 1152.51 | 7.676678 |
| 7.68     | 1152.51 | 7.68     | 1152.51 | 7.68     | 1152.51 | 7.68     | 1152.51 | 7.68     |
| 7.686678 | 1152.51 | 7.686678 | 1152.51 | 7.686678 | 1152.51 | 7.686678 | 1152.51 | 7.686678 |
| 7.69     | 1152.51 | 7.69     | 1152.51 | 7.69     | 1152.51 | 7.69     | 1152.51 | 7.69     |
| 7.696678 | 1152.51 | 7.696678 | 1152.51 | 7.696678 | 1152.51 | 7.696678 | 1152.51 | 7.696678 |
| 7.7      | 1152.51 | 7.7      | 1152.51 | 7.7      | 1152.51 | 7.7      | 1152.51 | 7.7      |
| 7.706678 | 1152.51 | 7.706678 | 1152.51 | 7.706678 | 1152.51 | 7.706678 | 1152.51 | 7.706678 |
| 7.71     | 1152.51 | 7.71     | 1152.51 | 7.71     | 1152.51 | 7.71     | 1152.51 | 7.71     |
| 7.716678 | 1152.51 | 7.716678 | 1152.51 | 7.716678 | 1152.51 | 7.716678 | 1152.51 | 7.716678 |
| 7.72     | 1152.51 | 7.72     | 1152.51 | 7.72     | 1152.51 | 7.72     | 1152.51 | 7.72     |
| 7.726678 | 1152.51 | 7.726678 | 1152.51 | 7.726678 | 1152.51 | 7.726678 | 1152.51 | 7.726678 |
| 7.73     | 1152.51 | 7.73     | 1152.51 | 7.73     | 1152.51 | 7.73     | 1152.51 | 7.73     |

|          |         |            |         |          |         |          |         |          |
|----------|---------|------------|---------|----------|---------|----------|---------|----------|
| 7.736678 | 1152.51 | 7.736678   | 1152.51 | 7.736678 | 1152.51 | 7.736678 | 1152.51 | 7.736678 |
| 7.74     | 1152.51 | 7.74       | 1152.51 | 7.74     | 1152.51 | 7.74     | 1152.51 | 7.74     |
| 7.746678 | 1152.51 | 7.746678   | 1152.51 | 7.746678 | 1152.51 | 7.746678 | 1152.51 | 7.746678 |
| 7.75     | 1152.51 | 7.75       | 1152.51 | 7.75     | 1152.51 | 7.75     | 1152.51 | 7.75     |
| 7.756678 | 1152.51 | 7.756678   | 1152.51 | 7.756678 | 1152.51 | 7.756678 | 1152.51 | 7.756678 |
| 7.76     | 1152.51 | 7.76       | 1152.51 | 7.76     | 1152.51 | 7.76     | 1152.51 | 7.76     |
| 7.766678 | 1152.51 | 7.766678   | 1152.51 | 7.766678 | 1152.51 | 7.766678 | 1152.51 | 7.766678 |
| 7.77     | 1152.51 | 7.77       | 1152.51 | 7.77     | 1152.51 | 7.77     | 1152.51 | 7.77     |
| 7.776678 | 1152.51 | 7.776678   | 1152.51 | 7.776678 | 1152.51 | 7.776678 | 1152.51 | 7.776678 |
| 7.78     | 1152.51 | 7.78       | 1152.51 | 7.78     | 1152.51 | 7.78     | 1152.51 | 7.78     |
| 7.786678 | 1152.51 | 7.786678   | 1152.51 | 7.786678 | 1152.51 | 7.786678 | 1152.51 | 7.786678 |
| 7.79     | 1152.51 | 7.79       | 1152.51 | 7.79     | 1152.51 | 7.79     | 1152.51 | 7.79     |
| 7.796678 | 1152.51 | 7.796678   | 1152.51 | 7.796678 | 1152.51 | 7.796678 | 1152.51 | 7.796678 |
| 7.8      | 1152.51 | 7.8        | 1152.51 | 7.8      | 1152.51 | 7.8      | 1152.51 | 7.8      |
| 7.806678 | 1152.51 | 7.806678   | 1152.51 | 7.806678 | 1152.51 | 7.806678 | 1152.51 | 7.806678 |
| 7.81     | 1152.51 | 7.81       | 1152.51 | 7.81     | 1152.51 | 7.81     | 1152.51 | 7.81     |
| 7.816678 | 1152.51 | 7.816678   | 1152.51 | 7.816678 | 1152.51 | 7.816678 | 1152.51 | 7.816678 |
| 7.82     | 1152.51 | 7.82       | 1152.51 | 7.82     | 1152.51 | 7.82     | 1152.51 | 7.82     |
| 7.826678 | 1152.51 | 7.826678   | 1152.51 | 7.826678 | 1152.51 | 7.826678 | 1152.51 | 7.826678 |
| 7.83     | 1152.51 | 7.83       | 1152.51 | 7.83     | 1152.51 | 7.83     | 1152.51 | 7.83     |
| 7.836678 | 1152.51 | 7.836678   | 1152.51 | 7.836678 | 1152.51 | 7.836678 | 1152.51 | 7.836678 |
| 7.84     | 1152.51 | 7.84       | 1152.51 | 7.84     | 1152.51 | 7.84     | 1152.51 | 7.84     |
| 7.846678 | 1152.51 | 7.846678   | 1152.51 | 7.846678 | 1152.51 | 7.846678 | 1152.51 | 7.846678 |
| 7.85     | 1152.51 | 7.85       | 1152.51 | 7.85     | 1152.51 | 7.85     | 1152.51 | 7.85     |
| 7.856678 | 1152.51 | 7.856678   | 1152.51 | 7.856678 | 1152.51 | 7.856678 | 1152.51 | 7.856678 |
| 7.86     | 1152.51 | 7.86       | 1152.51 | 7.86     | 1152.51 | 7.86     | 1152.51 | 7.86     |
| 7.866678 | 1152.51 | 7.866678   | 1152.51 | 7.866678 | 1152.51 | 7.866678 | 1152.51 | 7.866678 |
| 7.87     | 1152.51 | 7.87       | 1152.51 | 7.87     | 1152.51 | 7.87     | 1152.51 | 7.87     |
| 7.876678 | 1152.51 | 7.876678   | 1152.51 | 7.876678 | 1152.51 | 7.876678 | 1152.51 | 7.876678 |
| 7.88     | 1152.51 | 7.88       | 1152.51 | 7.88     | 1152.51 | 7.88     | 1152.51 | 7.88     |
| 7.886678 | 1152.51 | 7.886678   | 1152.51 | 7.886678 | 1152.51 | 7.886678 | 1152.51 | 7.886678 |
| 7.89     | 1152.51 | 7.89       | 1152.51 | 7.89     | 1152.51 | 7.89     | 1152.51 | 7.89     |
| 7.896678 | 1152.51 | 7.896678   | 1152.51 | 7.896678 | 1152.51 | 7.896678 | 1152.51 | 7.896678 |
| 7.9      | 1152.51 | 7.9        | 1152.51 | 7.9      | 1152.51 | 7.9      | 1152.51 | 7.9      |
| 7.906678 | 1152.51 | 7.906678   | 1152.51 | 7.906678 | 1152.51 | 7.906678 | 1152.51 | 7.906678 |
| 7.91     | 1152.51 | 7.91       | 1152.51 | 7.91     | 1152.51 | 7.91     | 1152.51 | 7.91     |
| 7.916678 | 1152.51 | 7.916678   | 1152.51 | 7.916678 | 1152.51 | 7.916678 | 1152.51 | 7.916678 |
| 7.92     | 1152.51 | 7.92       | 1152.51 | 7.92     | 1152.51 | 7.92     | 1152.51 | 7.92     |
| 7.926678 | 1152.51 | 7.926678</ |         |          |         |          |         |          |

|          |         |          |         |          |         |          |         |          |
|----------|---------|----------|---------|----------|---------|----------|---------|----------|
| 7.97     | 1152.51 | 7.97     | 1152.51 | 7.97     | 1152.51 | 7.97     | 1152.51 | 7.97     |
| 7.976678 | 1152.51 | 7.976678 | 1152.51 | 7.976678 | 1152.51 | 7.976678 | 1152.51 | 7.976678 |
| 7.98     | 1152.51 | 7.98     | 1152.51 | 7.98     | 1152.51 | 7.98     | 1152.51 | 7.98     |
| 7.986678 | 1152.51 | 7.986678 | 1152.51 | 7.986678 | 1152.51 | 7.986678 | 1152.51 | 7.986678 |
| 7.99     | 1152.51 | 7.99     | 1152.51 | 7.99     | 1152.51 | 7.99     | 1152.51 | 7.99     |
| 7.996678 | 1152.51 | 7.996678 | 1152.51 | 7.996678 | 1152.51 | 7.996678 | 1152.51 | 7.996678 |
| 8        | 1152.51 | 8        | 1152.51 | 8        | 1152.51 | 8        | 1152.51 | 8        |
| 8.006678 | 1152.51 | 8.006678 | 1152.51 | 8.006678 | 1152.51 | 8.006678 | 1152.51 | 8.006678 |
| 8.01     | 1152.51 | 8.01     | 1152.51 | 8.01     | 1152.51 | 8.01     | 1152.51 | 8.01     |
| 8.016678 | 1152.51 | 8.016678 | 1152.51 | 8.016678 | 1152.51 | 8.016678 | 1152.51 | 8.016678 |
| 8.02     | 1152.51 | 8.02     | 1152.51 | 8.02     | 1152.51 | 8.02     | 1152.51 | 8.02     |
| 8.026678 | 1152.51 | 8.026678 | 1152.51 | 8.026678 | 1152.51 | 8.026678 | 1152.51 | 8.026678 |
| 8.03     | 1152.51 | 8.03     | 1152.51 | 8.03     | 1152.51 | 8.03     | 1152.51 | 8.03     |
| 8.036678 | 1152.51 | 8.036678 | 1152.51 | 8.036678 | 1152.51 | 8.036678 | 1152.51 | 8.036678 |
| 8.04     | 1152.51 | 8.04     | 1152.51 | 8.04     | 1152.51 | 8.04     | 1152.51 | 8.04     |
| 8.046678 | 1152.51 | 8.046678 | 1152.51 | 8.046678 | 1152.51 | 8.046678 | 1152.51 | 8.046678 |
| 8.05     | 1152.51 | 8.05     | 1152.51 | 8.05     | 1152.51 | 8.05     | 1152.51 | 8.05     |
| 8.056678 | 1152.51 | 8.056678 | 1152.51 | 8.056678 | 1152.51 | 8.056678 | 1152.51 | 8.056678 |
| 8.06     | 1152.51 | 8.06     | 1152.51 | 8.06     | 1152.51 | 8.06     | 1152.51 | 8.06     |
| 8.066678 | 1152.51 | 8.066678 | 1152.51 | 8.066678 | 1152.51 | 8.066678 | 1152.51 | 8.066678 |
| 8.07     | 1152.51 | 8.07     | 1152.51 | 8.07     | 1152.51 | 8.07     | 1152.51 | 8.07     |
| 8.076678 | 1152.51 | 8.076678 | 1152.51 | 8.076678 | 1152.51 | 8.076678 | 1152.51 | 8.076678 |
| 8.08     | 1152.51 | 8.08     | 1152.51 | 8.08     | 1152.51 | 8.08     | 1152.51 | 8.08     |
| 8.086678 | 1152.51 | 8.086678 | 1152.51 | 8.086678 | 1152.51 | 8.086678 | 1152.51 | 8.086678 |
| 8.09     | 1152.51 | 8.09     | 1152.51 | 8.09     | 1152.51 | 8.09     | 1152.51 | 8.09     |
| 8.096678 | 1152.51 | 8.096678 | 1152.51 | 8.096678 | 1152.51 | 8.096678 | 1152.51 | 8.096678 |
| 8.1      | 1152.51 | 8.1      | 1152.51 | 8.1      | 1152.51 | 8.1      | 1152.51 | 8.1      |
| 8.106678 | 1152.51 | 8.106678 | 1152.51 | 8.106678 | 1152.51 | 8.106678 | 1152.51 | 8.106678 |
| 8.11     | 1152.51 | 8.11     | 1152.51 | 8.11     | 1152.51 | 8.11     | 1152.51 | 8.11     |
| 8.116678 | 1152.51 | 8.116678 | 1152.51 | 8.116678 | 1152.51 | 8.116678 | 1152.51 | 8.116678 |
| 8.12     | 1152.51 | 8.12     | 1152.51 | 8.12     | 1152.51 | 8.12     | 1152.51 | 8.12     |
| 8.126678 | 1152.51 | 8.126678 | 1152.51 | 8.126678 | 1152.51 | 8.126678 | 1152.51 | 8.126678 |
| 8.13     | 1152.51 | 8.13     | 1152.51 | 8.13     | 1152.51 | 8.13     | 1152.51 | 8.13     |
| 8.136678 | 1152.51 | 8.136678 | 1152.51 | 8.136678 | 1152.51 | 8.136678 | 1152.51 | 8.136678 |
| 8.14     | 1152.51 | 8.14     | 1152.51 | 8.14     | 1152.51 | 8.14     | 1152.51 | 8.14     |
| 8.146678 | 1152.51 | 8.146678 | 1152.51 | 8.146678 | 1152.51 | 8.146678 | 1152.51 | 8.146678 |
| 8.15     | 1152.51 | 8.15     | 1152.51 | 8.15     | 1152.51 | 8.15     | 1152.51 | 8.15     |
| 8.156678 | 1152.51 | 8.156678 | 1152.51 | 8.156678 | 1152.51 | 8.156678 | 1152.51 | 8.156678 |
| 8.16     | 1152.51 | 8.16     | 1152.51 | 8.16     | 1152.51 | 8.16     | 1152.51 | 8.16     |
| 8.166678 | 1152.51 | 8.166678 | 1152.51 | 8.166678 | 1152.51 | 8.166678 | 1152.51 | 8.166678 |
| 8.17     | 1152.51 | 8.17     | 1152.51 | 8.17     | 1152.51 | 8.17     | 1152.51 | 8.17     |
| 8.176678 | 1152.51 | 8.176678 | 1152.51 | 8.176678 | 1152.51 | 8.176678 | 1152.51 | 8.176678 |
| 8.18     | 1152.51 | 8.18     | 1152.51 | 8.18     | 1152.51 | 8.18     | 1152.51 | 8.18     |
| 8.186678 | 1152.51 | 8.186678 | 1152.51 | 8.186678 | 1152.51 | 8.186678 | 1152.51 | 8.186678 |
| 8.19     | 1152.51 | 8.19     | 1152.51 | 8.19     | 1152.51 | 8.19     | 1152.51 | 8.19     |
| 8.196678 | 1152.51 | 8.196678 | 1152.51 | 8.196678 | 1152.51 | 8.196678 | 1152.51 | 8.196678 |
| 8.2      | 1152.51 | 8.2      | 1152.51 | 8.2      | 1152.51 | 8.2      | 1152.51 | 8.2      |

[illegible]



|          |         |          |         |          |         |          |         |          |
|----------|---------|----------|---------|----------|---------|----------|---------|----------|
| 8.44     | 1152.51 | 8.44     | 1152.51 | 8.44     | 1152.51 | 8.44     | 1152.51 | 8.44     |
| 8.446678 | 1152.51 | 8.446678 | 1152.51 | 8.446678 | 1152.51 | 8.446678 | 1152.51 | 8.446678 |
| 8.45     | 1152.51 | 8.45     | 1152.51 | 8.45     | 1152.51 | 8.45     | 1152.51 | 8.45     |
| 8.456678 | 1152.51 | 8.456678 | 1152.51 | 8.456678 | 1152.51 | 8.456678 | 1152.51 | 8.456678 |
| 8.46     | 1152.51 | 8.46     | 1152.51 | 8.46     | 1152.51 | 8.46     | 1152.51 | 8.46     |
| 8.466678 | 1152.51 | 8.466678 | 1152.51 | 8.466678 | 1152.51 | 8.466678 | 1152.51 | 8.466678 |
| 8.47     | 1152.51 | 8.47     | 1152.51 | 8.47     | 1152.51 | 8.47     | 1152.51 | 8.47     |
| 8.476678 | 1152.51 | 8.476678 | 1152.51 | 8.476678 | 1152.51 | 8.476678 | 1152.51 | 8.476678 |
| 8.48     | 1152.51 | 8.48     | 1152.51 | 8.48     | 1152.51 | 8.48     | 1152.51 | 8.48     |
| 8.486678 | 1152.51 | 8.486678 | 1152.51 | 8.486678 | 1152.51 | 8.486678 | 1152.51 | 8.486678 |
| 8.49     | 1152.51 | 8.49     | 1152.51 | 8.49     | 1152.51 | 8.49     | 1152.51 | 8.49     |
| 8.496678 | 1152.51 | 8.496678 | 1152.51 | 8.496678 | 1152.51 | 8.496678 | 1152.51 | 8.496678 |
| 8.5      | 1152.51 | 8.5      | 1152.51 | 8.5      | 1152.51 | 8.5      | 1152.51 | 8.5      |
| 8.506678 | 1152.51 | 8.506678 | 1152.51 | 8.506678 | 1152.51 | 8.506678 | 1152.51 | 8.506678 |
| 8.51     | 1152.51 | 8.51     | 1152.51 | 8.51     | 1152.51 | 8.51     | 1152.51 | 8.51     |
| 8.516678 | 1152.51 | 8.516678 | 1152.51 | 8.516678 | 1152.51 | 8.516678 | 1152.51 | 8.516678 |
| 8.52     | 1152.51 | 8.52     | 1152.51 | 8.52     | 1152.51 | 8.52     | 1152.51 | 8.52     |
| 8.526678 | 1152.51 | 8.526678 | 1152.51 | 8.526678 | 1152.51 | 8.526678 | 1152.51 | 8.526678 |
| 8.53     | 1152.51 | 8.53     | 1152.51 | 8.53     | 1152.51 | 8.53     | 1152.51 | 8.53     |
| 8.536678 | 1152.51 | 8.536678 | 1152.51 | 8.536678 | 1152.51 | 8.536678 | 1152.51 | 8.536678 |
| 8.54     | 1152.51 | 8.54     | 1152.51 | 8.54     | 1152.51 | 8.54     | 1152.51 | 8.54     |
| 8.546678 | 1152.51 | 8.546678 | 1152.51 | 8.546678 | 1152.51 | 8.546678 | 1152.51 | 8.546678 |
| 8.55     | 1152.51 | 8.55     | 1152.51 | 8.55     | 1152.51 | 8.55     | 1152.51 | 8.55     |
| 8.556678 | 1152.51 | 8.556678 | 1152.51 | 8.556678 | 1152.51 | 8.556678 | 1152.51 | 8.556678 |
| 8.56     | 1152.51 | 8.56     | 1152.51 | 8.56     | 1152.51 | 8.56     | 1152.51 | 8.56     |
| 8.566678 | 1152.51 | 8.566678 | 1152.51 | 8.566678 | 1152.51 | 8.566678 | 1152.51 | 8.566678 |
| 8.57     | 1152.51 | 8.57     | 1152.51 | 8.57     | 1152.51 | 8.57     | 1152.51 | 8.57     |
| 8.576678 | 1152.51 | 8.576678 | 1152.51 | 8.576678 | 1152.51 | 8.576678 | 1152.51 | 8.576678 |
| 8.58     | 1152.51 | 8.58     | 1152.51 | 8.58     | 1152.51 | 8.58     | 1152.51 | 8.58     |
| 8.586678 | 1152.51 | 8.586678 | 1152.51 | 8.586678 | 1152.51 | 8.586678 | 1152.51 | 8.586678 |
| 8.59     | 1152.51 | 8.59     | 1152.51 | 8.59     | 1152.51 | 8.59     | 1152.51 | 8.59     |
| 8.596678 | 1152.51 | 8.596678 | 1152.51 | 8.596678 | 1152.51 | 8.596678 | 1152.51 | 8.596678 |
| 8.6      | 1152.51 | 8.6      | 1152.51 | 8.6      | 1152.51 | 8.6      | 1152.51 | 8.6      |
| 8.606678 | 1152.51 | 8.606678 | 1152.51 | 8.606678 | 1152.51 | 8.606678 | 1152.51 | 8.606678 |
| 8.61     | 1152.51 | 8.61     | 1152.51 | 8.61     | 1152.51 | 8.61     | 1152.51 | 8.61     |
| 8.616678 | 1152.51 | 8.616678 | 1152.51 | 8.616678 | 1152.51 | 8.616678 | 1152.51 | 8.616678 |
| 8.62     | 1152.51 | 8.62     | 1152.51 | 8.62     | 1152.51 | 8.62     | 1152.51 | 8.62     |
| 8.626678 | 1152.51 | 8.626678 | 1152.51 | 8.626678 | 1152.51 | 8.626678 | 1152.51 | 8.626678 |
| 8.63     | 1152.51 | 8.63     | 1152    |          |         |          |         |          |

|          |         |            |         |          |         |          |         |          |
|----------|---------|------------|---------|----------|---------|----------|---------|----------|
| 8.676678 | 1152.51 | 8.676678   | 1152.51 | 8.676678 | 1152.51 | 8.676678 | 1152.51 | 8.676678 |
| 8.68     | 1152.51 | 8.68       | 1152.51 | 8.68     | 1152.51 | 8.68     | 1152.51 | 8.68     |
| 8.686678 | 1152.51 | 8.686678   | 1152.51 | 8.686678 | 1152.51 | 8.686678 | 1152.51 | 8.686678 |
| 8.69     | 1152.51 | 8.69       | 1152.51 | 8.69     | 1152.51 | 8.69     | 1152.51 | 8.69     |
| 8.696678 | 1152.51 | 8.696678   | 1152.51 | 8.696678 | 1152.51 | 8.696678 | 1152.51 | 8.696678 |
| 8.7      | 1152.51 | 8.7        | 1152.51 | 8.7      | 1152.51 | 8.7      | 1152.51 | 8.7      |
| 8.706678 | 1152.51 | 8.706678   | 1152.51 | 8.706678 | 1152.51 | 8.706678 | 1152.51 | 8.706678 |
| 8.71     | 1152.51 | 8.71       | 1152.51 | 8.71     | 1152.51 | 8.71     | 1152.51 | 8.71     |
| 8.716678 | 1152.51 | 8.716678   | 1152.51 | 8.716678 | 1152.51 | 8.716678 | 1152.51 | 8.716678 |
| 8.72     | 1152.51 | 8.72       | 1152.51 | 8.72     | 1152.51 | 8.72     | 1152.51 | 8.72     |
| 8.726678 | 1152.51 | 8.726678   | 1152.51 | 8.726678 | 1152.51 | 8.726678 | 1152.51 | 8.726678 |
| 8.73     | 1152.51 | 8.73       | 1152.51 | 8.73     | 1152.51 | 8.73     | 1152.51 | 8.73     |
| 8.736678 | 1152.51 | 8.736678   | 1152.51 | 8.736678 | 1152.51 | 8.736678 | 1152.51 | 8.736678 |
| 8.74     | 1152.51 | 8.74       | 1152.51 | 8.74     | 1152.51 | 8.74     | 1152.51 | 8.74     |
| 8.746678 | 1152.51 | 8.746678   | 1152.51 | 8.746678 | 1152.51 | 8.746678 | 1152.51 | 8.746678 |
| 8.75     | 1152.51 | 8.75       | 1152.51 | 8.75     | 1152.51 | 8.75     | 1152.51 | 8.75     |
| 8.756678 | 1152.51 | 8.756678   | 1152.51 | 8.756678 | 1152.51 | 8.756678 | 1152.51 | 8.756678 |
| 8.76     | 1152.51 | 8.76       | 1152.51 | 8.76     | 1152.51 | 8.76     | 1152.51 | 8.76     |
| 8.766678 | 1152.51 | 8.766678   | 1152.51 | 8.766678 | 1152.51 | 8.766678 | 1152.51 | 8.766678 |
| 8.77     | 1152.51 | 8.77       | 1152.51 | 8.77     | 1152.51 | 8.77     | 1152.51 | 8.77     |
| 8.776678 | 1152.51 | 8.776678   | 1152.51 | 8.776678 | 1152.51 | 8.776678 | 1152.51 | 8.776678 |
| 8.78     | 1152.51 | 8.78       | 1152.51 | 8.78     | 1152.51 | 8.78     | 1152.51 | 8.78     |
| 8.786678 | 1152.51 | 8.786678   | 1152.51 | 8.786678 | 1152.51 | 8.786678 | 1152.51 | 8.786678 |
| 8.79     | 1152.51 | 8.79       | 1152.51 | 8.79     | 1152.51 | 8.79     | 1152.51 | 8.79     |
| 8.796678 | 1152.51 | 8.796678   | 1152.51 | 8.796678 | 1152.51 | 8.796678 | 1152.51 | 8.796678 |
| 8.8      | 1152.51 | 8.8        | 1152.51 | 8.8      | 1152.51 | 8.8      | 1152.51 | 8.8      |
| 8.806678 | 1152.51 | 8.806678   | 1152.51 | 8.806678 | 1152.51 | 8.806678 | 1152.51 | 8.806678 |
| 8.81     | 1152.51 | 8.81       | 1152.51 | 8.81     | 1152.51 | 8.81     | 1152.51 | 8.81     |
| 8.816678 | 1152.51 | 8.816678   | 1152.51 | 8.816678 | 1152.51 | 8.816678 | 1152.51 | 8.816678 |
| 8.82     | 1152.51 | 8.82       | 1152.51 | 8.82     | 1152.51 | 8.82     | 1152.51 | 8.82     |
| 8.826678 | 1152.51 | 8.826678   | 1152.51 | 8.826678 | 1152.51 | 8.826678 | 1152.51 | 8.826678 |
| 8.83     | 1152.51 | 8.83       | 1152.51 | 8.83     | 1152.51 | 8.83     | 1152.51 | 8.83     |
| 8.836678 | 1152.51 | 8.836678   | 1152.51 | 8.836678 | 1152.51 | 8.836678 | 1152.51 | 8.836678 |
| 8.84     | 1152.51 | 8.84       | 1152.51 | 8.84     | 1152.51 | 8.84     | 1152.51 | 8.84     |
| 8.846678 | 1152.51 | 8.846678   | 1152.51 | 8.846678 | 1152.51 | 8.846678 | 1152.51 | 8.846678 |
| 8.85     | 1152.51 | 8.85       | 1152.51 | 8.85     | 1152.51 | 8.85     | 1152.51 | 8.85     |
| 8.856678 | 1152.51 | 8.856678   | 1152.51 | 8.856678 | 1152.51 | 8.856678 | 1152.51 | 8.856678 |
| 8.86     | 1152.51 | 8.86       | 1152.51 | 8.86     | 1152.51 | 8.86     | 1152.51 | 8.86     |
| 8.866678 | 1152.51 | 8.866678</ |         |          |         |          |         |          |

|          |          |          |         |          |         |          |         |          |
|----------|----------|----------|---------|----------|---------|----------|---------|----------|
| 8.91     | 1152.51  | 8.91     | 1152.51 | 8.91     | 1152.51 | 8.91     | 1152.51 | 8.91     |
| 8.916678 | 1152.51  | 8.916678 | 1152.51 | 8.916678 | 1152.51 | 8.916678 | 1152.51 | 8.916678 |
| 8.92     | 1152.51  | 8.92     | 1152.51 | 8.92     | 1152.51 | 8.92     | 1152.51 | 8.92     |
| 8.926678 | 1152.51  | 8.926678 | 1152.51 | 8.926678 | 1152.51 | 8.926678 | 1152.51 | 8.926678 |
| 8.93     | 1152.51  | 8.93     | 1152.51 | 8.93     | 1152.51 | 8.93     | 1152.51 | 8.93     |
| 8.936678 | 1152.51  | 8.936678 | 1152.51 | 8.936678 | 1152.51 | 8.936678 | 1152.51 | 8.936678 |
| 8.94     | 1152.51  | 8.94     | 1152.51 | 8.94     | 1152.51 | 8.94     | 1152.51 | 8.94     |
| 8.946678 | 1152.51  | 8.946678 | 1152.51 | 8.946678 | 1152.51 | 8.946678 | 1152.51 | 8.946678 |
| 8.95     | 1152.51  | 8.95     | 1152.51 | 8.95     | 1152.51 | 8.95     | 1152.51 | 8.95     |
| 8.956678 | 1152.51  | 8.956678 | 1152.51 | 8.956678 | 1152.51 | 8.956678 | 1152.51 | 8.956678 |
| 8.96     | 1152.51  | 8.96     | 1152.51 | 8.96     | 1152.51 | 8.96     | 1152.51 | 8.96     |
| 8.966678 | 1152.51  | 8.966678 | 1152.51 | 8.966678 | 1152.51 | 8.966678 | 1152.51 | 8.966678 |
| 8.97     | 1152.51  | 8.97     | 1152.51 | 8.97     | 1152.51 | 8.97     | 1152.51 | 8.97     |
| 8.976678 | 1152.51  | 8.976678 | 1152.51 | 8.976678 | 1152.51 | 8.976678 | 1152.51 | 8.976678 |
| 8.98     | 1152.51  | 8.98     | 1152.51 | 8.98     | 1152.51 | 8.98     | 1152.51 | 8.98     |
| 8.986678 | 1152.51  | 8.986678 | 1152.51 | 8.986678 | 1152.51 | 8.986678 | 1152.51 | 8.986678 |
| 8.99     | 1152.51  | 8.99     | 1152.51 | 8.99     | 1152.51 | 8.99     | 1152.51 | 8.99     |
| 8.996678 | 1152.51  | 8.996678 | 1152.51 | 8.996678 | 1152.51 | 8.996678 | 1152.51 | 8.996678 |
| 8.998131 | 1152.51  | 8.999732 | 1152.51 | 8.999732 | 1152.51 | 8.999732 | 1152.51 | 8.999732 |
| 8.999221 | 1152.51  | 9.000827 | 1152.51 | 9.000827 | 1152.51 | 9.000827 | 1152.51 | 9.000827 |
| 9.00024  | 1152.51  | 9.00225  | 1152.51 | 9.00225  | 1152.51 | 9.00225  | 1152.51 | 9.00225  |
| 9.001244 | 1152.51  | 9.003299 | 1152.51 | 9.003299 | 1152.51 | 9.003299 | 1152.51 | 9.003299 |
| 9.003287 | 1152.51  | 9.005134 | 1152.51 | 9.005134 | 1152.51 | 9.005134 | 1152.51 | 9.005134 |
| 9.005083 | 1152.51  | 9.00674  | 1152.51 | 9.00674  | 1152.51 | 9.00674  | 1152.51 | 9.00674  |
| 9.007348 | 1152.51  | 9.008186 | 1152.51 | 9.008186 | 1152.51 | 9.008186 | 1152.51 | 9.008186 |
| 9.008714 | 1152.51  | 9.009631 | 1152.51 | 9.009631 | 1152.51 | 9.009631 | 1152.51 | 9.009631 |
| 9.01     | 1152.51  | 9.011242 | 1152.51 | 9.011242 | 1152.51 | 9.011242 | 1152.51 | 9.011242 |
| 9.011097 | 1152.51  | 9.013132 | 1152.51 | 9.013132 | 1152.51 | 9.013132 | 1152.51 | 9.013132 |
| 9.012791 | 1152.51  | 9.014215 | 1152.51 | 9.014215 | 1152.51 | 9.014215 | 1152.51 | 9.014215 |
| 9.014706 | 1152.51  | 9.015298 | 1152.51 | 9.015298 | 1152.51 | 9.015298 | 1152.51 | 9.015298 |
| 9.016621 | 1152.51  | 9.016381 | 1152.51 | 9.016381 | 1152.51 | 9.016381 | 1152.51 | 9.016381 |
| 9.019136 | 1152.51  | 9.017464 | 1152.51 | 9.017464 | 1152.51 | 9.017464 | 1152.51 | 9.017464 |
| 9.020359 | 1152.51  | 9.02     | 1152.51 | 9.02     | 1152.51 | 9.02     | 1152.51 | 9.02     |
| 9.021541 | 1152.51  | 9.021331 | 1152.51 | 9.021331 | 1152.51 | 9.021331 | 1152.51 | 9.021331 |
| 9.0227   | 1152.51  | 9.022559 | 1152.51 | 9.022559 | 1152.51 | 9.022559 | 1152.51 | 9.022559 |
| 9.023713 | 1152.51  | 9.023992 | 1152.51 | 9.023992 | 1152.51 | 9.023992 | 1152.51 | 9.023992 |
| 9.024943 | 1152.51  | 9.025246 | 1152.51 | 9.025246 | 1152.51 | 9.025246 | 1152.51 | 9.025246 |
| 9.026173 | 1152.51  | 9.026661 | 1152.51 | 9.026661 | 1152.51 | 9.026661 | 1152.51 | 9.026661 |
| 9.027404 | 1152.51  | 9.028077 | 1152.51 | 9.028077 | 1152.51 | 9.028077 | 1152.51 | 9.028077 |
| 9.028634 | 1152.51  | 9.02908  | 1152.51 | 9.02908  | 1152.51 | 9.02908  | 1152.51 | 9.02908  |
| 9.029646 | 1152.51  | 9.030377 | 1152.51 | 9.030377 | 1152.51 | 9.030377 | 1152.51 | 9.030377 |
| 9.030731 | 1152.511 | 9.031868 | 1152.51 | 9.031868 | 1152.51 | 9.031868 | 1152.51 | 9.031868 |
| 9.03193  | 1152.511 | 9.033608 | 1152.51 | 9.033608 | 1152.51 | 9.033608 | 1152.51 | 9.033608 |
| 9.03306  | 1152.511 | 9.035027 | 1152.51 | 9.035027 | 1152.51 | 9.035027 | 1152.51 | 9.035027 |
| 9.034095 | 1152.51  | 9.036555 | 1152.51 | 9.036555 | 1152.51 | 9.036555 | 1152.51 | 9.036555 |
| 9.035413 | 1152.509 | 9.038082 | 1152.51 | 9.038082 | 1152.51 | 9.038082 | 1152.51 | 9.038082 |
| 9.036731 | 1152.51  | 9.03961  | 1152.51 | 9.03961  | 1152.51 | 9.03961  | 1152.51 | 9.03961  |

|          |          |          |         |          |         |          |         |          |
|----------|----------|----------|---------|----------|---------|----------|---------|----------|
| 9.038049 | 1152.509 | 9.041084 | 1152.51 | 9.041084 | 1152.51 | 9.041084 | 1152.51 | 9.041084 |
| 9.039778 | 1152.506 | 9.043012 | 1152.51 | 9.043012 | 1152.51 | 9.043012 | 1152.51 | 9.043012 |
| 9.041102 | 1152.505 | 9.045662 | 1152.51 | 9.045662 | 1152.51 | 9.045662 | 1152.51 | 9.045662 |
| 9.042132 | 1152.504 | 9.047349 | 1152.51 | 9.047349 | 1152.51 | 9.047349 | 1152.51 | 9.047349 |
| 9.04355  | 1152.504 | 9.049036 | 1152.51 | 9.049036 | 1152.51 | 9.049036 | 1152.51 | 9.049036 |
| 9.045353 | 1152.501 | 9.050241 | 1152.51 | 9.050241 | 1152.51 | 9.050241 | 1152.51 | 9.050241 |
| 9.047157 | 1152.499 | 9.0517   | 1152.51 | 9.0517   | 1152.51 | 9.0517   | 1152.51 | 9.0517   |
| 9.048961 | 1152.497 | 9.053012 | 1152.51 | 9.053012 | 1152.51 | 9.053012 | 1152.51 | 9.053012 |
| 9.05     | 1152.496 | 9.054817 | 1152.51 | 9.054817 | 1152.51 | 9.054817 | 1152.51 | 9.054817 |
| 9.05116  | 1152.494 | 9.055966 | 1152.51 | 9.055966 | 1152.51 | 9.055966 | 1152.51 | 9.055966 |
| 9.052627 | 1152.492 | 9.057114 | 1152.51 | 9.057114 | 1152.51 | 9.057114 | 1152.51 | 9.057114 |
| 9.054338 | 1152.489 | 9.059124 | 1152.51 | 9.059124 | 1152.51 | 9.059124 | 1152.51 | 9.059124 |
| 9.056692 | 1152.486 | 9.060287 | 1152.51 | 9.060287 | 1152.51 | 9.060287 | 1152.51 | 9.060287 |
| 9.058039 | 1152.484 | 9.061663 | 1152.51 | 9.061663 | 1152.51 | 9.061663 | 1152.51 | 9.061663 |
| 9.059387 | 1152.482 | 9.063011 | 1152.51 | 9.063011 | 1152.51 | 9.063011 | 1152.51 | 9.063011 |
| 9.060668 | 1152.48  | 9.06419  | 1152.51 | 9.06419  | 1152.51 | 9.06419  | 1152.51 | 9.06419  |
| 9.061921 | 1152.478 | 9.066255 | 1152.51 | 9.066255 | 1152.51 | 9.066255 | 1152.51 | 9.066255 |
| 9.063499 | 1152.476 | 9.068319 | 1152.51 | 9.068319 | 1152.51 | 9.068319 | 1152.51 | 9.068319 |
| 9.064972 | 1152.474 | 9.07     | 1152.51 | 9.07     | 1152.51 | 9.07     | 1152.51 | 9.07     |
| 9.066261 | 1152.472 | 9.071146 | 1152.51 | 9.071146 | 1152.51 | 9.071146 | 1152.51 | 9.071146 |
| 9.068517 | 1152.468 | 9.072284 | 1152.51 | 9.072284 | 1152.51 | 9.072284 | 1152.51 | 9.072284 |
| 9.07     | 1152.466 | 9.076314 | 1152.51 | 9.076314 | 1152.51 | 9.076314 | 1152.51 | 9.076314 |
| 9.071048 | 1152.464 | 9.079001 | 1152.51 | 9.079001 | 1152.51 | 9.079001 | 1152.51 | 9.079001 |
| 9.072093 | 1152.463 | 9.080384 | 1152.51 | 9.080384 | 1152.51 | 9.080384 | 1152.51 | 9.080384 |
| 9.075596 | 1152.457 | 9.083072 | 1152.51 | 9.083072 | 1152.51 | 9.083072 | 1152.51 | 9.083072 |
| 9.078247 | 1152.453 | 9.085759 | 1152.51 | 9.085759 | 1152.51 | 9.085759 | 1152.51 | 9.085759 |
| 9.08     | 1152.45  | 9.088178 | 1152.51 | 9.088178 | 1152.51 | 9.088178 | 1152.51 | 9.088178 |
| 9.08303  | 1152.445 | 9.09     | 1152.51 | 9.09     | 1152.51 | 9.09     | 1152.51 | 9.09     |
| 9.085243 | 1152.442 | 9.092765 | 1152.51 | 9.092765 | 1152.51 | 9.092765 | 1152.51 | 9.092765 |
| 9.087456 | 1152.438 | 9.094862 | 1152.51 | 9.094862 | 1152.51 | 9.094862 | 1152.51 | 9.094862 |
| 9.089669 | 1152.435 | 9.09696  | 1152.51 | 9.09696  | 1152.51 | 9.09696  | 1152.51 | 9.09696  |
| 9.092529 | 1152.43  | 9.099058 | 1152.51 | 9.099058 | 1152.51 | 9.099058 | 1152.51 | 9.099058 |
| 9.09462  | 1152.427 | 9.100084 | 1152.51 | 9.1003   | 1152.51 | 9.1003   | 1152.51 | 9.1003   |
| 9.09671  | 1152.424 | 9.101102 | 1152.51 | 9.102397 | 1152.51 | 9.102397 | 1152.51 | 9.102397 |
| 9.098801 | 1152.421 | 9.102217 | 1152.51 | 9.104378 | 1152.51 | 9.104378 | 1152.51 | 9.104378 |
| 9.1      | 1152.419 | 9.103542 | 1152.51 | 9.106358 | 1152.51 | 9.106358 | 1152.51 | 9.106358 |
| 9.102389 | 1152.415 | 9.105242 | 1152.51 | 9.108338 | 1152.51 | 9.108338 | 1152.51 | 9.108338 |
| 9.104369 | 1152.412 | 9.106324 | 1152.51 | 9.11     | 1152.51 | 9.11     | 1152.51 | 9.11     |
| 9.106349 | 1152.409 | 9.108217 | 1152.51 | 9.112263 | 1152.51 | 9.112263 | 1152.51 | 9.112263 |
| 9.108328 | 1152.406 | 9.109835 | 1152.51 | 9.114134 | 1152.51 | 9.114134 | 1152.51 | 9.114134 |
| 9.11     | 1152.403 | 9.111219 | 1152.51 | 9.116004 | 1152.51 | 9.116004 | 1152.51 | 9.116004 |
| 9.112263 | 1152.399 | 9.113081 | 1152.51 | 9.117875 | 1152.51 | 9.117875 | 1152.51 | 9.117875 |
| 9.114133 | 1152.396 | 9.114151 | 1152.51 | 9.12     | 1152.51 | 9.12     | 1152.51 | 9.12     |
| 9.116003 | 1152.393 | 9.115221 | 1152.51 | 9.122138 | 1152.51 | 9.122138 | 1152.51 | 9.122138 |
| 9.117874 | 1152.39  | 9.116291 | 1152.51 | 9.1239   | 1152.51 | 9.1239   | 1152.51 | 9.1239   |
| 9.12     | 1152.387 | 9.117361 | 1152.51 | 9.125663 | 1152.51 | 9.125663 | 1152.51 | 9.125663 |
| 9.122138 | 1152.384 | 9.12     | 1152.51 | 9.127425 | 1152.51 | 9.127425 | 1152.51 | 9.127425 |

|          |          |          |          |          |         |          |         |          |
|----------|----------|----------|----------|----------|---------|----------|---------|----------|
| 9.1239   | 1152.381 | 9.121324 | 1152.51  | 9.13     | 1152.51 | 9.13     | 1152.51 | 9.13     |
| 9.125662 | 1152.378 | 9.122551 | 1152.51  | 9.132014 | 1152.51 | 9.132014 | 1152.51 | 9.132014 |
| 9.127424 | 1152.375 | 9.123983 | 1152.51  | 9.13367  | 1152.51 | 9.13367  | 1152.51 | 9.13367  |
| 9.13     | 1152.371 | 9.125236 | 1152.51  | 9.135326 | 1152.51 | 9.135326 | 1152.51 | 9.135326 |
| 9.132014 | 1152.368 | 9.126651 | 1152.51  | 9.136981 | 1152.51 | 9.136981 | 1152.51 | 9.136981 |
| 9.13367  | 1152.365 | 9.128065 | 1152.51  | 9.14     | 1152.51 | 9.14     | 1152.51 | 9.14     |
| 9.135325 | 1152.363 | 9.129066 | 1152.51  | 9.141892 | 1152.51 | 9.141892 | 1152.51 | 9.141892 |
| 9.136981 | 1152.36  | 9.130066 | 1152.51  | 9.143443 | 1152.51 | 9.143443 | 1152.51 | 9.143443 |
| 9.14     | 1152.355 | 9.13107  | 1152.511 | 9.144994 | 1152.51 | 9.144994 | 1152.51 | 9.144994 |
| 9.141892 | 1152.352 | 9.132421 | 1152.511 | 9.146545 | 1152.51 | 9.146545 | 1152.51 | 9.146545 |
| 9.143443 | 1152.35  | 9.133571 | 1152.51  | 9.15     | 1152.51 | 9.15     | 1152.51 | 9.15     |
| 9.144993 | 1152.347 | 9.135049 | 1152.509 | 9.151772 | 1152.51 | 9.151772 | 1152.51 | 9.151772 |
| 9.146544 | 1152.344 | 9.136526 | 1152.509 | 9.15322  | 1152.51 | 9.15322  | 1152.51 | 9.15322  |
| 9.15     | 1152.339 | 9.138004 | 1152.509 | 9.154668 | 1152.51 | 9.154668 | 1152.51 | 9.154668 |
| 9.151772 | 1152.336 | 9.139482 | 1152.507 | 9.156116 | 1152.51 | 9.156116 | 1152.51 | 9.156116 |
| 9.15322  | 1152.334 | 9.140539 | 1152.505 | 9.16     | 1152.51 | 9.16     | 1152.51 | 9.16     |
| 9.154667 | 1152.331 | 9.141987 | 1152.504 | 9.161655 | 1152.51 | 9.161655 | 1152.51 | 9.161655 |
| 9.156115 | 1152.329 | 9.143798 | 1152.503 | 9.163002 | 1152.51 | 9.163002 | 1152.51 | 9.163002 |
| 9.16     | 1152.323 | 9.145488 | 1152.501 | 9.164349 | 1152.51 | 9.164349 | 1152.51 | 9.164349 |
| 9.161654 | 1152.32  | 9.147177 | 1152.498 | 9.165696 | 1152.51 | 9.165696 | 1152.51 | 9.165696 |
| 9.163001 | 1152.318 | 9.148656 | 1152.497 | 9.17     | 1152.51 | 9.17     | 1152.51 | 9.17     |
| 9.164348 | 1152.316 | 9.14984  | 1152.496 | 9.17154  | 1152.51 | 9.17154  | 1152.51 | 9.17154  |
| 9.165695 | 1152.313 | 9.151417 | 1152.494 | 9.172789 | 1152.51 | 9.172789 | 1152.51 | 9.172789 |
| 9.17     | 1152.306 | 9.152599 | 1152.492 | 9.174038 | 1152.51 | 9.174038 | 1152.51 | 9.174038 |
| 9.171539 | 1152.304 | 9.154226 | 1152.489 | 9.175288 | 1152.51 | 9.175288 | 1152.51 | 9.175288 |
| 9.172789 | 1152.302 | 9.155261 | 1152.488 | 9.179661 | 1152.51 | 9.179661 | 1152.51 | 9.179661 |
| 9.174038 | 1152.3   | 9.156296 | 1152.487 | 9.18121  | 1152.51 | 9.18121  | 1152.51 | 9.18121  |
| 9.175287 | 1152.298 | 9.158108 | 1152.484 | 9.182235 | 1152.51 | 9.182235 | 1152.51 | 9.182235 |
| 9.17966  | 1152.291 | 9.159738 | 1152.482 | 9.18326  | 1152.51 | 9.18326  | 1152.51 | 9.18326  |
| 9.18121  | 1152.288 | 9.160799 | 1152.48  | 9.185053 | 1152.51 | 9.185053 | 1152.51 | 9.185053 |
| 9.182235 | 1152.286 | 9.162289 | 1152.478 | 9.186526 | 1152.51 | 9.186526 | 1152.51 | 9.186526 |
| 9.18326  | 1152.285 | 9.164156 | 1152.475 | 9.187998 | 1152.51 | 9.187998 | 1152.51 | 9.187998 |
| 9.185053 | 1152.282 | 9.165899 | 1152.472 | 9.189471 | 1152.51 | 9.189471 | 1152.51 | 9.189471 |
| 9.186525 | 1152.279 | 9.167424 | 1152.47  | 9.191683 | 1152.51 | 9.191683 | 1152.51 | 9.191683 |
| 9.187997 | 1152.277 | 9.17     | 1152.466 | 9.193155 | 1152.51 | 9.193155 | 1152.51 | 9.193155 |
| 9.189469 | 1152.274 | 9.171015 | 1152.464 | 9.194377 | 1152.51 | 9.194377 | 1152.51 | 9.194377 |
| 9.191682 | 1152.271 | 9.172049 | 1152.463 | 9.195599 | 1152.51 | 9.195599 | 1152.51 | 9.195599 |
| 9.193155 | 1152.268 | 9.173849 | 1152.46  | 9.196821 | 1152.51 | 9.196821 | 1152.51 | 9.196821 |
| 9.194376 | 1152.266 | 9.17523  | 1152.458 | 9.199609 | 1152.51 | 9.19961  | 1152.51 | 9.19961  |
| 9.195597 | 1152.264 | 9.17661  | 1152.455 | 9.200751 | 1152.51 | 9.200854 | 1152.51 | 9.200854 |
| 9.196819 | 1152.262 | 9.18     | 1152.45  | 9.202089 | 1152.51 | 9.203046 | 1152.51 | 9.203046 |
| 9.2      | 1152.257 | 9.181578 | 1152.448 | 9.203392 | 1152.51 | 9.204302 | 1152.51 | 9.204302 |
| 9.201396 | 1152.255 | 9.182958 | 1152.445 | 9.205064 | 1152.51 | 9.205558 | 1152.51 | 9.205558 |
| 9.202617 | 1152.253 | 9.184201 | 1152.443 | 9.206129 | 1152.51 | 9.206813 | 1152.51 | 9.206813 |
| 9.203717 | 1152.251 | 9.185443 | 1152.441 | 9.207991 | 1152.51 | 9.209011 | 1152.51 | 9.209011 |
| 9.204816 | 1152.249 | 9.186685 | 1152.44  | 9.209588 | 1152.51 | 9.210314 | 1152.51 | 9.210314 |
| 9.205915 | 1152.247 | 9.19     | 1152.434 | 9.211195 | 1152.51 | 9.211413 | 1152.51 | 9.211413 |

|          |          |          |          |          |          |          |         |          |
|----------|----------|----------|----------|----------|----------|----------|---------|----------|
| 9.21     | 1152.241 | 9.19142  | 1152.432 | 9.213061 | 1152.51  | 9.212637 | 1152.51 | 9.212637 |
| 9.211256 | 1152.239 | 9.192487 | 1152.43  | 9.214131 | 1152.51  | 9.213739 | 1152.51 | 9.213739 |
| 9.212356 | 1152.237 | 9.193554 | 1152.429 | 9.215201 | 1152.51  | 9.21484  | 1152.51 | 9.21484  |
| 9.214334 | 1152.234 | 9.194621 | 1152.427 | 9.216271 | 1152.51  | 9.215942 | 1152.51 | 9.215942 |
| 9.218502 | 1152.227 | 9.198356 | 1152.421 | 9.217342 | 1152.51  | 9.21787  | 1152.51 | 9.21787  |
| 9.22     | 1152.224 | 9.2      | 1152.419 | 9.22     | 1152.51  | 9.219798 | 1152.51 | 9.219798 |
| 9.221625 | 1152.222 | 9.201031 | 1152.417 | 9.22132  | 1152.51  | 9.221278 | 1152.51 | 9.221278 |
| 9.223675 | 1152.218 | 9.202774 | 1152.414 | 9.222542 | 1152.51  | 9.222394 | 1152.51 | 9.222394 |
| 9.224752 | 1152.216 | 9.204298 | 1152.412 | 9.223967 | 1152.51  | 9.223398 | 1152.51 | 9.223398 |
| 9.22583  | 1152.215 | 9.20555  | 1152.41  | 9.225214 | 1152.51  | 9.224403 | 1152.51 | 9.224403 |
| 9.226907 | 1152.213 | 9.206801 | 1152.408 | 9.226628 | 1152.51  | 9.225408 | 1152.51 | 9.225408 |
| 9.228792 | 1152.21  | 9.208052 | 1152.406 | 9.228042 | 1152.51  | 9.227166 | 1152.51 | 9.227166 |
| 9.23     | 1152.208 | 9.21     | 1152.403 | 9.229049 | 1152.51  | 9.228924 | 1152.51 | 9.228924 |
| 9.231219 | 1152.206 | 9.21143  | 1152.401 | 9.230063 | 1152.51  | 9.23     | 1152.51 | 9.23     |
| 9.232276 | 1152.204 | 9.212681 | 1152.399 | 9.231132 | 1152.511 | 9.23118  | 1152.51 | 9.23118  |
| 9.234102 | 1152.201 | 9.213718 | 1152.397 | 9.232151 | 1152.511 | 9.232214 | 1152.51 | 9.232214 |
| 9.235331 | 1152.199 | 9.214754 | 1152.395 | 9.23328  | 1152.511 | 9.234076 | 1152.51 | 9.234076 |
| 9.236618 | 1152.197 | 9.21579  | 1152.394 | 9.234315 | 1152.509 | 9.235111 | 1152.51 | 9.235111 |
| 9.24     | 1152.191 | 9.22     | 1152.387 | 9.235437 | 1152.509 | 9.24     | 1152.51 | 9.24     |
| 9.241471 | 1152.189 | 9.221184 | 1152.385 | 9.236781 | 1152.509 | 9.241016 | 1152.51 | 9.241016 |
| 9.25     | 1152.175 | 9.222221 | 1152.384 | 9.238566 | 1152.508 | 9.247236 | 1152.51 | 9.247236 |
| 9.251471 | 1152.172 | 9.224086 | 1152.381 | 9.24     | 1152.507 | 9.25     | 1152.51 | 9.25     |
| 9.26     | 1152.158 | 9.228148 | 1152.374 | 9.241648 | 1152.505 | 9.257109 | 1152.51 | 9.257109 |
| 9.261471 | 1152.156 | 9.23     | 1152.371 | 9.243082 | 1152.503 | 9.26     | 1152.51 | 9.26     |
| 9.27     | 1152.142 | 9.231562 | 1152.369 | 9.24455  | 1152.502 | 9.267109 | 1152.51 | 9.267109 |
| 9.271471 | 1152.139 | 9.233513 | 1152.366 | 9.246019 | 1152.5   | 9.27     | 1152.51 | 9.27     |
| 9.28     | 1152.125 | 9.234895 | 1152.363 | 9.247487 | 1152.499 | 9.277109 | 1152.51 | 9.277109 |
| 9.281471 | 1152.123 | 9.23601  | 1152.362 | 9.248956 | 1152.497 | 9.28     | 1152.51 | 9.28     |
| 9.29     | 1152.109 | 9.24     | 1152.355 | 9.25     | 1152.495 | 9.287109 | 1152.51 | 9.287109 |
| 9.291471 | 1152.107 | 9.241275 | 1152.353 | 9.251623 | 1152.493 | 9.29     | 1152.51 | 9.29     |
| 9.3      | 1152.092 | 9.249085 | 1152.34  | 9.252958 | 1152.492 | 9.297109 | 1152.51 | 9.297109 |
| 9.301471 | 1152.09  | 9.251116 | 1152.337 | 9.254793 | 1152.489 | 9.298439 | 1152.51 | 9.3      |
| 9.31     | 1152.076 | 9.258925 | 1152.324 | 9.255961 | 1152.487 | 9.299654 | 1152.51 | 9.307109 |
| 9.311471 | 1152.074 | 9.26     | 1152.323 | 9.257128 | 1152.485 | 9.300669 | 1152.51 | 9.31     |
| 9.32     | 1152.059 | 9.261116 | 1152.321 | 9.259172 | 1152.482 | 9.301793 | 1152.51 | 9.317109 |
| 9.321471 | 1152.057 | 9.268925 | 1152.308 | 9.260292 | 1152.481 | 9.303708 | 1152.51 | 9.32     |
| 9.33     | 1152.043 | 9.27     | 1152.306 | 9.261676 | 1152.479 | 9.304732 | 1152.51 | 9.327109 |
| 9.331471 | 1152.041 | 9.271116 | 1152.305 | 9.263032 | 1152.477 | 9.305755 | 1152.51 | 9.33     |
| 9.34     | 1152.026 | 9.278925 | 1152.292 | 9.264219 | 1152.475 | 9.306778 | 1152.51 | 9.337109 |
| 9.341471 | 1152.024 | 9.28     | 1152.29  | 9.266295 | 1152.472 | 9.308415 | 1152.51 | 9.34     |
| 9.35     | 1152.01  | 9.281116 | 1152.288 | 9.268372 | 1152.469 | 9.31     | 1152.51 | 9.347109 |
| 9.351471 | 1152.007 | 9.288925 | 1152.275 | 9.27     | 1152.466 | 9.311214 | 1152.51 | 9.35     |
| 9.36     | 1151.993 | 9.29     | 1152.274 | 9.271137 | 1152.464 | 9.313124 | 1152.51 | 9.357109 |
| 9.361471 | 1151.991 | 9.291116 | 1152.272 | 9.272398 | 1152.462 | 9.314206 | 1152.51 | 9.36     |
| 9.37     | 1151.977 | 9.298925 | 1152.259 | 9.274686 | 1152.459 | 9.315288 | 1152.51 | 9.367109 |
| 9.371471 | 1151.974 | 9.3      | 1152.257 | 9.28     | 1152.45  | 9.31637  | 1152.51 | 9.37     |
| 9.38     | 1151.96  | 9.301116 | 1152.255 | 9.282614 | 1152.446 | 9.317453 | 1152.51 | 9.377109 |

|          |          |          |          |          |          |          |          |          |
|----------|----------|----------|----------|----------|----------|----------|----------|----------|
| 9.381471 | 1151.958 | 9.308925 | 1152.243 | 9.29     | 1152.434 | 9.32     | 1152.51  | 9.38     |
| 9.39     | 1151.944 | 9.31     | 1152.241 | 9.292614 | 1152.43  | 9.32133  | 1152.51  | 9.387109 |
| 9.391471 | 1151.941 | 9.311116 | 1152.239 | 9.3      | 1152.419 | 9.322558 | 1152.51  | 9.39     |
| 9.4      | 1151.927 | 9.318925 | 1152.226 | 9.302614 | 1152.415 | 9.323991 | 1152.51  | 9.397109 |
| 9.401471 | 1151.925 | 9.32     | 1152.224 | 9.31     | 1152.403 | 9.325245 | 1152.51  | 9.398439 |
| 9.41     | 1151.911 | 9.321116 | 1152.222 | 9.312614 | 1152.399 | 9.326659 | 1152.51  | 9.399654 |
| 9.411471 | 1151.908 | 9.328925 | 1152.21  | 9.32     | 1152.387 | 9.328074 | 1152.51  | 9.400669 |
| 9.42     | 1151.894 | 9.33     | 1152.208 | 9.322614 | 1152.383 | 9.329075 | 1152.51  | 9.401793 |
| 9.421471 | 1151.892 | 9.331116 | 1152.206 | 9.33     | 1152.371 | 9.330128 | 1152.51  | 9.403708 |
| 9.43     | 1151.878 | 9.338925 | 1152.193 | 9.332614 | 1152.367 | 9.33114  | 1152.511 | 9.404732 |
| 9.431471 | 1151.875 | 9.34     | 1152.191 | 9.34     | 1152.355 | 9.332164 | 1152.511 | 9.405755 |
| 9.44     | 1151.861 | 9.341116 | 1152.19  | 9.342614 | 1152.351 | 9.333299 | 1152.51  | 9.406778 |
| 9.441471 | 1151.859 | 9.348925 | 1152.177 | 9.35     | 1152.339 | 9.334426 | 1152.509 | 9.408415 |
| 9.45     | 1151.845 | 9.35     | 1152.175 | 9.352614 | 1152.334 | 9.335862 | 1152.509 | 9.41     |
| 9.451471 | 1151.842 | 9.351116 | 1152.173 | 9.36     | 1152.322 | 9.337297 | 1152.51  | 9.411214 |
| 9.46     | 1151.828 | 9.358925 | 1152.16  | 9.362614 | 1152.318 | 9.338732 | 1152.509 | 9.413124 |
| 9.461471 | 1151.826 | 9.36     | 1152.158 | 9.37     | 1152.306 | 9.34     | 1152.506 | 9.414206 |
| 9.47     | 1151.812 | 9.361116 | 1152.157 | 9.372614 | 1152.302 | 9.341175 | 1152.505 | 9.415288 |
| 9.471471 | 1151.809 | 9.368925 | 1152.144 | 9.38     | 1152.29  | 9.342366 | 1152.504 | 9.41637  |
| 9.48     | 1151.795 | 9.37     | 1152.142 | 9.382614 | 1152.285 | 9.343556 | 1152.503 | 9.417453 |
| 9.481471 | 1151.793 | 9.371116 | 1152.14  | 9.39     | 1152.273 | 9.344747 | 1152.502 | 9.42     |
| 9.49     | 1151.779 | 9.378925 | 1152.127 | 9.392614 | 1152.269 | 9.345788 | 1152.501 | 9.42133  |
| 9.491471 | 1151.776 | 9.38     | 1152.125 | 9.4      | 1152.257 | 9.34683  | 1152.499 | 9.422558 |
| 9.5      | 1151.762 | 9.381116 | 1152.124 | 9.402614 | 1152.253 | 9.347872 | 1152.498 | 9.423991 |
| 9.501471 | 1151.76  | 9.388925 | 1152.111 | 9.41     | 1152.24  | 9.348913 | 1152.497 | 9.425245 |
| 9.51     | 1151.746 | 9.39     | 1152.109 | 9.412614 | 1152.236 | 9.35     | 1152.496 | 9.426659 |
| 9.511471 | 1151.743 | 9.391116 | 1152.107 | 9.42     | 1152.224 | 9.351408 | 1152.494 | 9.428074 |
| 9.52     | 1151.729 | 9.398925 | 1152.094 | 9.422614 | 1152.22  | 9.352603 | 1152.492 | 9.429075 |
| 9.521471 | 1151.727 | 9.4      | 1152.092 | 9.43     | 1152.208 | 9.354245 | 1152.49  | 9.430128 |
| 9.53     | 1151.713 | 9.401116 | 1152.091 | 9.432614 | 1152.203 | 9.35529  | 1152.488 | 9.43114  |
| 9.531471 | 1151.71  | 9.408925 | 1152.078 | 9.44     | 1152.191 | 9.356335 | 1152.487 | 9.432164 |
| 9.54     | 1151.696 | 9.41     | 1152.076 | 9.442614 | 1152.187 | 9.358164 | 1152.484 | 9.433299 |
| 9.541471 | 1151.694 | 9.411116 | 1152.074 | 9.45     | 1152.175 | 9.359993 | 1152.481 | 9.434426 |
| 9.55     | 1151.68  | 9.418925 | 1152.061 | 9.452614 | 1152.17  | 9.361224 | 1152.479 | 9.435862 |
| 9.551471 | 1151.677 | 9.42     | 1152.06  | 9.46     | 1152.158 | 9.362379 | 1152.478 | 9.437297 |
| 9.56     | 1151.663 | 9.421116 | 1152.058 | 9.462614 | 1152.154 | 9.364251 | 1152.475 | 9.438732 |
| 9.561471 | 1151.661 | 9.428925 | 1152.045 | 9.47     | 1152.142 | 9.365998 | 1152.472 | 9.44     |
| 9.57     | 1151.647 | 9.43     | 1152.043 | 9.472614 | 1152.137 | 9.367527 | 1152.47  | 9.441175 |
| 9.571471 | 1151.644 | 9.431116 | 1152.041 | 9.48     | 1152.125 | 9.37     | 1152.466 | 9.442366 |
| 9.58     | 1151.63  | 9.438925 | 1152.028 | 9.482614 | 1152.121 | 9.371018 | 1152.464 | 9.443556 |
| 9.581471 | 1151.628 | 9.44     | 1152.027 | 9.49     | 1152.109 | 9.372062 | 1152.463 | 9.444747 |
| 9.59     | 1151.613 | 9.441116 | 1152.025 | 9.492614 | 1152.104 | 9.375435 | 1152.457 | 9.445788 |
| 9.591471 | 1151.611 | 9.448925 | 1152.012 | 9.5      | 1152.092 | 9.38     | 1152.45  | 9.44683  |
| 9.6      | 1151.597 | 9.45     | 1152.01  | 9.502614 | 1152.088 | 9.383314 | 1152.445 | 9.447872 |
| 9.601471 | 1151.595 | 9.451116 | 1152.008 | 9.51     | 1152.076 | 9.39     | 1152.434 | 9.448913 |
| 9.61     | 1151.58  | 9.458925 | 1151.995 | 9.512614 | 1152.071 | 9.393314 | 1152.429 | 9.45     |
| 9.611471 | 1151.578 | 9.46     | 1151.993 | 9.52     | 1152.059 | 9.4      | 1152.419 | 9.451408 |

|          |          |          |          |          |          |          |          |          |
|----------|----------|----------|----------|----------|----------|----------|----------|----------|
| 9.62     | 1151.564 | 9.461116 | 1151.992 | 9.522614 | 1152.055 | 9.403314 | 1152.413 | 9.452603 |
| 9.621471 | 1151.561 | 9.468925 | 1151.979 | 9.53     | 1152.043 | 9.41     | 1152.403 | 9.454245 |
| 9.63     | 1151.547 | 9.47     | 1151.977 | 9.532614 | 1152.038 | 9.413314 | 1152.398 | 9.45529  |
| 9.631471 | 1151.545 | 9.471116 | 1151.975 | 9.54     | 1152.026 | 9.42     | 1152.387 | 9.456335 |
| 9.64     | 1151.531 | 9.478925 | 1151.962 | 9.542614 | 1152.022 | 9.423314 | 1152.382 | 9.458164 |
| 9.641471 | 1151.528 | 9.48     | 1151.96  | 9.55     | 1152.01  | 9.43     | 1152.371 | 9.459993 |
| 9.65     | 1151.514 | 9.481116 | 1151.958 | 9.552614 | 1152.005 | 9.433314 | 1152.366 | 9.461224 |
| 9.651471 | 1151.512 | 9.488925 | 1151.946 | 9.56     | 1151.993 | 9.44     | 1152.355 | 9.462379 |
| 9.66     | 1151.498 | 9.49     | 1151.944 | 9.562614 | 1151.989 | 9.443314 | 1152.35  | 9.464251 |
| 9.661471 | 1151.495 | 9.491116 | 1151.942 | 9.57     | 1151.977 | 9.45     | 1152.339 | 9.465998 |
| 9.67     | 1151.481 | 9.498925 | 1151.93  | 9.572614 | 1151.972 | 9.453314 | 1152.333 | 9.467527 |
| 9.671471 | 1151.479 | 9.5      | 1151.928 | 9.58     | 1151.96  | 9.46     | 1152.322 | 9.47     |
| 9.68     | 1151.465 | 9.501116 | 1151.926 | 9.582614 | 1151.956 | 9.463314 | 1152.317 | 9.471018 |
| 9.681471 | 1151.462 | 9.508925 | 1151.912 | 9.59     | 1151.944 | 9.47     | 1152.306 | 9.472062 |
| 9.69     | 1151.448 | 9.51     | 1151.91  | 9.592614 | 1151.939 | 9.473314 | 1152.301 | 9.475435 |
| 9.691471 | 1151.446 | 9.511116 | 1151.908 | 9.6      | 1151.927 | 9.48     | 1152.29  | 9.48     |
| 9.7      | 1151.432 | 9.518925 | 1151.897 | 9.602614 | 1151.923 | 9.483314 | 1152.284 | 9.483314 |
| 9.701471 | 1151.429 | 9.52     | 1151.895 | 9.61     | 1151.911 | 9.49     | 1152.273 | 9.49     |
| 9.71     | 1151.415 | 9.521116 | 1151.894 | 9.612614 | 1151.906 | 9.493314 | 1152.268 | 9.493314 |
| 9.711471 | 1151.413 | 9.528925 | 1151.88  | 9.62     | 1151.894 | 9.5      | 1152.257 | 9.5      |
| 9.72     | 1151.399 | 9.53     | 1151.878 | 9.622614 | 1151.89  | 9.503314 | 1152.252 | 9.503314 |
| 9.721471 | 1151.396 | 9.531116 | 1151.875 | 9.63     | 1151.878 | 9.51     | 1152.241 | 9.51     |
| 9.73     | 1151.382 | 9.538925 | 1151.861 | 9.632614 | 1151.873 | 9.513314 | 1152.235 | 9.513314 |
| 9.731471 | 1151.38  | 9.54     | 1151.86  | 9.64     | 1151.861 | 9.52     | 1152.224 | 9.52     |
| 9.74     | 1151.366 | 9.541116 | 1151.859 | 9.642614 | 1151.857 | 9.523314 | 1152.219 | 9.523314 |
| 9.741471 | 1151.363 | 9.548925 | 1151.849 | 9.65     | 1151.845 | 9.53     | 1152.208 | 9.53     |
| 9.75     | 1151.349 | 9.55     | 1151.848 | 9.652614 | 1151.84  | 9.533314 | 1152.202 | 9.533314 |
| 9.751471 | 1151.347 | 9.551116 | 1151.846 | 9.66     | 1151.828 | 9.54     | 1152.191 | 9.54     |
| 9.76     | 1151.333 | 9.558925 | 1151.83  | 9.662614 | 1151.824 | 9.543314 | 1152.186 | 9.543314 |
| 9.761471 | 1151.33  | 9.56     | 1151.826 | 9.67     | 1151.812 | 9.55     | 1152.175 | 9.55     |
| 9.77     | 1151.316 | 9.561116 | 1151.823 | 9.672614 | 1151.807 | 9.553314 | 1152.169 | 9.553314 |
| 9.771471 | 1151.314 | 9.568925 | 1151.809 | 9.68     | 1151.795 | 9.56     | 1152.158 | 9.56     |
| 9.78     | 1151.299 | 9.57     | 1151.81  | 9.682614 | 1151.791 | 9.563314 | 1152.153 | 9.563314 |
| 9.781471 | 1151.297 | 9.571116 | 1151.812 | 9.69     | 1151.778 | 9.57     | 1152.142 | 9.57     |
| 9.79     | 1151.283 | 9.578925 | 1151.809 | 9.692614 | 1151.774 | 9.573314 | 1152.136 | 9.573314 |
| 9.791471 | 1151.281 | 9.58     | 1151.804 | 9.7      | 1151.762 | 9.58     | 1152.125 | 9.58     |
| 9.8      | 1151.266 | 9.581116 | 1151.797 | 9.702614 | 1151.758 | 9.583314 | 1152.12  | 9.583314 |
| 9.801471 | 1151.264 | 9.588144 | 1151.78  | 9.71     | 1151.745 | 9.59     | 1152.109 | 9.59     |
| 9.81     | 1151.25  | 9.59     | 1151.777 | 9.712614 | 1151.741 | 9.593314 | 1152.103 | 9.593314 |
| 9.811471 | 1151.247 | 9.591004 | 1151.776 | 9.72     | 1151.729 | 9.6      | 1152.092 | 9.6      |
| 9.82     | 1151.233 | 9.598033 | 1151.766 | 9.722614 | 1151.725 | 9.603314 | 1152.087 | 9.603314 |
| 9.821471 | 1151.231 | 9.6      | 1151.764 | 9.73     | 1151.712 | 9.61     | 1152.076 | 9.61     |
| 9.83     | 1151.217 | 9.601004 | 1151.762 | 9.732614 | 1151.708 | 9.613314 | 1152.07  | 9.613314 |
| 9.831471 | 1151.214 | 9.608033 | 1151.75  | 9.74     | 1151.696 | 9.62     | 1152.059 | 9.62     |
| 9.84     | 1151.2   | 9.61     | 1151.745 | 9.742614 | 1151.692 | 9.623314 | 1152.054 | 9.623314 |
| 9.841471 | 1151.198 | 9.611004 | 1151.743 | 9.75     | 1151.679 | 9.63     | 1152.043 | 9.63     |
| 9.85     | 1151.184 | 9.618033 | 1151.73  | 9.752614 | 1151.675 | 9.633314 | 1152.037 | 9.633314 |



|          |          |          |          |          |          |          |          |          |
|----------|----------|----------|----------|----------|----------|----------|----------|----------|
| 9.851471 | 1151.181 | 9.62     | 1151.729 | 9.76     | 1151.663 | 9.64     | 1152.026 | 9.64     |
| 9.86     | 1151.167 | 9.621004 | 1151.728 | 9.762614 | 1151.659 | 9.643314 | 1152.021 | 9.643314 |
| 9.861471 | 1151.165 | 9.628033 | 1151.72  | 9.77     | 1151.646 | 9.65     | 1152.01  | 9.65     |
| 9.87     | 1151.151 | 9.63     | 1151.715 | 9.772614 | 1151.642 | 9.653314 | 1152.004 | 9.653314 |
| 9.871471 | 1151.148 | 9.631004 | 1151.712 | 9.78     | 1151.63  | 9.66     | 1151.993 | 9.66     |
| 9.88     | 1151.134 | 9.638033 | 1151.696 | 9.782614 | 1151.625 | 9.663314 | 1151.988 | 9.663314 |
| 9.881471 | 1151.132 | 9.64     | 1151.693 | 9.79     | 1151.613 | 9.67     | 1151.977 | 9.67     |
| 9.89     | 1151.118 | 9.641004 | 1151.692 | 9.792614 | 1151.609 | 9.673314 | 1151.971 | 9.673314 |
| 9.891471 | 1151.115 | 9.648033 | 1151.684 | 9.8      | 1151.597 | 9.68     | 1151.96  | 9.68     |
| 9.9      | 1151.101 | 9.65     | 1151.682 | 9.802614 | 1151.592 | 9.683314 | 1151.955 | 9.683314 |
| 9.901471 | 1151.099 | 9.651004 | 1151.681 | 9.81     | 1151.58  | 9.69     | 1151.944 | 9.69     |
| 9.91     | 1151.085 | 9.658033 | 1151.668 | 9.812614 | 1151.576 | 9.693314 | 1151.938 | 9.693314 |
| 9.911471 | 1151.082 | 9.66     | 1151.662 | 9.82     | 1151.564 | 9.7      | 1151.927 | 9.7      |
| 9.92     | 1151.068 | 9.661004 | 1151.659 | 9.822614 | 1151.559 | 9.703314 | 1151.922 | 9.703314 |
| 9.921471 | 1151.066 | 9.668033 | 1151.645 | 9.83     | 1151.547 | 9.71     | 1151.911 | 9.71     |
| 9.93     | 1151.052 | 9.67     | 1151.646 | 9.832614 | 1151.543 | 9.713314 | 1151.905 | 9.713314 |
| 9.931471 | 1151.049 | 9.671004 | 1151.646 | 9.84     | 1151.531 | 9.72     | 1151.894 | 9.72     |
| 9.94     | 1151.035 | 9.678033 | 1151.64  | 9.842614 | 1151.526 | 9.723314 | 1151.889 | 9.723314 |
| 9.941471 | 1151.033 | 9.68     | 1151.633 | 9.85     | 1151.514 | 9.73     | 1151.878 | 9.73     |
| 9.95     | 1151.018 | 9.681004 | 1151.63  | 9.852614 | 1151.51  | 9.733314 | 1151.872 | 9.733314 |
| 9.951471 | 1151.016 | 9.688033 | 1151.61  | 9.86     | 1151.498 | 9.74     | 1151.861 | 9.74     |
| 9.96     | 1151.002 | 9.69     | 1151.608 | 9.862614 | 1151.493 | 9.743314 | 1151.856 | 9.743314 |
| 9.961471 | 1150.999 | 9.691004 | 1151.608 | 9.87     | 1151.481 | 9.75     | 1151.845 | 9.75     |
| 9.97     | 1150.985 | 9.698033 | 1151.604 | 9.872614 | 1151.477 | 9.753314 | 1151.839 | 9.753314 |
| 9.971471 | 1150.983 | 9.7      | 1151.603 | 9.88     | 1151.465 | 9.76     | 1151.828 | 9.76     |
| 9.98     | 1150.969 | 9.701004 | 1151.601 | 9.882614 | 1151.46  | 9.763314 | 1151.823 | 9.763314 |
| 9.981471 | 1150.966 | 9.708033 | 1151.585 | 9.89     | 1151.448 | 9.77     | 1151.812 | 9.77     |
| 9.99     | 1150.952 | 9.71     | 1151.577 | 9.892614 | 1151.444 | 9.773314 | 1151.806 | 9.773314 |
| 9.991471 | 1150.95  | 9.711004 | 1151.574 | 9.9      | 1151.431 | 9.78     | 1151.795 | 9.78     |
| 9.993603 | 1150.946 | 9.718033 | 1151.561 | 9.902614 | 1151.427 | 9.783314 | 1151.79  | 9.783314 |
| 9.995203 | 1150.944 | 9.72     | 1151.564 | 9.91     | 1151.415 | 9.79     | 1151.779 | 9.79     |
| 9.998001 | 1150.939 | 9.721004 | 1151.565 | 9.912614 | 1151.411 | 9.793314 | 1151.773 | 9.793314 |
| 9.999125 | 1150.937 | 9.728033 | 1151.562 | 9.92     | 1151.398 | 9.8      | 1151.762 | 9.8      |
| 10.00025 | 1150.935 | 9.73     | 1151.552 | 9.922614 | 1151.394 | 9.803314 | 1151.757 | 9.803314 |
| 10.00138 | 1150.933 | 9.731004 | 1151.547 | 9.93     | 1151.382 | 9.81     | 1151.745 | 9.81     |
| 10.0027  | 1150.931 | 9.73733  | 1151.533 | 9.932614 | 1151.378 | 9.813314 | 1151.74  | 9.813314 |
| 10.00424 | 1150.929 | 9.74     | 1151.53  | 9.94     | 1151.365 | 9.82     | 1151.729 | 9.82     |
| 10.00558 | 1150.927 | 9.74723  | 1151.52  | 9.942614 | 1151.361 | 9.823314 | 1151.724 | 9.823314 |
| 10.00674 | 1150.925 | 9.75     | 1151.516 | 9.95     | 1151.349 | 9.83     | 1151.712 | 9.83     |
| 10.00791 | 1150.923 | 9.75723  | 1151.502 | 9.952614 | 1151.345 | 9.833314 | 1151.707 | 9.833314 |
| 10.00907 | 1150.921 | 9.76     | 1151.497 | 9.96     | 1151.332 | 9.84     | 1151.696 | 9.84     |
| 10.01009 | 1150.919 | 9.76723  | 1151.485 | 9.962614 | 1151.328 | 9.843314 | 1151.69  | 9.843314 |
| 10.01155 | 1150.917 | 9.77     | 1151.482 | 9.97     | 1151.316 | 9.85     | 1151.679 | 9.85     |
| 10.01336 | 1150.914 | 9.77723  | 1151.471 | 9.972614 | 1151.311 | 9.853314 | 1151.674 | 9.853314 |
| 10.01505 | 1150.911 | 9.78     | 1151.465 | 9.98     | 1151.299 | 9.86     | 1151.663 | 9.86     |
| 10.01819 | 1150.906 | 9.78723  | 1151.451 | 9.982614 | 1151.295 | 9.863314 | 1151.657 | 9.863314 |
| 10.02    | 1150.903 | 9.79     | 1151.448 | 9.99     | 1151.283 | 9.87     | 1151.646 | 9.87     |

|          |          |          |          |          |          |          |          |          |
|----------|----------|----------|----------|----------|----------|----------|----------|----------|
| 10.02109 | 1150.901 | 9.79723  | 1151.437 | 9.992614 | 1151.278 | 9.873314 | 1151.641 | 9.873314 |
| 10.02262 | 1150.898 | 9.8      | 1151.433 | 9.994461 | 1151.275 | 9.88     | 1151.63  | 9.88     |
| 10.02387 | 1150.896 | 9.80723  | 1151.419 | 9.995846 | 1151.273 | 9.883314 | 1151.624 | 9.883314 |
| 10.02499 | 1150.894 | 9.81     | 1151.415 | 9.998269 | 1151.269 | 9.89     | 1151.613 | 9.89     |
| 10.02611 | 1150.893 | 9.81723  | 1151.403 | 9.999732 | 1151.267 | 9.893314 | 1151.608 | 9.893314 |
| 10.02723 | 1150.891 | 9.82     | 1151.399 | 10.00088 | 1151.265 | 9.9      | 1151.597 | 9.9      |
| 10.02836 | 1150.889 | 9.82723  | 1151.387 | 10.00226 | 1151.262 | 9.903314 | 1151.591 | 9.903314 |
| 10.02941 | 1150.887 | 9.83     | 1151.382 | 10.00347 | 1151.26  | 9.91     | 1151.58  | 9.91     |
| 10.03041 | 1150.885 | 9.83723  | 1151.37  | 10.00558 | 1151.257 | 9.913314 | 1151.575 | 9.913314 |
| 10.03166 | 1150.883 | 9.84     | 1151.366 | 10.00675 | 1151.255 | 9.92     | 1151.564 | 9.92     |
| 10.03286 | 1150.88  | 9.84723  | 1151.354 | 10.00791 | 1151.253 | 9.923314 | 1151.558 | 9.923314 |
| 10.03419 | 1150.877 | 9.85     | 1151.349 | 10.00907 | 1151.251 | 9.93     | 1151.547 | 9.93     |
| 10.0354  | 1150.873 | 9.85723  | 1151.337 | 10.01009 | 1151.249 | 9.933314 | 1151.542 | 9.933314 |
| 10.03675 | 1150.869 | 9.86     | 1151.332 | 10.01155 | 1151.247 | 9.94     | 1151.531 | 9.94     |
| 10.03809 | 1150.863 | 9.86723  | 1151.321 | 10.01336 | 1151.244 | 9.943314 | 1151.525 | 9.943314 |
| 10.03944 | 1150.857 | 9.87     | 1151.316 | 10.01506 | 1151.241 | 9.95     | 1151.514 | 9.95     |
| 10.04074 | 1150.851 | 9.87723  | 1151.304 | 10.01819 | 1151.236 | 9.953314 | 1151.509 | 9.953314 |
| 10.04191 | 1150.844 | 9.88     | 1151.299 | 10.02    | 1151.233 | 9.96     | 1151.498 | 9.96     |
| 10.04312 | 1150.838 | 9.88723  | 1151.287 | 10.02109 | 1151.231 | 9.963314 | 1151.492 | 9.963314 |
| 10.0442  | 1150.832 | 9.89     | 1151.283 | 10.02262 | 1151.229 | 9.97     | 1151.481 | 9.97     |
| 10.04559 | 1150.823 | 9.89723  | 1151.271 | 10.02387 | 1151.227 | 9.973314 | 1151.476 | 9.973314 |
| 10.04707 | 1150.814 | 9.9      | 1151.266 | 10.02499 | 1151.225 | 9.98     | 1151.465 | 9.98     |
| 10.0481  | 1150.807 | 9.90723  | 1151.254 | 10.02611 | 1151.223 | 9.983314 | 1151.459 | 9.983314 |
| 10.04939 | 1150.799 | 9.91     | 1151.25  | 10.02723 | 1151.221 | 9.99     | 1151.448 | 9.99     |
| 10.05041 | 1150.792 | 9.91723  | 1151.238 | 10.02836 | 1151.219 | 9.993314 | 1151.443 | 9.993314 |
| 10.05142 | 1150.784 | 9.92     | 1151.234 | 10.0294  | 1151.218 | 9.994985 | 1151.44  | 9.994985 |
| 10.05287 | 1150.774 | 9.92723  | 1151.221 | 10.0304  | 1151.216 | 9.996239 | 1151.438 | 9.996239 |
| 10.054   | 1150.765 | 9.93     | 1151.217 | 10.03163 | 1151.214 | 9.998433 | 1151.434 | 9.998433 |
| 10.05584 | 1150.751 | 9.93723  | 1151.205 | 10.03282 | 1151.211 | 9.99958  | 1151.432 | 9.99958  |
| 10.05729 | 1150.741 | 9.94     | 1151.201 | 10.03412 | 1151.208 | 10.00072 | 1151.43  | 10.00072 |
| 10.05867 | 1150.73  | 9.94723  | 1151.188 | 10.03533 | 1151.204 | 10.00191 | 1151.428 | 10.00191 |
| 10.06    | 1150.72  | 9.95     | 1151.184 | 10.03667 | 1151.199 | 10.00355 | 1151.426 | 10.00355 |
| 10.06105 | 1150.712 | 9.95723  | 1151.172 | 10.03801 | 1151.194 | 10.00566 | 1151.422 | 10.00566 |
| 10.06235 | 1150.702 | 9.96     | 1151.167 | 10.03936 | 1151.188 | 10.00683 | 1151.42  | 10.00683 |
| 10.06389 | 1150.69  | 9.96723  | 1151.156 | 10.0404  | 1151.183 | 10.008   | 1151.418 | 10.008   |
| 10.06518 | 1150.68  | 9.97     | 1151.151 | 10.04149 | 1151.177 | 10.00917 | 1151.416 | 10.00917 |
| 10.0664  | 1150.67  | 9.97723  | 1151.139 | 10.04279 | 1151.17  | 10.01017 | 1151.415 | 10.01017 |
| 10.06747 | 1150.661 | 9.98     | 1151.134 | 10.04419 | 1151.162 | 10.01157 | 1151.412 | 10.01157 |
| 10.06848 | 1150.653 | 9.98723  | 1151.122 | 10.04559 | 1151.154 | 10.01338 | 1151.409 | 10.01338 |
| 10.06949 | 1150.645 | 9.99     | 1151.118 | 10.04707 | 1151.144 | 10.01509 | 1151.407 | 10.01509 |
| 10.07071 | 1150.634 | 9.99723  | 1151.106 | 10.0481  | 1151.138 | 10.01823 | 1151.401 | 10.01823 |
| 10.07172 | 1150.626 | 9.998442 | 1151.104 | 10.04939 | 1151.129 | 10.02    | 1151.398 | 10.02    |
| 10.07293 | 1150.615 | 9.999606 | 1151.102 | 10.05041 | 1151.122 | 10.02109 | 1151.397 | 10.02109 |
| 10.07396 | 1150.606 | 10.00063 | 1151.1   | 10.05142 | 1151.115 | 10.02262 | 1151.394 | 10.02262 |
| 10.07535 | 1150.595 | 10.00182 | 1151.098 | 10.05287 | 1151.104 | 10.02387 | 1151.392 | 10.02387 |
| 10.07642 | 1150.585 | 10.00346 | 1151.095 | 10.054   | 1151.096 | 10.02499 | 1151.39  | 10.02499 |
| 10.07773 | 1150.574 | 10.00558 | 1151.092 | 10.05584 | 1151.082 | 10.02611 | 1151.388 | 10.02611 |

|          |          |          |          |          |          |          |          |          |
|----------|----------|----------|----------|----------|----------|----------|----------|----------|
| 10.07882 | 1150.565 | 10.00674 | 1151.09  | 10.05729 | 1151.071 | 10.02723 | 1151.387 | 10.02723 |
| 10.08    | 1150.554 | 10.0079  | 1151.088 | 10.05867 | 1151.061 | 10.02836 | 1151.385 | 10.02836 |
| 10.08106 | 1150.545 | 10.00906 | 1151.086 | 10.06    | 1151.05  | 10.02938 | 1151.383 | 10.02938 |
| 10.08229 | 1150.534 | 10.01009 | 1151.085 | 10.06105 | 1151.043 | 10.0304  | 1151.381 | 10.0304  |
| 10.08398 | 1150.519 | 10.01155 | 1151.082 | 10.06235 | 1151.033 | 10.03141 | 1151.379 | 10.03141 |
| 10.08506 | 1150.51  | 10.01336 | 1151.079 | 10.06389 | 1151.021 | 10.03251 | 1151.377 | 10.03251 |
| 10.08694 | 1150.494 | 10.01505 | 1151.076 | 10.06519 | 1151.011 | 10.03384 | 1151.374 | 10.03384 |
| 10.09    | 1150.468 | 10.01819 | 1151.071 | 10.0664  | 1151.001 | 10.03529 | 1151.369 | 10.03529 |
| 10.09108 | 1150.458 | 10.02    | 1151.068 | 10.06747 | 1150.992 | 10.03644 | 1151.366 | 10.03644 |
| 10.09279 | 1150.444 | 10.02109 | 1151.066 | 10.06849 | 1150.983 | 10.03759 | 1151.361 | 10.03759 |
| 10.09439 | 1150.43  | 10.02262 | 1151.064 | 10.0695  | 1150.975 | 10.03873 | 1151.356 | 10.03873 |
| 10.09579 | 1150.418 | 10.02387 | 1151.062 | 10.07071 | 1150.965 | 10.03988 | 1151.351 | 10.03988 |
| 10.09719 | 1150.405 | 10.02499 | 1151.06  | 10.07172 | 1150.956 | 10.04104 | 1151.345 | 10.04104 |
| 10.09859 | 1150.393 | 10.02611 | 1151.058 | 10.07293 | 1150.946 | 10.04219 | 1151.339 | 10.04219 |
| 10.1     | 1150.381 | 10.02723 | 1151.056 | 10.07397 | 1150.937 | 10.04326 | 1151.333 | 10.04326 |
| 10.10172 | 1150.366 | 10.02836 | 1151.054 | 10.07516 | 1150.927 | 10.04436 | 1151.327 | 10.04436 |
| 10.10316 | 1150.353 | 10.02938 | 1151.053 | 10.07647 | 1150.915 | 10.04579 | 1151.318 | 10.04579 |
| 10.10514 | 1150.335 | 10.0304  | 1151.051 | 10.07777 | 1150.904 | 10.04729 | 1151.308 | 10.04729 |
| 10.1064  | 1150.324 | 10.03141 | 1151.049 | 10.07892 | 1150.894 | 10.04833 | 1151.301 | 10.04833 |
| 10.10766 | 1150.313 | 10.03251 | 1151.047 | 10.08    | 1150.885 | 10.04963 | 1151.293 | 10.04963 |
| 10.10986 | 1150.294 | 10.03384 | 1151.043 | 10.08129 | 1150.873 | 10.05078 | 1151.285 | 10.05078 |
| 10.11109 | 1150.283 | 10.03529 | 1151.039 | 10.08264 | 1150.862 | 10.05233 | 1151.274 | 10.05233 |
| 10.11244 | 1150.271 | 10.03644 | 1151.035 | 10.08495 | 1150.842 | 10.05348 | 1151.265 | 10.05348 |
| 10.11381 | 1150.259 | 10.03759 | 1151.031 | 10.0866  | 1150.827 | 10.05505 | 1151.253 | 10.05505 |
| 10.11571 | 1150.243 | 10.03874 | 1151.026 | 10.08824 | 1150.813 | 10.05672 | 1151.241 | 10.05672 |
| 10.11691 | 1150.232 | 10.03988 | 1151.021 | 10.09    | 1150.798 | 10.05814 | 1151.23  | 10.05814 |
| 10.11812 | 1150.222 | 10.04104 | 1151.014 | 10.09101 | 1150.79  | 10.05957 | 1151.219 | 10.05957 |
| 10.12    | 1150.206 | 10.04219 | 1151.008 | 10.09266 | 1150.775 | 10.06084 | 1151.21  | 10.06084 |
| 10.1214  | 1150.193 | 10.04326 | 1151.002 | 10.09422 | 1150.762 | 10.06201 | 1151.201 | 10.06201 |
| 10.12256 | 1150.183 | 10.04436 | 1150.996 | 10.09559 | 1150.75  | 10.0633  | 1151.191 | 10.0633  |
| 10.12416 | 1150.169 | 10.04579 | 1150.988 | 10.09695 | 1150.738 | 10.06474 | 1151.18  | 10.06474 |
| 10.12518 | 1150.16  | 10.04729 | 1150.978 | 10.09832 | 1150.726 | 10.06609 | 1151.169 | 10.06609 |
| 10.1262  | 1150.152 | 10.04833 | 1150.971 | 10.1     | 1150.711 | 10.0673  | 1151.159 | 10.0673  |
| 10.12798 | 1150.136 | 10.04963 | 1150.962 | 10.1017  | 1150.696 | 10.06839 | 1151.15  | 10.06838 |
| 10.13    | 1150.118 | 10.05078 | 1150.955 | 10.10313 | 1150.684 | 10.06947 | 1151.141 | 10.06947 |
| 10.13122 | 1150.107 | 10.05233 | 1150.943 | 10.10509 | 1150.666 | 10.07057 | 1151.131 | 10.07057 |
| 10.1324  | 1150.097 | 10.05348 | 1150.935 | 10.10634 | 1150.655 | 10.0717  | 1151.122 | 10.0717  |
| 10.13344 | 1150.088 | 10.05505 | 1150.923 | 10.10759 | 1150.644 | 10.0727  | 1151.113 | 10.0727  |
| 10.13525 | 1150.072 | 10.05672 | 1150.91  | 10.10978 | 1150.625 | 10.07391 | 1151.103 | 10.07391 |
| 10.13632 | 1150.063 | 10.05814 | 1150.9   | 10.11108 | 1150.614 | 10.07511 | 1151.093 | 10.07511 |
| 10.13751 | 1150.052 | 10.05957 | 1150.889 | 10.11243 | 1150.602 | 10.07611 | 1151.084 | 10.07611 |
| 10.13999 | 1150.031 | 10.06084 | 1150.879 | 10.11381 | 1150.59  | 10.0772  | 1151.075 | 10.0772  |
| 10.14194 | 1150.013 | 10.06201 | 1150.87  | 10.1157  | 1150.574 | 10.07828 | 1151.065 | 10.07828 |
| 10.14363 | 1149.999 | 10.0633  | 1150.86  | 10.1169  | 1150.563 | 10.07947 | 1151.055 | 10.07947 |
| 10.14516 | 1149.985 | 10.06474 | 1150.849 | 10.11811 | 1150.553 | 10.08097 | 1151.042 | 10.08097 |
| 10.14669 | 1149.972 | 10.06609 | 1150.838 | 10.12    | 1150.536 | 10.0821  | 1151.032 | 10.0821  |
| 10.14821 | 1149.959 | 10.0673  | 1150.828 | 10.1214  | 1150.524 | 10.08323 | 1151.022 | 10.08323 |

|          |          |          |          |          |          |          |          |          |
|----------|----------|----------|----------|----------|----------|----------|----------|----------|
| 10.15    | 1149.943 | 10.06839 | 1150.819 | 10.12256 | 1150.514 | 10.08456 | 1151.011 | 10.08456 |
| 10.15174 | 1149.928 | 10.06947 | 1150.81  | 10.12416 | 1150.5   | 10.08589 | 1150.999 | 10.08589 |
| 10.15324 | 1149.915 | 10.07066 | 1150.8   | 10.12518 | 1150.491 | 10.08722 | 1150.988 | 10.08722 |
| 10.15474 | 1149.902 | 10.07168 | 1150.791 | 10.1262  | 1150.482 | 10.09    | 1150.964 | 10.09    |
| 10.15623 | 1149.889 | 10.07273 | 1150.783 | 10.12798 | 1150.467 | 10.09172 | 1150.949 | 10.09172 |
| 10.16    | 1149.855 | 10.07403 | 1150.771 | 10.13    | 1150.449 | 10.09318 | 1150.936 | 10.09318 |
| 10.16171 | 1149.84  | 10.07534 | 1150.76  | 10.13122 | 1150.438 | 10.09518 | 1150.919 | 10.09518 |
| 10.16332 | 1149.826 | 10.07645 | 1150.751 | 10.1324  | 1150.428 | 10.09645 | 1150.908 | 10.09645 |
| 10.16493 | 1149.812 | 10.07759 | 1150.741 | 10.13344 | 1150.419 | 10.09868 | 1150.889 | 10.09868 |
| 10.16654 | 1149.798 | 10.07872 | 1150.731 | 10.13525 | 1150.403 | 10.1     | 1150.877 | 10.1     |
| 10.17    | 1149.768 | 10.07985 | 1150.721 | 10.13632 | 1150.393 | 10.10115 | 1150.867 | 10.10115 |
| 10.17184 | 1149.752 | 10.08098 | 1150.711 | 10.13825 | 1150.377 | 10.10261 | 1150.854 | 10.10261 |
| 10.17358 | 1149.736 | 10.08219 | 1150.701 | 10.13936 | 1150.367 | 10.10414 | 1150.84  | 10.10414 |
| 10.17532 | 1149.721 | 10.08385 | 1150.686 | 10.14126 | 1150.35  | 10.10624 | 1150.822 | 10.10624 |
| 10.1773  | 1149.704 | 10.08491 | 1150.677 | 10.14261 | 1150.338 | 10.10758 | 1150.81  | 10.10758 |
| 10.17841 | 1149.693 | 10.08676 | 1150.661 | 10.14396 | 1150.327 | 10.10892 | 1150.798 | 10.10892 |
| 10.17953 | 1149.682 | 10.08862 | 1150.645 | 10.14531 | 1150.315 | 10.11    | 1150.789 | 10.11    |
| 10.18127 | 1149.664 | 10.09    | 1150.633 | 10.15    | 1150.274 | 10.11159 | 1150.775 | 10.11159 |
| 10.1823  | 1149.651 | 10.09107 | 1150.624 | 10.15154 | 1150.261 | 10.11291 | 1150.764 | 10.11291 |
| 10.18332 | 1149.636 | 10.09278 | 1150.61  | 10.15303 | 1150.248 | 10.11473 | 1150.748 | 10.11473 |
| 10.18434 | 1149.62  | 10.09438 | 1150.596 | 10.15451 | 1150.235 | 10.11588 | 1150.738 | 10.11588 |
| 10.18792 | 1149.553 | 10.09577 | 1150.584 | 10.15599 | 1150.222 | 10.11704 | 1150.728 | 10.11704 |
| 10.19    | 1149.508 | 10.09717 | 1150.571 | 10.16    | 1150.187 | 10.11907 | 1150.71  | 10.11907 |
| 10.19171 | 1149.468 | 10.09857 | 1150.559 | 10.1617  | 1150.172 | 10.12029 | 1150.699 | 10.12029 |
| 10.1938  | 1149.417 | 10.1     | 1150.546 | 10.16331 | 1150.158 | 10.12141 | 1150.69  | 10.12141 |
| 10.1948  | 1149.391 | 10.10172 | 1150.531 | 10.16492 | 1150.143 | 10.12277 | 1150.678 | 10.12277 |
| 10.1958  | 1149.365 | 10.10316 | 1150.519 | 10.16653 | 1150.129 | 10.12397 | 1150.667 | 10.12397 |
| 10.1968  | 1149.339 | 10.10514 | 1150.501 | 10.17    | 1150.099 | 10.12502 | 1150.658 | 10.12502 |
| 10.19856 | 1149.291 | 10.1064  | 1150.49  | 10.17184 | 1150.083 | 10.12607 | 1150.649 | 10.12607 |
| 10.2     | 1149.249 | 10.10766 | 1150.479 | 10.17358 | 1150.068 | 10.12712 | 1150.64  | 10.12712 |
| 10.20114 | 1149.215 | 10.10986 | 1150.46  | 10.17531 | 1150.052 | 10.12895 | 1150.624 | 10.12895 |
| 10.20303 | 1149.153 | 10.11109 | 1150.449 | 10.17705 | 1150.037 | 10.13    | 1150.615 | 10.13    |
| 10.20481 | 1149.092 | 10.11244 | 1150.437 | 10.18    | 1150.011 | 10.13124 | 1150.604 | 10.13124 |
| 10.20637 | 1149.036 | 10.11381 | 1150.425 | 10.18198 | 1149.994 | 10.13242 | 1150.593 | 10.13242 |
| 10.20793 | 1148.977 | 10.11571 | 1150.409 | 10.18385 | 1149.978 | 10.13346 | 1150.584 | 10.13346 |
| 10.2095  | 1148.917 | 10.11691 | 1150.398 | 10.18571 | 1149.961 | 10.13527 | 1150.568 | 10.13527 |
| 10.21054 | 1148.876 | 10.11811 | 1150.388 | 10.18757 | 1149.945 | 10.13632 | 1150.559 | 10.13632 |
| 10.21204 | 1148.814 | 10.12    | 1150.371 | 10.19    | 1149.924 | 10.13732 | 1150.55  | 10.13732 |
| 10.21376 | 1148.742 | 10.1214  | 1150.359 | 10.19213 | 1149.905 | 10.13928 | 1150.533 | 10.13928 |
| 10.21613 | 1148.639 | 10.12256 | 1150.349 | 10.19412 | 1149.888 | 10.14167 | 1150.512 | 10.14167 |
| 10.21764 | 1148.57  | 10.12416 | 1150.335 | 10.19611 | 1149.87  | 10.14304 | 1150.5   | 10.14304 |
| 10.22    | 1148.459 | 10.12518 | 1150.326 | 10.1981  | 1149.853 | 10.14441 | 1150.489 | 10.14441 |
| 10.22108 | 1148.406 | 10.1262  | 1150.317 | 10.2     | 1149.836 | 10.14579 | 1150.477 | 10.14579 |
| 10.223   | 1148.309 | 10.12798 | 1150.302 | 10.20227 | 1149.816 | 10.15    | 1150.44  | 10.15    |
| 10.22565 | 1148.169 | 10.13    | 1150.284 | 10.20439 | 1149.797 | 10.15157 | 1150.426 | 10.15157 |
| 10.22733 | 1148.078 | 10.13122 | 1150.273 | 10.20647 | 1149.779 | 10.15305 | 1150.413 | 10.15305 |
| 10.22901 | 1147.984 | 10.1324  | 1150.263 | 10.20882 | 1149.758 | 10.15454 | 1150.4   | 10.15454 |

|          |          |          |          |          |          |          |          |          |
|----------|----------|----------|----------|----------|----------|----------|----------|----------|
| 10.23024 | 1147.914 | 10.13343 | 1150.254 | 10.21    | 1149.746 | 10.15602 | 1150.387 | 10.15602 |
| 10.23219 | 1147.799 | 10.13525 | 1150.238 | 10.21192 | 1149.726 | 10.16    | 1150.352 | 10.16    |
| 10.23405 | 1147.688 | 10.13631 | 1150.229 | 10.2136  | 1149.703 | 10.1617  | 1150.337 | 10.1617  |
| 10.2366  | 1147.529 | 10.13786 | 1150.215 | 10.21484 | 1149.684 | 10.16331 | 1150.323 | 10.16331 |
| 10.23822 | 1147.426 | 10.14    | 1150.196 | 10.21609 | 1149.663 | 10.16492 | 1150.309 | 10.16492 |
| 10.24    | 1147.309 | 10.14219 | 1150.177 | 10.21733 | 1149.639 | 10.16653 | 1150.295 | 10.16653 |
| 10.24119 | 1147.229 | 10.14352 | 1150.166 | 10.22    | 1149.585 | 10.17    | 1150.265 | 10.17    |
| 10.24225 | 1147.157 | 10.14501 | 1150.153 | 10.22142 | 1149.553 | 10.17184 | 1150.249 | 10.17184 |
| 10.24331 | 1147.083 | 10.1465  | 1150.14  | 10.22266 | 1149.524 | 10.17358 | 1150.233 | 10.17358 |
| 10.24437 | 1147.009 | 10.14799 | 1150.127 | 10.2246  | 1149.477 | 10.17531 | 1150.218 | 10.17531 |
| 10.24623 | 1146.876 | 10.15    | 1150.109 | 10.22909 | 1149.359 | 10.17705 | 1150.203 | 10.17705 |
| 10.24809 | 1146.741 | 10.1517  | 1150.094 | 10.2305  | 1149.319 | 10.18    | 1150.177 | 10.18    |
| 10.24995 | 1146.603 | 10.1532  | 1150.081 | 10.23165 | 1149.284 | 10.18198 | 1150.16  | 10.18198 |
| 10.25131 | 1146.499 | 10.15469 | 1150.068 | 10.23312 | 1149.238 | 10.18385 | 1150.144 | 10.18385 |
| 10.25248 | 1146.409 | 10.15618 | 1150.055 | 10.2344  | 1149.196 | 10.18571 | 1150.127 | 10.18571 |
| 10.25365 | 1146.318 | 10.16    | 1150.021 | 10.23568 | 1149.153 | 10.18757 | 1150.111 | 10.18757 |
| 10.25481 | 1146.225 | 10.16171 | 1150.007 | 10.23792 | 1149.072 | 10.19    | 1150.09  | 10.19    |
| 10.25686 | 1146.061 | 10.16332 | 1149.992 | 10.24    | 1148.993 | 10.19213 | 1150.071 | 10.19213 |
| 10.2589  | 1145.893 | 10.16493 | 1149.978 | 10.24131 | 1148.941 | 10.19412 | 1150.053 | 10.19412 |
| 10.26    | 1145.801 | 10.16654 | 1149.964 | 10.24241 | 1148.897 | 10.19611 | 1150.036 | 10.19611 |
| 10.26143 | 1145.679 | 10.17    | 1149.934 | 10.24433 | 1148.816 | 10.1981  | 1150.019 | 10.19809 |
| 10.2627  | 1145.569 | 10.17184 | 1149.918 | 10.24699 | 1148.701 | 10.2     | 1150.002 | 10.2     |
| 10.26385 | 1145.469 | 10.17358 | 1149.902 | 10.24867 | 1148.626 | 10.20227 | 1149.982 | 10.20227 |
| 10.26499 | 1145.368 | 10.17531 | 1149.887 | 10.25    | 1148.564 | 10.20439 | 1149.963 | 10.20439 |
| 10.26613 | 1145.265 | 10.17705 | 1149.872 | 10.25115 | 1148.509 | 10.20651 | 1149.945 | 10.2065  |
| 10.26813 | 1145.084 | 10.18    | 1149.846 | 10.25216 | 1148.459 | 10.20862 | 1149.926 | 10.20862 |
| 10.27    | 1144.912 | 10.18198 | 1149.829 | 10.25397 | 1148.368 | 10.21    | 1149.914 | 10.21    |
| 10.27148 | 1144.773 | 10.18385 | 1149.812 | 10.25647 | 1148.237 | 10.21242 | 1149.893 | 10.21242 |
| 10.2728  | 1144.646 | 10.18571 | 1149.796 | 10.25806 | 1148.151 | 10.21466 | 1149.873 | 10.21466 |
| 10.27413 | 1144.518 | 10.18757 | 1149.78  | 10.26    | 1148.044 | 10.2169  | 1149.854 | 10.2169  |
| 10.27546 | 1144.388 | 10.19    | 1149.758 | 10.26114 | 1147.979 | 10.21915 | 1149.834 | 10.21914 |
| 10.27778 | 1144.158 | 10.19109 | 1149.749 | 10.26216 | 1147.92  | 10.22032 | 1149.824 | 10.22032 |
| 10.28    | 1143.934 | 10.19319 | 1149.73  | 10.26318 | 1147.86  | 10.22198 | 1149.809 | 10.22256 |
| 10.28165 | 1143.764 | 10.1951  | 1149.712 | 10.2642  | 1147.799 | 10.22388 | 1149.792 | 10.22493 |
| 10.28312 | 1143.61  | 10.19623 | 1149.699 | 10.26598 | 1147.691 | 10.22555 | 1149.776 | 10.2273  |
| 10.28459 | 1143.455 | 10.19735 | 1149.685 | 10.26776 | 1147.58  | 10.22695 | 1149.761 | 10.22967 |
| 10.28606 | 1143.297 | 10.19931 | 1149.658 | 10.26955 | 1147.466 | 10.22835 | 1149.744 | 10.23271 |
| 10.28864 | 1143.018 | 10.20068 | 1149.635 | 10.27061 | 1147.397 | 10.22975 | 1149.724 | 10.2352  |
| 10.29    | 1142.867 | 10.20259 | 1149.598 | 10.27235 | 1147.281 | 10.2316  | 1149.694 | 10.23756 |
| 10.2918  | 1142.665 | 10.20368 | 1149.575 | 10.27433 | 1147.145 | 10.233   | 1149.668 | 10.24    |
| 10.2934  | 1142.483 | 10.20478 | 1149.551 | 10.27706 | 1146.953 | 10.23412 | 1149.645 | 10.24146 |
| 10.29484 | 1142.318 | 10.20587 | 1149.526 | 10.2788  | 1146.828 | 10.23524 | 1149.621 | 10.24253 |
| 10.29628 | 1142.15  | 10.20779 | 1149.481 | 10.28    | 1146.74  | 10.23636 | 1149.596 | 10.2436  |
| 10.29772 | 1141.981 | 10.20971 | 1149.435 | 10.28128 | 1146.645 | 10.23994 | 1149.512 | 10.24549 |
| 10.3     | 1141.711 | 10.21121 | 1149.397 | 10.28242 | 1146.558 | 10.24094 | 1149.487 | 10.24685 |
| 10.30165 | 1141.513 | 10.21226 | 1149.369 | 10.28356 | 1146.47  | 10.24245 | 1149.448 | 10.24822 |
| 10.30298 | 1141.35  | 10.21415 | 1149.317 | 10.28471 | 1146.381 | 10.24377 | 1149.413 | 10.24958 |

|          |          |          |          |          |          |          |          |          |
|----------|----------|----------|----------|----------|----------|----------|----------|----------|
| 10.30432 | 1141.185 | 10.21674 | 1149.239 | 10.28671 | 1146.222 | 10.24576 | 1149.357 | 10.25156 |
| 10.30565 | 1141.018 | 10.21839 | 1149.186 | 10.28871 | 1146.061 | 10.24848 | 1149.273 | 10.25292 |
| 10.31    | 1140.468 | 10.22    | 1149.131 | 10.29    | 1145.955 | 10.25    | 1149.224 | 10.25394 |
| 10.31153 | 1140.271 | 10.22112 | 1149.091 | 10.29142 | 1145.836 | 10.25116 | 1149.184 | 10.25496 |
| 10.31295 | 1140.085 | 10.223   | 1149.022 | 10.29269 | 1145.729 | 10.25218 | 1149.148 | 10.25598 |
| 10.31436 | 1139.897 | 10.22477 | 1148.953 | 10.29395 | 1145.62  | 10.25402 | 1149.08  | 10.25953 |
| 10.31578 | 1139.708 | 10.22633 | 1148.892 | 10.29521 | 1145.509 | 10.25654 | 1148.983 | 10.26093 |
| 10.32    | 1139.136 | 10.22788 | 1148.828 | 10.29743 | 1145.314 | 10.25814 | 1148.919 | 10.26243 |
| 10.32162 | 1138.912 | 10.22943 | 1148.763 | 10.29964 | 1145.114 | 10.25975 | 1148.853 | 10.26448 |
| 10.32314 | 1138.7   | 10.23054 | 1148.716 | 10.30077 | 1145.011 | 10.26112 | 1148.795 | 10.26677 |
| 10.32465 | 1138.486 | 10.23205 | 1148.649 | 10.30293 | 1144.809 | 10.26299 | 1148.712 | 10.26905 |
| 10.32617 | 1138.27  | 10.23379 | 1148.569 | 10.30417 | 1144.691 | 10.26477 | 1148.63  | 10.27033 |
| 10.33    | 1137.716 | 10.23617 | 1148.454 | 10.30541 | 1144.571 | 10.26633 | 1148.557 | 10.27134 |
| 10.33173 | 1137.462 | 10.23769 | 1148.379 | 10.30665 | 1144.451 | 10.26789 | 1148.482 | 10.27246 |
| 10.33335 | 1137.221 | 10.24    | 1148.26  | 10.30881 | 1144.237 | 10.27    | 1148.375 | 10.27444 |
| 10.33497 | 1136.978 | 10.2411  | 1148.201 | 10.31    | 1144.119 | 10.27112 | 1148.317 | 10.27715 |
| 10.33658 | 1136.733 | 10.24307 | 1148.094 | 10.3116  | 1143.957 | 10.27212 | 1148.264 | 10.27888 |
| 10.34    | 1136.208 | 10.24578 | 1147.941 | 10.31304 | 1143.809 | 10.27313 | 1148.21  | 10.28    |
| 10.34185 | 1135.92  | 10.2475  | 1147.841 | 10.31448 | 1143.659 | 10.27413 | 1148.155 | 10.28117 |
| 10.34357 | 1135.649 | 10.24922 | 1147.738 | 10.31591 | 1143.508 | 10.27588 | 1148.057 | 10.2822  |
| 10.34528 | 1135.375 | 10.25025 | 1147.676 | 10.31843 | 1143.239 | 10.27763 | 1147.957 | 10.28405 |
| 10.347   | 1135.098 | 10.25226 | 1147.55  | 10.32    | 1143.069 | 10.27939 | 1147.855 | 10.28659 |
| 10.35    | 1134.611 | 10.25418 | 1147.426 | 10.32179 | 1142.872 | 10.2806  | 1147.782 | 10.28821 |
| 10.35196 | 1134.289 | 10.2568  | 1147.252 | 10.32338 | 1142.694 | 10.28229 | 1147.679 | 10.29    |
| 10.35379 | 1133.984 | 10.25848 | 1147.138 | 10.32496 | 1142.514 | 10.28423 | 1147.557 | 10.29116 |
| 10.35561 | 1133.677 | 10.26    | 1147.032 | 10.32655 | 1142.332 | 10.28689 | 1147.383 | 10.29219 |
| 10.35744 | 1133.367 | 10.26123 | 1146.945 | 10.32934 | 1142.009 | 10.28858 | 1147.27  | 10.29322 |
| 10.36    | 1132.927 | 10.26233 | 1146.866 | 10.3304  | 1141.884 | 10.29    | 1147.174 | 10.29426 |
| 10.36184 | 1132.609 | 10.26343 | 1146.785 | 10.33195 | 1141.699 | 10.29124 | 1147.088 | 10.29606 |
| 10.36364 | 1132.295 | 10.26453 | 1146.704 | 10.33367 | 1141.49  | 10.29235 | 1147.009 | 10.29787 |
| 10.36531 | 1132.009 | 10.26646 | 1146.559 | 10.33523 | 1141.3   | 10.29346 | 1146.93  | 10.29968 |
| 10.3666  | 1131.787 | 10.26839 | 1146.411 | 10.33678 | 1141.108 | 10.29457 | 1146.849 | 10.30126 |
| 10.36811 | 1131.527 | 10.27    | 1146.285 | 10.33833 | 1140.914 | 10.29651 | 1146.706 | 10.30237 |
| 10.36963 | 1131.269 | 10.27137 | 1146.176 | 10.34    | 1140.704 | 10.29846 | 1146.56  | 10.30337 |
| 10.37173 | 1130.911 | 10.27258 | 1146.077 | 10.34177 | 1140.478 | 10.3     | 1146.441 | 10.30437 |
| 10.37297 | 1130.701 | 10.2738  | 1145.977 | 10.34321 | 1140.292 | 10.30137 | 1146.334 | 10.30537 |
| 10.37421 | 1130.491 | 10.27501 | 1145.876 | 10.34464 | 1140.105 | 10.3026  | 1146.237 | 10.30712 |
| 10.37546 | 1130.282 | 10.27714 | 1145.696 | 10.34608 | 1139.916 | 10.30382 | 1146.138 | 10.30888 |
| 10.3798  | 1129.557 | 10.27926 | 1145.513 | 10.35    | 1139.391 | 10.30504 | 1146.038 | 10.31    |
| 10.38114 | 1129.334 | 10.2803  | 1145.421 | 10.35164 | 1139.169 | 10.30717 | 1145.861 | 10.31128 |
| 10.38297 | 1129.033 | 10.28149 | 1145.316 | 10.35316 | 1138.959 | 10.30931 | 1145.68  | 10.31243 |
| 10.38456 | 1128.771 | 10.28281 | 1145.196 | 10.35468 | 1138.747 | 10.31074 | 1145.556 | 10.31358 |
| 10.38575 | 1128.575 | 10.284   | 1145.088 | 10.3562  | 1138.534 | 10.31282 | 1145.372 | 10.31473 |
| 10.38695 | 1128.381 | 10.28519 | 1144.978 | 10.36    | 1137.992 | 10.31402 | 1145.265 | 10.31675 |
| 10.38814 | 1128.187 | 10.28638 | 1144.867 | 10.36174 | 1137.741 | 10.31521 | 1145.157 | 10.31876 |
| 10.39    | 1127.885 | 10.28847 | 1144.67  | 10.36336 | 1137.503 | 10.31641 | 1145.047 | 10.32    |
| 10.39136 | 1127.665 | 10.29    | 1144.523 | 10.36498 | 1137.263 | 10.3185  | 1144.853 | 10.32143 |

|          |          |          |          |          |          |          |          |          |
|----------|----------|----------|----------|----------|----------|----------|----------|----------|
| 10.39255 | 1127.473 | 10.29154 | 1144.372 | 10.3666  | 1137.02  | 10.32    | 1144.711 | 10.32269 |
| 10.39447 | 1127.166 | 10.29292 | 1144.235 | 10.37    | 1136.505 | 10.32154 | 1144.563 | 10.32396 |
| 10.39962 | 1126.349 | 10.2943  | 1144.096 | 10.37185 | 1136.221 | 10.32293 | 1144.428 | 10.32523 |
| 10.40105 | 1126.124 | 10.29568 | 1143.956 | 10.37357 | 1135.953 | 10.32431 | 1144.292 | 10.32745 |
| 10.40264 | 1125.875 | 10.2981  | 1143.707 | 10.3753  | 1135.682 | 10.32569 | 1144.153 | 10.32966 |
| 10.40482 | 1125.535 | 10.3     | 1143.508 | 10.37702 | 1135.409 | 10.32812 | 1143.908 | 10.33077 |
| 10.40621 | 1125.32  | 10.30172 | 1143.325 | 10.38    | 1134.931 | 10.33    | 1143.715 | 10.33293 |
| 10.40864 | 1124.945 | 10.30325 | 1143.16  | 10.38197 | 1134.612 | 10.33172 | 1143.534 | 10.33417 |
| 10.41    | 1124.736 | 10.30478 | 1142.992 | 10.3838  | 1134.311 | 10.33325 | 1143.371 | 10.33541 |
| 10.41138 | 1124.526 | 10.30631 | 1142.822 | 10.38563 | 1134.007 | 10.33478 | 1143.206 | 10.33665 |
| 10.41252 | 1124.351 | 10.30898 | 1142.521 | 10.38745 | 1133.701 | 10.33631 | 1143.039 | 10.33882 |
| 10.41449 | 1124.053 | 10.31    | 1142.405 | 10.39    | 1133.27  | 10.33899 | 1142.743 | 10.34    |
| 10.4172  | 1123.646 | 10.31188 | 1142.189 | 10.39209 | 1132.913 | 10.34    | 1142.63  | 10.3416  |
| 10.41892 | 1123.388 | 10.31354 | 1141.994 | 10.39403 | 1132.578 | 10.34188 | 1142.417 | 10.34304 |
| 10.42    | 1123.227 | 10.31503 | 1141.816 | 10.39596 | 1132.239 | 10.34354 | 1142.225 | 10.34447 |
| 10.42117 | 1123.052 | 10.31653 | 1141.636 | 10.3979  | 1131.896 | 10.34504 | 1142.05  | 10.34591 |
| 10.42221 | 1122.9   | 10.31803 | 1141.455 | 10.4     | 1131.522 | 10.34653 | 1141.873 | 10.34842 |
| 10.42406 | 1122.626 | 10.32    | 1141.213 | 10.40221 | 1131.125 | 10.34803 | 1141.695 | 10.35    |
| 10.42662 | 1122.252 | 10.32171 | 1141.002 | 10.40426 | 1130.752 | 10.35    | 1141.457 | 10.35178 |
| 10.42824 | 1122.016 | 10.3231  | 1140.827 | 10.40631 | 1130.376 | 10.35171 | 1141.249 | 10.35337 |
| 10.43    | 1121.761 | 10.32448 | 1140.651 | 10.40835 | 1129.996 | 10.3531  | 1141.078 | 10.35496 |
| 10.43117 | 1121.593 | 10.32587 | 1140.474 | 10.41    | 1129.688 | 10.35448 | 1140.904 | 10.35655 |
| 10.43221 | 1121.443 | 10.33    | 1139.935 | 10.41234 | 1129.248 | 10.35587 | 1140.73  | 10.35932 |
| 10.43325 | 1121.294 | 10.33158 | 1139.726 | 10.4145  | 1128.836 | 10.36    | 1140.2   | 10.3604  |
| 10.43429 | 1121.146 | 10.33305 | 1139.528 | 10.41666 | 1128.419 | 10.36158 | 1139.993 | 10.36194 |
| 10.43612 | 1120.886 | 10.33452 | 1139.328 | 10.41766 | 1128.225 | 10.36305 | 1139.799 | 10.36367 |
| 10.43794 | 1120.629 | 10.33599 | 1139.127 | 10.42    | 1127.773 | 10.36452 | 1139.602 | 10.36522 |
| 10.43977 | 1120.372 | 10.34    | 1138.569 | 10.42249 | 1127.295 | 10.36599 | 1139.404 | 10.36677 |
| 10.44127 | 1120.162 | 10.34168 | 1138.332 | 10.42405 | 1126.995 | 10.37    | 1138.855 | 10.36832 |
| 10.4424  | 1120.005 | 10.34325 | 1138.107 | 10.42543 | 1126.734 | 10.37168 | 1138.622 | 10.37    |
| 10.44342 | 1119.864 | 10.34481 | 1137.88  | 10.42783 | 1126.279 | 10.37325 | 1138.4   | 10.37177 |
| 10.44443 | 1119.724 | 10.34638 | 1137.651 | 10.42957 | 1125.95  | 10.37482 | 1138.177 | 10.3732  |
| 10.44545 | 1119.584 | 10.35    | 1137.116 | 10.43199 | 1125.494 | 10.37638 | 1137.951 | 10.37464 |
| 10.44722 | 1119.341 | 10.35179 | 1136.847 | 10.43373 | 1125.168 | 10.38    | 1137.424 | 10.37607 |
| 10.449   | 1119.099 | 10.35346 | 1136.592 | 10.43505 | 1124.923 | 10.38179 | 1137.159 | 10.38    |
| 10.45    | 1118.963 | 10.35513 | 1136.336 | 10.43636 | 1124.679 | 10.38346 | 1136.908 | 10.38164 |
| 10.4513  | 1118.786 | 10.3568  | 1136.076 | 10.43767 | 1124.436 | 10.38513 | 1136.655 | 10.38315 |
| 10.45247 | 1118.629 | 10.36    | 1135.574 | 10.44    | 1124.005 | 10.3868  | 1136.4   | 10.38467 |
| 10.45364 | 1118.473 | 10.36191 | 1135.271 | 10.4415  | 1123.729 | 10.39    | 1135.906 | 10.38619 |
| 10.45481 | 1118.317 | 10.36368 | 1134.985 | 10.44281 | 1123.488 | 10.39191 | 1135.607 | 10.39    |
| 10.45685 | 1118.045 | 10.36545 | 1134.696 | 10.44389 | 1123.293 | 10.39368 | 1135.325 | 10.39173 |
| 10.4589  | 1117.775 | 10.36723 | 1134.405 | 10.44496 | 1123.097 | 10.39546 | 1135.04  | 10.39335 |
| 10.46    | 1117.63  | 10.37    | 1133.945 | 10.44603 | 1122.903 | 10.39723 | 1134.753 | 10.39497 |
| 10.46145 | 1117.441 | 10.37203 | 1133.606 | 10.45    | 1122.184 | 10.4     | 1134.301 | 10.39659 |
| 10.46273 | 1117.274 | 10.37391 | 1133.286 | 10.45122 | 1121.964 | 10.40203 | 1133.966 | 10.4     |
| 10.46402 | 1117.108 | 10.37579 | 1132.963 | 10.45229 | 1121.772 | 10.40391 | 1133.65  | 10.40185 |
| 10.4653  | 1116.942 | 10.37767 | 1132.637 | 10.4542  | 1121.431 | 10.40579 | 1133.332 | 10.40357 |

|          |          |          |          |          |          |          |          |          |
|----------|----------|----------|----------|----------|----------|----------|----------|----------|
| 10.46755 | 1116.654 | 10.38    | 1132.229 | 10.45951 | 1120.491 | 10.40768 | 1133.01  | 10.40529 |
| 10.4698  | 1116.368 | 10.38215 | 1131.85  | 10.46062 | 1120.295 | 10.41    | 1132.61  | 10.40701 |
| 10.47157 | 1116.144 | 10.38414 | 1131.494 | 10.4619  | 1120.071 | 10.41215 | 1132.236 | 10.41    |
| 10.47297 | 1115.97  | 10.38612 | 1131.134 | 10.46353 | 1119.787 | 10.41414 | 1131.884 | 10.41197 |
| 10.47422 | 1115.813 | 10.38811 | 1130.772 | 10.46495 | 1119.539 | 10.41613 | 1131.53  | 10.41379 |
| 10.47547 | 1115.658 | 10.38948 | 1130.522 | 10.46638 | 1119.292 | 10.41813 | 1131.171 | 10.41562 |
| 10.47673 | 1115.503 | 10.39159 | 1130.135 | 10.46887 | 1118.862 | 10.42    | 1130.832 | 10.41745 |
| 10.47892 | 1115.233 | 10.39295 | 1129.887 | 10.47    | 1118.668 | 10.42228 | 1130.417 | 10.42    |
| 10.48    | 1115.101 | 10.39557 | 1129.411 | 10.47141 | 1118.426 | 10.42438 | 1130.027 | 10.42209 |
| 10.48161 | 1114.905 | 10.39759 | 1129.048 | 10.47259 | 1118.225 | 10.42648 | 1129.634 | 10.42402 |
| 10.48306 | 1114.73  | 10.3996  | 1128.687 | 10.4736  | 1118.053 | 10.42859 | 1129.237 | 10.42596 |
| 10.48451 | 1114.556 | 10.4021  | 1128.241 | 10.47462 | 1117.881 | 10.43    | 1128.968 | 10.4279  |
| 10.48595 | 1114.383 | 10.40344 | 1128.003 | 10.47563 | 1117.709 | 10.4324  | 1128.509 | 10.43    |
| 10.48849 | 1114.083 | 10.40477 | 1127.767 | 10.4774  | 1117.41  | 10.43462 | 1128.079 | 10.43221 |
| 10.49    | 1113.904 | 10.40611 | 1127.531 | 10.47918 | 1117.112 | 10.43684 | 1127.645 | 10.43426 |
| 10.49179 | 1113.695 | 10.41    | 1126.846 | 10.48025 | 1116.932 | 10.43905 | 1127.206 | 10.43631 |
| 10.49338 | 1113.51  | 10.41153 | 1126.58  | 10.48228 | 1116.594 | 10.44032 | 1126.956 | 10.43835 |
| 10.49497 | 1113.327 | 10.41286 | 1126.347 | 10.4842  | 1116.276 | 10.44253 | 1126.513 | 10.44    |
| 10.49656 | 1113.145 | 10.41395 | 1126.159 | 10.48684 | 1115.84  | 10.44603 | 1125.801 | 10.44234 |
| 10.49935 | 1112.828 | 10.41503 | 1125.972 | 10.48852 | 1115.564 | 10.44929 | 1125.141 | 10.4445  |
| 10.5004  | 1112.709 | 10.41612 | 1125.784 | 10.49    | 1115.323 | 10.45036 | 1124.924 | 10.44666 |
| 10.50194 | 1112.536 | 10.42    | 1125.119 | 10.49121 | 1115.126 | 10.45286 | 1124.419 | 10.44882 |
| 10.50366 | 1112.345 | 10.42124 | 1124.907 | 10.49229 | 1114.951 | 10.45537 | 1123.918 | 10.45    |
| 10.5052  | 1112.174 | 10.42233 | 1124.723 | 10.49338 | 1114.776 | 10.45715 | 1123.563 | 10.45247 |
| 10.50675 | 1112.004 | 10.42424 | 1124.399 | 10.49446 | 1114.602 | 10.45894 | 1123.208 | 10.45474 |
| 10.5083  | 1111.835 | 10.42947 | 1123.522 | 10.49635 | 1114.297 | 10.46    | 1122.999 | 10.45702 |
| 10.51    | 1111.65  | 10.43061 | 1123.332 | 10.49825 | 1113.995 | 10.46204 | 1122.595 | 10.45929 |
| 10.51177 | 1111.459 | 10.43187 | 1123.123 | 10.5     | 1113.716 | 10.46382 | 1122.245 | 10.46033 |
| 10.51335 | 1111.29  | 10.43348 | 1122.857 | 10.50133 | 1113.506 | 10.4651  | 1121.995 | 10.4626  |
| 10.51452 | 1111.165 | 10.43489 | 1122.626 | 10.5025  | 1113.321 | 10.46638 | 1121.746 | 10.46499 |
| 10.51634 | 1110.974 | 10.4363  | 1122.395 | 10.50356 | 1113.155 | 10.46766 | 1121.497 | 10.46739 |
| 10.51778 | 1110.823 | 10.43876 | 1121.993 | 10.50461 | 1112.99  | 10.47    | 1121.042 | 10.46978 |
| 10.51922 | 1110.673 | 10.44    | 1121.791 | 10.50567 | 1112.825 | 10.47146 | 1120.759 | 10.47274 |
| 10.52053 | 1110.537 | 10.4414  | 1121.566 | 10.50752 | 1112.537 | 10.47274 | 1120.513 | 10.47462 |
| 10.52209 | 1110.377 | 10.44256 | 1121.379 | 10.50937 | 1112.25  | 10.4738  | 1120.309 | 10.47637 |
| 10.52407 | 1110.174 | 10.44356 | 1121.218 | 10.51066 | 1112.051 | 10.47486 | 1120.105 | 10.47888 |
| 10.52581 | 1109.998 | 10.44456 | 1121.058 | 10.51258 | 1111.757 | 10.47592 | 1119.902 | 10.48    |
| 10.52755 | 1109.823 | 10.44556 | 1120.898 | 10.51379 | 1111.571 | 10.48    | 1119.126 | 10.48287 |
| 10.52928 | 1109.65  | 10.44731 | 1120.619 | 10.51501 | 1111.386 | 10.48121 | 1118.896 | 10.4844  |
| 10.53053 | 1109.526 | 10.44906 | 1120.341 | 10.51714 | 1111.063 | 10.48228 | 1118.696 | 10.48593 |
| 10.53191 | 1109.391 | 10.45025 | 1120.153 | 10.51927 | 1110.742 | 10.48419 | 1118.336 | 10.48747 |
| 10.53346 | 1109.24  | 10.45225 | 1119.84  | 10.5203  | 1110.587 | 10.48957 | 1117.332 | 10.49    |
| 10.53559 | 1109.034 | 10.45414 | 1119.544 | 10.52151 | 1110.408 | 10.49063 | 1117.136 | 10.49175 |
| 10.53695 | 1108.903 | 10.45674 | 1119.14  | 10.52285 | 1110.209 | 10.49193 | 1116.897 | 10.49328 |
| 10.5383  | 1108.774 | 10.4584  | 1118.884 | 10.52419 | 1110.01  | 10.49358 | 1116.593 | 10.49455 |
| 10.54    | 1108.613 | 10.46    | 1118.638 | 10.52553 | 1109.813 | 10.49502 | 1116.328 | 10.49582 |
| 10.54162 | 1108.461 | 10.46119 | 1118.455 | 10.52787 | 1109.468 | 10.49646 | 1116.064 | 10.49708 |



|          |          |          |          |          |          |          |          |          |
|----------|----------|----------|----------|----------|----------|----------|----------|----------|
| 10.54297 | 1108.336 | 10.46226 | 1118.293 | 10.53    | 1109.158 | 10.49899 | 1115.605 | 10.5     |
| 10.54483 | 1108.164 | 10.46332 | 1118.131 | 10.53164 | 1108.92  | 10.5     | 1115.421 | 10.50145 |
| 10.54602 | 1108.055 | 10.46439 | 1117.969 | 10.53309 | 1108.711 | 10.50143 | 1115.163 | 10.50271 |
| 10.5472  | 1107.948 | 10.46625 | 1117.688 | 10.53439 | 1108.524 | 10.50263 | 1114.948 | 10.50377 |
| 10.54927 | 1107.76  | 10.46812 | 1117.408 | 10.5357  | 1108.337 | 10.50365 | 1114.763 | 10.50483 |
| 10.5503  | 1107.669 | 10.46998 | 1117.129 | 10.537   | 1108.151 | 10.50468 | 1114.579 | 10.50589 |
| 10.55157 | 1107.556 | 10.4713  | 1116.932 | 10.53929 | 1107.827 | 10.50571 | 1114.396 | 10.51    |
| 10.55314 | 1107.417 | 10.47246 | 1116.761 | 10.54033 | 1107.681 | 10.50751 | 1114.076 | 10.51121 |
| 10.55455 | 1107.294 | 10.4735  | 1116.608 | 10.54168 | 1107.491 | 10.5093  | 1113.756 | 10.51227 |
| 10.55578 | 1107.187 | 10.47454 | 1116.455 | 10.54318 | 1107.281 | 10.51061 | 1113.525 | 10.51417 |
| 10.55701 | 1107.081 | 10.47557 | 1116.303 | 10.54469 | 1107.072 | 10.51231 | 1113.225 | 10.51963 |
| 10.55824 | 1106.976 | 10.47739 | 1116.037 | 10.54619 | 1106.864 | 10.51427 | 1112.884 | 10.52064 |
| 10.56    | 1106.826 | 10.47921 | 1115.773 | 10.54882 | 1106.502 | 10.51695 | 1112.416 | 10.52196 |
| 10.56161 | 1106.691 | 10.48026 | 1115.621 | 10.55    | 1106.341 | 10.51866 | 1112.12  | 10.52363 |
| 10.56296 | 1106.578 | 10.48133 | 1115.466 | 10.55186 | 1106.088 | 10.52    | 1111.887 | 10.52509 |
| 10.56483 | 1106.424 | 10.48253 | 1115.294 | 10.55351 | 1105.865 | 10.52123 | 1111.675 | 10.52655 |
| 10.56601 | 1106.327 | 10.48373 | 1115.123 | 10.55516 | 1105.643 | 10.52233 | 1111.486 | 10.52911 |
| 10.56809 | 1106.158 | 10.48492 | 1114.952 | 10.55682 | 1105.422 | 10.52343 | 1111.298 | 10.53037 |
| 10.57    | 1106.005 | 10.48702 | 1114.655 | 10.55918 | 1105.108 | 10.52453 | 1111.11  | 10.53145 |
| 10.57116 | 1105.913 | 10.48911 | 1114.36  | 10.56039 | 1104.949 | 10.52646 | 1110.783 | 10.53266 |
| 10.57266 | 1105.795 | 10.4903  | 1114.193 | 10.56151 | 1104.802 | 10.52839 | 1110.457 | 10.5337  |
| 10.5743  | 1105.668 | 10.49148 | 1114.028 | 10.56263 | 1104.655 | 10.53    | 1110.185 | 10.53474 |
| 10.57656 | 1105.495 | 10.4928  | 1113.845 | 10.56533 | 1104.304 | 10.53135 | 1109.958 | 10.53578 |
| 10.57799 | 1105.386 | 10.49411 | 1113.663 | 10.56661 | 1104.138 | 10.53254 | 1109.759 | 10.5376  |
| 10.57942 | 1105.278 | 10.49543 | 1113.481 | 10.5679  | 1103.972 | 10.53362 | 1109.58  | 10.53942 |
| 10.5805  | 1105.197 | 10.49773 | 1113.165 | 10.56906 | 1103.824 | 10.53469 | 1109.401 | 10.54062 |
| 10.58191 | 1105.093 | 10.5     | 1112.857 | 10.57017 | 1103.683 | 10.53577 | 1109.223 | 10.54235 |
| 10.58353 | 1104.975 | 10.50161 | 1112.639 | 10.57132 | 1103.536 | 10.53765 | 1108.912 | 10.54432 |
| 10.58576 | 1104.814 | 10.50304 | 1112.447 | 10.57248 | 1103.389 | 10.53953 | 1108.602 | 10.54705 |
| 10.58717 | 1104.713 | 10.50432 | 1112.275 | 10.57422 | 1103.17  | 10.54067 | 1108.415 | 10.54878 |
| 10.58965 | 1104.538 | 10.5056  | 1112.104 | 10.57803 | 1102.696 | 10.54262 | 1108.098 | 10.55    |
| 10.59073 | 1104.463 | 10.50689 | 1111.934 | 10.58    | 1102.452 | 10.54386 | 1107.897 | 10.55125 |
| 10.59207 | 1104.372 | 10.50913 | 1111.637 | 10.58135 | 1102.286 | 10.5451  | 1107.697 | 10.55237 |
| 10.59323 | 1104.293 | 10.51032 | 1111.481 | 10.58255 | 1102.141 | 10.54726 | 1107.347 | 10.55348 |
| 10.59424 | 1104.225 | 10.51165 | 1111.307 | 10.58359 | 1102.015 | 10.54943 | 1107     | 10.5546  |
| 10.59525 | 1104.157 | 10.51313 | 1111.115 | 10.58541 | 1101.794 | 10.55075 | 1106.789 | 10.55655 |
| 10.59625 | 1104.09  | 10.51461 | 1110.924 | 10.58705 | 1101.597 | 10.55289 | 1106.45  | 10.55851 |
| 10.59802 | 1103.974 | 10.51609 | 1110.734 | 10.58992 | 1101.255 | 10.55426 | 1106.235 | 10.56    |
| 10.59978 | 1103.86  | 10.51868 | 1110.402 | 10.5913  | 1101.093 | 10.55562 | 1106.021 | 10.56137 |
| 10.60124 | 1103.766 | 10.52    | 1110.234 | 10.59243 | 1100.96  | 10.558   | 1105.648 | 10.56258 |
| 10.60235 | 1103.696 | 10.52183 | 1110.003 | 10.59441 | 1100.729 | 10.56    | 1105.337 | 10.56367 |
| 10.60433 | 1103.572 | 10.52346 | 1109.8   | 10.59614 | 1100.528 | 10.56166 | 1105.08  | 10.56476 |
| 10.60706 | 1103.405 | 10.52508 | 1109.597 | 10.59788 | 1100.329 | 10.56314 | 1104.853 | 10.56585 |
| 10.6088  | 1103.3   | 10.52671 | 1109.396 | 10.6     | 1100.086 | 10.56446 | 1104.65  | 10.56776 |
| 10.61    | 1103.228 | 10.52955 | 1109.046 | 10.601   | 1099.973 | 10.56579 | 1104.447 | 10.56967 |
| 10.6113  | 1103.152 | 10.53098 | 1108.872 | 10.60257 | 1099.795 | 10.56712 | 1104.245 | 10.57068 |
| 10.61246 | 1103.084 | 10.53198 | 1108.75  | 10.60404 | 1099.631 | 10.56944 | 1103.894 | 10.57266 |

|          |          |          |          |          |          |          |          |          |
|----------|----------|----------|----------|----------|----------|----------|----------|----------|
| 10.61363 | 1103.018 | 10.53374 | 1108.539 | 10.60532 | 1099.489 | 10.57083 | 1103.684 | 10.57392 |
| 10.6148  | 1102.951 | 10.53531 | 1108.35  | 10.6066  | 1099.346 | 10.57323 | 1103.325 | 10.57517 |
| 10.61684 | 1102.837 | 10.53704 | 1108.144 | 10.60789 | 1099.205 | 10.57476 | 1103.098 | 10.57737 |
| 10.61889 | 1102.724 | 10.53847 | 1107.974 | 10.61    | 1098.974 | 10.57629 | 1102.872 | 10.57957 |
| 10.62    | 1102.664 | 10.53991 | 1107.805 | 10.61168 | 1098.792 | 10.57896 | 1102.478 | 10.58077 |
| 10.62147 | 1102.586 | 10.54164 | 1107.602 | 10.6131  | 1098.639 | 10.58    | 1102.325 | 10.58294 |
| 10.62278 | 1102.517 | 10.54307 | 1107.435 | 10.61505 | 1098.43  | 10.58189 | 1102.05  | 10.58432 |
| 10.62409 | 1102.449 | 10.54416 | 1107.309 | 10.61629 | 1098.298 | 10.58334 | 1101.84  | 10.5857  |
| 10.6254  | 1102.382 | 10.54525 | 1107.183 | 10.61846 | 1098.069 | 10.58499 | 1101.601 | 10.58812 |
| 10.62769 | 1102.267 | 10.54634 | 1107.058 | 10.62    | 1097.908 | 10.5862  | 1101.427 | 10.59    |
| 10.62999 | 1102.154 | 10.54918 | 1106.735 | 10.62121 | 1097.783 | 10.58741 | 1101.255 | 10.59169 |
| 10.63162 | 1102.076 | 10.5504  | 1106.596 | 10.62279 | 1097.62  | 10.58862 | 1101.082 | 10.59318 |
| 10.63306 | 1102.008 | 10.552   | 1106.417 | 10.6245  | 1097.445 | 10.59    | 1100.886 | 10.59453 |
| 10.63451 | 1101.942 | 10.55308 | 1106.296 | 10.62686 | 1097.206 | 10.59138 | 1100.69  | 10.59587 |
| 10.63595 | 1101.876 | 10.55474 | 1106.112 | 10.62836 | 1097.055 | 10.59259 | 1100.52  | 10.59722 |
| 10.63847 | 1101.764 | 10.55702 | 1105.861 | 10.62986 | 1096.906 | 10.59363 | 1100.374 | 10.59957 |
| 10.64    | 1101.698 | 10.55847 | 1105.702 | 10.63106 | 1096.787 | 10.59467 | 1100.229 | 10.60084 |
| 10.64177 | 1101.623 | 10.55992 | 1105.544 | 10.63284 | 1096.612 | 10.59571 | 1100.084 | 10.60328 |
| 10.64334 | 1101.558 | 10.56171 | 1105.351 | 10.63453 | 1096.447 | 10.59866 | 1099.675 | 10.60482 |
| 10.64476 | 1101.501 | 10.56314 | 1105.198 | 10.63601 | 1096.304 | 10.6     | 1099.49  | 10.60637 |
| 10.64617 | 1101.445 | 10.5651  | 1104.99  | 10.63749 | 1096.162 | 10.60142 | 1099.296 | 10.60782 |
| 10.64758 | 1101.39  | 10.56634 | 1104.858 | 10.64    | 1095.924 | 10.60315 | 1099.059 | 10.60947 |
| 10.65    | 1101.298 | 10.56759 | 1104.727 | 10.64111 | 1095.82  | 10.60483 | 1098.833 | 10.61165 |
| 10.65162 | 1101.238 | 10.56977 | 1104.499 | 10.6431  | 1095.634 | 10.60713 | 1098.523 | 10.6131  |
| 10.65293 | 1101.191 | 10.57111 | 1104.361 | 10.64584 | 1095.382 | 10.60859 | 1098.327 | 10.61439 |
| 10.65425 | 1101.145 | 10.57251 | 1104.217 | 10.64759 | 1095.223 | 10.61    | 1098.14  | 10.61567 |
| 10.65556 | 1101.1   | 10.57392 | 1104.073 | 10.65    | 1095.005 | 10.61175 | 1097.908 | 10.61696 |
| 10.66    | 1100.954 | 10.57587 | 1103.875 | 10.65126 | 1094.893 | 10.61321 | 1097.716 | 10.61995 |
| 10.6615  | 1100.907 | 10.57711 | 1103.751 | 10.65238 | 1094.794 | 10.61521 | 1097.453 | 10.62151 |
| 10.6629  | 1100.865 | 10.57835 | 1103.627 | 10.65351 | 1094.695 | 10.61649 | 1097.287 | 10.62341 |
| 10.6643  | 1100.824 | 10.58    | 1103.463 | 10.65463 | 1094.597 | 10.61777 | 1097.122 | 10.62529 |
| 10.6657  | 1100.784 | 10.5816  | 1103.305 | 10.6566  | 1094.427 | 10.62    | 1096.834 | 10.62787 |
| 10.67    | 1100.668 | 10.58295 | 1103.173 | 10.65857 | 1094.258 | 10.62163 | 1096.626 | 10.62952 |
| 10.6716  | 1100.627 | 10.58481 | 1102.993 | 10.66    | 1094.137 | 10.62299 | 1096.453 | 10.63052 |
| 10.67309 | 1100.591 | 10.58599 | 1102.879 | 10.6614  | 1094.019 | 10.62487 | 1096.215 | 10.63191 |
| 10.67459 | 1100.556 | 10.58806 | 1102.681 | 10.66265 | 1093.916 | 10.62607 | 1096.064 | 10.6335  |
| 10.67609 | 1100.523 | 10.59    | 1102.498 | 10.66389 | 1093.813 | 10.62817 | 1095.802 | 10.63568 |
| 10.68    | 1100.44  | 10.59114 | 1102.391 | 10.66514 | 1093.711 | 10.63    | 1095.575 | 10.63707 |
| 10.68171 | 1100.407 | 10.59263 | 1102.253 | 10.66732 | 1093.534 | 10.63113 | 1095.435 | 10.63846 |
| 10.6833  | 1100.378 | 10.59423 | 1102.105 | 10.6695  | 1093.359 | 10.63258 | 1095.257 | 10.64    |
| 10.6849  | 1100.351 | 10.59643 | 1101.904 | 10.67076 | 1093.26  | 10.63413 | 1095.069 | 10.64171 |
| 10.6865  | 1100.326 | 10.59784 | 1101.777 | 10.67291 | 1093.092 | 10.63625 | 1094.812 | 10.64314 |
| 10.69    | 1100.274 | 10.59924 | 1101.651 | 10.67414 | 1092.997 | 10.63759 | 1094.65  | 10.64511 |
| 10.69182 | 1100.249 | 10.60049 | 1101.539 | 10.67537 | 1092.903 | 10.63894 | 1094.488 | 10.64636 |
| 10.69352 | 1100.229 | 10.60187 | 1101.417 | 10.6766  | 1092.809 | 10.64    | 1094.362 | 10.64761 |
| 10.69521 | 1100.211 | 10.60344 | 1101.279 | 10.67875 | 1092.647 | 10.64178 | 1094.152 | 10.6498  |
| 10.69691 | 1100.195 | 10.60561 | 1101.09  | 10.68    | 1092.554 | 10.64328 | 1093.975 | 10.65115 |

|          |          |          |          |          |          |          |          |          |
|----------|----------|----------|----------|----------|----------|----------|----------|----------|
| 10.7     | 1100.169 | 10.607   | 1100.971 | 10.6816  | 1092.437 | 10.64534 | 1093.734 | 10.65262 |
| 10.70194 | 1100.155 | 10.60941 | 1100.765 | 10.68303 | 1092.332 | 10.64666 | 1093.581 | 10.65415 |
| 10.70374 | 1100.145 | 10.61072 | 1100.656 | 10.68447 | 1092.229 | 10.64895 | 1093.316 | 10.65626 |
| 10.70553 | 1100.138 | 10.61201 | 1100.547 | 10.68591 | 1092.127 | 10.65    | 1093.196 | 10.6576  |
| 10.70733 | 1100.132 | 10.61315 | 1100.454 | 10.68842 | 1091.951 | 10.65129 | 1093.05  | 10.65893 |
| 10.71    | 1100.127 | 10.6151  | 1100.293 | 10.69    | 1091.841 | 10.65296 | 1092.86  | 10.66    |
| 10.71205 | 1100.126 | 10.6178  | 1100.075 | 10.69179 | 1091.719 | 10.6548  | 1092.655 | 10.66175 |
| 10.71414 | 1100.128 | 10.61951 | 1099.939 | 10.69339 | 1091.612 | 10.65731 | 1092.374 | 10.66322 |
| 10.71531 | 1100.131 | 10.62059 | 1099.852 | 10.69498 | 1091.506 | 10.65892 | 1092.197 | 10.66525 |
| 10.71677 | 1100.135 | 10.62228 | 1099.721 | 10.69658 | 1091.402 | 10.66    | 1092.079 | 10.66654 |
| 10.71816 | 1100.14  | 10.62421 | 1099.571 | 10.69937 | 1091.222 | 10.66113 | 1091.955 | 10.6688  |
| 10.72    | 1100.149 | 10.62686 | 1099.369 | 10.7004  | 1091.157 | 10.66213 | 1091.847 | 10.67    |
| 10.7211  | 1100.155 | 10.62855 | 1099.242 | 10.70196 | 1091.059 | 10.66394 | 1091.652 | 10.67126 |
| 10.72304 | 1100.169 | 10.63    | 1099.133 | 10.7037  | 1090.952 | 10.66642 | 1091.387 | 10.67289 |
| 10.72498 | 1100.186 | 10.63126 | 1099.04  | 10.70526 | 1090.857 | 10.66799 | 1091.22  | 10.67466 |
| 10.72722 | 1100.208 | 10.6324  | 1098.958 | 10.70683 | 1090.764 | 10.67    | 1091.009 | 10.6771  |
| 10.72945 | 1100.234 | 10.63353 | 1098.875 | 10.70839 | 1090.672 | 10.67118 | 1090.886 | 10.67865 |
| 10.73256 | 1100.273 | 10.63467 | 1098.794 | 10.71    | 1090.578 | 10.67224 | 1090.776 | 10.68    |
| 10.73468 | 1100.305 | 10.63666 | 1098.653 | 10.71179 | 1090.475 | 10.6733  | 1090.667 | 10.68109 |
| 10.73681 | 1100.34  | 10.63864 | 1098.513 | 10.71323 | 1090.393 | 10.67436 | 1090.558 | 10.68293 |
| 10.73894 | 1100.379 | 10.64    | 1098.419 | 10.71468 | 1090.313 | 10.67622 | 1090.368 | 10.68467 |
| 10.74    | 1100.398 | 10.64143 | 1098.321 | 10.71613 | 1090.234 | 10.67808 | 1090.18  | 10.6862  |
| 10.74243 | 1100.446 | 10.64271 | 1098.235 | 10.72    | 1090.027 | 10.68    | 1089.988 | 10.68772 |
| 10.74465 | 1100.495 | 10.64398 | 1098.149 | 10.72165 | 1089.941 | 10.68134 | 1089.855 | 10.69    |
| 10.74687 | 1100.547 | 10.64526 | 1098.065 | 10.72319 | 1089.863 | 10.68253 | 1089.738 | 10.69114 |
| 10.7491  | 1100.603 | 10.64749 | 1097.918 | 10.72472 | 1089.787 | 10.68373 | 1089.621 | 10.69216 |
| 10.75032 | 1100.635 | 10.64972 | 1097.774 | 10.72625 | 1089.712 | 10.68492 | 1089.504 | 10.69319 |
| 10.75254 | 1100.694 | 10.65078 | 1097.707 | 10.73    | 1089.533 | 10.68701 | 1089.302 | 10.69421 |
| 10.75487 | 1100.763 | 10.65299 | 1097.569 | 10.73175 | 1089.452 | 10.6891  | 1089.102 | 10.696   |
| 10.7572  | 1100.835 | 10.65439 | 1097.483 | 10.73338 | 1089.379 | 10.6903  | 1088.989 | 10.6978  |
| 10.75953 | 1100.912 | 10.6558  | 1097.398 | 10.73501 | 1089.307 | 10.69148 | 1088.877 | 10.7     |
| 10.76266 | 1101.018 | 10.65826 | 1097.25  | 10.73664 | 1089.237 | 10.6928  | 1088.754 | 10.70129 |
| 10.7651  | 1101.109 | 10.66    | 1097.148 | 10.74    | 1089.097 | 10.69412 | 1088.632 | 10.70244 |
| 10.76754 | 1101.203 | 10.66173 | 1097.048 | 10.74186 | 1089.021 | 10.69544 | 1088.51  | 10.70359 |
| 10.76998 | 1101.303 | 10.66326 | 1096.961 | 10.7436  | 1088.954 | 10.69775 | 1088.299 | 10.70475 |
| 10.77279 | 1101.42  | 10.66464 | 1096.884 | 10.74533 | 1088.888 | 10.7     | 1088.096 | 10.70676 |
| 10.77534 | 1101.534 | 10.66602 | 1096.808 | 10.74706 | 1088.824 | 10.70163 | 1087.951 | 10.70878 |
| 10.77789 | 1101.654 | 10.6674  | 1096.733 | 10.75    | 1088.719 | 10.70307 | 1087.824 | 10.71    |
| 10.78    | 1101.756 | 10.66981 | 1096.603 | 10.75198 | 1088.651 | 10.70437 | 1087.711 | 10.71143 |
| 10.78291 | 1101.9   | 10.67087 | 1096.548 | 10.75382 | 1088.591 | 10.70567 | 1087.598 | 10.7127  |
| 10.78558 | 1102.041 | 10.67338 | 1096.418 | 10.75565 | 1088.532 | 10.70697 | 1087.486 | 10.71398 |
| 10.78824 | 1102.188 | 10.67499 | 1096.338 | 10.75749 | 1088.476 | 10.70924 | 1087.292 | 10.71525 |
| 10.79    | 1102.288 | 10.67659 | 1096.259 | 10.76    | 1088.402 | 10.71032 | 1087.2   | 10.71748 |
| 10.79304 | 1102.464 | 10.67939 | 1096.123 | 10.7621  | 1088.342 | 10.71168 | 1087.086 | 10.71971 |
| 10.79581 | 1102.634 | 10.6804  | 1096.075 | 10.76404 | 1088.291 | 10.71319 | 1086.961 | 10.72077 |
| 10.79859 | 1102.811 | 10.68199 | 1096.001 | 10.76598 | 1088.242 | 10.71471 | 1086.836 | 10.72296 |
| 10.8     | 1102.903 | 10.68376 | 1095.921 | 10.76792 | 1088.195 | 10.71622 | 1086.713 | 10.72422 |

|          |          |          |          |          |          |          |          |          |
|----------|----------|----------|----------|----------|----------|----------|----------|----------|
| 10.80317 | 1103.112 | 10.68553 | 1095.842 | 10.77    | 1088.147 | 10.71886 | 1086.5   | 10.72547 |
| 10.80605 | 1103.315 | 10.68729 | 1095.766 | 10.77222 | 1088.097 | 10.72    | 1086.41  | 10.72673 |
| 10.80894 | 1103.524 | 10.69    | 1095.651 | 10.77426 | 1088.056 | 10.72188 | 1086.262 | 10.72893 |
| 10.81    | 1103.602 | 10.69202 | 1095.567 | 10.77631 | 1088.018 | 10.72356 | 1086.132 | 10.73    |
| 10.8133  | 1103.849 | 10.69379 | 1095.497 | 10.77836 | 1087.982 | 10.72523 | 1086.003 | 10.73163 |
| 10.81629 | 1104.087 | 10.69538 | 1095.435 | 10.78    | 1087.954 | 10.72691 | 1085.877 | 10.73309 |
| 10.81929 | 1104.332 | 10.69697 | 1095.375 | 10.78234 | 1087.917 | 10.72984 | 1085.657 | 10.73455 |
| 10.82043 | 1104.427 | 10.69856 | 1095.316 | 10.78449 | 1087.888 | 10.73101 | 1085.571 | 10.73602 |
| 10.82342 | 1104.679 | 10.7     | 1095.264 | 10.78665 | 1087.862 | 10.73205 | 1085.495 | 10.73858 |
| 10.82653 | 1104.954 | 10.70182 | 1095.199 | 10.7888  | 1087.839 | 10.73387 | 1085.364 | 10.74    |
| 10.82963 | 1105.238 | 10.70339 | 1095.146 | 10.79    | 1087.827 | 10.73551 | 1085.248 | 10.74182 |
| 10.83355 | 1105.604 | 10.70497 | 1095.094 | 10.79246 | 1087.805 | 10.73714 | 1085.133 | 10.74345 |
| 10.83675 | 1105.92  | 10.70654 | 1095.043 | 10.79472 | 1087.789 | 10.73878 | 1085.019 | 10.74507 |
| 10.83996 | 1106.246 | 10.71    | 1094.935 | 10.79699 | 1087.777 | 10.74    | 1084.935 | 10.74669 |
| 10.84367 | 1106.629 | 10.7118  | 1094.882 | 10.79925 | 1087.769 | 10.74187 | 1084.807 | 10.74953 |
| 10.84697 | 1106.989 | 10.71347 | 1094.835 | 10.80032 | 1087.766 | 10.74338 | 1084.707 | 10.75098 |
| 10.85    | 1107.327 | 10.71513 | 1094.79  | 10.80259 | 1087.76  | 10.74489 | 1084.607 | 10.75199 |
| 10.85378 | 1107.756 | 10.7168  | 1094.746 | 10.80496 | 1087.761 | 10.7464  | 1084.509 | 10.75376 |
| 10.85718 | 1108.163 | 10.72    | 1094.666 | 10.80733 | 1087.765 | 10.75    | 1084.278 | 10.75535 |
| 10.86    | 1108.508 | 10.7219  | 1094.621 | 10.80971 | 1087.774 | 10.75172 | 1084.169 | 10.75693 |
| 10.86389 | 1108.99  | 10.72367 | 1094.582 | 10.81271 | 1087.787 | 10.75332 | 1084.072 | 10.75852 |
| 10.86738 | 1109.446 | 10.72544 | 1094.545 | 10.8152  | 1087.806 | 10.75491 | 1083.975 | 10.76    |
| 10.87    | 1109.796 | 10.72721 | 1094.51  | 10.81768 | 1087.829 | 10.75651 | 1083.88  | 10.76182 |
| 10.87399 | 1110.335 | 10.73    | 1094.458 | 10.82    | 1087.854 | 10.76    | 1083.676 | 10.76328 |
| 10.87756 | 1110.842 | 10.73202 | 1094.422 | 10.82284 | 1087.887 | 10.76182 | 1083.572 | 10.76475 |
| 10.88    | 1111.196 | 10.73389 | 1094.393 | 10.82544 | 1087.926 | 10.76352 | 1083.478 | 10.76622 |
| 10.88408 | 1111.795 | 10.73576 | 1094.366 | 10.82804 | 1087.969 | 10.76521 | 1083.385 | 10.77    |
| 10.88771 | 1112.355 | 10.73764 | 1094.341 | 10.83    | 1088.005 | 10.7669  | 1083.294 | 10.77168 |
| 10.89    | 1112.713 | 10.74    | 1094.312 | 10.83297 | 1088.062 | 10.77    | 1083.131 | 10.77323 |
| 10.89416 | 1113.374 | 10.74214 | 1094.288 | 10.83568 | 1088.123 | 10.77194 | 1083.032 | 10.77478 |
| 10.89784 | 1113.987 | 10.74412 | 1094.27  | 10.83839 | 1088.19  | 10.77373 | 1082.943 | 10.77634 |
| 10.9     | 1114.353 | 10.74609 | 1094.255 | 10.84    | 1088.231 | 10.77553 | 1082.855 | 10.78    |
| 10.90421 | 1115.075 | 10.74807 | 1094.242 | 10.8431  | 1088.314 | 10.77733 | 1082.769 | 10.78177 |
| 10.91    | 1116.129 | 10.75    | 1094.231 | 10.84593 | 1088.4   | 10.78    | 1082.645 | 10.78343 |
| 10.91421 | 1116.906 | 10.75226 | 1094.22  | 10.84875 | 1088.492 | 10.78205 | 1082.551 | 10.78508 |
| 10.92    | 1118.039 | 10.75434 | 1094.215 | 10.85    | 1088.534 | 10.78396 | 1082.468 | 10.78673 |
| 10.92335 | 1118.701 | 10.75642 | 1094.213 | 10.85323 | 1088.647 | 10.78586 | 1082.387 | 10.79    |
| 10.92442 | 1118.916 | 10.75851 | 1094.214 | 10.85617 | 1088.76  | 10.78776 | 1082.308 | 10.79189 |
| 10.9264  | 1119.317 | 10.76    | 1094.216 | 10.85911 | 1088.881 | 10.79    | 1082.217 | 10.79364 |
| 10.92744 | 1119.529 | 10.76238 | 1094.22  | 10.86042 | 1088.936 | 10.79217 | 1082.132 | 10.7954  |
| 10.92847 | 1119.743 | 10.76457 | 1094.23  | 10.86336 | 1089.062 | 10.79418 | 1082.056 | 10.79715 |
| 10.92951 | 1119.957 | 10.76676 | 1094.243 | 10.86641 | 1089.206 | 10.79619 | 1081.983 | 10.8     |
| 10.93107 | 1120.281 | 10.76895 | 1094.259 | 10.86947 | 1089.358 | 10.7982  | 1081.913 | 10.80201 |
| 10.93245 | 1120.568 | 10.77    | 1094.268 | 10.87349 | 1089.564 | 10.8     | 1081.851 | 10.80386 |
| 10.93442 | 1120.983 | 10.7725  | 1094.29  | 10.87666 | 1089.741 | 10.80229 | 1081.774 | 10.80572 |
| 10.9357  | 1121.256 | 10.7748  | 1094.317 | 10.87982 | 1089.927 | 10.80441 | 1081.708 | 10.80758 |
| 10.93699 | 1121.531 | 10.7771  | 1094.347 | 10.88362 | 1090.156 | 10.80652 | 1081.645 | 10.81    |

|          |          |          |          |          |          |          |          |          |
|----------|----------|----------|----------|----------|----------|----------|----------|----------|
| 10.93827 | 1121.808 | 10.7794  | 1094.381 | 10.88689 | 1090.369 | 10.80864 | 1081.585 | 10.81212 |
| 10.94    | 1122.183 | 10.78263 | 1094.432 | 10.89    | 1090.58  | 10.81    | 1081.547 | 10.81409 |
| 10.94147 | 1122.504 | 10.78504 | 1094.477 | 10.89374 | 1090.84  | 10.81242 | 1081.481 | 10.81605 |
| 10.94305 | 1122.852 | 10.78745 | 1094.527 | 10.89712 | 1091.092 | 10.81464 | 1081.426 | 10.81802 |
| 10.94535 | 1123.364 | 10.78985 | 1094.581 | 10.9     | 1091.314 | 10.81687 | 1081.374 | 10.82    |
| 10.94686 | 1123.703 | 10.79275 | 1094.648 | 10.90386 | 1091.619 | 10.81909 | 1081.326 | 10.82225 |
| 10.94838 | 1124.045 | 10.79527 | 1094.715 | 10.90735 | 1091.913 | 10.82032 | 1081.3   | 10.82432 |
| 10.94989 | 1124.39  | 10.79779 | 1094.786 | 10.91    | 1092.144 | 10.82254 | 1081.254 | 10.82639 |
| 10.95173 | 1124.811 | 10.8     | 1094.852 | 10.91398 | 1092.498 | 10.82488 | 1081.212 | 10.82846 |
| 10.95293 | 1125.09  | 10.80288 | 1094.941 | 10.91512 | 1092.602 | 10.82721 | 1081.173 | 10.83    |
| 10.95414 | 1125.37  | 10.80551 | 1095.031 | 10.91712 | 1092.791 | 10.82955 | 1081.138 | 10.83237 |
| 10.95534 | 1125.652 | 10.80815 | 1095.126 | 10.92    | 1093.071 | 10.83267 | 1081.095 | 10.83455 |
| 10.95753 | 1126.168 | 10.81    | 1095.196 | 10.92229 | 1093.296 | 10.83511 | 1081.067 | 10.83673 |
| 10.95972 | 1126.689 | 10.81301 | 1095.312 | 10.92584 | 1093.662 | 10.83756 | 1081.044 | 10.83891 |
| 10.96229 | 1127.307 | 10.81419 | 1095.36  | 10.92938 | 1094.041 | 10.84    | 1081.025 | 10.84    |
| 10.96426 | 1127.788 | 10.81532 | 1095.407 | 10.93051 | 1094.163 | 10.8428  | 1081.005 | 10.84249 |
| 10.96697 | 1128.457 | 10.81673 | 1095.467 | 10.93405 | 1094.552 | 10.84536 | 1080.994 | 10.84478 |
| 10.96968 | 1129.135 | 10.81807 | 1095.526 | 10.93779 | 1094.986 | 10.84792 | 1080.988 | 10.84708 |
| 10.9731  | 1129.995 | 10.82    | 1095.613 | 10.94    | 1095.248 | 10.85    | 1080.986 | 10.84937 |
| 10.9754  | 1130.586 | 10.82107 | 1095.662 | 10.94427 | 1095.764 | 10.85293 | 1080.986 | 10.85262 |
| 10.97771 | 1131.183 | 10.82378 | 1095.795 | 10.95    | 1096.509 | 10.8556  | 1080.995 | 10.85502 |
| 10.98    | 1131.784 | 10.8265  | 1095.933 | 10.95427 | 1097.073 | 10.85828 | 1081.008 | 10.85743 |
| 10.98263 | 1132.476 | 10.83    | 1096.121 | 10.96    | 1097.885 | 10.86    | 1081.019 | 10.85983 |
| 10.98655 | 1133.531 | 10.83311 | 1096.292 | 10.96427 | 1098.5   | 10.86306 | 1081.041 | 10.86275 |
| 10.98784 | 1133.879 | 10.83607 | 1096.467 | 10.97    | 1099.383 | 10.86585 | 1081.071 | 10.86527 |
| 10.98923 | 1134.258 | 10.83903 | 1096.649 | 10.97427 | 1100.051 | 10.86864 | 1081.107 | 10.86778 |
| 10.99043 | 1134.586 | 10.84042 | 1096.736 | 10.97823 | 1100.704 | 10.87    | 1081.126 | 10.87    |
| 10.99147 | 1134.87  | 10.84338 | 1096.925 | 10.97981 | 1100.964 | 10.87319 | 1081.173 | 10.87288 |
| 10.99308 | 1135.311 | 10.84647 | 1097.134 | 10.98108 | 1101.177 | 10.87609 | 1081.226 | 10.87551 |
| 10.99498 | 1135.836 | 10.84955 | 1097.353 | 10.98309 | 1101.517 | 10.879   | 1081.286 | 10.87814 |
| 10.99604 | 1136.131 | 10.85352 | 1097.64  | 10.9841  | 1101.687 | 10.88042 | 1081.317 | 10.88    |
| 10.99758 | 1136.399 | 10.85671 | 1097.887 | 10.98515 | 1101.867 | 10.88332 | 1081.383 | 10.88301 |
| 10.99926 | 1136.44  | 10.8599  | 1098.143 | 10.98629 | 1102.063 | 10.88634 | 1081.463 | 10.88576 |
| 11.00099 | 1136.435 | 10.86365 | 1098.45  | 10.98787 | 1102.337 | 10.88936 | 1081.55  | 10.88851 |
| 11.00255 | 1136.533 | 10.86694 | 1098.736 | 10.98965 | 1102.649 | 10.89043 | 1081.581 | 10.89    |
| 11.00393 | 1136.675 | 10.87    | 1099.011 | 10.99103 | 1102.894 | 10.89345 | 1081.674 | 10.89314 |
| 11.00576 | 1136.853 | 10.87377 | 1099.356 | 10.99287 | 1103.223 | 10.89659 | 1081.783 | 10.89601 |
| 11.00741 | 1136.979 | 10.87716 | 1099.686 | 10.99392 | 1103.411 | 10.89973 | 1081.901 | 10.89887 |
| 11.00906 | 1137.078 | 10.88    | 1099.969 | 10.99591 | 1103.773 | 10.90358 | 1082.05  | 10.9     |
| 11.01024 | 1137.142 | 10.88388 | 1100.363 | 10.99816 | 1104.185 | 10.90683 | 1082.191 | 10.90328 |
| 11.01174 | 1137.245 | 10.88737 | 1100.738 | 10.99972 | 1104.474 | 10.91    | 1082.338 | 10.90626 |
| 11.01313 | 1137.358 | 10.89    | 1101.028 | 11.00104 | 1104.72  | 10.91371 | 1082.514 | 10.90924 |
| 11.01505 | 1137.513 | 10.89399 | 1101.475 | 11.00286 | 1105.063 | 10.91707 | 1082.69  | 10.91043 |
| 11.01627 | 1137.604 | 10.89757 | 1101.898 | 11.00536 | 1105.539 | 10.92    | 1082.851 | 10.91341 |
| 11.0184  | 1137.757 | 10.9     | 1102.192 | 11.00695 | 1105.845 | 10.92384 | 1083.068 | 10.91651 |
| 11.02    | 1137.871 | 10.90409 | 1102.695 | 11.00973 | 1106.387 | 10.92731 | 1083.281 | 10.91961 |
| 11.0215  | 1137.983 | 10.90775 | 1103.17  | 11.01092 | 1106.62  | 10.93    | 1083.454 | 10.92354 |

|          |          |          |          |          |          |          |          |          |
|----------|----------|----------|----------|----------|----------|----------|----------|----------|
| 11.02282 | 1138.085 | 10.91    | 1103.467 | 11.01345 | 1107.124 | 10.93396 | 1083.715 | 10.92676 |
| 11.02415 | 1138.187 | 10.91418 | 1104.028 | 11.01506 | 1107.448 | 10.93753 | 1083.969 | 10.92998 |
| 11.02647 | 1138.364 | 10.92    | 1104.865 | 11.01788 | 1108.024 | 10.94    | 1084.151 | 10.93368 |
| 11.02879 | 1138.541 | 10.92418 | 1105.475 | 11.02    | 1108.461 | 10.94408 | 1084.459 | 10.93701 |
| 11.03    | 1138.633 | 10.93    | 1106.382 | 11.02322 | 1109.13  | 10.94776 | 1084.758 | 10.94    |
| 11.03265 | 1138.836 | 10.93418 | 1107.044 | 11.02584 | 1109.687 | 10.95    | 1084.945 | 10.94381 |
| 11.03497 | 1139.017 | 10.94    | 1108.025 | 11.02846 | 1110.251 | 10.9542  | 1085.303 | 10.94725 |
| 11.03697 | 1139.172 | 10.94418 | 1108.74  | 11.03    | 1110.585 | 10.96    | 1085.848 | 10.95    |
| 11.03896 | 1139.328 | 10.95    | 1109.797 | 11.03299 | 1111.238 | 10.9642  | 1086.25  | 10.95394 |
| 11.04    | 1139.409 | 10.95165 | 1110.1   | 11.03546 | 1111.787 | 10.97    | 1086.856 | 10.95749 |
| 11.04228 | 1139.588 | 10.95288 | 1110.326 | 11.03783 | 1112.322 | 10.9742  | 1087.303 | 10.96    |
| 11.04427 | 1139.746 | 10.95434 | 1110.598 | 11.03912 | 1112.612 | 10.98    | 1087.974 | 10.96406 |
| 11.04607 | 1139.889 | 10.95565 | 1110.844 | 11.04078 | 1112.991 | 10.9842  | 1088.468 | 10.96773 |
| 11.04889 | 1140.115 | 10.95681 | 1111.061 | 11.0419  | 1113.247 | 10.99    | 1089.207 | 10.97    |
| 11.05    | 1140.204 | 10.95829 | 1111.343 | 11.04294 | 1113.487 | 10.9942  | 1089.749 | 10.97419 |
| 11.05322 | 1140.464 | 10.95981 | 1111.633 | 11.04398 | 1113.726 | 11       | 1090.557 | 10.98    |
| 11.05813 | 1140.865 | 10.96087 | 1111.837 | 11.0458  | 1114.148 | 11.0042  | 1091.15  | 10.98419 |
| 11.06    | 1141.019 | 10.96231 | 1112.116 | 11.0478  | 1114.613 | 11.00635 | 1091.467 | 10.99    |
| 11.06561 | 1141.483 | 10.96403 | 1112.454 | 11.04968 | 1115.05  | 11.00735 | 1091.615 | 10.99419 |
| 11.07    | 1141.851 | 10.96508 | 1112.66  | 11.051   | 1115.36  | 11.00882 | 1091.834 | 11       |
| 11.07561 | 1142.325 | 10.96612 | 1112.867 | 11.05231 | 1115.67  | 11.01    | 1092.011 | 11.00419 |
| 11.08    | 1142.702 | 10.96832 | 1113.305 | 11.05526 | 1116.369 | 11.01125 | 1092.2   | 11.01    |
| 11.08561 | 1143.188 | 10.97    | 1113.645 | 11.05722 | 1116.836 | 11.01235 | 1092.368 | 11.01419 |
| 11.09    | 1143.573 | 10.97119 | 1113.886 | 11.05918 | 1117.306 | 11.01404 | 1092.627 | 11.02    |
| 11.09561 | 1144.069 | 10.97272 | 1114.2   | 11.06028 | 1117.572 | 11.01518 | 1092.804 | 11.02419 |
| 11.1     | 1144.463 | 10.97438 | 1114.541 | 11.06145 | 1117.854 | 11.01647 | 1093.005 | 11.03    |
| 11.10561 | 1144.97  | 10.97665 | 1115.015 | 11.06288 | 1118.203 | 11.01824 | 1093.284 | 11.03419 |
| 11.11    | 1145.372 | 10.9781  | 1115.319 | 11.06416 | 1118.515 | 11.01937 | 1093.464 | 11.03569 |
| 11.11561 | 1145.891 | 10.98    | 1115.721 | 11.06539 | 1118.812 | 11.02129 | 1093.772 | 11.03712 |
| 11.12    | 1146.302 | 10.98165 | 1116.074 | 11.06653 | 1118.993 | 11.02262 | 1093.988 | 11.0382  |
| 11.12561 | 1146.831 | 10.9831  | 1116.386 | 11.06833 | 1119.089 | 11.02379 | 1094.179 | 11.03928 |
| 11.13    | 1147.251 | 10.98431 | 1116.649 | 11.06956 | 1119.104 | 11.02495 | 1094.371 | 11.04033 |
| 11.13272 | 1147.512 | 10.98552 | 1116.912 | 11.07129 | 1119.191 | 11.02597 | 1094.54  | 11.0415  |
| 11.13502 | 1147.732 | 10.98744 | 1117.337 | 11.0733  | 1119.408 | 11.02771 | 1094.83  | 11.04259 |
| 11.13653 | 1147.866 | 10.98937 | 1117.765 | 11.07449 | 1119.531 | 11.02936 | 1095.108 | 11.04436 |
| 11.13795 | 1147.984 | 10.9922  | 1118.399 | 11.07567 | 1119.639 | 11.03094 | 1095.377 | 11.04591 |
| 11.13937 | 1148.091 | 10.995   | 1119.04  | 11.07774 | 1119.809 | 11.03263 | 1095.667 | 11.04738 |
| 11.14163 | 1148.249 | 10.99781 | 1119.689 | 11.07981 | 1119.969 | 11.0337  | 1095.851 | 11.04867 |
| 11.14305 | 1148.331 | 11       | 1120.202 | 11.08237 | 1120.176 | 11.03476 | 1096.038 | 11.04995 |
| 11.14433 | 1148.399 | 11.0032  | 1120.957 | 11.08398 | 1120.324 | 11.03583 | 1096.225 | 11.05147 |
| 11.14561 | 1148.461 | 11.00601 | 1121.632 | 11.0856  | 1120.468 | 11.0377  | 1096.554 | 11.05304 |
| 11.14689 | 1148.517 | 11.00853 | 1122.246 | 11.08722 | 1120.607 | 11.03957 | 1096.887 | 11.05456 |
| 11.15    | 1148.642 | 11.01    | 1122.605 | 11.09    | 1120.845 | 11.04195 | 1097.317 | 11.05627 |
| 11.15146 | 1148.696 | 11.01204 | 1123.108 | 11.09185 | 1121.003 | 11.04346 | 1097.594 | 11.05746 |
| 11.15529 | 1148.827 | 11.01325 | 1123.406 | 11.09336 | 1121.136 | 11.04876 | 1098.59  | 11.05894 |
| 11.15827 | 1148.927 | 11.01517 | 1123.887 | 11.09488 | 1121.269 | 11.05    | 1098.826 | 11.06    |
| 11.16    | 1148.983 | 11.01652 | 1124.227 | 11.09696 | 1121.452 | 11.05605 | 1099.988 | 11.06155 |

|          |          |          |          |          |          |          |          |          |
|----------|----------|----------|----------|----------|----------|----------|----------|----------|
| 11.16107 | 1149.018 | 11.01771 | 1124.527 | 11.09904 | 1121.636 | 11.06    | 1100.775 | 11.06266 |
| 11.16219 | 1149.052 | 11.019   | 1124.853 | 11.1003  | 1121.747 | 11.06373 | 1101.526 | 11.06378 |
| 11.16417 | 1149.109 | 11.02012 | 1125.136 | 11.10238 | 1121.931 | 11.0649  | 1101.765 | 11.06489 |
| 11.16614 | 1149.16  | 11.02115 | 1125.401 | 11.10641 | 1122.293 | 11.06634 | 1102.061 | 11.06749 |
| 11.16811 | 1149.206 | 11.02225 | 1125.681 | 11.10963 | 1122.584 | 11.06746 | 1102.293 | 11.07    |
| 11.17    | 1149.245 | 11.02416 | 1126.173 | 11.11369 | 1122.952 | 11.0687  | 1102.55  | 11.0727  |
| 11.17225 | 1149.286 | 11.02559 | 1126.54  | 11.12    | 1123.535 | 11.06982 | 1102.783 | 11.0748  |
| 11.17818 | 1149.341 | 11.02718 | 1126.953 | 11.12369 | 1123.877 | 11.07101 | 1103.032 | 11.08    |
| 11.18    | 1149.355 | 11.02852 | 1127.3   | 11.13    | 1124.473 | 11.07232 | 1103.307 | 11.0824  |
| 11.18678 | 1149.394 | 11.03    | 1127.561 | 11.13369 | 1124.822 | 11.07385 | 1103.628 | 11.08491 |
| 11.19    | 1149.407 | 11.03139 | 1127.622 | 11.14    | 1125.431 | 11.07552 | 1103.983 | 11.08741 |
| 11.192   | 1149.41  | 11.03351 | 1127.622 | 11.14369 | 1125.788 | 11.07657 | 1104.206 | 11.08972 |
| 11.19403 | 1149.414 | 11.03489 | 1127.692 | 11.15    | 1126.41  | 11.07763 | 1104.43  | 11.09104 |
| 11.19757 | 1149.417 | 11.03627 | 1127.834 | 11.15369 | 1126.774 | 11.07942 | 1104.815 | 11.09243 |
| 11.2     | 1149.419 | 11.03814 | 1128.057 | 11.16    | 1127.408 | 11.08089 | 1105.129 | 11.09353 |
| 11.20405 | 1149.419 | 11.04    | 1128.236 | 11.16369 | 1127.78  | 11.08202 | 1105.373 | 11.09483 |
| 11.21    | 1149.406 | 11.04105 | 1128.302 | 11.17    | 1128.428 | 11.08456 | 1105.923 | 11.0959  |
| 11.21405 | 1149.396 | 11.04242 | 1128.372 | 11.17369 | 1128.808 | 11.08633 | 1106.309 | 11.09699 |
| 11.22    | 1149.375 | 11.04399 | 1128.477 | 11.18    | 1129.469 | 11.0881  | 1106.698 | 11.09805 |
| 11.22405 | 1149.361 | 11.04616 | 1128.66  | 11.18369 | 1129.856 | 11.09    | 1107.115 | 11.09977 |
| 11.23    | 1149.339 | 11.04753 | 1128.781 | 11.19    | 1130.531 | 11.09142 | 1107.43  | 11.10125 |
| 11.23405 | 1149.325 | 11.04994 | 1128.977 | 11.19369 | 1130.926 | 11.09292 | 1107.761 | 11.10294 |
| 11.24    | 1149.303 | 11.05251 | 1129.173 | 11.2     | 1131.614 | 11.09431 | 1108.071 | 11.10456 |
| 11.24405 | 1149.288 | 11.05468 | 1129.345 | 11.20369 | 1132.017 | 11.09553 | 1108.344 | 11.10649 |
| 11.24872 | 1149.271 | 11.05661 | 1129.502 | 11.21    | 1132.718 | 11.09674 | 1108.617 | 11.10842 |
| 11.24979 | 1149.267 | 11.0585  | 1129.657 | 11.21369 | 1133.129 | 11.09887 | 1109.097 | 11.11    |
| 11.25109 | 1149.262 | 11.06    | 1129.779 | 11.22    | 1133.844 | 11.1     | 1109.352 | 11.11139 |
| 11.25762 | 1149.237 | 11.06217 | 1129.956 | 11.22369 | 1134.263 | 11.10222 | 1109.859 | 11.11276 |
| 11.26    | 1149.228 | 11.06406 | 1130.112 | 11.23    | 1134.992 | 11.10365 | 1110.186 | 11.11396 |
| 11.26747 | 1149.201 | 11.06577 | 1130.253 | 11.23369 | 1135.419 | 11.10533 | 1110.573 | 11.11505 |
| 11.2687  | 1149.196 | 11.06748 | 1130.395 | 11.24    | 1136.163 | 11.10726 | 1110.923 | 11.11615 |
| 11.27    | 1149.191 | 11.06919 | 1130.537 | 11.24369 | 1136.598 | 11.10878 | 1110.975 | 11.11766 |
| 11.27137 | 1149.187 | 11.07024 | 1130.625 | 11.24872 | 1137.2   | 11.10999 | 1111.009 | 11.12    |
| 11.2796  | 1149.158 | 11.07195 | 1130.768 | 11.24984 | 1137.333 | 11.11139 | 1111.062 | 11.121   |
| 11.28118 | 1149.152 | 11.07396 | 1130.937 | 11.251   | 1137.473 | 11.11271 | 1111.184 | 11.12237 |
| 11.28941 | 1149.123 | 11.07596 | 1131.106 | 11.25396 | 1137.83  | 11.11402 | 1111.33  | 11.12472 |
| 11.29118 | 1149.117 | 11.08    | 1131.451 | 11.26    | 1138.568 | 11.11534 | 1111.472 | 11.12637 |
| 11.29941 | 1149.089 | 11.08229 | 1131.647 | 11.26338 | 1138.982 | 11.11994 | 1111.915 | 11.12927 |
| 11.30118 | 1149.083 | 11.08884 | 1132.217 | 11.27    | 1139.805 | 11.12144 | 1112.036 | 11.13041 |
| 11.30941 | 1149.056 | 11.09    | 1132.318 | 11.27338 | 1140.226 | 11.12282 | 1112.153 | 11.13302 |
| 11.31118 | 1149.05  | 11.09749 | 1132.976 | 11.28    | 1141.063 | 11.12523 | 1112.376 | 11.13563 |
| 11.31941 | 1149.024 | 11.1     | 1133.2   | 11.28338 | 1141.492 | 11.1274  | 1112.581 | 11.13797 |
| 11.32118 | 1149.019 | 11.10749 | 1133.873 | 11.29    | 1142.344 | 11.12957 | 1112.786 | 11.14    |
| 11.32941 | 1148.993 | 11.11    | 1134.102 | 11.29338 | 1142.78  | 11.13248 | 1113.06  | 11.14245 |
| 11.33118 | 1148.987 | 11.11749 | 1134.789 | 11.3     | 1143.648 | 11.13798 | 1113.583 | 11.14402 |
| 11.33941 | 1148.962 | 11.12    | 1135.023 | 11.30338 | 1144.091 | 11.14    | 1113.776 | 11.14558 |
| 11.34118 | 1148.957 | 11.12749 | 1135.725 | 11.31    | 1144.973 | 11.14629 | 1114.381 | 11.14715 |

|          |          |          |          |          |          |          |          |          |
|----------|----------|----------|----------|----------|----------|----------|----------|----------|
| 11.34941 | 1148.932 | 11.13    | 1135.964 | 11.31338 | 1145.425 | 11.15    | 1114.744 | 11.15    |
| 11.35118 | 1148.927 | 11.13749 | 1136.681 | 11.31742 | 1145.97  | 11.15629 | 1115.362 | 11.15134 |
| 11.35941 | 1148.903 | 11.14    | 1136.926 | 11.32    | 1146.314 | 11.16    | 1115.733 | 11.15295 |
| 11.36118 | 1148.898 | 11.14749 | 1137.658 | 11.32178 | 1146.536 | 11.16629 | 1116.363 | 11.15408 |
| 11.36941 | 1148.875 | 11.15    | 1137.907 | 11.32289 | 1146.663 | 11.17    | 1116.742 | 11.15592 |
| 11.37118 | 1148.87  | 11.15749 | 1138.655 | 11.32395 | 1146.776 | 11.17629 | 1117.385 | 11.15876 |
| 11.37941 | 1148.847 | 11.16    | 1138.909 | 11.32501 | 1146.882 | 11.18    | 1117.771 | 11.16    |
| 11.38118 | 1148.843 | 11.16749 | 1139.673 | 11.32607 | 1146.98  | 11.18629 | 1118.428 | 11.16325 |
| 11.38941 | 1148.82  | 11.17    | 1139.932 | 11.32791 | 1147.139 | 11.19    | 1118.822 | 11.17    |
| 11.39118 | 1148.816 | 11.17749 | 1140.711 | 11.32976 | 1147.279 | 11.19629 | 1119.492 | 11.17325 |
| 11.39941 | 1148.795 | 11.18    | 1140.976 | 11.33138 | 1147.385 | 11.2     | 1119.894 | 11.18    |
| 11.40118 | 1148.79  | 11.18749 | 1141.771 | 11.33263 | 1147.457 | 11.20629 | 1120.578 | 11.18325 |
| 11.40941 | 1148.77  | 11.19    | 1142.041 | 11.33387 | 1147.525 | 11.21    | 1120.988 | 11.19    |
| 11.41118 | 1148.765 | 11.19749 | 1142.852 | 11.33512 | 1147.591 | 11.21629 | 1121.685 | 11.19325 |
| 11.41941 | 1148.744 | 11.2     | 1143.127 | 11.33729 | 1147.703 | 11.22    | 1122.103 | 11.2     |
| 11.42118 | 1148.74  | 11.20749 | 1143.954 | 11.34    | 1147.841 | 11.22629 | 1122.814 | 11.20325 |
| 11.42941 | 1148.72  | 11.21    | 1144.235 | 11.34249 | 1147.967 | 11.23    | 1123.24  | 11.21    |
| 11.43118 | 1148.716 | 11.21749 | 1145.077 | 11.34385 | 1148.034 | 11.23629 | 1123.965 | 11.21325 |
| 11.43941 | 1148.698 | 11.22    | 1145.364 | 11.3452  | 1148.1   | 11.24    | 1124.399 | 11.22    |
| 11.44118 | 1148.694 | 11.22749 | 1146.223 | 11.34656 | 1148.164 | 11.24629 | 1125.137 | 11.22325 |
| 11.44941 | 1148.676 | 11.23    | 1146.515 | 11.35    | 1148.316 | 11.24874 | 1125.429 | 11.23    |
| 11.45118 | 1148.671 | 11.23128 | 1146.664 | 11.35155 | 1148.378 | 11.24974 | 1125.548 | 11.23325 |
| 11.45941 | 1148.653 | 11.23406 | 1146.972 | 11.35432 | 1148.464 | 11.25107 | 1125.706 | 11.24    |
| 11.46118 | 1148.649 | 11.23612 | 1147.179 | 11.35655 | 1148.52  | 11.25461 | 1126.132 | 11.24325 |
| 11.46941 | 1148.631 | 11.23817 | 1147.363 | 11.36    | 1148.583 | 11.26    | 1126.786 | 11.24874 |
| 11.47118 | 1148.628 | 11.2399  | 1147.503 | 11.36254 | 1148.624 | 11.26405 | 1127.279 | 11.24976 |
| 11.47941 | 1148.611 | 11.2418  | 1147.643 | 11.36595 | 1148.66  | 11.27    | 1128.013 | 11.2511  |
| 11.48118 | 1148.608 | 11.243   | 1147.722 | 11.37    | 1148.694 | 11.27405 | 1128.515 | 11.2549  |
| 11.48941 | 1148.593 | 11.2442  | 1147.796 | 11.3739  | 1148.725 | 11.28    | 1129.263 | 11.26    |
| 11.49118 | 1148.589 | 11.2454  | 1147.865 | 11.37731 | 1148.747 | 11.28405 | 1129.774 | 11.26435 |
| 11.49941 | 1148.57  | 11.24875 | 1148.041 | 11.38    | 1148.762 | 11.29    | 1130.535 | 11.27    |
| 11.50118 | 1148.567 | 11.24988 | 1148.094 | 11.38307 | 1148.777 | 11.29405 | 1131.055 | 11.27435 |
| 11.50859 | 1148.555 | 11.25124 | 1148.155 | 11.38766 | 1148.788 | 11.3     | 1131.829 | 11.28    |
| 11.51    | 1148.552 | 11.25329 | 1148.244 | 11.39    | 1148.791 | 11.30405 | 1132.358 | 11.28435 |
| 11.51106 | 1148.55  | 11.25535 | 1148.332 | 11.39524 | 1148.794 | 11.31    | 1133.145 | 11.29    |
| 11.51847 | 1148.538 | 11.2574  | 1148.417 | 11.4     | 1148.787 | 11.31405 | 1133.684 | 11.29435 |
| 11.52    | 1148.535 | 11.26    | 1148.521 | 11.40524 | 1148.778 | 11.32    | 1134.485 | 11.3     |
| 11.52106 | 1148.533 | 11.26235 | 1148.61  | 11.41    | 1148.769 | 11.32405 | 1135.032 | 11.30435 |
| 11.52847 | 1148.521 | 11.2644  | 1148.679 | 11.41524 | 1148.76  | 11.33    | 1135.847 | 11.31    |
| 11.53    | 1148.518 | 11.26619 | 1148.732 | 11.42    | 1148.75  | 11.33405 | 1136.404 | 11.31435 |
| 11.531   | 1148.516 | 11.26906 | 1148.801 | 11.42524 | 1148.739 | 11.34    | 1137.233 | 11.32    |
| 11.53237 | 1148.514 | 11.27041 | 1148.831 | 11.43    | 1148.727 | 11.34405 | 1137.799 | 11.32435 |
| 11.54    | 1148.501 | 11.27328 | 1148.886 | 11.43524 | 1148.714 | 11.35    | 1138.641 | 11.33    |
| 11.54134 | 1148.499 | 11.27736 | 1148.931 | 11.44    | 1148.702 | 11.35405 | 1139.217 | 11.33435 |
| 11.54958 | 1148.486 | 11.28    | 1148.955 | 11.44524 | 1148.69  | 11.36    | 1140.074 | 11.34    |
| 11.55118 | 1148.483 | 11.28466 | 1148.99  | 11.45    | 1148.679 | 11.36405 | 1140.659 | 11.34435 |
| 11.55941 | 1148.471 | 11.28875 | 1149.011 | 11.45524 | 1148.667 | 11.37    | 1141.529 | 11.35    |



|          |          |          |          |          |          |          |          |          |
|----------|----------|----------|----------|----------|----------|----------|----------|----------|
| 11.56118 | 1148.468 | 11.29    | 1149.017 | 11.46    | 1148.657 | 11.37405 | 1142.124 | 11.35435 |
| 11.56941 | 1148.456 | 11.29426 | 1149.032 | 11.46524 | 1148.645 | 11.38    | 1143.009 | 11.36    |
| 11.57118 | 1148.453 | 11.29717 | 1149.04  | 11.46856 | 1148.638 | 11.38405 | 1143.613 | 11.36435 |
| 11.57941 | 1148.442 | 11.3     | 1149.044 | 11.47    | 1148.635 | 11.39    | 1144.512 | 11.37    |
| 11.58118 | 1148.439 | 11.30333 | 1149.048 | 11.47319 | 1148.628 | 11.39405 | 1145.126 | 11.37435 |
| 11.58941 | 1148.428 | 11.31    | 1149.04  | 11.48    | 1148.614 | 11.39564 | 1145.369 | 11.38    |
| 11.59118 | 1148.425 | 11.31333 | 1149.035 | 11.48313 | 1148.607 | 11.39746 | 1145.644 | 11.38435 |
| 11.59941 | 1148.415 | 11.32    | 1149.019 | 11.49    | 1148.594 | 11.39894 | 1145.858 | 11.39    |
| 11.60118 | 1148.412 | 11.32333 | 1149.011 | 11.49313 | 1148.588 | 11.4     | 1146.002 | 11.39435 |
| 11.60941 | 1148.402 | 11.33    | 1148.993 | 11.5     | 1148.575 | 11.40169 | 1146.225 | 11.4     |
| 11.61118 | 1148.4   | 11.33333 | 1148.984 | 11.50313 | 1148.569 | 11.40318 | 1146.393 | 11.40435 |
| 11.61941 | 1148.39  | 11.34    | 1148.965 | 11.51    | 1148.556 | 11.40433 | 1146.514 | 11.41    |
| 11.62118 | 1148.388 | 11.34333 | 1148.955 | 11.51313 | 1148.55  | 11.40547 | 1146.625 | 11.41435 |
| 11.62941 | 1148.378 | 11.35    | 1148.936 | 11.52    | 1148.538 | 11.40662 | 1146.728 | 11.42    |
| 11.63118 | 1148.376 | 11.35333 | 1148.926 | 11.52313 | 1148.533 | 11.40888 | 1146.912 | 11.42435 |
| 11.63941 | 1148.368 | 11.36    | 1148.906 | 11.53    | 1148.521 | 11.41    | 1146.994 | 11.43    |
| 11.64118 | 1148.366 | 11.36333 | 1148.896 | 11.53149 | 1148.519 | 11.41224 | 1147.137 | 11.43435 |
| 11.64941 | 1148.357 | 11.36874 | 1148.881 | 11.53507 | 1148.513 | 11.4136  | 1147.22  | 11.44    |
| 11.65118 | 1148.355 | 11.37    | 1148.877 | 11.54    | 1148.504 | 11.41559 | 1147.337 | 11.44435 |
| 11.65941 | 1148.348 | 11.37674 | 1148.858 | 11.54409 | 1148.498 | 11.41736 | 1147.441 | 11.45    |
| 11.66118 | 1148.346 | 11.38    | 1148.849 | 11.55    | 1148.488 | 11.41957 | 1147.568 | 11.45435 |
| 11.66941 | 1148.336 | 11.38662 | 1148.831 | 11.55409 | 1148.482 | 11.42081 | 1147.639 | 11.46    |
| 11.67118 | 1148.334 | 11.39    | 1148.822 | 11.56    | 1148.473 | 11.42316 | 1147.77  | 11.46435 |
| 11.67859 | 1148.33  | 11.39662 | 1148.805 | 11.56409 | 1148.467 | 11.42466 | 1147.851 | 11.46721 |
| 11.68    | 1148.328 | 11.4     | 1148.796 | 11.57    | 1148.458 | 11.42616 | 1147.927 | 11.47    |
| 11.68106 | 1148.328 | 11.40662 | 1148.779 | 11.57409 | 1148.452 | 11.42878 | 1148.052 | 11.47146 |
| 11.68847 | 1148.321 | 11.41    | 1148.77  | 11.58    | 1148.444 | 11.43    | 1148.105 | 11.47338 |
| 11.69    | 1148.32  | 11.41662 | 1148.754 | 11.58409 | 1148.438 | 11.43273 | 1148.202 | 11.47439 |
| 11.69106 | 1148.319 | 11.42    | 1148.746 | 11.59    | 1148.43  | 11.43509 | 1148.269 | 11.4754  |
| 11.69847 | 1148.313 | 11.42662 | 1148.73  | 11.59409 | 1148.425 | 11.44    | 1148.363 | 11.47641 |
| 11.7     | 1148.312 | 11.43    | 1148.722 | 11.6     | 1148.417 | 11.4427  | 1148.41  | 11.47767 |
| 11.70106 | 1148.311 | 11.43662 | 1148.706 | 11.60409 | 1148.412 | 11.4455  | 1148.444 | 11.47925 |
| 11.70847 | 1148.305 | 11.44    | 1148.699 | 11.61    | 1148.405 | 11.44829 | 1148.475 | 11.48164 |
| 11.71    | 1148.304 | 11.44662 | 1148.683 | 11.61409 | 1148.4   | 11.45    | 1148.492 | 11.48264 |
| 11.71106 | 1148.303 | 11.45    | 1148.676 | 11.62    | 1148.393 | 11.4532  | 1148.522 | 11.48467 |
| 11.71847 | 1148.299 | 11.45662 | 1148.661 | 11.62409 | 1148.388 | 11.456   | 1148.544 | 11.48636 |
| 11.72    | 1148.298 | 11.46    | 1148.654 | 11.63    | 1148.381 | 11.45852 | 1148.562 | 11.48933 |
| 11.72106 | 1148.297 | 11.46662 | 1148.64  | 11.63409 | 1148.377 | 11.46    | 1148.571 | 11.49042 |
| 11.72847 | 1148.292 | 11.47    | 1148.633 | 11.64    | 1148.37  | 11.46288 | 1148.588 | 11.49189 |
| 11.73    | 1148.291 | 11.47662 | 1148.619 | 11.64409 | 1148.366 | 11.46776 | 1148.6   | 11.49353 |
| 11.73106 | 1148.29  | 11.48    | 1148.613 | 11.65    | 1148.36  | 11.47    | 1148.603 | 11.49499 |
| 11.73847 | 1148.285 | 11.48662 | 1148.599 | 11.65409 | 1148.356 | 11.47558 | 1148.608 | 11.49644 |
| 11.74    | 1148.284 | 11.49    | 1148.593 | 11.66    | 1148.35  | 11.48    | 1148.604 | 11.4979  |
| 11.74106 | 1148.284 | 11.49662 | 1148.58  | 11.66409 | 1148.346 | 11.48558 | 1148.598 | 11.5     |
| 11.74847 | 1148.279 | 11.5     | 1148.574 | 11.67    | 1148.34  | 11.49    | 1148.593 | 11.50166 |
| 11.75    | 1148.278 | 11.50662 | 1148.561 | 11.67409 | 1148.337 | 11.49558 | 1148.586 | 11.5043  |
| 11.75106 | 1148.278 | 11.51    | 1148.555 | 11.68    | 1148.331 | 11.5     | 1148.579 | 11.50636 |

|          |          |          |          |          |          |          |          |          |
|----------|----------|----------|----------|----------|----------|----------|----------|----------|
| 11.75847 | 1148.275 | 11.51662 | 1148.543 | 11.68409 | 1148.328 | 11.50558 | 1148.569 | 11.51    |
| 11.76    | 1148.274 | 11.52    | 1148.537 | 11.69    | 1148.323 | 11.51    | 1148.561 | 11.51235 |
| 11.76106 | 1148.273 | 11.52662 | 1148.526 | 11.69409 | 1148.32  | 11.51558 | 1148.549 | 11.5152  |
| 11.76847 | 1148.269 | 11.53    | 1148.52  | 11.7     | 1148.315 | 11.52    | 1148.541 | 11.51807 |
| 11.77    | 1148.268 | 11.53101 | 1148.518 | 11.70409 | 1148.312 | 11.52558 | 1148.53  | 11.52    |
| 11.77106 | 1148.268 | 11.5323  | 1148.516 | 11.71    | 1148.308 | 11.53    | 1148.522 | 11.52329 |
| 11.77847 | 1148.264 | 11.53979 | 1148.504 | 11.71409 | 1148.305 | 11.53112 | 1148.521 | 11.52616 |
| 11.78    | 1148.263 | 11.54107 | 1148.502 | 11.72    | 1148.3   | 11.53248 | 1148.518 | 11.52853 |
| 11.78106 | 1148.263 | 11.54857 | 1148.49  | 11.72409 | 1148.298 | 11.53992 | 1148.506 | 11.53    |
| 11.78847 | 1148.259 | 11.55    | 1148.487 | 11.73    | 1148.294 | 11.54106 | 1148.504 | 11.53153 |
| 11.79    | 1148.259 | 11.55107 | 1148.486 | 11.73409 | 1148.291 | 11.5485  | 1148.491 | 11.53541 |
| 11.79106 | 1148.259 | 11.55857 | 1148.474 | 11.74    | 1148.288 | 11.55    | 1148.489 | 11.53841 |
| 11.79847 | 1148.257 | 11.56    | 1148.472 | 11.74409 | 1148.285 | 11.55106 | 1148.487 | 11.54    |
| 11.8     | 1148.255 | 11.56107 | 1148.47  | 11.75    | 1148.282 | 11.5585  | 1148.475 | 11.54343 |
| 11.80106 | 1148.255 | 11.56857 | 1148.459 | 11.75409 | 1148.279 | 11.56    | 1148.472 | 11.55    |
| 11.80847 | 1148.251 | 11.57    | 1148.457 | 11.76    | 1148.276 | 11.56106 | 1148.471 | 11.55343 |
| 11.81    | 1148.251 | 11.57107 | 1148.455 | 11.76409 | 1148.274 | 11.5685  | 1148.459 | 11.56    |
| 11.81106 | 1148.251 | 11.57857 | 1148.445 | 11.77    | 1148.271 | 11.57    | 1148.457 | 11.56343 |
| 11.81847 | 1148.249 | 11.58    | 1148.443 | 11.77409 | 1148.269 | 11.57195 | 1148.454 | 11.57    |
| 11.82    | 1148.248 | 11.58107 | 1148.441 | 11.78    | 1148.266 | 11.57849 | 1148.445 | 11.57343 |
| 11.82106 | 1148.247 | 11.58857 | 1148.431 | 11.78409 | 1148.265 | 11.58    | 1148.443 | 11.58    |
| 11.82847 | 1148.244 | 11.59    | 1148.429 | 11.79    | 1148.262 | 11.58747 | 1148.433 | 11.58343 |
| 11.83    | 1148.245 | 11.59107 | 1148.427 | 11.79409 | 1148.26  | 11.59    | 1148.429 | 11.59    |
| 11.83106 | 1148.245 | 11.59857 | 1148.418 | 11.8     | 1148.258 | 11.59747 | 1148.419 | 11.59343 |
| 11.83847 | 1148.245 | 11.6     | 1148.416 | 11.80409 | 1148.256 | 11.6     | 1148.416 | 11.6     |
| 11.84    | 1148.242 | 11.60107 | 1148.414 | 11.81    | 1148.254 | 11.60747 | 1148.406 | 11.60343 |
| 11.84106 | 1148.241 | 11.60857 | 1148.405 | 11.81409 | 1148.253 | 11.61    | 1148.403 | 11.61    |
| 11.84847 | 1148.237 | 11.61    | 1148.403 | 11.82    | 1148.251 | 11.61747 | 1148.394 | 11.61343 |
| 11.85    | 1148.239 | 11.61107 | 1148.402 | 11.82409 | 1148.249 | 11.62    | 1148.391 | 11.62    |
| 11.85106 | 1148.24  | 11.61857 | 1148.393 | 11.83    | 1148.247 | 11.62747 | 1148.382 | 11.62343 |
| 11.85847 | 1148.24  | 11.62    | 1148.391 | 11.83409 | 1148.246 | 11.63    | 1148.38  | 11.63    |
| 11.86    | 1148.237 | 11.62107 | 1148.39  | 11.84    | 1148.245 | 11.63747 | 1148.371 | 11.63343 |
| 11.86106 | 1148.236 | 11.62857 | 1148.381 | 11.84409 | 1148.243 | 11.64    | 1148.369 | 11.64    |
| 11.86847 | 1148.232 | 11.63    | 1148.38  | 11.85    | 1148.242 | 11.64747 | 1148.361 | 11.64343 |
| 11.87    | 1148.235 | 11.63107 | 1148.378 | 11.85409 | 1148.241 | 11.65    | 1148.358 | 11.65    |
| 11.87106 | 1148.236 | 11.63857 | 1148.37  | 11.86    | 1148.239 | 11.65747 | 1148.351 | 11.65343 |
| 11.87847 | 1148.238 | 11.64    | 1148.369 | 11.86409 | 1148.239 | 11.66    | 1148.348 | 11.66    |
| 11.88    | 1148.234 | 11.64107 | 1148.367 | 11.87    | 1148.237 | 11.66747 | 1148.341 | 11.66343 |
| 11.88106 | 1148.232 | 11.64857 | 1148.36  | 11.87409 | 1148.236 | 11.67    | 1148.339 | 11.66912 |
| 11.88847 | 1148.226 | 11.65    | 1148.358 | 11.88    | 1148.235 | 11.67747 | 1148.332 | 11.67093 |
| 11.89    | 1148.229 | 11.65107 | 1148.357 | 11.88409 | 1148.235 | 11.68    | 1148.33  | 11.67662 |
| 11.89106 | 1148.231 | 11.65857 | 1148.349 | 11.89    | 1148.234 | 11.68747 | 1148.323 | 11.68    |
| 11.89773 | 1148.23  | 11.66    | 1148.348 | 11.89409 | 1148.233 | 11.69    | 1148.321 | 11.6865  |
| 11.9     | 1148.23  | 11.66107 | 1148.347 | 11.9     | 1148.232 | 11.69747 | 1148.315 | 11.69    |
| 11.90762 | 1148.229 | 11.66857 | 1148.34  | 11.90409 | 1148.231 | 11.7     | 1148.313 | 11.6965  |
| 11.91    | 1148.229 | 11.67    | 1148.339 | 11.91    | 1148.231 | 11.70747 | 1148.308 | 11.7     |
| 11.91762 | 1148.228 | 11.67107 | 1148.338 | 11.91409 | 1148.23  | 11.71    | 1148.306 | 11.7065  |

|          |          |          |          |          |          |          |          |         |
|----------|----------|----------|----------|----------|----------|----------|----------|---------|
| 11.92    | 1148.228 | 11.67857 | 1148.331 | 11.92    | 1148.229 | 11.71747 | 1148.3   | 11.71   |
| 11.92762 | 1148.226 | 11.68    | 1148.33  | 11.92409 | 1148.229 | 11.72    | 1148.299 | 11.7165 |
| 11.93    | 1148.226 | 11.68107 | 1148.329 | 11.92946 | 1148.228 | 11.72747 | 1148.294 | 11.72   |
| 11.93762 | 1148.226 | 11.68857 | 1148.322 | 11.93077 | 1148.228 | 11.73    | 1148.292 | 11.7265 |
| 11.94    | 1148.226 | 11.69    | 1148.321 | 11.93614 | 1148.228 | 11.73747 | 1148.287 | 11.73   |
| 11.94762 | 1148.225 | 11.69107 | 1148.32  | 11.94    | 1148.227 | 11.74    | 1148.286 | 11.7365 |
| 11.95    | 1148.225 | 11.69857 | 1148.314 | 11.94614 | 1148.227 | 11.74747 | 1148.281 | 11.74   |
| 11.95762 | 1148.225 | 11.7     | 1148.313 | 11.95    | 1148.227 | 11.75    | 1148.28  | 11.7465 |
| 11.96    | 1148.224 | 11.70107 | 1148.312 | 11.95614 | 1148.226 | 11.75747 | 1148.276 | 11.75   |
| 11.96762 | 1148.224 | 11.70857 | 1148.307 | 11.96    | 1148.226 | 11.76    | 1148.275 | 11.7565 |
| 11.97    | 1148.224 | 11.71    | 1148.306 | 11.96614 | 1148.226 | 11.76747 | 1148.271 | 11.76   |
| 11.97762 | 1148.224 | 11.71107 | 1148.305 | 11.97    | 1148.226 | 11.77    | 1148.269 | 11.7665 |
| 11.98    | 1148.224 | 11.71857 | 1148.3   | 11.97614 | 1148.225 | 11.77747 | 1148.266 | 11.77   |
| 11.98762 | 1148.224 | 11.72    | 1148.299 | 11.98    | 1148.225 | 11.78    | 1148.265 | 11.7765 |
| 11.99    | 1148.224 | 11.72107 | 1148.298 | 11.98614 | 1148.225 | 11.78747 | 1148.261 | 11.78   |
| 11.99762 | 1148.223 | 11.72857 | 1148.293 | 11.99    | 1148.225 | 11.79    | 1148.26  | 11.7865 |
| 12       | 1148.224 | 11.73    | 1148.292 | 11.99614 | 1148.225 | 11.79747 | 1148.257 | 11.79   |
| 12.00762 | 1148.224 | 11.73107 | 1148.291 | 12       | 1148.225 | 11.8     | 1148.256 | 11.7965 |
| 12.01    | 1148.224 | 11.73857 | 1148.287 | 12.00614 | 1148.225 | 11.80747 | 1148.253 | 11.8    |
| 12.01762 | 1148.224 | 11.74    | 1148.286 | 12.01    | 1148.225 | 11.81    | 1148.253 | 11.8065 |
| 12.02    | 1148.224 | 11.74107 | 1148.285 | 12.01614 | 1148.225 | 11.81747 | 1148.25  | 11.81   |
| 12.02762 | 1148.224 | 11.74857 | 1148.281 | 12.02    | 1148.225 | 11.82    | 1148.249 | 11.8165 |
| 12.03    | 1148.224 | 11.75    | 1148.28  | 12.02614 | 1148.225 | 11.82747 | 1148.247 | 11.82   |
| 12.03762 | 1148.224 | 11.75107 | 1148.279 | 12.03    | 1148.226 | 11.83    | 1148.246 | 11.8265 |
| 12.04    | 1148.225 | 11.75857 | 1148.275 | 12.03614 | 1148.226 | 11.83747 | 1148.244 | 11.83   |
| 12.04762 | 1148.225 | 11.76    | 1148.274 | 12.04    | 1148.226 | 11.84    | 1148.243 | 11.8365 |
| 12.05    | 1148.225 | 11.76107 | 1148.274 | 12.04614 | 1148.226 | 11.84747 | 1148.241 | 11.84   |
| 12.05762 | 1148.226 | 11.76857 | 1148.27  | 12.05    | 1148.226 | 11.85    | 1148.24  | 11.8465 |
| 12.06    | 1148.226 | 11.77    | 1148.269 | 12.05614 | 1148.227 | 11.85747 | 1148.239 | 11.85   |
| 12.06762 | 1148.226 | 11.77107 | 1148.269 | 12.06    | 1148.227 | 11.86    | 1148.238 | 11.8565 |
| 12.07    | 1148.226 | 11.77857 | 1148.265 | 12.06614 | 1148.227 | 11.86747 | 1148.236 | 11.86   |
| 12.07762 | 1148.227 | 11.78    | 1148.265 | 12.07    | 1148.228 | 11.87    | 1148.236 | 11.8665 |
| 12.08    | 1148.227 | 11.78107 | 1148.264 | 12.07614 | 1148.228 | 11.87747 | 1148.234 | 11.87   |
| 12.08762 | 1148.228 | 11.78857 | 1148.261 | 12.08    | 1148.228 | 11.88    | 1148.234 | 11.8765 |
| 12.09    | 1148.228 | 11.79    | 1148.26  | 12.08614 | 1148.229 | 11.88747 | 1148.233 | 11.88   |
| 12.09762 | 1148.229 | 11.79107 | 1148.26  | 12.09    | 1148.229 | 11.89    | 1148.232 | 11.8865 |
| 12.1     | 1148.229 | 11.79857 | 1148.257 | 12.09614 | 1148.23  | 11.89747 | 1148.231 | 11.89   |
| 12.10762 | 1148.23  | 11.8     | 1148.256 | 12.1     | 1148.23  | 11.9     | 1148.231 | 11.8965 |
| 12.11    | 1148.23  | 11.80107 | 1148.256 | 12.10614 | 1148.23  | 11.90747 | 1148.23  | 11.9    |
| 12.11762 | 1148.231 | 11.80857 | 1148.253 | 12.11    | 1148.231 | 11.91    | 1148.229 | 11.9065 |
| 12.12    | 1148.231 | 11.81    | 1148.253 | 12.11614 | 1148.231 | 11.91747 | 1148.228 | 11.91   |
| 12.12762 | 1148.232 | 11.81107 | 1148.252 | 12.12    | 1148.232 | 11.92    | 1148.228 | 11.9165 |
| 12.13    | 1148.232 | 11.81857 | 1148.25  | 12.12614 | 1148.232 | 11.92747 | 1148.227 | 11.92   |
| 12.13762 | 1148.233 | 11.82    | 1148.249 | 12.13    | 1148.233 | 11.93    | 1148.227 | 11.9265 |
| 12.14    | 1148.233 | 11.82107 | 1148.249 | 12.13614 | 1148.234 | 11.93747 | 1148.226 | 11.93   |
| 12.14762 | 1148.234 | 11.82857 | 1148.246 | 12.14    | 1148.234 | 11.94    | 1148.226 | 11.9365 |
| 12.15    | 1148.234 | 11.83    | 1148.246 | 12.14614 | 1148.235 | 11.94747 | 1148.226 | 11.94   |

|          |          |          |          |          |          |          |          |         |
|----------|----------|----------|----------|----------|----------|----------|----------|---------|
| 12.15762 | 1148.235 | 11.83107 | 1148.246 | 12.15    | 1148.235 | 11.95    | 1148.226 | 11.9465 |
| 12.16    | 1148.236 | 11.83857 | 1148.243 | 12.15614 | 1148.236 | 11.95747 | 1148.225 | 11.95   |
| 12.16762 | 1148.237 | 11.84    | 1148.243 | 12.16    | 1148.236 | 11.96    | 1148.225 | 11.9565 |
| 12.17    | 1148.237 | 11.84107 | 1148.243 | 12.16614 | 1148.237 | 11.96747 | 1148.225 | 11.96   |
| 12.17762 | 1148.238 | 11.84857 | 1148.241 | 12.17    | 1148.238 | 11.97    | 1148.225 | 11.9665 |
| 12.18    | 1148.238 | 11.85    | 1148.24  | 12.17614 | 1148.238 | 11.97747 | 1148.224 | 11.97   |
| 12.18762 | 1148.239 | 11.85107 | 1148.24  | 12.18    | 1148.239 | 11.98    | 1148.224 | 11.9765 |
| 12.19    | 1148.24  | 11.85857 | 1148.238 | 12.18614 | 1148.24  | 11.98747 | 1148.224 | 11.98   |
| 12.19762 | 1148.241 | 11.86    | 1148.238 | 12.19    | 1148.24  | 11.99    | 1148.224 | 11.9865 |
| 12.2     | 1148.241 | 11.86107 | 1148.238 | 12.19614 | 1148.241 | 11.99747 | 1148.224 | 11.99   |
| 12.20762 | 1148.242 | 11.86857 | 1148.236 | 12.2     | 1148.242 | 12       | 1148.224 | 11.9965 |
| 12.21    | 1148.242 | 11.87    | 1148.236 | 12.20614 | 1148.242 | 12.00747 | 1148.224 | 12      |
| 12.21762 | 1148.243 | 11.87107 | 1148.236 | 12.21    | 1148.243 | 12.01    | 1148.224 | 12.0065 |
| 12.22    | 1148.244 | 11.87857 | 1148.234 | 12.21614 | 1148.244 | 12.01747 | 1148.224 | 12.01   |
| 12.22762 | 1148.245 | 11.88    | 1148.234 | 12.22    | 1148.244 | 12.02    | 1148.224 | 12.0165 |
| 12.23    | 1148.245 | 11.88107 | 1148.234 | 12.22614 | 1148.245 | 12.02747 | 1148.225 | 12.02   |
| 12.23762 | 1148.246 | 11.88857 | 1148.232 | 12.23    | 1148.246 | 12.03    | 1148.225 | 12.0265 |
| 12.24    | 1148.247 | 11.89    | 1148.232 | 12.23614 | 1148.247 | 12.03747 | 1148.225 | 12.03   |
| 12.24762 | 1148.248 | 11.89107 | 1148.232 | 12.24    | 1148.247 | 12.04    | 1148.225 | 12.0365 |
| 12.25    | 1148.248 | 11.89857 | 1148.231 | 12.24614 | 1148.248 | 12.04747 | 1148.226 | 12.04   |
| 12.25762 | 1148.249 | 11.9     | 1148.231 | 12.25    | 1148.249 | 12.05    | 1148.226 | 12.0465 |
| 12.26    | 1148.25  | 11.90107 | 1148.231 | 12.25614 | 1148.25  | 12.05747 | 1148.226 | 12.05   |
| 12.26762 | 1148.251 | 11.90857 | 1148.23  | 12.26    | 1148.25  | 12.06    | 1148.226 | 12.0565 |
| 12.27    | 1148.251 | 11.91    | 1148.229 | 12.26614 | 1148.251 | 12.06747 | 1148.227 | 12.06   |
| 12.27762 | 1148.253 | 11.91107 | 1148.229 | 12.27    | 1148.252 | 12.07    | 1148.227 | 12.0665 |
| 12.28    | 1148.253 | 11.91857 | 1148.228 | 12.27614 | 1148.253 | 12.07747 | 1148.227 | 12.07   |
| 12.28762 | 1148.254 | 11.92    | 1148.228 | 12.28    | 1148.253 | 12.08    | 1148.228 | 12.0765 |
| 12.29    | 1148.255 | 11.92107 | 1148.228 | 12.28614 | 1148.254 | 12.08747 | 1148.228 | 12.08   |
| 12.29762 | 1148.256 | 11.92857 | 1148.227 | 12.29    | 1148.255 | 12.09    | 1148.228 | 12.0865 |
| 12.3     | 1148.256 | 11.93    | 1148.227 | 12.29614 | 1148.256 | 12.09747 | 1148.229 | 12.09   |
| 12.30762 | 1148.257 | 11.93107 | 1148.227 | 12.3     | 1148.257 | 12.1     | 1148.229 | 12.0965 |
| 12.31    | 1148.258 | 11.93857 | 1148.226 | 12.30614 | 1148.257 | 12.10747 | 1148.23  | 12.1    |
| 12.31762 | 1148.259 | 11.94    | 1148.226 | 12.31    | 1148.258 | 12.11    | 1148.23  | 12.1065 |
| 12.32    | 1148.259 | 11.94107 | 1148.226 | 12.31614 | 1148.259 | 12.11747 | 1148.231 | 12.11   |
| 12.32762 | 1148.261 | 11.94857 | 1148.226 | 12.32    | 1148.26  | 12.12    | 1148.231 | 12.1165 |
| 12.33    | 1148.261 | 11.95    | 1148.226 | 12.32614 | 1148.261 | 12.12747 | 1148.232 | 12.12   |
| 12.33762 | 1148.262 | 11.95107 | 1148.226 | 12.33    | 1148.261 | 12.13    | 1148.232 | 12.1265 |
| 12.34    | 1148.263 | 11.95857 | 1148.225 | 12.33614 | 1148.262 | 12.13747 | 1148.233 | 12.13   |
| 12.34762 | 1148.264 | 11.96    | 1148.225 | 12.34    | 1148.263 | 12.14    | 1148.234 | 12.1365 |
| 12.35    | 1148.264 | 11.96107 | 1148.225 | 12.34614 | 1148.264 | 12.14747 | 1148.234 | 12.14   |
| 12.35762 | 1148.266 | 11.96857 | 1148.225 | 12.35    | 1148.265 | 12.15    | 1148.235 | 12.1465 |
| 12.36    | 1148.266 | 11.97    | 1148.225 | 12.35614 | 1148.266 | 12.15747 | 1148.236 | 12.15   |
| 12.36762 | 1148.267 | 11.97107 | 1148.225 | 12.36    | 1148.266 | 12.16    | 1148.236 | 12.1565 |
| 12.37    | 1148.268 | 11.97857 | 1148.224 | 12.36614 | 1148.267 | 12.16747 | 1148.237 | 12.16   |
| 12.37762 | 1148.269 | 11.98    | 1148.224 | 12.37    | 1148.268 | 12.17    | 1148.237 | 12.1665 |
| 12.38    | 1148.269 | 11.98107 | 1148.224 | 12.37614 | 1148.269 | 12.17747 | 1148.238 | 12.17   |
| 12.38762 | 1148.271 | 11.98857 | 1148.224 | 12.38    | 1148.269 | 12.18    | 1148.238 | 12.1765 |

|          |          |          |          |          |          |          |          |         |
|----------|----------|----------|----------|----------|----------|----------|----------|---------|
| 12.39    | 1148.271 | 11.99    | 1148.224 | 12.38614 | 1148.27  | 12.18747 | 1148.239 | 12.18   |
| 12.39762 | 1148.272 | 11.99107 | 1148.224 | 12.39    | 1148.271 | 12.19    | 1148.24  | 12.1865 |
| 12.4     | 1148.273 | 11.99857 | 1148.224 | 12.39614 | 1148.272 | 12.19747 | 1148.241 | 12.19   |
| 12.40762 | 1148.274 | 12       | 1148.224 | 12.4     | 1148.273 | 12.2     | 1148.241 | 12.1965 |
| 12.41    | 1148.274 | 12.00107 | 1148.224 | 12.40614 | 1148.274 | 12.20747 | 1148.242 | 12.2    |
| 12.41762 | 1148.276 | 12.00857 | 1148.224 | 12.41    | 1148.274 | 12.21    | 1148.243 | 12.2065 |
| 12.42    | 1148.276 | 12.01    | 1148.224 | 12.41614 | 1148.275 | 12.21747 | 1148.244 | 12.21   |
| 12.42762 | 1148.277 | 12.01107 | 1148.224 | 12.42    | 1148.276 | 12.22    | 1148.244 | 12.2165 |
| 12.43    | 1148.278 | 12.01857 | 1148.225 | 12.42614 | 1148.277 | 12.22747 | 1148.245 | 12.22   |
| 12.43762 | 1148.279 | 12.02    | 1148.225 | 12.43    | 1148.278 | 12.23    | 1148.246 | 12.2265 |
| 12.44    | 1148.279 | 12.02107 | 1148.225 | 12.43614 | 1148.279 | 12.23747 | 1148.247 | 12.23   |
| 12.44762 | 1148.28  | 12.02857 | 1148.225 | 12.44    | 1148.279 | 12.24    | 1148.247 | 12.2365 |
| 12.45    | 1148.281 | 12.03    | 1148.225 | 12.44614 | 1148.28  | 12.24747 | 1148.248 | 12.24   |
| 12.45762 | 1148.282 | 12.03107 | 1148.225 | 12.45    | 1148.281 | 12.25    | 1148.249 | 12.2465 |
| 12.46    | 1148.282 | 12.03857 | 1148.225 | 12.45614 | 1148.282 | 12.25747 | 1148.25  | 12.25   |
| 12.46762 | 1148.284 | 12.04    | 1148.225 | 12.46    | 1148.283 | 12.26    | 1148.25  | 12.2565 |
| 12.47    | 1148.284 | 12.04107 | 1148.225 | 12.46614 | 1148.284 | 12.26747 | 1148.251 | 12.26   |
| 12.47762 | 1148.285 | 12.04857 | 1148.226 | 12.47    | 1148.284 | 12.27    | 1148.252 | 12.2665 |
| 12.48    | 1148.286 | 12.05    | 1148.226 | 12.47614 | 1148.285 | 12.27747 | 1148.253 | 12.27   |
| 12.48762 | 1148.287 | 12.05107 | 1148.226 | 12.48    | 1148.286 | 12.28    | 1148.253 | 12.2765 |
| 12.49    | 1148.287 | 12.05857 | 1148.227 | 12.48614 | 1148.287 | 12.28747 | 1148.254 | 12.28   |
| 12.49762 | 1148.289 | 12.06    | 1148.226 | 12.49    | 1148.287 | 12.29    | 1148.255 | 12.2865 |
| 12.5     | 1148.289 | 12.06107 | 1148.226 | 12.49614 | 1148.288 | 12.29747 | 1148.256 | 12.29   |
| 12.50762 | 1148.29  | 12.06857 | 1148.227 | 12.5     | 1148.289 | 12.3     | 1148.256 | 12.2965 |
| 12.51    | 1148.291 | 12.07    | 1148.227 | 12.50614 | 1148.29  | 12.30747 | 1148.258 | 12.3    |
| 12.51762 | 1148.292 | 12.07107 | 1148.227 | 12.51    | 1148.291 | 12.31    | 1148.258 | 12.3065 |
| 12.52    | 1148.292 | 12.07857 | 1148.228 | 12.51614 | 1148.291 | 12.31747 | 1148.259 | 12.31   |
| 12.52762 | 1148.293 | 12.08    | 1148.228 | 12.52    | 1148.292 | 12.32    | 1148.26  | 12.3165 |
| 12.53    | 1148.294 | 12.08107 | 1148.228 | 12.52614 | 1148.293 | 12.32747 | 1148.261 | 12.32   |
| 12.53762 | 1148.295 | 12.08857 | 1148.228 | 12.53    | 1148.294 | 12.33    | 1148.261 | 12.3265 |
| 12.54    | 1148.295 | 12.09    | 1148.228 | 12.53614 | 1148.295 | 12.33747 | 1148.262 | 12.33   |
| 12.54762 | 1148.296 | 12.09107 | 1148.229 | 12.54    | 1148.295 | 12.34    | 1148.263 | 12.3365 |
| 12.55    | 1148.297 | 12.09857 | 1148.23  | 12.54614 | 1148.296 | 12.34747 | 1148.264 | 12.34   |
| 12.55762 | 1148.298 | 12.1     | 1148.23  | 12.55    | 1148.297 | 12.35    | 1148.265 | 12.3465 |
| 12.56    | 1148.298 | 12.10107 | 1148.23  | 12.55614 | 1148.298 | 12.35747 | 1148.266 | 12.35   |
| 12.56762 | 1148.299 | 12.10782 | 1148.23  | 12.56    | 1148.298 | 12.36    | 1148.266 | 12.3565 |
| 12.57    | 1148.3   | 12.11    | 1148.23  | 12.56614 | 1148.299 | 12.36747 | 1148.267 | 12.36   |
| 12.57762 | 1148.301 | 12.11771 | 1148.231 | 12.57    | 1148.3   | 12.37    | 1148.268 | 12.3665 |
| 12.58    | 1148.301 | 12.12    | 1148.232 | 12.57614 | 1148.301 | 12.37747 | 1148.269 | 12.37   |
| 12.58762 | 1148.302 | 12.12771 | 1148.232 | 12.58    | 1148.301 | 12.38    | 1148.269 | 12.3765 |
| 12.59    | 1148.303 | 12.13    | 1148.233 | 12.58614 | 1148.302 | 12.38747 | 1148.271 | 12.38   |
| 12.59762 | 1148.304 | 12.13771 | 1148.234 | 12.59    | 1148.303 | 12.39    | 1148.271 | 12.3865 |
| 12.6     | 1148.304 | 12.14    | 1148.234 | 12.59614 | 1148.304 | 12.39747 | 1148.272 | 12.39   |
| 12.60762 | 1148.305 | 12.14771 | 1148.235 | 12.6     | 1148.304 | 12.4     | 1148.273 | 12.3965 |
| 12.61    | 1148.306 | 12.15    | 1148.235 | 12.60614 | 1148.305 | 12.40747 | 1148.274 | 12.4    |
| 12.61762 | 1148.307 | 12.15771 | 1148.236 | 12.61    | 1148.306 | 12.41    | 1148.274 | 12.4065 |
| 12.62    | 1148.307 | 12.16    | 1148.236 | 12.61614 | 1148.307 | 12.41747 | 1148.276 | 12.41   |

|          |          |          |          |          |          |          |          |         |
|----------|----------|----------|----------|----------|----------|----------|----------|---------|
| 12.62762 | 1148.308 | 12.16771 | 1148.237 | 12.62    | 1148.307 | 12.42    | 1148.276 | 12.4165 |
| 12.63    | 1148.309 | 12.17    | 1148.237 | 12.62614 | 1148.308 | 12.42747 | 1148.277 | 12.42   |
| 12.63762 | 1148.31  | 12.17771 | 1148.238 | 12.63    | 1148.309 | 12.43    | 1148.278 | 12.4265 |
| 12.64    | 1148.31  | 12.18    | 1148.239 | 12.63614 | 1148.309 | 12.43747 | 1148.279 | 12.43   |
| 12.64762 | 1148.311 | 12.18771 | 1148.24  | 12.64    | 1148.31  | 12.44    | 1148.279 | 12.4365 |
| 12.65    | 1148.312 | 12.19    | 1148.24  | 12.64614 | 1148.311 | 12.44747 | 1148.281 | 12.44   |
| 12.65762 | 1148.313 | 12.19771 | 1148.241 | 12.65    | 1148.311 | 12.45    | 1148.281 | 12.4465 |
| 12.66    | 1148.313 | 12.2     | 1148.241 | 12.65614 | 1148.312 | 12.45747 | 1148.282 | 12.45   |
| 12.66762 | 1148.314 | 12.20771 | 1148.243 | 12.66    | 1148.313 | 12.46    | 1148.283 | 12.4565 |
| 12.67    | 1148.314 | 12.21    | 1148.243 | 12.66614 | 1148.314 | 12.46747 | 1148.284 | 12.46   |
| 12.67762 | 1148.315 | 12.21771 | 1148.244 | 12.67    | 1148.314 | 12.47    | 1148.284 | 12.4665 |
| 12.68    | 1148.316 | 12.22    | 1148.244 | 12.67614 | 1148.315 | 12.47747 | 1148.285 | 12.47   |
| 12.68762 | 1148.317 | 12.22771 | 1148.245 | 12.68    | 1148.316 | 12.48    | 1148.286 | 12.4765 |
| 12.69    | 1148.317 | 12.23    | 1148.246 | 12.68614 | 1148.316 | 12.48747 | 1148.287 | 12.48   |
| 12.69762 | 1148.318 | 12.23771 | 1148.247 | 12.69    | 1148.317 | 12.49    | 1148.287 | 12.4865 |
| 12.7     | 1148.318 | 12.24    | 1148.247 | 12.69614 | 1148.318 | 12.49747 | 1148.289 | 12.49   |
| 12.70762 | 1148.319 | 12.24771 | 1148.248 | 12.7     | 1148.318 | 12.5     | 1148.289 | 12.4965 |
| 12.71    | 1148.32  | 12.25    | 1148.249 | 12.70614 | 1148.319 | 12.50747 | 1148.29  | 12.5    |
| 12.71762 | 1148.321 | 12.25771 | 1148.25  | 12.71    | 1148.32  | 12.51    | 1148.291 | 12.5065 |
| 12.72    | 1148.321 | 12.26    | 1148.25  | 12.71614 | 1148.32  | 12.51747 | 1148.292 | 12.51   |
| 12.72762 | 1148.322 | 12.26771 | 1148.252 | 12.72    | 1148.321 | 12.52    | 1148.292 | 12.5165 |
| 12.73    | 1148.322 | 12.27    | 1148.252 | 12.72614 | 1148.322 | 12.52747 | 1148.293 | 12.52   |
| 12.73762 | 1148.323 | 12.27771 | 1148.253 | 12.73    | 1148.322 | 12.53    | 1148.294 | 12.5265 |
| 12.74    | 1148.324 | 12.28    | 1148.253 | 12.73614 | 1148.323 | 12.53747 | 1148.295 | 12.53   |
| 12.74762 | 1148.325 | 12.28771 | 1148.255 | 12.74    | 1148.323 | 12.54    | 1148.295 | 12.5365 |
| 12.75    | 1148.325 | 12.29    | 1148.255 | 12.74614 | 1148.324 | 12.54747 | 1148.296 | 12.54   |
| 12.75762 | 1148.326 | 12.29771 | 1148.256 | 12.75    | 1148.325 | 12.55    | 1148.297 | 12.5465 |
| 12.76    | 1148.326 | 12.3     | 1148.257 | 12.75614 | 1148.325 | 12.55747 | 1148.298 | 12.55   |
| 12.76762 | 1148.327 | 12.30771 | 1148.258 | 12.76    | 1148.326 | 12.56    | 1148.298 | 12.5565 |
| 12.77    | 1148.327 | 12.31    | 1148.258 | 12.76614 | 1148.327 | 12.56747 | 1148.299 | 12.56   |
| 12.77762 | 1148.328 | 12.31771 | 1148.259 | 12.77    | 1148.327 | 12.57    | 1148.3   | 12.5665 |
| 12.78    | 1148.329 | 12.32    | 1148.26  | 12.77614 | 1148.328 | 12.57747 | 1148.301 | 12.57   |
| 12.78762 | 1148.329 | 12.32771 | 1148.261 | 12.78    | 1148.328 | 12.58    | 1148.301 | 12.5765 |
| 12.79    | 1148.33  | 12.33    | 1148.262 | 12.78614 | 1148.329 | 12.58747 | 1148.302 | 12.58   |
| 12.79762 | 1148.331 | 12.33771 | 1148.263 | 12.79    | 1148.33  | 12.59    | 1148.303 | 12.5865 |
| 12.8     | 1148.331 | 12.34    | 1148.263 | 12.79614 | 1148.33  | 12.59747 | 1148.304 | 12.59   |
| 12.80762 | 1148.332 | 12.34771 | 1148.264 | 12.8     | 1148.331 | 12.6     | 1148.304 | 12.5965 |
| 12.81    | 1148.332 | 12.35    | 1148.265 | 12.80614 | 1148.332 | 12.60747 | 1148.305 | 12.6    |
| 12.81762 | 1148.333 | 12.35771 | 1148.266 | 12.81    | 1148.332 | 12.61    | 1148.306 | 12.6065 |
| 12.82    | 1148.333 | 12.36    | 1148.266 | 12.81614 | 1148.333 | 12.61747 | 1148.307 | 12.61   |
| 12.82762 | 1148.334 | 12.36771 | 1148.268 | 12.82    | 1148.333 | 12.62    | 1148.307 | 12.6165 |
| 12.83    | 1148.334 | 12.37    | 1148.268 | 12.82614 | 1148.334 | 12.62747 | 1148.308 | 12.62   |
| 12.83762 | 1148.335 | 12.37771 | 1148.269 | 12.83    | 1148.334 | 12.63    | 1148.309 | 12.6265 |
| 12.84    | 1148.336 | 12.38    | 1148.27  | 12.83614 | 1148.335 | 12.63747 | 1148.31  | 12.63   |
| 12.84762 | 1148.336 | 12.38771 | 1148.271 | 12.84    | 1148.335 | 12.64    | 1148.31  | 12.6365 |
| 12.85    | 1148.337 | 12.39    | 1148.271 | 12.84614 | 1148.336 | 12.64747 | 1148.311 | 12.64   |
| 12.85762 | 1148.337 | 12.39771 | 1148.273 | 12.85    | 1148.336 | 12.65    | 1148.312 | 12.6465 |

|          |          |          |          |          |          |          |          |         |
|----------|----------|----------|----------|----------|----------|----------|----------|---------|
| 12.86    | 1148.338 | 12.4     | 1148.273 | 12.85614 | 1148.337 | 12.65747 | 1148.313 | 12.65   |
| 12.86762 | 1148.339 | 12.40771 | 1148.274 | 12.86    | 1148.338 | 12.66    | 1148.313 | 12.6565 |
| 12.87    | 1148.339 | 12.41    | 1148.275 | 12.86614 | 1148.338 | 12.66747 | 1148.314 | 12.66   |
| 12.87762 | 1148.34  | 12.41771 | 1148.276 | 12.87    | 1148.339 | 12.67    | 1148.314 | 12.6665 |
| 12.88    | 1148.34  | 12.42    | 1148.276 | 12.87614 | 1148.339 | 12.67747 | 1148.315 | 12.67   |
| 12.88762 | 1148.341 | 12.42771 | 1148.278 | 12.88    | 1148.34  | 12.68    | 1148.316 | 12.6765 |
| 12.89    | 1148.341 | 12.43    | 1148.278 | 12.88614 | 1148.34  | 12.68747 | 1148.317 | 12.68   |
| 12.89762 | 1148.342 | 12.43771 | 1148.279 | 12.89    | 1148.341 | 12.69    | 1148.317 | 12.6865 |
| 12.9     | 1148.342 | 12.44    | 1148.28  | 12.89614 | 1148.341 | 12.69747 | 1148.318 | 12.69   |
| 12.90762 | 1148.343 | 12.44771 | 1148.281 | 12.9     | 1148.342 | 12.7     | 1148.318 | 12.6965 |
| 12.91    | 1148.343 | 12.45    | 1148.281 | 12.90614 | 1148.342 | 12.70747 | 1148.319 | 12.7    |
| 12.91762 | 1148.344 | 12.45771 | 1148.282 | 12.91    | 1148.343 | 12.71    | 1148.32  | 12.7065 |
| 12.92    | 1148.344 | 12.46    | 1148.283 | 12.91614 | 1148.343 | 12.71747 | 1148.321 | 12.71   |
| 12.92762 | 1148.345 | 12.46771 | 1148.284 | 12.92    | 1148.344 | 12.72    | 1148.321 | 12.7165 |
| 12.93    | 1148.345 | 12.47    | 1148.284 | 12.92614 | 1148.344 | 12.72747 | 1148.322 | 12.72   |
| 12.93762 | 1148.346 | 12.47771 | 1148.286 | 12.93    | 1148.345 | 12.73    | 1148.322 | 12.7265 |
| 12.94    | 1148.346 | 12.48    | 1148.286 | 12.93614 | 1148.345 | 12.73747 | 1148.323 | 12.73   |
| 12.94762 | 1148.347 | 12.48771 | 1148.287 | 12.94    | 1148.346 | 12.74    | 1148.324 | 12.7365 |
| 12.95    | 1148.347 | 12.49    | 1148.288 | 12.94614 | 1148.346 | 12.74747 | 1148.325 | 12.74   |
| 12.95762 | 1148.348 | 12.49771 | 1148.289 | 12.95    | 1148.347 | 12.75    | 1148.325 | 12.7465 |
| 12.96    | 1148.348 | 12.5     | 1148.289 | 12.95614 | 1148.347 | 12.75747 | 1148.326 | 12.75   |
| 12.96762 | 1148.349 | 12.50771 | 1148.29  | 12.96    | 1148.348 | 12.76    | 1148.326 | 12.7565 |
| 12.97    | 1148.349 | 12.51    | 1148.291 | 12.96614 | 1148.348 | 12.76747 | 1148.327 | 12.76   |
| 12.97762 | 1148.35  | 12.51771 | 1148.292 | 12.97    | 1148.349 | 12.77    | 1148.327 | 12.7665 |
| 12.98    | 1148.35  | 12.52    | 1148.292 | 12.97614 | 1148.349 | 12.77747 | 1148.328 | 12.77   |
| 12.98762 | 1148.35  | 12.52771 | 1148.294 | 12.98    | 1148.35  | 12.78    | 1148.329 | 12.7765 |
| 12.99    | 1148.351 | 12.53    | 1148.294 | 12.98614 | 1148.35  | 12.78747 | 1148.329 | 12.78   |
| 12.99762 | 1148.351 | 12.53771 | 1148.295 | 12.99    | 1148.351 | 12.79    | 1148.33  | 12.7865 |
| 13       | 1148.352 | 12.54    | 1148.296 | 12.99614 | 1148.351 | 12.79747 | 1148.331 | 12.79   |
| 13.00762 | 1148.352 | 12.54771 | 1148.297 | 13       | 1148.351 | 12.8     | 1148.331 | 12.7965 |
| 13.01    | 1148.352 | 12.55    | 1148.297 | 13.00614 | 1148.352 | 12.80747 | 1148.332 | 12.8    |
| 13.01762 | 1148.353 | 12.55771 | 1148.298 | 13.01    | 1148.352 | 12.81    | 1148.332 | 12.8065 |
| 13.02    | 1148.353 | 12.56    | 1148.299 | 13.01614 | 1148.353 | 12.81747 | 1148.333 | 12.81   |
| 13.02762 | 1148.354 | 12.56771 | 1148.3   | 13.02    | 1148.353 | 12.82    | 1148.333 | 12.8165 |
| 13.03    | 1148.354 | 12.57    | 1148.3   | 13.02614 | 1148.354 | 12.82747 | 1148.334 | 12.82   |
| 13.03762 | 1148.355 | 12.57771 | 1148.301 | 13.03    | 1148.354 | 12.83    | 1148.334 | 12.8265 |
| 13.04    | 1148.355 | 12.58    | 1148.302 | 13.03614 | 1148.355 | 12.83747 | 1148.335 | 12.83   |
| 13.04762 | 1148.356 | 12.58771 | 1148.303 | 13.04    | 1148.355 | 12.84    | 1148.336 | 12.8365 |
| 13.05    | 1148.356 | 12.59    | 1148.303 | 13.04614 | 1148.355 | 12.84747 | 1148.336 | 12.84   |
| 13.05762 | 1148.356 | 12.59771 | 1148.304 | 13.05    | 1148.356 | 12.85    | 1148.337 | 12.8465 |
| 13.06    | 1148.357 | 12.6     | 1148.305 | 13.05614 | 1148.356 | 12.85747 | 1148.337 | 12.85   |
| 13.06762 | 1148.357 | 12.60771 | 1148.306 | 13.06    | 1148.357 | 12.86    | 1148.338 | 12.8565 |
| 13.07    | 1148.357 | 12.61    | 1148.306 | 13.06614 | 1148.357 | 12.86747 | 1148.339 | 12.86   |
| 13.07762 | 1148.358 | 12.61771 | 1148.307 | 13.07    | 1148.357 | 12.87    | 1148.339 | 12.8665 |
| 13.08    | 1148.358 | 12.62    | 1148.307 | 13.07614 | 1148.358 | 12.87747 | 1148.34  | 12.87   |
| 13.08762 | 1148.359 | 12.62771 | 1148.309 | 13.08    | 1148.358 | 12.88    | 1148.34  | 12.8765 |
| 13.09    | 1148.359 | 12.63    | 1148.309 | 13.08614 | 1148.359 | 12.88747 | 1148.341 | 12.88   |

|          |          |          |          |          |          |          |          |         |
|----------|----------|----------|----------|----------|----------|----------|----------|---------|
| 13.09762 | 1148.36  | 12.63771 | 1148.31  | 13.09    | 1148.359 | 12.89    | 1148.341 | 12.8865 |
| 13.1     | 1148.36  | 12.64    | 1148.31  | 13.09614 | 1148.359 | 12.89747 | 1148.342 | 12.89   |
| 13.10762 | 1148.36  | 12.64771 | 1148.311 | 13.1     | 1148.36  | 12.9     | 1148.342 | 12.8965 |
| 13.11    | 1148.361 | 12.65    | 1148.312 | 13.10614 | 1148.36  | 12.90747 | 1148.343 | 12.9    |
| 13.11762 | 1148.361 | 12.65771 | 1148.313 | 13.11    | 1148.36  | 12.91    | 1148.343 | 12.9065 |
| 13.12    | 1148.361 | 12.66    | 1148.313 | 13.11614 | 1148.361 | 12.91747 | 1148.344 | 12.91   |
| 13.12762 | 1148.362 | 12.66771 | 1148.314 | 13.12    | 1148.361 | 12.92    | 1148.344 | 12.9165 |
| 13.13    | 1148.362 | 12.67    | 1148.315 | 13.12614 | 1148.362 | 12.92747 | 1148.345 | 12.92   |
| 13.13762 | 1148.363 | 12.67771 | 1148.316 | 13.13    | 1148.362 | 12.93    | 1148.345 | 12.9265 |
| 13.14    | 1148.363 | 12.68    | 1148.316 | 13.13614 | 1148.362 | 12.93747 | 1148.346 | 12.93   |
| 13.14762 | 1148.363 | 12.68771 | 1148.317 | 13.14    | 1148.363 | 12.94    | 1148.346 | 12.9365 |
| 13.15    | 1148.363 | 12.69    | 1148.317 | 13.14614 | 1148.363 | 12.94747 | 1148.347 | 12.94   |
| 13.15762 | 1148.364 | 12.69771 | 1148.318 | 13.15    | 1148.363 | 12.95    | 1148.347 | 12.9465 |
| 13.16    | 1148.364 | 12.7     | 1148.319 | 13.15614 | 1148.364 | 12.95747 | 1148.348 | 12.95   |
| 13.16762 | 1148.365 | 12.70771 | 1148.32  | 13.16    | 1148.364 | 12.96    | 1148.348 | 12.9565 |
| 13.17    | 1148.365 | 12.71    | 1148.32  | 13.16614 | 1148.364 | 12.96747 | 1148.349 | 12.96   |
| 13.17762 | 1148.365 | 12.71771 | 1148.321 | 13.17    | 1148.365 | 12.97    | 1148.349 | 12.9665 |
| 13.18    | 1148.366 | 12.72    | 1148.321 | 13.17614 | 1148.365 | 12.97747 | 1148.35  | 12.97   |
| 13.18762 | 1148.366 | 12.72771 | 1148.322 | 13.18    | 1148.365 | 12.98    | 1148.35  | 12.9765 |
| 13.19    | 1148.366 | 12.73    | 1148.323 | 13.18614 | 1148.366 | 12.98747 | 1148.35  | 12.98   |
| 13.19762 | 1148.367 | 12.73771 | 1148.323 | 13.19    | 1148.366 | 12.99    | 1148.351 | 12.9865 |
| 13.2     | 1148.367 | 12.74    | 1148.324 | 13.19614 | 1148.366 | 12.99747 | 1148.351 | 12.99   |
| 13.20762 | 1148.367 | 12.74771 | 1148.325 | 13.2     | 1148.367 | 13       | 1148.352 | 12.9965 |
| 13.21    | 1148.367 | 12.75    | 1148.325 | 13.20614 | 1148.367 | 13.00747 | 1148.352 | 13      |
| 13.21762 | 1148.368 | 12.75771 | 1148.326 | 13.21    | 1148.367 | 13.01    | 1148.352 | 13.0065 |
| 13.22    | 1148.368 | 12.76    | 1148.326 | 13.21614 | 1148.368 | 13.01747 | 1148.353 | 13.01   |
| 13.22762 | 1148.369 | 12.76771 | 1148.327 | 13.22    | 1148.368 | 13.02    | 1148.353 | 13.0165 |
| 13.23    | 1148.369 | 12.77    | 1148.328 | 13.22614 | 1148.368 | 13.02747 | 1148.354 | 13.02   |
| 13.23762 | 1148.369 | 12.77771 | 1148.328 | 13.23    | 1148.369 | 13.03    | 1148.354 | 13.0265 |
| 13.24    | 1148.369 | 12.78    | 1148.329 | 13.23614 | 1148.369 | 13.03747 | 1148.355 | 13.03   |
| 13.24762 | 1148.37  | 12.78771 | 1148.33  | 13.24    | 1148.369 | 13.04    | 1148.355 | 13.0365 |
| 13.25    | 1148.37  | 12.79    | 1148.33  | 13.24614 | 1148.37  | 13.04747 | 1148.356 | 13.04   |
| 13.25762 | 1148.37  | 12.79771 | 1148.331 | 13.25    | 1148.37  | 13.05    | 1148.356 | 13.0465 |
| 13.26    | 1148.371 | 12.8     | 1148.331 | 13.25614 | 1148.37  | 13.05747 | 1148.356 | 13.05   |
| 13.26762 | 1148.371 | 12.80771 | 1148.332 | 13.26    | 1148.37  | 13.06    | 1148.357 | 13.0565 |
| 13.27    | 1148.371 | 12.81    | 1148.332 | 13.26614 | 1148.371 | 13.06747 | 1148.357 | 13.06   |
| 13.27762 | 1148.372 | 12.81771 | 1148.333 | 13.27    | 1148.371 | 13.07    | 1148.357 | 13.0665 |
| 13.28    | 1148.372 | 12.82    | 1148.333 | 13.27614 | 1148.371 | 13.07747 | 1148.358 | 13.07   |
| 13.28762 | 1148.372 | 12.82771 | 1148.334 | 13.28    | 1148.372 | 13.08    | 1148.358 | 13.0765 |
| 13.29    | 1148.372 | 12.83    | 1148.335 | 13.28614 | 1148.372 | 13.08747 | 1148.359 | 13.08   |
| 13.29762 | 1148.373 | 12.83771 | 1148.335 | 13.29    | 1148.372 | 13.09    | 1148.359 | 13.0865 |
| 13.3     | 1148.373 | 12.84    | 1148.336 | 13.29614 | 1148.372 | 13.09747 | 1148.36  | 13.09   |
| 13.30762 | 1148.373 | 12.84771 | 1148.337 | 13.3     | 1148.373 | 13.1     | 1148.36  | 13.0965 |
| 13.31    | 1148.373 | 12.85    | 1148.337 | 13.30614 | 1148.373 | 13.10747 | 1148.36  | 13.1    |
| 13.31762 | 1148.374 | 12.85771 | 1148.338 | 13.31    | 1148.373 | 13.11    | 1148.361 | 13.1065 |
| 13.32    | 1148.374 | 12.86    | 1148.338 | 13.31614 | 1148.374 | 13.11747 | 1148.361 | 13.11   |
| 13.32762 | 1148.374 | 12.86771 | 1148.339 | 13.32    | 1148.374 | 13.12    | 1148.361 | 13.1165 |



|          |          |          |          |          |          |          |          |         |
|----------|----------|----------|----------|----------|----------|----------|----------|---------|
| 13.33    | 1148.374 | 12.87    | 1148.339 | 13.32614 | 1148.374 | 13.12747 | 1148.362 | 13.12   |
| 13.33762 | 1148.375 | 12.87771 | 1148.34  | 13.33    | 1148.374 | 13.13    | 1148.362 | 13.1265 |
| 13.34    | 1148.375 | 12.88    | 1148.34  | 13.33614 | 1148.375 | 13.13747 | 1148.363 | 13.13   |
| 13.34762 | 1148.375 | 12.88771 | 1148.341 | 13.34    | 1148.375 | 13.14    | 1148.363 | 13.1365 |
| 13.35    | 1148.375 | 12.89    | 1148.341 | 13.34614 | 1148.375 | 13.14747 | 1148.363 | 13.14   |
| 13.35762 | 1148.376 | 12.89771 | 1148.342 | 13.35    | 1148.375 | 13.15    | 1148.363 | 13.1465 |
| 13.36    | 1148.376 | 12.9     | 1148.342 | 13.35614 | 1148.376 | 13.15747 | 1148.364 | 13.15   |
| 13.36762 | 1148.376 | 12.90771 | 1148.343 | 13.36    | 1148.376 | 13.16    | 1148.364 | 13.1565 |
| 13.37    | 1148.376 | 12.91    | 1148.343 | 13.36614 | 1148.376 | 13.16747 | 1148.365 | 13.16   |
| 13.37762 | 1148.377 | 12.91771 | 1148.344 | 13.37    | 1148.376 | 13.17    | 1148.365 | 13.1665 |
| 13.38    | 1148.377 | 12.92    | 1148.344 | 13.37614 | 1148.377 | 13.17747 | 1148.365 | 13.17   |
| 13.38762 | 1148.377 | 12.92771 | 1148.345 | 13.38    | 1148.377 | 13.18    | 1148.366 | 13.1765 |
| 13.39    | 1148.377 | 12.93    | 1148.345 | 13.38614 | 1148.377 | 13.18747 | 1148.366 | 13.18   |
| 13.39762 | 1148.378 | 12.93771 | 1148.346 | 13.39    | 1148.377 | 13.19    | 1148.366 | 13.1865 |
| 13.4     | 1148.378 | 12.94    | 1148.346 | 13.39614 | 1148.378 | 13.19747 | 1148.367 | 13.19   |
| 13.40762 | 1148.378 | 12.94771 | 1148.347 | 13.4     | 1148.378 | 13.2     | 1148.367 | 13.1965 |
| 13.41    | 1148.378 | 12.95    | 1148.347 | 13.40614 | 1148.378 | 13.20747 | 1148.367 | 13.2    |
| 13.41762 | 1148.379 | 12.95771 | 1148.348 | 13.41    | 1148.378 | 13.21    | 1148.367 | 13.2065 |
| 13.42    | 1148.379 | 12.96    | 1148.348 | 13.41614 | 1148.378 | 13.21747 | 1148.368 | 13.21   |
| 13.42762 | 1148.379 | 12.96771 | 1148.349 | 13.42    | 1148.379 | 13.22    | 1148.368 | 13.2165 |
| 13.43    | 1148.379 | 12.97    | 1148.349 | 13.42614 | 1148.379 | 13.22747 | 1148.369 | 13.22   |
| 13.43762 | 1148.38  | 12.97771 | 1148.35  | 13.43    | 1148.379 | 13.23    | 1148.369 | 13.2265 |
| 13.44    | 1148.38  | 12.98    | 1148.35  | 13.43614 | 1148.379 | 13.23747 | 1148.369 | 13.23   |
| 13.44762 | 1148.38  | 12.98771 | 1148.351 | 13.44    | 1148.38  | 13.24    | 1148.369 | 13.2365 |
| 13.45    | 1148.38  | 12.99    | 1148.351 | 13.44614 | 1148.38  | 13.24747 | 1148.37  | 13.24   |
| 13.45762 | 1148.38  | 12.99771 | 1148.352 | 13.45    | 1148.38  | 13.25    | 1148.37  | 13.2465 |
| 13.46    | 1148.38  | 13       | 1148.352 | 13.45614 | 1148.38  | 13.25747 | 1148.37  | 13.25   |
| 13.46762 | 1148.381 | 13.00771 | 1148.352 | 13.46    | 1148.38  | 13.26    | 1148.371 | 13.2565 |
| 13.47    | 1148.381 | 13.01    | 1148.353 | 13.46614 | 1148.381 | 13.26747 | 1148.371 | 13.26   |
| 13.47762 | 1148.381 | 13.01771 | 1148.353 | 13.47    | 1148.381 | 13.27    | 1148.371 | 13.2665 |
| 13.48    | 1148.381 | 13.02    | 1148.353 | 13.47614 | 1148.381 | 13.27747 | 1148.372 | 13.27   |
| 13.48762 | 1148.382 | 13.02771 | 1148.354 | 13.48    | 1148.381 | 13.28    | 1148.372 | 13.2765 |
| 13.49    | 1148.382 | 13.03    | 1148.354 | 13.48614 | 1148.381 | 13.28747 | 1148.372 | 13.28   |
| 13.49762 | 1148.382 | 13.03771 | 1148.355 | 13.49    | 1148.382 | 13.29    | 1148.372 | 13.2865 |
| 13.5     | 1148.382 | 13.04    | 1148.355 | 13.49614 | 1148.382 | 13.29747 | 1148.373 | 13.29   |
| 13.50762 | 1148.382 | 13.04771 | 1148.356 | 13.5     | 1148.382 | 13.3     | 1148.373 | 13.2965 |
| 13.51    | 1148.382 | 13.05    | 1148.356 | 13.50614 | 1148.382 | 13.30747 | 1148.373 | 13.3    |
| 13.51762 | 1148.383 | 13.05771 | 1148.357 | 13.51    | 1148.382 | 13.31    | 1148.373 | 13.3065 |
| 13.52    | 1148.383 | 13.06    | 1148.357 | 13.51614 | 1148.383 | 13.31747 | 1148.374 | 13.31   |
| 13.52762 | 1148.383 | 13.06771 | 1148.357 | 13.52    | 1148.383 | 13.32    | 1148.374 | 13.3165 |
| 13.53    | 1148.383 | 13.07    | 1148.358 | 13.52614 | 1148.383 | 13.32747 | 1148.374 | 13.32   |
| 13.53762 | 1148.383 | 13.07771 | 1148.358 | 13.53    | 1148.383 | 13.33    | 1148.374 | 13.3265 |
| 13.54    | 1148.384 | 13.08    | 1148.358 | 13.53614 | 1148.383 | 13.33747 | 1148.375 | 13.33   |
| 13.54762 | 1148.384 | 13.08771 | 1148.359 | 13.54    | 1148.383 | 13.34    | 1148.375 | 13.3365 |
| 13.55    | 1148.384 | 13.09    | 1148.359 | 13.54614 | 1148.384 | 13.34747 | 1148.375 | 13.34   |
| 13.55762 | 1148.384 | 13.09771 | 1148.36  | 13.55    | 1148.384 | 13.35    | 1148.375 | 13.3465 |
| 13.56    | 1148.384 | 13.1     | 1148.36  | 13.55614 | 1148.384 | 13.35747 | 1148.376 | 13.35   |

|          |          |          |          |          |          |          |          |         |
|----------|----------|----------|----------|----------|----------|----------|----------|---------|
| 13.56762 | 1148.385 | 13.10771 | 1148.361 | 13.56    | 1148.384 | 13.36    | 1148.376 | 13.3565 |
| 13.57    | 1148.385 | 13.11    | 1148.361 | 13.56614 | 1148.384 | 13.36747 | 1148.376 | 13.36   |
| 13.57762 | 1148.385 | 13.11771 | 1148.361 | 13.57    | 1148.385 | 13.37    | 1148.376 | 13.3665 |
| 13.58    | 1148.385 | 13.12    | 1148.361 | 13.57614 | 1148.385 | 13.37747 | 1148.377 | 13.37   |
| 13.58762 | 1148.385 | 13.12771 | 1148.362 | 13.58    | 1148.385 | 13.38    | 1148.377 | 13.3765 |
| 13.59    | 1148.385 | 13.13    | 1148.362 | 13.58614 | 1148.385 | 13.38747 | 1148.377 | 13.38   |
| 13.59762 | 1148.386 | 13.13771 | 1148.363 | 13.59    | 1148.385 | 13.39    | 1148.377 | 13.3865 |
| 13.6     | 1148.386 | 13.14    | 1148.363 | 13.59614 | 1148.385 | 13.39747 | 1148.378 | 13.39   |
| 13.60762 | 1148.386 | 13.14771 | 1148.363 | 13.6     | 1148.386 | 13.4     | 1148.378 | 13.3965 |
| 13.61    | 1148.386 | 13.15    | 1148.364 | 13.60614 | 1148.386 | 13.40747 | 1148.378 | 13.4    |
| 13.61762 | 1148.386 | 13.15771 | 1148.364 | 13.61    | 1148.386 | 13.41    | 1148.378 | 13.4065 |
| 13.62    | 1148.386 | 13.16    | 1148.364 | 13.61614 | 1148.386 | 13.41747 | 1148.379 | 13.41   |
| 13.62762 | 1148.386 | 13.16771 | 1148.365 | 13.62    | 1148.386 | 13.42    | 1148.379 | 13.4165 |
| 13.63    | 1148.387 | 13.17    | 1148.365 | 13.62614 | 1148.386 | 13.42747 | 1148.379 | 13.42   |
| 13.63762 | 1148.387 | 13.17771 | 1148.365 | 13.63    | 1148.386 | 13.43    | 1148.379 | 13.4265 |
| 13.64    | 1148.387 | 13.18    | 1148.366 | 13.63614 | 1148.387 | 13.43747 | 1148.38  | 13.43   |
| 13.64762 | 1148.387 | 13.18771 | 1148.366 | 13.64    | 1148.387 | 13.44    | 1148.38  | 13.4365 |
| 13.65    | 1148.387 | 13.19    | 1148.366 | 13.64614 | 1148.387 | 13.44747 | 1148.38  | 13.44   |
| 13.65762 | 1148.387 | 13.19771 | 1148.367 | 13.65    | 1148.387 | 13.45    | 1148.38  | 13.4465 |
| 13.66    | 1148.387 | 13.2     | 1148.367 | 13.65614 | 1148.387 | 13.45747 | 1148.38  | 13.45   |
| 13.66762 | 1148.388 | 13.20771 | 1148.367 | 13.66    | 1148.387 | 13.46    | 1148.38  | 13.4565 |
| 13.67    | 1148.388 | 13.21    | 1148.368 | 13.66614 | 1148.388 | 13.46747 | 1148.381 | 13.46   |
| 13.67762 | 1148.388 | 13.21771 | 1148.368 | 13.67    | 1148.388 | 13.47    | 1148.381 | 13.4665 |
| 13.68    | 1148.388 | 13.22    | 1148.368 | 13.67614 | 1148.388 | 13.47747 | 1148.381 | 13.47   |
| 13.68762 | 1148.388 | 13.22771 | 1148.369 | 13.68    | 1148.388 | 13.48    | 1148.381 | 13.4765 |
| 13.69    | 1148.388 | 13.23    | 1148.369 | 13.68614 | 1148.388 | 13.48747 | 1148.382 | 13.48   |
| 13.69762 | 1148.389 | 13.23771 | 1148.369 | 13.69    | 1148.388 | 13.49    | 1148.382 | 13.4865 |
| 13.7     | 1148.389 | 13.24    | 1148.369 | 13.69614 | 1148.388 | 13.49747 | 1148.382 | 13.49   |
| 13.70762 | 1148.389 | 13.24771 | 1148.37  | 13.7     | 1148.389 | 13.5     | 1148.382 | 13.4965 |
| 13.71    | 1148.389 | 13.25    | 1148.37  | 13.70614 | 1148.389 | 13.50747 | 1148.382 | 13.5    |
| 13.71762 | 1148.389 | 13.25771 | 1148.371 | 13.71    | 1148.389 | 13.51    | 1148.382 | 13.5065 |
| 13.72    | 1148.389 | 13.26    | 1148.371 | 13.71614 | 1148.389 | 13.51747 | 1148.383 | 13.51   |
| 13.72762 | 1148.389 | 13.26771 | 1148.371 | 13.72    | 1148.389 | 13.52    | 1148.383 | 13.5165 |
| 13.73    | 1148.389 | 13.27    | 1148.371 | 13.72614 | 1148.389 | 13.52747 | 1148.383 | 13.52   |
| 13.73762 | 1148.39  | 13.27771 | 1148.372 | 13.73    | 1148.389 | 13.53    | 1148.383 | 13.5265 |
| 13.74    | 1148.39  | 13.28    | 1148.372 | 13.73614 | 1148.389 | 13.53747 | 1148.383 | 13.53   |
| 13.74762 | 1148.39  | 13.28771 | 1148.372 | 13.74    | 1148.39  | 13.54    | 1148.384 | 13.5365 |
| 13.75    | 1148.39  | 13.29    | 1148.372 | 13.74614 | 1148.39  | 13.54747 | 1148.384 | 13.54   |
| 13.75762 | 1148.39  | 13.29771 | 1148.373 | 13.75    | 1148.39  | 13.55    | 1148.384 | 13.5465 |
| 13.76    | 1148.39  | 13.3     | 1148.373 | 13.75614 | 1148.39  | 13.55747 | 1148.384 | 13.55   |
| 13.76762 | 1148.39  | 13.30771 | 1148.373 | 13.76    | 1148.39  | 13.56    | 1148.384 | 13.5565 |
| 13.77    | 1148.39  | 13.31    | 1148.373 | 13.76614 | 1148.39  | 13.56747 | 1148.385 | 13.56   |
| 13.77762 | 1148.391 | 13.31771 | 1148.374 | 13.77    | 1148.39  | 13.57    | 1148.385 | 13.5665 |
| 13.78    | 1148.391 | 13.32    | 1148.374 | 13.77614 | 1148.39  | 13.57747 | 1148.385 | 13.57   |
| 13.78762 | 1148.391 | 13.32771 | 1148.374 | 13.78    | 1148.391 | 13.58    | 1148.385 | 13.5765 |
| 13.79    | 1148.391 | 13.33    | 1148.374 | 13.78614 | 1148.391 | 13.58747 | 1148.385 | 13.58   |
| 13.79762 | 1148.391 | 13.33771 | 1148.375 | 13.79    | 1148.391 | 13.59    | 1148.385 | 13.5865 |

|          |          |          |          |          |          |          |          |         |
|----------|----------|----------|----------|----------|----------|----------|----------|---------|
| 13.8     | 1148.391 | 13.34    | 1148.375 | 13.79614 | 1148.391 | 13.59747 | 1148.386 | 13.59   |
| 13.80762 | 1148.391 | 13.34771 | 1148.375 | 13.8     | 1148.391 | 13.6     | 1148.386 | 13.5965 |
| 13.81    | 1148.391 | 13.35    | 1148.376 | 13.80614 | 1148.391 | 13.60747 | 1148.386 | 13.6    |
| 13.81762 | 1148.391 | 13.35771 | 1148.376 | 13.81    | 1148.391 | 13.61    | 1148.386 | 13.6065 |
| 13.82    | 1148.391 | 13.36    | 1148.376 | 13.81614 | 1148.391 | 13.61747 | 1148.386 | 13.61   |
| 13.82762 | 1148.392 | 13.36771 | 1148.376 | 13.82    | 1148.391 | 13.62    | 1148.386 | 13.6165 |
| 13.83    | 1148.392 | 13.37    | 1148.377 | 13.82614 | 1148.392 | 13.62747 | 1148.386 | 13.62   |
| 13.83762 | 1148.392 | 13.37771 | 1148.377 | 13.83    | 1148.392 | 13.63    | 1148.387 | 13.6265 |
| 13.84    | 1148.392 | 13.38    | 1148.377 | 13.83614 | 1148.392 | 13.63747 | 1148.387 | 13.63   |
| 13.84762 | 1148.392 | 13.38771 | 1148.377 | 13.84    | 1148.392 | 13.64    | 1148.387 | 13.6365 |
| 13.85    | 1148.392 | 13.39    | 1148.377 | 13.84614 | 1148.392 | 13.64747 | 1148.387 | 13.64   |
| 13.85762 | 1148.392 | 13.39771 | 1148.378 | 13.85    | 1148.392 | 13.65    | 1148.387 | 13.6465 |
| 13.86    | 1148.392 | 13.4     | 1148.378 | 13.85614 | 1148.392 | 13.65747 | 1148.387 | 13.65   |
| 13.86762 | 1148.392 | 13.40771 | 1148.378 | 13.86    | 1148.392 | 13.66    | 1148.387 | 13.6565 |
| 13.87    | 1148.393 | 13.41    | 1148.378 | 13.86614 | 1148.392 | 13.66747 | 1148.388 | 13.66   |
| 13.87762 | 1148.393 | 13.41771 | 1148.379 | 13.87    | 1148.392 | 13.67    | 1148.388 | 13.6665 |
| 13.88    | 1148.393 | 13.42    | 1148.379 | 13.87614 | 1148.393 | 13.67747 | 1148.388 | 13.67   |
| 13.88762 | 1148.393 | 13.42771 | 1148.379 | 13.88    | 1148.393 | 13.68    | 1148.388 | 13.6765 |
| 13.89    | 1148.393 | 13.43    | 1148.379 | 13.88614 | 1148.393 | 13.68747 | 1148.388 | 13.68   |
| 13.89762 | 1148.393 | 13.43771 | 1148.38  | 13.89    | 1148.393 | 13.69    | 1148.388 | 13.6865 |
| 13.9     | 1148.393 | 13.44    | 1148.38  | 13.89614 | 1148.393 | 13.69747 | 1148.389 | 13.69   |
| 13.90762 | 1148.393 | 13.44771 | 1148.38  | 13.9     | 1148.393 | 13.7     | 1148.389 | 13.6965 |
| 13.91    | 1148.393 | 13.45    | 1148.38  | 13.90614 | 1148.393 | 13.70747 | 1148.389 | 13.7    |
| 13.91762 | 1148.393 | 13.45771 | 1148.38  | 13.91    | 1148.393 | 13.71    | 1148.389 | 13.7065 |
| 13.92    | 1148.393 | 13.46    | 1148.381 | 13.91614 | 1148.393 | 13.71747 | 1148.389 | 13.71   |
| 13.92762 | 1148.394 | 13.46771 | 1148.381 | 13.92    | 1148.393 | 13.72    | 1148.389 | 13.7165 |
| 13.93    | 1148.394 | 13.47    | 1148.381 | 13.92614 | 1148.394 | 13.72747 | 1148.389 | 13.72   |
| 13.93762 | 1148.394 | 13.47771 | 1148.381 | 13.93    | 1148.394 | 13.73    | 1148.389 | 13.7265 |
| 13.94    | 1148.394 | 13.48    | 1148.381 | 13.93614 | 1148.394 | 13.73747 | 1148.39  | 13.73   |
| 13.94762 | 1148.394 | 13.48771 | 1148.382 | 13.94    | 1148.394 | 13.74    | 1148.39  | 13.7365 |
| 13.95    | 1148.394 | 13.49    | 1148.382 | 13.94614 | 1148.394 | 13.74747 | 1148.39  | 13.74   |
| 13.95762 | 1148.394 | 13.49771 | 1148.382 | 13.95    | 1148.394 | 13.75    | 1148.39  | 13.7465 |
| 13.96    | 1148.394 | 13.5     | 1148.382 | 13.95614 | 1148.394 | 13.75747 | 1148.39  | 13.75   |
| 13.96762 | 1148.394 | 13.50771 | 1148.382 | 13.96    | 1148.394 | 13.76    | 1148.39  | 13.7565 |
| 13.97    | 1148.394 | 13.51    | 1148.383 | 13.96614 | 1148.394 | 13.76747 | 1148.39  | 13.76   |
| 13.97762 | 1148.394 | 13.51771 | 1148.383 | 13.97    | 1148.394 | 13.77    | 1148.39  | 13.7665 |
| 13.98    | 1148.394 | 13.52    | 1148.383 | 13.97614 | 1148.394 | 13.77747 | 1148.391 | 13.77   |
| 13.98762 | 1148.395 | 13.52771 | 1148.383 | 13.98    | 1148.394 | 13.78    | 1148.391 | 13.7765 |
| 13.99    | 1148.395 | 13.53    | 1148.383 | 13.98614 | 1148.395 | 13.78747 | 1148.391 | 13.78   |
| 13.99762 | 1148.395 | 13.53771 | 1148.384 | 13.99    | 1148.395 | 13.79    | 1148.391 | 13.7865 |
| 14       | 1148.395 | 13.54    | 1148.384 | 13.99614 | 1148.395 | 13.79747 | 1148.391 | 13.79   |
| 14.00762 | 1148.395 | 13.54771 | 1148.384 | 14       | 1148.395 | 13.8     | 1148.391 | 13.7965 |
| 14.01    | 1148.395 | 13.55    | 1148.384 | 14.00614 | 1148.395 | 13.80747 | 1148.391 | 13.8    |
| 14.01762 | 1148.395 | 13.55771 | 1148.384 | 14.01    | 1148.395 | 13.81    | 1148.391 | 13.8065 |
| 14.02    | 1148.395 | 13.56    | 1148.384 | 14.01614 | 1148.395 | 13.81747 | 1148.391 | 13.81   |
| 14.02762 | 1148.395 | 13.56771 | 1148.385 | 14.02    | 1148.395 | 13.82    | 1148.391 | 13.8165 |
| 14.03    | 1148.395 | 13.57    | 1148.385 | 14.02614 | 1148.395 | 13.82747 | 1148.392 | 13.82   |

|          |          |          |          |          |          |          |          |         |
|----------|----------|----------|----------|----------|----------|----------|----------|---------|
| 14.03762 | 1148.395 | 13.57771 | 1148.385 | 14.03    | 1148.395 | 13.83    | 1148.392 | 13.8265 |
| 14.04    | 1148.395 | 13.58    | 1148.385 | 14.03614 | 1148.395 | 13.83747 | 1148.392 | 13.83   |
| 14.04762 | 1148.396 | 13.58771 | 1148.385 | 14.04    | 1148.395 | 13.84    | 1148.392 | 13.8365 |
| 14.05    | 1148.396 | 13.59    | 1148.385 | 14.04614 | 1148.395 | 13.84747 | 1148.392 | 13.84   |
| 14.05762 | 1148.396 | 13.59771 | 1148.386 | 14.05    | 1148.395 | 13.85    | 1148.392 | 13.8465 |
| 14.06    | 1148.396 | 13.6     | 1148.386 | 14.05614 | 1148.396 | 13.85747 | 1148.392 | 13.85   |
| 14.06762 | 1148.396 | 13.60771 | 1148.386 | 14.06    | 1148.396 | 13.86    | 1148.392 | 13.8565 |
| 14.07    | 1148.396 | 13.61    | 1148.386 | 14.06614 | 1148.396 | 13.86747 | 1148.392 | 13.86   |
| 14.07762 | 1148.396 | 13.61771 | 1148.386 | 14.07    | 1148.396 | 13.87    | 1148.393 | 13.8665 |
| 14.08    | 1148.396 | 13.62    | 1148.386 | 14.07614 | 1148.396 | 13.87747 | 1148.393 | 13.87   |
| 14.08762 | 1148.396 | 13.62771 | 1148.387 | 14.08    | 1148.396 | 13.88    | 1148.393 | 13.8765 |
| 14.09    | 1148.396 | 13.63    | 1148.387 | 14.08614 | 1148.396 | 13.88747 | 1148.393 | 13.88   |
| 14.09762 | 1148.396 | 13.63771 | 1148.387 | 14.09    | 1148.396 | 13.89    | 1148.393 | 13.8865 |
| 14.1     | 1148.396 | 13.64    | 1148.387 | 14.09614 | 1148.396 | 13.89747 | 1148.393 | 13.89   |
| 14.10762 | 1148.396 | 13.64771 | 1148.387 | 14.1     | 1148.396 | 13.9     | 1148.393 | 13.8965 |
| 14.11    | 1148.396 | 13.65    | 1148.387 | 14.10614 | 1148.396 | 13.90747 | 1148.393 | 13.9    |
| 14.11762 | 1148.396 | 13.65771 | 1148.387 | 14.11    | 1148.396 | 13.91    | 1148.393 | 13.9065 |
| 14.12    | 1148.396 | 13.66    | 1148.388 | 14.11614 | 1148.396 | 13.91747 | 1148.393 | 13.91   |
| 14.12762 | 1148.397 | 13.66771 | 1148.388 | 14.12    | 1148.396 | 13.92    | 1148.393 | 13.9165 |
| 14.13    | 1148.397 | 13.67    | 1148.388 | 14.12614 | 1148.397 | 13.92747 | 1148.394 | 13.92   |
| 14.13762 | 1148.397 | 13.67771 | 1148.388 | 14.13    | 1148.397 | 13.93    | 1148.394 | 13.9265 |
| 14.14    | 1148.397 | 13.68    | 1148.388 | 14.13614 | 1148.397 | 13.93747 | 1148.394 | 13.93   |
| 14.14762 | 1148.397 | 13.68771 | 1148.388 | 14.14    | 1148.397 | 13.94    | 1148.394 | 13.9365 |
| 14.15    | 1148.397 | 13.69    | 1148.388 | 14.14614 | 1148.397 | 13.94747 | 1148.394 | 13.94   |
| 14.15762 | 1148.397 | 13.69771 | 1148.389 | 14.15    | 1148.397 | 13.95    | 1148.394 | 13.9465 |
| 14.16    | 1148.397 | 13.7     | 1148.389 | 14.15614 | 1148.397 | 13.95747 | 1148.394 | 13.95   |
| 14.16762 | 1148.397 | 13.70771 | 1148.389 | 14.16    | 1148.397 | 13.96    | 1148.394 | 13.9565 |
| 14.17    | 1148.397 | 13.71    | 1148.389 | 14.16614 | 1148.397 | 13.96747 | 1148.394 | 13.96   |
| 14.17762 | 1148.397 | 13.71771 | 1148.389 | 14.17    | 1148.397 | 13.97    | 1148.394 | 13.9665 |
| 14.18    | 1148.397 | 13.72    | 1148.389 | 14.17614 | 1148.397 | 13.97747 | 1148.394 | 13.97   |
| 14.18762 | 1148.397 | 13.72771 | 1148.389 | 14.18    | 1148.397 | 13.98    | 1148.394 | 13.9765 |
| 14.19    | 1148.397 | 13.73    | 1148.389 | 14.18614 | 1148.397 | 13.98747 | 1148.395 | 13.98   |
| 14.19762 | 1148.397 | 13.73771 | 1148.39  | 14.19    | 1148.397 | 13.99    | 1148.395 | 13.9865 |
| 14.2     | 1148.397 | 13.74    | 1148.39  | 14.19614 | 1148.397 | 13.99747 | 1148.395 | 13.99   |
| 14.20762 | 1148.397 | 13.74771 | 1148.39  | 14.2     | 1148.397 | 14       | 1148.395 | 13.9965 |
| 14.21    | 1148.397 | 13.75    | 1148.39  | 14.20614 | 1148.397 | 14.00747 | 1148.395 | 14      |
| 14.21762 | 1148.398 | 13.75771 | 1148.39  | 14.21    | 1148.397 | 14.01    | 1148.395 | 14.0065 |
| 14.22    | 1148.398 | 13.76    | 1148.39  | 14.21614 | 1148.398 | 14.01747 | 1148.395 | 14.01   |
| 14.22762 | 1148.398 | 13.76771 | 1148.39  | 14.22    | 1148.398 | 14.02    | 1148.395 | 14.0165 |
| 14.23    | 1148.398 | 13.77    | 1148.39  | 14.22614 | 1148.398 | 14.02747 | 1148.395 | 14.02   |
| 14.23762 | 1148.398 | 13.77771 | 1148.391 | 14.23    | 1148.398 | 14.03    | 1148.395 | 14.0265 |
| 14.24    | 1148.398 | 13.78    | 1148.391 | 14.23614 | 1148.398 | 14.03747 | 1148.395 | 14.03   |
| 14.24762 | 1148.398 | 13.78771 | 1148.391 | 14.24    | 1148.398 | 14.04    | 1148.395 | 14.0365 |
| 14.25    | 1148.398 | 13.79    | 1148.391 | 14.24614 | 1148.398 | 14.04747 | 1148.396 | 14.04   |
| 14.25762 | 1148.398 | 13.79771 | 1148.391 | 14.25    | 1148.398 | 14.05    | 1148.396 | 14.0465 |
| 14.26    | 1148.398 | 13.8     | 1148.391 | 14.25614 | 1148.398 | 14.05747 | 1148.396 | 14.05   |
| 14.26762 | 1148.398 | 13.80771 | 1148.391 | 14.26    | 1148.398 | 14.06    | 1148.396 | 14.0565 |

|          |          |          |          |          |          |          |          |         |
|----------|----------|----------|----------|----------|----------|----------|----------|---------|
| 14.27    | 1148.398 | 13.81    | 1148.391 | 14.26614 | 1148.398 | 14.06747 | 1148.396 | 14.06   |
| 14.27762 | 1148.398 | 13.81771 | 1148.391 | 14.27    | 1148.398 | 14.07    | 1148.396 | 14.0665 |
| 14.28    | 1148.398 | 13.82    | 1148.392 | 14.27614 | 1148.398 | 14.07747 | 1148.396 | 14.07   |
| 14.28762 | 1148.398 | 13.82771 | 1148.392 | 14.28    | 1148.398 | 14.08    | 1148.396 | 14.0765 |
| 14.29    | 1148.398 | 13.83    | 1148.392 | 14.28614 | 1148.398 | 14.08747 | 1148.396 | 14.08   |
| 14.29762 | 1148.398 | 13.83771 | 1148.392 | 14.29    | 1148.398 | 14.09    | 1148.396 | 14.0865 |
| 14.3     | 1148.398 | 13.84    | 1148.392 | 14.29614 | 1148.398 | 14.09747 | 1148.396 | 14.09   |
| 14.30762 | 1148.398 | 13.84771 | 1148.392 | 14.3     | 1148.398 | 14.1     | 1148.396 | 14.0965 |
| 14.31    | 1148.398 | 13.85    | 1148.392 | 14.30614 | 1148.398 | 14.10747 | 1148.396 | 14.1    |
| 14.31762 | 1148.399 | 13.85771 | 1148.392 | 14.31    | 1148.398 | 14.11    | 1148.396 | 14.1065 |
| 14.32    | 1148.399 | 13.86    | 1148.392 | 14.31614 | 1148.398 | 14.11747 | 1148.396 | 14.11   |
| 14.32762 | 1148.399 | 13.86771 | 1148.393 | 14.32    | 1148.398 | 14.12    | 1148.396 | 14.1165 |
| 14.33    | 1148.399 | 13.87    | 1148.393 | 14.32614 | 1148.399 | 14.12747 | 1148.397 | 14.12   |
| 14.33762 | 1148.399 | 13.87771 | 1148.393 | 14.33    | 1148.399 | 14.13    | 1148.397 | 14.1265 |
| 14.34    | 1148.399 | 13.88    | 1148.393 | 14.33614 | 1148.399 | 14.13747 | 1148.397 | 14.13   |
| 14.34762 | 1148.399 | 13.88771 | 1148.393 | 14.34    | 1148.399 | 14.14    | 1148.397 | 14.1365 |
| 14.35    | 1148.399 | 13.89    | 1148.393 | 14.34614 | 1148.399 | 14.14747 | 1148.397 | 14.14   |
| 14.35762 | 1148.399 | 13.89771 | 1148.393 | 14.35    | 1148.399 | 14.15    | 1148.397 | 14.1465 |
| 14.36    | 1148.399 | 13.9     | 1148.393 | 14.35614 | 1148.399 | 14.15747 | 1148.397 | 14.15   |
| 14.36762 | 1148.399 | 13.90771 | 1148.393 | 14.36    | 1148.399 | 14.16    | 1148.397 | 14.1565 |
| 14.37    | 1148.399 | 13.91    | 1148.393 | 14.36614 | 1148.399 | 14.16747 | 1148.397 | 14.16   |
| 14.37762 | 1148.399 | 13.91771 | 1148.393 | 14.37    | 1148.399 | 14.17    | 1148.397 | 14.1665 |
| 14.38    | 1148.399 | 13.92    | 1148.393 | 14.37614 | 1148.399 | 14.17747 | 1148.397 | 14.17   |
| 14.38762 | 1148.399 | 13.92771 | 1148.394 | 14.38    | 1148.399 | 14.18    | 1148.397 | 14.1765 |
| 14.39    | 1148.399 | 13.93    | 1148.394 | 14.38614 | 1148.399 | 14.18747 | 1148.397 | 14.18   |
| 14.39762 | 1148.399 | 13.93771 | 1148.394 | 14.39    | 1148.399 | 14.19    | 1148.397 | 14.1865 |
| 14.4     | 1148.399 | 13.94    | 1148.394 | 14.39614 | 1148.399 | 14.19747 | 1148.397 | 14.19   |
| 14.40762 | 1148.399 | 13.94771 | 1148.394 | 14.4     | 1148.399 | 14.2     | 1148.397 | 14.1965 |
| 14.41    | 1148.399 | 13.95    | 1148.394 | 14.40614 | 1148.399 | 14.20747 | 1148.397 | 14.2    |
| 14.41762 | 1148.399 | 13.95771 | 1148.394 | 14.41    | 1148.399 | 14.21    | 1148.397 | 14.2065 |
| 14.42    | 1148.399 | 13.96    | 1148.394 | 14.41614 | 1148.399 | 14.21747 | 1148.398 | 14.21   |
| 14.42762 | 1148.399 | 13.96771 | 1148.394 | 14.42    | 1148.399 | 14.22    | 1148.398 | 14.2165 |
| 14.43    | 1148.399 | 13.97    | 1148.394 | 14.42614 | 1148.399 | 14.22747 | 1148.398 | 14.22   |
| 14.43762 | 1148.399 | 13.97771 | 1148.394 | 14.43    | 1148.399 | 14.23    | 1148.398 | 14.2265 |
| 14.44    | 1148.399 | 13.98    | 1148.395 | 14.43614 | 1148.399 | 14.23747 | 1148.398 | 14.23   |
| 14.44762 | 1148.399 | 13.98771 | 1148.395 | 14.44    | 1148.399 | 14.24    | 1148.398 | 14.2365 |
| 14.45    | 1148.4   | 13.99    | 1148.395 | 14.44614 | 1148.399 | 14.24747 | 1148.398 | 14.24   |
| 14.45762 | 1148.4   | 13.99771 | 1148.395 | 14.45    | 1148.399 | 14.25    | 1148.398 | 14.2465 |
| 14.46    | 1148.4   | 14       | 1148.395 | 14.45614 | 1148.4   | 14.25747 | 1148.398 | 14.25   |
| 14.46762 | 1148.4   | 14.00771 | 1148.395 | 14.46    | 1148.4   | 14.26    | 1148.398 | 14.2565 |
| 14.47    | 1148.4   | 14.01    | 1148.395 | 14.46614 | 1148.4   | 14.26747 | 1148.398 | 14.26   |
| 14.47762 | 1148.4   | 14.01771 | 1148.395 | 14.47    | 1148.4   | 14.27    | 1148.398 | 14.2665 |
| 14.48    | 1148.4   | 14.02    | 1148.395 | 14.47614 | 1148.4   | 14.27747 | 1148.398 | 14.27   |
| 14.48762 | 1148.4   | 14.02771 | 1148.395 | 14.48    | 1148.4   | 14.28    | 1148.398 | 14.2765 |
| 14.49    | 1148.4   | 14.03    | 1148.395 | 14.48614 | 1148.4   | 14.28747 | 1148.398 | 14.28   |
| 14.49762 | 1148.4   | 14.03771 | 1148.395 | 14.49    | 1148.4   | 14.29    | 1148.398 | 14.2865 |
| 14.5     | 1148.4   | 14.04    | 1148.395 | 14.49614 | 1148.4   | 14.29747 | 1148.398 | 14.29   |

|          |          |          |          |          |          |          |          |         |
|----------|----------|----------|----------|----------|----------|----------|----------|---------|
| 14.50762 | 1148.4   | 14.04771 | 1148.396 | 14.5     | 1148.4   | 14.3     | 1148.398 | 14.2965 |
| 14.51    | 1148.4   | 14.05    | 1148.396 | 14.50614 | 1148.4   | 14.30747 | 1148.398 | 14.3    |
| 14.51762 | 1148.4   | 14.05771 | 1148.396 | 14.51    | 1148.4   | 14.31    | 1148.398 | 14.3065 |
| 14.52    | 1148.4   | 14.06    | 1148.396 | 14.51614 | 1148.4   | 14.31747 | 1148.399 | 14.31   |
| 14.52762 | 1148.4   | 14.06771 | 1148.396 | 14.52    | 1148.4   | 14.32    | 1148.399 | 14.3165 |
| 14.53    | 1148.4   | 14.07    | 1148.396 | 14.52614 | 1148.4   | 14.32747 | 1148.399 | 14.32   |
| 14.53762 | 1148.4   | 14.07771 | 1148.396 | 14.53    | 1148.4   | 14.33    | 1148.399 | 14.3265 |
| 14.54    | 1148.4   | 14.08    | 1148.396 | 14.53614 | 1148.4   | 14.33747 | 1148.399 | 14.33   |
| 14.54762 | 1148.4   | 14.08771 | 1148.396 | 14.54    | 1148.4   | 14.34    | 1148.399 | 14.3365 |
| 14.55    | 1148.4   | 14.09    | 1148.396 | 14.54614 | 1148.4   | 14.34747 | 1148.399 | 14.34   |
| 14.55762 | 1148.4   | 14.09771 | 1148.396 | 14.55    | 1148.4   | 14.35    | 1148.399 | 14.3465 |
| 14.56    | 1148.4   | 14.1     | 1148.396 | 14.55614 | 1148.4   | 14.35747 | 1148.399 | 14.35   |
| 14.56762 | 1148.4   | 14.10771 | 1148.396 | 14.56    | 1148.4   | 14.36    | 1148.399 | 14.3565 |
| 14.57    | 1148.4   | 14.11    | 1148.396 | 14.56614 | 1148.4   | 14.36747 | 1148.399 | 14.36   |
| 14.57762 | 1148.4   | 14.11771 | 1148.396 | 14.57    | 1148.4   | 14.37    | 1148.399 | 14.3665 |
| 14.58    | 1148.4   | 14.12    | 1148.396 | 14.57614 | 1148.4   | 14.37747 | 1148.399 | 14.37   |
| 14.58762 | 1148.4   | 14.12771 | 1148.397 | 14.58    | 1148.4   | 14.38    | 1148.399 | 14.3765 |
| 14.59    | 1148.4   | 14.13    | 1148.397 | 14.58614 | 1148.4   | 14.38747 | 1148.399 | 14.38   |
| 14.59762 | 1148.4   | 14.13771 | 1148.397 | 14.59    | 1148.4   | 14.39    | 1148.399 | 14.3865 |
| 14.6     | 1148.4   | 14.14    | 1148.397 | 14.59614 | 1148.4   | 14.39747 | 1148.399 | 14.39   |
| 14.60762 | 1148.4   | 14.14771 | 1148.397 | 14.6     | 1148.4   | 14.4     | 1148.399 | 14.3965 |
| 14.61    | 1148.4   | 14.15    | 1148.397 | 14.60614 | 1148.4   | 14.40747 | 1148.399 | 14.4    |
| 14.61762 | 1148.4   | 14.15771 | 1148.397 | 14.61    | 1148.4   | 14.41    | 1148.399 | 14.4065 |
| 14.62    | 1148.4   | 14.16    | 1148.397 | 14.61614 | 1148.4   | 14.41747 | 1148.399 | 14.41   |
| 14.62762 | 1148.4   | 14.16771 | 1148.397 | 14.62    | 1148.4   | 14.42    | 1148.399 | 14.4165 |
| 14.63    | 1148.401 | 14.17    | 1148.397 | 14.62614 | 1148.4   | 14.42747 | 1148.399 | 14.42   |
| 14.63762 | 1148.401 | 14.17771 | 1148.397 | 14.63    | 1148.4   | 14.43    | 1148.399 | 14.4265 |
| 14.64    | 1148.401 | 14.18    | 1148.397 | 14.63614 | 1148.401 | 14.43747 | 1148.399 | 14.43   |
| 14.64762 | 1148.401 | 14.18771 | 1148.397 | 14.64    | 1148.401 | 14.44    | 1148.399 | 14.4365 |
| 14.65    | 1148.401 | 14.19    | 1148.397 | 14.64614 | 1148.401 | 14.44747 | 1148.399 | 14.44   |
| 14.65762 | 1148.401 | 14.19771 | 1148.397 | 14.65    | 1148.401 | 14.45    | 1148.399 | 14.4465 |
| 14.66    | 1148.401 | 14.2     | 1148.397 | 14.65614 | 1148.401 | 14.45747 | 1148.4   | 14.45   |
| 14.66762 | 1148.401 | 14.20771 | 1148.397 | 14.66    | 1148.401 | 14.46    | 1148.4   | 14.4565 |
| 14.67    | 1148.401 | 14.21    | 1148.398 | 14.66614 | 1148.401 | 14.46747 | 1148.4   | 14.46   |
| 14.67762 | 1148.401 | 14.21771 | 1148.398 | 14.67    | 1148.401 | 14.47    | 1148.4   | 14.4665 |
| 14.68    | 1148.401 | 14.22    | 1148.398 | 14.67614 | 1148.401 | 14.47747 | 1148.4   | 14.47   |
| 14.68762 | 1148.401 | 14.22771 | 1148.398 | 14.68    | 1148.401 | 14.48    | 1148.4   | 14.4765 |
| 14.69    | 1148.401 | 14.23    | 1148.398 | 14.68614 | 1148.401 | 14.48747 | 1148.4   | 14.48   |
| 14.69762 | 1148.401 | 14.23771 | 1148.398 | 14.69    | 1148.401 | 14.49    | 1148.4   | 14.4865 |
| 14.7     | 1148.401 | 14.24    | 1148.398 | 14.69614 | 1148.401 | 14.49747 | 1148.4   | 14.49   |
| 14.70762 | 1148.401 | 14.24771 | 1148.398 | 14.7     | 1148.401 | 14.5     | 1148.4   | 14.4965 |
| 14.71    | 1148.401 | 14.25    | 1148.398 | 14.70614 | 1148.401 | 14.50747 | 1148.4   | 14.5    |
| 14.71762 | 1148.401 | 14.25771 | 1148.398 | 14.71    | 1148.401 | 14.51    | 1148.4   | 14.5065 |
| 14.72    | 1148.401 | 14.26    | 1148.398 | 14.71614 | 1148.401 | 14.51747 | 1148.4   | 14.51   |
| 14.72762 | 1148.401 | 14.26771 | 1148.398 | 14.72    | 1148.401 | 14.52    | 1148.4   | 14.5165 |
| 14.73    | 1148.401 | 14.27    | 1148.398 | 14.72614 | 1148.401 | 14.52747 | 1148.4   | 14.52   |
| 14.73762 | 1148.401 | 14.27771 | 1148.398 | 14.73    | 1148.401 | 14.53    | 1148.4   | 14.5265 |

|          |          |          |          |          |          |          |          |         |
|----------|----------|----------|----------|----------|----------|----------|----------|---------|
| 14.74    | 1148.401 | 14.28    | 1148.398 | 14.73614 | 1148.401 | 14.53747 | 1148.4   | 14.53   |
| 14.74762 | 1148.401 | 14.28771 | 1148.398 | 14.74    | 1148.401 | 14.54    | 1148.4   | 14.5365 |
| 14.75    | 1148.401 | 14.29    | 1148.398 | 14.74614 | 1148.401 | 14.54747 | 1148.4   | 14.54   |
| 14.75762 | 1148.401 | 14.29771 | 1148.398 | 14.75    | 1148.401 | 14.55    | 1148.4   | 14.5465 |
| 14.76    | 1148.401 | 14.3     | 1148.398 | 14.75614 | 1148.401 | 14.55747 | 1148.4   | 14.55   |
| 14.76762 | 1148.401 | 14.30771 | 1148.398 | 14.76    | 1148.401 | 14.56    | 1148.4   | 14.5565 |
| 14.77    | 1148.401 | 14.31    | 1148.398 | 14.76614 | 1148.401 | 14.56747 | 1148.4   | 14.56   |
| 14.77762 | 1148.401 | 14.31771 | 1148.399 | 14.77    | 1148.401 | 14.57    | 1148.4   | 14.5665 |
| 14.78    | 1148.401 | 14.32    | 1148.399 | 14.77614 | 1148.401 | 14.57747 | 1148.4   | 14.57   |
| 14.78762 | 1148.401 | 14.32771 | 1148.399 | 14.78    | 1148.401 | 14.58    | 1148.4   | 14.5765 |
| 14.79    | 1148.401 | 14.33    | 1148.399 | 14.78614 | 1148.401 | 14.58747 | 1148.4   | 14.58   |
| 14.79762 | 1148.401 | 14.33771 | 1148.399 | 14.79    | 1148.401 | 14.59    | 1148.4   | 14.5865 |
| 14.8     | 1148.401 | 14.34    | 1148.399 | 14.79614 | 1148.401 | 14.59747 | 1148.4   | 14.59   |
| 14.80762 | 1148.401 | 14.34771 | 1148.399 | 14.8     | 1148.401 | 14.6     | 1148.4   | 14.5965 |
| 14.81    | 1148.401 | 14.35    | 1148.399 | 14.80614 | 1148.401 | 14.60747 | 1148.4   | 14.6    |
| 14.81762 | 1148.401 | 14.35771 | 1148.399 | 14.81    | 1148.401 | 14.61    | 1148.4   | 14.6065 |
| 14.82    | 1148.401 | 14.36    | 1148.399 | 14.81614 | 1148.401 | 14.61747 | 1148.4   | 14.61   |
| 14.82762 | 1148.401 | 14.36771 | 1148.399 | 14.82    | 1148.401 | 14.62    | 1148.4   | 14.6165 |
| 14.83    | 1148.401 | 14.37    | 1148.399 | 14.82614 | 1148.401 | 14.62747 | 1148.4   | 14.62   |
| 14.83762 | 1148.401 | 14.37771 | 1148.399 | 14.83    | 1148.401 | 14.63    | 1148.401 | 14.6265 |
| 14.84    | 1148.401 | 14.38    | 1148.399 | 14.83614 | 1148.401 | 14.63747 | 1148.401 | 14.63   |
| 14.84762 | 1148.401 | 14.38771 | 1148.399 | 14.84    | 1148.401 | 14.64    | 1148.401 | 14.6365 |
| 14.85    | 1148.401 | 14.39    | 1148.399 | 14.84614 | 1148.401 | 14.64747 | 1148.401 | 14.64   |
| 14.85762 | 1148.401 | 14.39771 | 1148.399 | 14.85    | 1148.401 | 14.65    | 1148.401 | 14.6465 |
| 14.86    | 1148.401 | 14.4     | 1148.399 | 14.85614 | 1148.401 | 14.65747 | 1148.401 | 14.65   |
| 14.86762 | 1148.401 | 14.40771 | 1148.399 | 14.86    | 1148.401 | 14.66    | 1148.401 | 14.6565 |
| 14.87    | 1148.401 | 14.41    | 1148.399 | 14.86614 | 1148.401 | 14.66747 | 1148.401 | 14.66   |
| 14.87762 | 1148.401 | 14.41771 | 1148.399 | 14.87    | 1148.401 | 14.67    | 1148.401 | 14.6665 |
| 14.88    | 1148.401 | 14.42    | 1148.399 | 14.87614 | 1148.401 | 14.67747 | 1148.401 | 14.67   |
| 14.88762 | 1148.401 | 14.42771 | 1148.399 | 14.88    | 1148.401 | 14.68    | 1148.401 | 14.6765 |
| 14.89    | 1148.401 | 14.43    | 1148.399 | 14.88614 | 1148.401 | 14.68747 | 1148.401 | 14.68   |
| 14.89762 | 1148.401 | 14.43771 | 1148.399 | 14.89    | 1148.401 | 14.69    | 1148.401 | 14.6865 |
| 14.9     | 1148.401 | 14.44    | 1148.399 | 14.89614 | 1148.401 | 14.69747 | 1148.401 | 14.69   |
| 14.90762 | 1148.402 | 14.44771 | 1148.399 | 14.9     | 1148.401 | 14.7     | 1148.401 | 14.6965 |
| 14.91    | 1148.402 | 14.45    | 1148.4   | 14.90614 | 1148.402 | 14.70747 | 1148.401 | 14.7    |
| 14.91762 | 1148.402 | 14.45771 | 1148.4   | 14.91    | 1148.402 | 14.71    | 1148.401 | 14.7065 |
| 14.92    | 1148.402 | 14.46    | 1148.4   | 14.91614 | 1148.402 | 14.71747 | 1148.401 | 14.71   |
| 14.92762 | 1148.402 | 14.46771 | 1148.4   | 14.92    | 1148.402 | 14.72    | 1148.401 | 14.7165 |
| 14.93    | 1148.402 | 14.47    | 1148.4   | 14.92614 | 1148.402 | 14.72747 | 1148.401 | 14.72   |
| 14.93762 | 1148.402 | 14.47771 | 1148.4   | 14.93    | 1148.402 | 14.73    | 1148.401 | 14.7265 |
| 14.94    | 1148.402 | 14.48    | 1148.4   | 14.93614 | 1148.402 | 14.73747 | 1148.401 | 14.73   |
| 14.94762 | 1148.402 | 14.48771 | 1148.4   | 14.94    | 1148.402 | 14.74    | 1148.401 | 14.7365 |
| 14.95    | 1148.402 | 14.49    | 1148.4   | 14.94614 | 1148.402 | 14.74747 | 1148.401 | 14.74   |
| 14.95762 | 1148.402 | 14.49771 | 1148.4   | 14.95    | 1148.402 | 14.75    | 1148.401 | 14.7465 |
| 14.96    | 1148.402 | 14.5     | 1148.4   | 14.95614 | 1148.402 | 14.75747 | 1148.401 | 14.75   |
| 14.96762 | 1148.402 | 14.50771 | 1148.4   | 14.96    | 1148.402 | 14.76    | 1148.401 | 14.7565 |
| 14.97    | 1148.402 | 14.51    | 1148.4   | 14.96614 | 1148.402 | 14.76747 | 1148.401 | 14.76   |

|          |          |          |          |          |          |          |          |         |
|----------|----------|----------|----------|----------|----------|----------|----------|---------|
| 14.97762 | 1148.402 | 14.51771 | 1148.4   | 14.97    | 1148.402 | 14.77    | 1148.401 | 14.7665 |
| 14.98    | 1148.402 | 14.52    | 1148.4   | 14.97614 | 1148.402 | 14.77747 | 1148.401 | 14.77   |
| 14.98762 | 1148.402 | 14.52771 | 1148.4   | 14.98    | 1148.402 | 14.78    | 1148.401 | 14.7765 |
| 14.99    | 1148.402 | 14.53    | 1148.4   | 14.98614 | 1148.402 | 14.78747 | 1148.401 | 14.78   |
| 14.99762 | 1148.402 | 14.53771 | 1148.4   | 14.99    | 1148.402 | 14.79    | 1148.401 | 14.7865 |
| 15       | 1148.402 | 14.54    | 1148.4   | 14.99614 | 1148.402 | 14.79747 | 1148.401 | 14.79   |
| 15.00762 | 1148.402 | 14.54771 | 1148.4   | 15       | 1148.402 | 14.8     | 1148.401 | 14.7965 |
| 15.01    | 1148.402 | 14.55    | 1148.4   | 15.00614 | 1148.402 | 14.80747 | 1148.401 | 14.8    |
| 15.01762 | 1148.402 | 14.55771 | 1148.4   | 15.01    | 1148.402 | 14.81    | 1148.401 | 14.8065 |
| 15.02    | 1148.402 | 14.56    | 1148.4   | 15.01614 | 1148.402 | 14.81747 | 1148.401 | 14.81   |
| 15.02762 | 1148.402 | 14.56771 | 1148.4   | 15.02    | 1148.402 | 14.82    | 1148.401 | 14.8165 |
| 15.03    | 1148.402 | 14.57    | 1148.4   | 15.02614 | 1148.402 | 14.82747 | 1148.401 | 14.82   |
| 15.03762 | 1148.402 | 14.57771 | 1148.4   | 15.03    | 1148.402 | 14.83    | 1148.401 | 14.8265 |
| 15.04    | 1148.402 | 14.58    | 1148.4   | 15.03614 | 1148.402 | 14.83747 | 1148.401 | 14.83   |
| 15.04762 | 1148.402 | 14.58771 | 1148.4   | 15.04    | 1148.402 | 14.84    | 1148.401 | 14.8365 |
| 15.05    | 1148.402 | 14.59    | 1148.4   | 15.04614 | 1148.402 | 14.84747 | 1148.401 | 14.84   |
| 15.05762 | 1148.402 | 14.59771 | 1148.4   | 15.05    | 1148.402 | 14.85    | 1148.401 | 14.8465 |
| 15.06    | 1148.402 | 14.6     | 1148.4   | 15.05614 | 1148.402 | 14.85747 | 1148.401 | 14.85   |
| 15.06762 | 1148.402 | 14.60771 | 1148.4   | 15.06    | 1148.402 | 14.86    | 1148.401 | 14.8565 |
| 15.07    | 1148.402 | 14.61    | 1148.4   | 15.06614 | 1148.402 | 14.86747 | 1148.401 | 14.86   |
| 15.07762 | 1148.402 | 14.61771 | 1148.4   | 15.07    | 1148.402 | 14.87    | 1148.401 | 14.8665 |
| 15.08    | 1148.402 | 14.62    | 1148.4   | 15.07614 | 1148.402 | 14.87747 | 1148.401 | 14.87   |
| 15.08762 | 1148.402 | 14.62771 | 1148.401 | 15.08    | 1148.402 | 14.88    | 1148.401 | 14.8765 |
| 15.09    | 1148.402 | 14.63    | 1148.401 | 15.08614 | 1148.402 | 14.88747 | 1148.401 | 14.88   |
| 15.09762 | 1148.402 | 14.63771 | 1148.401 | 15.09    | 1148.402 | 14.89    | 1148.401 | 14.8865 |
| 15.1     | 1148.402 | 14.64    | 1148.401 | 15.09614 | 1148.402 | 14.89747 | 1148.401 | 14.89   |
| 15.10762 | 1148.402 | 14.64771 | 1148.401 | 15.1     | 1148.402 | 14.9     | 1148.401 | 14.8965 |
| 15.11    | 1148.402 | 14.65    | 1148.401 | 15.10614 | 1148.402 | 14.90747 | 1148.402 | 14.9    |
| 15.11762 | 1148.402 | 14.65771 | 1148.401 | 15.11    | 1148.402 | 14.91    | 1148.402 | 14.9065 |
| 15.12    | 1148.402 | 14.66    | 1148.401 | 15.11614 | 1148.402 | 14.91747 | 1148.402 | 14.91   |
| 15.12762 | 1148.402 | 14.66771 | 1148.401 | 15.12    | 1148.402 | 14.92    | 1148.402 | 14.9165 |
| 15.13    | 1148.402 | 14.67    | 1148.401 | 15.12614 | 1148.402 | 14.92747 | 1148.402 | 14.92   |
| 15.13762 | 1148.402 | 14.67771 | 1148.401 | 15.13    | 1148.402 | 14.93    | 1148.402 | 14.9265 |
| 15.14    | 1148.402 | 14.68    | 1148.401 | 15.13614 | 1148.402 | 14.93747 | 1148.402 | 14.93   |
| 15.14762 | 1148.402 | 14.68771 | 1148.401 | 15.14    | 1148.402 | 14.94    | 1148.402 | 14.9365 |
| 15.15    | 1148.402 | 14.69    | 1148.401 | 15.14614 | 1148.402 | 14.94747 | 1148.402 | 14.94   |
| 15.15762 | 1148.402 | 14.69771 | 1148.401 | 15.15    | 1148.402 | 14.95    | 1148.402 | 14.9465 |
| 15.16    | 1148.402 | 14.7     | 1148.401 | 15.15614 | 1148.402 | 14.95747 | 1148.402 | 14.95   |
| 15.16762 | 1148.402 | 14.70771 | 1148.401 | 15.16    | 1148.402 | 14.96    | 1148.402 | 14.9565 |
| 15.17    | 1148.402 | 14.71    | 1148.401 | 15.16614 | 1148.402 | 14.96747 | 1148.402 | 14.96   |
| 15.17762 | 1148.402 | 14.71771 | 1148.401 | 15.17    | 1148.402 | 14.97    | 1148.402 | 14.9665 |
| 15.18    | 1148.402 | 14.72    | 1148.401 | 15.17614 | 1148.402 | 14.97747 | 1148.402 | 14.97   |
| 15.18762 | 1148.402 | 14.72771 | 1148.401 | 15.18    | 1148.402 | 14.98    | 1148.402 | 14.9765 |
| 15.19    | 1148.402 | 14.73    | 1148.401 | 15.18614 | 1148.402 | 14.98747 | 1148.402 | 14.98   |
| 15.19762 | 1148.402 | 14.73771 | 1148.401 | 15.19    | 1148.402 | 14.99    | 1148.402 | 14.9865 |
| 15.2     | 1148.402 | 14.74    | 1148.401 | 15.19614 | 1148.402 | 14.99747 | 1148.402 | 14.99   |
| 15.20762 | 1148.402 | 14.74771 | 1148.401 | 15.2     | 1148.402 | 15       | 1148.402 | 14.9965 |



|          |          |          |          |          |          |          |          |         |
|----------|----------|----------|----------|----------|----------|----------|----------|---------|
| 15.21    | 1148.402 | 14.75    | 1148.401 | 15.20614 | 1148.402 | 15.00747 | 1148.402 | 15      |
| 15.21762 | 1148.402 | 14.75771 | 1148.401 | 15.21    | 1148.402 | 15.01    | 1148.402 | 15.0065 |
| 15.22    | 1148.402 | 14.76    | 1148.401 | 15.21614 | 1148.402 | 15.01747 | 1148.402 | 15.01   |
| 15.22762 | 1148.402 | 14.76771 | 1148.401 | 15.22    | 1148.402 | 15.02    | 1148.402 | 15.0165 |
| 15.23    | 1148.402 | 14.77    | 1148.401 | 15.22614 | 1148.402 | 15.02747 | 1148.402 | 15.02   |
| 15.23762 | 1148.402 | 14.77771 | 1148.401 | 15.23    | 1148.402 | 15.03    | 1148.402 | 15.0265 |
| 15.24    | 1148.402 | 14.78    | 1148.401 | 15.23614 | 1148.402 | 15.03747 | 1148.402 | 15.03   |
| 15.24762 | 1148.402 | 14.78771 | 1148.401 | 15.24    | 1148.402 | 15.04    | 1148.402 | 15.0365 |
| 15.25    | 1148.402 | 14.79    | 1148.401 | 15.24614 | 1148.402 | 15.04747 | 1148.402 | 15.04   |
| 15.25762 | 1148.402 | 14.79771 | 1148.401 | 15.25    | 1148.402 | 15.05    | 1148.402 | 15.0465 |
| 15.26    | 1148.402 | 14.8     | 1148.401 | 15.25614 | 1148.402 | 15.05747 | 1148.402 | 15.05   |
| 15.26762 | 1148.402 | 14.80771 | 1148.401 | 15.26    | 1148.402 | 15.06    | 1148.402 | 15.0565 |
| 15.27    | 1148.402 | 14.81    | 1148.401 | 15.26614 | 1148.402 | 15.06747 | 1148.402 | 15.06   |
| 15.27762 | 1148.402 | 14.81771 | 1148.401 | 15.27    | 1148.402 | 15.07    | 1148.402 | 15.0665 |
| 15.28    | 1148.402 | 14.82    | 1148.401 | 15.27614 | 1148.402 | 15.07747 | 1148.402 | 15.07   |
| 15.28762 | 1148.402 | 14.82771 | 1148.401 | 15.28    | 1148.402 | 15.08    | 1148.402 | 15.0765 |
| 15.29    | 1148.402 | 14.83    | 1148.401 | 15.28614 | 1148.402 | 15.08747 | 1148.402 | 15.08   |
| 15.29762 | 1148.402 | 14.83771 | 1148.401 | 15.29    | 1148.402 | 15.09    | 1148.402 | 15.0865 |
| 15.3     | 1148.402 | 14.84    | 1148.401 | 15.29614 | 1148.402 | 15.09747 | 1148.402 | 15.09   |
| 15.30762 | 1148.402 | 14.84771 | 1148.401 | 15.3     | 1148.402 | 15.1     | 1148.402 | 15.0965 |
| 15.31    | 1148.402 | 14.85    | 1148.401 | 15.30614 | 1148.402 | 15.10747 | 1148.402 | 15.1    |
| 15.31762 | 1148.402 | 14.85771 | 1148.401 | 15.31    | 1148.402 | 15.11    | 1148.402 | 15.1065 |
| 15.32    | 1148.402 | 14.86    | 1148.401 | 15.31614 | 1148.402 | 15.11747 | 1148.402 | 15.11   |
| 15.32762 | 1148.402 | 14.86771 | 1148.401 | 15.32    | 1148.402 | 15.12    | 1148.402 | 15.1165 |
| 15.33    | 1148.402 | 14.87    | 1148.401 | 15.32614 | 1148.402 | 15.12747 | 1148.402 | 15.12   |
| 15.33762 | 1148.402 | 14.87771 | 1148.401 | 15.33    | 1148.402 | 15.13    | 1148.402 | 15.1265 |
| 15.34    | 1148.402 | 14.88    | 1148.401 | 15.33614 | 1148.402 | 15.13747 | 1148.402 | 15.13   |
| 15.34762 | 1148.402 | 14.88771 | 1148.401 | 15.34    | 1148.402 | 15.14    | 1148.402 | 15.1365 |
| 15.35    | 1148.402 | 14.89    | 1148.401 | 15.34614 | 1148.402 | 15.14747 | 1148.402 | 15.14   |
| 15.35762 | 1148.402 | 14.89771 | 1148.401 | 15.35    | 1148.402 | 15.15    | 1148.402 | 15.1465 |
| 15.36    | 1148.402 | 14.9     | 1148.402 | 15.35614 | 1148.402 | 15.15747 | 1148.402 | 15.15   |
| 15.36762 | 1148.402 | 14.90771 | 1148.402 | 15.36    | 1148.402 | 15.16    | 1148.402 | 15.1565 |
| 15.37    | 1148.402 | 14.91    | 1148.402 | 15.36614 | 1148.402 | 15.16747 | 1148.402 | 15.16   |
| 15.37762 | 1148.402 | 14.91771 | 1148.402 | 15.37    | 1148.402 | 15.17    | 1148.402 | 15.1665 |
| 15.38    | 1148.402 | 14.92    | 1148.402 | 15.37614 | 1148.402 | 15.17747 | 1148.402 | 15.17   |
| 15.38762 | 1148.402 | 14.92771 | 1148.402 | 15.38    | 1148.402 | 15.18    | 1148.402 | 15.1765 |
| 15.39    | 1148.402 | 14.93    | 1148.402 | 15.38614 | 1148.402 | 15.18747 | 1148.402 | 15.18   |
| 15.39762 | 1148.402 | 14.93771 | 1148.402 | 15.39    | 1148.402 | 15.19    | 1148.402 | 15.1865 |
| 15.4     | 1148.402 | 14.94    | 1148.402 | 15.39614 | 1148.402 | 15.19747 | 1148.402 | 15.19   |
| 15.40762 | 1148.402 | 14.94771 | 1148.402 | 15.4     | 1148.402 | 15.2     | 1148.402 | 15.1965 |
| 15.41    | 1148.402 | 14.95    | 1148.402 | 15.40614 | 1148.402 | 15.20747 | 1148.402 | 15.2    |
| 15.41762 | 1148.402 | 14.95771 | 1148.402 | 15.41    | 1148.402 | 15.21    | 1148.402 | 15.2065 |
| 15.42    | 1148.402 | 14.96    | 1148.402 | 15.41614 | 1148.402 | 15.21747 | 1148.402 | 15.21   |
| 15.42762 | 1148.402 | 14.96771 | 1148.402 | 15.42    | 1148.402 | 15.22    | 1148.402 | 15.2165 |
| 15.43    | 1148.402 | 14.97    | 1148.402 | 15.42614 | 1148.402 | 15.22747 | 1148.402 | 15.22   |
| 15.43762 | 1148.402 | 14.97771 | 1148.402 | 15.43    | 1148.402 | 15.23    | 1148.402 | 15.2265 |
| 15.44    | 1148.402 | 14.98    | 1148.402 | 15.43614 | 1148.402 | 15.23747 | 1148.402 | 15.23   |

|          |          |          |          |          |          |          |          |         |
|----------|----------|----------|----------|----------|----------|----------|----------|---------|
| 15.44762 | 1148.402 | 14.98771 | 1148.402 | 15.44    | 1148.402 | 15.24    | 1148.402 | 15.2365 |
| 15.45    | 1148.402 | 14.99    | 1148.402 | 15.44614 | 1148.402 | 15.24747 | 1148.402 | 15.24   |
| 15.45762 | 1148.402 | 14.99771 | 1148.402 | 15.45    | 1148.402 | 15.25    | 1148.402 | 15.2465 |
| 15.46    | 1148.402 | 15       | 1148.402 | 15.45614 | 1148.402 | 15.25747 | 1148.402 | 15.25   |
| 15.46762 | 1148.402 | 15.00771 | 1148.402 | 15.46    | 1148.402 | 15.26    | 1148.402 | 15.2565 |
| 15.47    | 1148.402 | 15.01    | 1148.402 | 15.46614 | 1148.402 | 15.26747 | 1148.402 | 15.26   |
| 15.47762 | 1148.402 | 15.01771 | 1148.402 | 15.47    | 1148.402 | 15.27    | 1148.402 | 15.2665 |
| 15.48    | 1148.402 | 15.02    | 1148.402 | 15.47614 | 1148.402 | 15.27747 | 1148.402 | 15.27   |
| 15.48762 | 1148.402 | 15.02771 | 1148.402 | 15.48    | 1148.402 | 15.28    | 1148.402 | 15.2765 |
| 15.49    | 1148.402 | 15.03    | 1148.402 | 15.48614 | 1148.402 | 15.28747 | 1148.402 | 15.28   |
| 15.49762 | 1148.402 | 15.03771 | 1148.402 | 15.49    | 1148.402 | 15.29    | 1148.402 | 15.2865 |
| 15.5     | 1148.402 | 15.04    | 1148.402 | 15.49614 | 1148.402 | 15.29747 | 1148.402 | 15.29   |
| 15.50762 | 1148.403 | 15.04771 | 1148.402 | 15.5     | 1148.402 | 15.3     | 1148.402 | 15.2965 |
| 15.51    | 1148.403 | 15.05    | 1148.402 | 15.50614 | 1148.402 | 15.30747 | 1148.402 | 15.3    |
| 15.51762 | 1148.403 | 15.05771 | 1148.402 | 15.51    | 1148.403 | 15.31    | 1148.402 | 15.3065 |
| 15.52    | 1148.403 | 15.06    | 1148.402 | 15.51614 | 1148.403 | 15.31747 | 1148.402 | 15.31   |
| 15.52762 | 1148.403 | 15.06771 | 1148.402 | 15.52    | 1148.403 | 15.32    | 1148.402 | 15.3165 |
| 15.53    | 1148.403 | 15.07    | 1148.402 | 15.52614 | 1148.403 | 15.32747 | 1148.402 | 15.32   |
| 15.53762 | 1148.403 | 15.07771 | 1148.402 | 15.53    | 1148.403 | 15.33    | 1148.402 | 15.3265 |
| 15.54    | 1148.403 | 15.08    | 1148.402 | 15.53614 | 1148.403 | 15.33747 | 1148.402 | 15.33   |
| 15.54762 | 1148.403 | 15.08771 | 1148.402 | 15.54    | 1148.403 | 15.34    | 1148.402 | 15.3365 |
| 15.55    | 1148.403 | 15.09    | 1148.402 | 15.54614 | 1148.403 | 15.34747 | 1148.402 | 15.34   |
| 15.55762 | 1148.403 | 15.09771 | 1148.402 | 15.55    | 1148.403 | 15.35    | 1148.402 | 15.3465 |
| 15.56    | 1148.403 | 15.1     | 1148.402 | 15.55614 | 1148.403 | 15.35747 | 1148.402 | 15.35   |
| 15.56762 | 1148.403 | 15.10771 | 1148.402 | 15.56    | 1148.403 | 15.36    | 1148.402 | 15.3565 |
| 15.57    | 1148.403 | 15.11    | 1148.402 | 15.56614 | 1148.403 | 15.36747 | 1148.402 | 15.36   |
| 15.57762 | 1148.403 | 15.11771 | 1148.402 | 15.57    | 1148.403 | 15.37    | 1148.402 | 15.3665 |
| 15.58    | 1148.403 | 15.12    | 1148.402 | 15.57614 | 1148.403 | 15.37747 | 1148.402 | 15.37   |
| 15.58762 | 1148.403 | 15.12771 | 1148.402 | 15.58    | 1148.403 | 15.38    | 1148.402 | 15.3765 |
| 15.59    | 1148.403 | 15.13    | 1148.402 | 15.58614 | 1148.403 | 15.38747 | 1148.402 | 15.38   |
| 15.59762 | 1148.403 | 15.13771 | 1148.402 | 15.59    | 1148.403 | 15.39    | 1148.402 | 15.3865 |
| 15.6     | 1148.403 | 15.14    | 1148.402 | 15.59614 | 1148.403 | 15.39747 | 1148.402 | 15.39   |
| 15.60762 | 1148.403 | 15.14771 | 1148.402 | 15.6     | 1148.403 | 15.4     | 1148.402 | 15.3965 |
| 15.61    | 1148.403 | 15.15    | 1148.402 | 15.60614 | 1148.403 | 15.40747 | 1148.402 | 15.4    |
| 15.61762 | 1148.403 | 15.15771 | 1148.402 | 15.61    | 1148.403 | 15.41    | 1148.402 | 15.4065 |
| 15.62    | 1148.403 | 15.16    | 1148.402 | 15.61614 | 1148.403 | 15.41747 | 1148.402 | 15.41   |
| 15.62762 | 1148.403 | 15.16771 | 1148.402 | 15.62    | 1148.403 | 15.42    | 1148.402 | 15.4165 |
| 15.63    | 1148.403 | 15.17    | 1148.402 | 15.62614 | 1148.403 | 15.42747 | 1148.402 | 15.42   |
| 15.63762 | 1148.403 | 15.17771 | 1148.402 | 15.63    | 1148.403 | 15.43    | 1148.402 | 15.4265 |
| 15.64    | 1148.403 | 15.18    | 1148.402 | 15.63614 | 1148.403 | 15.43747 | 1148.402 | 15.43   |
| 15.64762 | 1148.403 | 15.18771 | 1148.402 | 15.64    | 1148.403 | 15.44    | 1148.402 | 15.4365 |
| 15.65    | 1148.403 | 15.19    | 1148.402 | 15.64614 | 1148.403 | 15.44747 | 1148.402 | 15.44   |
| 15.65762 | 1148.403 | 15.19771 | 1148.402 | 15.65    | 1148.403 | 15.45    | 1148.402 | 15.4465 |
| 15.66    | 1148.403 | 15.2     | 1148.402 | 15.65614 | 1148.403 | 15.45747 | 1148.402 | 15.45   |
| 15.66762 | 1148.403 | 15.20771 | 1148.402 | 15.66    | 1148.403 | 15.46    | 1148.402 | 15.4565 |
| 15.67    | 1148.403 | 15.21    | 1148.402 | 15.66614 | 1148.403 | 15.46747 | 1148.402 | 15.46   |
| 15.67762 | 1148.403 | 15.21771 | 1148.402 | 15.67    | 1148.403 | 15.47    | 1148.402 | 15.4665 |

|          |          |          |          |          |          |          |          |         |
|----------|----------|----------|----------|----------|----------|----------|----------|---------|
| 15.68    | 1148.403 | 15.22    | 1148.402 | 15.67614 | 1148.403 | 15.47747 | 1148.402 | 15.47   |
| 15.68762 | 1148.403 | 15.22771 | 1148.402 | 15.68    | 1148.403 | 15.48    | 1148.402 | 15.4765 |
| 15.69    | 1148.403 | 15.23    | 1148.402 | 15.68614 | 1148.403 | 15.48747 | 1148.402 | 15.48   |
| 15.69762 | 1148.403 | 15.23771 | 1148.402 | 15.69    | 1148.403 | 15.49    | 1148.402 | 15.4865 |
| 15.7     | 1148.403 | 15.24    | 1148.402 | 15.69614 | 1148.403 | 15.49747 | 1148.402 | 15.49   |
| 15.70762 | 1148.403 | 15.24771 | 1148.402 | 15.7     | 1148.403 | 15.5     | 1148.402 | 15.4965 |
| 15.71    | 1148.403 | 15.25    | 1148.402 | 15.70614 | 1148.403 | 15.50747 | 1148.403 | 15.5    |
| 15.71762 | 1148.403 | 15.25771 | 1148.402 | 15.71    | 1148.403 | 15.51    | 1148.403 | 15.5065 |
| 15.72    | 1148.403 | 15.26    | 1148.402 | 15.71614 | 1148.403 | 15.51747 | 1148.403 | 15.51   |
| 15.72762 | 1148.403 | 15.26771 | 1148.402 | 15.72    | 1148.403 | 15.52    | 1148.403 | 15.5165 |
| 15.73    | 1148.403 | 15.27    | 1148.402 | 15.72614 | 1148.403 | 15.52747 | 1148.403 | 15.52   |
| 15.73762 | 1148.403 | 15.27771 | 1148.402 | 15.73    | 1148.403 | 15.53    | 1148.403 | 15.5265 |
| 15.74    | 1148.403 | 15.28    | 1148.402 | 15.73614 | 1148.403 | 15.53747 | 1148.403 | 15.53   |
| 15.74762 | 1148.403 | 15.28771 | 1148.402 | 15.74    | 1148.403 | 15.54    | 1148.403 | 15.5365 |
| 15.75    | 1148.403 | 15.29    | 1148.402 | 15.74614 | 1148.403 | 15.54747 | 1148.403 | 15.54   |
| 15.75762 | 1148.403 | 15.29771 | 1148.402 | 15.75    | 1148.403 | 15.55    | 1148.403 | 15.5465 |
| 15.76    | 1148.403 | 15.3     | 1148.402 | 15.75614 | 1148.403 | 15.55747 | 1148.403 | 15.55   |
| 15.76762 | 1148.403 | 15.30771 | 1148.402 | 15.76    | 1148.403 | 15.56    | 1148.403 | 15.5565 |
| 15.77    | 1148.403 | 15.31    | 1148.402 | 15.76614 | 1148.403 | 15.56747 | 1148.403 | 15.56   |
| 15.77762 | 1148.403 | 15.31771 | 1148.402 | 15.77    | 1148.403 | 15.57    | 1148.403 | 15.5665 |
| 15.78    | 1148.403 | 15.32    | 1148.402 | 15.77614 | 1148.403 | 15.57747 | 1148.403 | 15.57   |
| 15.78762 | 1148.403 | 15.32771 | 1148.402 | 15.78    | 1148.403 | 15.58    | 1148.403 | 15.5765 |
| 15.79    | 1148.403 | 15.33    | 1148.402 | 15.78614 | 1148.403 | 15.58747 | 1148.403 | 15.58   |
| 15.79762 | 1148.403 | 15.33771 | 1148.402 | 15.79    | 1148.403 | 15.59    | 1148.403 | 15.5865 |
| 15.8     | 1148.403 | 15.34    | 1148.402 | 15.79614 | 1148.403 | 15.59747 | 1148.403 | 15.59   |
| 15.80762 | 1148.403 | 15.34771 | 1148.402 | 15.8     | 1148.403 | 15.6     | 1148.403 | 15.5965 |
| 15.81    | 1148.403 | 15.35    | 1148.402 | 15.80614 | 1148.403 | 15.60747 | 1148.403 | 15.6    |
| 15.81762 | 1148.403 | 15.35771 | 1148.402 | 15.81    | 1148.403 | 15.61    | 1148.403 | 15.6065 |
| 15.82    | 1148.403 | 15.36    | 1148.402 | 15.81614 | 1148.403 | 15.61747 | 1148.403 | 15.61   |
| 15.82762 | 1148.403 | 15.36771 | 1148.402 | 15.82    | 1148.403 | 15.62    | 1148.403 | 15.6165 |
| 15.83    | 1148.403 | 15.37    | 1148.402 | 15.82614 | 1148.403 | 15.62747 | 1148.403 | 15.62   |
| 15.83762 | 1148.403 | 15.37771 | 1148.402 | 15.83    | 1148.403 | 15.63    | 1148.403 | 15.6265 |
| 15.84    | 1148.403 | 15.38    | 1148.402 | 15.83614 | 1148.403 | 15.63747 | 1148.403 | 15.63   |
| 15.84762 | 1148.403 | 15.38771 | 1148.402 | 15.84    | 1148.403 | 15.64    | 1148.403 | 15.6365 |
| 15.85    | 1148.403 | 15.39    | 1148.402 | 15.84614 | 1148.403 | 15.64747 | 1148.403 | 15.64   |
| 15.85762 | 1148.403 | 15.39771 | 1148.402 | 15.85    | 1148.403 | 15.65    | 1148.403 | 15.6465 |
| 15.86    | 1148.403 | 15.4     | 1148.402 | 15.85614 | 1148.403 | 15.65747 | 1148.403 | 15.65   |
| 15.86762 | 1148.403 | 15.40771 | 1148.402 | 15.86    | 1148.403 | 15.66    | 1148.403 | 15.6565 |
| 15.87    | 1148.403 | 15.41    | 1148.402 | 15.86614 | 1148.403 | 15.66747 | 1148.403 | 15.66   |
| 15.87762 | 1148.403 | 15.41771 | 1148.402 | 15.87    | 1148.403 | 15.67    | 1148.403 | 15.6665 |
| 15.88    | 1148.403 | 15.42    | 1148.402 | 15.87614 | 1148.403 | 15.67747 | 1148.403 | 15.67   |
| 15.88762 | 1148.403 | 15.42771 | 1148.402 | 15.88    | 1148.403 | 15.68    | 1148.403 | 15.6765 |
| 15.89    | 1148.403 | 15.43    | 1148.402 | 15.88614 | 1148.403 | 15.68747 | 1148.403 | 15.68   |
| 15.89762 | 1148.403 | 15.43771 | 1148.402 | 15.89    | 1148.403 | 15.69    | 1148.403 | 15.6865 |
| 15.9     | 1148.403 | 15.44    | 1148.402 | 15.89614 | 1148.403 | 15.69747 | 1148.403 | 15.69   |
| 15.90762 | 1148.403 | 15.44771 | 1148.402 | 15.9     | 1148.403 | 15.7     | 1148.403 | 15.6965 |
| 15.91    | 1148.403 | 15.45    | 1148.402 | 15.90614 | 1148.403 | 15.70747 | 1148.403 | 15.7    |

|          |          |          |          |          |          |          |          |         |
|----------|----------|----------|----------|----------|----------|----------|----------|---------|
| 15.91762 | 1148.403 | 15.45771 | 1148.402 | 15.91    | 1148.403 | 15.71    | 1148.403 | 15.7065 |
| 15.92    | 1148.403 | 15.46    | 1148.402 | 15.91614 | 1148.403 | 15.71747 | 1148.403 | 15.71   |
| 15.92762 | 1148.403 | 15.46771 | 1148.402 | 15.92    | 1148.403 | 15.72    | 1148.403 | 15.7165 |
| 15.93    | 1148.403 | 15.47    | 1148.402 | 15.92614 | 1148.403 | 15.72747 | 1148.403 | 15.72   |
| 15.93762 | 1148.403 | 15.47771 | 1148.402 | 15.93    | 1148.403 | 15.73    | 1148.403 | 15.7265 |
| 15.94    | 1148.403 | 15.48    | 1148.402 | 15.93614 | 1148.403 | 15.73747 | 1148.403 | 15.73   |
| 15.94762 | 1148.403 | 15.48771 | 1148.402 | 15.94    | 1148.403 | 15.74    | 1148.403 | 15.7365 |
| 15.95    | 1148.403 | 15.49    | 1148.402 | 15.94614 | 1148.403 | 15.74747 | 1148.403 | 15.74   |
| 15.95762 | 1148.403 | 15.49771 | 1148.402 | 15.95    | 1148.403 | 15.75    | 1148.403 | 15.7465 |
| 15.96    | 1148.403 | 15.5     | 1148.402 | 15.95614 | 1148.403 | 15.75747 | 1148.403 | 15.75   |
| 15.96762 | 1148.403 | 15.50771 | 1148.403 | 15.96    | 1148.403 | 15.76    | 1148.403 | 15.7565 |
| 15.97    | 1148.403 | 15.51    | 1148.403 | 15.96614 | 1148.403 | 15.76747 | 1148.403 | 15.76   |
| 15.97762 | 1148.403 | 15.51771 | 1148.403 | 15.97    | 1148.403 | 15.77    | 1148.403 | 15.7665 |
| 15.98    | 1148.403 | 15.52    | 1148.403 | 15.97614 | 1148.403 | 15.77747 | 1148.403 | 15.77   |
| 15.98762 | 1148.403 | 15.52771 | 1148.403 | 15.98    | 1148.403 | 15.78    | 1148.403 | 15.7765 |
| 15.99    | 1148.403 | 15.53    | 1148.403 | 15.98614 | 1148.403 | 15.78747 | 1148.403 | 15.78   |
| 15.99762 | 1148.403 | 15.53771 | 1148.403 | 15.99    | 1148.403 | 15.79    | 1148.403 | 15.7865 |
| 16       | 1148.403 | 15.54    | 1148.403 | 15.99614 | 1148.403 | 15.79747 | 1148.403 | 15.79   |
| 16.00762 | 1148.403 | 15.54771 | 1148.403 | 16       | 1148.403 | 15.8     | 1148.403 | 15.7965 |
| 16.01    | 1148.403 | 15.55    | 1148.403 | 16.00614 | 1148.403 | 15.80747 | 1148.403 | 15.8    |
| 16.01762 | 1148.403 | 15.55771 | 1148.403 | 16.01    | 1148.403 | 15.81    | 1148.403 | 15.8065 |
| 16.02    | 1148.403 | 15.56    | 1148.403 | 16.01614 | 1148.403 | 15.81747 | 1148.403 | 15.81   |
| 16.02762 | 1148.403 | 15.56771 | 1148.403 | 16.02    | 1148.403 | 15.82    | 1148.403 | 15.8165 |
| 16.03    | 1148.403 | 15.57    | 1148.403 | 16.02614 | 1148.403 | 15.82747 | 1148.403 | 15.82   |
| 16.03762 | 1148.403 | 15.57771 | 1148.403 | 16.03    | 1148.403 | 15.83    | 1148.403 | 15.8265 |
| 16.04    | 1148.403 | 15.58    | 1148.403 | 16.03614 | 1148.403 | 15.83747 | 1148.403 | 15.83   |
| 16.04762 | 1148.403 | 15.58771 | 1148.403 | 16.04    | 1148.403 | 15.84    | 1148.403 | 15.8365 |
| 16.05    | 1148.403 | 15.59    | 1148.403 | 16.04614 | 1148.403 | 15.84747 | 1148.403 | 15.84   |
| 16.05762 | 1148.403 | 15.59771 | 1148.403 | 16.05    | 1148.403 | 15.85    | 1148.403 | 15.8465 |
| 16.06    | 1148.403 | 15.6     | 1148.403 | 16.05614 | 1148.403 | 15.85747 | 1148.403 | 15.85   |
| 16.06762 | 1148.403 | 15.60771 | 1148.403 | 16.06    | 1148.403 | 15.86    | 1148.403 | 15.8565 |
| 16.07    | 1148.403 | 15.61    | 1148.403 | 16.06614 | 1148.403 | 15.86747 | 1148.403 | 15.86   |
| 16.07762 | 1148.403 | 15.61771 | 1148.403 | 16.07    | 1148.403 | 15.87    | 1148.403 | 15.8665 |
| 16.08    | 1148.403 | 15.62    | 1148.403 | 16.07614 | 1148.403 | 15.87747 | 1148.403 | 15.87   |
| 16.08762 | 1148.403 | 15.62771 | 1148.403 | 16.08    | 1148.403 | 15.88    | 1148.403 | 15.8765 |
| 16.09    | 1148.403 | 15.63    | 1148.403 | 16.08614 | 1148.403 | 15.88747 | 1148.403 | 15.88   |
| 16.09762 | 1148.403 | 15.63771 | 1148.403 | 16.09    | 1148.403 | 15.89    | 1148.403 | 15.8865 |
| 16.1     | 1148.403 | 15.64    | 1148.403 | 16.09614 | 1148.403 | 15.89747 | 1148.403 | 15.89   |
| 16.10762 | 1148.403 | 15.64771 | 1148.403 | 16.1     | 1148.403 | 15.9     | 1148.403 | 15.8965 |
| 16.11    | 1148.403 | 15.65    | 1148.403 | 16.10614 | 1148.403 | 15.90747 | 1148.403 | 15.9    |
| 16.11762 | 1148.403 | 15.65771 | 1148.403 | 16.11    | 1148.403 | 15.91    | 1148.403 | 15.9065 |
| 16.12    | 1148.403 | 15.66    | 1148.403 | 16.11614 | 1148.403 | 15.91747 | 1148.403 | 15.91   |
| 16.12762 | 1148.403 | 15.66771 | 1148.403 | 16.12    | 1148.403 | 15.92    | 1148.403 | 15.9165 |
| 16.13    | 1148.403 | 15.67    | 1148.403 | 16.12614 | 1148.403 | 15.92747 | 1148.403 | 15.92   |
| 16.13762 | 1148.403 | 15.67771 | 1148.403 | 16.13    | 1148.403 | 15.93    | 1148.403 | 15.9265 |
| 16.14    | 1148.403 | 15.68    | 1148.403 | 16.13614 | 1148.403 | 15.93747 | 1148.403 | 15.93   |
| 16.14762 | 1148.403 | 15.68771 | 1148.403 | 16.14    | 1148.403 | 15.94    | 1148.403 | 15.9365 |

|          |          |          |          |          |          |          |          |         |
|----------|----------|----------|----------|----------|----------|----------|----------|---------|
| 16.15    | 1148.403 | 15.69    | 1148.403 | 16.14614 | 1148.403 | 15.94747 | 1148.403 | 15.94   |
| 16.15762 | 1148.403 | 15.69771 | 1148.403 | 16.15    | 1148.403 | 15.95    | 1148.403 | 15.9465 |
| 16.16    | 1148.403 | 15.7     | 1148.403 | 16.15614 | 1148.403 | 15.95747 | 1148.403 | 15.95   |
| 16.16762 | 1148.403 | 15.70771 | 1148.403 | 16.16    | 1148.403 | 15.96    | 1148.403 | 15.9565 |
| 16.17    | 1148.403 | 15.71    | 1148.403 | 16.16614 | 1148.403 | 15.96747 | 1148.403 | 15.96   |
| 16.17762 | 1148.403 | 15.71771 | 1148.403 | 16.17    | 1148.403 | 15.97    | 1148.403 | 15.9665 |
| 16.18    | 1148.403 | 15.72    | 1148.403 | 16.17614 | 1148.403 | 15.97747 | 1148.403 | 15.97   |
| 16.18762 | 1148.403 | 15.72771 | 1148.403 | 16.18    | 1148.403 | 15.98    | 1148.403 | 15.9765 |
| 16.19    | 1148.403 | 15.73    | 1148.403 | 16.18614 | 1148.403 | 15.98747 | 1148.403 | 15.98   |
| 16.19762 | 1148.403 | 15.73771 | 1148.403 | 16.19    | 1148.403 | 15.99    | 1148.403 | 15.9865 |
| 16.2     | 1148.403 | 15.74    | 1148.403 | 16.19614 | 1148.403 | 15.99747 | 1148.403 | 15.99   |
| 16.20762 | 1148.403 | 15.74771 | 1148.403 | 16.2     | 1148.403 | 16       | 1148.403 | 15.9965 |
| 16.21    | 1148.403 | 15.75    | 1148.403 | 16.20614 | 1148.403 | 16.00747 | 1148.403 | 16      |
| 16.21762 | 1148.403 | 15.75771 | 1148.403 | 16.21    | 1148.403 | 16.01    | 1148.403 | 16.0065 |
| 16.22    | 1148.403 | 15.76    | 1148.403 | 16.21614 | 1148.403 | 16.01747 | 1148.403 | 16.01   |
| 16.22762 | 1148.403 | 15.76771 | 1148.403 | 16.22    | 1148.403 | 16.02    | 1148.403 | 16.0165 |
| 16.23    | 1148.403 | 15.77    | 1148.403 | 16.22614 | 1148.403 | 16.02747 | 1148.403 | 16.02   |
| 16.23762 | 1148.403 | 15.77771 | 1148.403 | 16.23    | 1148.403 | 16.03    | 1148.403 | 16.0265 |
| 16.24    | 1148.403 | 15.78    | 1148.403 | 16.23614 | 1148.403 | 16.03747 | 1148.403 | 16.03   |
| 16.24762 | 1148.403 | 15.78771 | 1148.403 | 16.24    | 1148.403 | 16.04    | 1148.403 | 16.0365 |
| 16.25    | 1148.403 | 15.79    | 1148.403 | 16.24614 | 1148.403 | 16.04747 | 1148.403 | 16.04   |
| 16.25762 | 1148.403 | 15.79771 | 1148.403 | 16.25    | 1148.403 | 16.05    | 1148.403 | 16.0465 |
| 16.26    | 1148.403 | 15.8     | 1148.403 | 16.25614 | 1148.403 | 16.05747 | 1148.403 | 16.05   |
| 16.26762 | 1148.403 | 15.80771 | 1148.403 | 16.26    | 1148.403 | 16.06    | 1148.403 | 16.0565 |
| 16.27    | 1148.403 | 15.81    | 1148.403 | 16.26614 | 1148.403 | 16.06747 | 1148.403 | 16.06   |
| 16.27762 | 1148.403 | 15.81771 | 1148.403 | 16.27    | 1148.403 | 16.07    | 1148.403 | 16.0665 |
| 16.28    | 1148.403 | 15.82    | 1148.403 | 16.27614 | 1148.403 | 16.07747 | 1148.403 | 16.07   |
| 16.28762 | 1148.403 | 15.82771 | 1148.403 | 16.28    | 1148.403 | 16.08    | 1148.403 | 16.0765 |
| 16.29    | 1148.403 | 15.83    | 1148.403 | 16.28614 | 1148.403 | 16.08747 | 1148.403 | 16.08   |
| 16.29762 | 1148.403 | 15.83771 | 1148.403 | 16.29    | 1148.403 | 16.09    | 1148.403 | 16.0865 |
| 16.3     | 1148.403 | 15.84    | 1148.403 | 16.29614 | 1148.403 | 16.09747 | 1148.403 | 16.09   |
| 16.30762 | 1148.403 | 15.84771 | 1148.403 | 16.3     | 1148.403 | 16.1     | 1148.403 | 16.0965 |
| 16.31    | 1148.403 | 15.85    | 1148.403 | 16.30614 | 1148.403 | 16.10747 | 1148.403 | 16.1    |
| 16.31762 | 1148.403 | 15.85771 | 1148.403 | 16.31    | 1148.403 | 16.11    | 1148.403 | 16.1065 |
| 16.32    | 1148.403 | 15.86    | 1148.403 | 16.31614 | 1148.403 | 16.11747 | 1148.403 | 16.11   |
| 16.32762 | 1148.403 | 15.86771 | 1148.403 | 16.32    | 1148.403 | 16.12    | 1148.403 | 16.1165 |
| 16.33    | 1148.403 | 15.87    | 1148.403 | 16.32614 | 1148.403 | 16.12747 | 1148.403 | 16.12   |
| 16.33762 | 1148.403 | 15.87771 | 1148.403 | 16.33    | 1148.403 | 16.13    | 1148.403 | 16.1265 |
| 16.34    | 1148.403 | 15.88    | 1148.403 | 16.33614 | 1148.403 | 16.13747 | 1148.403 | 16.13   |
| 16.34762 | 1148.403 | 15.88771 | 1148.403 | 16.34    | 1148.403 | 16.14    | 1148.403 | 16.1365 |
| 16.35    | 1148.403 | 15.89    | 1148.403 | 16.34614 | 1148.403 | 16.14747 | 1148.403 | 16.14   |
| 16.35762 | 1148.403 | 15.89771 | 1148.403 | 16.35    | 1148.403 | 16.15    | 1148.403 | 16.1465 |
| 16.36    | 1148.403 | 15.9     | 1148.403 | 16.35614 | 1148.403 | 16.15747 | 1148.403 | 16.15   |
| 16.36762 | 1148.403 | 15.90771 | 1148.403 | 16.36    | 1148.403 | 16.16    | 1148.403 | 16.1565 |
| 16.37    | 1148.403 | 15.91    | 1148.403 | 16.36614 | 1148.403 | 16.16747 | 1148.403 | 16.16   |
| 16.37762 | 1148.403 | 15.91771 | 1148.403 | 16.37    | 1148.403 | 16.17    | 1148.403 | 16.1665 |
| 16.38    | 1148.403 | 15.92    | 1148.403 | 16.37614 | 1148.403 | 16.17747 | 1148.403 | 16.17   |

|          |          |          |          |          |          |          |          |         |
|----------|----------|----------|----------|----------|----------|----------|----------|---------|
| 16.38762 | 1148.403 | 15.92771 | 1148.403 | 16.38    | 1148.403 | 16.18    | 1148.403 | 16.1765 |
| 16.39    | 1148.403 | 15.93    | 1148.403 | 16.38614 | 1148.403 | 16.18747 | 1148.403 | 16.18   |
| 16.39762 | 1148.403 | 15.93771 | 1148.403 | 16.39    | 1148.403 | 16.19    | 1148.403 | 16.1865 |
| 16.4     | 1148.403 | 15.94    | 1148.403 | 16.39614 | 1148.403 | 16.19747 | 1148.403 | 16.19   |
| 16.40762 | 1148.403 | 15.94771 | 1148.403 | 16.4     | 1148.403 | 16.2     | 1148.403 | 16.1965 |
| 16.41    | 1148.403 | 15.95    | 1148.403 | 16.40614 | 1148.403 | 16.20747 | 1148.403 | 16.2    |
| 16.41762 | 1148.403 | 15.95771 | 1148.403 | 16.41    | 1148.403 | 16.21    | 1148.403 | 16.2065 |
| 16.42    | 1148.403 | 15.96    | 1148.403 | 16.41614 | 1148.403 | 16.21747 | 1148.403 | 16.21   |
| 16.42762 | 1148.403 | 15.96771 | 1148.403 | 16.42    | 1148.403 | 16.22    | 1148.403 | 16.2165 |
| 16.43    | 1148.403 | 15.97    | 1148.403 | 16.42614 | 1148.403 | 16.22747 | 1148.403 | 16.22   |
| 16.43762 | 1148.403 | 15.97771 | 1148.403 | 16.43    | 1148.403 | 16.23    | 1148.403 | 16.2265 |
| 16.44    | 1148.403 | 15.98    | 1148.403 | 16.43614 | 1148.403 | 16.23747 | 1148.403 | 16.23   |
| 16.44762 | 1148.403 | 15.98771 | 1148.403 | 16.44    | 1148.403 | 16.24    | 1148.403 | 16.2365 |
| 16.45    | 1148.403 | 15.99    | 1148.403 | 16.44614 | 1148.403 | 16.24747 | 1148.403 | 16.24   |
| 16.45762 | 1148.403 | 15.99771 | 1148.403 | 16.45    | 1148.403 | 16.25    | 1148.403 | 16.2465 |
| 16.46    | 1148.403 | 16       | 1148.403 | 16.45614 | 1148.403 | 16.25747 | 1148.403 | 16.25   |
| 16.46762 | 1148.403 | 16.00771 | 1148.403 | 16.46    | 1148.403 | 16.26    | 1148.403 | 16.2565 |
| 16.47    | 1148.403 | 16.01    | 1148.403 | 16.46614 | 1148.403 | 16.26747 | 1148.403 | 16.26   |
| 16.47762 | 1148.403 | 16.01771 | 1148.403 | 16.47    | 1148.403 | 16.27    | 1148.403 | 16.2665 |
| 16.48    | 1148.403 | 16.02    | 1148.403 | 16.47614 | 1148.403 | 16.27747 | 1148.403 | 16.27   |
| 16.48762 | 1148.403 | 16.02771 | 1148.403 | 16.48    | 1148.403 | 16.28    | 1148.403 | 16.2765 |
| 16.49    | 1148.403 | 16.03    | 1148.403 | 16.48614 | 1148.403 | 16.28747 | 1148.403 | 16.28   |
| 16.49762 | 1148.403 | 16.03771 | 1148.403 | 16.49    | 1148.403 | 16.29    | 1148.403 | 16.2865 |
| 16.5     | 1148.403 | 16.04    | 1148.403 | 16.49614 | 1148.403 | 16.29747 | 1148.403 | 16.29   |
| 16.50762 | 1148.403 | 16.04771 | 1148.403 | 16.5     | 1148.403 | 16.3     | 1148.403 | 16.2965 |
| 16.51    | 1148.403 | 16.05    | 1148.403 | 16.50614 | 1148.403 | 16.30747 | 1148.403 | 16.3    |
| 16.51762 | 1148.403 | 16.05771 | 1148.403 | 16.51    | 1148.403 | 16.31    | 1148.403 | 16.3065 |
| 16.52    | 1148.403 | 16.06    | 1148.403 | 16.51614 | 1148.403 | 16.31747 | 1148.403 | 16.31   |
| 16.52762 | 1148.403 | 16.06771 | 1148.403 | 16.52    | 1148.403 | 16.32    | 1148.403 | 16.3165 |
| 16.53    | 1148.403 | 16.07    | 1148.403 | 16.52614 | 1148.403 | 16.32747 | 1148.403 | 16.32   |
| 16.53762 | 1148.403 | 16.07771 | 1148.403 | 16.53    | 1148.403 | 16.33    | 1148.403 | 16.3265 |
| 16.54    | 1148.403 | 16.08    | 1148.403 | 16.53614 | 1148.403 | 16.33747 | 1148.403 | 16.33   |
| 16.54762 | 1148.403 | 16.08771 | 1148.403 | 16.54    | 1148.403 | 16.34    | 1148.403 | 16.3365 |
| 16.55    | 1148.403 | 16.09    | 1148.403 | 16.54614 | 1148.403 | 16.34747 | 1148.403 | 16.34   |
| 16.55762 | 1148.403 | 16.09771 | 1148.403 | 16.55    | 1148.403 | 16.35    | 1148.403 | 16.3465 |
| 16.56    | 1148.403 | 16.1     | 1148.403 | 16.55614 | 1148.403 | 16.35747 | 1148.403 | 16.35   |
| 16.56762 | 1148.403 | 16.10771 | 1148.403 | 16.56    | 1148.403 | 16.36    | 1148.403 | 16.3565 |
| 16.57    | 1148.403 | 16.11    | 1148.403 | 16.56614 | 1148.403 | 16.36747 | 1148.403 | 16.36   |
| 16.57762 | 1148.403 | 16.11771 | 1148.403 | 16.57    | 1148.403 | 16.37    | 1148.403 | 16.3665 |
| 16.58    | 1148.403 | 16.12    | 1148.403 | 16.57614 | 1148.403 | 16.37747 | 1148.403 | 16.37   |
| 16.58762 | 1148.403 | 16.12771 | 1148.403 | 16.58    | 1148.403 | 16.38    | 1148.403 | 16.3765 |
| 16.59    | 1148.403 | 16.13    | 1148.403 | 16.58614 | 1148.403 | 16.38747 | 1148.403 | 16.38   |
| 16.59762 | 1148.403 | 16.13771 | 1148.403 | 16.59    | 1148.403 | 16.39    | 1148.403 | 16.3865 |
| 16.6     | 1148.403 | 16.14    | 1148.403 | 16.59614 | 1148.403 | 16.39747 | 1148.403 | 16.39   |
| 16.60762 | 1148.403 | 16.14771 | 1148.403 | 16.6     | 1148.403 | 16.4     | 1148.403 | 16.3965 |
| 16.61    | 1148.403 | 16.15    | 1148.403 | 16.60614 | 1148.403 | 16.40747 | 1148.403 | 16.4    |
| 16.61762 | 1148.403 | 16.15771 | 1148.403 | 16.61    | 1148.403 | 16.41    | 1148.403 | 16.4065 |

|          |          |          |          |          |          |          |          |         |
|----------|----------|----------|----------|----------|----------|----------|----------|---------|
| 16.62    | 1148.403 | 16.16    | 1148.403 | 16.61614 | 1148.403 | 16.41747 | 1148.403 | 16.41   |
| 16.62762 | 1148.403 | 16.16771 | 1148.403 | 16.62    | 1148.403 | 16.42    | 1148.403 | 16.4165 |
| 16.63    | 1148.403 | 16.17    | 1148.403 | 16.62614 | 1148.403 | 16.42747 | 1148.403 | 16.42   |
| 16.63762 | 1148.403 | 16.17771 | 1148.403 | 16.63    | 1148.403 | 16.43    | 1148.403 | 16.4265 |
| 16.64    | 1148.403 | 16.18    | 1148.403 | 16.63614 | 1148.403 | 16.43747 | 1148.403 | 16.43   |
| 16.64762 | 1148.403 | 16.18771 | 1148.403 | 16.64    | 1148.403 | 16.44    | 1148.403 | 16.4365 |
| 16.65    | 1148.403 | 16.19    | 1148.403 | 16.64614 | 1148.403 | 16.44747 | 1148.403 | 16.44   |
| 16.65762 | 1148.403 | 16.19771 | 1148.403 | 16.65    | 1148.403 | 16.45    | 1148.403 | 16.4465 |
| 16.66    | 1148.403 | 16.2     | 1148.403 | 16.65614 | 1148.403 | 16.45747 | 1148.403 | 16.45   |
| 16.66762 | 1148.403 | 16.20771 | 1148.403 | 16.66    | 1148.403 | 16.46    | 1148.403 | 16.4565 |
| 16.67    | 1148.403 | 16.21    | 1148.403 | 16.66614 | 1148.403 | 16.46747 | 1148.403 | 16.46   |
| 16.67762 | 1148.403 | 16.21771 | 1148.403 | 16.67    | 1148.403 | 16.47    | 1148.403 | 16.4665 |
| 16.68    | 1148.403 | 16.22    | 1148.403 | 16.67614 | 1148.403 | 16.47747 | 1148.403 | 16.47   |
| 16.68762 | 1148.403 | 16.22771 | 1148.403 | 16.68    | 1148.403 | 16.48    | 1148.403 | 16.4765 |
| 16.69    | 1148.403 | 16.23    | 1148.403 | 16.68614 | 1148.403 | 16.48747 | 1148.403 | 16.48   |
| 16.69762 | 1148.403 | 16.23771 | 1148.403 | 16.69    | 1148.403 | 16.49    | 1148.403 | 16.4865 |
| 16.7     | 1148.403 | 16.24    | 1148.403 | 16.69614 | 1148.403 | 16.49747 | 1148.403 | 16.49   |
| 16.70762 | 1148.403 | 16.24771 | 1148.403 | 16.7     | 1148.403 | 16.5     | 1148.403 | 16.4965 |
| 16.71    | 1148.403 | 16.25    | 1148.403 | 16.70614 | 1148.403 | 16.50747 | 1148.403 | 16.5    |
| 16.71762 | 1148.403 | 16.25771 | 1148.403 | 16.71    | 1148.403 | 16.51    | 1148.403 | 16.5065 |
| 16.72    | 1148.403 | 16.26    | 1148.403 | 16.71614 | 1148.403 | 16.51747 | 1148.403 | 16.51   |
| 16.72762 | 1148.403 | 16.26771 | 1148.403 | 16.72    | 1148.403 | 16.52    | 1148.403 | 16.5165 |
| 16.73    | 1148.403 | 16.27    | 1148.403 | 16.72614 | 1148.403 | 16.52747 | 1148.403 | 16.52   |
| 16.73762 | 1148.403 | 16.27771 | 1148.403 | 16.73    | 1148.403 | 16.53    | 1148.403 | 16.5265 |
| 16.74    | 1148.403 | 16.28    | 1148.403 | 16.73614 | 1148.403 | 16.53747 | 1148.403 | 16.53   |
| 16.74762 | 1148.403 | 16.28771 | 1148.403 | 16.74    | 1148.403 | 16.54    | 1148.403 | 16.5365 |
| 16.75    | 1148.403 | 16.29    | 1148.403 | 16.74614 | 1148.403 | 16.54747 | 1148.403 | 16.54   |
| 16.75762 | 1148.403 | 16.29771 | 1148.403 | 16.75    | 1148.403 | 16.55    | 1148.403 | 16.5465 |
| 16.76    | 1148.403 | 16.3     | 1148.403 | 16.75614 | 1148.403 | 16.55747 | 1148.403 | 16.55   |
| 16.76762 | 1148.403 | 16.30771 | 1148.403 | 16.76    | 1148.403 | 16.56    | 1148.403 | 16.5565 |
| 16.77    | 1148.403 | 16.31    | 1148.403 | 16.76614 | 1148.403 | 16.56747 | 1148.403 | 16.56   |
| 16.77762 | 1148.403 | 16.31771 | 1148.403 | 16.77    | 1148.403 | 16.57    | 1148.403 | 16.5665 |
| 16.78    | 1148.403 | 16.32    | 1148.403 | 16.77614 | 1148.403 | 16.57747 | 1148.403 | 16.57   |
| 16.78762 | 1148.403 | 16.32771 | 1148.403 | 16.78    | 1148.403 | 16.58    | 1148.403 | 16.5765 |
| 16.79    | 1148.403 | 16.33    | 1148.403 | 16.78614 | 1148.403 | 16.58747 | 1148.403 | 16.58   |
| 16.79762 | 1148.403 | 16.33771 | 1148.403 | 16.79    | 1148.403 | 16.59    | 1148.403 | 16.5865 |
| 16.8     | 1148.403 | 16.34    | 1148.403 | 16.79614 | 1148.403 | 16.59747 | 1148.403 | 16.59   |
| 16.80762 | 1148.403 | 16.34771 | 1148.403 | 16.8     | 1148.403 | 16.6     | 1148.403 | 16.5965 |
| 16.81    | 1148.403 | 16.35    | 1148.403 | 16.80614 | 1148.403 | 16.60747 | 1148.403 | 16.6    |
| 16.81762 | 1148.403 | 16.35771 | 1148.403 | 16.81    | 1148.403 | 16.61    | 1148.403 | 16.6065 |
| 16.82    | 1148.403 | 16.36    | 1148.403 | 16.81614 | 1148.403 | 16.61747 | 1148.403 | 16.61   |
| 16.82762 | 1148.403 | 16.36771 | 1148.403 | 16.82    | 1148.403 | 16.62    | 1148.403 | 16.6165 |
| 16.83    | 1148.403 | 16.37    | 1148.403 | 16.82614 | 1148.403 | 16.62747 | 1148.403 | 16.62   |
| 16.83762 | 1148.403 | 16.37771 | 1148.403 | 16.83    | 1148.403 | 16.63    | 1148.403 | 16.6265 |
| 16.84    | 1148.403 | 16.38    | 1148.403 | 16.83614 | 1148.403 | 16.63747 | 1148.403 | 16.63   |
| 16.84762 | 1148.403 | 16.38771 | 1148.403 | 16.84    | 1148.403 | 16.64    | 1148.403 | 16.6365 |
| 16.85    | 1148.403 | 16.39    | 1148.403 | 16.84614 | 1148.403 | 16.64747 | 1148.403 | 16.64   |

|          |          |          |          |          |          |          |          |         |
|----------|----------|----------|----------|----------|----------|----------|----------|---------|
| 16.85762 | 1148.403 | 16.39771 | 1148.403 | 16.85    | 1148.403 | 16.65    | 1148.403 | 16.6465 |
| 16.86    | 1148.403 | 16.4     | 1148.403 | 16.85614 | 1148.403 | 16.65747 | 1148.403 | 16.65   |
| 16.86762 | 1148.403 | 16.40771 | 1148.403 | 16.86    | 1148.403 | 16.66    | 1148.403 | 16.6565 |
| 16.87    | 1148.403 | 16.41    | 1148.403 | 16.86614 | 1148.403 | 16.66747 | 1148.403 | 16.66   |
| 16.87762 | 1148.403 | 16.41771 | 1148.403 | 16.87    | 1148.403 | 16.67    | 1148.403 | 16.6665 |
| 16.88    | 1148.403 | 16.42    | 1148.403 | 16.87614 | 1148.403 | 16.67747 | 1148.403 | 16.67   |
| 16.88762 | 1148.403 | 16.42771 | 1148.403 | 16.88    | 1148.403 | 16.68    | 1148.403 | 16.6765 |
| 16.89    | 1148.403 | 16.43    | 1148.403 | 16.88614 | 1148.403 | 16.68747 | 1148.403 | 16.68   |
| 16.89762 | 1148.403 | 16.43771 | 1148.403 | 16.89    | 1148.403 | 16.69    | 1148.403 | 16.6865 |
| 16.9     | 1148.403 | 16.44    | 1148.403 | 16.89614 | 1148.403 | 16.69747 | 1148.403 | 16.69   |
| 16.90762 | 1148.403 | 16.44771 | 1148.403 | 16.9     | 1148.403 | 16.7     | 1148.403 | 16.6965 |
| 16.91    | 1148.403 | 16.45    | 1148.403 | 16.90614 | 1148.403 | 16.70747 | 1148.403 | 16.7    |
| 16.91762 | 1148.403 | 16.45771 | 1148.403 | 16.91    | 1148.403 | 16.71    | 1148.403 | 16.7065 |
| 16.92    | 1148.403 | 16.46    | 1148.403 | 16.91614 | 1148.403 | 16.71747 | 1148.403 | 16.71   |
| 16.92762 | 1148.403 | 16.46771 | 1148.403 | 16.92    | 1148.403 | 16.72    | 1148.403 | 16.7165 |
| 16.93    | 1148.403 | 16.47    | 1148.403 | 16.92614 | 1148.403 | 16.72747 | 1148.403 | 16.72   |
| 16.93762 | 1148.403 | 16.47771 | 1148.403 | 16.93    | 1148.403 | 16.73    | 1148.403 | 16.7265 |
| 16.94    | 1148.403 | 16.48    | 1148.403 | 16.93614 | 1148.403 | 16.73747 | 1148.403 | 16.73   |
| 16.94762 | 1148.403 | 16.48771 | 1148.403 | 16.94    | 1148.403 | 16.74    | 1148.403 | 16.7365 |
| 16.95    | 1148.403 | 16.49    | 1148.403 | 16.94614 | 1148.403 | 16.74747 | 1148.403 | 16.74   |
| 16.95762 | 1148.403 | 16.49771 | 1148.403 | 16.95    | 1148.403 | 16.75    | 1148.403 | 16.7465 |
| 16.96    | 1148.403 | 16.5     | 1148.403 | 16.95614 | 1148.403 | 16.75747 | 1148.403 | 16.75   |
| 16.96762 | 1148.403 | 16.50771 | 1148.403 | 16.96    | 1148.403 | 16.76    | 1148.403 | 16.7565 |
| 16.97    | 1148.403 | 16.51    | 1148.403 | 16.96614 | 1148.403 | 16.76747 | 1148.403 | 16.76   |
| 16.97762 | 1148.403 | 16.51771 | 1148.403 | 16.97    | 1148.403 | 16.77    | 1148.403 | 16.7665 |
| 16.98    | 1148.403 | 16.52    | 1148.403 | 16.97614 | 1148.403 | 16.77747 | 1148.403 | 16.77   |
| 16.98762 | 1148.403 | 16.52771 | 1148.403 | 16.98    | 1148.403 | 16.78    | 1148.403 | 16.7765 |
| 16.99    | 1148.403 | 16.53    | 1148.403 | 16.98614 | 1148.403 | 16.78747 | 1148.403 | 16.78   |
| 16.99762 | 1148.403 | 16.53771 | 1148.403 | 16.99    | 1148.403 | 16.79    | 1148.403 | 16.7865 |
| 17       | 1148.403 | 16.54    | 1148.403 | 16.99614 | 1148.403 | 16.79747 | 1148.403 | 16.79   |
| 17.00762 | 1148.403 | 16.54771 | 1148.403 | 17       | 1148.403 | 16.8     | 1148.403 | 16.7965 |
| 17.01    | 1148.403 | 16.55    | 1148.403 | 17.00614 | 1148.403 | 16.80747 | 1148.403 | 16.8    |
| 17.01762 | 1148.403 | 16.55771 | 1148.403 | 17.01    | 1148.403 | 16.81    | 1148.403 | 16.8065 |
| 17.02    | 1148.403 | 16.56    | 1148.403 | 17.01614 | 1148.403 | 16.81747 | 1148.403 | 16.81   |
| 17.02762 | 1148.403 | 16.56771 | 1148.403 | 17.02    | 1148.403 | 16.82    | 1148.403 | 16.8165 |
| 17.03    | 1148.403 | 16.57    | 1148.403 | 17.02614 | 1148.403 | 16.82747 | 1148.403 | 16.82   |
| 17.03762 | 1148.403 | 16.57771 | 1148.403 | 17.03    | 1148.403 | 16.83    | 1148.403 | 16.8265 |
| 17.04    | 1148.403 | 16.58    | 1148.403 | 17.03614 | 1148.403 | 16.83747 | 1148.403 | 16.83   |
| 17.04762 | 1148.403 | 16.58771 | 1148.403 | 17.04    | 1148.403 | 16.84    | 1148.403 | 16.8365 |
| 17.05    | 1148.403 | 16.59    | 1148.403 | 17.04614 | 1148.403 | 16.84747 | 1148.403 | 16.84   |
| 17.05762 | 1148.403 | 16.59771 | 1148.403 | 17.05    | 1148.403 | 16.85    | 1148.403 | 16.8465 |
| 17.06    | 1148.403 | 16.6     | 1148.403 | 17.05614 | 1148.403 | 16.85747 | 1148.403 | 16.85   |
| 17.06762 | 1148.403 | 16.60771 | 1148.403 | 17.06    | 1148.403 | 16.86    | 1148.403 | 16.8565 |
| 17.07    | 1148.403 | 16.61    | 1148.403 | 17.06614 | 1148.403 | 16.86747 | 1148.403 | 16.86   |
| 17.07762 | 1148.403 | 16.61771 | 1148.403 | 17.07    | 1148.403 | 16.87    | 1148.403 | 16.8665 |
| 17.08    | 1148.403 | 16.62    | 1148.403 | 17.07614 | 1148.403 | 16.87747 | 1148.403 | 16.87   |
| 17.08762 | 1148.403 | 16.62771 | 1148.403 | 17.08    | 1148.403 | 16.88    | 1148.403 | 16.8765 |



|          |          |          |          |          |          |          |          |         |
|----------|----------|----------|----------|----------|----------|----------|----------|---------|
| 17.09    | 1148.403 | 16.63    | 1148.403 | 17.08614 | 1148.403 | 16.88747 | 1148.403 | 16.88   |
| 17.09762 | 1148.403 | 16.63771 | 1148.403 | 17.09    | 1148.403 | 16.89    | 1148.403 | 16.8865 |
| 17.1     | 1148.403 | 16.64    | 1148.403 | 17.09614 | 1148.403 | 16.89747 | 1148.403 | 16.89   |
| 17.10762 | 1148.403 | 16.64771 | 1148.403 | 17.1     | 1148.403 | 16.9     | 1148.403 | 16.8965 |
| 17.11    | 1148.403 | 16.65    | 1148.403 | 17.10614 | 1148.403 | 16.90747 | 1148.403 | 16.9    |
| 17.11762 | 1148.403 | 16.65771 | 1148.403 | 17.11    | 1148.403 | 16.91    | 1148.403 | 16.9065 |
| 17.12    | 1148.403 | 16.66    | 1148.403 | 17.11614 | 1148.403 | 16.91747 | 1148.403 | 16.91   |
| 17.12762 | 1148.403 | 16.66771 | 1148.403 | 17.12    | 1148.403 | 16.92    | 1148.403 | 16.9165 |
| 17.13    | 1148.403 | 16.67    | 1148.403 | 17.12614 | 1148.403 | 16.92747 | 1148.403 | 16.92   |
| 17.13762 | 1148.403 | 16.67771 | 1148.403 | 17.13    | 1148.403 | 16.93    | 1148.403 | 16.9265 |
| 17.14    | 1148.403 | 16.68    | 1148.403 | 17.13614 | 1148.403 | 16.93747 | 1148.403 | 16.93   |
| 17.14762 | 1148.403 | 16.68771 | 1148.403 | 17.14    | 1148.403 | 16.94    | 1148.403 | 16.9365 |
| 17.15    | 1148.403 | 16.69    | 1148.403 | 17.14614 | 1148.403 | 16.94747 | 1148.403 | 16.94   |
| 17.15762 | 1148.403 | 16.69771 | 1148.403 | 17.15    | 1148.403 | 16.95    | 1148.403 | 16.9465 |
| 17.16    | 1148.403 | 16.7     | 1148.403 | 17.15614 | 1148.403 | 16.95747 | 1148.403 | 16.95   |
| 17.16762 | 1148.403 | 16.70771 | 1148.403 | 17.16    | 1148.403 | 16.96    | 1148.403 | 16.9565 |
| 17.17    | 1148.403 | 16.71    | 1148.403 | 17.16614 | 1148.403 | 16.96747 | 1148.403 | 16.96   |
| 17.17762 | 1148.403 | 16.71771 | 1148.403 | 17.17    | 1148.403 | 16.97    | 1148.403 | 16.9665 |
| 17.18    | 1148.403 | 16.72    | 1148.403 | 17.17614 | 1148.403 | 16.97747 | 1148.403 | 16.97   |
| 17.18762 | 1148.403 | 16.72771 | 1148.403 | 17.18    | 1148.403 | 16.98    | 1148.403 | 16.9765 |
| 17.19    | 1148.403 | 16.73    | 1148.403 | 17.18614 | 1148.403 | 16.98747 | 1148.403 | 16.98   |
| 17.19762 | 1148.403 | 16.73771 | 1148.403 | 17.19    | 1148.403 | 16.99    | 1148.403 | 16.9865 |
| 17.2     | 1148.403 | 16.74    | 1148.403 | 17.19614 | 1148.403 | 16.99747 | 1148.403 | 16.99   |
| 17.20762 | 1148.403 | 16.74771 | 1148.403 | 17.2     | 1148.403 | 17       | 1148.403 | 16.9965 |
| 17.21    | 1148.403 | 16.75    | 1148.403 | 17.20614 | 1148.403 | 17.00747 | 1148.403 | 17      |
| 17.21762 | 1148.403 | 16.75771 | 1148.403 | 17.21    | 1148.403 | 17.01    | 1148.403 | 17.0065 |
| 17.22    | 1148.403 | 16.76    | 1148.403 | 17.21614 | 1148.403 | 17.01747 | 1148.403 | 17.01   |
| 17.22762 | 1148.403 | 16.76771 | 1148.403 | 17.22    | 1148.403 | 17.02    | 1148.403 | 17.0165 |
| 17.23    | 1148.403 | 16.77    | 1148.403 | 17.22614 | 1148.403 | 17.02747 | 1148.403 | 17.02   |
| 17.23762 | 1148.403 | 16.77771 | 1148.403 | 17.23    | 1148.403 | 17.03    | 1148.403 | 17.0265 |
| 17.24    | 1148.403 | 16.78    | 1148.403 | 17.23614 | 1148.403 | 17.03747 | 1148.403 | 17.03   |
| 17.24762 | 1148.403 | 16.78771 | 1148.403 | 17.24    | 1148.403 | 17.04    | 1148.403 | 17.0365 |
| 17.25    | 1148.403 | 16.79    | 1148.403 | 17.24614 | 1148.403 | 17.04747 | 1148.403 | 17.04   |
| 17.25762 | 1148.403 | 16.79771 | 1148.403 | 17.25    | 1148.403 | 17.05    | 1148.403 | 17.0465 |
| 17.26    | 1148.403 | 16.8     | 1148.403 | 17.25614 | 1148.403 | 17.05747 | 1148.403 | 17.05   |
| 17.26762 | 1148.403 | 16.80771 | 1148.403 | 17.26    | 1148.403 | 17.06    | 1148.403 | 17.0565 |
| 17.27    | 1148.403 | 16.81    | 1148.403 | 17.26614 | 1148.403 | 17.06747 | 1148.403 | 17.06   |
| 17.27762 | 1148.403 | 16.81771 | 1148.403 | 17.27    | 1148.403 | 17.07    | 1148.403 | 17.0665 |
| 17.28    | 1148.403 | 16.82    | 1148.403 | 17.27614 | 1148.403 | 17.07747 | 1148.403 | 17.07   |
| 17.28762 | 1148.403 | 16.82771 | 1148.403 | 17.28    | 1148.403 | 17.08    | 1148.403 | 17.0765 |
| 17.29    | 1148.403 | 16.83    | 1148.403 | 17.28614 | 1148.403 | 17.08747 | 1148.403 | 17.08   |
| 17.29762 | 1148.403 | 16.83771 | 1148.403 | 17.29    | 1148.403 | 17.09    | 1148.403 | 17.0865 |
| 17.3     | 1148.403 | 16.84    | 1148.403 | 17.29614 | 1148.403 | 17.09747 | 1148.403 | 17.09   |
| 17.30762 | 1148.403 | 16.84771 | 1148.403 | 17.3     | 1148.403 | 17.1     | 1148.403 | 17.0965 |
| 17.31    | 1148.403 | 16.85    | 1148.403 | 17.30614 | 1148.403 | 17.10747 | 1148.403 | 17.1    |
| 17.31762 | 1148.403 | 16.85771 | 1148.403 | 17.31    | 1148.403 | 17.11    | 1148.403 | 17.1065 |
| 17.32    | 1148.403 | 16.86    | 1148.403 | 17.31614 | 1148.403 | 17.11747 | 1148.403 | 17.11   |

|          |          |          |          |          |          |          |          |         |
|----------|----------|----------|----------|----------|----------|----------|----------|---------|
| 17.32762 | 1148.403 | 16.86771 | 1148.403 | 17.32    | 1148.403 | 17.12    | 1148.403 | 17.1165 |
| 17.33    | 1148.403 | 16.87    | 1148.403 | 17.32614 | 1148.403 | 17.12747 | 1148.403 | 17.12   |
| 17.33762 | 1148.403 | 16.87771 | 1148.403 | 17.33    | 1148.403 | 17.13    | 1148.403 | 17.1265 |
| 17.34    | 1148.403 | 16.88    | 1148.403 | 17.33614 | 1148.403 | 17.13747 | 1148.403 | 17.13   |
| 17.34762 | 1148.403 | 16.88771 | 1148.403 | 17.34    | 1148.403 | 17.14    | 1148.403 | 17.1365 |
| 17.35    | 1148.403 | 16.89    | 1148.403 | 17.34614 | 1148.403 | 17.14747 | 1148.403 | 17.14   |
| 17.35762 | 1148.403 | 16.89771 | 1148.403 | 17.35    | 1148.403 | 17.15    | 1148.403 | 17.1465 |
| 17.36    | 1148.403 | 16.9     | 1148.403 | 17.35614 | 1148.403 | 17.15747 | 1148.403 | 17.15   |
| 17.36762 | 1148.403 | 16.90771 | 1148.403 | 17.36    | 1148.403 | 17.16    | 1148.403 | 17.1565 |
| 17.37    | 1148.403 | 16.91    | 1148.403 | 17.36614 | 1148.403 | 17.16747 | 1148.403 | 17.16   |
| 17.37762 | 1148.403 | 16.91771 | 1148.403 | 17.37    | 1148.403 | 17.17    | 1148.403 | 17.1665 |
| 17.38    | 1148.403 | 16.92    | 1148.403 | 17.37614 | 1148.403 | 17.17747 | 1148.403 | 17.17   |
| 17.38762 | 1148.403 | 16.92771 | 1148.403 | 17.38    | 1148.403 | 17.18    | 1148.403 | 17.1765 |
| 17.39    | 1148.403 | 16.93    | 1148.403 | 17.38614 | 1148.403 | 17.18747 | 1148.403 | 17.18   |
| 17.39762 | 1148.403 | 16.93771 | 1148.403 | 17.39    | 1148.403 | 17.19    | 1148.403 | 17.1865 |
| 17.4     | 1148.403 | 16.94    | 1148.403 | 17.39614 | 1148.403 | 17.19747 | 1148.403 | 17.19   |
| 17.40762 | 1148.403 | 16.94771 | 1148.403 | 17.4     | 1148.403 | 17.2     | 1148.403 | 17.1965 |
| 17.41    | 1148.403 | 16.95    | 1148.403 | 17.40614 | 1148.403 | 17.20747 | 1148.403 | 17.2    |
| 17.41762 | 1148.403 | 16.95771 | 1148.403 | 17.41    | 1148.403 | 17.21    | 1148.403 | 17.2065 |
| 17.42    | 1148.403 | 16.96    | 1148.403 | 17.41614 | 1148.403 | 17.21747 | 1148.403 | 17.21   |
| 17.42762 | 1148.403 | 16.96771 | 1148.403 | 17.42    | 1148.403 | 17.22    | 1148.403 | 17.2165 |
| 17.43    | 1148.403 | 16.97    | 1148.403 | 17.42614 | 1148.403 | 17.22747 | 1148.403 | 17.22   |
| 17.43762 | 1148.403 | 16.97771 | 1148.403 | 17.43    | 1148.403 | 17.23    | 1148.403 | 17.2265 |
| 17.44    | 1148.403 | 16.98    | 1148.403 | 17.43614 | 1148.403 | 17.23747 | 1148.403 | 17.23   |
| 17.44762 | 1148.403 | 16.98771 | 1148.403 | 17.44    | 1148.403 | 17.24    | 1148.403 | 17.2365 |
| 17.45    | 1148.403 | 16.99    | 1148.403 | 17.44614 | 1148.403 | 17.24747 | 1148.403 | 17.24   |
| 17.45762 | 1148.403 | 16.99771 | 1148.403 | 17.45    | 1148.403 | 17.25    | 1148.403 | 17.2465 |
| 17.46    | 1148.403 | 17       | 1148.403 | 17.45614 | 1148.403 | 17.25747 | 1148.403 | 17.25   |
| 17.46762 | 1148.403 | 17.00771 | 1148.403 | 17.46    | 1148.403 | 17.26    | 1148.403 | 17.2565 |
| 17.47    | 1148.403 | 17.01    | 1148.403 | 17.46614 | 1148.403 | 17.26747 | 1148.403 | 17.26   |
| 17.47762 | 1148.403 | 17.01771 | 1148.403 | 17.47    | 1148.403 | 17.27    | 1148.403 | 17.2665 |
| 17.48    | 1148.403 | 17.02    | 1148.403 | 17.47614 | 1148.403 | 17.27747 | 1148.403 | 17.27   |
| 17.48762 | 1148.403 | 17.02771 | 1148.403 | 17.48    | 1148.403 | 17.28    | 1148.403 | 17.2765 |
| 17.49    | 1148.403 | 17.03    | 1148.403 | 17.48614 | 1148.403 | 17.28747 | 1148.403 | 17.28   |
| 17.49762 | 1148.403 | 17.03771 | 1148.403 | 17.49    | 1148.403 | 17.29    | 1148.403 | 17.2865 |
| 17.5     | 1148.403 | 17.04    | 1148.403 | 17.49614 | 1148.403 | 17.29747 | 1148.403 | 17.29   |
| 17.50762 | 1148.403 | 17.04771 | 1148.403 | 17.5     | 1148.403 | 17.3     | 1148.403 | 17.2965 |
| 17.51    | 1148.403 | 17.05    | 1148.403 | 17.50614 | 1148.403 | 17.30747 | 1148.403 | 17.3    |
| 17.51762 | 1148.403 | 17.05771 | 1148.403 | 17.51    | 1148.403 | 17.31    | 1148.403 | 17.3065 |
| 17.52    | 1148.403 | 17.06    | 1148.403 | 17.51614 | 1148.403 | 17.31747 | 1148.403 | 17.31   |
| 17.52762 | 1148.403 | 17.06771 | 1148.403 | 17.52    | 1148.403 | 17.32    | 1148.403 | 17.3165 |
| 17.53    | 1148.403 | 17.07    | 1148.403 | 17.52614 | 1148.403 | 17.32747 | 1148.403 | 17.32   |
| 17.53762 | 1148.403 | 17.07771 | 1148.403 | 17.53    | 1148.403 | 17.33    | 1148.403 | 17.3265 |
| 17.54    | 1148.403 | 17.08    | 1148.403 | 17.53614 | 1148.403 | 17.33747 | 1148.403 | 17.33   |
| 17.54762 | 1148.403 | 17.08771 | 1148.403 | 17.54    | 1148.403 | 17.34    | 1148.403 | 17.3365 |
| 17.55    | 1148.403 | 17.09    | 1148.403 | 17.54614 | 1148.403 | 17.34747 | 1148.403 | 17.34   |
| 17.55762 | 1148.403 | 17.09771 | 1148.403 | 17.55    | 1148.403 | 17.35    | 1148.403 | 17.3465 |

|          |          |          |          |          |          |          |          |         |
|----------|----------|----------|----------|----------|----------|----------|----------|---------|
| 17.56    | 1148.403 | 17.1     | 1148.403 | 17.55614 | 1148.403 | 17.35747 | 1148.403 | 17.35   |
| 17.56762 | 1148.403 | 17.10771 | 1148.403 | 17.56    | 1148.403 | 17.36    | 1148.403 | 17.3565 |
| 17.57    | 1148.403 | 17.11    | 1148.403 | 17.56614 | 1148.403 | 17.36747 | 1148.403 | 17.36   |
| 17.57762 | 1148.403 | 17.11771 | 1148.403 | 17.57    | 1148.403 | 17.37    | 1148.403 | 17.3665 |
| 17.58    | 1148.403 | 17.12    | 1148.403 | 17.57614 | 1148.403 | 17.37747 | 1148.403 | 17.37   |
| 17.58762 | 1148.403 | 17.12771 | 1148.403 | 17.58    | 1148.403 | 17.38    | 1148.403 | 17.3765 |
| 17.59    | 1148.403 | 17.13    | 1148.403 | 17.58614 | 1148.403 | 17.38747 | 1148.403 | 17.38   |
| 17.59762 | 1148.403 | 17.13771 | 1148.403 | 17.59    | 1148.403 | 17.39    | 1148.403 | 17.3865 |
| 17.6     | 1148.403 | 17.14    | 1148.403 | 17.59614 | 1148.403 | 17.39747 | 1148.403 | 17.39   |
| 17.60762 | 1148.403 | 17.14771 | 1148.403 | 17.6     | 1148.403 | 17.4     | 1148.403 | 17.3965 |
| 17.61    | 1148.403 | 17.15    | 1148.403 | 17.60614 | 1148.403 | 17.40747 | 1148.403 | 17.4    |
| 17.61762 | 1148.403 | 17.15771 | 1148.403 | 17.61    | 1148.403 | 17.41    | 1148.403 | 17.4065 |
| 17.62    | 1148.403 | 17.16    | 1148.403 | 17.61614 | 1148.403 | 17.41747 | 1148.403 | 17.41   |
| 17.62762 | 1148.403 | 17.16771 | 1148.403 | 17.62    | 1148.403 | 17.42    | 1148.403 | 17.4165 |
| 17.63    | 1148.403 | 17.17    | 1148.403 | 17.62614 | 1148.403 | 17.42747 | 1148.403 | 17.42   |
| 17.63762 | 1148.403 | 17.17771 | 1148.403 | 17.63    | 1148.403 | 17.43    | 1148.403 | 17.4265 |
| 17.64    | 1148.403 | 17.18    | 1148.403 | 17.63614 | 1148.403 | 17.43747 | 1148.403 | 17.43   |
| 17.64762 | 1148.403 | 17.18771 | 1148.403 | 17.64    | 1148.403 | 17.44    | 1148.403 | 17.4365 |
| 17.65    | 1148.403 | 17.19    | 1148.403 | 17.64614 | 1148.403 | 17.44747 | 1148.403 | 17.44   |
| 17.65762 | 1148.403 | 17.19771 | 1148.403 | 17.65    | 1148.403 | 17.45    | 1148.403 | 17.4465 |
| 17.66    | 1148.403 | 17.2     | 1148.403 | 17.65614 | 1148.403 | 17.45747 | 1148.403 | 17.45   |
| 17.66762 | 1148.403 | 17.20771 | 1148.403 | 17.66    | 1148.403 | 17.46    | 1148.403 | 17.4565 |
| 17.67    | 1148.403 | 17.21    | 1148.403 | 17.66614 | 1148.403 | 17.46747 | 1148.403 | 17.46   |
| 17.67762 | 1148.403 | 17.21771 | 1148.403 | 17.67    | 1148.403 | 17.47    | 1148.403 | 17.4665 |
| 17.68    | 1148.403 | 17.22    | 1148.403 | 17.67614 | 1148.403 | 17.47747 | 1148.403 | 17.47   |
| 17.68762 | 1148.403 | 17.22771 | 1148.403 | 17.68    | 1148.403 | 17.48    | 1148.403 | 17.4765 |
| 17.69    | 1148.403 | 17.23    | 1148.403 | 17.68614 | 1148.403 | 17.48747 | 1148.403 | 17.48   |
| 17.69762 | 1148.403 | 17.23771 | 1148.403 | 17.69    | 1148.403 | 17.49    | 1148.403 | 17.4865 |
| 17.7     | 1148.403 | 17.24    | 1148.403 | 17.69614 | 1148.403 | 17.49747 | 1148.403 | 17.49   |
| 17.70762 | 1148.403 | 17.24771 | 1148.403 | 17.7     | 1148.403 | 17.5     | 1148.403 | 17.4965 |
| 17.71    | 1148.403 | 17.25    | 1148.403 | 17.70614 | 1148.403 | 17.50747 | 1148.403 | 17.5    |
| 17.71762 | 1148.403 | 17.25771 | 1148.403 | 17.71    | 1148.403 | 17.51    | 1148.403 | 17.5065 |
| 17.72    | 1148.403 | 17.26    | 1148.403 | 17.71614 | 1148.403 | 17.51747 | 1148.403 | 17.51   |
| 17.72762 | 1148.403 | 17.26771 | 1148.403 | 17.72    | 1148.403 | 17.52    | 1148.403 | 17.5165 |
| 17.73    | 1148.403 | 17.27    | 1148.403 | 17.72614 | 1148.403 | 17.52747 | 1148.403 | 17.52   |
| 17.73762 | 1148.403 | 17.27771 | 1148.403 | 17.73    | 1148.403 | 17.53    | 1148.403 | 17.5265 |
| 17.74    | 1148.403 | 17.28    | 1148.403 | 17.73614 | 1148.403 | 17.53747 | 1148.403 | 17.53   |
| 17.74762 | 1148.403 | 17.28771 | 1148.403 | 17.74    | 1148.403 | 17.54    | 1148.403 | 17.5365 |
| 17.75    | 1148.403 | 17.29    | 1148.403 | 17.74614 | 1148.403 | 17.54747 | 1148.403 | 17.54   |
| 17.75762 | 1148.403 | 17.29771 | 1148.403 | 17.75    | 1148.403 | 17.55    | 1148.403 | 17.5465 |
| 17.76    | 1148.403 | 17.3     | 1148.403 | 17.75614 | 1148.403 | 17.55747 | 1148.403 | 17.55   |
| 17.76762 | 1148.403 | 17.30771 | 1148.403 | 17.76    | 1148.403 | 17.56    | 1148.403 | 17.5565 |
| 17.77    | 1148.403 | 17.31    | 1148.403 | 17.76614 | 1148.403 | 17.56747 | 1148.403 | 17.56   |
| 17.77762 | 1148.403 | 17.31771 | 1148.403 | 17.77    | 1148.403 | 17.57    | 1148.403 | 17.5665 |
| 17.78    | 1148.403 | 17.32    | 1148.403 | 17.77614 | 1148.403 | 17.57747 | 1148.403 | 17.57   |
| 17.78762 | 1148.403 | 17.32771 | 1148.403 | 17.78    | 1148.403 | 17.58    | 1148.403 | 17.5765 |
| 17.79    | 1148.403 | 17.33    | 1148.403 | 17.78614 | 1148.403 | 17.58747 | 1148.403 | 17.58   |

|          |          |          |          |          |          |          |          |         |
|----------|----------|----------|----------|----------|----------|----------|----------|---------|
| 17.79762 | 1148.403 | 17.33771 | 1148.403 | 17.79    | 1148.403 | 17.59    | 1148.403 | 17.5865 |
| 17.8     | 1148.403 | 17.34    | 1148.403 | 17.79614 | 1148.403 | 17.59747 | 1148.403 | 17.59   |
| 17.80762 | 1148.403 | 17.34771 | 1148.403 | 17.8     | 1148.403 | 17.6     | 1148.403 | 17.5965 |
| 17.81    | 1148.403 | 17.35    | 1148.403 | 17.80614 | 1148.403 | 17.60747 | 1148.403 | 17.6    |
| 17.81762 | 1148.403 | 17.35771 | 1148.403 | 17.81    | 1148.403 | 17.61    | 1148.403 | 17.6065 |
| 17.82    | 1148.403 | 17.36    | 1148.403 | 17.81614 | 1148.403 | 17.61747 | 1148.403 | 17.61   |
| 17.82762 | 1148.403 | 17.36771 | 1148.403 | 17.82    | 1148.403 | 17.62    | 1148.403 | 17.6165 |
| 17.83    | 1148.403 | 17.37    | 1148.403 | 17.82614 | 1148.403 | 17.62747 | 1148.403 | 17.62   |
| 17.83762 | 1148.403 | 17.37771 | 1148.403 | 17.83    | 1148.403 | 17.63    | 1148.403 | 17.6265 |
| 17.84    | 1148.403 | 17.38    | 1148.403 | 17.83614 | 1148.403 | 17.63747 | 1148.403 | 17.63   |
| 17.84762 | 1148.403 | 17.38771 | 1148.403 | 17.84    | 1148.403 | 17.64    | 1148.403 | 17.6365 |
| 17.85    | 1148.403 | 17.39    | 1148.403 | 17.84614 | 1148.403 | 17.64747 | 1148.403 | 17.64   |
| 17.85762 | 1148.403 | 17.39771 | 1148.403 | 17.85    | 1148.403 | 17.65    | 1148.403 | 17.6465 |
| 17.86    | 1148.403 | 17.4     | 1148.403 | 17.85614 | 1148.403 | 17.65747 | 1148.403 | 17.65   |
| 17.86762 | 1148.403 | 17.40771 | 1148.403 | 17.86    | 1148.403 | 17.66    | 1148.403 | 17.6565 |
| 17.87    | 1148.403 | 17.41    | 1148.403 | 17.86614 | 1148.403 | 17.66747 | 1148.403 | 17.66   |
| 17.87762 | 1148.403 | 17.41771 | 1148.403 | 17.87    | 1148.403 | 17.67    | 1148.403 | 17.6665 |
| 17.88    | 1148.403 | 17.42    | 1148.403 | 17.87614 | 1148.403 | 17.67747 | 1148.403 | 17.67   |
| 17.88762 | 1148.403 | 17.42771 | 1148.403 | 17.88    | 1148.403 | 17.68    | 1148.403 | 17.6765 |
| 17.89    | 1148.403 | 17.43    | 1148.403 | 17.88614 | 1148.403 | 17.68747 | 1148.403 | 17.68   |
| 17.89762 | 1148.403 | 17.43771 | 1148.403 | 17.89    | 1148.403 | 17.69    | 1148.403 | 17.6865 |
| 17.9     | 1148.403 | 17.44    | 1148.403 | 17.89614 | 1148.403 | 17.69747 | 1148.403 | 17.69   |
| 17.90762 | 1148.403 | 17.44771 | 1148.403 | 17.9     | 1148.403 | 17.7     | 1148.403 | 17.6965 |
| 17.91    | 1148.403 | 17.45    | 1148.403 | 17.90614 | 1148.403 | 17.70747 | 1148.403 | 17.7    |
| 17.91762 | 1148.403 | 17.45771 | 1148.403 | 17.91    | 1148.403 | 17.71    | 1148.403 | 17.7065 |
| 17.92    | 1148.403 | 17.46    | 1148.403 | 17.91614 | 1148.403 | 17.71747 | 1148.403 | 17.71   |
| 17.92762 | 1148.403 | 17.46771 | 1148.403 | 17.92    | 1148.403 | 17.72    | 1148.403 | 17.7165 |
| 17.93    | 1148.403 | 17.47    | 1148.403 | 17.92614 | 1148.403 | 17.72747 | 1148.403 | 17.72   |
| 17.93762 | 1148.403 | 17.47771 | 1148.403 | 17.93    | 1148.403 | 17.73    | 1148.403 | 17.7265 |
| 17.94    | 1148.403 | 17.48    | 1148.403 | 17.93614 | 1148.403 | 17.73747 | 1148.403 | 17.73   |
| 17.94762 | 1148.403 | 17.48771 | 1148.403 | 17.94    | 1148.403 | 17.74    | 1148.403 | 17.7365 |
| 17.95    | 1148.403 | 17.49    | 1148.403 | 17.94614 | 1148.403 | 17.74747 | 1148.403 | 17.74   |
| 17.95762 | 1148.403 | 17.49771 | 1148.403 | 17.95    | 1148.403 | 17.75    | 1148.403 | 17.7465 |
| 17.96    | 1148.403 | 17.5     | 1148.403 | 17.95614 | 1148.403 | 17.75747 | 1148.403 | 17.75   |
| 17.96762 | 1148.403 | 17.50771 | 1148.403 | 17.96    | 1148.403 | 17.76    | 1148.403 | 17.7565 |
| 17.97    | 1148.403 | 17.51    | 1148.403 | 17.96614 | 1148.403 | 17.76747 | 1148.403 | 17.76   |
| 17.97762 | 1148.403 | 17.51771 | 1148.403 | 17.97    | 1148.403 | 17.77    | 1148.403 | 17.7665 |
| 17.98    | 1148.403 | 17.52    | 1148.403 | 17.97614 | 1148.403 | 17.77747 | 1148.403 | 17.77   |
| 17.98762 | 1148.403 | 17.52771 | 1148.403 | 17.98    | 1148.403 | 17.78    | 1148.403 | 17.7765 |
| 17.99    | 1148.403 | 17.53    | 1148.403 | 17.98614 | 1148.403 | 17.78747 | 1148.403 | 17.78   |
| 17.99762 | 1148.403 | 17.53771 | 1148.403 | 17.99    | 1148.403 | 17.79    | 1148.403 | 17.7865 |
| 18       | 1148.403 | 17.54    | 1148.403 | 17.99614 | 1148.403 | 17.79747 | 1148.403 | 17.79   |
| 18.00762 | 1148.403 | 17.54771 | 1148.403 | 18       | 1148.403 | 17.8     | 1148.403 | 17.7965 |
| 18.01    | 1148.403 | 17.55    | 1148.403 | 18.00614 | 1148.403 | 17.80747 | 1148.403 | 17.8    |
| 18.01762 | 1148.403 | 17.55771 | 1148.403 | 18.01    | 1148.403 | 17.81    | 1148.403 | 17.8065 |
| 18.02    | 1148.403 | 17.56    | 1148.403 | 18.01614 | 1148.403 | 17.81747 | 1148.403 | 17.81   |
| 18.02762 | 1148.403 | 17.56771 | 1148.403 | 18.02    | 1148.403 | 17.82    | 1148.403 | 17.8165 |

|          |          |          |          |          |          |          |          |         |
|----------|----------|----------|----------|----------|----------|----------|----------|---------|
| 18.03    | 1148.403 | 17.57    | 1148.403 | 18.02614 | 1148.403 | 17.82747 | 1148.403 | 17.82   |
| 18.03762 | 1148.403 | 17.57771 | 1148.403 | 18.03    | 1148.403 | 17.83    | 1148.403 | 17.8265 |
| 18.04    | 1148.403 | 17.58    | 1148.403 | 18.03614 | 1148.403 | 17.83747 | 1148.403 | 17.83   |
| 18.04762 | 1148.403 | 17.58771 | 1148.403 | 18.04    | 1148.403 | 17.84    | 1148.403 | 17.8365 |
| 18.05    | 1148.403 | 17.59    | 1148.403 | 18.04614 | 1148.403 | 17.84747 | 1148.403 | 17.84   |
| 18.05762 | 1148.403 | 17.59771 | 1148.403 | 18.05    | 1148.403 | 17.85    | 1148.403 | 17.8465 |
| 18.06    | 1148.403 | 17.6     | 1148.403 | 18.05614 | 1148.403 | 17.85747 | 1148.403 | 17.85   |
| 18.06762 | 1148.403 | 17.60771 | 1148.403 | 18.06    | 1148.403 | 17.86    | 1148.403 | 17.8565 |
| 18.07    | 1148.403 | 17.61    | 1148.403 | 18.06614 | 1148.403 | 17.86747 | 1148.403 | 17.86   |
| 18.07762 | 1148.403 | 17.61771 | 1148.403 | 18.07    | 1148.403 | 17.87    | 1148.403 | 17.8665 |
| 18.08    | 1148.403 | 17.62    | 1148.403 | 18.07614 | 1148.403 | 17.87747 | 1148.403 | 17.87   |
| 18.08762 | 1148.403 | 17.62771 | 1148.403 | 18.08    | 1148.403 | 17.88    | 1148.403 | 17.8765 |
| 18.09    | 1148.403 | 17.63    | 1148.403 | 18.08614 | 1148.403 | 17.88747 | 1148.403 | 17.88   |
| 18.09762 | 1148.403 | 17.63771 | 1148.403 | 18.09    | 1148.403 | 17.89    | 1148.403 | 17.8865 |
| 18.1     | 1148.403 | 17.64    | 1148.403 | 18.09614 | 1148.403 | 17.89747 | 1148.403 | 17.89   |
| 18.10762 | 1148.403 | 17.64771 | 1148.403 | 18.1     | 1148.403 | 17.9     | 1148.403 | 17.8965 |
| 18.11    | 1148.403 | 17.65    | 1148.403 | 18.10614 | 1148.403 | 17.90747 | 1148.403 | 17.9    |
| 18.11762 | 1148.403 | 17.65771 | 1148.403 | 18.11    | 1148.403 | 17.91    | 1148.403 | 17.9065 |
| 18.12    | 1148.403 | 17.66    | 1148.403 | 18.11614 | 1148.403 | 17.91747 | 1148.403 | 17.91   |
| 18.12762 | 1148.403 | 17.66771 | 1148.403 | 18.12    | 1148.403 | 17.92    | 1148.403 | 17.9165 |
| 18.13    | 1148.403 | 17.67    | 1148.403 | 18.12614 | 1148.403 | 17.92747 | 1148.403 | 17.92   |
| 18.13762 | 1148.403 | 17.67771 | 1148.403 | 18.13    | 1148.403 | 17.93    | 1148.403 | 17.9265 |
| 18.14    | 1148.403 | 17.68    | 1148.403 | 18.13614 | 1148.403 | 17.93747 | 1148.403 | 17.93   |
| 18.14762 | 1148.403 | 17.68771 | 1148.403 | 18.14    | 1148.403 | 17.94    | 1148.403 | 17.9365 |
| 18.15    | 1148.403 | 17.69    | 1148.403 | 18.14614 | 1148.403 | 17.94747 | 1148.403 | 17.94   |
| 18.15762 | 1148.403 | 17.69771 | 1148.403 | 18.15    | 1148.403 | 17.95    | 1148.403 | 17.9465 |
| 18.16    | 1148.403 | 17.7     | 1148.403 | 18.15614 | 1148.403 | 17.95747 | 1148.403 | 17.95   |
| 18.16762 | 1148.403 | 17.70771 | 1148.403 | 18.16    | 1148.403 | 17.96    | 1148.403 | 17.9565 |
| 18.17    | 1148.403 | 17.71    | 1148.403 | 18.16614 | 1148.403 | 17.96747 | 1148.403 | 17.96   |
| 18.17762 | 1148.403 | 17.71771 | 1148.403 | 18.17    | 1148.403 | 17.97    | 1148.403 | 17.9665 |
| 18.18    | 1148.403 | 17.72    | 1148.403 | 18.17614 | 1148.403 | 17.97747 | 1148.403 | 17.97   |
| 18.18762 | 1148.403 | 17.72771 | 1148.403 | 18.18    | 1148.403 | 17.98    | 1148.403 | 17.9765 |
| 18.19    | 1148.403 | 17.73    | 1148.403 | 18.18614 | 1148.403 | 17.98747 | 1148.403 | 17.98   |
| 18.19762 | 1148.403 | 17.73771 | 1148.403 | 18.19    | 1148.403 | 17.99    | 1148.403 | 17.9865 |
| 18.2     | 1148.403 | 17.74    | 1148.403 | 18.19614 | 1148.403 | 17.99747 | 1148.403 | 17.99   |
| 18.20762 | 1148.403 | 17.74771 | 1148.403 | 18.2     | 1148.403 | 18       | 1148.403 | 17.9965 |
| 18.21    | 1148.403 | 17.75    | 1148.403 | 18.20614 | 1148.403 | 18.00747 | 1148.403 | 18      |
| 18.21762 | 1148.403 | 17.75771 | 1148.403 | 18.21    | 1148.403 | 18.01    | 1148.403 | 18.0065 |
| 18.22    | 1148.403 | 17.76    | 1148.403 | 18.21614 | 1148.403 | 18.01747 | 1148.403 | 18.01   |
| 18.22762 | 1148.403 | 17.76771 | 1148.403 | 18.22    | 1148.403 | 18.02    | 1148.403 | 18.0165 |
| 18.23    | 1148.403 | 17.77    | 1148.403 | 18.22614 | 1148.403 | 18.02747 | 1148.403 | 18.02   |
| 18.23762 | 1148.403 | 17.77771 | 1148.403 | 18.23    | 1148.403 | 18.03    | 1148.403 | 18.0265 |
| 18.24    | 1148.403 | 17.78    | 1148.403 | 18.23614 | 1148.403 | 18.03747 | 1148.403 | 18.03   |
| 18.24762 | 1148.403 | 17.78771 | 1148.403 | 18.24    | 1148.403 | 18.04    | 1148.403 | 18.0365 |
| 18.25    | 1148.403 | 17.79    | 1148.403 | 18.24614 | 1148.403 | 18.04747 | 1148.403 | 18.04   |
| 18.25762 | 1148.403 | 17.79771 | 1148.403 | 18.25    | 1148.403 | 18.05    | 1148.403 | 18.0465 |
| 18.26    | 1148.403 | 17.8     | 1148.403 | 18.25614 | 1148.403 | 18.05747 | 1148.403 | 18.05   |

|          |          |          |          |          |          |          |          |         |
|----------|----------|----------|----------|----------|----------|----------|----------|---------|
| 18.26762 | 1148.403 | 17.80771 | 1148.403 | 18.26    | 1148.403 | 18.06    | 1148.403 | 18.0565 |
| 18.27    | 1148.403 | 17.81    | 1148.403 | 18.26614 | 1148.403 | 18.06747 | 1148.403 | 18.06   |
| 18.27762 | 1148.403 | 17.81771 | 1148.403 | 18.27    | 1148.403 | 18.07    | 1148.403 | 18.0665 |
| 18.28    | 1148.403 | 17.82    | 1148.403 | 18.27614 | 1148.403 | 18.07747 | 1148.403 | 18.07   |
| 18.28762 | 1148.403 | 17.82771 | 1148.403 | 18.28    | 1148.403 | 18.08    | 1148.403 | 18.0765 |
| 18.29    | 1148.403 | 17.83    | 1148.403 | 18.28614 | 1148.403 | 18.08747 | 1148.403 | 18.08   |
| 18.29762 | 1148.403 | 17.83771 | 1148.403 | 18.29    | 1148.403 | 18.09    | 1148.403 | 18.0865 |
| 18.3     | 1148.403 | 17.84    | 1148.403 | 18.29614 | 1148.403 | 18.09747 | 1148.403 | 18.09   |
| 18.30762 | 1148.403 | 17.84771 | 1148.403 | 18.3     | 1148.403 | 18.1     | 1148.403 | 18.0965 |
| 18.31    | 1148.403 | 17.85    | 1148.403 | 18.30614 | 1148.403 | 18.10747 | 1148.403 | 18.1    |
| 18.31762 | 1148.403 | 17.85771 | 1148.403 | 18.31    | 1148.403 | 18.11    | 1148.403 | 18.1065 |
| 18.32    | 1148.403 | 17.86    | 1148.403 | 18.31614 | 1148.403 | 18.11747 | 1148.403 | 18.11   |
| 18.32762 | 1148.403 | 17.86771 | 1148.403 | 18.32    | 1148.403 | 18.12    | 1148.403 | 18.1165 |
| 18.33    | 1148.403 | 17.87    | 1148.403 | 18.32614 | 1148.403 | 18.12747 | 1148.403 | 18.12   |
| 18.33762 | 1148.403 | 17.87771 | 1148.403 | 18.33    | 1148.403 | 18.13    | 1148.403 | 18.1265 |
| 18.34    | 1148.403 | 17.88    | 1148.403 | 18.33614 | 1148.403 | 18.13747 | 1148.403 | 18.13   |
| 18.34762 | 1148.403 | 17.88771 | 1148.403 | 18.34    | 1148.403 | 18.14    | 1148.403 | 18.1365 |
| 18.35    | 1148.403 | 17.89    | 1148.403 | 18.34614 | 1148.403 | 18.14747 | 1148.403 | 18.14   |
| 18.35762 | 1148.403 | 17.89771 | 1148.403 | 18.35    | 1148.403 | 18.15    | 1148.403 | 18.1465 |
| 18.36    | 1148.403 | 17.9     | 1148.403 | 18.35614 | 1148.403 | 18.15747 | 1148.403 | 18.15   |
| 18.36762 | 1148.403 | 17.90771 | 1148.403 | 18.36    | 1148.403 | 18.16    | 1148.403 | 18.1565 |
| 18.37    | 1148.403 | 17.91    | 1148.403 | 18.36614 | 1148.403 | 18.16747 | 1148.403 | 18.16   |
| 18.37762 | 1148.403 | 17.91771 | 1148.403 | 18.37    | 1148.403 | 18.17    | 1148.403 | 18.1665 |
| 18.38    | 1148.403 | 17.92    | 1148.403 | 18.37614 | 1148.403 | 18.17747 | 1148.403 | 18.17   |
| 18.38762 | 1148.403 | 17.92771 | 1148.403 | 18.38    | 1148.403 | 18.18    | 1148.403 | 18.1765 |
| 18.39    | 1148.403 | 17.93    | 1148.403 | 18.38614 | 1148.403 | 18.18747 | 1148.403 | 18.18   |
| 18.39762 | 1148.403 | 17.93771 | 1148.403 | 18.39    | 1148.403 | 18.19    | 1148.403 | 18.1865 |
| 18.4     | 1148.403 | 17.94    | 1148.403 | 18.39614 | 1148.403 | 18.19747 | 1148.403 | 18.19   |
| 18.40762 | 1148.403 | 17.94771 | 1148.403 | 18.4     | 1148.403 | 18.2     | 1148.403 | 18.1965 |
| 18.41    | 1148.403 | 17.95    | 1148.403 | 18.40614 | 1148.403 | 18.20747 | 1148.403 | 18.2    |
| 18.41762 | 1148.403 | 17.95771 | 1148.403 | 18.41    | 1148.403 | 18.21    | 1148.403 | 18.2065 |
| 18.42    | 1148.403 | 17.96    | 1148.403 | 18.41614 | 1148.403 | 18.21747 | 1148.403 | 18.21   |
| 18.42762 | 1148.403 | 17.96771 | 1148.403 | 18.42    | 1148.403 | 18.22    | 1148.403 | 18.2165 |
| 18.43    | 1148.403 | 17.97    | 1148.403 | 18.42614 | 1148.403 | 18.22747 | 1148.403 | 18.22   |
| 18.43762 | 1148.403 | 17.97771 | 1148.403 | 18.43    | 1148.403 | 18.23    | 1148.403 | 18.2265 |
| 18.44    | 1148.403 | 17.98    | 1148.403 | 18.43614 | 1148.403 | 18.23747 | 1148.403 | 18.23   |
| 18.44762 | 1148.403 | 17.98771 | 1148.403 | 18.44    | 1148.403 | 18.24    | 1148.403 | 18.2365 |
| 18.45    | 1148.403 | 17.99    | 1148.403 | 18.44614 | 1148.403 | 18.24747 | 1148.403 | 18.24   |
| 18.45762 | 1148.403 | 17.99771 | 1148.403 | 18.45    | 1148.403 | 18.25    | 1148.403 | 18.2465 |
| 18.46    | 1148.403 | 18       | 1148.403 | 18.45614 | 1148.403 | 18.25747 | 1148.403 | 18.25   |
| 18.46762 | 1148.403 | 18.00771 | 1148.403 | 18.46    | 1148.403 | 18.26    | 1148.403 | 18.2565 |
| 18.47    | 1148.403 | 18.01    | 1148.403 | 18.46614 | 1148.403 | 18.26747 | 1148.403 | 18.26   |
| 18.47762 | 1148.403 | 18.01771 | 1148.403 | 18.47    | 1148.403 | 18.27    | 1148.403 | 18.2665 |
| 18.48    | 1148.403 | 18.02    | 1148.403 | 18.47614 | 1148.403 | 18.27747 | 1148.403 | 18.27   |
| 18.48762 | 1148.403 | 18.02771 | 1148.403 | 18.48    | 1148.403 | 18.28    | 1148.403 | 18.2765 |
| 18.49    | 1148.403 | 18.03    | 1148.403 | 18.48614 | 1148.403 | 18.28747 | 1148.403 | 18.28   |
| 18.49762 | 1148.403 | 18.03771 | 1148.403 | 18.49    | 1148.403 | 18.29    | 1148.403 | 18.2865 |

|          |          |          |          |          |          |          |          |         |
|----------|----------|----------|----------|----------|----------|----------|----------|---------|
| 18.5     | 1148.403 | 18.04    | 1148.403 | 18.49614 | 1148.403 | 18.29747 | 1148.403 | 18.29   |
| 18.50762 | 1148.403 | 18.04771 | 1148.403 | 18.5     | 1148.403 | 18.3     | 1148.403 | 18.2965 |
| 18.51    | 1148.403 | 18.05    | 1148.403 | 18.50614 | 1148.403 | 18.30747 | 1148.403 | 18.3    |
| 18.51762 | 1148.403 | 18.05771 | 1148.403 | 18.51    | 1148.403 | 18.31    | 1148.403 | 18.3065 |
| 18.52    | 1148.403 | 18.06    | 1148.403 | 18.51614 | 1148.403 | 18.31747 | 1148.403 | 18.31   |
| 18.52762 | 1148.403 | 18.06771 | 1148.403 | 18.52    | 1148.403 | 18.32    | 1148.403 | 18.3165 |
| 18.53    | 1148.403 | 18.07    | 1148.403 | 18.52614 | 1148.403 | 18.32747 | 1148.403 | 18.32   |
| 18.53762 | 1148.403 | 18.07771 | 1148.403 | 18.53    | 1148.403 | 18.33    | 1148.403 | 18.3265 |
| 18.54    | 1148.403 | 18.08    | 1148.403 | 18.53614 | 1148.403 | 18.33747 | 1148.403 | 18.33   |
| 18.54762 | 1148.403 | 18.08771 | 1148.403 | 18.54    | 1148.403 | 18.34    | 1148.403 | 18.3365 |
| 18.55    | 1148.403 | 18.09    | 1148.403 | 18.54614 | 1148.403 | 18.34747 | 1148.403 | 18.34   |
| 18.55762 | 1148.403 | 18.09771 | 1148.403 | 18.55    | 1148.403 | 18.35    | 1148.403 | 18.3465 |
| 18.56    | 1148.403 | 18.1     | 1148.403 | 18.55614 | 1148.403 | 18.35747 | 1148.403 | 18.35   |
| 18.56762 | 1148.403 | 18.10771 | 1148.403 | 18.56    | 1148.403 | 18.36    | 1148.403 | 18.3565 |
| 18.57    | 1148.403 | 18.11    | 1148.403 | 18.56614 | 1148.403 | 18.36747 | 1148.403 | 18.36   |
| 18.57762 | 1148.403 | 18.11771 | 1148.403 | 18.57    | 1148.403 | 18.37    | 1148.403 | 18.3665 |
| 18.58    | 1148.403 | 18.12    | 1148.403 | 18.57614 | 1148.403 | 18.37747 | 1148.403 | 18.37   |
| 18.58762 | 1148.403 | 18.12771 | 1148.403 | 18.58    | 1148.403 | 18.38    | 1148.403 | 18.3765 |
| 18.59    | 1148.403 | 18.13    | 1148.403 | 18.58614 | 1148.403 | 18.38747 | 1148.403 | 18.38   |
| 18.59762 | 1148.403 | 18.13771 | 1148.403 | 18.59    | 1148.403 | 18.39    | 1148.403 | 18.3865 |
| 18.6     | 1148.403 | 18.14    | 1148.403 | 18.59614 | 1148.403 | 18.39747 | 1148.403 | 18.39   |
| 18.60762 | 1148.403 | 18.14771 | 1148.403 | 18.6     | 1148.403 | 18.4     | 1148.403 | 18.3965 |
| 18.61    | 1148.403 | 18.15    | 1148.403 | 18.60614 | 1148.403 | 18.40747 | 1148.403 | 18.4    |
| 18.61762 | 1148.403 | 18.15771 | 1148.403 | 18.61    | 1148.403 | 18.41    | 1148.403 | 18.4065 |
| 18.62    | 1148.403 | 18.16    | 1148.403 | 18.61614 | 1148.403 | 18.41747 | 1148.403 | 18.41   |
| 18.62762 | 1148.403 | 18.16771 | 1148.403 | 18.62    | 1148.403 | 18.42    | 1148.403 | 18.4165 |
| 18.63    | 1148.403 | 18.17    | 1148.403 | 18.62614 | 1148.403 | 18.42747 | 1148.403 | 18.42   |
| 18.63762 | 1148.403 | 18.17771 | 1148.403 | 18.63    | 1148.403 | 18.43    | 1148.403 | 18.4265 |
| 18.64    | 1148.403 | 18.18    | 1148.403 | 18.63614 | 1148.403 | 18.43747 | 1148.403 | 18.43   |
| 18.64762 | 1148.403 | 18.18771 | 1148.403 | 18.64    | 1148.403 | 18.44    | 1148.403 | 18.4365 |
| 18.65    | 1148.403 | 18.19    | 1148.403 | 18.64614 | 1148.403 | 18.44747 | 1148.403 | 18.44   |
| 18.65762 | 1148.403 | 18.19771 | 1148.403 | 18.65    | 1148.403 | 18.45    | 1148.403 | 18.4465 |
| 18.66    | 1148.403 | 18.2     | 1148.403 | 18.65614 | 1148.403 | 18.45747 | 1148.403 | 18.45   |
| 18.66762 | 1148.403 | 18.20771 | 1148.403 | 18.66    | 1148.403 | 18.46    | 1148.403 | 18.4565 |
| 18.67    | 1148.403 | 18.21    | 1148.403 | 18.66614 | 1148.403 | 18.46747 | 1148.403 | 18.46   |
| 18.67762 | 1148.403 | 18.21771 | 1148.403 | 18.67    | 1148.403 | 18.47    | 1148.403 | 18.4665 |
| 18.68    | 1148.403 | 18.22    | 1148.403 | 18.67614 | 1148.403 | 18.47747 | 1148.403 | 18.47   |
| 18.68762 | 1148.403 | 18.22771 | 1148.403 | 18.68    | 1148.403 | 18.48    | 1148.403 | 18.4765 |
| 18.69    | 1148.403 | 18.23    | 1148.403 | 18.68614 | 1148.403 | 18.48747 | 1148.403 | 18.48   |
| 18.69762 | 1148.403 | 18.23771 | 1148.403 | 18.69    | 1148.403 | 18.49    | 1148.403 | 18.4865 |
| 18.7     | 1148.403 | 18.24    | 1148.403 | 18.69614 | 1148.403 | 18.49747 | 1148.403 | 18.49   |
| 18.70762 | 1148.403 | 18.24771 | 1148.403 | 18.7     | 1148.403 | 18.5     | 1148.403 | 18.4965 |
| 18.71    | 1148.403 | 18.25    | 1148.403 | 18.70614 | 1148.403 | 18.50747 | 1148.403 | 18.5    |
| 18.71762 | 1148.403 | 18.25771 | 1148.403 | 18.71    | 1148.403 | 18.51    | 1148.403 | 18.5065 |
| 18.72    | 1148.403 | 18.26    | 1148.403 | 18.71614 | 1148.403 | 18.51747 | 1148.403 | 18.51   |
| 18.72762 | 1148.403 | 18.26771 | 1148.403 | 18.72    | 1148.403 | 18.52    | 1148.403 | 18.5165 |
| 18.73    | 1148.403 | 18.27    | 1148.403 | 18.72614 | 1148.403 | 18.52747 | 1148.403 | 18.52   |

|          |          |          |          |          |          |          |          |         |
|----------|----------|----------|----------|----------|----------|----------|----------|---------|
| 18.73762 | 1148.403 | 18.27771 | 1148.403 | 18.73    | 1148.403 | 18.53    | 1148.403 | 18.5265 |
| 18.74    | 1148.403 | 18.28    | 1148.403 | 18.73614 | 1148.403 | 18.53747 | 1148.403 | 18.53   |
| 18.74762 | 1148.403 | 18.28771 | 1148.403 | 18.74    | 1148.403 | 18.54    | 1148.403 | 18.5365 |
| 18.75    | 1148.403 | 18.29    | 1148.403 | 18.74614 | 1148.403 | 18.54747 | 1148.403 | 18.54   |
| 18.75762 | 1148.403 | 18.29771 | 1148.403 | 18.75    | 1148.403 | 18.55    | 1148.403 | 18.5465 |
| 18.76    | 1148.403 | 18.3     | 1148.403 | 18.75614 | 1148.403 | 18.55747 | 1148.403 | 18.55   |
| 18.76762 | 1148.403 | 18.30771 | 1148.403 | 18.76    | 1148.403 | 18.56    | 1148.403 | 18.5565 |
| 18.77    | 1148.403 | 18.31    | 1148.403 | 18.76614 | 1148.403 | 18.56747 | 1148.403 | 18.56   |
| 18.77762 | 1148.403 | 18.31771 | 1148.403 | 18.77    | 1148.403 | 18.57    | 1148.403 | 18.5665 |
| 18.78    | 1148.403 | 18.32    | 1148.403 | 18.77614 | 1148.403 | 18.57747 | 1148.403 | 18.57   |
| 18.78762 | 1148.403 | 18.32771 | 1148.403 | 18.78    | 1148.403 | 18.58    | 1148.403 | 18.5765 |
| 18.79    | 1148.403 | 18.33    | 1148.403 | 18.78614 | 1148.403 | 18.58747 | 1148.403 | 18.58   |
| 18.79762 | 1148.403 | 18.33771 | 1148.403 | 18.79    | 1148.403 | 18.59    | 1148.403 | 18.5865 |
| 18.8     | 1148.403 | 18.34    | 1148.403 | 18.79614 | 1148.403 | 18.59747 | 1148.403 | 18.59   |
| 18.80762 | 1148.403 | 18.34771 | 1148.403 | 18.8     | 1148.403 | 18.6     | 1148.403 | 18.5965 |
| 18.81    | 1148.403 | 18.35    | 1148.403 | 18.80614 | 1148.403 | 18.60747 | 1148.403 | 18.6    |
| 18.81762 | 1148.403 | 18.35771 | 1148.403 | 18.81    | 1148.403 | 18.61    | 1148.403 | 18.6065 |
| 18.82    | 1148.403 | 18.36    | 1148.403 | 18.81614 | 1148.403 | 18.61747 | 1148.403 | 18.61   |
| 18.82762 | 1148.403 | 18.36771 | 1148.403 | 18.82    | 1148.403 | 18.62    | 1148.403 | 18.6165 |
| 18.83    | 1148.403 | 18.37    | 1148.403 | 18.82614 | 1148.403 | 18.62747 | 1148.403 | 18.62   |
| 18.83762 | 1148.403 | 18.37771 | 1148.403 | 18.83    | 1148.403 | 18.63    | 1148.403 | 18.6265 |
| 18.84    | 1148.403 | 18.38    | 1148.403 | 18.83614 | 1148.403 | 18.63747 | 1148.403 | 18.63   |
| 18.84762 | 1148.403 | 18.38771 | 1148.403 | 18.84    | 1148.403 | 18.64    | 1148.403 | 18.6365 |
| 18.85    | 1148.403 | 18.39    | 1148.403 | 18.84614 | 1148.403 | 18.64747 | 1148.403 | 18.64   |
| 18.85762 | 1148.403 | 18.39771 | 1148.403 | 18.85    | 1148.403 | 18.65    | 1148.403 | 18.6465 |
| 18.86    | 1148.403 | 18.4     | 1148.403 | 18.85614 | 1148.403 | 18.65747 | 1148.403 | 18.65   |
| 18.86762 | 1148.403 | 18.40771 | 1148.403 | 18.86    | 1148.403 | 18.66    | 1148.403 | 18.6565 |
| 18.87    | 1148.403 | 18.41    | 1148.403 | 18.86614 | 1148.403 | 18.66747 | 1148.403 | 18.66   |
| 18.87762 | 1148.403 | 18.41771 | 1148.403 | 18.87    | 1148.403 | 18.67    | 1148.403 | 18.6665 |
| 18.88    | 1148.403 | 18.42    | 1148.403 | 18.87614 | 1148.403 | 18.67747 | 1148.403 | 18.67   |
| 18.88762 | 1148.403 | 18.42771 | 1148.403 | 18.88    | 1148.403 | 18.68    | 1148.403 | 18.6765 |
| 18.89    | 1148.403 | 18.43    | 1148.403 | 18.88614 | 1148.403 | 18.68747 | 1148.403 | 18.68   |
| 18.89762 | 1148.403 | 18.43771 | 1148.403 | 18.89    | 1148.403 | 18.69    | 1148.403 | 18.6865 |
| 18.9     | 1148.403 | 18.44    | 1148.403 | 18.89614 | 1148.403 | 18.69747 | 1148.403 | 18.69   |
| 18.90762 | 1148.403 | 18.44771 | 1148.403 | 18.9     | 1148.403 | 18.7     | 1148.403 | 18.6965 |
| 18.91    | 1148.403 | 18.45    | 1148.403 | 18.90614 | 1148.403 | 18.70747 | 1148.403 | 18.7    |
| 18.91762 | 1148.403 | 18.45771 | 1148.403 | 18.91    | 1148.403 | 18.71    | 1148.403 | 18.7065 |
| 18.92    | 1148.403 | 18.46    | 1148.403 | 18.91614 | 1148.403 | 18.71747 | 1148.403 | 18.71   |
| 18.92762 | 1148.403 | 18.46771 | 1148.403 | 18.92    | 1148.403 | 18.72    | 1148.403 | 18.7165 |
| 18.93    | 1148.403 | 18.47    | 1148.403 | 18.92614 | 1148.403 | 18.72747 | 1148.403 | 18.72   |
| 18.93762 | 1148.403 | 18.47771 | 1148.403 | 18.93    | 1148.403 | 18.73    | 1148.403 | 18.7265 |
| 18.94    | 1148.403 | 18.48    | 1148.403 | 18.93614 | 1148.403 | 18.73747 | 1148.403 | 18.73   |
| 18.94762 | 1148.403 | 18.48771 | 1148.403 | 18.94    | 1148.403 | 18.74    | 1148.403 | 18.7365 |
| 18.95    | 1148.403 | 18.49    | 1148.403 | 18.94614 | 1148.403 | 18.74747 | 1148.403 | 18.74   |
| 18.95762 | 1148.403 | 18.49771 | 1148.403 | 18.95    | 1148.403 | 18.75    | 1148.403 | 18.7465 |
| 18.96    | 1148.403 | 18.5     | 1148.403 | 18.95614 | 1148.403 | 18.75747 | 1148.403 | 18.75   |
| 18.96762 | 1148.403 | 18.50771 | 1148.403 | 18.96    | 1148.403 | 18.76    | 1148.403 | 18.7565 |



|          |          |          |          |          |          |          |          |          |
|----------|----------|----------|----------|----------|----------|----------|----------|----------|
| 18.97    | 1148.403 | 18.51    | 1148.403 | 18.96614 | 1148.403 | 18.76747 | 1148.403 | 18.75867 |
| 18.97762 | 1148.403 | 18.51771 | 1148.403 | 18.97    | 1148.403 | 18.77    | 1148.403 | 18.76    |
| 18.98    | 1148.403 | 18.52    | 1148.403 | 18.97614 | 1148.403 | 18.77747 | 1148.403 | 18.76217 |
| 18.98762 | 1148.403 | 18.52771 | 1148.403 | 18.98    | 1148.403 | 18.78    | 1148.403 | 18.76404 |
| 18.99    | 1148.403 | 18.53    | 1148.403 | 18.98614 | 1148.403 | 18.78747 | 1148.403 | 18.77    |
| 18.99762 | 1148.403 | 18.53771 | 1148.403 | 18.99    | 1148.403 | 18.79    | 1148.403 | 18.77213 |
| 19       | 1148.403 | 18.54    | 1148.403 | 18.99614 | 1148.403 | 18.79747 | 1148.403 | 18.78    |
| 19.00762 | 1148.403 | 18.54771 | 1148.403 | 19       | 1148.403 | 18.8     | 1148.403 | 18.78213 |
| 19.01    | 1148.403 | 18.55    | 1148.403 | 19.00614 | 1148.403 | 18.80747 | 1148.403 | 18.79    |
| 19.01762 | 1148.403 | 18.55771 | 1148.403 | 19.01    | 1148.403 | 18.81    | 1148.403 | 18.79213 |
| 19.02    | 1148.403 | 18.56    | 1148.403 | 19.01614 | 1148.403 | 18.81747 | 1148.403 | 18.8     |
| 19.02762 | 1148.403 | 18.56771 | 1148.403 | 19.02    | 1148.403 | 18.82    | 1148.403 | 18.80213 |
| 19.03    | 1148.403 | 18.57    | 1148.403 | 19.02614 | 1148.403 | 18.82747 | 1148.403 | 18.81    |
| 19.03762 | 1148.403 | 18.57771 | 1148.403 | 19.03    | 1148.403 | 18.83    | 1148.403 | 18.81213 |
| 19.04    | 1148.403 | 18.58    | 1148.403 | 19.03614 | 1148.403 | 18.83747 | 1148.403 | 18.82    |
| 19.04762 | 1148.403 | 18.58771 | 1148.403 | 19.04    | 1148.403 | 18.84    | 1148.403 | 18.82213 |
| 19.05    | 1148.403 | 18.59    | 1148.403 | 19.04614 | 1148.403 | 18.84747 | 1148.403 | 18.83    |
| 19.05762 | 1148.403 | 18.59771 | 1148.403 | 19.05    | 1148.403 | 18.85    | 1148.403 | 18.83213 |
| 19.06    | 1148.403 | 18.6     | 1148.403 | 19.05614 | 1148.403 | 18.85747 | 1148.403 | 18.84    |
| 19.06717 | 1148.403 | 18.60771 | 1148.403 | 19.06    | 1148.403 | 18.86    | 1148.403 | 18.84213 |
| 19.07    | 1148.403 | 18.61    | 1148.403 | 19.06614 | 1148.403 | 18.86747 | 1148.403 | 18.85    |
| 19.07102 | 1148.403 | 18.61771 | 1148.403 | 19.07    | 1148.403 | 18.87    | 1148.403 | 18.85213 |
| 19.07724 | 1148.403 | 18.62    | 1148.403 | 19.07614 | 1148.403 | 18.87747 | 1148.403 | 18.86    |
| 19.08    | 1148.403 | 18.62771 | 1148.403 | 19.08    | 1148.403 | 18.88    | 1148.403 | 18.86213 |
| 19.08711 | 1148.403 | 18.63    | 1148.403 | 19.08614 | 1148.403 | 18.88747 | 1148.403 | 18.87    |
| 19.09    | 1148.403 | 18.63771 | 1148.403 | 19.09    | 1148.403 | 18.89    | 1148.403 | 18.87213 |
| 19.09711 | 1148.403 | 18.64    | 1148.403 | 19.09614 | 1148.403 | 18.89747 | 1148.403 | 18.88    |
| 19.1     | 1148.403 | 18.64771 | 1148.403 | 19.1     | 1148.403 | 18.9     | 1148.403 | 18.88213 |
| 19.10711 | 1148.403 | 18.65    | 1148.403 | 19.10614 | 1148.403 | 18.90747 | 1148.403 | 18.89    |
| 19.11    | 1148.403 | 18.65771 | 1148.403 | 19.11    | 1148.403 | 18.91    | 1148.403 | 18.89213 |
| 19.11672 | 1148.403 | 18.66    | 1148.403 | 19.11614 | 1148.403 | 18.91747 | 1148.403 | 18.9     |
| 19.12    | 1148.403 | 18.66771 | 1148.403 | 19.12    | 1148.403 | 18.92    | 1148.403 | 18.90213 |
| 19.12678 | 1148.403 | 18.67    | 1148.403 | 19.12614 | 1148.403 | 18.92747 | 1148.403 | 18.91    |
| 19.13    | 1148.403 | 18.67771 | 1148.403 | 19.13    | 1148.403 | 18.93    | 1148.403 | 18.91213 |
| 19.13666 | 1148.403 | 18.68    | 1148.403 | 19.13614 | 1148.403 | 18.93747 | 1148.403 | 18.92    |
| 19.14    | 1148.403 | 18.68771 | 1148.403 | 19.13878 | 1148.403 | 18.94    | 1148.403 | 18.92213 |
| 19.14666 | 1148.403 | 18.69    | 1148.403 | 19.14    | 1148.403 | 18.94747 | 1148.403 | 18.93    |
| 19.15    | 1148.403 | 18.69771 | 1148.403 | 19.1415  | 1148.403 | 18.95    | 1148.403 | 18.93213 |
| 19.15666 | 1148.403 | 18.7     | 1148.403 | 19.14512 | 1148.403 | 18.95747 | 1148.403 | 18.94    |
| 19.16    | 1148.403 | 18.70771 | 1148.403 | 19.15    | 1148.403 | 18.96    | 1148.403 | 18.94213 |
| 19.16666 | 1148.403 | 18.71    | 1148.403 | 19.15413 | 1148.403 | 18.96747 | 1148.403 | 18.95    |
| 19.17    | 1148.403 | 18.71771 | 1148.403 | 19.16    | 1148.403 | 18.97    | 1148.403 | 18.95213 |
| 19.17666 | 1148.403 | 18.72    | 1148.403 | 19.16413 | 1148.403 | 18.97747 | 1148.403 | 18.96    |
| 19.18    | 1148.403 | 18.72771 | 1148.403 | 19.17    | 1148.403 | 18.98    | 1148.403 | 18.96213 |
| 19.18666 | 1148.403 | 18.73    | 1148.403 | 19.17413 | 1148.403 | 18.98747 | 1148.403 | 18.97    |
| 19.19    | 1148.403 | 18.73771 | 1148.403 | 19.18    | 1148.403 | 18.99    | 1148.403 | 18.97213 |
| 19.19666 | 1148.403 | 18.74    | 1148.403 | 19.18413 | 1148.403 | 18.99747 | 1148.403 | 18.98    |

|          |          |          |          |          |          |          |          |          |
|----------|----------|----------|----------|----------|----------|----------|----------|----------|
| 19.2     | 1148.403 | 18.74771 | 1148.403 | 19.19    | 1148.403 | 19       | 1148.403 | 18.98213 |
| 19.20666 | 1148.403 | 18.75    | 1148.403 | 19.19413 | 1148.403 | 19.00747 | 1148.403 | 18.99    |
| 19.21    | 1148.403 | 18.75771 | 1148.403 | 19.2     | 1148.403 | 19.01    | 1148.403 | 18.99213 |
| 19.21666 | 1148.403 | 18.76    | 1148.403 | 19.20413 | 1148.403 | 19.01747 | 1148.403 | 19       |
| 19.22    | 1148.403 | 18.76771 | 1148.403 | 19.21    | 1148.403 | 19.02    | 1148.403 | 19.00213 |
| 19.22666 | 1148.403 | 18.77    | 1148.403 | 19.21413 | 1148.403 | 19.02747 | 1148.403 | 19.01    |
| 19.23    | 1148.403 | 18.77771 | 1148.403 | 19.22    | 1148.403 | 19.03    | 1148.403 | 19.01213 |
| 19.23666 | 1148.403 | 18.78    | 1148.403 | 19.22413 | 1148.403 | 19.03747 | 1148.403 | 19.02    |
| 19.24    | 1148.403 | 18.78771 | 1148.403 | 19.23    | 1148.403 | 19.04    | 1148.403 | 19.02213 |
| 19.24666 | 1148.403 | 18.79    | 1148.403 | 19.23413 | 1148.403 | 19.04747 | 1148.403 | 19.03    |
| 19.25    | 1148.403 | 18.79771 | 1148.403 | 19.24    | 1148.403 | 19.05    | 1148.403 | 19.03213 |
| 19.25666 | 1148.403 | 18.8     | 1148.403 | 19.24413 | 1148.403 | 19.05747 | 1148.403 | 19.04    |
| 19.26    | 1148.403 | 18.80771 | 1148.403 | 19.25    | 1148.403 | 19.06    | 1148.403 | 19.04213 |
| 19.26666 | 1148.403 | 18.81    | 1148.403 | 19.25413 | 1148.403 | 19.06747 | 1148.403 | 19.05    |
| 19.27    | 1148.403 | 18.81771 | 1148.403 | 19.26    | 1148.403 | 19.07    | 1148.403 | 19.05213 |
| 19.27666 | 1148.403 | 18.82    | 1148.403 | 19.26413 | 1148.403 | 19.07747 | 1148.403 | 19.06    |
| 19.28    | 1148.403 | 18.82771 | 1148.403 | 19.27    | 1148.403 | 19.08    | 1148.403 | 19.06213 |
| 19.28666 | 1148.403 | 18.83    | 1148.403 | 19.27413 | 1148.403 | 19.08747 | 1148.403 | 19.07    |
| 19.29    | 1148.403 | 18.83771 | 1148.403 | 19.28    | 1148.403 | 19.09    | 1148.403 | 19.07213 |
| 19.29666 | 1148.403 | 18.84    | 1148.403 | 19.28413 | 1148.403 | 19.09747 | 1148.403 | 19.08    |
| 19.3     | 1148.403 | 18.84771 | 1148.403 | 19.29    | 1148.403 | 19.1     | 1148.403 | 19.08213 |
| 19.30666 | 1148.403 | 18.85    | 1148.403 | 19.29413 | 1148.403 | 19.10747 | 1148.403 | 19.09    |
| 19.31    | 1148.403 | 18.85771 | 1148.403 | 19.3     | 1148.403 | 19.11    | 1148.403 | 19.09213 |
| 19.31666 | 1148.403 | 18.86    | 1148.403 | 19.30413 | 1148.403 | 19.11747 | 1148.403 | 19.1     |
| 19.32    | 1148.403 | 18.86771 | 1148.403 | 19.31    | 1148.403 | 19.12    | 1148.403 | 19.10213 |
| 19.32666 | 1148.403 | 18.87    | 1148.403 | 19.31413 | 1148.403 | 19.12747 | 1148.403 | 19.11    |
| 19.33    | 1148.403 | 18.87771 | 1148.403 | 19.32    | 1148.403 | 19.13    | 1148.403 | 19.11213 |
| 19.33666 | 1148.403 | 18.88    | 1148.403 | 19.32413 | 1148.403 | 19.13747 | 1148.403 | 19.12    |
| 19.34    | 1148.403 | 18.88771 | 1148.403 | 19.33    | 1148.403 | 19.14    | 1148.403 | 19.12213 |
| 19.34666 | 1148.403 | 18.89    | 1148.403 | 19.33413 | 1148.403 | 19.14747 | 1148.403 | 19.13    |
| 19.35    | 1148.403 | 18.89771 | 1148.403 | 19.34    | 1148.403 | 19.15    | 1148.403 | 19.13213 |
| 19.35666 | 1148.403 | 18.9     | 1148.403 | 19.34413 | 1148.403 | 19.15747 | 1148.403 | 19.14    |
| 19.36    | 1148.403 | 18.90771 | 1148.403 | 19.35    | 1148.403 | 19.16    | 1148.403 | 19.14213 |
| 19.36666 | 1148.403 | 18.91    | 1148.403 | 19.35413 | 1148.403 | 19.16747 | 1148.403 | 19.15    |
| 19.37    | 1148.403 | 18.91771 | 1148.403 | 19.36    | 1148.403 | 19.17    | 1148.403 | 19.15213 |
| 19.37666 | 1148.403 | 18.92    | 1148.403 | 19.36413 | 1148.403 | 19.17747 | 1148.403 | 19.16    |
| 19.38    | 1148.403 | 18.92771 | 1148.403 | 19.36585 | 1148.403 | 19.18    | 1148.403 | 19.16213 |
| 19.38666 | 1148.403 | 18.93    | 1148.403 | 19.37    | 1148.403 | 19.18747 | 1148.403 | 19.17    |
| 19.39    | 1148.403 | 18.93771 | 1148.403 | 19.3715  | 1148.403 | 19.19    | 1148.403 | 19.17213 |
| 19.39666 | 1148.403 | 18.94    | 1148.403 | 19.37769 | 1148.403 | 19.19747 | 1148.403 | 19.18    |
| 19.4     | 1148.403 | 18.94771 | 1148.403 | 19.38    | 1148.403 | 19.2     | 1148.403 | 19.18213 |
| 19.40666 | 1148.403 | 18.95    | 1148.403 | 19.38194 | 1148.403 | 19.20747 | 1148.403 | 19.19    |
| 19.41    | 1148.403 | 18.95771 | 1148.403 | 19.39    | 1148.403 | 19.21    | 1148.403 | 19.19213 |
| 19.41666 | 1148.403 | 18.96    | 1148.403 | 19.39135 | 1148.403 | 19.21747 | 1148.403 | 19.2     |
| 19.42    | 1148.403 | 18.96771 | 1148.403 | 19.39961 | 1148.403 | 19.22    | 1148.403 | 19.20213 |
| 19.42666 | 1148.403 | 18.97    | 1148.403 | 19.40118 | 1148.403 | 19.22747 | 1148.403 | 19.21    |
| 19.43    | 1148.403 | 18.97771 | 1148.403 | 19.40945 | 1148.403 | 19.23    | 1148.403 | 19.21213 |

|          |          |          |          |          |          |          |          |          |
|----------|----------|----------|----------|----------|----------|----------|----------|----------|
| 19.43666 | 1148.403 | 18.98    | 1148.403 | 19.41118 | 1148.403 | 19.23747 | 1148.403 | 19.22    |
| 19.44    | 1148.403 | 18.98771 | 1148.403 | 19.41945 | 1148.403 | 19.24    | 1148.403 | 19.22213 |
| 19.44666 | 1148.403 | 18.99    | 1148.403 | 19.42118 | 1148.403 | 19.24747 | 1148.403 | 19.23    |
| 19.45    | 1148.403 | 18.99771 | 1148.403 | 19.42945 | 1148.403 | 19.25    | 1148.403 | 19.23213 |
| 19.45666 | 1148.403 | 19       | 1148.403 | 19.43118 | 1148.403 | 19.25747 | 1148.403 | 19.24    |
| 19.46    | 1148.403 | 19.00771 | 1148.403 | 19.43945 | 1148.403 | 19.26    | 1148.403 | 19.24213 |
| 19.46666 | 1148.403 | 19.01    | 1148.403 | 19.44118 | 1148.403 | 19.26708 | 1148.403 | 19.25    |
| 19.47    | 1148.403 | 19.01771 | 1148.403 | 19.44532 | 1148.403 | 19.27    | 1148.403 | 19.25213 |
| 19.47666 | 1148.403 | 19.02    | 1148.403 | 19.45    | 1148.403 | 19.271   | 1148.403 | 19.26    |
| 19.48    | 1148.403 | 19.02771 | 1148.403 | 19.45473 | 1148.403 | 19.27715 | 1148.403 | 19.26213 |
| 19.48666 | 1148.403 | 19.03    | 1148.403 | 19.46    | 1148.403 | 19.28    | 1148.403 | 19.27    |
| 19.49    | 1148.403 | 19.03771 | 1148.403 | 19.46473 | 1148.403 | 19.28702 | 1148.403 | 19.27213 |
| 19.49666 | 1148.403 | 19.04    | 1148.403 | 19.47    | 1148.403 | 19.28833 | 1148.403 | 19.28    |
| 19.5     | 1148.403 | 19.04771 | 1148.403 | 19.47473 | 1148.403 | 19.28987 | 1148.403 | 19.28213 |
| 19.50666 | 1148.403 | 19.05    | 1148.403 | 19.48    | 1148.403 | 19.29149 | 1148.403 | 19.29    |
| 19.51    | 1148.403 | 19.05771 | 1148.403 | 19.48473 | 1148.403 | 19.3     | 1148.403 | 19.29213 |
| 19.51666 | 1148.403 | 19.06    | 1148.403 | 19.49    | 1148.403 | 19.30149 | 1148.403 | 19.3     |
| 19.52    | 1148.403 | 19.06771 | 1148.403 | 19.49473 | 1148.403 | 19.31    | 1148.403 | 19.30213 |
| 19.52666 | 1148.403 | 19.07    | 1148.403 | 19.5     | 1148.403 | 19.31149 | 1148.403 | 19.31    |
| 19.53    | 1148.403 | 19.07771 | 1148.403 | 19.50473 | 1148.403 | 19.32    | 1148.403 | 19.31213 |
| 19.53666 | 1148.403 | 19.08    | 1148.403 | 19.51    | 1148.403 | 19.32149 | 1148.403 | 19.32    |
| 19.54    | 1148.403 | 19.08771 | 1148.403 | 19.51473 | 1148.403 | 19.33    | 1148.403 | 19.32213 |
| 19.54666 | 1148.403 | 19.09    | 1148.403 | 19.52    | 1148.403 | 19.33149 | 1148.403 | 19.33    |
| 19.55    | 1148.403 | 19.09771 | 1148.403 | 19.52473 | 1148.403 | 19.34    | 1148.403 | 19.33213 |
| 19.55666 | 1148.403 | 19.1     | 1148.403 | 19.53    | 1148.403 | 19.34149 | 1148.403 | 19.34    |
| 19.56    | 1148.403 | 19.10771 | 1148.403 | 19.53473 | 1148.403 | 19.35    | 1148.403 | 19.34213 |
| 19.56666 | 1148.403 | 19.11    | 1148.403 | 19.54    | 1148.403 | 19.35149 | 1148.403 | 19.35    |
| 19.57    | 1148.403 | 19.11771 | 1148.403 | 19.54473 | 1148.403 | 19.36    | 1148.403 | 19.35213 |
| 19.57666 | 1148.403 | 19.12    | 1148.403 | 19.55    | 1148.403 | 19.36149 | 1148.403 | 19.36    |
| 19.58    | 1148.403 | 19.12771 | 1148.403 | 19.55473 | 1148.403 | 19.37    | 1148.403 | 19.36213 |
| 19.58666 | 1148.403 | 19.13    | 1148.403 | 19.56    | 1148.403 | 19.37149 | 1148.403 | 19.37    |
| 19.59    | 1148.403 | 19.13771 | 1148.403 | 19.56473 | 1148.403 | 19.38    | 1148.403 | 19.37213 |
| 19.59666 | 1148.403 | 19.14    | 1148.403 | 19.57    | 1148.403 | 19.38149 | 1148.403 | 19.38    |
| 19.6     | 1148.403 | 19.14771 | 1148.403 | 19.57473 | 1148.403 | 19.39    | 1148.403 | 19.38213 |
| 19.60666 | 1148.403 | 19.15    | 1148.403 | 19.58    | 1148.403 | 19.39149 | 1148.403 | 19.39    |
| 19.61    | 1148.403 | 19.15771 | 1148.403 | 19.58473 | 1148.403 | 19.4     | 1148.403 | 19.39213 |
| 19.61666 | 1148.403 | 19.16    | 1148.403 | 19.59    | 1148.403 | 19.40149 | 1148.403 | 19.4     |
| 19.62    | 1148.403 | 19.16771 | 1148.403 | 19.59473 | 1148.403 | 19.41    | 1148.403 | 19.40213 |
| 19.62666 | 1148.403 | 19.17    | 1148.403 | 19.6     | 1148.403 | 19.41149 | 1148.403 | 19.41    |
| 19.63    | 1148.403 | 19.17771 | 1148.403 | 19.60473 | 1148.403 | 19.42    | 1148.403 | 19.41213 |
| 19.63666 | 1148.403 | 19.18    | 1148.403 | 19.61    | 1148.403 | 19.42149 | 1148.403 | 19.42    |
| 19.64    | 1148.403 | 19.18771 | 1148.403 | 19.61473 | 1148.403 | 19.43    | 1148.403 | 19.42213 |
| 19.64666 | 1148.403 | 19.19    | 1148.403 | 19.62    | 1148.403 | 19.43149 | 1148.403 | 19.43    |
| 19.65    | 1148.403 | 19.19771 | 1148.403 | 19.62473 | 1148.403 | 19.44    | 1148.403 | 19.43213 |
| 19.65666 | 1148.403 | 19.2     | 1148.403 | 19.63    | 1148.403 | 19.44149 | 1148.403 | 19.44    |
| 19.66    | 1148.403 | 19.20771 | 1148.403 | 19.63473 | 1148.403 | 19.45    | 1148.403 | 19.44213 |
| 19.66666 | 1148.403 | 19.21    | 1148.403 | 19.64    | 1148.403 | 19.45149 | 1148.403 | 19.45    |

|          |          |          |          |          |          |          |          |          |
|----------|----------|----------|----------|----------|----------|----------|----------|----------|
| 19.6681  | 1148.403 | 19.21771 | 1148.403 | 19.64473 | 1148.403 | 19.46    | 1148.403 | 19.45213 |
| 19.67    | 1148.403 | 19.22    | 1148.403 | 19.65    | 1148.403 | 19.46149 | 1148.403 | 19.46    |
| 19.67144 | 1148.403 | 19.22771 | 1148.403 | 19.65473 | 1148.403 | 19.47    | 1148.403 | 19.46213 |
| 19.68    | 1148.403 | 19.23    | 1148.403 | 19.66    | 1148.403 | 19.47149 | 1148.403 | 19.47    |
| 19.68144 | 1148.403 | 19.23771 | 1148.403 | 19.66473 | 1148.403 | 19.48    | 1148.403 | 19.47213 |
| 19.69    | 1148.403 | 19.24    | 1148.403 | 19.67    | 1148.403 | 19.48149 | 1148.403 | 19.48    |
| 19.69144 | 1148.403 | 19.24771 | 1148.403 | 19.67473 | 1148.403 | 19.49    | 1148.403 | 19.48213 |
| 19.7     | 1148.403 | 19.24915 | 1148.403 | 19.68    | 1148.403 | 19.49149 | 1148.403 | 19.49    |
| 19.70144 | 1148.403 | 19.25096 | 1148.403 | 19.68473 | 1148.403 | 19.5     | 1148.403 | 19.49213 |
| 19.71    | 1148.403 | 19.25771 | 1148.403 | 19.69    | 1148.403 | 19.50149 | 1148.403 | 19.5     |
| 19.71144 | 1148.403 | 19.26    | 1148.403 | 19.69473 | 1148.403 | 19.51    | 1148.403 | 19.50213 |
| 19.72    | 1148.403 | 19.26771 | 1148.403 | 19.7     | 1148.403 | 19.51149 | 1148.403 | 19.51    |
| 19.72144 | 1148.403 | 19.27    | 1148.403 | 19.70473 | 1148.403 | 19.52    | 1148.403 | 19.51213 |
| 19.73    | 1148.403 | 19.27708 | 1148.403 | 19.71    | 1148.403 | 19.52149 | 1148.403 | 19.52    |
| 19.73144 | 1148.403 | 19.27808 | 1148.403 | 19.71473 | 1148.403 | 19.53    | 1148.403 | 19.52213 |
| 19.74    | 1148.403 | 19.28    | 1148.403 | 19.72    | 1148.403 | 19.53149 | 1148.403 | 19.53    |
| 19.74144 | 1148.403 | 19.28711 | 1148.403 | 19.72473 | 1148.403 | 19.54    | 1148.403 | 19.53213 |
| 19.74285 | 1148.403 | 19.29    | 1148.403 | 19.73    | 1148.403 | 19.54149 | 1148.403 | 19.54    |
| 19.75    | 1148.403 | 19.29699 | 1148.403 | 19.73473 | 1148.403 | 19.55    | 1148.403 | 19.54213 |
| 19.75161 | 1148.403 | 19.3     | 1148.403 | 19.74    | 1148.403 | 19.55149 | 1148.403 | 19.55    |
| 19.76    | 1148.403 | 19.30699 | 1148.403 | 19.74473 | 1148.403 | 19.56    | 1148.403 | 19.55213 |
| 19.76161 | 1148.403 | 19.31    | 1148.403 | 19.75    | 1148.403 | 19.56149 | 1148.403 | 19.56    |
| 19.77    | 1148.403 | 19.31699 | 1148.403 | 19.75473 | 1148.403 | 19.57    | 1148.403 | 19.56213 |
| 19.77161 | 1148.403 | 19.32    | 1148.403 | 19.76    | 1148.403 | 19.57149 | 1148.403 | 19.57    |
| 19.78    | 1148.403 | 19.32699 | 1148.403 | 19.76473 | 1148.403 | 19.58    | 1148.403 | 19.57213 |
| 19.78161 | 1148.403 | 19.33    | 1148.403 | 19.77    | 1148.403 | 19.58149 | 1148.403 | 19.58    |
| 19.79    | 1148.403 | 19.33699 | 1148.403 | 19.77473 | 1148.403 | 19.59    | 1148.403 | 19.58213 |
| 19.79161 | 1148.403 | 19.34    | 1148.403 | 19.78    | 1148.403 | 19.59149 | 1148.403 | 19.59    |
| 19.8     | 1148.403 | 19.34699 | 1148.403 | 19.78473 | 1148.403 | 19.6     | 1148.403 | 19.59213 |
| 19.80161 | 1148.403 | 19.35    | 1148.403 | 19.79    | 1148.403 | 19.60149 | 1148.403 | 19.6     |
| 19.81    | 1148.403 | 19.35699 | 1148.403 | 19.79473 | 1148.403 | 19.61    | 1148.403 | 19.60213 |
| 19.81161 | 1148.403 | 19.36    | 1148.403 | 19.8     | 1148.403 | 19.61149 | 1148.403 | 19.61    |
| 19.82    | 1148.403 | 19.36699 | 1148.403 | 19.80473 | 1148.403 | 19.62    | 1148.403 | 19.61213 |
| 19.82161 | 1148.403 | 19.37    | 1148.403 | 19.81    | 1148.403 | 19.62149 | 1148.403 | 19.62    |
| 19.83    | 1148.403 | 19.37699 | 1148.403 | 19.81473 | 1148.403 | 19.63    | 1148.403 | 19.62213 |
| 19.83161 | 1148.403 | 19.38    | 1148.403 | 19.82    | 1148.403 | 19.63149 | 1148.403 | 19.63    |
| 19.84    | 1148.403 | 19.38699 | 1148.403 | 19.82473 | 1148.403 | 19.64    | 1148.403 | 19.63213 |
| 19.84161 | 1148.403 | 19.39    | 1148.403 | 19.83    | 1148.403 | 19.64149 | 1148.403 | 19.64    |
| 19.85    | 1148.403 | 19.39699 | 1148.403 | 19.83473 | 1148.403 | 19.65    | 1148.403 | 19.64213 |
| 19.85161 | 1148.403 | 19.4     | 1148.403 | 19.84    | 1148.403 | 19.65149 | 1148.403 | 19.65    |
| 19.86    | 1148.403 | 19.40699 | 1148.403 | 19.84473 | 1148.403 | 19.66    | 1148.403 | 19.65213 |
| 19.86161 | 1148.403 | 19.41    | 1148.403 | 19.85    | 1148.403 | 19.66149 | 1148.403 | 19.66    |
| 19.87    | 1148.403 | 19.41699 | 1148.403 | 19.85473 | 1148.403 | 19.67    | 1148.403 | 19.66213 |
| 19.87161 | 1148.403 | 19.42    | 1148.403 | 19.86    | 1148.403 | 19.67149 | 1148.403 | 19.67    |
| 19.88    | 1148.403 | 19.42699 | 1148.403 | 19.86473 | 1148.403 | 19.68    | 1148.403 | 19.67213 |
| 19.88161 | 1148.403 | 19.43    | 1148.403 | 19.87    | 1148.403 | 19.68149 | 1148.403 | 19.68    |
| 19.89    | 1148.403 | 19.43699 | 1148.403 | 19.87473 | 1148.403 | 19.69    | 1148.403 | 19.68213 |

|          |          |          |          |          |          |          |          |          |
|----------|----------|----------|----------|----------|----------|----------|----------|----------|
| 19.89161 | 1148.403 | 19.44    | 1148.403 | 19.88    | 1148.403 | 19.69149 | 1148.403 | 19.69    |
| 19.9     | 1148.403 | 19.44699 | 1148.403 | 19.88473 | 1148.403 | 19.7     | 1148.403 | 19.69213 |
| 19.90161 | 1148.403 | 19.45    | 1148.403 | 19.89    | 1148.403 | 19.70149 | 1148.403 | 19.7     |
| 19.91    | 1148.403 | 19.45699 | 1148.403 | 19.89473 | 1148.403 | 19.71    | 1148.403 | 19.70213 |
| 19.91161 | 1148.403 | 19.46    | 1148.403 | 19.9     | 1148.403 | 19.71149 | 1148.403 | 19.71    |
| 19.92    | 1148.403 | 19.46699 | 1148.403 | 19.90473 | 1148.403 | 19.72    | 1148.403 | 19.71213 |
| 19.92161 | 1148.403 | 19.47    | 1148.403 | 19.91    | 1148.403 | 19.72149 | 1148.403 | 19.72    |
| 19.93    | 1148.403 | 19.47699 | 1148.403 | 19.91473 | 1148.403 | 19.73    | 1148.403 | 19.72213 |
| 19.93161 | 1148.403 | 19.48    | 1148.403 | 19.92    | 1148.403 | 19.73149 | 1148.403 | 19.73    |
| 19.94    | 1148.403 | 19.48699 | 1148.403 | 19.92473 | 1148.403 | 19.74    | 1148.403 | 19.73213 |
| 19.94161 | 1148.403 | 19.49    | 1148.403 | 19.93    | 1148.403 | 19.74149 | 1148.403 | 19.74    |
| 19.95    | 1148.403 | 19.49699 | 1148.403 | 19.93473 | 1148.403 | 19.75    | 1148.403 | 19.74213 |
| 19.95161 | 1148.403 | 19.5     | 1148.403 | 19.94    | 1148.403 | 19.75149 | 1148.403 | 19.75    |
| 19.96    | 1148.403 | 19.50699 | 1148.403 | 19.94473 | 1148.403 | 19.76    | 1148.403 | 19.75213 |
| 19.96161 | 1148.403 | 19.51    | 1148.403 | 19.95    | 1148.403 | 19.76149 | 1148.403 | 19.76    |
| 19.97    | 1148.403 | 19.51699 | 1148.403 | 19.95473 | 1148.403 | 19.77    | 1148.403 | 19.76213 |
| 19.97161 | 1148.403 | 19.52    | 1148.403 | 19.96    | 1148.403 | 19.77149 | 1148.403 | 19.77    |
| 19.98    | 1148.403 | 19.52699 | 1148.403 | 19.96473 | 1148.403 | 19.78    | 1148.403 | 19.77213 |
| 19.98161 | 1148.403 | 19.53    | 1148.403 | 19.97    | 1148.403 | 19.78149 | 1148.403 | 19.78    |
| 19.99    | 1148.403 | 19.53699 | 1148.403 | 19.97473 | 1148.403 | 19.79    | 1148.403 | 19.78213 |
| 19.99161 | 1148.403 | 19.54    | 1148.403 | 19.98    | 1148.403 | 19.79149 | 1148.403 | 19.78661 |
| 20       | 1148.403 | 19.54699 | 1148.403 | 19.98473 | 1148.403 | 19.8     | 1148.403 | 19.79    |
|          |          | 19.55    | 1148.403 | 19.99    | 1148.403 | 19.80149 | 1148.403 | 19.7943  |
|          |          | 19.55699 | 1148.403 | 19.99473 | 1148.403 | 19.81    | 1148.403 | 19.79536 |
|          |          | 19.56    | 1148.403 | 20       | 1148.403 | 19.81149 | 1148.403 | 19.8     |
|          |          | 19.56699 | 1148.403 |          |          | 19.82    | 1148.403 | 19.80103 |
|          |          | 19.57    | 1148.403 |          |          | 19.82149 | 1148.403 | 19.80732 |
|          |          | 19.57699 | 1148.403 |          |          | 19.83    | 1148.403 | 19.81    |
|          |          | 19.58    | 1148.403 |          |          | 19.83149 | 1148.403 | 19.81719 |
|          |          | 19.58699 | 1148.403 |          |          | 19.84    | 1148.403 | 19.82    |
|          |          | 19.59    | 1148.403 |          |          | 19.84149 | 1148.403 | 19.82719 |
|          |          | 19.59699 | 1148.403 |          |          | 19.85    | 1148.403 | 19.83    |
|          |          | 19.6     | 1148.403 |          |          | 19.85149 | 1148.403 | 19.83719 |
|          |          | 19.60699 | 1148.403 |          |          | 19.86    | 1148.403 | 19.84    |
|          |          | 19.61    | 1148.403 |          |          | 19.86149 | 1148.403 | 19.84719 |
|          |          | 19.61699 | 1148.403 |          |          | 19.87    | 1148.403 | 19.85    |
|          |          | 19.62    | 1148.403 |          |          | 19.87149 | 1148.403 | 19.85719 |
|          |          | 19.62699 | 1148.403 |          |          | 19.88    | 1148.403 | 19.86    |
|          |          | 19.63    | 1148.403 |          |          | 19.88149 | 1148.403 | 19.86684 |
|          |          | 19.63699 | 1148.403 |          |          | 19.89    | 1148.403 | 19.87    |
|          |          | 19.64    | 1148.403 |          |          | 19.89149 | 1148.403 | 19.87691 |
|          |          | 19.64699 | 1148.403 |          |          | 19.9     | 1148.403 | 19.88    |
|          |          | 19.65    | 1148.403 |          |          | 19.90149 | 1148.403 | 19.88679 |
|          |          | 19.65699 | 1148.403 |          |          | 19.91    | 1148.403 | 19.89    |
|          |          | 19.66    | 1148.403 |          |          | 19.91149 | 1148.403 | 19.89679 |
|          |          | 19.66699 | 1148.403 |          |          | 19.92    | 1148.403 | 19.9     |
|          |          | 19.67    | 1148.403 |          |          | 19.92149 | 1148.403 | 19.90679 |

|          |          |          |          |          |
|----------|----------|----------|----------|----------|
| 19.67699 | 1148.403 | 19.93    | 1148.403 | 19.91    |
| 19.68    | 1148.403 | 19.93149 | 1148.403 | 19.91679 |
| 19.68699 | 1148.403 | 19.94    | 1148.403 | 19.92    |
| 19.69    | 1148.403 | 19.94149 | 1148.403 | 19.92679 |
| 19.69699 | 1148.403 | 19.95    | 1148.403 | 19.93    |
| 19.7     | 1148.403 | 19.95149 | 1148.403 | 19.93679 |
| 19.70699 | 1148.403 | 19.96    | 1148.403 | 19.94    |
| 19.71    | 1148.403 | 19.96149 | 1148.403 | 19.94679 |
| 19.71699 | 1148.403 | 19.97    | 1148.403 | 19.95    |
| 19.72    | 1148.403 | 19.97149 | 1148.403 | 19.95679 |
| 19.72699 | 1148.403 | 19.98    | 1148.403 | 19.96    |
| 19.73    | 1148.403 | 19.98149 | 1148.403 | 19.96679 |
| 19.73699 | 1148.403 | 19.99    | 1148.403 | 19.97    |
| 19.74    | 1148.403 | 19.99149 | 1148.403 | 19.97679 |
| 19.74699 | 1148.403 | 20       | 1148.403 | 19.98    |
| 19.75    | 1148.403 |          |          | 19.98679 |
| 19.75699 | 1148.403 |          |          | 19.99    |
| 19.76    | 1148.403 |          |          | 19.99679 |
| 19.76699 | 1148.403 |          |          | 20       |
| 19.77    | 1148.403 |          |          |          |
| 19.77699 | 1148.403 |          |          |          |
| 19.78    | 1148.403 |          |          |          |
| 19.78699 | 1148.403 |          |          |          |
| 19.79    | 1148.403 |          |          |          |
| 19.79699 | 1148.403 |          |          |          |
| 19.8     | 1148.403 |          |          |          |
| 19.80699 | 1148.403 |          |          |          |
| 19.81    | 1148.403 |          |          |          |
| 19.81699 | 1148.403 |          |          |          |
| 19.82    | 1148.403 |          |          |          |
| 19.82699 | 1148.403 |          |          |          |
| 19.83    | 1148.403 |          |          |          |
| 19.83699 | 1148.403 |          |          |          |
| 19.84    | 1148.403 |          |          |          |
| 19.84699 | 1148.403 |          |          |          |
| 19.85    | 1148.403 |          |          |          |
| 19.85699 | 1148.403 |          |          |          |
| 19.86    | 1148.403 |          |          |          |
| 19.86699 | 1148.403 |          |          |          |
| 19.87    | 1148.403 |          |          |          |
| 19.87699 | 1148.403 |          |          |          |
| 19.88    | 1148.403 |          |          |          |
| 19.88699 | 1148.403 |          |          |          |
| 19.89    | 1148.403 |          |          |          |
| 19.89699 | 1148.403 |          |          |          |
| 19.9     | 1148.403 |          |          |          |
| 19.90699 | 1148.403 |          |          |          |

|          |          |
|----------|----------|
| 19.91    | 1148.403 |
| 19.91699 | 1148.403 |
| 19.92    | 1148.403 |
| 19.92699 | 1148.403 |
| 19.93    | 1148.403 |
| 19.93699 | 1148.403 |
| 19.94    | 1148.403 |
| 19.94699 | 1148.403 |
| 19.95    | 1148.403 |
| 19.95699 | 1148.403 |
| 19.96    | 1148.403 |
| 19.96699 | 1148.403 |
| 19.97    | 1148.403 |
| 19.97699 | 1148.403 |
| 19.98    | 1148.403 |
| 19.98699 | 1148.403 |
| 19.99    | 1148.403 |
| 19.99699 | 1148.403 |
| 20       | 1148.403 |

|              | L6:9.00s |              | L6:9.00s |              | L6:9.00s |              | L6:9.00s |              |
|--------------|----------|--------------|----------|--------------|----------|--------------|----------|--------------|
|              | L7:9.50s |              | L7:9.60s |              | L7:9.70s |              | L7:9.80s |              |
| J3.om<br>rpm | t<br>s   | J3.om<br>rpm | t<br>s   | J3.om<br>rpm | t<br>s   | J3.om<br>rpm | t<br>s   | J3.om<br>rpm |
| 1152.51      | 0        | 1152.51      | 0        | 1152.51      | 0        | 1152.51      | 0        | 1152.51      |
| 1152.51      | 0.006678 | 1152.51      | 0.006678 | 1152.51      | 0.006678 | 1152.51      | 0.006678 | 1152.51      |
| 1152.51      | 0.01     | 1152.51      | 0.01     | 1152.51      | 0.01     | 1152.51      | 0.01     | 1152.51      |
| 1152.51      | 0.016678 | 1152.51      | 0.016678 | 1152.51      | 0.016678 | 1152.51      | 0.016678 | 1152.51      |
| 1152.51      | 0.02     | 1152.51      | 0.02     | 1152.51      | 0.02     | 1152.51      | 0.02     | 1152.51      |
| 1152.51      | 0.026678 | 1152.51      | 0.026678 | 1152.51      | 0.026678 | 1152.51      | 0.026678 | 1152.51      |
| 1152.51      | 0.03     | 1152.51      | 0.03     | 1152.51      | 0.03     | 1152.51      | 0.03     | 1152.51      |
| 1152.51      | 0.036678 | 1152.51      | 0.036678 | 1152.51      | 0.036678 | 1152.51      | 0.036678 | 1152.51      |
| 1152.51      | 0.04     | 1152.51      | 0.04     | 1152.51      | 0.04     | 1152.51      | 0.04     | 1152.51      |
| 1152.51      | 0.046678 | 1152.51      | 0.046678 | 1152.51      | 0.046678 | 1152.51      | 0.046678 | 1152.51      |
| 1152.51      | 0.05     | 1152.51      | 0.05     | 1152.51      | 0.05     | 1152.51      | 0.05     | 1152.51      |
| 1152.51      | 0.056678 | 1152.51      | 0.056678 | 1152.51      | 0.056678 | 1152.51      | 0.056678 | 1152.51      |
| 1152.51      | 0.06     | 1152.51      | 0.06     | 1152.51      | 0.06     | 1152.51      | 0.06     | 1152.51      |
| 1152.51      | 0.066678 | 1152.51      | 0.066678 | 1152.51      | 0.066678 | 1152.51      | 0.066678 | 1152.51      |
| 1152.51      | 0.07     | 1152.51      | 0.07     | 1152.51      | 0.07     | 1152.51      | 0.07     | 1152.51      |
| 1152.51      | 0.076678 | 1152.51      | 0.076678 | 1152.51      | 0.076678 | 1152.51      | 0.076678 | 1152.51      |
| 1152.51      | 0.08     | 1152.51      | 0.08     | 1152.51      | 0.08     | 1152.51      | 0.08     | 1152.51      |
| 1152.51      | 0.086678 | 1152.51      | 0.086678 | 1152.51      | 0.086678 | 1152.51      | 0.086678 | 1152.51      |
| 1152.51      | 0.09     | 1152.51      | 0.09     | 1152.51      | 0.09     | 1152.51      | 0.09     | 1152.51      |
| 1152.51      | 0.096678 | 1152.51      | 0.096678 | 1152.51      | 0.096678 | 1152.51      | 0.096678 | 1152.51      |
| 1152.51      | 0.1      | 1152.51      | 0.1      | 1152.51      | 0.1      | 1152.51      | 0.1      | 1152.51      |
| 1152.51      | 0.106678 | 1152.51      | 0.106678 | 1152.51      | 0.106678 | 1152.51      | 0.106678 | 1152.51      |
| 1152.51      | 0.11     | 1152.51      | 0.11     | 1152.51      | 0.11     | 1152.51      | 0.11     | 1152.51      |
| 1152.51      | 0.116678 | 1152.51      | 0.116678 | 1152.51      | 0.116678 | 1152.51      | 0.116678 | 1152.51      |
| 1152.51      | 0.12     | 1152.51      | 0.12     | 1152.51      | 0.12     | 1152.51      | 0.12     | 1152.51      |
| 1152.51      | 0.126678 | 1152.51      | 0.126678 | 1152.51      | 0.126678 | 1152.51      | 0.126678 | 1152.51      |
| 1152.51      | 0.13     | 1152.51      | 0.13     | 1152.51      | 0.13     | 1152.51      | 0.13     | 1152.51      |
| 1152.51      | 0.136678 | 1152.51      | 0.136678 | 1152.51      | 0.136678 | 1152.51      | 0.136678 | 1152.51      |
| 1152.51      | 0.14     | 1152.51      | 0.14     | 1152.51      | 0.14     | 1152.51      | 0.14     | 1152.51      |
| 1152.51      | 0.146678 | 1152.51      | 0.146678 | 1152.51      | 0.146678 | 1152.51      | 0.146678 | 1152.51      |
| 1152.51      | 0.15     | 1152.51      | 0.15     | 1152.51      | 0.15     | 1152.51      | 0.15     | 1152.51      |
| 1152.51      | 0.156678 | 1152.51      | 0.156678 | 1152.51      | 0.156678 | 1152.51      | 0.156678 | 1152.51      |
| 1152.51      | 0.16     | 1152.51      | 0.16     | 1152.51      | 0.16     | 1152.51      | 0.16     | 1152.51      |
| 1152.51      | 0.166678 | 1152.51      | 0.166678 | 1152.51      | 0.166678 | 1152.51      | 0.166678 | 1152.51      |
| 1152.51      | 0.17     | 1152.51      | 0.17     | 1152.51      | 0.17     | 1152.51      | 0.17     | 1152.51      |
| 1152.51      | 0.176678 | 1152.51      | 0.176678 | 1152.51      | 0.176678 | 1152.51      | 0.176678 | 1152         |



[illegible]

[illegible]

[illegible]

[illegible]

[illegible]

[illegible]

[illegible]

[illegible]



[illegible]

[illegible]

[illegible]

[illegible]

[illegible]

|         |          |         |          |         |          |         |          |         |
|---------|----------|---------|----------|---------|----------|---------|----------|---------|
| 1152.51 | 8.91     | 1152.51 | 8.91     | 1152.51 | 8.91     | 1152.51 | 8.91     | 1152.51 |
| 1152.51 | 8.916678 | 1152.51 | 8.916678 | 1152.51 | 8.916678 | 1152.51 | 8.916678 | 1152.51 |
| 1152.51 | 8.92     | 1152.51 | 8.92     | 1152.51 | 8.92     | 1152.51 | 8.92     | 1152.51 |
| 1152.51 | 8.926678 | 1152.51 | 8.926678 | 1152.51 | 8.926678 | 1152.51 | 8.926678 | 1152.51 |
| 1152.51 | 8.93     | 1152.51 | 8.93     | 1152.51 | 8.93     | 1152.51 | 8.93     | 1152.51 |
| 1152.51 | 8.936678 | 1152.51 | 8.936678 | 1152.51 | 8.936678 | 1152.51 | 8.936678 | 1152.51 |
| 1152.51 | 8.94     | 1152.51 | 8.94     | 1152.51 | 8.94     | 1152.51 | 8.94     | 1152.51 |
| 1152.51 | 8.946678 | 1152.51 | 8.946678 | 1152.51 | 8.946678 | 1152.51 | 8.946678 | 1152.51 |
| 1152.51 | 8.95     | 1152.51 | 8.95     | 1152.51 | 8.95     | 1152.51 | 8.95     | 1152.51 |
| 1152.51 | 8.956678 | 1152.51 | 8.956678 | 1152.51 | 8.956678 | 1152.51 | 8.956678 | 1152.51 |
| 1152.51 | 8.96     | 1152.51 | 8.96     | 1152.51 | 8.96     | 1152.51 | 8.96     | 1152.51 |
| 1152.51 | 8.966678 | 1152.51 | 8.966678 | 1152.51 | 8.966678 | 1152.51 | 8.966678 | 1152.51 |
| 1152.51 | 8.97     | 1152.51 | 8.97     | 1152.51 | 8.97     | 1152.51 | 8.97     | 1152.51 |
| 1152.51 | 8.976678 | 1152.51 | 8.976678 | 1152.51 | 8.976678 | 1152.51 | 8.976678 | 1152.51 |
| 1152.51 | 8.98     | 1152.51 | 8.98     | 1152.51 | 8.98     | 1152.51 | 8.98     | 1152.51 |
| 1152.51 | 8.986678 | 1152.51 | 8.986678 | 1152.51 | 8.986678 | 1152.51 | 8.986678 | 1152.51 |
| 1152.51 | 8.99     | 1152.51 | 8.99     | 1152.51 | 8.99     | 1152.51 | 8.99     | 1152.51 |
| 1152.51 | 8.996678 | 1152.51 | 8.996678 | 1152.51 | 8.996678 | 1152.51 | 8.996678 | 1152.51 |
| 1152.51 | 8.999732 | 1152.51 | 8.999732 | 1152.51 | 8.999732 | 1152.51 | 8.999732 | 1152.51 |
| 1152.51 | 9.000827 | 1152.51 | 9.000827 | 1152.51 | 9.000827 | 1152.51 | 9.000827 | 1152.51 |
| 1152.51 | 9.00225  | 1152.51 | 9.00225  | 1152.51 | 9.00225  | 1152.51 | 9.00225  | 1152.51 |
| 1152.51 | 9.003299 | 1152.51 | 9.003299 | 1152.51 | 9.003299 | 1152.51 | 9.003299 | 1152.51 |
| 1152.51 | 9.005134 | 1152.51 | 9.005134 | 1152.51 | 9.005134 | 1152.51 | 9.005134 | 1152.51 |
| 1152.51 | 9.00674  | 1152.51 | 9.00674  | 1152.51 | 9.00674  | 1152.51 | 9.00674  | 1152.51 |
| 1152.51 | 9.008186 | 1152.51 | 9.008186 | 1152.51 | 9.008186 | 1152.51 | 9.008186 | 1152.51 |
| 1152.51 | 9.009631 | 1152.51 | 9.009631 | 1152.51 | 9.009631 | 1152.51 | 9.009631 | 1152.51 |
| 1152.51 | 9.011242 | 1152.51 | 9.011242 | 1152.51 | 9.011242 | 1152.51 | 9.011242 | 1152.51 |
| 1152.51 | 9.013132 | 1152.51 | 9.013132 | 1152.51 | 9.013132 | 1152.51 | 9.013132 | 1152.51 |
| 1152.51 | 9.014215 | 1152.51 | 9.014215 | 1152.51 | 9.014215 | 1152.51 | 9.014215 | 1152.51 |
| 1152.51 | 9.015298 | 1152.51 | 9.015298 | 1152.51 | 9.015298 | 1152.51 | 9.015298 | 1152.51 |
| 1152.51 | 9.016381 | 1152.51 | 9.016381 | 1152.51 | 9.016381 | 1152.51 | 9.016381 | 1152.51 |
| 1152.51 | 9.017464 | 1152.51 | 9.017464 | 1152.51 | 9.017464 | 1152.51 | 9.017464 | 1152.51 |
| 1152.51 | 9.02     | 1152.51 | 9.02     | 1152.51 | 9.02     | 1152.51 | 9.02     | 1152.51 |
| 1152.51 | 9.021331 | 1152.51 | 9.021331 | 1152.51 | 9.021331 | 1152.51 | 9.021331 | 1152.51 |
| 1152.51 | 9.022559 | 1152.51 | 9.022559 | 1152.51 | 9.022559 | 1152.51 | 9.022559 | 1152.51 |
| 1152.51 | 9.023992 | 1152.51 | 9.023992 | 1152.51 | 9.023992 | 1152.51 | 9.023992 | 1152.51 |
| 1152.51 | 9.025246 | 1152.51 | 9.025246 | 1152.51 | 9.025246 | 1152.51 |          |         |

|         |          |         |          |         |          |         |          |         |
|---------|----------|---------|----------|---------|----------|---------|----------|---------|
| 1152.51 | 9.041084 | 1152.51 | 9.041084 | 1152.51 | 9.041084 | 1152.51 | 9.041084 | 1152.51 |
| 1152.51 | 9.043012 | 1152.51 | 9.043012 | 1152.51 | 9.043012 | 1152.51 | 9.043012 | 1152.51 |
| 1152.51 | 9.045662 | 1152.51 | 9.045662 | 1152.51 | 9.045662 | 1152.51 | 9.045662 | 1152.51 |
| 1152.51 | 9.047349 | 1152.51 | 9.047349 | 1152.51 | 9.047349 | 1152.51 | 9.047349 | 1152.51 |
| 1152.51 | 9.049036 | 1152.51 | 9.049036 | 1152.51 | 9.049036 | 1152.51 | 9.049036 | 1152.51 |
| 1152.51 | 9.050241 | 1152.51 | 9.050241 | 1152.51 | 9.050241 | 1152.51 | 9.050241 | 1152.51 |
| 1152.51 | 9.0517   | 1152.51 | 9.0517   | 1152.51 | 9.0517   | 1152.51 | 9.0517   | 1152.51 |
| 1152.51 | 9.053012 | 1152.51 | 9.053012 | 1152.51 | 9.053012 | 1152.51 | 9.053012 | 1152.51 |
| 1152.51 | 9.054817 | 1152.51 | 9.054817 | 1152.51 | 9.054817 | 1152.51 | 9.054817 | 1152.51 |
| 1152.51 | 9.055966 | 1152.51 | 9.055966 | 1152.51 | 9.055966 | 1152.51 | 9.055966 | 1152.51 |
| 1152.51 | 9.057114 | 1152.51 | 9.057114 | 1152.51 | 9.057114 | 1152.51 | 9.057114 | 1152.51 |
| 1152.51 | 9.059124 | 1152.51 | 9.059124 | 1152.51 | 9.059124 | 1152.51 | 9.059124 | 1152.51 |
| 1152.51 | 9.060287 | 1152.51 | 9.060287 | 1152.51 | 9.060287 | 1152.51 | 9.060287 | 1152.51 |
| 1152.51 | 9.061663 | 1152.51 | 9.061663 | 1152.51 | 9.061663 | 1152.51 | 9.061663 | 1152.51 |
| 1152.51 | 9.063011 | 1152.51 | 9.063011 | 1152.51 | 9.063011 | 1152.51 | 9.063011 | 1152.51 |
| 1152.51 | 9.06419  | 1152.51 | 9.06419  | 1152.51 | 9.06419  | 1152.51 | 9.06419  | 1152.51 |
| 1152.51 | 9.066255 | 1152.51 | 9.066255 | 1152.51 | 9.066255 | 1152.51 | 9.066255 | 1152.51 |
| 1152.51 | 9.068319 | 1152.51 | 9.068319 | 1152.51 | 9.068319 | 1152.51 | 9.068319 | 1152.51 |
| 1152.51 | 9.07     | 1152.51 | 9.07     | 1152.51 | 9.07     | 1152.51 | 9.07     | 1152.51 |
| 1152.51 | 9.071146 | 1152.51 | 9.071146 | 1152.51 | 9.071146 | 1152.51 | 9.071146 | 1152.51 |
| 1152.51 | 9.072284 | 1152.51 | 9.072284 | 1152.51 | 9.072284 | 1152.51 | 9.072284 | 1152.51 |
| 1152.51 | 9.076314 | 1152.51 | 9.076314 | 1152.51 | 9.076314 | 1152.51 | 9.076314 | 1152.51 |
| 1152.51 | 9.079001 | 1152.51 | 9.079001 | 1152.51 | 9.079001 | 1152.51 | 9.079001 | 1152.51 |
| 1152.51 | 9.080384 | 1152.51 | 9.080384 | 1152.51 | 9.080384 | 1152.51 | 9.080384 | 1152.51 |
| 1152.51 | 9.083072 | 1152.51 | 9.083072 | 1152.51 | 9.083072 | 1152.51 | 9.083072 | 1152.51 |
| 1152.51 | 9.085759 | 1152.51 | 9.085759 | 1152.51 | 9.085759 | 1152.51 | 9.085759 | 1152.51 |
| 1152.51 | 9.088178 | 1152.51 | 9.088178 | 1152.51 | 9.088178 | 1152.51 | 9.088178 | 1152.51 |
| 1152.51 | 9.09     | 1152.51 | 9.09     | 1152.51 | 9.09     | 1152.51 | 9.09     | 1152.51 |
| 1152.51 | 9.092765 | 1152.51 | 9.092765 | 1152.51 | 9.092765 | 1152.51 | 9.092765 | 1152.51 |
| 1152.51 | 9.094862 | 1152.51 | 9.094862 | 1152.51 | 9.094862 | 1152.51 | 9.094862 | 1152.51 |
| 1152.51 | 9.09696  | 1152.51 | 9.09696  | 1152.51 | 9.09696  | 1152.51 | 9.09696  | 1152.51 |
| 1152.51 | 9.099058 | 1152.51 | 9.099058 | 1152.51 | 9.099058 | 1152.51 | 9.099058 | 1152.51 |
| 1152.51 | 9.1003   | 1152.51 | 9.1003   | 1152.51 | 9.1003   | 1152.51 | 9.1003   | 1152.51 |
| 1152.51 | 9.102397 | 1152.51 | 9.102397 | 1152.51 | 9.102397 | 1152.51 | 9.102397 | 1152.51 |
| 1152.51 | 9.104378 | 1152.51 | 9.104378 | 1152.51 | 9.104378 | 1152.51 | 9.104378 | 1152.51 |
| 1152.51 | 9.106358 | 1152.51 | 9.106358 | 1152.51 | 9.106358 | 1152.51 |          |         |

|         |          |         |          |         |          |         |          |         |
|---------|----------|---------|----------|---------|----------|---------|----------|---------|
| 1152.51 | 9.13     | 1152.51 | 9.13     | 1152.51 | 9.13     | 1152.51 | 9.13     | 1152.51 |
| 1152.51 | 9.132014 | 1152.51 | 9.132014 | 1152.51 | 9.132014 | 1152.51 | 9.132014 | 1152.51 |
| 1152.51 | 9.13367  | 1152.51 | 9.13367  | 1152.51 | 9.13367  | 1152.51 | 9.13367  | 1152.51 |
| 1152.51 | 9.135326 | 1152.51 | 9.135326 | 1152.51 | 9.135326 | 1152.51 | 9.135326 | 1152.51 |
| 1152.51 | 9.136981 | 1152.51 | 9.136981 | 1152.51 | 9.136981 | 1152.51 | 9.136981 | 1152.51 |
| 1152.51 | 9.14     | 1152.51 | 9.14     | 1152.51 | 9.14     | 1152.51 | 9.14     | 1152.51 |
| 1152.51 | 9.141892 | 1152.51 | 9.141892 | 1152.51 | 9.141892 | 1152.51 | 9.141892 | 1152.51 |
| 1152.51 | 9.143443 | 1152.51 | 9.143443 | 1152.51 | 9.143443 | 1152.51 | 9.143443 | 1152.51 |
| 1152.51 | 9.144994 | 1152.51 | 9.144994 | 1152.51 | 9.144994 | 1152.51 | 9.144994 | 1152.51 |
| 1152.51 | 9.146545 | 1152.51 | 9.146545 | 1152.51 | 9.146545 | 1152.51 | 9.146545 | 1152.51 |
| 1152.51 | 9.15     | 1152.51 | 9.15     | 1152.51 | 9.15     | 1152.51 | 9.15     | 1152.51 |
| 1152.51 | 9.151772 | 1152.51 | 9.151772 | 1152.51 | 9.151772 | 1152.51 | 9.151772 | 1152.51 |
| 1152.51 | 9.15322  | 1152.51 | 9.15322  | 1152.51 | 9.15322  | 1152.51 | 9.15322  | 1152.51 |
| 1152.51 | 9.154668 | 1152.51 | 9.154668 | 1152.51 | 9.154668 | 1152.51 | 9.154668 | 1152.51 |
| 1152.51 | 9.156116 | 1152.51 | 9.156116 | 1152.51 | 9.156116 | 1152.51 | 9.156116 | 1152.51 |
| 1152.51 | 9.16     | 1152.51 | 9.16     | 1152.51 | 9.16     | 1152.51 | 9.16     | 1152.51 |
| 1152.51 | 9.161655 | 1152.51 | 9.161655 | 1152.51 | 9.161655 | 1152.51 | 9.161655 | 1152.51 |
| 1152.51 | 9.163002 | 1152.51 | 9.163002 | 1152.51 | 9.163002 | 1152.51 | 9.163002 | 1152.51 |
| 1152.51 | 9.164349 | 1152.51 | 9.164349 | 1152.51 | 9.164349 | 1152.51 | 9.164349 | 1152.51 |
| 1152.51 | 9.165696 | 1152.51 | 9.165696 | 1152.51 | 9.165696 | 1152.51 | 9.165696 | 1152.51 |
| 1152.51 | 9.17     | 1152.51 | 9.17     | 1152.51 | 9.17     | 1152.51 | 9.17     | 1152.51 |
| 1152.51 | 9.17154  | 1152.51 | 9.17154  | 1152.51 | 9.17154  | 1152.51 | 9.17154  | 1152.51 |
| 1152.51 | 9.172789 | 1152.51 | 9.172789 | 1152.51 | 9.172789 | 1152.51 | 9.172789 | 1152.51 |
| 1152.51 | 9.174038 | 1152.51 | 9.174038 | 1152.51 | 9.174038 | 1152.51 | 9.174038 | 1152.51 |
| 1152.51 | 9.175288 | 1152.51 | 9.175288 | 1152.51 | 9.175288 | 1152.51 | 9.175288 | 1152.51 |
| 1152.51 | 9.179661 | 1152.51 | 9.179661 | 1152.51 | 9.179661 | 1152.51 | 9.179661 | 1152.51 |
| 1152.51 | 9.18121  | 1152.51 | 9.18121  | 1152.51 | 9.18121  | 1152.51 | 9.18121  | 1152.51 |
| 1152.51 | 9.182235 | 1152.51 | 9.182235 | 1152.51 | 9.182235 | 1152.51 | 9.182235 | 1152.51 |
| 1152.51 | 9.18326  | 1152.51 | 9.18326  | 1152.51 | 9.18326  | 1152.51 | 9.18326  | 1152.51 |
| 1152.51 | 9.185053 | 1152.51 | 9.185053 | 1152.51 | 9.185053 | 1152.51 | 9.185053 | 1152.51 |
| 1152.51 | 9.186526 | 1152.51 | 9.186526 | 1152.51 | 9.186526 | 1152.51 | 9.186526 | 1152.51 |
| 1152.51 | 9.187998 | 1152.51 | 9.187998 | 1152.51 | 9.187998 | 1152.51 | 9.187998 | 1152.51 |
| 1152.51 | 9.189471 | 1152.51 | 9.189471 | 1152.51 | 9.189471 | 1152.51 | 9.189471 | 1152.51 |
| 1152.51 | 9.191683 | 1152.51 | 9.191683 | 1152.51 | 9.191683 | 1152.51 | 9.191683 | 1152.51 |
| 1152.51 | 9.193155 | 1152.51 | 9.193155 | 1152.51 | 9.193155 | 1152.51 | 9.193155 | 1152.51 |
| 1152.51 | 9.194377 | 1152.51 | 9.194377 | 1152.51 | 9.194377 | 1152.51 | 9.194377 | 1152.51 |
| 1152.51 | 9.       |         |          |         |          |         |          |         |



|         |          |         |          |         |          |         |          |         |
|---------|----------|---------|----------|---------|----------|---------|----------|---------|
| 1152.51 | 9.212637 | 1152.51 | 9.212637 | 1152.51 | 9.212637 | 1152.51 | 9.212637 | 1152.51 |
| 1152.51 | 9.213739 | 1152.51 | 9.213739 | 1152.51 | 9.213739 | 1152.51 | 9.213739 | 1152.51 |
| 1152.51 | 9.21484  | 1152.51 | 9.21484  | 1152.51 | 9.21484  | 1152.51 | 9.21484  | 1152.51 |
| 1152.51 | 9.215942 | 1152.51 | 9.215942 | 1152.51 | 9.215942 | 1152.51 | 9.215942 | 1152.51 |
| 1152.51 | 9.21787  | 1152.51 | 9.21787  | 1152.51 | 9.21787  | 1152.51 | 9.21787  | 1152.51 |
| 1152.51 | 9.219798 | 1152.51 | 9.219798 | 1152.51 | 9.219798 | 1152.51 | 9.219798 | 1152.51 |
| 1152.51 | 9.221278 | 1152.51 | 9.221278 | 1152.51 | 9.221278 | 1152.51 | 9.221278 | 1152.51 |
| 1152.51 | 9.222394 | 1152.51 | 9.222394 | 1152.51 | 9.222394 | 1152.51 | 9.222394 | 1152.51 |
| 1152.51 | 9.223398 | 1152.51 | 9.223398 | 1152.51 | 9.223398 | 1152.51 | 9.223398 | 1152.51 |
| 1152.51 | 9.224403 | 1152.51 | 9.224403 | 1152.51 | 9.224403 | 1152.51 | 9.224403 | 1152.51 |
| 1152.51 | 9.225408 | 1152.51 | 9.225408 | 1152.51 | 9.225408 | 1152.51 | 9.225408 | 1152.51 |
| 1152.51 | 9.227166 | 1152.51 | 9.227166 | 1152.51 | 9.227166 | 1152.51 | 9.227166 | 1152.51 |
| 1152.51 | 9.228924 | 1152.51 | 9.228924 | 1152.51 | 9.228924 | 1152.51 | 9.228924 | 1152.51 |
| 1152.51 | 9.23     | 1152.51 | 9.23     | 1152.51 | 9.23     | 1152.51 | 9.23     | 1152.51 |
| 1152.51 | 9.23118  | 1152.51 | 9.23118  | 1152.51 | 9.23118  | 1152.51 | 9.23118  | 1152.51 |
| 1152.51 | 9.232214 | 1152.51 | 9.232214 | 1152.51 | 9.232214 | 1152.51 | 9.232214 | 1152.51 |
| 1152.51 | 9.234076 | 1152.51 | 9.234076 | 1152.51 | 9.234076 | 1152.51 | 9.234076 | 1152.51 |
| 1152.51 | 9.235111 | 1152.51 | 9.235111 | 1152.51 | 9.235111 | 1152.51 | 9.235111 | 1152.51 |
| 1152.51 | 9.24     | 1152.51 | 9.24     | 1152.51 | 9.24     | 1152.51 | 9.24     | 1152.51 |
| 1152.51 | 9.241016 | 1152.51 | 9.241016 | 1152.51 | 9.241016 | 1152.51 | 9.241016 | 1152.51 |
| 1152.51 | 9.247236 | 1152.51 | 9.247236 | 1152.51 | 9.247236 | 1152.51 | 9.247236 | 1152.51 |
| 1152.51 | 9.25     | 1152.51 | 9.25     | 1152.51 | 9.25     | 1152.51 | 9.25     | 1152.51 |
| 1152.51 | 9.257109 | 1152.51 | 9.257109 | 1152.51 | 9.257109 | 1152.51 | 9.257109 | 1152.51 |
| 1152.51 | 9.26     | 1152.51 | 9.26     | 1152.51 | 9.26     | 1152.51 | 9.26     | 1152.51 |
| 1152.51 | 9.267109 | 1152.51 | 9.267109 | 1152.51 | 9.267109 | 1152.51 | 9.267109 | 1152.51 |
| 1152.51 | 9.27     | 1152.51 | 9.27     | 1152.51 | 9.27     | 1152.51 | 9.27     | 1152.51 |
| 1152.51 | 9.277109 | 1152.51 | 9.277109 | 1152.51 | 9.277109 | 1152.51 | 9.277109 | 1152.51 |
| 1152.51 | 9.28     | 1152.51 | 9.28     | 1152.51 | 9.28     | 1152.51 | 9.28     | 1152.51 |
| 1152.51 | 9.287109 | 1152.51 | 9.287109 | 1152.51 | 9.287109 | 1152.51 | 9.287109 | 1152.51 |
| 1152.51 | 9.29     | 1152.51 | 9.29     | 1152.51 | 9.29     | 1152.51 | 9.29     | 1152.51 |
| 1152.51 | 9.297109 | 1152.51 | 9.297109 | 1152.51 | 9.297109 | 1152.51 | 9.297109 | 1152.51 |
| 1152.51 | 9.3      | 1152.51 | 9.3      | 1152.51 | 9.3      | 1152.51 | 9.3      | 1152.51 |
| 1152.51 | 9.307109 | 1152.51 | 9.307109 | 1152.51 | 9.307109 | 1152.51 | 9.307109 | 1152.51 |
| 1152.51 | 9.31     | 1152.51 | 9.31     | 1152.51 | 9.31     | 1152.51 | 9.31     | 1152.51 |
| 1152.51 | 9.317109 | 1152.51 | 9.317109 | 1152.51 | 9.317109 | 1152.51 | 9.317109 | 1152.51 |
| 1152.51 | 9.32     | 1152.51 | 9.32     | 1152.51 | 9.32     | 1152.51 | 9.32     | 1152.51 |
| 1152.51 | 9.327109 | 1152.51 | 9.327109 | 1152.51 | 9.327109 | 1152.51 | 9.3      |         |

|          |          |         |          |         |          |         |          |         |
|----------|----------|---------|----------|---------|----------|---------|----------|---------|
| 1152.51  | 9.38     | 1152.51 | 9.38     | 1152.51 | 9.38     | 1152.51 | 9.38     | 1152.51 |
| 1152.51  | 9.387109 | 1152.51 | 9.387109 | 1152.51 | 9.387109 | 1152.51 | 9.387109 | 1152.51 |
| 1152.51  | 9.39     | 1152.51 | 9.39     | 1152.51 | 9.39     | 1152.51 | 9.39     | 1152.51 |
| 1152.51  | 9.397109 | 1152.51 | 9.397109 | 1152.51 | 9.397109 | 1152.51 | 9.397109 | 1152.51 |
| 1152.51  | 9.4      | 1152.51 | 9.4      | 1152.51 | 9.4      | 1152.51 | 9.4      | 1152.51 |
| 1152.51  | 9.407109 | 1152.51 | 9.407109 | 1152.51 | 9.407109 | 1152.51 | 9.407109 | 1152.51 |
| 1152.51  | 9.41     | 1152.51 | 9.41     | 1152.51 | 9.41     | 1152.51 | 9.41     | 1152.51 |
| 1152.51  | 9.417109 | 1152.51 | 9.417109 | 1152.51 | 9.417109 | 1152.51 | 9.417109 | 1152.51 |
| 1152.51  | 9.42     | 1152.51 | 9.42     | 1152.51 | 9.42     | 1152.51 | 9.42     | 1152.51 |
| 1152.51  | 9.427109 | 1152.51 | 9.427109 | 1152.51 | 9.427109 | 1152.51 | 9.427109 | 1152.51 |
| 1152.51  | 9.43     | 1152.51 | 9.43     | 1152.51 | 9.43     | 1152.51 | 9.43     | 1152.51 |
| 1152.51  | 9.437109 | 1152.51 | 9.437109 | 1152.51 | 9.437109 | 1152.51 | 9.437109 | 1152.51 |
| 1152.51  | 9.44     | 1152.51 | 9.44     | 1152.51 | 9.44     | 1152.51 | 9.44     | 1152.51 |
| 1152.51  | 9.447109 | 1152.51 | 9.447109 | 1152.51 | 9.447109 | 1152.51 | 9.447109 | 1152.51 |
| 1152.51  | 9.45     | 1152.51 | 9.45     | 1152.51 | 9.45     | 1152.51 | 9.45     | 1152.51 |
| 1152.51  | 9.457109 | 1152.51 | 9.457109 | 1152.51 | 9.457109 | 1152.51 | 9.457109 | 1152.51 |
| 1152.51  | 9.46     | 1152.51 | 9.46     | 1152.51 | 9.46     | 1152.51 | 9.46     | 1152.51 |
| 1152.51  | 9.467109 | 1152.51 | 9.467109 | 1152.51 | 9.467109 | 1152.51 | 9.467109 | 1152.51 |
| 1152.51  | 9.47     | 1152.51 | 9.47     | 1152.51 | 9.47     | 1152.51 | 9.47     | 1152.51 |
| 1152.51  | 9.477109 | 1152.51 | 9.477109 | 1152.51 | 9.477109 | 1152.51 | 9.477109 | 1152.51 |
| 1152.51  | 9.48     | 1152.51 | 9.48     | 1152.51 | 9.48     | 1152.51 | 9.48     | 1152.51 |
| 1152.51  | 9.487109 | 1152.51 | 9.487109 | 1152.51 | 9.487109 | 1152.51 | 9.487109 | 1152.51 |
| 1152.51  | 9.49     | 1152.51 | 9.49     | 1152.51 | 9.49     | 1152.51 | 9.49     | 1152.51 |
| 1152.51  | 9.497109 | 1152.51 | 9.497109 | 1152.51 | 9.497109 | 1152.51 | 9.497109 | 1152.51 |
| 1152.51  | 9.498439 | 1152.51 | 9.5      | 1152.51 | 9.5      | 1152.51 | 9.5      | 1152.51 |
| 1152.51  | 9.499654 | 1152.51 | 9.507109 | 1152.51 | 9.507109 | 1152.51 | 9.507109 | 1152.51 |
| 1152.51  | 9.500669 | 1152.51 | 9.51     | 1152.51 | 9.51     | 1152.51 | 9.51     | 1152.51 |
| 1152.51  | 9.501793 | 1152.51 | 9.517109 | 1152.51 | 9.517109 | 1152.51 | 9.517109 | 1152.51 |
| 1152.51  | 9.503708 | 1152.51 | 9.52     | 1152.51 | 9.52     | 1152.51 | 9.52     | 1152.51 |
| 1152.511 | 9.504732 | 1152.51 | 9.527109 | 1152.51 | 9.527109 | 1152.51 | 9.527109 | 1152.51 |
| 1152.511 | 9.505755 | 1152.51 | 9.53     | 1152.51 | 9.53     | 1152.51 | 9.53     | 1152.51 |
| 1152.51  | 9.506778 | 1152.51 | 9.537109 | 1152.51 | 9.537109 | 1152.51 | 9.537109 | 1152.51 |
| 1152.509 | 9.508415 | 1152.51 | 9.54     | 1152.51 | 9.54     | 1152.51 | 9.54     | 1152.51 |
| 1152.509 | 9.51     | 1152.51 | 9.547109 | 1152.51 | 9.547109 | 1152.51 | 9.547109 | 1152.51 |
| 1152.51  | 9.511214 | 1152.51 | 9.55     | 1152.51 | 9.55     | 1152.51 | 9.55     | 1152.51 |
| 1152.509 | 9.513124 | 1152.51 | 9.557109 | 1152.51 | 9.557109 | 1152.51 | 9.557109 | 1152.51 |
| 1152.506 | 9.514206 | 1152.51 | 9.56     | 1152.51 | 9.56     | 1152.51 | 9.56     | 1152.51 |
| 1152.505 | 9.515288 | 1152.51 | 9.567109 | 1152.51 | 9.567109 | 1152.51 | 9.567109 | 1152.51 |
| 1152.504 | 9.51637  | 1152.51 | 9.57     | 1152.51 | 9.57     | 1152.51 | 9.57     | 1152.51 |
| 1152.503 | 9.517453 | 1152.51 | 9.577109 | 1152.51 | 9.577109 | 1152.51 | 9.577109 | 1152.51 |
| 1152.502 | 9.52     | 1152.51 | 9.58     | 1152.51 | 9.58     | 1152.51 | 9.58     | 1152.51 |
| 1152.501 | 9.52133  | 1152.51 | 9.587109 | 1152.51 | 9.587109 | 1152.51 | 9.587109 | 1152.51 |
| 1152.499 | 9.522558 | 1152.51 | 9.59     | 1152.51 | 9.59     | 1152.51 | 9.59     | 1152.51 |
| 1152.498 | 9.523991 | 1152.51 | 9.597109 | 1152.51 | 9.597109 | 1152.51 | 9.597109 | 1152.51 |
| 1152.497 | 9.525245 | 1152.51 | 9.598439 | 1152.51 | 9.6      | 1152.51 | 9.6      | 1152.51 |
| 1152.496 | 9.526659 | 1152.51 | 9.599654 | 1152.51 | 9.607109 | 1152.51 | 9.607109 | 1152.51 |
| 1152.494 | 9.528074 | 1152.51 | 9.600669 | 1152.51 | 9.61     | 1152.51 | 9.61     | 1152.51 |

|          |          |          |          |          |          |          |          |         |
|----------|----------|----------|----------|----------|----------|----------|----------|---------|
| 1152.492 | 9.529075 | 1152.51  | 9.601793 | 1152.51  | 9.617109 | 1152.51  | 9.617109 | 1152.51 |
| 1152.49  | 9.530128 | 1152.51  | 9.603708 | 1152.51  | 9.62     | 1152.51  | 9.62     | 1152.51 |
| 1152.488 | 9.53114  | 1152.511 | 9.604732 | 1152.51  | 9.627109 | 1152.51  | 9.627109 | 1152.51 |
| 1152.487 | 9.532164 | 1152.511 | 9.605755 | 1152.51  | 9.63     | 1152.51  | 9.63     | 1152.51 |
| 1152.484 | 9.533299 | 1152.51  | 9.606778 | 1152.51  | 9.637109 | 1152.51  | 9.637109 | 1152.51 |
| 1152.481 | 9.534426 | 1152.509 | 9.608415 | 1152.51  | 9.64     | 1152.51  | 9.64     | 1152.51 |
| 1152.479 | 9.535862 | 1152.509 | 9.61     | 1152.51  | 9.647109 | 1152.51  | 9.647109 | 1152.51 |
| 1152.478 | 9.537297 | 1152.51  | 9.611214 | 1152.51  | 9.65     | 1152.51  | 9.65     | 1152.51 |
| 1152.475 | 9.538732 | 1152.509 | 9.613124 | 1152.51  | 9.657109 | 1152.51  | 9.657109 | 1152.51 |
| 1152.472 | 9.54     | 1152.506 | 9.614206 | 1152.51  | 9.66     | 1152.51  | 9.66     | 1152.51 |
| 1152.47  | 9.541175 | 1152.505 | 9.615288 | 1152.51  | 9.667109 | 1152.51  | 9.667109 | 1152.51 |
| 1152.466 | 9.542366 | 1152.504 | 9.61637  | 1152.51  | 9.67     | 1152.51  | 9.67     | 1152.51 |
| 1152.464 | 9.543556 | 1152.503 | 9.617453 | 1152.51  | 9.677109 | 1152.51  | 9.677109 | 1152.51 |
| 1152.463 | 9.544747 | 1152.502 | 9.62     | 1152.51  | 9.68     | 1152.51  | 9.68     | 1152.51 |
| 1152.457 | 9.545788 | 1152.501 | 9.62133  | 1152.51  | 9.687109 | 1152.51  | 9.687109 | 1152.51 |
| 1152.45  | 9.54683  | 1152.499 | 9.622558 | 1152.51  | 9.69     | 1152.51  | 9.69     | 1152.51 |
| 1152.445 | 9.547872 | 1152.498 | 9.623991 | 1152.51  | 9.697109 | 1152.51  | 9.697109 | 1152.51 |
| 1152.434 | 9.548913 | 1152.497 | 9.625245 | 1152.51  | 9.698439 | 1152.51  | 9.7      | 1152.51 |
| 1152.429 | 9.55     | 1152.496 | 9.626659 | 1152.51  | 9.699654 | 1152.51  | 9.707109 | 1152.51 |
| 1152.419 | 9.551408 | 1152.494 | 9.628074 | 1152.51  | 9.700669 | 1152.51  | 9.71     | 1152.51 |
| 1152.413 | 9.552603 | 1152.492 | 9.629075 | 1152.51  | 9.701793 | 1152.51  | 9.717109 | 1152.51 |
| 1152.403 | 9.554245 | 1152.49  | 9.630128 | 1152.51  | 9.703708 | 1152.51  | 9.72     | 1152.51 |
| 1152.398 | 9.55529  | 1152.488 | 9.63114  | 1152.511 | 9.704732 | 1152.51  | 9.727109 | 1152.51 |
| 1152.387 | 9.556335 | 1152.487 | 9.632164 | 1152.511 | 9.705755 | 1152.51  | 9.73     | 1152.51 |
| 1152.382 | 9.558164 | 1152.484 | 9.633299 | 1152.51  | 9.706778 | 1152.51  | 9.737109 | 1152.51 |
| 1152.371 | 9.559993 | 1152.481 | 9.634426 | 1152.509 | 9.708415 | 1152.51  | 9.74     | 1152.51 |
| 1152.366 | 9.561224 | 1152.479 | 9.635862 | 1152.509 | 9.71     | 1152.51  | 9.747109 | 1152.51 |
| 1152.355 | 9.562379 | 1152.478 | 9.637297 | 1152.51  | 9.711214 | 1152.51  | 9.75     | 1152.51 |
| 1152.35  | 9.564251 | 1152.475 | 9.638732 | 1152.509 | 9.713124 | 1152.51  | 9.757109 | 1152.51 |
| 1152.339 | 9.565998 | 1152.472 | 9.64     | 1152.506 | 9.714206 | 1152.51  | 9.76     | 1152.51 |
| 1152.333 | 9.567527 | 1152.47  | 9.641175 | 1152.505 | 9.715288 | 1152.51  | 9.767109 | 1152.51 |
| 1152.322 | 9.57     | 1152.466 | 9.642366 | 1152.504 | 9.71637  | 1152.51  | 9.77     | 1152.51 |
| 1152.317 | 9.571018 | 1152.464 | 9.643556 | 1152.503 | 9.717453 | 1152.51  | 9.777109 | 1152.51 |
| 1152.306 | 9.572062 | 1152.463 | 9.644747 | 1152.502 | 9.72     | 1152.51  | 9.78     | 1152.51 |
| 1152.301 | 9.575435 | 1152.457 | 9.645788 | 1152.501 | 9.72133  | 1152.51  | 9.787109 | 1152.51 |
| 1152.29  | 9.58     | 1152.45  | 9.64683  | 1152.499 | 9.722558 | 1152.51  | 9.79     | 1152.51 |
| 1152.284 | 9.583314 | 1152.445 | 9.647872 | 1152.498 | 9.723991 | 1152.51  | 9.797109 | 1152.51 |
| 1152.273 | 9.59     | 1152.434 | 9.648913 | 1152.497 | 9.725245 | 1152.51  | 9.798439 | 1152.51 |
| 1152.268 | 9.593314 | 1152.429 | 9.65     | 1152.496 | 9.726659 | 1152.51  | 9.799654 | 1152.51 |
| 1152.257 | 9.6      | 1152.419 | 9.651408 | 1152.494 | 9.728074 | 1152.51  | 9.800669 | 1152.51 |
| 1152.252 | 9.603314 | 1152.413 | 9.652603 | 1152.492 | 9.729075 | 1152.51  | 9.801793 | 1152.51 |
| 1152.241 | 9.61     | 1152.403 | 9.654245 | 1152.49  | 9.730128 | 1152.51  | 9.803708 | 1152.51 |
| 1152.235 | 9.613314 | 1152.398 | 9.65529  | 1152.488 | 9.73114  | 1152.511 | 9.804732 | 1152.51 |
| 1152.224 | 9.62     | 1152.387 | 9.656335 | 1152.487 | 9.732164 | 1152.511 | 9.805755 | 1152.51 |
| 1152.219 | 9.623314 | 1152.382 | 9.658164 | 1152.484 | 9.733299 | 1152.51  | 9.806778 | 1152.51 |
| 1152.208 | 9.63     | 1152.371 | 9.659993 | 1152.481 | 9.734426 | 1152.509 | 9.808415 | 1152.51 |
| 1152.202 | 9.633314 | 1152.366 | 9.661224 | 1152.479 | 9.735862 | 1152.509 | 9.81     | 1152.51 |

|          |          |          |          |          |          |          |          |          |
|----------|----------|----------|----------|----------|----------|----------|----------|----------|
| 1152.191 | 9.64     | 1152.355 | 9.662379 | 1152.478 | 9.737297 | 1152.51  | 9.811214 | 1152.51  |
| 1152.186 | 9.643314 | 1152.35  | 9.664251 | 1152.475 | 9.738732 | 1152.509 | 9.813124 | 1152.51  |
| 1152.175 | 9.65     | 1152.339 | 9.665998 | 1152.472 | 9.74     | 1152.506 | 9.814206 | 1152.51  |
| 1152.169 | 9.653314 | 1152.333 | 9.667527 | 1152.47  | 9.741175 | 1152.505 | 9.815288 | 1152.51  |
| 1152.158 | 9.66     | 1152.322 | 9.67     | 1152.466 | 9.742366 | 1152.504 | 9.81637  | 1152.51  |
| 1152.153 | 9.663314 | 1152.317 | 9.671018 | 1152.464 | 9.743556 | 1152.503 | 9.817453 | 1152.51  |
| 1152.142 | 9.67     | 1152.306 | 9.672062 | 1152.463 | 9.744747 | 1152.502 | 9.82     | 1152.51  |
| 1152.136 | 9.673314 | 1152.301 | 9.675435 | 1152.457 | 9.745788 | 1152.501 | 9.82133  | 1152.51  |
| 1152.125 | 9.68     | 1152.29  | 9.68     | 1152.45  | 9.74683  | 1152.499 | 9.822558 | 1152.51  |
| 1152.12  | 9.683314 | 1152.284 | 9.683314 | 1152.445 | 9.747872 | 1152.498 | 9.823991 | 1152.51  |
| 1152.109 | 9.69     | 1152.273 | 9.69     | 1152.434 | 9.748913 | 1152.497 | 9.825245 | 1152.51  |
| 1152.103 | 9.693314 | 1152.268 | 9.693314 | 1152.429 | 9.75     | 1152.496 | 9.826659 | 1152.51  |
| 1152.092 | 9.7      | 1152.257 | 9.7      | 1152.419 | 9.751408 | 1152.494 | 9.828074 | 1152.51  |
| 1152.087 | 9.703314 | 1152.252 | 9.703314 | 1152.413 | 9.752603 | 1152.492 | 9.829075 | 1152.51  |
| 1152.076 | 9.71     | 1152.241 | 9.71     | 1152.403 | 9.754245 | 1152.49  | 9.830128 | 1152.51  |
| 1152.07  | 9.713314 | 1152.235 | 9.713314 | 1152.398 | 9.75529  | 1152.488 | 9.83114  | 1152.511 |
| 1152.059 | 9.72     | 1152.224 | 9.72     | 1152.387 | 9.756335 | 1152.487 | 9.832164 | 1152.511 |
| 1152.054 | 9.723314 | 1152.219 | 9.723314 | 1152.382 | 9.758164 | 1152.484 | 9.833299 | 1152.51  |
| 1152.043 | 9.73     | 1152.208 | 9.73     | 1152.371 | 9.759993 | 1152.481 | 9.834426 | 1152.509 |
| 1152.037 | 9.733314 | 1152.202 | 9.733314 | 1152.366 | 9.761224 | 1152.479 | 9.835862 | 1152.509 |
| 1152.026 | 9.74     | 1152.191 | 9.74     | 1152.355 | 9.762379 | 1152.478 | 9.837297 | 1152.51  |
| 1152.021 | 9.743314 | 1152.186 | 9.743314 | 1152.35  | 9.764251 | 1152.475 | 9.838732 | 1152.509 |
| 1152.01  | 9.75     | 1152.175 | 9.75     | 1152.339 | 9.765998 | 1152.472 | 9.84     | 1152.506 |
| 1152.004 | 9.753314 | 1152.169 | 9.753314 | 1152.333 | 9.767527 | 1152.47  | 9.841175 | 1152.505 |
| 1151.993 | 9.76     | 1152.158 | 9.76     | 1152.322 | 9.77     | 1152.466 | 9.842366 | 1152.504 |
| 1151.988 | 9.763314 | 1152.153 | 9.763314 | 1152.317 | 9.771018 | 1152.464 | 9.843556 | 1152.503 |
| 1151.977 | 9.77     | 1152.142 | 9.77     | 1152.306 | 9.772062 | 1152.463 | 9.844747 | 1152.502 |
| 1151.971 | 9.773314 | 1152.136 | 9.773314 | 1152.301 | 9.775435 | 1152.457 | 9.845788 | 1152.501 |
| 1151.96  | 9.78     | 1152.125 | 9.78     | 1152.29  | 9.78     | 1152.45  | 9.84683  | 1152.499 |
| 1151.955 | 9.783314 | 1152.12  | 9.783314 | 1152.284 | 9.783314 | 1152.445 | 9.847872 | 1152.498 |
| 1151.944 | 9.79     | 1152.109 | 9.79     | 1152.273 | 9.79     | 1152.434 | 9.848913 | 1152.497 |
| 1151.938 | 9.793314 | 1152.103 | 9.793314 | 1152.268 | 9.793314 | 1152.429 | 9.85     | 1152.496 |
| 1151.927 | 9.8      | 1152.092 | 9.8      | 1152.257 | 9.8      | 1152.419 | 9.851408 | 1152.494 |
| 1151.922 | 9.803314 | 1152.087 | 9.803314 | 1152.252 | 9.803314 | 1152.413 | 9.852603 | 1152.492 |
| 1151.911 | 9.81     | 1152.076 | 9.81     | 1152.241 | 9.81     | 1152.403 | 9.854245 | 1152.49  |
| 1151.905 | 9.813314 | 1152.07  | 9.813314 | 1152.235 | 9.813314 | 1152.398 | 9.85529  | 1152.488 |
| 1151.894 | 9.82     | 1152.059 | 9.82     | 1152.224 | 9.82     | 1152.387 | 9.856335 | 1152.487 |
| 1151.889 | 9.823314 | 1152.054 | 9.823314 | 1152.219 | 9.823314 | 1152.382 | 9.858164 | 1152.484 |
| 1151.878 | 9.83     | 1152.043 | 9.83     | 1152.208 | 9.83     | 1152.371 | 9.859993 | 1152.481 |
| 1151.872 | 9.833314 | 1152.037 | 9.833314 | 1152.202 | 9.833314 | 1152.366 | 9.861224 | 1152.479 |
| 1151.861 | 9.84     | 1152.026 | 9.84     | 1152.191 | 9.84     | 1152.355 | 9.862379 | 1152.478 |
| 1151.856 | 9.843314 | 1152.021 | 9.843314 | 1152.186 | 9.843314 | 1152.35  | 9.864251 | 1152.475 |
| 1151.845 | 9.85     | 1152.01  | 9.85     | 1152.175 | 9.85     | 1152.339 | 9.865998 | 1152.472 |
| 1151.839 | 9.853314 | 1152.004 | 9.853314 | 1152.169 | 9.853314 | 1152.333 | 9.867527 | 1152.47  |
| 1151.828 | 9.86     | 1151.993 | 9.86     | 1152.158 | 9.86     | 1152.322 | 9.87     | 1152.466 |
| 1151.823 | 9.863314 | 1151.988 | 9.863314 | 1152.153 | 9.863314 | 1152.317 | 9.871018 | 1152.464 |
| 1151.812 | 9.87     | 1151.977 | 9.87     | 1152.142 | 9.87     | 1152.306 | 9.872062 | 1152.463 |

|          |          |          |          |          |          |          |          |          |
|----------|----------|----------|----------|----------|----------|----------|----------|----------|
| 1151.806 | 9.873314 | 1151.971 | 9.873314 | 1152.136 | 9.873314 | 1152.301 | 9.875435 | 1152.457 |
| 1151.795 | 9.88     | 1151.96  | 9.88     | 1152.125 | 9.88     | 1152.29  | 9.88     | 1152.45  |
| 1151.79  | 9.883314 | 1151.955 | 9.883314 | 1152.12  | 9.883314 | 1152.284 | 9.883314 | 1152.445 |
| 1151.779 | 9.89     | 1151.944 | 9.89     | 1152.109 | 9.89     | 1152.273 | 9.89     | 1152.434 |
| 1151.773 | 9.893314 | 1151.938 | 9.893314 | 1152.103 | 9.893314 | 1152.268 | 9.893314 | 1152.429 |
| 1151.762 | 9.9      | 1151.927 | 9.9      | 1152.092 | 9.9      | 1152.257 | 9.9      | 1152.419 |
| 1151.757 | 9.903314 | 1151.922 | 9.903314 | 1152.087 | 9.903314 | 1152.252 | 9.903314 | 1152.413 |
| 1151.745 | 9.91     | 1151.911 | 9.91     | 1152.076 | 9.91     | 1152.241 | 9.91     | 1152.403 |
| 1151.74  | 9.913314 | 1151.905 | 9.913314 | 1152.07  | 9.913314 | 1152.235 | 9.913314 | 1152.398 |
| 1151.729 | 9.92     | 1151.894 | 9.92     | 1152.059 | 9.92     | 1152.224 | 9.92     | 1152.387 |
| 1151.724 | 9.923314 | 1151.889 | 9.923314 | 1152.054 | 9.923314 | 1152.219 | 9.923314 | 1152.382 |
| 1151.712 | 9.93     | 1151.878 | 9.93     | 1152.043 | 9.93     | 1152.208 | 9.93     | 1152.371 |
| 1151.707 | 9.933314 | 1151.872 | 9.933314 | 1152.037 | 9.933314 | 1152.202 | 9.933314 | 1152.366 |
| 1151.696 | 9.94     | 1151.861 | 9.94     | 1152.026 | 9.94     | 1152.191 | 9.94     | 1152.355 |
| 1151.69  | 9.943314 | 1151.856 | 9.943314 | 1152.021 | 9.943314 | 1152.186 | 9.943314 | 1152.35  |
| 1151.679 | 9.95     | 1151.845 | 9.95     | 1152.01  | 9.95     | 1152.175 | 9.95     | 1152.339 |
| 1151.674 | 9.953314 | 1151.839 | 9.953314 | 1152.004 | 9.953314 | 1152.169 | 9.953314 | 1152.333 |
| 1151.663 | 9.96     | 1151.828 | 9.96     | 1151.993 | 9.96     | 1152.158 | 9.96     | 1152.322 |
| 1151.657 | 9.963314 | 1151.823 | 9.963314 | 1151.988 | 9.963314 | 1152.153 | 9.963314 | 1152.317 |
| 1151.646 | 9.97     | 1151.812 | 9.97     | 1151.977 | 9.97     | 1152.142 | 9.97     | 1152.306 |
| 1151.641 | 9.973314 | 1151.806 | 9.973314 | 1151.971 | 9.973314 | 1152.136 | 9.973314 | 1152.301 |
| 1151.63  | 9.98     | 1151.795 | 9.98     | 1151.96  | 9.98     | 1152.125 | 9.98     | 1152.29  |
| 1151.624 | 9.983314 | 1151.79  | 9.983314 | 1151.955 | 9.983314 | 1152.12  | 9.983314 | 1152.284 |
| 1151.613 | 9.99     | 1151.779 | 9.99     | 1151.944 | 9.99     | 1152.109 | 9.99     | 1152.273 |
| 1151.608 | 9.993314 | 1151.773 | 9.993314 | 1151.938 | 9.993314 | 1152.103 | 9.993314 | 1152.268 |
| 1151.605 | 9.994985 | 1151.77  | 9.994985 | 1151.935 | 9.994985 | 1152.101 | 9.994985 | 1152.265 |
| 1151.603 | 9.996239 | 1151.768 | 9.996239 | 1151.933 | 9.996239 | 1152.098 | 9.996239 | 1152.263 |
| 1151.599 | 9.998433 | 1151.765 | 9.998433 | 1151.93  | 9.998433 | 1152.095 | 9.998433 | 1152.26  |
| 1151.597 | 9.99958  | 1151.763 | 9.99958  | 1151.928 | 9.99958  | 1152.093 | 9.99958  | 1152.258 |
| 1151.596 | 10.00072 | 1151.761 | 10.00072 | 1151.926 | 10.00072 | 1152.091 | 10.00072 | 1152.256 |
| 1151.594 | 10.00191 | 1151.759 | 10.00191 | 1151.924 | 10.00191 | 1152.089 | 10.00191 | 1152.254 |
| 1151.591 | 10.00355 | 1151.756 | 10.00355 | 1151.921 | 10.00355 | 1152.086 | 10.00355 | 1152.251 |
| 1151.587 | 10.00566 | 1151.753 | 10.00566 | 1151.918 | 10.00566 | 1152.083 | 10.00566 | 1152.248 |
| 1151.586 | 10.00683 | 1151.751 | 10.00683 | 1151.916 | 10.00683 | 1152.081 | 10.00683 | 1152.246 |
| 1151.584 | 10.008   | 1151.749 | 10.008   | 1151.914 | 10.008   | 1152.079 | 10.008   | 1152.244 |
| 1151.582 | 10.00917 | 1151.747 | 10.00917 | 1151.912 | 10.00917 | 1152.077 | 10.00917 | 1152.242 |
| 1151.58  | 10.01017 | 1151.745 | 10.01017 | 1151.91  | 10.01017 | 1152.075 | 10.01017 | 1152.24  |
| 1151.578 | 10.01157 | 1151.743 | 10.01157 | 1151.908 | 10.01157 | 1152.073 | 10.01157 | 1152.238 |
| 1151.575 | 10.01338 | 1151.74  | 10.01338 | 1151.905 | 10.01338 | 1152.07  | 10.01338 | 1152.235 |
| 1151.572 | 10.01509 | 1151.737 | 10.01509 | 1151.902 | 10.01509 | 1152.067 | 10.01509 | 1152.232 |
| 1151.567 | 10.01823 | 1151.732 | 10.01823 | 1151.897 | 10.01823 | 1152.062 | 10.01823 | 1152.227 |
| 1151.564 | 10.02    | 1151.729 | 10.02    | 1151.894 | 10.02    | 1152.059 | 10.02    | 1152.224 |
| 1151.562 | 10.02109 | 1151.727 | 10.02109 | 1151.892 | 10.02109 | 1152.057 | 10.02109 | 1152.222 |
| 1151.559 | 10.02262 | 1151.725 | 10.02262 | 1151.89  | 10.02262 | 1152.055 | 10.02262 | 1152.22  |
| 1151.557 | 10.02387 | 1151.723 | 10.02387 | 1151.888 | 10.02387 | 1152.053 | 10.02387 | 1152.218 |
| 1151.556 | 10.02499 | 1151.721 | 10.02499 | 1151.886 | 10.02499 | 1152.051 | 10.02499 | 1152.216 |
| 1151.554 | 10.02611 | 1151.719 | 10.02611 | 1151.884 | 10.02611 | 1152.049 | 10.02611 | 1152.214 |

|          |          |          |          |          |          |          |          |          |
|----------|----------|----------|----------|----------|----------|----------|----------|----------|
| 1151.552 | 10.02723 | 1151.717 | 10.02723 | 1151.882 | 10.02723 | 1152.047 | 10.02723 | 1152.212 |
| 1151.55  | 10.02836 | 1151.715 | 10.02836 | 1151.88  | 10.02836 | 1152.045 | 10.02836 | 1152.21  |
| 1151.548 | 10.02938 | 1151.713 | 10.02938 | 1151.879 | 10.02938 | 1152.044 | 10.02938 | 1152.209 |
| 1151.547 | 10.0304  | 1151.712 | 10.0304  | 1151.877 | 10.0304  | 1152.042 | 10.0304  | 1152.207 |
| 1151.545 | 10.03141 | 1151.71  | 10.03141 | 1151.875 | 10.03141 | 1152.04  | 10.03141 | 1152.205 |
| 1151.542 | 10.03251 | 1151.708 | 10.03251 | 1151.873 | 10.03251 | 1152.038 | 10.03251 | 1152.203 |
| 1151.539 | 10.03384 | 1151.704 | 10.03384 | 1151.869 | 10.03384 | 1152.035 | 10.03384 | 1152.199 |
| 1151.535 | 10.03529 | 1151.7   | 10.03529 | 1151.865 | 10.03529 | 1152.03  | 10.03529 | 1152.195 |
| 1151.531 | 10.03644 | 1151.696 | 10.03644 | 1151.861 | 10.03644 | 1152.026 | 10.03644 | 1152.191 |
| 1151.527 | 10.03759 | 1151.692 | 10.03759 | 1151.857 | 10.03759 | 1152.022 | 10.03759 | 1152.187 |
| 1151.522 | 10.03873 | 1151.687 | 10.03873 | 1151.852 | 10.03873 | 1152.017 | 10.03873 | 1152.182 |
| 1151.516 | 10.03988 | 1151.681 | 10.03988 | 1151.847 | 10.03988 | 1152.012 | 10.03988 | 1152.177 |
| 1151.51  | 10.04104 | 1151.675 | 10.04104 | 1151.84  | 10.04104 | 1152.006 | 10.04104 | 1152.171 |
| 1151.504 | 10.04219 | 1151.669 | 10.04219 | 1151.834 | 10.04219 | 1151.999 | 10.04219 | 1152.164 |
| 1151.498 | 10.04326 | 1151.663 | 10.04325 | 1151.828 | 10.04325 | 1151.994 | 10.04325 | 1152.159 |
| 1151.492 | 10.04436 | 1151.657 | 10.04436 | 1151.822 | 10.04436 | 1151.987 | 10.04436 | 1152.152 |
| 1151.483 | 10.04579 | 1151.648 | 10.04579 | 1151.814 | 10.04579 | 1151.979 | 10.04579 | 1152.144 |
| 1151.474 | 10.04729 | 1151.639 | 10.04729 | 1151.804 | 10.04729 | 1151.969 | 10.04729 | 1152.134 |
| 1151.467 | 10.04833 | 1151.632 | 10.04833 | 1151.797 | 10.04833 | 1151.962 | 10.04833 | 1152.127 |
| 1151.458 | 10.04963 | 1151.623 | 10.04963 | 1151.789 | 10.04963 | 1151.954 | 10.04963 | 1152.119 |
| 1151.45  | 10.05078 | 1151.615 | 10.05078 | 1151.781 | 10.05078 | 1151.946 | 10.05078 | 1152.111 |
| 1151.439 | 10.05233 | 1151.604 | 10.05233 | 1151.769 | 10.05233 | 1151.934 | 10.05233 | 1152.099 |
| 1151.43  | 10.05348 | 1151.596 | 10.05348 | 1151.761 | 10.05348 | 1151.926 | 10.05348 | 1152.091 |
| 1151.418 | 10.05505 | 1151.584 | 10.05505 | 1151.749 | 10.05505 | 1151.914 | 10.05505 | 1152.079 |
| 1151.406 | 10.05672 | 1151.571 | 10.05672 | 1151.736 | 10.05672 | 1151.902 | 10.05672 | 1152.067 |
| 1151.395 | 10.05814 | 1151.561 | 10.05814 | 1151.726 | 10.05814 | 1151.891 | 10.05814 | 1152.056 |
| 1151.384 | 10.05957 | 1151.55  | 10.05957 | 1151.715 | 10.05957 | 1151.88  | 10.05957 | 1152.045 |
| 1151.375 | 10.06084 | 1151.54  | 10.06084 | 1151.705 | 10.06084 | 1151.871 | 10.06084 | 1152.036 |
| 1151.366 | 10.06201 | 1151.531 | 10.06201 | 1151.697 | 10.06201 | 1151.862 | 10.06201 | 1152.027 |
| 1151.356 | 10.0633  | 1151.521 | 10.0633  | 1151.687 | 10.0633  | 1151.852 | 10.0633  | 1152.017 |
| 1151.345 | 10.06474 | 1151.51  | 10.06474 | 1151.675 | 10.06474 | 1151.84  | 10.06474 | 1152.005 |
| 1151.334 | 10.06609 | 1151.499 | 10.06609 | 1151.664 | 10.06609 | 1151.83  | 10.06609 | 1151.995 |
| 1151.324 | 10.0673  | 1151.489 | 10.0673  | 1151.655 | 10.0673  | 1151.82  | 10.0673  | 1151.985 |
| 1151.315 | 10.06838 | 1151.48  | 10.06838 | 1151.646 | 10.06838 | 1151.811 | 10.06838 | 1151.976 |
| 1151.306 | 10.06947 | 1151.471 | 10.06947 | 1151.636 | 10.06947 | 1151.802 | 10.06947 | 1151.967 |
| 1151.297 | 10.07057 | 1151.462 | 10.07057 | 1151.627 | 10.07057 | 1151.792 | 10.07057 | 1151.957 |
| 1151.287 | 10.0717  | 1151.452 | 10.0717  | 1151.618 | 10.0717  | 1151.783 | 10.0717  | 1151.948 |
| 1151.279 | 10.07295 | 1151.442 | 10.0727  | 1151.609 | 10.0727  | 1151.774 | 10.0727  | 1151.939 |
| 1151.268 | 10.07431 | 1151.43  | 10.07391 | 1151.599 | 10.07391 | 1151.764 | 10.07391 | 1151.929 |
| 1151.258 | 10.07551 | 1151.42  | 10.07511 | 1151.588 | 10.07511 | 1151.754 | 10.07511 | 1151.919 |
| 1151.249 | 10.07666 | 1151.41  | 10.07611 | 1151.58  | 10.07611 | 1151.745 | 10.07611 | 1151.91  |
| 1151.24  | 10.07774 | 1151.401 | 10.0772  | 1151.571 | 10.0772  | 1151.736 | 10.0772  | 1151.901 |
| 1151.231 | 10.07888 | 1151.391 | 10.07828 | 1151.561 | 10.07828 | 1151.726 | 10.07828 | 1151.891 |
| 1151.22  | 10.08    | 1151.381 | 10.07947 | 1151.551 | 10.07947 | 1151.716 | 10.07947 | 1151.881 |
| 1151.207 | 10.08153 | 1151.367 | 10.08097 | 1151.538 | 10.08097 | 1151.703 | 10.08097 | 1151.868 |
| 1151.197 | 10.08266 | 1151.358 | 10.0821  | 1151.528 | 10.0821  | 1151.693 | 10.0821  | 1151.858 |
| 1151.187 | 10.08456 | 1151.341 | 10.08323 | 1151.518 | 10.08323 | 1151.683 | 10.08323 | 1151.848 |

|          |          |          |          |          |          |          |          |          |
|----------|----------|----------|----------|----------|----------|----------|----------|----------|
| 1151.176 | 10.08589 | 1151.33  | 10.08456 | 1151.506 | 10.08456 | 1151.672 | 10.08456 | 1151.837 |
| 1151.164 | 10.08722 | 1151.318 | 10.08589 | 1151.495 | 10.08589 | 1151.66  | 10.08589 | 1151.825 |
| 1151.153 | 10.09    | 1151.294 | 10.08722 | 1151.483 | 10.08722 | 1151.649 | 10.08722 | 1151.814 |
| 1151.129 | 10.09172 | 1151.28  | 10.09    | 1151.46  | 10.09    | 1151.625 | 10.09    | 1151.79  |
| 1151.114 | 10.09318 | 1151.267 | 10.09172 | 1151.445 | 10.09172 | 1151.61  | 10.09172 | 1151.775 |
| 1151.102 | 10.09518 | 1151.25  | 10.09318 | 1151.432 | 10.09318 | 1151.598 | 10.09318 | 1151.763 |
| 1151.084 | 10.09645 | 1151.239 | 10.09518 | 1151.415 | 10.09518 | 1151.58  | 10.09518 | 1151.745 |
| 1151.073 | 10.09868 | 1151.219 | 10.09645 | 1151.404 | 10.09645 | 1151.569 | 10.09645 | 1151.734 |
| 1151.054 | 10.1     | 1151.208 | 10.09868 | 1151.384 | 10.09868 | 1151.55  | 10.09868 | 1151.715 |
| 1151.042 | 10.10115 | 1151.197 | 10.1     | 1151.373 | 10.1     | 1151.538 | 10.1     | 1151.703 |
| 1151.032 | 10.10261 | 1151.185 | 10.10115 | 1151.363 | 10.10115 | 1151.528 | 10.10115 | 1151.693 |
| 1151.019 | 10.10414 | 1151.171 | 10.10261 | 1151.35  | 10.10261 | 1151.515 | 10.10261 | 1151.68  |
| 1151.006 | 10.10624 | 1151.153 | 10.10414 | 1151.336 | 10.10414 | 1151.502 | 10.10414 | 1151.667 |
| 1150.987 | 10.10758 | 1151.141 | 10.10624 | 1151.318 | 10.10624 | 1151.483 | 10.10624 | 1151.648 |
| 1150.976 | 10.10892 | 1151.129 | 10.10758 | 1151.306 | 10.10758 | 1151.471 | 10.10758 | 1151.637 |
| 1150.964 | 10.11    | 1151.12  | 10.10892 | 1151.294 | 10.10892 | 1151.46  | 10.10892 | 1151.625 |
| 1150.954 | 10.11159 | 1151.106 | 10.11    | 1151.285 | 10.11    | 1151.45  | 10.11    | 1151.615 |
| 1150.94  | 10.11291 | 1151.094 | 10.11159 | 1151.271 | 10.11159 | 1151.436 | 10.11159 | 1151.601 |
| 1150.929 | 10.11473 | 1151.078 | 10.11291 | 1151.26  | 10.11291 | 1151.425 | 10.11291 | 1151.59  |
| 1150.913 | 10.11588 | 1151.068 | 10.11473 | 1151.244 | 10.11473 | 1151.409 | 10.11473 | 1151.574 |
| 1150.903 | 10.11704 | 1151.058 | 10.11588 | 1151.234 | 10.11588 | 1151.399 | 10.11588 | 1151.564 |
| 1150.893 | 10.11907 | 1151.041 | 10.11704 | 1151.224 | 10.11704 | 1151.389 | 10.11704 | 1151.554 |
| 1150.875 | 10.12029 | 1151.03  | 10.11907 | 1151.206 | 10.11907 | 1151.371 | 10.11907 | 1151.536 |
| 1150.865 | 10.12141 | 1151.02  | 10.12029 | 1151.195 | 10.12029 | 1151.361 | 10.12029 | 1151.526 |
| 1150.855 | 10.12277 | 1151.009 | 10.12141 | 1151.186 | 10.12141 | 1151.351 | 10.12141 | 1151.516 |
| 1150.843 | 10.12397 | 1150.998 | 10.12277 | 1151.174 | 10.12277 | 1151.339 | 10.12277 | 1151.504 |
| 1150.833 | 10.12502 | 1150.989 | 10.12397 | 1151.163 | 10.12397 | 1151.329 | 10.12397 | 1151.494 |
| 1150.824 | 10.12607 | 1150.98  | 10.12502 | 1151.154 | 10.12502 | 1151.32  | 10.12502 | 1151.485 |
| 1150.814 | 10.12712 | 1150.971 | 10.12607 | 1151.145 | 10.12607 | 1151.31  | 10.12607 | 1151.476 |
| 1150.805 | 10.12895 | 1150.955 | 10.12712 | 1151.136 | 10.12712 | 1151.301 | 10.12712 | 1151.466 |
| 1150.789 | 10.13    | 1150.945 | 10.12895 | 1151.12  | 10.12895 | 1151.285 | 10.12895 | 1151.45  |
| 1150.78  | 10.13124 | 1150.934 | 10.13    | 1151.111 | 10.13    | 1151.276 | 10.13    | 1151.441 |
| 1150.769 | 10.13242 | 1150.924 | 10.13124 | 1151.1   | 10.13124 | 1151.265 | 10.13124 | 1151.43  |
| 1150.759 | 10.13346 | 1150.915 | 10.13242 | 1151.089 | 10.13242 | 1151.255 | 10.13242 | 1151.42  |
| 1150.75  | 10.13527 | 1150.899 | 10.13346 | 1151.08  | 10.13346 | 1151.246 | 10.13346 | 1151.411 |
| 1150.734 | 10.13632 | 1150.89  | 10.13527 | 1151.064 | 10.13527 | 1151.23  | 10.13527 | 1151.395 |
| 1150.725 | 10.13732 | 1150.881 | 10.13632 | 1151.055 | 10.13632 | 1151.221 | 10.13632 | 1151.386 |
| 1150.716 | 10.13928 | 1150.864 | 10.13732 | 1151.047 | 10.13732 | 1151.212 | 10.13732 | 1151.377 |
| 1150.699 | 10.14167 | 1150.843 | 10.13928 | 1151.029 | 10.13928 | 1151.195 | 10.13928 | 1151.36  |
| 1150.678 | 10.14304 | 1150.831 | 10.14167 | 1151.009 | 10.14167 | 1151.174 | 10.14166 | 1151.339 |
| 1150.666 | 10.14441 | 1150.819 | 10.14304 | 1150.997 | 10.14304 | 1151.162 | 10.14303 | 1151.327 |
| 1150.654 | 10.14578 | 1150.807 | 10.14441 | 1150.985 | 10.14441 | 1151.15  | 10.1444  | 1151.315 |
| 1150.642 | 10.15    | 1150.771 | 10.14578 | 1150.973 | 10.14578 | 1151.138 | 10.14577 | 1151.303 |
| 1150.605 | 10.15157 | 1150.757 | 10.15    | 1150.936 | 10.15    | 1151.101 | 10.15    | 1151.267 |
| 1150.592 | 10.15305 | 1150.744 | 10.15157 | 1150.922 | 10.15157 | 1151.088 | 10.15156 | 1151.253 |
| 1150.579 | 10.15454 | 1150.731 | 10.15305 | 1150.909 | 10.15305 | 1151.075 | 10.15304 | 1151.24  |
| 1150.566 | 10.15602 | 1150.718 | 10.15453 | 1150.896 | 10.15453 | 1151.062 | 10.15452 | 1151.227 |

|          |          |          |          |          |          |          |          |          |
|----------|----------|----------|----------|----------|----------|----------|----------|----------|
| 1150.553 | 10.16    | 1150.683 | 10.15602 | 1150.883 | 10.15601 | 1151.049 | 10.156   | 1151.214 |
| 1150.518 | 10.1617  | 1150.668 | 10.16    | 1150.849 | 10.16    | 1151.014 | 10.16    | 1151.179 |
| 1150.503 | 10.16331 | 1150.654 | 10.1617  | 1150.834 | 10.16169 | 1150.999 | 10.16169 | 1151.164 |
| 1150.489 | 10.16491 | 1150.64  | 10.1633  | 1150.82  | 10.1633  | 1150.985 | 10.16329 | 1151.15  |
| 1150.475 | 10.16652 | 1150.626 | 10.16491 | 1150.806 | 10.16491 | 1150.971 | 10.16489 | 1151.136 |
| 1150.461 | 10.17    | 1150.596 | 10.16652 | 1150.791 | 10.16651 | 1150.957 | 10.16649 | 1151.122 |
| 1150.43  | 10.17184 | 1150.58  | 10.17    | 1150.761 | 10.17    | 1150.926 | 10.17    | 1151.092 |
| 1150.414 | 10.17357 | 1150.564 | 10.17184 | 1150.745 | 10.17184 | 1150.91  | 10.17183 | 1151.076 |
| 1150.399 | 10.17531 | 1150.549 | 10.17357 | 1150.73  | 10.17357 | 1150.895 | 10.17356 | 1151.061 |
| 1150.384 | 10.17704 | 1150.534 | 10.17531 | 1150.715 | 10.1753  | 1150.88  | 10.17528 | 1151.046 |
| 1150.369 | 10.18    | 1150.508 | 10.17704 | 1150.7   | 10.17703 | 1150.865 | 10.17701 | 1151.03  |
| 1150.343 | 10.18198 | 1150.491 | 10.18    | 1150.674 | 10.18    | 1150.839 | 10.18    | 1151.004 |
| 1150.325 | 10.18384 | 1150.475 | 10.18198 | 1150.656 | 10.18198 | 1150.822 | 10.18197 | 1150.987 |
| 1150.309 | 10.18571 | 1150.458 | 10.18384 | 1150.64  | 10.18384 | 1150.805 | 10.18382 | 1150.971 |
| 1150.293 | 10.18757 | 1150.442 | 10.1857  | 1150.624 | 10.18569 | 1150.789 | 10.18567 | 1150.955 |
| 1150.276 | 10.19    | 1150.421 | 10.18756 | 1150.607 | 10.18755 | 1150.773 | 10.18752 | 1150.939 |
| 1150.255 | 10.19213 | 1150.402 | 10.19    | 1150.586 | 10.19    | 1150.752 | 10.19    | 1150.917 |
| 1150.237 | 10.19411 | 1150.385 | 10.19213 | 1150.568 | 10.19212 | 1150.733 | 10.19211 | 1150.898 |
| 1150.219 | 10.1961  | 1150.367 | 10.19411 | 1150.55  | 10.1941  | 1150.716 | 10.19409 | 1150.881 |
| 1150.202 | 10.19809 | 1150.35  | 10.1961  | 1150.533 | 10.19609 | 1150.698 | 10.19606 | 1150.864 |
| 1150.184 | 10.2     | 1150.333 | 10.19808 | 1150.515 | 10.19807 | 1150.681 | 10.19804 | 1150.847 |
| 1150.168 | 10.20227 | 1150.313 | 10.2     | 1150.499 | 10.2     | 1150.664 | 10.2     | 1150.829 |
| 1150.148 | 10.20439 | 1150.295 | 10.20227 | 1150.479 | 10.20227 | 1150.644 | 10.20226 | 1150.81  |
| 1150.129 | 10.2065  | 1150.276 | 10.20438 | 1150.46  | 10.20437 | 1150.626 | 10.20436 | 1150.791 |
| 1150.111 | 10.20861 | 1150.258 | 10.20649 | 1150.442 | 10.20648 | 1150.607 | 10.20645 | 1150.773 |
| 1150.092 | 10.21    | 1150.246 | 10.20861 | 1150.423 | 10.20859 | 1150.589 | 10.20855 | 1150.755 |
| 1150.08  | 10.21242 | 1150.224 | 10.21    | 1150.411 | 10.21    | 1150.576 | 10.21    | 1150.742 |
| 1150.059 | 10.21466 | 1150.205 | 10.21241 | 1150.39  | 10.21241 | 1150.555 | 10.2124  | 1150.721 |
| 1150.039 | 10.2169  | 1150.185 | 10.21465 | 1150.37  | 10.21464 | 1150.536 | 10.21462 | 1150.701 |
| 1150.019 | 10.21914 | 1150.165 | 10.21689 | 1150.351 | 10.21688 | 1150.516 | 10.21684 | 1150.682 |
| 1150     | 10.22032 | 1150.155 | 10.21913 | 1150.331 | 10.21911 | 1150.497 | 10.21907 | 1150.662 |
| 1149.989 | 10.22256 | 1150.135 | 10.22032 | 1150.321 | 10.22032 | 1150.486 | 10.22032 | 1150.652 |
| 1149.97  | 10.22493 | 1150.115 | 10.22256 | 1150.301 | 10.22255 | 1150.467 | 10.22254 | 1150.632 |
| 1149.949 | 10.2273  | 1150.094 | 10.22492 | 1150.28  | 10.22491 | 1150.446 | 10.22489 | 1150.612 |
| 1149.928 | 10.22966 | 1150.073 | 10.22729 | 1150.26  | 10.22727 | 1150.425 | 10.22723 | 1150.591 |
| 1149.907 | 10.23271 | 1150.046 | 10.22965 | 1150.239 | 10.22963 | 1150.405 | 10.22958 | 1150.57  |
| 1149.881 | 10.2352  | 1150.025 | 10.2327  | 1150.212 | 10.2327  | 1150.378 | 10.23268 | 1150.543 |
| 1149.859 | 10.23769 | 1150.003 | 10.23519 | 1150.19  | 10.23518 | 1150.356 | 10.23515 | 1150.522 |
| 1149.838 | 10.24    | 1149.983 | 10.23768 | 1150.168 | 10.23766 | 1150.334 | 10.23762 | 1150.5   |
| 1149.817 | 10.24285 | 1149.958 | 10.24    | 1150.148 | 10.24    | 1150.314 | 10.24    | 1150.479 |
| 1149.803 | 10.24547 | 1149.935 | 10.24285 | 1150.123 | 10.24284 | 1150.289 | 10.24282 | 1150.454 |
| 1149.792 | 10.24809 | 1149.912 | 10.24546 | 1150.1   | 10.24545 | 1150.266 | 10.24542 | 1150.432 |
| 1149.779 | 10.25    | 1149.895 | 10.24808 | 1150.077 | 10.24806 | 1150.243 | 10.24801 | 1150.409 |
| 1149.752 | 10.25299 | 1149.868 | 10.25    | 1150.06  | 10.25    | 1150.226 | 10.25    | 1150.392 |
| 1149.729 | 10.25459 | 1149.854 | 10.25299 | 1150.034 | 10.25298 | 1150.2   | 10.25297 | 1150.366 |
| 1149.704 | 10.25577 | 1149.844 | 10.25573 | 1150.01  | 10.25572 | 1150.176 | 10.25568 | 1150.342 |
| 1149.676 | 10.25765 | 1149.824 | 10.25848 | 1149.986 | 10.25845 | 1150.152 | 10.2584  | 1150.318 |



|          |          |          |          |          |          |          |          |          |
|----------|----------|----------|----------|----------|----------|----------|----------|----------|
| 1149.635 | 10.25922 | 1149.804 | 10.26    | 1149.973 | 10.26    | 1150.138 | 10.26    | 1150.304 |
| 1149.603 | 10.26022 | 1149.791 | 10.26313 | 1149.945 | 10.26313 | 1150.111 | 10.26311 | 1150.277 |
| 1149.58  | 10.2618  | 1149.768 | 10.266   | 1149.92  | 10.26599 | 1150.086 | 10.26595 | 1150.252 |
| 1149.555 | 10.26337 | 1149.74  | 10.26887 | 1149.895 | 10.26885 | 1150.061 | 10.26879 | 1150.227 |
| 1149.53  | 10.26456 | 1149.718 | 10.27    | 1149.885 | 10.27    | 1150.051 | 10.27    | 1150.216 |
| 1149.438 | 10.26574 | 1149.693 | 10.27194 | 1149.867 | 10.27327 | 1150.022 | 10.27325 | 1150.188 |
| 1149.399 | 10.26693 | 1149.668 | 10.27314 | 1149.855 | 10.27625 | 1149.996 | 10.27621 | 1150.162 |
| 1149.355 | 10.27    | 1149.599 | 10.27434 | 1149.842 | 10.27924 | 1149.97  | 10.27918 | 1150.136 |
| 1149.291 | 10.27136 | 1149.566 | 10.27853 | 1149.782 | 10.28043 | 1149.959 | 10.28042 | 1150.125 |
| 1149.215 | 10.27254 | 1149.536 | 10.28    | 1149.756 | 10.28341 | 1149.933 | 10.28339 | 1150.099 |
| 1149.134 | 10.27445 | 1149.487 | 10.2811  | 1149.734 | 10.28479 | 1149.921 | 10.28648 | 1150.072 |
| 1149.086 | 10.27952 | 1149.34  | 10.28287 | 1149.695 | 10.28706 | 1149.9   | 10.28957 | 1150.045 |
| 1149.047 | 10.28059 | 1149.306 | 10.28442 | 1149.66  | 10.28859 | 1149.885 | 10.29353 | 1150.01  |
| 1149.003 | 10.28184 | 1149.264 | 10.28557 | 1149.632 | 10.29    | 1149.868 | 10.29674 | 1149.982 |
| 1148.923 | 10.28342 | 1149.209 | 10.28673 | 1149.604 | 10.29174 | 1149.847 | 10.29995 | 1149.954 |
| 1148.808 | 10.28481 | 1149.159 | 10.28788 | 1149.576 | 10.29327 | 1149.824 | 10.30098 | 1149.945 |
| 1148.732 | 10.2862  | 1149.107 | 10.2899  | 1149.524 | 10.29455 | 1149.802 | 10.3027  | 1149.929 |
| 1148.682 | 10.28863 | 1149.013 | 10.29128 | 1149.487 | 10.29583 | 1149.778 | 10.30425 | 1149.914 |
| 1148.627 | 10.29    | 1148.958 | 10.29238 | 1149.457 | 10.29712 | 1149.752 | 10.30579 | 1149.896 |
| 1148.578 | 10.29138 | 1148.9   | 10.29437 | 1149.398 | 10.3     | 1149.691 | 10.30734 | 1149.876 |
| 1148.488 | 10.29254 | 1148.851 | 10.2971  | 1149.311 | 10.30147 | 1149.657 | 10.31    | 1149.836 |
| 1148.358 | 10.29453 | 1148.764 | 10.29883 | 1149.252 | 10.30275 | 1149.626 | 10.31177 | 1149.805 |
| 1148.272 | 10.29726 | 1148.638 | 10.3     | 1149.21  | 10.30376 | 1149.601 | 10.31331 | 1149.774 |
| 1148.176 | 10.299   | 1148.555 | 10.30118 | 1149.167 | 10.30476 | 1149.576 | 10.31447 | 1149.749 |
| 1148.112 | 10.30025 | 1148.494 | 10.30223 | 1149.127 | 10.30576 | 1149.55  | 10.31562 | 1149.724 |
| 1148.053 | 10.30224 | 1148.392 | 10.3041  | 1149.054 | 10.30971 | 1149.439 | 10.31678 | 1149.697 |
| 1147.994 | 10.30413 | 1148.292 | 10.30669 | 1148.95  | 10.31102 | 1149.4   | 10.32    | 1149.62  |
| 1147.934 | 10.30673 | 1148.15  | 10.30833 | 1148.881 | 10.31261 | 1149.349 | 10.32132 | 1149.586 |
| 1147.827 | 10.30838 | 1148.057 | 10.30997 | 1148.81  | 10.31479 | 1149.275 | 10.32248 | 1149.556 |
| 1147.717 | 10.31    | 1147.964 | 10.31115 | 1148.757 | 10.31618 | 1149.225 | 10.32439 | 1149.503 |
| 1147.604 | 10.31119 | 1147.894 | 10.31217 | 1148.71  | 10.31861 | 1149.135 | 10.33    | 1149.327 |
| 1147.503 | 10.31225 | 1147.831 | 10.31401 | 1148.623 | 10.32    | 1149.081 | 10.33109 | 1149.29  |
| 1147.43  | 10.31331 | 1147.766 | 10.31653 | 1148.499 | 10.3214  | 1149.025 | 10.33272 | 1149.231 |
| 1147.364 | 10.31437 | 1147.7   | 10.31814 | 1148.417 | 10.32257 | 1148.977 | 10.33639 | 1149.091 |
| 1147.296 | 10.31622 | 1147.584 | 10.32    | 1148.32  | 10.32359 | 1148.934 | 10.33924 | 1148.975 |
| 1147.228 | 10.31808 | 1147.464 | 10.32116 | 1148.257 | 10.32461 | 1148.891 | 10.34041 | 1148.926 |
| 1147.107 | 10.31993 | 1147.341 | 10.3222  | 1148.2   | 10.32562 | 1148.846 | 10.34153 | 1148.877 |
| 1146.983 | 10.3213  | 1147.249 | 10.32324 | 1148.142 | 10.32741 | 1148.767 | 10.34349 | 1148.79  |
| 1146.903 | 10.32245 | 1147.169 | 10.32428 | 1148.084 | 10.32919 | 1148.685 | 10.34452 | 1148.743 |
| 1146.809 | 10.32348 | 1147.097 | 10.32609 | 1147.979 | 10.33025 | 1148.634 | 10.34555 | 1148.694 |
| 1146.724 | 10.32451 | 1147.024 | 10.32791 | 1147.872 | 10.33228 | 1148.535 | 10.34658 | 1148.645 |
| 1146.637 | 10.32555 | 1146.95  | 10.32972 | 1147.762 | 10.3342  | 1148.437 | 10.34839 | 1148.556 |
| 1146.549 | 10.32736 | 1146.818 | 10.33126 | 1147.667 | 10.33684 | 1148.297 | 10.35    | 1148.475 |
| 1146.394 | 10.32917 | 1146.684 | 10.33238 | 1147.595 | 10.33852 | 1148.205 | 10.35124 | 1148.411 |
| 1146.235 | 10.33026 | 1146.602 | 10.33339 | 1147.53  | 10.34    | 1148.123 | 10.35232 | 1148.353 |
| 1146.135 | 10.33133 | 1146.52  | 10.33439 | 1147.465 | 10.3412  | 1148.054 | 10.35428 | 1148.246 |
| 1146.018 | 10.33252 | 1146.427 | 10.3354  | 1147.398 | 10.34227 | 1147.992 | 10.35698 | 1148.095 |

|          |          |          |          |          |          |          |          |          |
|----------|----------|----------|----------|----------|----------|----------|----------|----------|
| 1145.913 | 10.33371 | 1146.333 | 10.33716 | 1147.279 | 10.34334 | 1147.929 | 10.35869 | 1147.996 |
| 1145.806 | 10.3349  | 1146.238 | 10.33892 | 1147.158 | 10.34442 | 1147.865 | 10.36    | 1147.919 |
| 1145.698 | 10.33699 | 1146.069 | 10.34    | 1147.083 | 10.34629 | 1147.75  | 10.36123 | 1147.845 |
| 1145.505 | 10.33907 | 1145.897 | 10.34129 | 1146.991 | 10.34816 | 1147.633 | 10.36233 | 1147.777 |
| 1145.309 | 10.3403  | 1145.794 | 10.34244 | 1146.908 | 10.35    | 1147.515 | 10.36343 | 1147.709 |
| 1145.21  | 10.34148 | 1145.693 | 10.34359 | 1146.823 | 10.3513  | 1147.429 | 10.36453 | 1147.639 |
| 1145.012 | 10.34279 | 1145.579 | 10.34475 | 1146.737 | 10.35246 | 1147.352 | 10.36645 | 1147.515 |
| 1144.896 | 10.34411 | 1145.463 | 10.34677 | 1146.585 | 10.3535  | 1147.281 | 10.36837 | 1147.388 |
| 1144.779 | 10.34542 | 1145.346 | 10.34878 | 1146.43  | 10.35454 | 1147.209 | 10.37    | 1147.278 |
| 1144.661 | 10.34772 | 1145.139 | 10.35    | 1146.335 | 10.35558 | 1147.137 | 10.37134 | 1147.186 |
| 1144.451 | 10.35    | 1144.93  | 10.35143 | 1146.221 | 10.3574  | 1147.008 | 10.37253 | 1147.102 |
| 1144.336 | 10.35161 | 1144.778 | 10.35269 | 1146.118 | 10.35922 | 1146.877 | 10.3736  | 1147.026 |
| 1144.177 | 10.35304 | 1144.642 | 10.35396 | 1146.013 | 10.36026 | 1146.8   | 10.37468 | 1146.948 |
| 1144.032 | 10.35433 | 1144.517 | 10.35523 | 1145.907 | 10.36133 | 1146.721 | 10.37575 | 1146.87  |
| 1143.885 | 10.35562 | 1144.391 | 10.35745 | 1145.72  | 10.36252 | 1146.63  | 10.37762 | 1146.731 |
| 1143.736 | 10.3569  | 1144.264 | 10.35967 | 1145.528 | 10.36372 | 1146.539 | 10.3795  | 1146.59  |
| 1143.473 | 10.35915 | 1144.039 | 10.36077 | 1145.431 | 10.36491 | 1146.446 | 10.38067 | 1146.5   |
| 1143.305 | 10.36032 | 1143.92  | 10.36293 | 1145.238 | 10.367   | 1146.282 | 10.38261 | 1146.348 |
| 1143.112 | 10.36166 | 1143.783 | 10.36417 | 1145.125 | 10.36909 | 1146.113 | 10.38384 | 1146.249 |
| 1142.938 | 10.36315 | 1143.627 | 10.3654  | 1145.011 | 10.3703  | 1146.014 | 10.38508 | 1146.149 |
| 1142.761 | 10.36464 | 1143.47  | 10.36664 | 1144.896 | 10.37148 | 1145.916 | 10.38723 | 1145.972 |
| 1142.582 | 10.36613 | 1143.311 | 10.36881 | 1144.691 | 10.37279 | 1145.805 | 10.38939 | 1145.791 |
| 1142.265 | 10.36874 | 1143.029 | 10.37    | 1144.577 | 10.3741  | 1145.693 | 10.39075 | 1145.675 |
| 1142.141 | 10.37    | 1142.89  | 10.3716  | 1144.422 | 10.37542 | 1145.579 | 10.39289 | 1145.489 |
| 1141.96  | 10.37185 | 1142.684 | 10.37303 | 1144.28  | 10.37772 | 1145.377 | 10.39425 | 1145.368 |
| 1141.756 | 10.37349 | 1142.498 | 10.37446 | 1144.137 | 10.38    | 1145.172 | 10.39561 | 1145.246 |
| 1141.569 | 10.37514 | 1142.309 | 10.37589 | 1143.992 | 10.38161 | 1145.024 | 10.39798 | 1145.029 |
| 1141.381 | 10.37678 | 1142.118 | 10.3784  | 1143.735 | 10.38303 | 1144.891 | 10.4     | 1144.842 |
| 1141.19  | 10.37966 | 1141.78  | 10.38    | 1143.569 | 10.38432 | 1144.77  | 10.40166 | 1144.684 |
| 1140.982 | 10.38099 | 1141.621 | 10.38178 | 1143.381 | 10.3856  | 1144.648 | 10.40314 | 1144.542 |
| 1140.761 | 10.38201 | 1141.499 | 10.38336 | 1143.21  | 10.38688 | 1144.524 | 10.40447 | 1144.412 |
| 1140.579 | 10.3838  | 1141.281 | 10.38494 | 1143.038 | 10.38913 | 1144.304 | 10.40579 | 1144.281 |
| 1140.395 | 10.3854  | 1141.083 | 10.38652 | 1142.863 | 10.39032 | 1144.186 | 10.40712 | 1144.149 |
| 1140.209 | 10.38701 | 1140.882 | 10.38929 | 1142.554 | 10.39165 | 1144.052 | 10.40944 | 1143.915 |
| 1139.693 | 10.38861 | 1140.68  | 10.3904  | 1142.429 | 10.39314 | 1143.901 | 10.41083 | 1143.772 |
| 1139.474 | 10.39    | 1140.503 | 10.39194 | 1142.253 | 10.39462 | 1143.748 | 10.41324 | 1143.52  |
| 1139.268 | 10.39183 | 1140.268 | 10.39365 | 1142.053 | 10.3961  | 1143.593 | 10.41478 | 1143.357 |
| 1139.06  | 10.39331 | 1140.076 | 10.3952  | 1141.871 | 10.3987  | 1143.319 | 10.41631 | 1143.192 |
| 1138.851 | 10.39479 | 1139.881 | 10.39674 | 1141.687 | 10.4     | 1143.179 | 10.419   | 1142.9   |
| 1138.317 | 10.39627 | 1139.685 | 10.39829 | 1141.501 | 10.40184 | 1142.979 | 10.42    | 1142.79  |
| 1138.07  | 10.4     | 1139.183 | 10.4     | 1141.293 | 10.40348 | 1142.798 | 10.4219  | 1142.577 |
| 1137.837 | 10.40169 | 1138.952 | 10.40177 | 1141.077 | 10.40511 | 1142.614 | 10.42359 | 1142.384 |
| 1137.601 | 10.40326 | 1138.735 | 10.40319 | 1140.899 | 10.40675 | 1142.428 | 10.42529 | 1142.19  |
| 1137.363 | 10.40482 | 1138.515 | 10.40462 | 1140.72  | 10.40962 | 1142.099 | 10.42698 | 1141.993 |
| 1136.854 | 10.40639 | 1138.294 | 10.40605 | 1140.538 | 10.41099 | 1141.939 | 10.42994 | 1141.643 |
| 1136.576 | 10.41    | 1137.777 | 10.41    | 1140.029 | 10.412   | 1141.819 | 10.43102 | 1141.513 |
| 1136.312 | 10.41179 | 1137.517 | 10.41163 | 1139.815 | 10.41378 | 1141.607 | 10.43207 | 1141.387 |

|          |          |          |          |          |          |          |          |          |
|----------|----------|----------|----------|----------|----------|----------|----------|----------|
| 1136.046 | 10.41346 | 1137.271 | 10.41314 | 1139.614 | 10.41537 | 1141.414 | 10.4339  | 1141.163 |
| 1135.777 | 10.41512 | 1137.023 | 10.41465 | 1139.411 | 10.41697 | 1141.219 | 10.43555 | 1140.959 |
| 1135.306 | 10.41679 | 1136.772 | 10.41617 | 1139.206 | 10.41857 | 1141.022 | 10.4372  | 1140.752 |
| 1134.992 | 10.42    | 1136.285 | 10.42    | 1138.679 | 10.42    | 1140.844 | 10.43884 | 1140.544 |
| 1134.696 | 10.42191 | 1135.992 | 10.42173 | 1138.438 | 10.42182 | 1140.615 | 10.44    | 1140.396 |
| 1134.398 | 10.42368 | 1135.715 | 10.42334 | 1138.209 | 10.4233  | 1140.427 | 10.44188 | 1140.155 |
| 1134.096 | 10.42545 | 1135.436 | 10.42495 | 1137.979 | 10.42477 | 1140.237 | 10.4434  | 1139.957 |
| 1133.671 | 10.42722 | 1135.153 | 10.42656 | 1137.746 | 10.42624 | 1140.046 | 10.44492 | 1139.757 |
| 1133.32  | 10.43    | 1134.707 | 10.43    | 1137.244 | 10.43    | 1139.55  | 10.44644 | 1139.555 |
| 1132.99  | 10.43203 | 1134.378 | 10.43184 | 1136.971 | 10.43168 | 1139.325 | 10.45    | 1139.075 |
| 1132.656 | 10.4339  | 1134.068 | 10.43356 | 1136.713 | 10.43324 | 1139.113 | 10.45173 | 1138.838 |
| 1132.32  | 10.43578 | 1133.756 | 10.43527 | 1136.452 | 10.4348  | 1138.899 | 10.45334 | 1138.616 |
| 1131.951 | 10.43766 | 1133.44  | 10.43699 | 1136.189 | 10.43636 | 1138.683 | 10.45494 | 1138.391 |
| 1131.56  | 10.44    | 1133.044 | 10.44    | 1135.723 | 10.44    | 1138.172 | 10.45655 | 1138.164 |
| 1131.193 | 10.44215 | 1132.677 | 10.44196 | 1135.416 | 10.44178 | 1137.919 | 10.46    | 1137.67  |
| 1130.822 | 10.44414 | 1132.332 | 10.44378 | 1135.126 | 10.44344 | 1137.679 | 10.46183 | 1137.404 |
| 1130.448 | 10.44613 | 1131.983 | 10.4456  | 1134.834 | 10.4451  | 1137.436 | 10.46354 | 1137.152 |
| 1130.145 | 10.44812 | 1131.631 | 10.44743 | 1134.538 | 10.44676 | 1137.192 | 10.46525 | 1136.898 |
| 1129.712 | 10.45    | 1131.295 | 10.45    | 1134.117 | 10.45    | 1136.709 | 10.46695 | 1136.642 |
| 1129.305 | 10.45227 | 1130.888 | 10.45208 | 1133.774 | 10.4519  | 1136.423 | 10.47    | 1136.18  |
| 1128.895 | 10.45438 | 1130.505 | 10.45401 | 1133.45  | 10.45366 | 1136.152 | 10.47195 | 1135.88  |
| 1128.481 | 10.45648 | 1130.118 | 10.45594 | 1133.123 | 10.45543 | 1135.879 | 10.47376 | 1135.598 |
| 1128.253 | 10.45858 | 1129.727 | 10.45787 | 1132.793 | 10.45719 | 1135.604 | 10.47558 | 1135.312 |
| 1127.775 | 10.46    | 1129.462 | 10.46    | 1132.427 | 10.46    | 1135.161 | 10.47739 | 1135.024 |
| 1127.327 | 10.4624  | 1129.01  | 10.46221 | 1132.044 | 10.46202 | 1134.84  | 10.48    | 1134.606 |
| 1126.874 | 10.46462 | 1128.587 | 10.46425 | 1131.684 | 10.46389 | 1134.537 | 10.48207 | 1134.27  |
| 1126.418 | 10.46683 | 1128.16  | 10.46629 | 1131.32  | 10.46576 | 1134.231 | 10.48399 | 1133.954 |
| 1126.21  | 10.46905 | 1127.728 | 10.46833 | 1130.953 | 10.46763 | 1133.922 | 10.48592 | 1133.635 |
| 1125.75  | 10.47032 | 1127.481 | 10.47    | 1130.652 | 10.47    | 1133.528 | 10.48784 | 1133.313 |
| 1125.258 | 10.47253 | 1127.046 | 10.47233 | 1130.227 | 10.47214 | 1133.17  | 10.49    | 1132.948 |
| 1124.761 | 10.47487 | 1126.58  | 10.47449 | 1129.828 | 10.47412 | 1132.832 | 10.4922  | 1132.574 |
| 1124.259 | 10.4772  | 1126.109 | 10.47665 | 1129.425 | 10.4761  | 1132.491 | 10.49423 | 1132.222 |
| 1123.636 | 10.47953 | 1125.634 | 10.4788  | 1129.019 | 10.47809 | 1132.146 | 10.49626 | 1131.867 |
| 1123.234 | 10.48267 | 1124.993 | 10.48    | 1128.792 | 10.48    | 1131.812 | 10.4983  | 1131.508 |
| 1122.861 | 10.48512 | 1124.482 | 10.48246 | 1128.322 | 10.48227 | 1131.413 | 10.5     | 1131.206 |
| 1122.329 | 10.48757 | 1123.966 | 10.48474 | 1127.882 | 10.48436 | 1131.038 | 10.50232 | 1130.791 |
| 1122.092 | 10.49    | 1123.451 | 10.48701 | 1127.438 | 10.48646 | 1130.659 | 10.50447 | 1130.401 |
| 1121.486 | 10.4928  | 1122.853 | 10.48928 | 1126.99  | 10.48855 | 1130.276 | 10.50662 | 1130.007 |
| 1121.165 | 10.49538 | 1122.294 | 10.49032 | 1126.783 | 10.49    | 1130.011 | 10.50877 | 1129.61  |
| 1120.844 | 10.49795 | 1121.73  | 10.4926  | 1126.33  | 10.49239 | 1129.569 | 10.51    | 1129.38  |
| 1120.525 | 10.5     | 1121.278 | 10.49499 | 1125.847 | 10.4946  | 1129.154 | 10.51245 | 1128.921 |
| 1119.999 | 10.50294 | 1120.626 | 10.49738 | 1125.359 | 10.49681 | 1128.735 | 10.51472 | 1128.491 |
| 1119.636 | 10.50518 | 1120.126 | 10.49977 | 1124.866 | 10.49903 | 1128.313 | 10.51698 | 1128.057 |
| 1119.32  | 10.50783 | 1119.539 | 10.50273 | 1124.252 | 10.50032 | 1128.065 | 10.51925 | 1127.618 |
| 1119.06  | 10.51    | 1119.059 | 10.50524 | 1123.722 | 10.50253 | 1127.638 | 10.52032 | 1127.408 |
| 1118.801 | 10.51302 | 1118.393 | 10.50776 | 1123.187 | 10.50485 | 1127.181 | 10.52259 | 1126.966 |
| 1118.542 | 10.51449 | 1118.07  | 10.51    | 1122.705 | 10.50718 | 1126.72  | 10.52497 | 1126.493 |

|          |          |          |          |          |          |          |          |          |
|----------|----------|----------|----------|----------|----------|----------|----------|----------|
| 1117.947 | 10.51597 | 1117.748 | 10.51287 | 1122.086 | 10.50951 | 1126.255 | 10.52735 | 1126.015 |
| 1117.654 | 10.51744 | 1117.427 | 10.51551 | 1121.507 | 10.51266 | 1125.621 | 10.52974 | 1125.532 |
| 1117.398 | 10.52    | 1116.871 | 10.51814 | 1120.923 | 10.51511 | 1125.119 | 10.53272 | 1124.924 |
| 1117.185 | 10.52168 | 1116.506 | 10.52    | 1120.509 | 10.51756 | 1124.613 | 10.53523 | 1124.405 |
| 1116.972 | 10.52316 | 1116.189 | 10.52301 | 1119.834 | 10.52    | 1124.103 | 10.53774 | 1123.881 |
| 1116.759 | 10.52441 | 1115.918 | 10.52578 | 1119.204 | 10.5228  | 1123.517 | 10.54    | 1123.403 |
| 1115.937 | 10.52567 | 1115.649 | 10.52854 | 1118.568 | 10.52537 | 1122.968 | 10.54286 | 1122.796 |
| 1115.697 | 10.52692 | 1115.38  | 10.53    | 1118.23  | 10.52794 | 1122.414 | 10.54549 | 1122.229 |
| 1115.487 | 10.53    | 1114.724 | 10.53259 | 1117.628 | 10.53    | 1121.968 | 10.54812 | 1121.657 |
| 1115.111 | 10.53144 | 1114.419 | 10.5341  | 1117.275 | 10.53294 | 1121.327 | 10.55    | 1121.246 |
| 1114.042 | 10.53269 | 1114.153 | 10.53692 | 1116.623 | 10.53564 | 1120.728 | 10.55301 | 1120.583 |
| 1113.844 | 10.53375 | 1113.929 | 10.53945 | 1116.039 | 10.53833 | 1120.124 | 10.55576 | 1119.966 |
| 1113.589 | 10.53481 | 1113.705 | 10.54289 | 1115.246 | 10.54    | 1119.749 | 10.55852 | 1119.341 |
| 1113.266 | 10.53587 | 1113.482 | 10.54435 | 1114.912 | 10.54308 | 1119.051 | 10.56    | 1119.005 |
| 1112.984 | 10.54    | 1112.618 | 10.54581 | 1114.579 | 10.54591 | 1118.4   | 10.56315 | 1118.285 |
| 1112.703 | 10.54121 | 1112.365 | 10.54727 | 1114.247 | 10.54874 | 1117.743 | 10.56604 | 1117.613 |
| 1112.213 | 10.54227 | 1112.145 | 10.55    | 1113.627 | 10.55    | 1117.447 | 10.56893 | 1116.935 |
| 1111.973 | 10.54418 | 1111.75  | 10.55167 | 1113.25  | 10.55323 | 1116.689 | 10.57    | 1116.683 |
| 1111.766 | 10.54971 | 1110.613 | 10.55312 | 1112.921 | 10.55619 | 1115.983 | 10.5733  | 1115.901 |
| 1111.537 | 10.55114 | 1110.321 | 10.55438 | 1112.64  | 10.55915 | 1115.269 | 10.57632 | 1115.173 |
| 1111.34  | 10.55283 | 1109.977 | 10.55563 | 1112.358 | 10.56042 | 1114.96  | 10.57935 | 1114.437 |
| 1111.144 | 10.55516 | 1109.505 | 10.55689 | 1112.078 | 10.56199 | 1114.581 | 10.58043 | 1114.172 |
| 1110.948 | 10.55664 | 1109.206 | 10.56    | 1111.383 | 10.56377 | 1114.146 | 10.58345 | 1113.431 |
| 1110.606 | 10.55923 | 1108.684 | 10.56143 | 1111.065 | 10.56565 | 1113.693 | 10.58661 | 1112.643 |
| 1110.266 | 10.56037 | 1108.456 | 10.56269 | 1110.787 | 10.56711 | 1113.339 | 10.58977 | 1111.847 |
| 1110.043 | 10.56147 | 1108.236 | 10.56375 | 1110.552 | 10.57    | 1112.644 | 10.59166 | 1111.369 |
| 1109.722 | 10.5627  | 1107.992 | 10.56482 | 1110.317 | 10.57168 | 1112.242 | 10.59305 | 1111.018 |
| 1109.357 | 10.56375 | 1107.782 | 10.56589 | 1110.082 | 10.57308 | 1111.906 | 10.59492 | 1110.547 |
| 1108.856 | 10.56481 | 1107.573 | 10.57    | 1109.181 | 10.57449 | 1111.57  | 10.59613 | 1110.242 |
| 1108.54  | 10.56586 | 1107.364 | 10.57122 | 1108.915 | 10.5759  | 1111.235 | 10.59791 | 1109.795 |
| 1108.316 | 10.56771 | 1107     | 10.57228 | 1108.683 | 10.58    | 1110.263 | 10.59969 | 1109.35  |
| 1108.089 | 10.56956 | 1106.637 | 10.5742  | 1108.267 | 10.58161 | 1109.883 | 10.60203 | 1108.765 |
| 1107.887 | 10.57063 | 1106.426 | 10.57981 | 1107.06  | 10.58302 | 1109.552 | 10.60346 | 1108.41  |
| 1107.685 | 10.57238 | 1106.084 | 10.58115 | 1106.772 | 10.58428 | 1109.256 | 10.60488 | 1108.057 |
| 1107.484 | 10.57338 | 1105.889 | 10.58287 | 1106.406 | 10.58554 | 1108.961 | 10.60631 | 1107.704 |
| 1107.133 | 10.57439 | 1105.694 | 10.58523 | 1105.905 | 10.5868  | 1108.667 | 10.61    | 1106.792 |
| 1106.783 | 10.57539 | 1105.499 | 10.58673 | 1105.587 | 10.59    | 1107.922 | 10.61163 | 1106.392 |
| 1106.517 | 10.57715 | 1105.16  | 10.58936 | 1105.033 | 10.59144 | 1107.587 | 10.61305 | 1106.043 |
| 1106.274 | 10.5789  | 1104.821 | 10.59038 | 1104.819 | 10.5927  | 1107.296 | 10.61433 | 1105.732 |
| 1106.06  | 10.58    | 1104.61  | 10.59149 | 1104.585 | 10.59378 | 1107.048 | 10.6156  | 1105.421 |
| 1105.868 | 10.58127 | 1104.367 | 10.59273 | 1104.326 | 10.59485 | 1106.8   | 10.61687 | 1105.111 |
| 1105.676 | 10.5824  | 1104.151 | 10.5938  | 1104.103 | 10.59593 | 1106.553 | 10.62    | 1104.352 |
| 1105.484 | 10.58353 | 1103.935 | 10.59487 | 1103.88  | 10.6     | 1105.621 | 10.62146 | 1104     |
| 1105.15  | 10.58467 | 1103.72  | 10.59594 | 1103.658 | 10.60123 | 1105.341 | 10.62273 | 1103.693 |
| 1104.818 | 10.58665 | 1103.344 | 10.59781 | 1103.271 | 10.6023  | 1105.096 | 10.62382 | 1103.431 |
| 1104.642 | 10.58863 | 1102.97  | 10.59968 | 1102.884 | 10.60424 | 1104.658 | 10.62491 | 1103.17  |
| 1104.301 | 10.59    | 1102.713 | 10.60128 | 1102.555 | 10.60991 | 1103.38  | 10.626   | 1102.909 |

|          |          |          |          |          |          |          |          |          |
|----------|----------|----------|----------|----------|----------|----------|----------|----------|
| 1104.085 | 10.59139 | 1102.453 | 10.60241 | 1102.324 | 10.61117 | 1103.099 | 10.63    | 1101.952 |
| 1103.87  | 10.59262 | 1102.224 | 10.60343 | 1102.116 | 10.61291 | 1102.712 | 10.63124 | 1101.656 |
| 1103.494 | 10.59372 | 1102.018 | 10.60445 | 1101.908 | 10.61529 | 1102.181 | 10.63233 | 1101.398 |
| 1103.12  | 10.59483 | 1101.812 | 10.60546 | 1101.701 | 10.61681 | 1101.844 | 10.63429 | 1100.934 |
| 1102.918 | 10.59594 | 1101.608 | 10.60724 | 1101.34  | 10.61947 | 1101.257 | 10.64    | 1099.592 |
| 1102.553 | 10.59787 | 1101.25  | 10.60902 | 1100.979 | 10.62079 | 1100.967 | 10.64112 | 1099.33  |
| 1102.321 | 10.59981 | 1100.894 | 10.61025 | 1100.73  | 10.62277 | 1100.535 | 10.64282 | 1098.934 |
| 1102.091 | 10.60142 | 1100.599 | 10.61128 | 1100.523 | 10.62385 | 1100.298 | 10.64665 | 1098.045 |
| 1101.689 | 10.6027  | 1100.367 | 10.61243 | 1100.292 | 10.62493 | 1100.062 | 10.64963 | 1097.358 |
| 1101.378 | 10.60397 | 1100.135 | 10.61358 | 1100.062 | 10.62601 | 1099.827 | 10.65086 | 1097.076 |
| 1101.1   | 10.60524 | 1099.904 | 10.61473 | 1099.833 | 10.62791 | 1099.416 | 10.65236 | 1096.731 |
| 1100.856 | 10.60747 | 1099.501 | 10.61674 | 1099.433 | 10.6298  | 1099.006 | 10.65368 | 1096.43  |
| 1100.636 | 10.60971 | 1099.1   | 10.61875 | 1099.034 | 10.6313  | 1098.683 | 10.65477 | 1096.18  |
| 1100.418 | 10.61078 | 1098.908 | 10.62    | 1098.786 | 10.63244 | 1098.438 | 10.65587 | 1095.93  |
| 1100.2   | 10.61298 | 1098.516 | 10.62141 | 1098.509 | 10.63347 | 1098.217 | 10.65696 | 1095.681 |
| 1099.821 | 10.61438 | 1098.268 | 10.62265 | 1098.264 | 10.6345  | 1097.997 | 10.65888 | 1095.246 |
| 1099.617 | 10.61578 | 1098.021 | 10.62377 | 1098.044 | 10.63553 | 1097.777 | 10.66    | 1094.994 |
| 1099.229 | 10.61823 | 1097.589 | 10.62489 | 1097.825 | 10.63733 | 1097.393 | 10.66131 | 1094.698 |
| 1098.983 | 10.62    | 1097.278 | 10.62601 | 1097.606 | 10.63913 | 1097.011 | 10.66247 | 1094.438 |
| 1098.739 | 10.62171 | 1096.98  | 10.62797 | 1097.225 | 10.64026 | 1096.771 | 10.66351 | 1094.204 |
| 1098.511 | 10.62322 | 1096.718 | 10.62994 | 1096.845 | 10.6413  | 1096.551 | 10.66455 | 1093.971 |
| 1098.252 | 10.62458 | 1096.482 | 10.63144 | 1096.554 | 10.64246 | 1096.306 | 10.66559 | 1093.738 |
| 1097.911 | 10.62595 | 1096.247 | 10.63273 | 1096.306 | 10.64362 | 1096.062 | 10.66741 | 1093.332 |
| 1097.688 | 10.62731 | 1096.013 | 10.63402 | 1096.059 | 10.64478 | 1095.819 | 10.66923 | 1092.927 |
| 1097.489 | 10.62969 | 1095.606 | 10.63531 | 1095.813 | 10.64681 | 1095.394 | 10.67026 | 1092.698 |
| 1097.291 | 10.63085 | 1095.409 | 10.63756 | 1095.382 | 10.64884 | 1094.97  | 10.67131 | 1092.465 |
| 1097.093 | 10.63267 | 1095.1   | 10.63982 | 1094.954 | 10.65    | 1094.73  | 10.67248 | 1092.206 |
| 1096.638 | 10.63373 | 1094.92  | 10.64159 | 1094.62  | 10.65142 | 1094.435 | 10.67366 | 1091.948 |
| 1096.402 | 10.63491 | 1094.722 | 10.64301 | 1094.354 | 10.65268 | 1094.175 | 10.67483 | 1091.69  |
| 1096.116 | 10.63608 | 1094.524 | 10.64443 | 1094.088 | 10.65381 | 1093.942 | 10.67688 | 1091.24  |
| 1095.834 | 10.63726 | 1094.327 | 10.64584 | 1093.824 | 10.65494 | 1093.709 | 10.67893 | 1090.792 |
| 1095.45  | 10.64    | 1093.87  | 10.64832 | 1093.363 | 10.65608 | 1093.477 | 10.68    | 1090.559 |
| 1095.207 | 10.64134 | 1093.647 | 10.65    | 1093.051 | 10.65806 | 1093.072 | 10.68143 | 1090.247 |
| 1095.058 | 10.64252 | 1093.453 | 10.65173 | 1092.733 | 10.66    | 1092.675 | 10.6827  | 1089.972 |
| 1094.855 | 10.64357 | 1093.28  | 10.65326 | 1092.452 | 10.66145 | 1092.381 | 10.68384 | 1089.725 |
| 1094.623 | 10.64462 | 1093.107 | 10.65463 | 1092.2   | 10.66275 | 1092.117 | 10.68499 | 1089.479 |
| 1094.306 | 10.64567 | 1092.935 | 10.65601 | 1091.949 | 10.66406 | 1091.854 | 10.68613 | 1089.233 |
| 1094.105 | 10.64876 | 1092.432 | 10.65739 | 1091.699 | 10.66536 | 1091.592 | 10.68813 | 1088.803 |
| 1093.905 | 10.65    | 1092.23  | 10.6585  | 1091.497 | 10.66764 | 1091.135 | 10.69    | 1088.403 |
| 1093.685 | 10.65148 | 1091.992 | 10.66    | 1091.226 | 10.66992 | 1090.68  | 10.69146 | 1088.09  |
| 1093.441 | 10.65329 | 1091.701 | 10.66166 | 1090.926 | 10.67161 | 1090.343 | 10.69278 | 1087.812 |
| 1093.239 | 10.65503 | 1091.423 | 10.66274 | 1090.734 | 10.67304 | 1090.06  | 10.69409 | 1087.533 |
| 1092.961 | 10.65742 | 1091.043 | 10.66381 | 1090.542 | 10.67432 | 1089.806 | 10.6954  | 1087.256 |
| 1092.785 | 10.65894 | 1090.801 | 10.66756 | 1089.874 | 10.67561 | 1089.553 | 10.6977  | 1086.772 |
| 1092.61  | 10.66    | 1090.635 | 10.67    | 1089.441 | 10.67689 | 1089.301 | 10.69999 | 1086.289 |
| 1092.306 | 10.66182 | 1090.348 | 10.67174 | 1089.136 | 10.67914 | 1088.86  | 10.70162 | 1085.949 |
| 1092.12  | 10.66335 | 1090.11  | 10.67326 | 1088.868 | 10.68032 | 1088.63  | 10.70306 | 1085.65  |

|          |          |          |          |          |          |          |          |          |
|----------|----------|----------|----------|----------|----------|----------|----------|----------|
| 1091.918 | 10.66544 | 1089.785 | 10.6746  | 1088.635 | 10.68166 | 1088.37  | 10.70435 | 1085.381 |
| 1091.709 | 10.66678 | 1089.578 | 10.67694 | 1088.228 | 10.68314 | 1088.082 | 10.70565 | 1085.112 |
| 1091.423 | 10.66811 | 1089.373 | 10.67905 | 1087.864 | 10.68513 | 1087.699 | 10.70694 | 1084.845 |
| 1091.242 | 10.67    | 1089.083 | 10.6803  | 1087.648 | 10.68625 | 1087.483 | 10.70921 | 1084.378 |
| 1091.062 | 10.6717  | 1088.824 | 10.68218 | 1087.325 | 10.68734 | 1087.274 | 10.71137 | 1083.935 |
| 1090.919 | 10.67312 | 1088.607 | 10.68388 | 1087.036 | 10.68925 | 1086.909 | 10.71255 | 1083.694 |
| 1090.686 | 10.67509 | 1088.31  | 10.68621 | 1086.64  | 10.69027 | 1086.713 | 10.71372 | 1083.454 |
| 1090.49  | 10.67634 | 1088.122 | 10.68769 | 1086.389 | 10.69139 | 1086.5   | 10.71695 | 1082.799 |
| 1090.223 | 10.67852 | 1087.795 | 10.68918 | 1086.139 | 10.69264 | 1086.263 | 10.72    | 1082.183 |
| 1090.054 | 10.68    | 1087.575 | 10.69021 | 1085.966 | 10.69376 | 1086.051 | 10.72168 | 1081.845 |
| 1089.76  | 10.68118 | 1087.401 | 10.6918  | 1085.7   | 10.69488 | 1085.839 | 10.72382 | 1081.418 |
| 1089.605 | 10.68269 | 1087.178 | 10.69331 | 1085.448 | 10.696   | 1085.628 | 10.72489 | 1081.204 |
| 1089.443 | 10.68428 | 1086.943 | 10.69539 | 1085.105 | 10.69797 | 1085.259 | 10.72597 | 1080.99  |
| 1089.234 | 10.68648 | 1086.623 | 10.69671 | 1084.886 | 10.69993 | 1084.892 | 10.72705 | 1080.777 |
| 1089.008 | 10.68788 | 1086.419 | 10.69803 | 1084.669 | 10.70122 | 1084.651 | 10.72893 | 1080.404 |
| 1088.701 | 10.68928 | 1086.217 | 10.7     | 1084.347 | 10.70227 | 1084.456 | 10.73    | 1080.193 |
| 1088.506 | 10.69048 | 1086.044 | 10.70172 | 1084.067 | 10.70416 | 1084.107 | 10.73117 | 1079.962 |
| 1088.337 | 10.69183 | 1085.85  | 10.70317 | 1083.832 | 10.70675 | 1083.629 | 10.73218 | 1079.765 |
| 1088.202 | 10.69339 | 1085.628 | 10.70516 | 1083.51  | 10.7084  | 1083.326 | 10.73399 | 1079.41  |
| 1087.975 | 10.69552 | 1085.326 | 10.70643 | 1083.306 | 10.71    | 1083.034 | 10.73649 | 1078.925 |
| 1087.762 | 10.69687 | 1085.134 | 10.70865 | 1082.951 | 10.71105 | 1082.843 | 10.73807 | 1078.617 |
| 1087.576 | 10.69925 | 1084.801 | 10.71    | 1082.736 | 10.71277 | 1082.532 | 10.73966 | 1078.31  |
| 1087.391 | 10.70034 | 1084.649 | 10.71121 | 1082.544 | 10.7144  | 1082.237 | 10.74103 | 1078.047 |
| 1087.117 | 10.70195 | 1084.425 | 10.71277 | 1082.298 | 10.71582 | 1081.981 | 10.74272 | 1077.721 |
| 1086.981 | 10.70305 | 1084.273 | 10.71445 | 1082.035 | 10.71725 | 1081.725 | 10.74433 | 1077.414 |
| 1086.86  | 10.70493 | 1084.015 | 10.71675 | 1081.675 | 10.71867 | 1081.47  | 10.74573 | 1077.146 |
| 1086.739 | 10.70751 | 1083.663 | 10.71821 | 1081.448 | 10.72    | 1081.233 | 10.74714 | 1076.879 |
| 1086.618 | 10.70915 | 1083.44  | 10.71967 | 1081.221 | 10.72179 | 1080.915 | 10.74855 | 1076.613 |
| 1086.408 | 10.71023 | 1083.294 | 10.72102 | 1081.013 | 10.7233  | 1080.648 | 10.75    | 1076.338 |
| 1086.199 | 10.71218 | 1083.033 | 10.72274 | 1080.749 | 10.72537 | 1080.284 | 10.7518  | 1075.999 |
| 1085.944 | 10.71402 | 1082.788 | 10.72437 | 1080.501 | 10.72668 | 1080.053 | 10.75333 | 1075.714 |
| 1085.797 | 10.71656 | 1082.452 | 10.72579 | 1080.284 | 10.728   | 1079.822 | 10.75542 | 1075.323 |
| 1085.666 | 10.71818 | 1082.24  | 10.72722 | 1080.068 | 10.73    | 1079.474 | 10.75675 | 1075.076 |
| 1085.535 | 10.72    | 1082.002 | 10.72971 | 1079.693 | 10.73175 | 1079.171 | 10.75908 | 1074.645 |
| 1085.405 | 10.7212  | 1081.846 | 10.73073 | 1079.54  | 10.73324 | 1078.915 | 10.76033 | 1074.413 |
| 1085.179 | 10.72229 | 1081.706 | 10.73205 | 1079.343 | 10.73528 | 1078.564 | 10.76184 | 1074.136 |
| 1084.955 | 10.72337 | 1081.567 | 10.73321 | 1079.172 | 10.73658 | 1078.342 | 10.76287 | 1073.948 |
| 1084.82  | 10.72445 | 1081.428 | 10.73519 | 1078.879 | 10.73885 | 1077.955 | 10.76458 | 1073.635 |
| 1084.663 | 10.72635 | 1081.186 | 10.73791 | 1078.479 | 10.74    | 1077.759 | 10.76694 | 1073.207 |
| 1084.525 | 10.72824 | 1080.946 | 10.73964 | 1078.227 | 10.74125 | 1077.548 | 10.76844 | 1072.936 |
| 1084.387 | 10.73    | 1080.725 | 10.74122 | 1077.998 | 10.74288 | 1077.274 | 10.76994 | 1072.666 |
| 1084.25  | 10.73136 | 1080.555 | 10.7423  | 1077.843 | 10.74463 | 1076.98  | 10.77104 | 1072.467 |
| 1084.012 | 10.73258 | 1080.404 | 10.74424 | 1077.564 | 10.74705 | 1076.578 | 10.77279 | 1072.154 |
| 1083.776 | 10.73379 | 1080.253 | 10.74691 | 1077.182 | 10.74858 | 1076.323 | 10.77445 | 1071.859 |
| 1083.664 | 10.73501 | 1080.104 | 10.74861 | 1076.941 | 10.75    | 1076.089 | 10.7759  | 1071.602 |
| 1083.436 | 10.73713 | 1079.844 | 10.75    | 1076.746 | 10.75107 | 1075.912 | 10.77735 | 1071.345 |
| 1083.307 | 10.73926 | 1079.585 | 10.75127 | 1076.568 | 10.75288 | 1075.616 | 10.77988 | 1070.898 |

|          |          |          |          |          |          |          |          |          |
|----------|----------|----------|----------|----------|----------|----------|----------|----------|
| 1083.178 | 10.7403  | 1079.459 | 10.7524  | 1076.409 | 10.75459 | 1075.337 | 10.78141 | 1070.63  |
| 1083.05  | 10.74151 | 1079.315 | 10.75354 | 1076.251 | 10.75609 | 1075.094 | 10.78324 | 1070.311 |
| 1082.828 | 10.74285 | 1079.155 | 10.75468 | 1076.093 | 10.75758 | 1074.852 | 10.78523 | 1069.965 |
| 1082.72  | 10.74418 | 1078.996 | 10.75667 | 1075.818 | 10.76    | 1074.463 | 10.78797 | 1069.493 |
| 1082.558 | 10.74552 | 1078.838 | 10.75866 | 1075.545 | 10.76111 | 1074.285 | 10.78971 | 1069.194 |
| 1082.414 | 10.74787 | 1078.563 | 10.76    | 1075.363 | 10.76311 | 1073.967 | 10.79122 | 1068.936 |
| 1082.27  | 10.75    | 1078.315 | 10.76143 | 1075.169 | 10.76585 | 1073.532 | 10.7923  | 1068.752 |
| 1082.128 | 10.75165 | 1078.125 | 10.7627  | 1074.997 | 10.7676  | 1073.257 | 10.79425 | 1068.422 |
| 1081.881 | 10.75311 | 1077.958 | 10.76398 | 1074.826 | 10.77    | 1072.881 | 10.79693 | 1067.97  |
| 1081.745 | 10.75443 | 1077.809 | 10.76525 | 1074.656 | 10.77125 | 1072.686 | 10.79863 | 1067.684 |
| 1081.573 | 10.75574 | 1077.66  | 10.76748 | 1074.359 | 10.77237 | 1072.513 | 10.8     | 1067.456 |
| 1081.421 | 10.75706 | 1077.512 | 10.76971 | 1074.065 | 10.77349 | 1072.341 | 10.80127 | 1067.245 |
| 1081.271 | 10.75936 | 1077.255 | 10.77078 | 1073.926 | 10.7746  | 1072.169 | 10.8024  | 1067.057 |
| 1081.122 | 10.76083 | 1077.092 | 10.77298 | 1073.639 | 10.77656 | 1071.869 | 10.80354 | 1066.869 |
| 1080.864 | 10.76323 | 1076.829 | 10.77438 | 1073.458 | 10.77851 | 1071.571 | 10.80468 | 1066.681 |
| 1080.734 | 10.76476 | 1076.663 | 10.77578 | 1073.278 | 10.78    | 1071.345 | 10.80667 | 1066.355 |
| 1080.644 | 10.76629 | 1076.498 | 10.77823 | 1072.964 | 10.78138 | 1071.136 | 10.80866 | 1066.029 |
| 1080.489 | 10.76897 | 1076.211 | 10.78    | 1072.74  | 10.78262 | 1070.951 | 10.81    | 1065.812 |
| 1080.35  | 10.77    | 1076.102 | 10.78172 | 1072.523 | 10.78385 | 1070.767 | 10.81143 | 1065.581 |
| 1080.213 | 10.7719  | 1075.902 | 10.78325 | 1072.332 | 10.78508 | 1070.584 | 10.8127  | 1065.376 |
| 1080.077 | 10.7736  | 1075.726 | 10.78462 | 1072.161 | 10.78723 | 1070.264 | 10.81397 | 1065.172 |
| 1079.951 | 10.77529 | 1075.551 | 10.78599 | 1071.992 | 10.78939 | 1069.946 | 10.81524 | 1064.969 |
| 1079.798 | 10.77698 | 1075.378 | 10.78737 | 1071.823 | 10.79075 | 1069.746 | 10.81747 | 1064.615 |
| 1079.676 | 10.77995 | 1075.077 | 10.78977 | 1071.529 | 10.79286 | 1069.438 | 10.81969 | 1064.262 |
| 1079.555 | 10.78102 | 1074.969 | 10.79086 | 1071.396 | 10.79408 | 1069.262 | 10.82077 | 1064.092 |
| 1079.436 | 10.78207 | 1074.864 | 10.79337 | 1071.095 | 10.79529 | 1069.087 | 10.82297 | 1063.748 |
| 1079.132 | 10.78391 | 1074.682 | 10.79496 | 1070.905 | 10.7965  | 1068.913 | 10.82422 | 1063.552 |
| 1078.999 | 10.78557 | 1074.52  | 10.79655 | 1070.716 | 10.79862 | 1068.609 | 10.82548 | 1063.357 |
| 1078.878 | 10.78722 | 1074.36  | 10.79934 | 1070.388 | 10.8     | 1068.412 | 10.82674 | 1063.163 |
| 1078.759 | 10.78887 | 1074.2   | 10.8004  | 1070.264 | 10.80157 | 1068.19  | 10.82893 | 1062.824 |
| 1078.641 | 10.79    | 1074.092 | 10.80198 | 1070.081 | 10.80299 | 1067.991 | 10.83    | 1062.661 |
| 1078.366 | 10.79189 | 1073.912 | 10.80374 | 1069.879 | 10.8044  | 1067.793 | 10.83163 | 1062.412 |
| 1078.236 | 10.79341 | 1073.769 | 10.8055  | 1069.678 | 10.80581 | 1067.595 | 10.83309 | 1062.19  |
| 1078.116 | 10.79494 | 1073.627 | 10.80726 | 1069.479 | 10.80829 | 1067.252 | 10.83456 | 1061.969 |
| 1077.998 | 10.79646 | 1073.487 | 10.81    | 1069.171 | 10.81    | 1067.016 | 10.83602 | 1061.748 |
| 1077.882 | 10.8     | 1073.164 | 10.81201 | 1068.947 | 10.81176 | 1066.775 | 10.83858 | 1061.365 |
| 1077.656 | 10.80174 | 1073.007 | 10.81377 | 1068.753 | 10.81333 | 1066.561 | 10.84    | 1061.154 |
| 1077.527 | 10.80335 | 1072.864 | 10.81535 | 1068.58  | 10.8149  | 1066.349 | 10.84182 | 1060.884 |
| 1077.41  | 10.80496 | 1072.723 | 10.81694 | 1068.409 | 10.81647 | 1066.138 | 10.84345 | 1060.646 |
| 1077.295 | 10.80657 | 1072.583 | 10.81852 | 1068.239 | 10.81922 | 1065.772 | 10.84507 | 1060.408 |
| 1077.182 | 10.81    | 1072.288 | 10.82    | 1068.08  | 10.82039 | 1065.615 | 10.8467  | 1060.172 |
| 1077.001 | 10.81184 | 1072.132 | 10.82181 | 1067.888 | 10.82193 | 1065.413 | 10.84954 | 1059.762 |
| 1076.876 | 10.81355 | 1071.99  | 10.82338 | 1067.723 | 10.82364 | 1065.189 | 10.85098 | 1059.554 |
| 1076.763 | 10.81526 | 1071.849 | 10.82494 | 1067.56  | 10.82517 | 1064.989 | 10.85199 | 1059.41  |
| 1076.652 | 10.81697 | 1071.71  | 10.82651 | 1067.398 | 10.82671 | 1064.79  | 10.85376 | 1059.159 |
| 1076.543 | 10.82    | 1071.466 | 10.83    | 1067.041 | 10.82825 | 1064.592 | 10.85535 | 1058.934 |
| 1076.403 | 10.82195 | 1071.312 | 10.83179 | 1066.859 | 10.83    | 1064.368 | 10.85693 | 1058.711 |

|          |          |          |          |          |          |          |          |          |
|----------|----------|----------|----------|----------|----------|----------|----------|----------|
| 1076.283 | 10.82377 | 1071.171 | 10.83345 | 1066.694 | 10.83176 | 1064.143 | 10.85852 | 1058.489 |
| 1076.175 | 10.82558 | 1071.032 | 10.83511 | 1066.529 | 10.83318 | 1063.964 | 10.86    | 1058.283 |
| 1076.07  | 10.82739 | 1070.895 | 10.83677 | 1066.366 | 10.8346  | 1063.785 | 10.86182 | 1058.031 |
| 1075.967 | 10.83    | 1070.7   | 10.84    | 1066.053 | 10.83603 | 1063.607 | 10.86328 | 1057.83  |
| 1075.864 | 10.83207 | 1070.547 | 10.8419  | 1065.871 | 10.84    | 1063.115 | 10.86475 | 1057.629 |
| 1075.75  | 10.83399 | 1070.409 | 10.84366 | 1065.705 | 10.84163 | 1062.916 | 10.86622 | 1057.429 |
| 1075.649 | 10.83591 | 1070.273 | 10.84543 | 1065.54  | 10.84314 | 1062.733 | 10.87    | 1056.918 |
| 1075.551 | 10.83783 | 1070.139 | 10.84719 | 1065.377 | 10.84464 | 1062.551 | 10.87168 | 1056.694 |
| 1075.455 | 10.84    | 1069.989 | 10.85    | 1065.119 | 10.84615 | 1062.37  | 10.87323 | 1056.488 |
| 1075.385 | 10.84219 | 1069.84  | 10.85202 | 1064.936 | 10.85    | 1061.913 | 10.87478 | 1056.283 |
| 1075.279 | 10.84422 | 1069.706 | 10.85388 | 1064.77  | 10.85172 | 1061.71  | 10.87633 | 1056.079 |
| 1075.186 | 10.84624 | 1069.575 | 10.85575 | 1064.606 | 10.85333 | 1061.523 | 10.88    | 1055.602 |
| 1075.096 | 10.84827 | 1069.446 | 10.85762 | 1064.443 | 10.85494 | 1061.337 | 10.88177 | 1055.373 |
| 1075.009 | 10.85    | 1069.336 | 10.86    | 1064.239 | 10.85655 | 1061.153 | 10.88343 | 1055.162 |
| 1074.967 | 10.85232 | 1069.192 | 10.86214 | 1064.057 | 10.86    | 1060.76  | 10.88508 | 1054.952 |
| 1074.871 | 10.85445 | 1069.064 | 10.86411 | 1063.892 | 10.86184 | 1060.553 | 10.88673 | 1054.744 |
| 1074.788 | 10.85658 | 1068.938 | 10.86608 | 1063.73  | 10.86355 | 1060.363 | 10.89    | 1054.335 |
| 1074.708 | 10.85872 | 1068.815 | 10.86806 | 1063.57  | 10.86526 | 1060.175 | 10.89189 | 1054.101 |
| 1074.632 | 10.86    | 1068.742 | 10.87    | 1063.413 | 10.86697 | 1059.988 | 10.89364 | 1053.886 |
| 1074.527 | 10.86244 | 1068.605 | 10.87226 | 1063.234 | 10.87    | 1059.659 | 10.8954  | 1053.672 |
| 1074.456 | 10.86468 | 1068.484 | 10.87434 | 1063.072 | 10.87195 | 1059.449 | 10.89716 | 1053.46  |
| 1074.389 | 10.86693 | 1068.365 | 10.87642 | 1062.913 | 10.87377 | 1059.257 | 10.9     | 1053.119 |
| 1074.325 | 10.86917 | 1068.25  | 10.87851 | 1062.756 | 10.87558 | 1059.067 | 10.90201 | 1052.88  |
| 1074.25  | 10.87032 | 1068.192 | 10.88    | 1062.645 | 10.8774  | 1058.878 | 10.90387 | 1052.662 |
| 1074.192 | 10.87257 | 1068.079 | 10.88238 | 1062.469 | 10.88    | 1058.61  | 10.90573 | 1052.445 |
| 1074.139 | 10.87492 | 1067.967 | 10.88457 | 1062.311 | 10.88207 | 1058.398 | 10.90759 | 1052.23  |
| 1074.095 | 10.87728 | 1067.857 | 10.88677 | 1062.157 | 10.88399 | 1058.206 | 10.91    | 1051.953 |
| 1074.041 | 10.87964 | 1067.752 | 10.88896 | 1062.005 | 10.88591 | 1058.015 | 10.91213 | 1051.711 |
| 1073.999 | 10.88269 | 1067.617 | 10.89    | 1061.933 | 10.88783 | 1057.826 | 10.9141  | 1051.491 |
| 1073.962 | 10.88516 | 1067.515 | 10.89251 | 1061.763 | 10.89    | 1057.614 | 10.91606 | 1051.272 |
| 1073.938 | 10.88764 | 1067.417 | 10.89481 | 1061.611 | 10.89219 | 1057.402 | 10.91803 | 1051.055 |
| 1073.902 | 10.89    | 1067.326 | 10.89712 | 1061.463 | 10.89422 | 1057.209 | 10.92    | 1050.84  |
| 1073.878 | 10.89282 | 1067.22  | 10.89942 | 1061.317 | 10.89625 | 1057.019 | 10.92225 | 1050.596 |
| 1073.859 | 10.89541 | 1067.13  | 10.90263 | 1061.118 | 10.89828 | 1056.831 | 10.92433 | 1050.374 |
| 1073.85  | 10.898   | 1067.044 | 10.90505 | 1060.973 | 10.9     | 1056.672 | 10.9264  | 1050.155 |
| 1073.835 | 10.9     | 1066.981 | 10.90747 | 1060.832 | 10.90232 | 1056.461 | 10.92848 | 1049.938 |
| 1073.831 | 10.90296 | 1066.889 | 10.90989 | 1060.695 | 10.90446 | 1056.27  | 10.93    | 1049.78  |
| 1073.833 | 10.90566 | 1066.814 | 10.91276 | 1060.534 | 10.90659 | 1056.081 | 10.93237 | 1049.535 |
| 1073.835 | 10.90836 | 1066.743 | 10.9153  | 1060.399 | 10.90873 | 1055.896 | 10.93456 | 1049.313 |
| 1073.843 | 10.91    | 1066.702 | 10.91783 | 1060.268 | 10.91    | 1055.786 | 10.93675 | 1049.094 |
| 1073.861 | 10.91309 | 1066.627 | 10.92    | 1060.158 | 10.91244 | 1055.576 | 10.93894 | 1048.878 |
| 1073.886 | 10.91591 | 1066.568 | 10.9229  | 1060.015 | 10.91469 | 1055.388 | 10.94    | 1048.774 |
| 1073.897 | 10.91873 | 1066.514 | 10.92555 | 1059.89  | 10.91694 | 1055.203 | 10.9425  | 1048.529 |
| 1073.928 | 10.92    | 1066.491 | 10.9282  | 1059.77  | 10.91919 | 1055.021 | 10.9448  | 1048.309 |
| 1073.971 | 10.92322 | 1066.436 | 10.93    | 1059.691 | 10.92032 | 1054.93  | 10.9471  | 1048.092 |
| 1074.022 | 10.92616 | 1066.395 | 10.93303 | 1059.56  | 10.92257 | 1054.75  | 10.94941 | 1047.878 |
| 1074.093 | 10.9291  | 1066.361 | 10.9358  | 1059.448 | 10.92493 | 1054.566 | 10.95263 | 1047.58  |



|          |          |          |          |          |          |          |          |          |
|----------|----------|----------|----------|----------|----------|----------|----------|----------|
| 1074.164 | 10.93042 | 1066.346 | 10.93857 | 1059.342 | 10.9273  | 1054.386 | 10.95505 | 1047.363 |
| 1074.244 | 10.93336 | 1066.317 | 10.94    | 1059.288 | 10.92966 | 1054.209 | 10.95746 | 1047.149 |
| 1074.34  | 10.93642 | 1066.298 | 10.94317 | 1059.172 | 10.9327  | 1053.983 | 10.95988 | 1046.938 |
| 1074.442 | 10.93948 | 1066.285 | 10.94606 | 1059.076 | 10.93518 | 1053.805 | 10.96276 | 1046.689 |
| 1074.541 | 10.9435  | 1066.274 | 10.94895 | 1058.985 | 10.93766 | 1053.631 | 10.9653  | 1046.476 |
| 1074.673 | 10.94667 | 1066.279 | 10.95    | 1058.952 | 10.94    | 1053.469 | 10.96783 | 1046.267 |
| 1074.808 | 10.94985 | 1066.291 | 10.9533  | 1058.854 | 10.94283 | 1053.276 | 10.97    | 1046.09  |
| 1074.923 | 10.95363 | 1066.31  | 10.95631 | 1058.774 | 10.94543 | 1053.106 | 10.9729  | 1045.857 |
| 1075.093 | 10.95693 | 1066.34  | 10.95932 | 1058.701 | 10.94802 | 1052.94  | 10.97555 | 1045.65  |
| 1075.265 | 10.96    | 1066.376 | 10.96043 | 1058.675 | 10.95    | 1052.816 | 10.9782  | 1045.447 |
| 1075.392 | 10.96377 | 1066.425 | 10.96344 | 1058.606 | 10.95297 | 1052.632 | 10.98    | 1045.311 |
| 1075.605 | 10.96718 | 1066.485 | 10.96657 | 1058.546 | 10.95568 | 1052.471 | 10.98303 | 1045.085 |
| 1075.817 | 10.97    | 1066.541 | 10.9697  | 1058.494 | 10.95839 | 1052.314 | 10.9858  | 1044.886 |
| 1075.953 | 10.9739  | 1066.623 | 10.97358 | 1058.433 | 10.96    | 1052.224 | 10.98858 | 1044.691 |
| 1076.211 | 10.97743 | 1066.715 | 10.97683 | 1058.395 | 10.9631  | 1052.051 | 10.99    | 1044.592 |
| 1076.615 | 10.98    | 1066.788 | 10.98    | 1058.366 | 10.96594 | 1051.901 | 10.99317 | 1044.375 |
| 1076.914 | 10.98403 | 1066.907 | 10.98372 | 1058.335 | 10.96877 | 1051.756 | 10.99606 | 1044.186 |
| 1077.377 | 10.98768 | 1067.034 | 10.98709 | 1058.322 | 10.97    | 1051.695 | 10.99896 | 1044.001 |
| 1077.718 | 10.99    | 1067.12  | 10.99    | 1058.317 | 10.97324 | 1051.535 | 11       | 1043.935 |
| 1078.24  | 10.99416 | 1067.28  | 10.99385 | 1058.316 | 10.9762  | 1051.399 | 11.00331 | 1043.729 |
| 1078.625 | 11       | 1067.548 | 10.99734 | 1058.33  | 10.97915 | 1051.268 | 11.00633 | 1043.551 |
| 1079.211 | 11.00416 | 1067.746 | 11       | 1058.347 | 10.98042 | 1051.213 | 11.00935 | 1043.379 |
| 1079.641 | 11.01    | 1068.069 | 11.00399 | 1058.377 | 10.98338 | 1051.087 | 11.01043 | 1043.317 |
| 1080.291 | 11.01416 | 1068.306 | 11.0076  | 1058.421 | 10.98646 | 1050.966 | 11.01345 | 1043.149 |
| 1080.768 | 11.02    | 1068.685 | 11.01    | 1058.456 | 10.98954 | 1050.851 | 11.01659 | 1042.984 |
| 1081.486 | 11.02416 | 1068.963 | 11.01413 | 1058.521 | 10.99352 | 1050.708 | 11.01974 | 1042.826 |
| 1082.012 | 11.03    | 1069.4   | 11.01786 | 1058.599 | 10.99672 | 1050.605 | 11.02359 | 1042.637 |
| 1082.207 | 11.03416 | 1069.72  | 11.02    | 1058.648 | 10.99992 | 1050.509 | 11.02686 | 1042.488 |
| 1082.394 | 11.04    | 1070.219 | 11.02426 | 1058.752 | 11.00366 | 1050.401 | 11.03    | 1042.352 |
| 1082.538 | 11.04416 | 1070.582 | 11.03    | 1058.933 | 11.00698 | 1050.319 | 11.03374 | 1042.194 |
| 1082.682 | 11.05    | 1071.144 | 11.03426 | 1059.074 | 11.01    | 1050.25  | 11.03713 | 1042.064 |
| 1082.822 | 11.05416 | 1071.553 | 11.04    | 1059.307 | 11.0138  | 1050.168 | 11.04    | 1041.959 |
| 1082.979 | 11.06    | 1072.18  | 11.04426 | 1059.487 | 11.01724 | 1050.108 | 11.04388 | 1041.822 |
| 1083.127 | 11.06383 | 1072.599 | 11.05    | 1059.774 | 11.02    | 1050.066 | 11.0474  | 1041.713 |
| 1083.371 | 11.06491 | 1072.72  | 11.05426 | 1059.994 | 11.02394 | 1050.011 | 11.05    | 1041.637 |
| 1083.587 | 11.06692 | 1072.95  | 11.06    | 1060.337 | 11.02751 | 1049.976 | 11.05402 | 1041.524 |
| 1083.794 | 11.06799 | 1073.073 | 11.06426 | 1060.599 | 11.03    | 1049.957 | 11.05767 | 1041.438 |
| 1083.976 | 11.06905 | 1073.197 | 11.07    | 1060.999 | 11.03408 | 1049.932 | 11.06    | 1041.387 |
| 1084.16  | 11.07015 | 1073.325 | 11.07426 | 1061.304 | 11.03778 | 1049.926 | 11.06417 | 1041.302 |
| 1084.378 | 11.07139 | 1073.472 | 11.08    | 1061.764 | 11.04    | 1049.926 | 11.07    | 1041.219 |
| 1084.607 | 11.07269 | 1073.627 | 11.08426 | 1062.114 | 11.04422 | 1049.933 | 11.07417 | 1041.166 |
| 1084.831 | 11.07449 | 1073.843 | 11.09    | 1062.636 | 11.05    | 1049.982 | 11.08    | 1041.13  |
| 1085.085 | 11.07563 | 1073.983 | 11.09328 | 1062.94  | 11.05422 | 1050.024 | 11.08417 | 1041.109 |
| 1085.263 | 11.07701 | 1074.153 | 11.09437 | 1063.044 | 11.06    | 1050.121 | 11.09    | 1041.121 |
| 1085.487 | 11.0784  | 1074.325 | 11.0964  | 1063.241 | 11.06422 | 1050.199 | 11.09417 | 1041.135 |
| 1085.648 | 11.07978 | 1074.499 | 11.09747 | 1063.346 | 11.07    | 1050.347 | 11.1     | 1041.195 |
| 1085.886 | 11.08158 | 1074.728 | 11.09855 | 1063.452 | 11.07422 | 1050.462 | 11.10417 | 1041.245 |

|          |          |          |          |          |          |          |          |          |
|----------|----------|----------|----------|----------|----------|----------|----------|----------|
| 1086.059 | 11.08303 | 1074.914 | 11.09962 | 1063.559 | 11.08    | 1050.662 | 11.11    | 1041.356 |
| 1086.234 | 11.08439 | 1075.09  | 11.10112 | 1063.71  | 11.08422 | 1050.815 | 11.11417 | 1041.442 |
| 1086.409 | 11.08557 | 1075.246 | 11.10257 | 1063.858 | 11.09    | 1051.07  | 11.12    | 1041.606 |
| 1086.82  | 11.08676 | 1075.402 | 11.1046  | 1064.069 | 11.09422 | 1051.263 | 11.12417 | 1041.73  |
| 1087.225 | 11.08883 | 1075.679 | 11.10591 | 1064.206 | 11.1     | 1051.574 | 11.13    | 1041.949 |
| 1087.67  | 11.09    | 1075.836 | 11.10736 | 1064.361 | 11.10422 | 1051.809 | 11.13417 | 1042.112 |
| 1088.02  | 11.09216 | 1076.133 | 11.10881 | 1064.517 | 11.11    | 1052.177 | 11.14    | 1042.387 |
| 1088.914 | 11.09366 | 1076.341 | 11.11    | 1064.646 | 11.11422 | 1052.454 | 11.14417 | 1042.59  |
| 1089.329 | 11.09516 | 1076.551 | 11.11166 | 1064.827 | 11.12    | 1052.883 | 11.15    | 1042.924 |
| 1089.772 | 11.09666 | 1076.763 | 11.11326 | 1065.006 | 11.12316 | 1053.123 | 11.15355 | 1043.132 |
| 1090.221 | 11.1     | 1077.242 | 11.11562 | 1065.273 | 11.12427 | 1053.209 | 11.15463 | 1043.198 |
| 1090.64  | 11.10171 | 1077.491 | 11.11719 | 1065.453 | 11.12601 | 1053.348 | 11.15667 | 1043.327 |
| 1090.882 | 11.1048  | 1077.95  | 11.11892 | 1065.655 | 11.12785 | 1053.497 | 11.15776 | 1043.396 |
| 1091.136 | 11.10788 | 1078.419 | 11.12    | 1065.781 | 11.12969 | 1053.649 | 11.15884 | 1043.466 |
| 1091.341 | 11.11    | 1078.746 | 11.12181 | 1065.997 | 11.13096 | 1053.755 | 11.15992 | 1043.536 |
| 1091.581 | 11.11352 | 1079.293 | 11.12321 | 1066.166 | 11.13243 | 1053.879 | 11.16108 | 1043.613 |
| 1091.78  | 11.11583 | 1079.662 | 11.12461 | 1066.338 | 11.13447 | 1054.056 | 11.1624  | 1043.703 |
| 1091.984 | 11.1169  | 1079.834 | 11.12602 | 1066.511 | 11.13578 | 1054.171 | 11.16371 | 1043.793 |
| 1092.183 | 11.11836 | 1080.069 | 11.12843 | 1066.811 | 11.13725 | 1054.301 | 11.16486 | 1043.872 |
| 1092.506 | 11.11951 | 1080.257 | 11.13    | 1067.009 | 11.13871 | 1054.432 | 11.166   | 1043.953 |
| 1092.787 | 11.12081 | 1080.47  | 11.13252 | 1067.333 | 11.14    | 1054.55  | 11.16743 | 1044.055 |
| 1093.108 | 11.12206 | 1080.674 | 11.13554 | 1067.732 | 11.14167 | 1054.704 | 11.16885 | 1044.158 |
| 1093.418 | 11.12331 | 1080.88  | 11.13857 | 1068.14  | 11.1431  | 1054.838 | 11.17    | 1044.243 |
| 1093.788 | 11.1251  | 1081.176 | 11.14    | 1068.334 | 11.14561 | 1055.077 | 11.17162 | 1044.364 |
| 1094.16  | 11.12631 | 1081.378 | 11.14203 | 1068.612 | 11.1472  | 1055.232 | 11.17331 | 1044.493 |
| 1094.467 | 11.12805 | 1081.668 | 11.14325 | 1068.78  | 11.1488  | 1055.389 | 11.17577 | 1044.685 |
| 1094.738 | 11.12969 | 1081.944 | 11.14522 | 1069.056 | 11.15    | 1055.509 | 11.17739 | 1044.814 |
| 1095.005 | 11.13094 | 1082.154 | 11.14719 | 1069.334 | 11.15182 | 1055.693 | 11.17901 | 1044.945 |
| 1095.242 | 11.13239 | 1082.4   | 11.14826 | 1069.486 | 11.15314 | 1055.828 | 11.18023 | 1045.045 |
| 1095.457 | 11.13365 | 1082.614 | 11.14932 | 1069.638 | 11.15446 | 1055.965 | 11.18169 | 1045.167 |
| 1095.674 | 11.13608 | 1083.03  | 11.15039 | 1069.792 | 11.15578 | 1056.104 | 11.18315 | 1045.29  |
| 1095.973 | 11.13809 | 1083.376 | 11.15159 | 1069.965 | 11.15798 | 1056.338 | 11.1846  | 1045.416 |
| 1096.439 | 11.14    | 1083.706 | 11.15334 | 1070.217 | 11.16    | 1056.556 | 11.1874  | 1045.66  |
| 1096.64  | 11.14141 | 1083.951 | 11.15516 | 1070.483 | 11.16229 | 1056.81  | 11.19    | 1045.894 |
| 1096.916 | 11.14278 | 1084.191 | 11.15637 | 1070.659 | 11.16428 | 1057.033 | 11.19291 | 1046.164 |
| 1097.389 | 11.14399 | 1084.402 | 11.15739 | 1070.81  | 11.16825 | 1057.495 | 11.19463 | 1046.326 |
| 1097.725 | 11.14504 | 1084.588 | 11.15911 | 1071.063 | 11.16955 | 1057.647 | 11.19603 | 1046.46  |
| 1098.317 | 11.1461  | 1084.774 | 11.16084 | 1071.318 | 11.17063 | 1057.774 | 11.19752 | 1046.604 |
| 1098.553 | 11.14794 | 1085.101 | 11.16211 | 1071.508 | 11.17169 | 1057.9   | 11.19935 | 1046.782 |
| 1099.093 | 11.14979 | 1085.429 | 11.1632  | 1071.671 | 11.17306 | 1058.063 | 11.20043 | 1046.888 |
| 1099.637 | 11.15127 | 1085.694 | 11.16491 | 1071.927 | 11.17413 | 1058.192 | 11.20154 | 1046.998 |
| 1100.13  | 11.15239 | 1085.895 | 11.16644 | 1072.158 | 11.1753  | 1058.334 | 11.20277 | 1047.12  |
| 1100.558 | 11.15351 | 1086.097 | 11.16798 | 1072.391 | 11.17638 | 1058.463 | 11.20396 | 1047.239 |
| 1101.078 | 11.15462 | 1086.3   | 11.17    | 1072.698 | 11.17744 | 1058.592 | 11.2051  | 1047.353 |
| 1101.413 | 11.15658 | 1086.655 | 11.17162 | 1072.947 | 11.17849 | 1058.72  | 11.20646 | 1047.491 |
| 1101.75  | 11.15854 | 1087.013 | 11.17294 | 1073.15  | 11.17987 | 1058.889 | 11.20749 | 1047.595 |
| 1102.088 | 11.16    | 1087.281 | 11.17476 | 1073.43  | 11.18157 | 1059.099 | 11.20852 | 1047.7   |

|          |          |          |          |          |          |          |          |          |
|----------|----------|----------|----------|----------|----------|----------|----------|----------|
| 1102.704 | 11.16224 | 1087.693 | 11.17591 | 1073.61  | 11.18313 | 1059.292 | 11.20955 | 1047.805 |
| 1102.994 | 11.1642  | 1088.058 | 11.17793 | 1073.925 | 11.18549 | 1059.586 | 11.21072 | 1047.926 |
| 1103.227 | 11.16582 | 1088.361 | 11.17995 | 1074.242 | 11.18655 | 1059.719 | 11.21195 | 1048.052 |
| 1103.324 | 11.16744 | 1088.666 | 11.18211 | 1074.583 | 11.18759 | 1059.851 | 11.21311 | 1048.171 |
| 1103.458 | 11.16907 | 1088.972 | 11.18358 | 1074.817 | 11.18896 | 1060.024 | 11.21412 | 1048.277 |
| 1103.717 | 11.17023 | 1089.193 | 11.18564 | 1075.147 | 11.19    | 1060.156 | 11.21513 | 1048.383 |
| 1103.839 | 11.17186 | 1089.5   | 11.18758 | 1075.46  | 11.19136 | 1060.329 | 11.21614 | 1048.489 |
| 1104.169 | 11.17333 | 1089.783 | 11.18952 | 1075.774 | 11.19331 | 1060.578 | 11.21792 | 1048.676 |
| 1104.854 | 11.17481 | 1090.067 | 11.19222 | 1076.212 | 11.19467 | 1060.754 | 11.21969 | 1048.864 |
| 1105.182 | 11.17694 | 1090.476 | 11.19416 | 1076.531 | 11.19603 | 1060.93  | 11.22096 | 1048.999 |
| 1105.878 | 11.17907 | 1090.889 | 11.19574 | 1076.791 | 11.19767 | 1061.143 | 11.22219 | 1049.132 |
| 1106.215 | 11.1803  | 1091.129 | 11.19731 | 1077.052 | 11.19931 | 1061.357 | 11.22359 | 1049.283 |
| 1106.926 | 11.18243 | 1091.544 | 11.19889 | 1077.314 | 11.20052 | 1061.516 | 11.22496 | 1049.432 |
| 1107.269 | 11.18672 | 1092.394 | 11.2     | 1077.5   | 11.20192 | 1061.701 | 11.22623 | 1049.57  |
| 1107.994 | 11.19    | 1093.049 | 11.2018  | 1077.801 | 11.20352 | 1061.913 | 11.22786 | 1049.75  |
| 1108.345 | 11.19491 | 1094.035 | 11.20348 | 1078.084 | 11.20572 | 1062.206 | 11.23    | 1049.986 |
| 1109.084 | 11.2     | 1095.081 | 11.20515 | 1078.368 | 11.20711 | 1062.393 | 11.23181 | 1050.187 |
| 1109.442 | 11.20491 | 1096.093 | 11.20784 | 1078.827 | 11.20956 | 1062.724 | 11.23367 | 1050.396 |
| 1110.196 | 11.20836 | 1096.817 | 11.21    | 1079.198 | 11.2128  | 1063.164 | 11.23478 | 1050.52  |
| 1110.561 | 11.21    | 1097.096 | 11.21307 | 1079.728 | 11.21524 | 1063.501 | 11.23645 | 1050.709 |
| 1111.33  | 11.21224 | 1097.272 | 11.21885 | 1080.746 | 11.21714 | 1063.764 | 11.23811 | 1050.899 |
| 1111.701 | 11.21392 | 1097.414 | 11.22    | 1080.949 | 11.21903 | 1064.027 | 11.23978 | 1051.089 |
| 1112.485 | 11.21503 | 1097.518 | 11.2266  | 1082.125 | 11.22027 | 1064.201 | 11.2419  | 1051.334 |
| 1112.864 | 11.21622 | 1097.659 | 11.23    | 1082.742 | 11.22197 | 1064.441 | 11.24398 | 1051.576 |
| 1113.512 | 11.21736 | 1097.803 | 11.2366  | 1083.95  | 11.2234  | 1064.643 | 11.24599 | 1051.811 |
| 1113.633 | 11.21914 | 1098.011 | 11.24    | 1084.584 | 11.22483 | 1064.846 | 11.248   | 1052.048 |
| 1113.791 | 11.22014 | 1098.12  | 11.2466  | 1085.825 | 11.22626 | 1065.05  | 11.24902 | 1052.17  |
| 1114.245 | 11.22804 | 1099     | 11.24874 | 1086.233 | 11.23    | 1065.587 | 11.25003 | 1052.289 |
| 1114.86  | 11.23    | 1099.222 | 11.24987 | 1086.45  | 11.23163 | 1065.823 | 11.25165 | 1052.483 |
| 1115.386 | 11.2379  | 1100.124 | 11.25125 | 1086.714 | 11.23481 | 1066.289 | 11.25308 | 1052.654 |
| 1116.08  | 11.24    | 1100.365 | 11.2559  | 1087.618 | 11.23716 | 1066.636 | 11.25546 | 1052.943 |
| 1116.615 | 11.2479  | 1101.281 | 11.26    | 1088.425 | 11.24    | 1067.057 | 11.25761 | 1053.204 |
| 1117.321 | 11.24892 | 1101.4   | 11.26531 | 1089.475 | 11.24269 | 1067.458 | 11.25975 | 1053.468 |
| 1117.866 | 11.24999 | 1101.527 | 11.27    | 1090.422 | 11.24874 | 1068.381 | 11.26245 | 1053.801 |
| 1118.585 | 11.25144 | 1101.698 | 11.27531 | 1091.499 | 11.24974 | 1068.535 | 11.26481 | 1054.095 |
| 1119.14  | 11.25641 | 1102.29  | 11.28    | 1092.469 | 11.25104 | 1068.733 | 11.26716 | 1054.392 |
| 1119.871 | 11.26    | 1102.719 | 11.28323 | 1093.14  | 11.2542  | 1069.223 | 11.27    | 1054.753 |
| 1120.436 | 11.26568 | 1103.403 | 11.28577 | 1093.499 | 11.25908 | 1069.989 | 11.27269 | 1055.096 |
| 1121.18  | 11.27    | 1103.929 | 11.28735 | 1093.675 | 11.2607  | 1070.245 | 11.27892 | 1055.911 |
| 1121.754 | 11.27568 | 1104.625 | 11.29    | 1093.985 | 11.26557 | 1071.018 | 11.28    | 1056.053 |
| 1122.512 | 11.28    | 1105.161 | 11.29181 | 1094.203 | 11.27    | 1071.735 | 11.28712 | 1056.996 |
| 1123.095 | 11.28568 | 1105.869 | 11.29829 | 1095.038 | 11.27557 | 1072.644 | 11.29    | 1057.386 |
| 1123.866 | 11.29    | 1106.415 | 11.3     | 1095.259 | 11.28    | 1073.381 | 11.29712 | 1058.359 |
| 1124.46  | 11.29568 | 1107.136 | 11.3074  | 1096.211 | 11.28557 | 1074.314 | 11.3     | 1058.761 |
| 1125.243 | 11.3     | 1107.691 | 11.31    | 1096.547 | 11.29    | 1075.071 | 11.30712 | 1059.763 |
| 1125.847 | 11.30568 | 1108.425 | 11.31404 | 1097.074 | 11.29557 | 1076.03  | 11.31    | 1060.177 |
| 1126.644 | 11.31    | 1108.99  | 11.31511 | 1097.215 | 11.3     | 1076.807 | 11.31712 | 1061.209 |

|          |          |          |          |          |          |          |          |          |
|----------|----------|----------|----------|----------|----------|----------|----------|----------|
| 1127.258 | 11.31568 | 1109.737 | 11.31638 | 1097.383 | 11.30557 | 1077.791 | 11.32    | 1061.635 |
| 1128.067 | 11.32    | 1110.311 | 11.3176  | 1097.543 | 11.31    | 1078.588 | 11.32712 | 1062.696 |
| 1128.692 | 11.32568 | 1111.071 | 11.3195  | 1097.793 | 11.31557 | 1079.598 | 11.33    | 1063.134 |
| 1129.515 | 11.33    | 1111.656 | 11.32121 | 1098.019 | 11.32    | 1080.416 | 11.33712 | 1064.225 |
| 1130.149 | 11.33568 | 1112.428 | 11.3286  | 1099.011 | 11.32557 | 1081.451 | 11.34    | 1064.675 |
| 1130.986 | 11.34    | 1113.023 | 11.33    | 1099.2   | 11.33    | 1082.289 | 11.34712 | 1065.796 |
| 1131.631 | 11.34568 | 1113.808 | 11.33106 | 1099.343 | 11.33557 | 1083.351 | 11.35    | 1066.257 |
| 1132.481 | 11.35    | 1114.413 | 11.33844 | 1100.344 | 11.34    | 1084.21  | 11.35712 | 1067.407 |
| 1133.136 | 11.35568 | 1115.212 | 11.34    | 1100.557 | 11.34557 | 1085.298 | 11.36    | 1067.88  |
| 1134     | 11.36    | 1115.827 | 11.34106 | 1100.701 | 11.35    | 1086.177 | 11.36276 | 1068.337 |
| 1134.665 | 11.36568 | 1116.639 | 11.34844 | 1101.719 | 11.35557 | 1087.291 | 11.36941 | 1069.457 |
| 1135.543 | 11.37    | 1117.264 | 11.35    | 1101.936 | 11.36    | 1088.192 | 11.37095 | 1069.717 |
| 1136.219 | 11.37568 | 1118.089 | 11.35106 | 1102.083 | 11.36557 | 1089.333 | 11.3776  | 1070.848 |
| 1137.11  | 11.38    | 1118.725 | 11.35844 | 1103.118 | 11.37    | 1090.255 | 11.38    | 1071.262 |
| 1137.797 | 11.38568 | 1119.564 | 11.36    | 1103.339 | 11.37557 | 1091.422 | 11.3876  | 1072.586 |
| 1138.702 | 11.39    | 1120.209 | 11.36106 | 1103.488 | 11.38    | 1092.366 | 11.39    | 1073.011 |
| 1139.399 | 11.39568 | 1121.062 | 11.36844 | 1104.541 | 11.38557 | 1093.56  | 11.3976  | 1074.367 |
| 1140.318 | 11.4     | 1121.718 | 11.37    | 1104.765 | 11.39    | 1094.525 | 11.4     | 1074.801 |
| 1141.027 | 11.40568 | 1122.584 | 11.37106 | 1104.917 | 11.39557 | 1095.746 | 11.4076  | 1076.189 |
| 1141.96  | 11.41    | 1123.25  | 11.37844 | 1105.987 | 11.4     | 1096.733 | 11.41    | 1076.634 |
| 1142.679 | 11.41568 | 1124.13  | 11.38    | 1106.214 | 11.40441 | 1097.72  | 11.4176  | 1078.055 |
| 1143.626 | 11.42    | 1124.807 | 11.38106 | 1106.369 | 11.40698 | 1098.19  | 11.42    | 1078.51  |
| 1144.356 | 11.42568 | 1125.701 | 11.38844 | 1107.456 | 11.40876 | 1098.407 | 11.4276  | 1079.963 |
| 1144.841 | 11.43    | 1126.388 | 11.39    | 1107.688 | 11.41    | 1098.547 | 11.43    | 1080.428 |
| 1145.306 | 11.43568 | 1127.296 | 11.39106 | 1107.845 | 11.41203 | 1098.817 | 11.4376  | 1081.914 |
| 1145.537 | 11.44    | 1127.994 | 11.39844 | 1108.95  | 11.41405 | 1099.177 | 11.44    | 1082.389 |
| 1145.811 | 11.44568 | 1128.916 | 11.4     | 1109.185 | 11.41521 | 1099.384 | 11.4476  | 1083.908 |
| 1145.941 | 11.45    | 1129.625 | 11.40106 | 1109.344 | 11.41667 | 1099.616 | 11.45    | 1084.394 |
| 1146.063 | 11.45568 | 1130.561 | 11.40844 | 1110.467 | 11.41806 | 1099.815 | 11.4576  | 1085.946 |
| 1146.177 | 11.46    | 1131.28  | 11.41    | 1110.706 | 11.42    | 1100.103 | 11.46    | 1086.442 |
| 1146.311 | 11.46568 | 1132.23  | 11.41106 | 1110.868 | 11.4211  | 1100.272 | 11.4676  | 1088.027 |
| 1146.464 | 11.47    | 1132.961 | 11.41844 | 1112.009 | 11.42736 | 1101.262 | 11.47    | 1088.534 |
| 1146.658 | 11.47568 | 1133.925 | 11.42    | 1112.252 | 11.43    | 1101.678 | 11.4776  | 1090.153 |
| 1146.731 | 11.48    | 1134.667 | 11.42106 | 1112.416 | 11.43715 | 1102.81  | 11.48    | 1090.67  |
| 1146.869 | 11.48568 | 1135.645 | 11.42844 | 1113.575 | 11.44    | 1103.265 | 11.4876  | 1092.323 |
| 1146.981 | 11.49    | 1136.398 | 11.43    | 1113.822 | 11.44715 | 1104.415 | 11.49    | 1092.851 |
| 1147.173 | 11.49568 | 1137.391 | 11.43106 | 1113.989 | 11.45    | 1104.877 | 11.4976  | 1094.537 |
| 1147.244 | 11.5     | 1138.154 | 11.43844 | 1115.166 | 11.45715 | 1106.044 | 11.5     | 1095.076 |
| 1147.338 | 11.50568 | 1139.162 | 11.44    | 1115.416 | 11.46    | 1106.514 | 11.5076  | 1096.796 |
| 1147.441 | 11.51    | 1139.936 | 11.44106 | 1115.586 | 11.46715 | 1107.699 | 11.51    | 1097.346 |
| 1147.531 | 11.51568 | 1140.959 | 11.44844 | 1116.781 | 11.47    | 1108.176 | 11.51406 | 1098.28  |
| 1147.618 | 11.52    | 1141.744 | 11.45    | 1117.035 | 11.47715 | 1109.378 | 11.51512 | 1098.526 |
| 1147.7   | 11.52568 | 1142.781 | 11.45106 | 1117.208 | 11.48    | 1109.862 | 11.5164  | 1098.822 |
| 1147.813 | 11.53    | 1143.578 | 11.45844 | 1118.421 | 11.48715 | 1111.083 | 11.51761 | 1099.106 |
| 1147.896 | 11.53109 | 1143.78  | 11.46    | 1118.679 | 11.49    | 1111.574 | 11.51952 | 1099.55  |
| 1147.999 | 11.53235 | 1144.012 | 11.46106 | 1118.854 | 11.49715 | 1112.813 | 11.52121 | 1099.945 |
| 1148.067 | 11.53418 | 1144.352 | 11.46844 | 1120.086 | 11.5     | 1113.311 | 11.5286  | 1101.704 |

|          |          |          |          |          |          |          |          |          |
|----------|----------|----------|----------|----------|----------|----------|----------|----------|
| 1148.155 | 11.53562 | 1144.616 | 11.47    | 1120.348 | 11.50715 | 1114.569 | 11.53    | 1102.037 |
| 1148.207 | 11.53701 | 1144.862 | 11.47106 | 1120.526 | 11.51    | 1115.074 | 11.53101 | 1102.279 |
| 1148.252 | 11.53841 | 1145.094 | 11.47844 | 1121.776 | 11.51715 | 1116.35  | 11.53811 | 1103.994 |
| 1148.291 | 11.5398  | 1145.31  | 11.48    | 1122.041 | 11.52    | 1116.863 | 11.54    | 1104.453 |
| 1148.315 | 11.54159 | 1145.576 | 11.48106 | 1122.222 | 11.52715 | 1118.157 | 11.5471  | 1106.186 |
| 1148.354 | 11.54335 | 1145.801 | 11.48844 | 1123.491 | 11.53    | 1118.677 | 11.55    | 1106.905 |
| 1148.383 | 11.54729 | 1146.228 | 11.49    | 1123.761 | 11.53108 | 1118.876 | 11.5571  | 1108.671 |
| 1148.404 | 11.5498  | 1146.45  | 11.49106 | 1123.944 | 11.53226 | 1119.092 | 11.56    | 1109.403 |
| 1148.417 | 11.55254 | 1146.655 | 11.49844 | 1125.232 | 11.54    | 1120.526 | 11.5671  | 1111.202 |
| 1148.429 | 11.55421 | 1146.775 | 11.5     | 1125.505 | 11.54134 | 1120.775 | 11.57    | 1111.948 |
| 1148.45  | 11.55566 | 1146.878 | 11.50106 | 1125.691 | 11.54958 | 1122.321 | 11.57422 | 1113.036 |
| 1148.461 | 11.5571  | 1146.98  | 11.50844 | 1126.998 | 11.55118 | 1122.621 | 11.57746 | 1113.69  |
| 1148.466 | 11.55855 | 1147.082 | 11.51    | 1127.276 | 11.55941 | 1124.176 | 11.57947 | 1114.061 |
| 1148.474 | 11.56    | 1147.183 | 11.51106 | 1127.465 | 11.56118 | 1124.512 | 11.5823  | 1114.588 |
| 1148.475 | 11.56165 | 1147.298 | 11.51844 | 1128.79  | 11.56941 | 1126.087 | 11.58906 | 1115.924 |
| 1148.474 | 11.5631  | 1147.394 | 11.52    | 1129.071 | 11.57118 | 1126.427 | 11.59097 | 1116.301 |
| 1148.47  | 11.56431 | 1147.472 | 11.52106 | 1129.262 | 11.57941 | 1128.022 | 11.59772 | 1117.635 |
| 1148.468 | 11.56551 | 1147.546 | 11.52844 | 1130.607 | 11.58118 | 1128.367 | 11.6     | 1118.084 |
| 1148.462 | 11.56672 | 1147.617 | 11.53    | 1130.894 | 11.58941 | 1129.98  | 11.60772 | 1119.619 |
| 1148.458 | 11.57    | 1147.789 | 11.53108 | 1131.093 | 11.59118 | 1130.329 | 11.61    | 1120.079 |
| 1148.449 | 11.57138 | 1147.853 | 11.53226 | 1131.309 | 11.59941 | 1131.961 | 11.61772 | 1121.635 |
| 1148.444 | 11.57495 | 1147.966 | 11.54    | 1132.75  | 11.60118 | 1132.314 | 11.62    | 1122.094 |
| 1148.434 | 11.57852 | 1148.05  | 11.54134 | 1133     | 11.60941 | 1133.964 | 11.62772 | 1123.663 |
| 1148.429 | 11.58    | 1148.081 | 11.54958 | 1134.553 | 11.61118 | 1134.32  | 11.63    | 1124.131 |
| 1148.42  | 11.58408 | 1148.155 | 11.55118 | 1134.854 | 11.61941 | 1135.988 | 11.63772 | 1125.718 |
| 1148.415 | 11.58648 | 1148.187 | 11.55941 | 1136.417 | 11.62118 | 1136.348 | 11.64    | 1126.187 |
| 1148.407 | 11.58888 | 1148.217 | 11.56118 | 1136.754 | 11.62941 | 1138.033 | 11.64772 | 1127.788 |
| 1148.402 | 11.59    | 1148.231 | 11.56941 | 1138.337 | 11.63118 | 1138.396 | 11.65    | 1128.264 |
| 1148.394 | 11.59275 | 1148.264 | 11.57118 | 1138.679 | 11.63941 | 1140.098 | 11.65772 | 1129.88  |
| 1148.39  | 11.59515 | 1148.291 | 11.57941 | 1140.281 | 11.64118 | 1140.465 | 11.66    | 1130.358 |
| 1148.382 | 11.59726 | 1148.312 | 11.58118 | 1140.626 | 11.64941 | 1142.183 | 11.66772 | 1131.988 |
| 1148.378 | 11.59938 | 1148.33  | 11.58941 | 1142.247 | 11.65118 | 1142.553 | 11.67    | 1132.472 |
| 1148.371 | 11.60242 | 1148.353 | 11.59118 | 1142.597 | 11.65649 | 1143.669 | 11.67772 | 1134.115 |
| 1148.367 | 11.60721 | 1148.37  | 11.59805 | 1143.966 | 11.66    | 1144.392 | 11.68    | 1134.602 |
| 1148.36  | 11.61    | 1148.376 | 11.5994  | 1144.235 | 11.66175 | 1144.723 | 11.68772 | 1136.259 |
| 1148.357 | 11.61548 | 1148.383 | 11.60134 | 1144.614 | 11.6635  | 1145.018 | 11.69    | 1136.75  |
| 1148.35  | 11.62    | 1148.383 | 11.60334 | 1144.965 | 11.66658 | 1145.468 | 11.69772 | 1138.419 |
| 1148.347 | 11.62548 | 1148.382 | 11.60784 | 1145.626 | 11.66966 | 1145.835 | 11.7     | 1138.913 |
| 1148.341 | 11.63    | 1148.381 | 11.61    | 1145.883 | 11.67089 | 1145.958 | 11.70678 | 1140.39  |
| 1148.34  | 11.63548 | 1148.38  | 11.61174 | 1146.058 | 11.67245 | 1146.097 | 11.70858 | 1140.783 |
| 1148.335 | 11.64    | 1148.376 | 11.61332 | 1146.198 | 11.67382 | 1146.21  | 11.71    | 1141.093 |
| 1148.332 | 11.64548 | 1148.371 | 11.6147  | 1146.312 | 11.67518 | 1146.319 | 11.71162 | 1141.448 |
| 1148.326 | 11.65    | 1148.365 | 11.61608 | 1146.42  | 11.67758 | 1146.508 | 11.72    | 1143.293 |
| 1148.323 | 11.65548 | 1148.357 | 11.6185  | 1146.605 | 11.6791  | 1146.629 | 11.72122 | 1143.56  |
| 1148.318 | 11.66    | 1148.352 | 11.62    | 1146.718 | 11.68022 | 1146.718 | 11.72409 | 1144.133 |
| 1148.315 | 11.66548 | 1148.346 | 11.62159 | 1146.839 | 11.68174 | 1146.84  | 11.72548 | 1144.397 |
| 1148.31  | 11.67    | 1148.342 | 11.62298 | 1146.945 | 11.68326 | 1146.96  | 11.72738 | 1144.726 |

|          |          |          |          |          |          |          |          |          |
|----------|----------|----------|----------|----------|----------|----------|----------|----------|
| 1148.307 | 11.67548 | 1148.337 | 11.62421 | 1147.04  | 11.68436 | 1147.047 | 11.73    | 1145.128 |
| 1148.303 | 11.68    | 1148.332 | 11.62544 | 1147.133 | 11.68547 | 1147.133 | 11.73108 | 1145.279 |
| 1148.3   | 11.68548 | 1148.327 | 11.62667 | 1147.225 | 11.68658 | 1147.216 | 11.73285 | 1145.496 |
| 1148.296 | 11.69    | 1148.323 | 11.62882 | 1147.381 | 11.68883 | 1147.376 | 11.7345  | 1145.677 |
| 1148.294 | 11.69548 | 1148.318 | 11.63    | 1147.462 | 11.69    | 1147.454 | 11.73625 | 1145.857 |
| 1148.289 | 11.7     | 1148.314 | 11.63225 | 1147.597 | 11.69234 | 1147.586 | 11.73801 | 1146.025 |
| 1148.287 | 11.70548 | 1148.31  | 11.63373 | 1147.676 | 11.69412 | 1147.671 | 11.74    | 1146.205 |
| 1148.283 | 11.71    | 1148.307 | 11.63892 | 1147.856 | 11.7     | 1147.848 | 11.74201 | 1146.381 |
| 1148.281 | 11.71548 | 1148.303 | 11.64    | 1147.89  | 11.70203 | 1147.904 | 11.74318 | 1146.483 |
| 1148.278 | 11.72    | 1148.299 | 11.64593 | 1148.04  | 11.70474 | 1147.958 | 11.74435 | 1146.585 |
| 1148.276 | 11.72548 | 1148.295 | 11.65    | 1148.095 | 11.70739 | 1148.004 | 11.74552 | 1146.687 |
| 1148.272 | 11.73    | 1148.292 | 11.65162 | 1148.116 | 11.71    | 1148.045 | 11.74961 | 1147.03  |
| 1148.271 | 11.73548 | 1148.289 | 11.65316 | 1148.135 | 11.71303 | 1148.091 | 11.75116 | 1147.154 |
| 1148.268 | 11.74    | 1148.286 | 11.65586 | 1148.169 | 11.71568 | 1148.126 | 11.75217 | 1147.23  |
| 1148.266 | 11.74548 | 1148.283 | 11.65812 | 1148.196 | 11.71782 | 1148.153 | 11.75318 | 1147.303 |
| 1148.263 | 11.75    | 1148.28  | 11.66    | 1148.218 | 11.71996 | 1148.177 | 11.75495 | 1147.416 |
| 1148.262 | 11.75548 | 1148.277 | 11.66258 | 1148.246 | 11.72244 | 1148.204 | 11.75671 | 1147.515 |
| 1148.259 | 11.76    | 1148.275 | 11.66484 | 1148.266 | 11.72618 | 1148.231 | 11.7598  | 1147.648 |
| 1148.257 | 11.76548 | 1148.272 | 11.6671  | 1148.282 | 11.72897 | 1148.246 | 11.76353 | 1147.788 |
| 1148.255 | 11.76948 | 1148.27  | 11.67    | 1148.297 | 11.73    | 1148.251 | 11.76994 | 1147.916 |
| 1148.254 | 11.77057 | 1148.27  | 11.67258 | 1148.308 | 11.73318 | 1148.263 | 11.77732 | 1148.046 |
| 1148.251 | 11.77458 | 1148.268 | 11.68    | 1148.315 | 11.74    | 1148.272 | 11.78    | 1148.089 |
| 1148.25  | 11.78    | 1148.265 | 11.68258 | 1148.317 | 11.74318 | 1148.275 | 11.78178 | 1148.111 |
| 1148.248 | 11.78458 | 1148.263 | 11.68722 | 1148.318 | 11.75    | 1148.278 | 11.7833  | 1148.131 |
| 1148.247 | 11.79    | 1148.261 | 11.69    | 1148.318 | 11.75318 | 1148.279 | 11.78482 | 1148.15  |
| 1148.245 | 11.79458 | 1148.259 | 11.6953  | 1148.319 | 11.76    | 1148.279 | 11.78747 | 1148.179 |
| 1148.244 | 11.8     | 1148.257 | 11.7     | 1148.318 | 11.76318 | 1148.279 | 11.78985 | 1148.201 |
| 1148.242 | 11.80458 | 1148.255 | 11.7053  | 1148.317 | 11.77    | 1148.276 | 11.79272 | 1148.224 |
| 1148.241 | 11.81    | 1148.253 | 11.71    | 1148.313 | 11.77318 | 1148.274 | 11.79791 | 1148.24  |
| 1148.24  | 11.81458 | 1148.251 | 11.7153  | 1148.308 | 11.78    | 1148.27  | 11.8     | 1148.244 |
| 1148.239 | 11.82    | 1148.25  | 11.72    | 1148.304 | 11.78318 | 1148.268 | 11.80593 | 1148.25  |
| 1148.237 | 11.82458 | 1148.248 | 11.7253  | 1148.299 | 11.79    | 1148.265 | 11.81    | 1148.249 |
| 1148.237 | 11.83    | 1148.247 | 11.73    | 1148.295 | 11.79318 | 1148.263 | 11.81593 | 1148.251 |
| 1148.235 | 11.83458 | 1148.245 | 11.7353  | 1148.292 | 11.8     | 1148.26  | 11.82    | 1148.254 |
| 1148.235 | 11.84    | 1148.244 | 11.74    | 1148.289 | 11.80318 | 1148.258 | 11.82541 | 1148.256 |
| 1148.234 | 11.84458 | 1148.242 | 11.7453  | 1148.285 | 11.81    | 1148.255 | 11.83    | 1148.255 |
| 1148.233 | 11.85    | 1148.241 | 11.75    | 1148.282 | 11.81318 | 1148.254 | 11.83534 | 1148.254 |
| 1148.232 | 11.85458 | 1148.24  | 11.7553  | 1148.278 | 11.82    | 1148.251 | 11.84    | 1148.25  |
| 1148.231 | 11.86    | 1148.239 | 11.76    | 1148.275 | 11.82318 | 1148.25  | 11.84534 | 1148.247 |
| 1148.23  | 11.86458 | 1148.238 | 11.7653  | 1148.272 | 11.83    | 1148.247 | 11.85    | 1148.245 |
| 1148.23  | 11.87    | 1148.236 | 11.77    | 1148.27  | 11.83318 | 1148.246 | 11.85534 | 1148.243 |
| 1148.229 | 11.87458 | 1148.236 | 11.7753  | 1148.267 | 11.84    | 1148.244 | 11.86    | 1148.241 |
| 1148.229 | 11.88    | 1148.235 | 11.78    | 1148.265 | 11.84318 | 1148.243 | 11.86534 | 1148.24  |
| 1148.228 | 11.88458 | 1148.234 | 11.7853  | 1148.263 | 11.85    | 1148.241 | 11.87    | 1148.239 |
| 1148.228 | 11.89    | 1148.233 | 11.79    | 1148.261 | 11.85318 | 1148.241 | 11.87534 | 1148.237 |
| 1148.227 | 11.89458 | 1148.232 | 11.7953  | 1148.258 | 11.86    | 1148.239 | 11.88    | 1148.235 |
| 1148.227 | 11.9     | 1148.231 | 11.8     | 1148.257 | 11.86318 | 1148.238 | 11.88534 | 1148.234 |

|          |          |          |          |          |          |          |          |          |
|----------|----------|----------|----------|----------|----------|----------|----------|----------|
| 1148.226 | 11.90458 | 1148.231 | 11.8053  | 1148.254 | 11.87    | 1148.237 | 11.89    | 1148.233 |
| 1148.226 | 11.91    | 1148.23  | 11.81    | 1148.253 | 11.87318 | 1148.236 | 11.89534 | 1148.232 |
| 1148.226 | 11.91458 | 1148.229 | 11.8153  | 1148.251 | 11.88    | 1148.235 | 11.9     | 1148.231 |
| 1148.226 | 11.92    | 1148.229 | 11.82    | 1148.249 | 11.88318 | 1148.234 | 11.90534 | 1148.231 |
| 1148.225 | 11.92458 | 1148.228 | 11.8253  | 1148.248 | 11.89    | 1148.233 | 11.91    | 1148.23  |
| 1148.225 | 11.92965 | 1148.228 | 11.83    | 1148.246 | 11.89318 | 1148.232 | 11.91534 | 1148.229 |
| 1148.225 | 11.93072 | 1148.228 | 11.8353  | 1148.245 | 11.9     | 1148.231 | 11.91994 | 1148.228 |
| 1148.225 | 11.9358  | 1148.227 | 11.84    | 1148.243 | 11.90318 | 1148.231 | 11.92526 | 1148.228 |
| 1148.225 | 11.94    | 1148.227 | 11.8453  | 1148.242 | 11.91    | 1148.23  | 11.92904 | 1148.228 |
| 1148.225 | 11.9458  | 1148.226 | 11.85    | 1148.241 | 11.91318 | 1148.23  | 11.93054 | 1148.227 |
| 1148.225 | 11.95    | 1148.226 | 11.8553  | 1148.239 | 11.91988 | 1148.229 | 11.93432 | 1148.227 |
| 1148.225 | 11.9558  | 1148.226 | 11.86    | 1148.238 | 11.92096 | 1148.229 | 11.93992 | 1148.227 |
| 1148.225 | 11.96    | 1148.226 | 11.8653  | 1148.237 | 11.92766 | 1148.228 | 11.9464  | 1148.226 |
| 1148.225 | 11.9658  | 1148.225 | 11.86983 | 1148.236 | 11.93    | 1148.228 | 11.95    | 1148.226 |
| 1148.225 | 11.97    | 1148.225 | 11.87517 | 1148.235 | 11.93766 | 1148.227 | 11.9564  | 1148.226 |
| 1148.225 | 11.9758  | 1148.225 | 11.88    | 1148.234 | 11.94    | 1148.227 | 11.96    | 1148.225 |
| 1148.225 | 11.98    | 1148.225 | 11.88517 | 1148.233 | 11.94766 | 1148.226 | 11.9664  | 1148.225 |
| 1148.225 | 11.9858  | 1148.225 | 11.89    | 1148.232 | 11.95    | 1148.226 | 11.97    | 1148.225 |
| 1148.226 | 11.99    | 1148.225 | 11.89517 | 1148.232 | 11.95766 | 1148.226 | 11.9764  | 1148.225 |
| 1148.226 | 11.9958  | 1148.225 | 11.9     | 1148.231 | 11.96    | 1148.226 | 11.98    | 1148.225 |
| 1148.226 | 12       | 1148.225 | 11.90517 | 1148.23  | 11.96766 | 1148.225 | 11.9864  | 1148.225 |
| 1148.226 | 12.0058  | 1148.225 | 11.91    | 1148.23  | 11.96996 | 1148.225 | 11.99    | 1148.225 |
| 1148.226 | 12.01    | 1148.225 | 11.91517 | 1148.229 | 11.97197 | 1148.225 | 11.9964  | 1148.225 |
| 1148.227 | 12.0158  | 1148.225 | 11.92    | 1148.228 | 11.98    | 1148.225 | 12       | 1148.225 |
| 1148.227 | 12.02    | 1148.225 | 11.92517 | 1148.228 | 11.98193 | 1148.225 | 12.0064  | 1148.225 |
| 1148.227 | 12.0258  | 1148.225 | 11.93    | 1148.227 | 11.99    | 1148.225 | 12.01    | 1148.225 |
| 1148.228 | 12.03    | 1148.225 | 11.93517 | 1148.227 | 11.99193 | 1148.225 | 12.0164  | 1148.225 |
| 1148.228 | 12.0358  | 1148.225 | 11.94    | 1148.227 | 12       | 1148.225 | 12.02    | 1148.225 |
| 1148.229 | 12.04    | 1148.226 | 11.94517 | 1148.226 | 12.00193 | 1148.225 | 12.0264  | 1148.225 |
| 1148.229 | 12.0458  | 1148.226 | 11.95    | 1148.226 | 12.01    | 1148.225 | 12.03    | 1148.225 |
| 1148.229 | 12.05    | 1148.226 | 11.95517 | 1148.226 | 12.01193 | 1148.225 | 12.0364  | 1148.225 |
| 1148.23  | 12.0558  | 1148.226 | 11.96    | 1148.225 | 12.02    | 1148.225 | 12.04    | 1148.226 |
| 1148.23  | 12.06    | 1148.227 | 11.96517 | 1148.225 | 12.02193 | 1148.225 | 12.0464  | 1148.226 |
| 1148.231 | 12.0658  | 1148.227 | 11.97    | 1148.225 | 12.03    | 1148.226 | 12.05    | 1148.226 |
| 1148.231 | 12.07    | 1148.227 | 11.97517 | 1148.225 | 12.03193 | 1148.226 | 12.0564  | 1148.226 |
| 1148.232 | 12.0758  | 1148.228 | 11.98    | 1148.225 | 12.04    | 1148.226 | 12.06    | 1148.227 |
| 1148.232 | 12.08    | 1148.228 | 11.98517 | 1148.225 | 12.04193 | 1148.226 | 12.0664  | 1148.227 |
| 1148.233 | 12.0858  | 1148.229 | 11.99    | 1148.225 | 12.05    | 1148.226 | 12.06996 | 1148.227 |
| 1148.233 | 12.09    | 1148.229 | 11.99517 | 1148.225 | 12.05193 | 1148.227 | 12.07392 | 1148.228 |
| 1148.234 | 12.0958  | 1148.229 | 12       | 1148.225 | 12.06    | 1148.227 | 12.08    | 1148.228 |
| 1148.235 | 12.1     | 1148.23  | 12.00517 | 1148.225 | 12.06193 | 1148.227 | 12.08384 | 1148.228 |
| 1148.235 | 12.1058  | 1148.23  | 12.01    | 1148.225 | 12.07    | 1148.228 | 12.09    | 1148.229 |
| 1148.236 | 12.11    | 1148.231 | 12.01517 | 1148.225 | 12.07193 | 1148.228 | 12.09384 | 1148.229 |
| 1148.236 | 12.1158  | 1148.231 | 12.02    | 1148.225 | 12.08    | 1148.228 | 12.1     | 1148.23  |
| 1148.237 | 12.12    | 1148.232 | 12.02517 | 1148.225 | 12.08193 | 1148.229 | 12.10384 | 1148.23  |
| 1148.237 | 12.1258  | 1148.232 | 12.03    | 1148.225 | 12.09    | 1148.229 | 12.11    | 1148.231 |
| 1148.238 | 12.13    | 1148.233 | 12.03517 | 1148.225 | 12.09193 | 1148.229 | 12.11384 | 1148.231 |

|          |         |          |          |          |          |          |          |          |
|----------|---------|----------|----------|----------|----------|----------|----------|----------|
| 1148.239 | 12.1358 | 1148.233 | 12.04    | 1148.226 | 12.1     | 1148.23  | 12.12    | 1148.232 |
| 1148.24  | 12.14   | 1148.234 | 12.04517 | 1148.226 | 12.10193 | 1148.23  | 12.12384 | 1148.232 |
| 1148.24  | 12.1458 | 1148.234 | 12.05    | 1148.226 | 12.11    | 1148.231 | 12.13    | 1148.233 |
| 1148.241 | 12.15   | 1148.235 | 12.05517 | 1148.226 | 12.11193 | 1148.231 | 12.13384 | 1148.233 |
| 1148.241 | 12.1558 | 1148.236 | 12.06    | 1148.227 | 12.12    | 1148.232 | 12.14    | 1148.234 |
| 1148.242 | 12.16   | 1148.236 | 12.06517 | 1148.227 | 12.12193 | 1148.232 | 12.14384 | 1148.234 |
| 1148.243 | 12.1658 | 1148.237 | 12.07    | 1148.227 | 12.13    | 1148.233 | 12.15    | 1148.235 |
| 1148.244 | 12.17   | 1148.237 | 12.07517 | 1148.228 | 12.13193 | 1148.233 | 12.15384 | 1148.235 |
| 1148.244 | 12.1758 | 1148.238 | 12.08    | 1148.228 | 12.14    | 1148.234 | 12.16    | 1148.236 |
| 1148.245 | 12.18   | 1148.239 | 12.08517 | 1148.228 | 12.14193 | 1148.234 | 12.16384 | 1148.237 |
| 1148.246 | 12.1858 | 1148.24  | 12.09    | 1148.229 | 12.15    | 1148.235 | 12.17    | 1148.237 |
| 1148.247 | 12.19   | 1148.24  | 12.09517 | 1148.229 | 12.15193 | 1148.236 | 12.17384 | 1148.238 |
| 1148.247 | 12.1958 | 1148.241 | 12.1     | 1148.23  | 12.16    | 1148.236 | 12.18    | 1148.239 |
| 1148.248 | 12.2    | 1148.241 | 12.10517 | 1148.23  | 12.16193 | 1148.237 | 12.18384 | 1148.239 |
| 1148.249 | 12.2058 | 1148.242 | 12.11    | 1148.231 | 12.17    | 1148.238 | 12.19    | 1148.24  |
| 1148.25  | 12.21   | 1148.243 | 12.11517 | 1148.231 | 12.17193 | 1148.238 | 12.19384 | 1148.241 |
| 1148.25  | 12.2158 | 1148.244 | 12.12    | 1148.232 | 12.18    | 1148.239 | 12.2     | 1148.241 |
| 1148.251 | 12.22   | 1148.244 | 12.12517 | 1148.232 | 12.18193 | 1148.239 | 12.20384 | 1148.242 |
| 1148.252 | 12.2258 | 1148.245 | 12.13    | 1148.233 | 12.19    | 1148.24  | 12.21    | 1148.243 |
| 1148.253 | 12.23   | 1148.246 | 12.13517 | 1148.233 | 12.19193 | 1148.241 | 12.21384 | 1148.243 |
| 1148.253 | 12.2358 | 1148.247 | 12.14    | 1148.234 | 12.2     | 1148.242 | 12.22    | 1148.244 |
| 1148.254 | 12.24   | 1148.247 | 12.14517 | 1148.234 | 12.20193 | 1148.242 | 12.22384 | 1148.245 |
| 1148.255 | 12.2458 | 1148.248 | 12.15    | 1148.235 | 12.21    | 1148.243 | 12.23    | 1148.246 |
| 1148.256 | 12.25   | 1148.249 | 12.15517 | 1148.236 | 12.21193 | 1148.243 | 12.23384 | 1148.246 |
| 1148.256 | 12.2558 | 1148.25  | 12.16    | 1148.236 | 12.22    | 1148.245 | 12.24    | 1148.247 |
| 1148.258 | 12.26   | 1148.25  | 12.16517 | 1148.237 | 12.22193 | 1148.245 | 12.24384 | 1148.248 |
| 1148.258 | 12.2658 | 1148.251 | 12.17    | 1148.237 | 12.23    | 1148.246 | 12.25    | 1148.249 |
| 1148.259 | 12.27   | 1148.252 | 12.17517 | 1148.238 | 12.23193 | 1148.246 | 12.25384 | 1148.249 |
| 1148.26  | 12.2758 | 1148.253 | 12.18    | 1148.239 | 12.24    | 1148.247 | 12.26    | 1148.25  |
| 1148.261 | 12.28   | 1148.253 | 12.18517 | 1148.239 | 12.24193 | 1148.248 | 12.26384 | 1148.251 |
| 1148.261 | 12.2858 | 1148.254 | 12.19    | 1148.24  | 12.25    | 1148.249 | 12.27    | 1148.252 |
| 1148.262 | 12.29   | 1148.255 | 12.19517 | 1148.241 | 12.25193 | 1148.249 | 12.27384 | 1148.252 |
| 1148.263 | 12.2958 | 1148.256 | 12.2     | 1148.241 | 12.26    | 1148.25  | 12.28    | 1148.253 |
| 1148.264 | 12.3    | 1148.257 | 12.20517 | 1148.242 | 12.26193 | 1148.251 | 12.28384 | 1148.254 |
| 1148.265 | 12.3058 | 1148.257 | 12.21    | 1148.243 | 12.27    | 1148.252 | 12.29    | 1148.255 |
| 1148.266 | 12.31   | 1148.258 | 12.21517 | 1148.244 | 12.27193 | 1148.252 | 12.29384 | 1148.256 |
| 1148.266 | 12.3158 | 1148.259 | 12.22    | 1148.244 | 12.28    | 1148.254 | 12.3     | 1148.257 |
| 1148.267 | 12.32   | 1148.26  | 12.22517 | 1148.245 | 12.28193 | 1148.254 | 12.30384 | 1148.257 |
| 1148.268 | 12.3258 | 1148.261 | 12.23    | 1148.246 | 12.29    | 1148.255 | 12.31    | 1148.258 |
| 1148.269 | 12.33   | 1148.261 | 12.23517 | 1148.246 | 12.29193 | 1148.255 | 12.31384 | 1148.259 |
| 1148.269 | 12.3358 | 1148.262 | 12.24    | 1148.247 | 12.3     | 1148.257 | 12.32    | 1148.26  |
| 1148.271 | 12.34   | 1148.263 | 12.24517 | 1148.248 | 12.30193 | 1148.257 | 12.32384 | 1148.26  |
| 1148.271 | 12.3458 | 1148.264 | 12.25    | 1148.249 | 12.31    | 1148.258 | 12.33    | 1148.261 |
| 1148.272 | 12.35   | 1148.265 | 12.25517 | 1148.25  | 12.31193 | 1148.259 | 12.33384 | 1148.262 |
| 1148.273 | 12.3558 | 1148.266 | 12.26    | 1148.25  | 12.32    | 1148.26  | 12.34    | 1148.263 |
| 1148.274 | 12.36   | 1148.266 | 12.26517 | 1148.251 | 12.32193 | 1148.26  | 12.34384 | 1148.264 |
| 1148.274 | 12.3658 | 1148.267 | 12.27    | 1148.252 | 12.33    | 1148.261 | 12.35    | 1148.265 |



|          |         |          |          |          |          |          |          |          |
|----------|---------|----------|----------|----------|----------|----------|----------|----------|
| 1148.275 | 12.37   | 1148.268 | 12.27517 | 1148.253 | 12.33193 | 1148.262 | 12.35384 | 1148.265 |
| 1148.276 | 12.3758 | 1148.269 | 12.28    | 1148.253 | 12.34    | 1148.263 | 12.36    | 1148.266 |
| 1148.277 | 12.38   | 1148.27  | 12.28517 | 1148.254 | 12.34193 | 1148.263 | 12.36384 | 1148.267 |
| 1148.278 | 12.3858 | 1148.27  | 12.29    | 1148.255 | 12.35    | 1148.265 | 12.37    | 1148.268 |
| 1148.279 | 12.39   | 1148.271 | 12.29517 | 1148.256 | 12.35193 | 1148.265 | 12.37384 | 1148.269 |
| 1148.279 | 12.3958 | 1148.272 | 12.3     | 1148.257 | 12.36    | 1148.266 | 12.38    | 1148.27  |
| 1148.28  | 12.4    | 1148.273 | 12.30517 | 1148.257 | 12.36193 | 1148.267 | 12.38384 | 1148.27  |
| 1148.281 | 12.4058 | 1148.274 | 12.31    | 1148.258 | 12.37    | 1148.268 | 12.39    | 1148.271 |
| 1148.282 | 12.41   | 1148.274 | 12.31517 | 1148.259 | 12.37193 | 1148.268 | 12.39384 | 1148.272 |
| 1148.283 | 12.4158 | 1148.275 | 12.32    | 1148.26  | 12.38    | 1148.27  | 12.4     | 1148.273 |
| 1148.284 | 12.42   | 1148.276 | 12.32517 | 1148.261 | 12.38193 | 1148.27  | 12.40384 | 1148.273 |
| 1148.284 | 12.4258 | 1148.277 | 12.33    | 1148.261 | 12.39    | 1148.271 | 12.41    | 1148.274 |
| 1148.285 | 12.43   | 1148.278 | 12.33517 | 1148.262 | 12.39193 | 1148.272 | 12.41384 | 1148.275 |
| 1148.286 | 12.4358 | 1148.279 | 12.34    | 1148.263 | 12.4     | 1148.273 | 12.42    | 1148.276 |
| 1148.287 | 12.44   | 1148.279 | 12.34517 | 1148.264 | 12.40193 | 1148.273 | 12.42384 | 1148.277 |
| 1148.287 | 12.4458 | 1148.28  | 12.35    | 1148.265 | 12.41    | 1148.274 | 12.43    | 1148.278 |
| 1148.288 | 12.45   | 1148.281 | 12.35517 | 1148.265 | 12.41193 | 1148.275 | 12.43384 | 1148.278 |
| 1148.289 | 12.4558 | 1148.282 | 12.36    | 1148.266 | 12.42    | 1148.276 | 12.44    | 1148.279 |
| 1148.29  | 12.46   | 1148.283 | 12.36517 | 1148.267 | 12.42193 | 1148.276 | 12.44384 | 1148.28  |
| 1148.291 | 12.4658 | 1148.284 | 12.37    | 1148.268 | 12.43    | 1148.278 | 12.45    | 1148.281 |
| 1148.292 | 12.47   | 1148.284 | 12.37517 | 1148.269 | 12.43193 | 1148.278 | 12.45384 | 1148.282 |
| 1148.292 | 12.4758 | 1148.285 | 12.38    | 1148.27  | 12.44    | 1148.279 | 12.46    | 1148.283 |
| 1148.293 | 12.48   | 1148.286 | 12.38517 | 1148.27  | 12.44193 | 1148.28  | 12.46384 | 1148.283 |
| 1148.294 | 12.4858 | 1148.287 | 12.39    | 1148.271 | 12.45    | 1148.281 | 12.47    | 1148.284 |
| 1148.295 | 12.49   | 1148.287 | 12.39517 | 1148.272 | 12.45193 | 1148.281 | 12.47384 | 1148.285 |
| 1148.295 | 12.4958 | 1148.288 | 12.4     | 1148.273 | 12.46    | 1148.283 | 12.48    | 1148.286 |
| 1148.296 | 12.5    | 1148.289 | 12.40517 | 1148.274 | 12.46193 | 1148.283 | 12.48384 | 1148.286 |
| 1148.297 | 12.5058 | 1148.29  | 12.41    | 1148.274 | 12.47    | 1148.284 | 12.49    | 1148.287 |
| 1148.298 | 12.51   | 1148.291 | 12.41517 | 1148.275 | 12.47193 | 1148.284 | 12.49384 | 1148.288 |
| 1148.298 | 12.5158 | 1148.291 | 12.42    | 1148.276 | 12.48    | 1148.286 | 12.5     | 1148.289 |
| 1148.299 | 12.52   | 1148.292 | 12.42517 | 1148.277 | 12.48193 | 1148.286 | 12.50384 | 1148.29  |
| 1148.3   | 12.5258 | 1148.293 | 12.43    | 1148.278 | 12.49    | 1148.287 | 12.51    | 1148.291 |
| 1148.301 | 12.53   | 1148.294 | 12.43517 | 1148.279 | 12.49193 | 1148.288 | 12.51384 | 1148.291 |
| 1148.301 | 12.5358 | 1148.295 | 12.44    | 1148.279 | 12.5     | 1148.289 | 12.52    | 1148.292 |
| 1148.302 | 12.54   | 1148.295 | 12.44517 | 1148.28  | 12.50193 | 1148.289 | 12.52384 | 1148.293 |
| 1148.303 | 12.5458 | 1148.296 | 12.45    | 1148.281 | 12.51    | 1148.29  | 12.53    | 1148.294 |
| 1148.304 | 12.55   | 1148.297 | 12.45517 | 1148.282 | 12.51193 | 1148.291 | 12.53384 | 1148.294 |
| 1148.304 | 12.5558 | 1148.298 | 12.46    | 1148.283 | 12.52    | 1148.292 | 12.54    | 1148.295 |
| 1148.305 | 12.56   | 1148.298 | 12.46517 | 1148.283 | 12.52193 | 1148.292 | 12.54384 | 1148.296 |
| 1148.306 | 12.5658 | 1148.299 | 12.47    | 1148.284 | 12.53    | 1148.294 | 12.55    | 1148.297 |
| 1148.307 | 12.57   | 1148.3   | 12.47517 | 1148.285 | 12.53193 | 1148.294 | 12.55384 | 1148.297 |
| 1148.307 | 12.5758 | 1148.301 | 12.48    | 1148.286 | 12.54    | 1148.295 | 12.56    | 1148.298 |
| 1148.308 | 12.58   | 1148.301 | 12.48517 | 1148.287 | 12.54193 | 1148.295 | 12.56384 | 1148.299 |
| 1148.309 | 12.5858 | 1148.302 | 12.49    | 1148.287 | 12.55    | 1148.297 | 12.57    | 1148.3   |
| 1148.31  | 12.59   | 1148.303 | 12.49517 | 1148.288 | 12.55193 | 1148.297 | 12.57384 | 1148.3   |
| 1148.31  | 12.5958 | 1148.304 | 12.5     | 1148.289 | 12.56    | 1148.298 | 12.58    | 1148.301 |
| 1148.311 | 12.6    | 1148.304 | 12.50517 | 1148.29  | 12.56193 | 1148.298 | 12.58384 | 1148.302 |

|          |         |          |          |          |          |          |          |          |
|----------|---------|----------|----------|----------|----------|----------|----------|----------|
| 1148.311 | 12.6058 | 1148.305 | 12.51    | 1148.291 | 12.57    | 1148.3   | 12.59    | 1148.303 |
| 1148.312 | 12.61   | 1148.306 | 12.51517 | 1148.291 | 12.57193 | 1148.3   | 12.59384 | 1148.303 |
| 1148.313 | 12.6158 | 1148.307 | 12.52    | 1148.292 | 12.58    | 1148.301 | 12.6     | 1148.304 |
| 1148.314 | 12.62   | 1148.307 | 12.52517 | 1148.293 | 12.58193 | 1148.301 | 12.60384 | 1148.305 |
| 1148.314 | 12.6258 | 1148.308 | 12.53    | 1148.294 | 12.59    | 1148.303 | 12.61    | 1148.306 |
| 1148.315 | 12.63   | 1148.309 | 12.53517 | 1148.295 | 12.59193 | 1148.303 | 12.61384 | 1148.306 |
| 1148.316 | 12.6358 | 1148.309 | 12.54    | 1148.295 | 12.6     | 1148.304 | 12.62    | 1148.307 |
| 1148.316 | 12.64   | 1148.31  | 12.54517 | 1148.296 | 12.60193 | 1148.304 | 12.62384 | 1148.308 |
| 1148.317 | 12.6458 | 1148.311 | 12.55    | 1148.297 | 12.61    | 1148.306 | 12.63    | 1148.309 |
| 1148.318 | 12.65   | 1148.311 | 12.55517 | 1148.298 | 12.61193 | 1148.306 | 12.63384 | 1148.309 |
| 1148.318 | 12.6558 | 1148.312 | 12.56    | 1148.298 | 12.62    | 1148.307 | 12.64    | 1148.31  |
| 1148.319 | 12.66   | 1148.313 | 12.56517 | 1148.299 | 12.62193 | 1148.307 | 12.64384 | 1148.311 |
| 1148.32  | 12.6658 | 1148.314 | 12.57    | 1148.3   | 12.63    | 1148.308 | 12.65    | 1148.311 |
| 1148.32  | 12.67   | 1148.314 | 12.57517 | 1148.301 | 12.63193 | 1148.309 | 12.65384 | 1148.312 |
| 1148.321 | 12.6758 | 1148.315 | 12.58    | 1148.301 | 12.64    | 1148.31  | 12.66    | 1148.313 |
| 1148.322 | 12.68   | 1148.316 | 12.58517 | 1148.302 | 12.64193 | 1148.31  | 12.66384 | 1148.313 |
| 1148.322 | 12.6858 | 1148.316 | 12.59    | 1148.303 | 12.65    | 1148.311 | 12.67    | 1148.314 |
| 1148.323 | 12.69   | 1148.317 | 12.59517 | 1148.304 | 12.65193 | 1148.312 | 12.67384 | 1148.315 |
| 1148.324 | 12.6958 | 1148.318 | 12.6     | 1148.304 | 12.66    | 1148.313 | 12.68    | 1148.316 |
| 1148.324 | 12.7    | 1148.318 | 12.60517 | 1148.305 | 12.66193 | 1148.313 | 12.68384 | 1148.316 |
| 1148.325 | 12.7058 | 1148.319 | 12.61    | 1148.306 | 12.67    | 1148.314 | 12.69    | 1148.317 |
| 1148.326 | 12.71   | 1148.32  | 12.61517 | 1148.307 | 12.67193 | 1148.314 | 12.69384 | 1148.317 |
| 1148.326 | 12.7158 | 1148.32  | 12.62    | 1148.307 | 12.68    | 1148.315 | 12.7     | 1148.318 |
| 1148.327 | 12.72   | 1148.321 | 12.62517 | 1148.308 | 12.68193 | 1148.316 | 12.70384 | 1148.319 |
| 1148.327 | 12.7258 | 1148.322 | 12.63    | 1148.309 | 12.69    | 1148.317 | 12.71    | 1148.32  |
| 1148.328 | 12.73   | 1148.322 | 12.63517 | 1148.309 | 12.69193 | 1148.317 | 12.71384 | 1148.32  |
| 1148.328 | 12.7358 | 1148.323 | 12.64    | 1148.31  | 12.7     | 1148.318 | 12.72    | 1148.321 |
| 1148.329 | 12.74   | 1148.323 | 12.64517 | 1148.311 | 12.70193 | 1148.318 | 12.72384 | 1148.321 |
| 1148.33  | 12.7458 | 1148.324 | 12.65    | 1148.311 | 12.71    | 1148.319 | 12.73    | 1148.322 |
| 1148.33  | 12.75   | 1148.325 | 12.65517 | 1148.312 | 12.71193 | 1148.32  | 12.73384 | 1148.323 |
| 1148.331 | 12.7558 | 1148.325 | 12.66    | 1148.313 | 12.72    | 1148.321 | 12.74    | 1148.323 |
| 1148.332 | 12.76   | 1148.326 | 12.66517 | 1148.314 | 12.72193 | 1148.321 | 12.74384 | 1148.324 |
| 1148.332 | 12.7658 | 1148.327 | 12.67    | 1148.314 | 12.73    | 1148.322 | 12.75    | 1148.325 |
| 1148.333 | 12.77   | 1148.327 | 12.67517 | 1148.315 | 12.73193 | 1148.322 | 12.75384 | 1148.325 |
| 1148.333 | 12.7758 | 1148.328 | 12.68    | 1148.316 | 12.74    | 1148.323 | 12.76    | 1148.326 |
| 1148.334 | 12.78   | 1148.328 | 12.68517 | 1148.316 | 12.74193 | 1148.323 | 12.76384 | 1148.326 |
| 1148.334 | 12.7858 | 1148.329 | 12.69    | 1148.317 | 12.75    | 1148.324 | 12.77    | 1148.327 |
| 1148.335 | 12.79   | 1148.33  | 12.69517 | 1148.318 | 12.75193 | 1148.325 | 12.77384 | 1148.328 |
| 1148.335 | 12.7958 | 1148.33  | 12.7     | 1148.318 | 12.76    | 1148.326 | 12.78    | 1148.328 |
| 1148.336 | 12.8    | 1148.331 | 12.70517 | 1148.319 | 12.76193 | 1148.326 | 12.78384 | 1148.329 |
| 1148.337 | 12.8058 | 1148.332 | 12.71    | 1148.32  | 12.77    | 1148.327 | 12.79    | 1148.33  |
| 1148.337 | 12.81   | 1148.332 | 12.71517 | 1148.32  | 12.77193 | 1148.327 | 12.79384 | 1148.33  |
| 1148.338 | 12.8158 | 1148.333 | 12.72    | 1148.321 | 12.78    | 1148.328 | 12.8     | 1148.331 |
| 1148.338 | 12.82   | 1148.333 | 12.72517 | 1148.322 | 12.78193 | 1148.328 | 12.80384 | 1148.331 |
| 1148.339 | 12.8258 | 1148.334 | 12.73    | 1148.322 | 12.79    | 1148.329 | 12.81    | 1148.332 |
| 1148.339 | 12.83   | 1148.334 | 12.73517 | 1148.323 | 12.79193 | 1148.33  | 12.81384 | 1148.332 |
| 1148.34  | 12.8358 | 1148.335 | 12.74    | 1148.323 | 12.8     | 1148.331 | 12.82    | 1148.333 |

|          |         |          |          |          |          |          |          |          |
|----------|---------|----------|----------|----------|----------|----------|----------|----------|
| 1148.34  | 12.84   | 1148.335 | 12.74517 | 1148.324 | 12.80193 | 1148.331 | 12.82384 | 1148.334 |
| 1148.341 | 12.8458 | 1148.336 | 12.75    | 1148.325 | 12.81    | 1148.332 | 12.83    | 1148.334 |
| 1148.342 | 12.85   | 1148.337 | 12.75517 | 1148.325 | 12.81193 | 1148.332 | 12.83384 | 1148.335 |
| 1148.342 | 12.8558 | 1148.337 | 12.76    | 1148.326 | 12.82    | 1148.333 | 12.84    | 1148.335 |
| 1148.343 | 12.86   | 1148.338 | 12.76517 | 1148.327 | 12.82193 | 1148.333 | 12.84384 | 1148.336 |
| 1148.343 | 12.8658 | 1148.338 | 12.77    | 1148.327 | 12.83    | 1148.334 | 12.85    | 1148.336 |
| 1148.344 | 12.87   | 1148.339 | 12.77517 | 1148.328 | 12.83193 | 1148.334 | 12.85384 | 1148.337 |
| 1148.344 | 12.8758 | 1148.339 | 12.78    | 1148.328 | 12.84    | 1148.335 | 12.86    | 1148.338 |
| 1148.345 | 12.88   | 1148.34  | 12.78517 | 1148.329 | 12.84193 | 1148.335 | 12.86384 | 1148.338 |
| 1148.345 | 12.8858 | 1148.34  | 12.79    | 1148.33  | 12.85    | 1148.336 | 12.87    | 1148.339 |
| 1148.346 | 12.89   | 1148.341 | 12.79517 | 1148.33  | 12.85193 | 1148.336 | 12.87384 | 1148.339 |
| 1148.346 | 12.8958 | 1148.341 | 12.8     | 1148.331 | 12.86    | 1148.337 | 12.88    | 1148.34  |
| 1148.347 | 12.9    | 1148.342 | 12.80517 | 1148.331 | 12.86193 | 1148.338 | 12.88384 | 1148.34  |
| 1148.347 | 12.9058 | 1148.342 | 12.81    | 1148.332 | 12.87    | 1148.338 | 12.89    | 1148.341 |
| 1148.347 | 12.91   | 1148.343 | 12.81517 | 1148.333 | 12.87193 | 1148.339 | 12.89384 | 1148.341 |
| 1148.348 | 12.9158 | 1148.343 | 12.82    | 1148.333 | 12.88    | 1148.339 | 12.9     | 1148.342 |
| 1148.348 | 12.92   | 1148.344 | 12.82517 | 1148.334 | 12.88193 | 1148.34  | 12.90384 | 1148.342 |
| 1148.349 | 12.9258 | 1148.344 | 12.83    | 1148.334 | 12.89    | 1148.341 | 12.91    | 1148.343 |
| 1148.349 | 12.93   | 1148.345 | 12.83517 | 1148.335 | 12.89193 | 1148.341 | 12.91384 | 1148.343 |
| 1148.35  | 12.9358 | 1148.345 | 12.84    | 1148.335 | 12.9     | 1148.342 | 12.92    | 1148.344 |
| 1148.35  | 12.94   | 1148.346 | 12.84517 | 1148.336 | 12.90193 | 1148.342 | 12.92384 | 1148.344 |
| 1148.351 | 12.9458 | 1148.346 | 12.85    | 1148.337 | 12.91    | 1148.343 | 12.93    | 1148.345 |
| 1148.351 | 12.95   | 1148.347 | 12.85517 | 1148.337 | 12.91193 | 1148.343 | 12.93384 | 1148.345 |
| 1148.351 | 12.9558 | 1148.347 | 12.86    | 1148.338 | 12.92    | 1148.344 | 12.94    | 1148.346 |
| 1148.352 | 12.96   | 1148.348 | 12.86517 | 1148.338 | 12.92193 | 1148.344 | 12.94384 | 1148.346 |
| 1148.352 | 12.9658 | 1148.348 | 12.87    | 1148.339 | 12.93    | 1148.345 | 12.95    | 1148.347 |
| 1148.353 | 12.97   | 1148.349 | 12.87517 | 1148.339 | 12.93193 | 1148.345 | 12.95384 | 1148.347 |
| 1148.353 | 12.9758 | 1148.349 | 12.88    | 1148.34  | 12.94    | 1148.346 | 12.96    | 1148.348 |
| 1148.354 | 12.98   | 1148.35  | 12.88517 | 1148.34  | 12.94193 | 1148.346 | 12.96384 | 1148.348 |
| 1148.354 | 12.9858 | 1148.35  | 12.89    | 1148.341 | 12.95    | 1148.347 | 12.97    | 1148.349 |
| 1148.355 | 12.99   | 1148.351 | 12.89517 | 1148.341 | 12.95193 | 1148.347 | 12.97384 | 1148.349 |
| 1148.355 | 12.9958 | 1148.351 | 12.9     | 1148.342 | 12.96    | 1148.347 | 12.98    | 1148.35  |
| 1148.355 | 13      | 1148.351 | 12.90517 | 1148.342 | 12.96193 | 1148.348 | 12.98384 | 1148.35  |
| 1148.356 | 13.0058 | 1148.352 | 12.91    | 1148.343 | 12.97    | 1148.348 | 12.99    | 1148.35  |
| 1148.356 | 13.01   | 1148.352 | 12.91517 | 1148.343 | 12.97193 | 1148.349 | 12.99384 | 1148.351 |
| 1148.357 | 13.0158 | 1148.353 | 12.92    | 1148.344 | 12.98    | 1148.349 | 13       | 1148.351 |
| 1148.357 | 13.02   | 1148.353 | 12.92517 | 1148.344 | 12.98193 | 1148.35  | 13.00384 | 1148.352 |
| 1148.357 | 13.0258 | 1148.354 | 12.93    | 1148.345 | 12.99    | 1148.35  | 13.01    | 1148.352 |
| 1148.358 | 13.03   | 1148.354 | 12.93517 | 1148.345 | 12.99193 | 1148.35  | 13.01384 | 1148.353 |
| 1148.358 | 13.0358 | 1148.355 | 12.94    | 1148.346 | 13       | 1148.351 | 13.02    | 1148.353 |
| 1148.359 | 13.04   | 1148.355 | 12.94517 | 1148.346 | 13.00193 | 1148.351 | 13.02384 | 1148.353 |
| 1148.359 | 13.0458 | 1148.355 | 12.95    | 1148.347 | 13.01    | 1148.352 | 13.03    | 1148.354 |
| 1148.359 | 13.05   | 1148.356 | 12.95517 | 1148.347 | 13.01193 | 1148.352 | 13.03384 | 1148.354 |
| 1148.36  | 13.0558 | 1148.356 | 12.96    | 1148.348 | 13.02    | 1148.353 | 13.04    | 1148.355 |
| 1148.36  | 13.06   | 1148.357 | 12.96517 | 1148.348 | 13.02193 | 1148.353 | 13.04384 | 1148.355 |
| 1148.36  | 13.0658 | 1148.357 | 12.97    | 1148.349 | 13.03    | 1148.354 | 13.05    | 1148.356 |
| 1148.361 | 13.07   | 1148.357 | 12.97517 | 1148.349 | 13.03193 | 1148.354 | 13.05384 | 1148.356 |

|          |         |          |          |          |          |          |          |          |
|----------|---------|----------|----------|----------|----------|----------|----------|----------|
| 1148.361 | 13.0758 | 1148.358 | 12.98    | 1148.35  | 13.04    | 1148.355 | 13.06    | 1148.356 |
| 1148.362 | 13.08   | 1148.358 | 12.98517 | 1148.35  | 13.04193 | 1148.355 | 13.06384 | 1148.357 |
| 1148.362 | 13.0858 | 1148.359 | 12.99    | 1148.351 | 13.05    | 1148.355 | 13.07    | 1148.357 |
| 1148.362 | 13.09   | 1148.359 | 12.99517 | 1148.351 | 13.05193 | 1148.356 | 13.07384 | 1148.358 |
| 1148.363 | 13.0958 | 1148.359 | 13       | 1148.351 | 13.06    | 1148.356 | 13.08    | 1148.358 |
| 1148.363 | 13.1    | 1148.36  | 13.00517 | 1148.352 | 13.06193 | 1148.356 | 13.08384 | 1148.358 |
| 1148.363 | 13.1058 | 1148.36  | 13.01    | 1148.352 | 13.07    | 1148.357 | 13.09    | 1148.359 |
| 1148.364 | 13.11   | 1148.36  | 13.01517 | 1148.353 | 13.07193 | 1148.357 | 13.09384 | 1148.359 |
| 1148.364 | 13.1158 | 1148.361 | 13.02    | 1148.353 | 13.08    | 1148.358 | 13.1     | 1148.36  |
| 1148.365 | 13.12   | 1148.361 | 13.02517 | 1148.354 | 13.08193 | 1148.358 | 13.10384 | 1148.36  |
| 1148.365 | 13.1258 | 1148.362 | 13.03    | 1148.354 | 13.09    | 1148.359 | 13.11    | 1148.36  |
| 1148.365 | 13.13   | 1148.362 | 13.03517 | 1148.354 | 13.09193 | 1148.359 | 13.11384 | 1148.361 |
| 1148.365 | 13.1358 | 1148.362 | 13.04    | 1148.355 | 13.1     | 1148.359 | 13.12    | 1148.361 |
| 1148.366 | 13.14   | 1148.363 | 13.04517 | 1148.355 | 13.10193 | 1148.36  | 13.12384 | 1148.361 |
| 1148.366 | 13.1458 | 1148.363 | 13.05    | 1148.356 | 13.11    | 1148.36  | 13.13    | 1148.362 |
| 1148.367 | 13.15   | 1148.363 | 13.05517 | 1148.356 | 13.11193 | 1148.36  | 13.13384 | 1148.362 |
| 1148.367 | 13.1558 | 1148.364 | 13.06    | 1148.357 | 13.12    | 1148.361 | 13.14    | 1148.363 |
| 1148.367 | 13.16   | 1148.364 | 13.06517 | 1148.357 | 13.12193 | 1148.361 | 13.14384 | 1148.363 |
| 1148.367 | 13.1658 | 1148.364 | 13.07    | 1148.357 | 13.13    | 1148.362 | 13.15    | 1148.363 |
| 1148.368 | 13.17   | 1148.365 | 13.07517 | 1148.358 | 13.13193 | 1148.362 | 13.15384 | 1148.364 |
| 1148.368 | 13.1758 | 1148.365 | 13.08    | 1148.358 | 13.14    | 1148.362 | 13.16    | 1148.364 |
| 1148.368 | 13.18   | 1148.365 | 13.08517 | 1148.359 | 13.14193 | 1148.362 | 13.16384 | 1148.364 |
| 1148.369 | 13.1858 | 1148.366 | 13.09    | 1148.359 | 13.15    | 1148.363 | 13.17    | 1148.365 |
| 1148.369 | 13.19   | 1148.366 | 13.09517 | 1148.359 | 13.15193 | 1148.363 | 13.17384 | 1148.365 |
| 1148.369 | 13.1958 | 1148.366 | 13.1     | 1148.36  | 13.16    | 1148.364 | 13.18    | 1148.365 |
| 1148.37  | 13.2    | 1148.367 | 13.10517 | 1148.36  | 13.16193 | 1148.364 | 13.18384 | 1148.366 |
| 1148.37  | 13.2058 | 1148.367 | 13.11    | 1148.36  | 13.17    | 1148.364 | 13.19    | 1148.366 |
| 1148.37  | 13.21   | 1148.367 | 13.11517 | 1148.361 | 13.17193 | 1148.365 | 13.19384 | 1148.366 |
| 1148.37  | 13.2158 | 1148.368 | 13.12    | 1148.361 | 13.18    | 1148.365 | 13.2     | 1148.367 |
| 1148.371 | 13.22   | 1148.368 | 13.12517 | 1148.362 | 13.18193 | 1148.365 | 13.20384 | 1148.367 |
| 1148.371 | 13.2258 | 1148.368 | 13.13    | 1148.362 | 13.19    | 1148.366 | 13.21    | 1148.367 |
| 1148.371 | 13.23   | 1148.369 | 13.13517 | 1148.362 | 13.19193 | 1148.366 | 13.21384 | 1148.368 |
| 1148.372 | 13.2358 | 1148.369 | 13.14    | 1148.363 | 13.2     | 1148.366 | 13.22    | 1148.368 |
| 1148.372 | 13.24   | 1148.369 | 13.14517 | 1148.363 | 13.20193 | 1148.367 | 13.22384 | 1148.368 |
| 1148.372 | 13.2458 | 1148.37  | 13.15    | 1148.363 | 13.21    | 1148.367 | 13.23    | 1148.369 |
| 1148.373 | 13.25   | 1148.37  | 13.15517 | 1148.364 | 13.21193 | 1148.367 | 13.23384 | 1148.369 |
| 1148.373 | 13.2558 | 1148.37  | 13.16    | 1148.364 | 13.22    | 1148.368 | 13.24    | 1148.369 |
| 1148.373 | 13.26   | 1148.37  | 13.16517 | 1148.364 | 13.22193 | 1148.368 | 13.24384 | 1148.369 |
| 1148.373 | 13.2658 | 1148.371 | 13.17    | 1148.365 | 13.23    | 1148.368 | 13.25    | 1148.37  |
| 1148.374 | 13.27   | 1148.371 | 13.17517 | 1148.365 | 13.23193 | 1148.368 | 13.25384 | 1148.37  |
| 1148.374 | 13.2758 | 1148.371 | 13.18    | 1148.365 | 13.24    | 1148.369 | 13.26    | 1148.37  |
| 1148.374 | 13.28   | 1148.372 | 13.18517 | 1148.366 | 13.24193 | 1148.369 | 13.26384 | 1148.371 |
| 1148.374 | 13.2858 | 1148.372 | 13.19    | 1148.366 | 13.25    | 1148.37  | 13.27    | 1148.371 |
| 1148.375 | 13.29   | 1148.372 | 13.19517 | 1148.366 | 13.25193 | 1148.37  | 13.27384 | 1148.371 |
| 1148.375 | 13.2958 | 1148.372 | 13.2     | 1148.367 | 13.26    | 1148.37  | 13.28    | 1148.372 |
| 1148.375 | 13.3    | 1148.373 | 13.20517 | 1148.367 | 13.26193 | 1148.37  | 13.28384 | 1148.372 |
| 1148.375 | 13.3058 | 1148.373 | 13.21    | 1148.367 | 13.27    | 1148.371 | 13.29    | 1148.372 |

|          |         |          |          |          |          |          |          |          |
|----------|---------|----------|----------|----------|----------|----------|----------|----------|
| 1148.376 | 13.31   | 1148.373 | 13.21517 | 1148.368 | 13.27193 | 1148.371 | 13.29384 | 1148.372 |
| 1148.376 | 13.3158 | 1148.374 | 13.22    | 1148.368 | 13.28    | 1148.371 | 13.3     | 1148.373 |
| 1148.376 | 13.32   | 1148.374 | 13.22517 | 1148.368 | 13.28193 | 1148.371 | 13.30384 | 1148.373 |
| 1148.376 | 13.3258 | 1148.374 | 13.23    | 1148.369 | 13.29    | 1148.372 | 13.31    | 1148.373 |
| 1148.377 | 13.33   | 1148.374 | 13.23517 | 1148.369 | 13.29193 | 1148.372 | 13.31384 | 1148.373 |
| 1148.377 | 13.3358 | 1148.375 | 13.24    | 1148.369 | 13.3     | 1148.372 | 13.32    | 1148.374 |
| 1148.377 | 13.34   | 1148.375 | 13.24517 | 1148.37  | 13.30193 | 1148.373 | 13.32384 | 1148.374 |
| 1148.377 | 13.3458 | 1148.375 | 13.25    | 1148.37  | 13.31    | 1148.373 | 13.33    | 1148.374 |
| 1148.378 | 13.35   | 1148.375 | 13.25517 | 1148.37  | 13.31193 | 1148.373 | 13.33384 | 1148.374 |
| 1148.378 | 13.3558 | 1148.376 | 13.26    | 1148.37  | 13.32    | 1148.374 | 13.34    | 1148.375 |
| 1148.378 | 13.36   | 1148.376 | 13.26517 | 1148.371 | 13.32193 | 1148.374 | 13.34384 | 1148.375 |
| 1148.378 | 13.3658 | 1148.376 | 13.27    | 1148.371 | 13.33    | 1148.374 | 13.35    | 1148.375 |
| 1148.379 | 13.37   | 1148.376 | 13.27517 | 1148.371 | 13.33193 | 1148.374 | 13.35384 | 1148.375 |
| 1148.379 | 13.3758 | 1148.377 | 13.28    | 1148.372 | 13.34    | 1148.375 | 13.36    | 1148.376 |
| 1148.379 | 13.38   | 1148.377 | 13.28517 | 1148.372 | 13.34193 | 1148.375 | 13.36384 | 1148.376 |
| 1148.379 | 13.3858 | 1148.377 | 13.29    | 1148.372 | 13.35    | 1148.375 | 13.37    | 1148.376 |
| 1148.379 | 13.39   | 1148.377 | 13.29517 | 1148.372 | 13.35193 | 1148.375 | 13.37384 | 1148.376 |
| 1148.38  | 13.3958 | 1148.378 | 13.3     | 1148.373 | 13.36    | 1148.376 | 13.38    | 1148.377 |
| 1148.38  | 13.4    | 1148.378 | 13.30517 | 1148.373 | 13.36193 | 1148.376 | 13.38384 | 1148.377 |
| 1148.38  | 13.4058 | 1148.378 | 13.31    | 1148.373 | 13.37    | 1148.376 | 13.39    | 1148.377 |
| 1148.38  | 13.41   | 1148.378 | 13.31517 | 1148.374 | 13.37193 | 1148.376 | 13.39384 | 1148.377 |
| 1148.38  | 13.4158 | 1148.378 | 13.32    | 1148.374 | 13.38    | 1148.377 | 13.4     | 1148.378 |
| 1148.381 | 13.42   | 1148.379 | 13.32517 | 1148.374 | 13.38193 | 1148.377 | 13.40384 | 1148.378 |
| 1148.381 | 13.4258 | 1148.379 | 13.33    | 1148.374 | 13.39    | 1148.377 | 13.41    | 1148.378 |
| 1148.381 | 13.43   | 1148.379 | 13.33517 | 1148.375 | 13.39193 | 1148.377 | 13.41384 | 1148.378 |
| 1148.381 | 13.4358 | 1148.379 | 13.34    | 1148.375 | 13.4     | 1148.378 | 13.42    | 1148.379 |
| 1148.381 | 13.44   | 1148.38  | 13.34517 | 1148.375 | 13.40193 | 1148.378 | 13.42384 | 1148.379 |
| 1148.382 | 13.4458 | 1148.38  | 13.35    | 1148.375 | 13.41    | 1148.378 | 13.43    | 1148.379 |
| 1148.382 | 13.45   | 1148.38  | 13.35517 | 1148.376 | 13.41193 | 1148.378 | 13.43384 | 1148.379 |
| 1148.382 | 13.4558 | 1148.38  | 13.36    | 1148.376 | 13.42    | 1148.378 | 13.44    | 1148.379 |
| 1148.382 | 13.46   | 1148.38  | 13.36517 | 1148.376 | 13.42193 | 1148.379 | 13.44384 | 1148.38  |
| 1148.382 | 13.4658 | 1148.381 | 13.37    | 1148.376 | 13.43    | 1148.379 | 13.45    | 1148.38  |
| 1148.383 | 13.47   | 1148.381 | 13.37517 | 1148.377 | 13.43193 | 1148.379 | 13.45384 | 1148.38  |
| 1148.383 | 13.4758 | 1148.381 | 13.38    | 1148.377 | 13.44    | 1148.379 | 13.46    | 1148.38  |
| 1148.383 | 13.48   | 1148.381 | 13.38517 | 1148.377 | 13.44193 | 1148.379 | 13.46384 | 1148.38  |
| 1148.383 | 13.4858 | 1148.381 | 13.39    | 1148.377 | 13.45    | 1148.38  | 13.47    | 1148.381 |
| 1148.383 | 13.49   | 1148.382 | 13.39517 | 1148.378 | 13.45193 | 1148.38  | 13.47384 | 1148.381 |
| 1148.384 | 13.4958 | 1148.382 | 13.4     | 1148.378 | 13.46    | 1148.38  | 13.48    | 1148.381 |
| 1148.384 | 13.5    | 1148.382 | 13.40517 | 1148.378 | 13.46193 | 1148.38  | 13.48384 | 1148.381 |
| 1148.384 | 13.5058 | 1148.382 | 13.41    | 1148.378 | 13.47    | 1148.381 | 13.49    | 1148.382 |
| 1148.384 | 13.51   | 1148.382 | 13.41517 | 1148.378 | 13.47193 | 1148.381 | 13.49384 | 1148.382 |
| 1148.384 | 13.5158 | 1148.383 | 13.42    | 1148.379 | 13.48    | 1148.381 | 13.5     | 1148.382 |
| 1148.384 | 13.52   | 1148.383 | 13.42517 | 1148.379 | 13.48193 | 1148.381 | 13.50384 | 1148.382 |
| 1148.385 | 13.5258 | 1148.383 | 13.43    | 1148.379 | 13.49    | 1148.381 | 13.51    | 1148.382 |
| 1148.385 | 13.53   | 1148.383 | 13.43517 | 1148.379 | 13.49193 | 1148.381 | 13.51384 | 1148.382 |
| 1148.385 | 13.5358 | 1148.383 | 13.44    | 1148.38  | 13.5     | 1148.382 | 13.52    | 1148.383 |
| 1148.385 | 13.54   | 1148.383 | 13.44517 | 1148.38  | 13.50193 | 1148.382 | 13.52384 | 1148.383 |

|          |         |          |          |          |          |          |          |          |
|----------|---------|----------|----------|----------|----------|----------|----------|----------|
| 1148.385 | 13.5458 | 1148.384 | 13.45    | 1148.38  | 13.51    | 1148.382 | 13.53    | 1148.383 |
| 1148.385 | 13.55   | 1148.384 | 13.45517 | 1148.38  | 13.51193 | 1148.382 | 13.53384 | 1148.383 |
| 1148.386 | 13.5558 | 1148.384 | 13.46    | 1148.38  | 13.52    | 1148.383 | 13.54    | 1148.383 |
| 1148.386 | 13.56   | 1148.384 | 13.46517 | 1148.381 | 13.52193 | 1148.383 | 13.54384 | 1148.384 |
| 1148.386 | 13.5658 | 1148.384 | 13.47    | 1148.381 | 13.53    | 1148.383 | 13.55    | 1148.384 |
| 1148.386 | 13.57   | 1148.385 | 13.47517 | 1148.381 | 13.53193 | 1148.383 | 13.55384 | 1148.384 |
| 1148.386 | 13.5758 | 1148.385 | 13.48    | 1148.381 | 13.54    | 1148.383 | 13.56    | 1148.384 |
| 1148.386 | 13.58   | 1148.385 | 13.48517 | 1148.381 | 13.54193 | 1148.383 | 13.56384 | 1148.384 |
| 1148.387 | 13.5858 | 1148.385 | 13.49    | 1148.382 | 13.55    | 1148.384 | 13.57    | 1148.384 |
| 1148.387 | 13.59   | 1148.385 | 13.49517 | 1148.382 | 13.55193 | 1148.384 | 13.57384 | 1148.385 |
| 1148.387 | 13.5958 | 1148.385 | 13.5     | 1148.382 | 13.56    | 1148.384 | 13.58    | 1148.385 |
| 1148.387 | 13.6    | 1148.386 | 13.50517 | 1148.382 | 13.56193 | 1148.384 | 13.58384 | 1148.385 |
| 1148.387 | 13.6058 | 1148.386 | 13.51    | 1148.382 | 13.57    | 1148.384 | 13.59    | 1148.385 |
| 1148.387 | 13.61   | 1148.386 | 13.51517 | 1148.383 | 13.57193 | 1148.384 | 13.59384 | 1148.385 |
| 1148.387 | 13.6158 | 1148.386 | 13.52    | 1148.383 | 13.58    | 1148.385 | 13.6     | 1148.385 |
| 1148.388 | 13.62   | 1148.386 | 13.52517 | 1148.383 | 13.58193 | 1148.385 | 13.60384 | 1148.386 |
| 1148.388 | 13.6258 | 1148.386 | 13.53    | 1148.383 | 13.59    | 1148.385 | 13.61    | 1148.386 |
| 1148.388 | 13.63   | 1148.386 | 13.53517 | 1148.383 | 13.59193 | 1148.385 | 13.61384 | 1148.386 |
| 1148.388 | 13.6358 | 1148.387 | 13.54    | 1148.383 | 13.6     | 1148.385 | 13.62    | 1148.386 |
| 1148.388 | 13.64   | 1148.387 | 13.54517 | 1148.384 | 13.60193 | 1148.385 | 13.62384 | 1148.386 |
| 1148.388 | 13.6458 | 1148.387 | 13.55    | 1148.384 | 13.61    | 1148.386 | 13.63    | 1148.386 |
| 1148.388 | 13.65   | 1148.387 | 13.55517 | 1148.384 | 13.61193 | 1148.386 | 13.63384 | 1148.387 |
| 1148.389 | 13.6558 | 1148.387 | 13.56    | 1148.384 | 13.62    | 1148.386 | 13.64    | 1148.387 |
| 1148.389 | 13.66   | 1148.387 | 13.56517 | 1148.384 | 13.62193 | 1148.386 | 13.64384 | 1148.387 |
| 1148.389 | 13.6658 | 1148.388 | 13.57    | 1148.385 | 13.63    | 1148.386 | 13.65    | 1148.387 |
| 1148.389 | 13.67   | 1148.388 | 13.57517 | 1148.385 | 13.63193 | 1148.386 | 13.65384 | 1148.387 |
| 1148.389 | 13.6758 | 1148.388 | 13.58    | 1148.385 | 13.64    | 1148.387 | 13.66    | 1148.387 |
| 1148.389 | 13.68   | 1148.388 | 13.58517 | 1148.385 | 13.64193 | 1148.387 | 13.66384 | 1148.387 |
| 1148.389 | 13.6858 | 1148.388 | 13.59    | 1148.385 | 13.65    | 1148.387 | 13.67    | 1148.388 |
| 1148.389 | 13.69   | 1148.388 | 13.59517 | 1148.385 | 13.65193 | 1148.387 | 13.67384 | 1148.388 |
| 1148.39  | 13.6958 | 1148.388 | 13.6     | 1148.386 | 13.66    | 1148.387 | 13.68    | 1148.388 |
| 1148.39  | 13.7    | 1148.389 | 13.60517 | 1148.386 | 13.66193 | 1148.387 | 13.68384 | 1148.388 |
| 1148.39  | 13.7058 | 1148.389 | 13.61    | 1148.386 | 13.67    | 1148.387 | 13.69    | 1148.388 |
| 1148.39  | 13.71   | 1148.389 | 13.61517 | 1148.386 | 13.67193 | 1148.388 | 13.69384 | 1148.388 |
| 1148.39  | 13.7158 | 1148.389 | 13.62    | 1148.386 | 13.68    | 1148.388 | 13.7     | 1148.388 |
| 1148.39  | 13.72   | 1148.389 | 13.62517 | 1148.386 | 13.68193 | 1148.388 | 13.70384 | 1148.389 |
| 1148.39  | 13.7258 | 1148.389 | 13.63    | 1148.386 | 13.69    | 1148.388 | 13.71    | 1148.389 |
| 1148.39  | 13.73   | 1148.389 | 13.63517 | 1148.387 | 13.69193 | 1148.388 | 13.71384 | 1148.389 |
| 1148.391 | 13.7358 | 1148.389 | 13.64    | 1148.387 | 13.7     | 1148.388 | 13.72    | 1148.389 |
| 1148.391 | 13.74   | 1148.39  | 13.64517 | 1148.387 | 13.70193 | 1148.388 | 13.72384 | 1148.389 |
| 1148.391 | 13.7458 | 1148.39  | 13.65    | 1148.387 | 13.71    | 1148.389 | 13.73    | 1148.389 |
| 1148.391 | 13.75   | 1148.39  | 13.65517 | 1148.387 | 13.71193 | 1148.389 | 13.73384 | 1148.389 |
| 1148.391 | 13.7558 | 1148.39  | 13.66    | 1148.387 | 13.72    | 1148.389 | 13.74    | 1148.389 |
| 1148.391 | 13.76   | 1148.39  | 13.66517 | 1148.388 | 13.72193 | 1148.389 | 13.74384 | 1148.39  |
| 1148.391 | 13.7658 | 1148.39  | 13.67    | 1148.388 | 13.73    | 1148.389 | 13.75    | 1148.39  |
| 1148.391 | 13.77   | 1148.39  | 13.67517 | 1148.388 | 13.73193 | 1148.389 | 13.75384 | 1148.39  |
| 1148.391 | 13.7758 | 1148.39  | 13.68    | 1148.388 | 13.74    | 1148.389 | 13.76    | 1148.39  |

|          |         |          |          |          |          |          |          |          |
|----------|---------|----------|----------|----------|----------|----------|----------|----------|
| 1148.392 | 13.78   | 1148.391 | 13.68517 | 1148.388 | 13.74193 | 1148.389 | 13.76384 | 1148.39  |
| 1148.392 | 13.7858 | 1148.391 | 13.69    | 1148.388 | 13.75    | 1148.39  | 13.77    | 1148.39  |
| 1148.392 | 13.79   | 1148.391 | 13.69517 | 1148.388 | 13.75193 | 1148.39  | 13.77384 | 1148.39  |
| 1148.392 | 13.7958 | 1148.391 | 13.7     | 1148.388 | 13.76    | 1148.39  | 13.78    | 1148.39  |
| 1148.392 | 13.8    | 1148.391 | 13.70517 | 1148.389 | 13.76193 | 1148.39  | 13.78384 | 1148.391 |
| 1148.392 | 13.8058 | 1148.391 | 13.71    | 1148.389 | 13.77    | 1148.39  | 13.79    | 1148.391 |
| 1148.392 | 13.81   | 1148.391 | 13.71517 | 1148.389 | 13.77193 | 1148.39  | 13.79384 | 1148.391 |
| 1148.392 | 13.8158 | 1148.391 | 13.72    | 1148.389 | 13.78    | 1148.39  | 13.8     | 1148.391 |
| 1148.392 | 13.82   | 1148.391 | 13.72517 | 1148.389 | 13.78193 | 1148.39  | 13.80384 | 1148.391 |
| 1148.392 | 13.8258 | 1148.392 | 13.73    | 1148.389 | 13.79    | 1148.391 | 13.81    | 1148.391 |
| 1148.393 | 13.83   | 1148.392 | 13.73517 | 1148.389 | 13.79193 | 1148.391 | 13.81384 | 1148.391 |
| 1148.393 | 13.8358 | 1148.392 | 13.74    | 1148.39  | 13.8     | 1148.391 | 13.82    | 1148.391 |
| 1148.393 | 13.84   | 1148.392 | 13.74517 | 1148.39  | 13.80193 | 1148.391 | 13.82384 | 1148.391 |
| 1148.393 | 13.8458 | 1148.392 | 13.75    | 1148.39  | 13.81    | 1148.391 | 13.83    | 1148.392 |
| 1148.393 | 13.85   | 1148.392 | 13.75517 | 1148.39  | 13.81193 | 1148.391 | 13.83384 | 1148.392 |
| 1148.393 | 13.8558 | 1148.392 | 13.76    | 1148.39  | 13.82    | 1148.391 | 13.84    | 1148.392 |
| 1148.393 | 13.86   | 1148.392 | 13.76517 | 1148.39  | 13.82193 | 1148.391 | 13.84384 | 1148.392 |
| 1148.393 | 13.8658 | 1148.392 | 13.77    | 1148.39  | 13.83    | 1148.391 | 13.85    | 1148.392 |
| 1148.393 | 13.87   | 1148.392 | 13.77517 | 1148.39  | 13.83193 | 1148.392 | 13.85384 | 1148.392 |
| 1148.393 | 13.8758 | 1148.393 | 13.78    | 1148.391 | 13.84    | 1148.392 | 13.86    | 1148.392 |
| 1148.394 | 13.88   | 1148.393 | 13.78517 | 1148.391 | 13.84193 | 1148.392 | 13.86384 | 1148.392 |
| 1148.394 | 13.8858 | 1148.393 | 13.79    | 1148.391 | 13.85    | 1148.392 | 13.87    | 1148.392 |
| 1148.394 | 13.89   | 1148.393 | 13.79517 | 1148.391 | 13.85193 | 1148.392 | 13.87384 | 1148.392 |
| 1148.394 | 13.8958 | 1148.393 | 13.8     | 1148.391 | 13.86    | 1148.392 | 13.88    | 1148.393 |
| 1148.394 | 13.9    | 1148.393 | 13.80517 | 1148.391 | 13.86193 | 1148.392 | 13.88384 | 1148.393 |
| 1148.394 | 13.9058 | 1148.393 | 13.81    | 1148.391 | 13.87    | 1148.392 | 13.89    | 1148.393 |
| 1148.394 | 13.91   | 1148.393 | 13.81517 | 1148.391 | 13.87193 | 1148.392 | 13.89384 | 1148.393 |
| 1148.394 | 13.9158 | 1148.393 | 13.82    | 1148.391 | 13.88    | 1148.393 | 13.9     | 1148.393 |
| 1148.394 | 13.92   | 1148.393 | 13.82517 | 1148.392 | 13.88193 | 1148.393 | 13.90384 | 1148.393 |
| 1148.394 | 13.9258 | 1148.394 | 13.83    | 1148.392 | 13.89    | 1148.393 | 13.91    | 1148.393 |
| 1148.394 | 13.93   | 1148.394 | 13.83517 | 1148.392 | 13.89193 | 1148.393 | 13.91384 | 1148.393 |
| 1148.394 | 13.9358 | 1148.394 | 13.84    | 1148.392 | 13.9     | 1148.393 | 13.92    | 1148.393 |
| 1148.395 | 13.94   | 1148.394 | 13.84517 | 1148.392 | 13.90193 | 1148.393 | 13.92384 | 1148.393 |
| 1148.395 | 13.9458 | 1148.394 | 13.85    | 1148.392 | 13.91    | 1148.393 | 13.93    | 1148.394 |
| 1148.395 | 13.95   | 1148.394 | 13.85517 | 1148.392 | 13.91193 | 1148.393 | 13.93384 | 1148.394 |
| 1148.395 | 13.9558 | 1148.394 | 13.86    | 1148.392 | 13.92    | 1148.393 | 13.94    | 1148.394 |
| 1148.395 | 13.96   | 1148.394 | 13.86517 | 1148.392 | 13.92193 | 1148.393 | 13.94384 | 1148.394 |
| 1148.395 | 13.9658 | 1148.394 | 13.87    | 1148.392 | 13.93    | 1148.393 | 13.95    | 1148.394 |
| 1148.395 | 13.97   | 1148.394 | 13.87517 | 1148.393 | 13.93193 | 1148.393 | 13.95384 | 1148.394 |
| 1148.395 | 13.9758 | 1148.394 | 13.88    | 1148.393 | 13.94    | 1148.394 | 13.96    | 1148.394 |
| 1148.395 | 13.98   | 1148.394 | 13.88517 | 1148.393 | 13.94193 | 1148.394 | 13.96384 | 1148.394 |
| 1148.395 | 13.9858 | 1148.395 | 13.89    | 1148.393 | 13.95    | 1148.394 | 13.97    | 1148.394 |
| 1148.395 | 13.99   | 1148.395 | 13.89517 | 1148.393 | 13.95193 | 1148.394 | 13.97384 | 1148.394 |
| 1148.395 | 13.9958 | 1148.395 | 13.9     | 1148.393 | 13.96    | 1148.394 | 13.98    | 1148.394 |
| 1148.395 | 14      | 1148.395 | 13.90517 | 1148.393 | 13.96193 | 1148.394 | 13.98384 | 1148.394 |
| 1148.396 | 14.0058 | 1148.395 | 13.91    | 1148.393 | 13.97    | 1148.394 | 13.99    | 1148.395 |
| 1148.396 | 14.01   | 1148.395 | 13.91517 | 1148.393 | 13.97193 | 1148.394 | 13.99384 | 1148.395 |

|          |         |          |          |          |          |          |          |          |
|----------|---------|----------|----------|----------|----------|----------|----------|----------|
| 1148.396 | 14.0158 | 1148.395 | 13.92    | 1148.393 | 13.98    | 1148.394 | 14       | 1148.395 |
| 1148.396 | 14.02   | 1148.395 | 13.92517 | 1148.393 | 13.98193 | 1148.394 | 14.00384 | 1148.395 |
| 1148.396 | 14.0258 | 1148.395 | 13.93    | 1148.394 | 13.99    | 1148.394 | 14.01    | 1148.395 |
| 1148.396 | 14.03   | 1148.395 | 13.93517 | 1148.394 | 13.99193 | 1148.394 | 14.01384 | 1148.395 |
| 1148.396 | 14.0358 | 1148.395 | 13.94    | 1148.394 | 14       | 1148.395 | 14.02    | 1148.395 |
| 1148.396 | 14.04   | 1148.395 | 13.94517 | 1148.394 | 14.00193 | 1148.395 | 14.02384 | 1148.395 |
| 1148.396 | 14.0458 | 1148.395 | 13.95    | 1148.394 | 14.01    | 1148.395 | 14.03    | 1148.395 |
| 1148.396 | 14.05   | 1148.395 | 13.95517 | 1148.394 | 14.01193 | 1148.395 | 14.03384 | 1148.395 |
| 1148.396 | 14.0558 | 1148.396 | 13.96    | 1148.394 | 14.02    | 1148.395 | 14.04    | 1148.395 |
| 1148.396 | 14.06   | 1148.396 | 13.96517 | 1148.394 | 14.02193 | 1148.395 | 14.04384 | 1148.395 |
| 1148.396 | 14.0658 | 1148.396 | 13.97    | 1148.394 | 14.03    | 1148.395 | 14.05    | 1148.395 |
| 1148.396 | 14.07   | 1148.396 | 13.97517 | 1148.394 | 14.03193 | 1148.395 | 14.05384 | 1148.396 |
| 1148.396 | 14.0758 | 1148.396 | 13.98    | 1148.394 | 14.04    | 1148.395 | 14.06    | 1148.396 |
| 1148.397 | 14.08   | 1148.396 | 13.98517 | 1148.395 | 14.04193 | 1148.395 | 14.06384 | 1148.396 |
| 1148.397 | 14.0858 | 1148.396 | 13.99    | 1148.395 | 14.05    | 1148.395 | 14.07    | 1148.396 |
| 1148.397 | 14.09   | 1148.396 | 13.99517 | 1148.395 | 14.05193 | 1148.395 | 14.07384 | 1148.396 |
| 1148.397 | 14.0958 | 1148.396 | 14       | 1148.395 | 14.06    | 1148.396 | 14.08    | 1148.396 |
| 1148.397 | 14.1    | 1148.396 | 14.00517 | 1148.395 | 14.06193 | 1148.396 | 14.08384 | 1148.396 |
| 1148.397 | 14.1058 | 1148.396 | 14.01    | 1148.395 | 14.07    | 1148.396 | 14.09    | 1148.396 |
| 1148.397 | 14.11   | 1148.396 | 14.01517 | 1148.395 | 14.07193 | 1148.396 | 14.09384 | 1148.396 |
| 1148.397 | 14.1158 | 1148.396 | 14.02    | 1148.395 | 14.08    | 1148.396 | 14.1     | 1148.396 |
| 1148.397 | 14.12   | 1148.396 | 14.02517 | 1148.395 | 14.08193 | 1148.396 | 14.10384 | 1148.396 |
| 1148.397 | 14.1258 | 1148.396 | 14.03    | 1148.395 | 14.09    | 1148.396 | 14.11    | 1148.396 |
| 1148.397 | 14.13   | 1148.397 | 14.03517 | 1148.395 | 14.09193 | 1148.396 | 14.11384 | 1148.396 |
| 1148.397 | 14.1358 | 1148.397 | 14.04    | 1148.395 | 14.1     | 1148.396 | 14.12    | 1148.396 |
| 1148.397 | 14.14   | 1148.397 | 14.04517 | 1148.395 | 14.10193 | 1148.396 | 14.12384 | 1148.396 |
| 1148.397 | 14.1458 | 1148.397 | 14.05    | 1148.395 | 14.11    | 1148.396 | 14.13    | 1148.397 |
| 1148.397 | 14.15   | 1148.397 | 14.05517 | 1148.396 | 14.11193 | 1148.396 | 14.13384 | 1148.397 |
| 1148.397 | 14.1558 | 1148.397 | 14.06    | 1148.396 | 14.12    | 1148.396 | 14.14    | 1148.397 |
| 1148.397 | 14.16   | 1148.397 | 14.06517 | 1148.396 | 14.12193 | 1148.396 | 14.14384 | 1148.397 |
| 1148.397 | 14.1658 | 1148.397 | 14.07    | 1148.396 | 14.13    | 1148.396 | 14.15    | 1148.397 |
| 1148.398 | 14.17   | 1148.397 | 14.07517 | 1148.396 | 14.13193 | 1148.396 | 14.15384 | 1148.397 |
| 1148.398 | 14.1758 | 1148.397 | 14.08    | 1148.396 | 14.14    | 1148.397 | 14.16    | 1148.397 |
| 1148.398 | 14.18   | 1148.397 | 14.08517 | 1148.396 | 14.14193 | 1148.397 | 14.16384 | 1148.397 |
| 1148.398 | 14.1858 | 1148.397 | 14.09    | 1148.396 | 14.15    | 1148.397 | 14.17    | 1148.397 |
| 1148.398 | 14.19   | 1148.397 | 14.09517 | 1148.396 | 14.15193 | 1148.397 | 14.17384 | 1148.397 |
| 1148.398 | 14.1958 | 1148.397 | 14.1     | 1148.396 | 14.16    | 1148.397 | 14.18    | 1148.397 |
| 1148.398 | 14.2    | 1148.397 | 14.10517 | 1148.396 | 14.16193 | 1148.397 | 14.18384 | 1148.397 |
| 1148.398 | 14.2058 | 1148.397 | 14.11    | 1148.396 | 14.17    | 1148.397 | 14.19    | 1148.397 |
| 1148.398 | 14.21   | 1148.397 | 14.11517 | 1148.396 | 14.17193 | 1148.397 | 14.19384 | 1148.397 |
| 1148.398 | 14.2158 | 1148.398 | 14.12    | 1148.396 | 14.18    | 1148.397 | 14.2     | 1148.397 |
| 1148.398 | 14.22   | 1148.398 | 14.12517 | 1148.396 | 14.18193 | 1148.397 | 14.20384 | 1148.397 |
| 1148.398 | 14.2258 | 1148.398 | 14.13    | 1148.397 | 14.19    | 1148.397 | 14.21    | 1148.397 |
| 1148.398 | 14.23   | 1148.398 | 14.13517 | 1148.397 | 14.19193 | 1148.397 | 14.21384 | 1148.397 |
| 1148.398 | 14.2358 | 1148.398 | 14.14    | 1148.397 | 14.2     | 1148.397 | 14.22    | 1148.398 |
| 1148.398 | 14.24   | 1148.398 | 14.14517 | 1148.397 | 14.20193 | 1148.397 | 14.22384 | 1148.398 |
| 1148.398 | 14.2458 | 1148.398 | 14.15    | 1148.397 | 14.21    | 1148.397 | 14.23    | 1148.398 |



|          |         |          |          |          |          |          |          |          |
|----------|---------|----------|----------|----------|----------|----------|----------|----------|
| 1148.398 | 14.25   | 1148.398 | 14.15517 | 1148.397 | 14.21193 | 1148.397 | 14.23384 | 1148.398 |
| 1148.398 | 14.2558 | 1148.398 | 14.16    | 1148.397 | 14.22    | 1148.397 | 14.24    | 1148.398 |
| 1148.398 | 14.26   | 1148.398 | 14.16517 | 1148.397 | 14.22193 | 1148.397 | 14.24384 | 1148.398 |
| 1148.398 | 14.2658 | 1148.398 | 14.17    | 1148.397 | 14.23    | 1148.398 | 14.25    | 1148.398 |
| 1148.398 | 14.27   | 1148.398 | 14.17517 | 1148.397 | 14.23193 | 1148.398 | 14.25384 | 1148.398 |
| 1148.399 | 14.2758 | 1148.398 | 14.18    | 1148.397 | 14.24    | 1148.398 | 14.26    | 1148.398 |
| 1148.399 | 14.28   | 1148.398 | 14.18517 | 1148.397 | 14.24193 | 1148.398 | 14.26384 | 1148.398 |
| 1148.399 | 14.2858 | 1148.398 | 14.19    | 1148.397 | 14.25    | 1148.398 | 14.27    | 1148.398 |
| 1148.399 | 14.29   | 1148.398 | 14.19517 | 1148.397 | 14.25193 | 1148.398 | 14.27384 | 1148.398 |
| 1148.399 | 14.2958 | 1148.398 | 14.2     | 1148.397 | 14.26    | 1148.398 | 14.28    | 1148.398 |
| 1148.399 | 14.3    | 1148.398 | 14.20517 | 1148.397 | 14.26193 | 1148.398 | 14.28384 | 1148.398 |
| 1148.399 | 14.3058 | 1148.398 | 14.21    | 1148.397 | 14.27    | 1148.398 | 14.29    | 1148.398 |
| 1148.399 | 14.31   | 1148.398 | 14.21517 | 1148.397 | 14.27193 | 1148.398 | 14.29384 | 1148.398 |
| 1148.399 | 14.3158 | 1148.398 | 14.22    | 1148.398 | 14.28    | 1148.398 | 14.3     | 1148.398 |
| 1148.399 | 14.32   | 1148.398 | 14.22517 | 1148.398 | 14.28193 | 1148.398 | 14.30384 | 1148.398 |
| 1148.399 | 14.3258 | 1148.399 | 14.23    | 1148.398 | 14.29    | 1148.398 | 14.31    | 1148.398 |
| 1148.399 | 14.33   | 1148.399 | 14.23517 | 1148.398 | 14.29193 | 1148.398 | 14.31384 | 1148.398 |
| 1148.399 | 14.3358 | 1148.399 | 14.24    | 1148.398 | 14.3     | 1148.398 | 14.32    | 1148.398 |
| 1148.399 | 14.34   | 1148.399 | 14.24517 | 1148.398 | 14.30193 | 1148.398 | 14.32384 | 1148.398 |
| 1148.399 | 14.3458 | 1148.399 | 14.25    | 1148.398 | 14.31    | 1148.398 | 14.33    | 1148.399 |
| 1148.399 | 14.35   | 1148.399 | 14.25517 | 1148.398 | 14.31193 | 1148.398 | 14.33384 | 1148.399 |
| 1148.399 | 14.3558 | 1148.399 | 14.26    | 1148.398 | 14.32    | 1148.398 | 14.34    | 1148.399 |
| 1148.399 | 14.36   | 1148.399 | 14.26517 | 1148.398 | 14.32193 | 1148.398 | 14.34384 | 1148.399 |
| 1148.399 | 14.3658 | 1148.399 | 14.27    | 1148.398 | 14.33    | 1148.398 | 14.35    | 1148.399 |
| 1148.399 | 14.37   | 1148.399 | 14.27517 | 1148.398 | 14.33193 | 1148.399 | 14.35384 | 1148.399 |
| 1148.399 | 14.3758 | 1148.399 | 14.28    | 1148.398 | 14.34    | 1148.399 | 14.36    | 1148.399 |
| 1148.399 | 14.38   | 1148.399 | 14.28517 | 1148.398 | 14.34193 | 1148.399 | 14.36384 | 1148.399 |
| 1148.399 | 14.3858 | 1148.399 | 14.29    | 1148.398 | 14.35    | 1148.399 | 14.37    | 1148.399 |
| 1148.399 | 14.39   | 1148.399 | 14.29517 | 1148.398 | 14.35193 | 1148.399 | 14.37384 | 1148.399 |
| 1148.399 | 14.3958 | 1148.399 | 14.3     | 1148.398 | 14.36    | 1148.399 | 14.38    | 1148.399 |
| 1148.399 | 14.4    | 1148.399 | 14.30517 | 1148.398 | 14.36193 | 1148.399 | 14.38384 | 1148.399 |
| 1148.399 | 14.4058 | 1148.399 | 14.31    | 1148.398 | 14.37    | 1148.399 | 14.39    | 1148.399 |
| 1148.4   | 14.41   | 1148.399 | 14.31517 | 1148.398 | 14.37193 | 1148.399 | 14.39384 | 1148.399 |
| 1148.4   | 14.4158 | 1148.399 | 14.32    | 1148.398 | 14.38    | 1148.399 | 14.4     | 1148.399 |
| 1148.4   | 14.42   | 1148.399 | 14.32517 | 1148.399 | 14.38193 | 1148.399 | 14.40384 | 1148.399 |
| 1148.4   | 14.4258 | 1148.399 | 14.33    | 1148.399 | 14.39    | 1148.399 | 14.41    | 1148.399 |
| 1148.4   | 14.43   | 1148.399 | 14.33517 | 1148.399 | 14.39193 | 1148.399 | 14.41384 | 1148.399 |
| 1148.4   | 14.4358 | 1148.399 | 14.34    | 1148.399 | 14.4     | 1148.399 | 14.42    | 1148.399 |
| 1148.4   | 14.44   | 1148.399 | 14.34517 | 1148.399 | 14.40193 | 1148.399 | 14.42384 | 1148.399 |
| 1148.4   | 14.4458 | 1148.399 | 14.35    | 1148.399 | 14.41    | 1148.399 | 14.43    | 1148.399 |
| 1148.4   | 14.45   | 1148.399 | 14.35517 | 1148.399 | 14.41193 | 1148.399 | 14.43384 | 1148.399 |
| 1148.4   | 14.4558 | 1148.4   | 14.36    | 1148.399 | 14.42    | 1148.399 | 14.44    | 1148.399 |
| 1148.4   | 14.46   | 1148.4   | 14.36517 | 1148.399 | 14.42193 | 1148.399 | 14.44384 | 1148.399 |
| 1148.4   | 14.4658 | 1148.4   | 14.37    | 1148.399 | 14.43    | 1148.399 | 14.45    | 1148.399 |
| 1148.4   | 14.47   | 1148.4   | 14.37517 | 1148.399 | 14.43193 | 1148.399 | 14.45384 | 1148.399 |
| 1148.4   | 14.4758 | 1148.4   | 14.38    | 1148.399 | 14.44    | 1148.399 | 14.46    | 1148.4   |
| 1148.4   | 14.48   | 1148.4   | 14.38517 | 1148.399 | 14.44193 | 1148.399 | 14.46384 | 1148.4   |

|          |         |          |          |          |          |          |          |          |
|----------|---------|----------|----------|----------|----------|----------|----------|----------|
| 1148.4   | 14.4858 | 1148.4   | 14.39    | 1148.399 | 14.45    | 1148.399 | 14.47    | 1148.4   |
| 1148.4   | 14.49   | 1148.4   | 14.39517 | 1148.399 | 14.45193 | 1148.399 | 14.47384 | 1148.4   |
| 1148.4   | 14.4958 | 1148.4   | 14.4     | 1148.399 | 14.46    | 1148.399 | 14.48    | 1148.4   |
| 1148.4   | 14.5    | 1148.4   | 14.40517 | 1148.399 | 14.46193 | 1148.399 | 14.48384 | 1148.4   |
| 1148.4   | 14.5058 | 1148.4   | 14.41    | 1148.399 | 14.47    | 1148.4   | 14.49    | 1148.4   |
| 1148.4   | 14.51   | 1148.4   | 14.41517 | 1148.399 | 14.47193 | 1148.4   | 14.49384 | 1148.4   |
| 1148.4   | 14.5158 | 1148.4   | 14.42    | 1148.399 | 14.48    | 1148.4   | 14.5     | 1148.4   |
| 1148.4   | 14.52   | 1148.4   | 14.42517 | 1148.399 | 14.48193 | 1148.4   | 14.50384 | 1148.4   |
| 1148.4   | 14.5258 | 1148.4   | 14.43    | 1148.399 | 14.49    | 1148.4   | 14.51    | 1148.4   |
| 1148.4   | 14.53   | 1148.4   | 14.43517 | 1148.399 | 14.49193 | 1148.4   | 14.51384 | 1148.4   |
| 1148.4   | 14.5358 | 1148.4   | 14.44    | 1148.399 | 14.5     | 1148.4   | 14.52    | 1148.4   |
| 1148.4   | 14.54   | 1148.4   | 14.44517 | 1148.399 | 14.50193 | 1148.4   | 14.52384 | 1148.4   |
| 1148.4   | 14.5458 | 1148.4   | 14.45    | 1148.399 | 14.51    | 1148.4   | 14.53    | 1148.4   |
| 1148.4   | 14.55   | 1148.4   | 14.45517 | 1148.4   | 14.51193 | 1148.4   | 14.53384 | 1148.4   |
| 1148.4   | 14.5558 | 1148.4   | 14.46    | 1148.4   | 14.52    | 1148.4   | 14.54    | 1148.4   |
| 1148.4   | 14.56   | 1148.4   | 14.46517 | 1148.4   | 14.52193 | 1148.4   | 14.54384 | 1148.4   |
| 1148.4   | 14.5658 | 1148.4   | 14.47    | 1148.4   | 14.53    | 1148.4   | 14.55    | 1148.4   |
| 1148.4   | 14.57   | 1148.4   | 14.47517 | 1148.4   | 14.53193 | 1148.4   | 14.55384 | 1148.4   |
| 1148.4   | 14.5758 | 1148.4   | 14.48    | 1148.4   | 14.54    | 1148.4   | 14.56    | 1148.4   |
| 1148.4   | 14.58   | 1148.4   | 14.48517 | 1148.4   | 14.54193 | 1148.4   | 14.56384 | 1148.4   |
| 1148.4   | 14.5858 | 1148.4   | 14.49    | 1148.4   | 14.55    | 1148.4   | 14.57    | 1148.4   |
| 1148.401 | 14.59   | 1148.4   | 14.49517 | 1148.4   | 14.55193 | 1148.4   | 14.57384 | 1148.4   |
| 1148.401 | 14.5958 | 1148.4   | 14.5     | 1148.4   | 14.56    | 1148.4   | 14.58    | 1148.4   |
| 1148.401 | 14.6    | 1148.4   | 14.50517 | 1148.4   | 14.56193 | 1148.4   | 14.58384 | 1148.4   |
| 1148.401 | 14.6058 | 1148.4   | 14.51    | 1148.4   | 14.57    | 1148.4   | 14.59    | 1148.4   |
| 1148.401 | 14.61   | 1148.4   | 14.51517 | 1148.4   | 14.57193 | 1148.4   | 14.59384 | 1148.4   |
| 1148.401 | 14.6158 | 1148.4   | 14.52    | 1148.4   | 14.58    | 1148.4   | 14.6     | 1148.4   |
| 1148.401 | 14.62   | 1148.4   | 14.52517 | 1148.4   | 14.58193 | 1148.4   | 14.60384 | 1148.4   |
| 1148.401 | 14.6258 | 1148.4   | 14.53    | 1148.4   | 14.59    | 1148.4   | 14.61    | 1148.4   |
| 1148.401 | 14.63   | 1148.4   | 14.53517 | 1148.4   | 14.59193 | 1148.4   | 14.61384 | 1148.4   |
| 1148.401 | 14.6358 | 1148.401 | 14.54    | 1148.4   | 14.6     | 1148.4   | 14.62    | 1148.4   |
| 1148.401 | 14.64   | 1148.401 | 14.54517 | 1148.4   | 14.60193 | 1148.4   | 14.62384 | 1148.4   |
| 1148.401 | 14.6458 | 1148.401 | 14.55    | 1148.4   | 14.61    | 1148.4   | 14.63    | 1148.4   |
| 1148.401 | 14.65   | 1148.401 | 14.55517 | 1148.4   | 14.61193 | 1148.4   | 14.63384 | 1148.4   |
| 1148.401 | 14.6558 | 1148.401 | 14.56    | 1148.4   | 14.62    | 1148.4   | 14.64    | 1148.401 |
| 1148.401 | 14.66   | 1148.401 | 14.56517 | 1148.4   | 14.62193 | 1148.4   | 14.64384 | 1148.401 |
| 1148.401 | 14.6658 | 1148.401 | 14.57    | 1148.4   | 14.63    | 1148.4   | 14.65    | 1148.401 |
| 1148.401 | 14.67   | 1148.401 | 14.57517 | 1148.4   | 14.63193 | 1148.4   | 14.65384 | 1148.401 |
| 1148.401 | 14.6758 | 1148.401 | 14.58    | 1148.4   | 14.64    | 1148.4   | 14.66    | 1148.401 |
| 1148.401 | 14.68   | 1148.401 | 14.58517 | 1148.4   | 14.64193 | 1148.4   | 14.66384 | 1148.401 |
| 1148.401 | 14.6858 | 1148.401 | 14.59    | 1148.4   | 14.65    | 1148.401 | 14.67    | 1148.401 |
| 1148.401 | 14.69   | 1148.401 | 14.59517 | 1148.4   | 14.65193 | 1148.401 | 14.67384 | 1148.401 |
| 1148.401 | 14.6958 | 1148.401 | 14.6     | 1148.4   | 14.66    | 1148.401 | 14.68    | 1148.401 |
| 1148.401 | 14.7    | 1148.401 | 14.60517 | 1148.4   | 14.66193 | 1148.401 | 14.68384 | 1148.401 |
| 1148.401 | 14.7058 | 1148.401 | 14.61    | 1148.4   | 14.67    | 1148.401 | 14.69    | 1148.401 |
| 1148.401 | 14.71   | 1148.401 | 14.61517 | 1148.4   | 14.67193 | 1148.401 | 14.69384 | 1148.401 |
| 1148.401 | 14.7158 | 1148.401 | 14.62    | 1148.4   | 14.68    | 1148.401 | 14.7     | 1148.401 |

|          |         |          |          |          |          |          |          |          |
|----------|---------|----------|----------|----------|----------|----------|----------|----------|
| 1148.401 | 14.72   | 1148.401 | 14.62517 | 1148.4   | 14.68193 | 1148.401 | 14.70384 | 1148.401 |
| 1148.401 | 14.7258 | 1148.401 | 14.63    | 1148.4   | 14.69    | 1148.401 | 14.71    | 1148.401 |
| 1148.401 | 14.73   | 1148.401 | 14.63517 | 1148.401 | 14.69193 | 1148.401 | 14.71384 | 1148.401 |
| 1148.401 | 14.7358 | 1148.401 | 14.64    | 1148.401 | 14.7     | 1148.401 | 14.72    | 1148.401 |
| 1148.401 | 14.74   | 1148.401 | 14.64517 | 1148.401 | 14.70193 | 1148.401 | 14.72384 | 1148.401 |
| 1148.401 | 14.7458 | 1148.401 | 14.65    | 1148.401 | 14.71    | 1148.401 | 14.73    | 1148.401 |
| 1148.401 | 14.75   | 1148.401 | 14.65517 | 1148.401 | 14.71193 | 1148.401 | 14.73384 | 1148.401 |
| 1148.401 | 14.7558 | 1148.401 | 14.66    | 1148.401 | 14.72    | 1148.401 | 14.74    | 1148.401 |
| 1148.401 | 14.76   | 1148.401 | 14.66517 | 1148.401 | 14.72193 | 1148.401 | 14.74384 | 1148.401 |
| 1148.401 | 14.7658 | 1148.401 | 14.67    | 1148.401 | 14.73    | 1148.401 | 14.75    | 1148.401 |
| 1148.401 | 14.77   | 1148.401 | 14.67517 | 1148.401 | 14.73193 | 1148.401 | 14.75384 | 1148.401 |
| 1148.401 | 14.7758 | 1148.401 | 14.68    | 1148.401 | 14.74    | 1148.401 | 14.76    | 1148.401 |
| 1148.401 | 14.78   | 1148.401 | 14.68517 | 1148.401 | 14.74193 | 1148.401 | 14.76384 | 1148.401 |
| 1148.401 | 14.7858 | 1148.401 | 14.69    | 1148.401 | 14.75    | 1148.401 | 14.77    | 1148.401 |
| 1148.401 | 14.79   | 1148.401 | 14.69517 | 1148.401 | 14.75193 | 1148.401 | 14.77384 | 1148.401 |
| 1148.401 | 14.7958 | 1148.401 | 14.7     | 1148.401 | 14.76    | 1148.401 | 14.78    | 1148.401 |
| 1148.401 | 14.8    | 1148.401 | 14.70517 | 1148.401 | 14.76193 | 1148.401 | 14.78384 | 1148.401 |
| 1148.401 | 14.8058 | 1148.401 | 14.71    | 1148.401 | 14.77    | 1148.401 | 14.79    | 1148.401 |
| 1148.401 | 14.81   | 1148.401 | 14.71517 | 1148.401 | 14.77193 | 1148.401 | 14.79384 | 1148.401 |
| 1148.401 | 14.8158 | 1148.401 | 14.72    | 1148.401 | 14.78    | 1148.401 | 14.8     | 1148.401 |
| 1148.401 | 14.82   | 1148.401 | 14.72517 | 1148.401 | 14.78193 | 1148.401 | 14.80384 | 1148.401 |
| 1148.401 | 14.8258 | 1148.401 | 14.73    | 1148.401 | 14.79    | 1148.401 | 14.81    | 1148.401 |
| 1148.401 | 14.83   | 1148.401 | 14.73517 | 1148.401 | 14.79193 | 1148.401 | 14.81384 | 1148.401 |
| 1148.401 | 14.8358 | 1148.401 | 14.74    | 1148.401 | 14.8     | 1148.401 | 14.82    | 1148.401 |
| 1148.401 | 14.84   | 1148.401 | 14.74517 | 1148.401 | 14.80193 | 1148.401 | 14.82384 | 1148.401 |
| 1148.401 | 14.8458 | 1148.401 | 14.75    | 1148.401 | 14.81    | 1148.401 | 14.83    | 1148.401 |
| 1148.401 | 14.85   | 1148.401 | 14.75517 | 1148.401 | 14.81193 | 1148.401 | 14.83384 | 1148.401 |
| 1148.401 | 14.8558 | 1148.401 | 14.76    | 1148.401 | 14.82    | 1148.401 | 14.84    | 1148.401 |
| 1148.402 | 14.86   | 1148.401 | 14.76517 | 1148.401 | 14.82193 | 1148.401 | 14.84384 | 1148.401 |
| 1148.402 | 14.8658 | 1148.401 | 14.77    | 1148.401 | 14.83    | 1148.401 | 14.85    | 1148.401 |
| 1148.402 | 14.87   | 1148.401 | 14.77517 | 1148.401 | 14.83193 | 1148.401 | 14.85384 | 1148.401 |
| 1148.402 | 14.8758 | 1148.401 | 14.78    | 1148.401 | 14.84    | 1148.401 | 14.86    | 1148.401 |
| 1148.402 | 14.88   | 1148.401 | 14.78517 | 1148.401 | 14.84193 | 1148.401 | 14.86384 | 1148.401 |
| 1148.402 | 14.8858 | 1148.401 | 14.79    | 1148.401 | 14.85    | 1148.401 | 14.87    | 1148.401 |
| 1148.402 | 14.89   | 1148.401 | 14.79517 | 1148.401 | 14.85193 | 1148.401 | 14.87384 | 1148.401 |
| 1148.402 | 14.8958 | 1148.401 | 14.8     | 1148.401 | 14.86    | 1148.401 | 14.88    | 1148.401 |
| 1148.402 | 14.9    | 1148.401 | 14.80517 | 1148.401 | 14.86193 | 1148.401 | 14.88384 | 1148.401 |
| 1148.402 | 14.9058 | 1148.402 | 14.81    | 1148.401 | 14.87    | 1148.401 | 14.89    | 1148.401 |
| 1148.402 | 14.91   | 1148.402 | 14.81517 | 1148.401 | 14.87193 | 1148.401 | 14.89384 | 1148.401 |
| 1148.402 | 14.9158 | 1148.402 | 14.82    | 1148.401 | 14.88    | 1148.401 | 14.9     | 1148.401 |
| 1148.402 | 14.92   | 1148.402 | 14.82517 | 1148.401 | 14.88193 | 1148.401 | 14.90384 | 1148.401 |
| 1148.402 | 14.9258 | 1148.402 | 14.83    | 1148.401 | 14.89    | 1148.401 | 14.91    | 1148.402 |
| 1148.402 | 14.93   | 1148.402 | 14.83517 | 1148.401 | 14.89193 | 1148.401 | 14.91384 | 1148.402 |
| 1148.402 | 14.9358 | 1148.402 | 14.84    | 1148.401 | 14.9     | 1148.401 | 14.92    | 1148.402 |
| 1148.402 | 14.94   | 1148.402 | 14.84517 | 1148.401 | 14.90193 | 1148.401 | 14.92384 | 1148.402 |
| 1148.402 | 14.9458 | 1148.402 | 14.85    | 1148.401 | 14.91    | 1148.401 | 14.93    | 1148.402 |
| 1148.402 | 14.95   | 1148.402 | 14.85517 | 1148.401 | 14.91193 | 1148.401 | 14.93384 | 1148.402 |

|          |         |          |          |          |          |          |          |          |
|----------|---------|----------|----------|----------|----------|----------|----------|----------|
| 1148.402 | 14.9558 | 1148.402 | 14.86    | 1148.401 | 14.92    | 1148.402 | 14.94    | 1148.402 |
| 1148.402 | 14.96   | 1148.402 | 14.86517 | 1148.401 | 14.92193 | 1148.402 | 14.94384 | 1148.402 |
| 1148.402 | 14.9658 | 1148.402 | 14.87    | 1148.401 | 14.93    | 1148.402 | 14.95    | 1148.402 |
| 1148.402 | 14.97   | 1148.402 | 14.87517 | 1148.401 | 14.93193 | 1148.402 | 14.95384 | 1148.402 |
| 1148.402 | 14.9758 | 1148.402 | 14.88    | 1148.401 | 14.94    | 1148.402 | 14.96    | 1148.402 |
| 1148.402 | 14.98   | 1148.402 | 14.88517 | 1148.401 | 14.94193 | 1148.402 | 14.96384 | 1148.402 |
| 1148.402 | 14.9858 | 1148.402 | 14.89    | 1148.401 | 14.95    | 1148.402 | 14.97    | 1148.402 |
| 1148.402 | 14.99   | 1148.402 | 14.89517 | 1148.401 | 14.95193 | 1148.402 | 14.97384 | 1148.402 |
| 1148.402 | 14.9958 | 1148.402 | 14.9     | 1148.401 | 14.96    | 1148.402 | 14.98    | 1148.402 |
| 1148.402 | 15      | 1148.402 | 14.90517 | 1148.401 | 14.96193 | 1148.402 | 14.98384 | 1148.402 |
| 1148.402 | 15.0058 | 1148.402 | 14.91    | 1148.402 | 14.97    | 1148.402 | 14.99    | 1148.402 |
| 1148.402 | 15.01   | 1148.402 | 14.91517 | 1148.402 | 14.97193 | 1148.402 | 14.99384 | 1148.402 |
| 1148.402 | 15.0158 | 1148.402 | 14.92    | 1148.402 | 14.98    | 1148.402 | 15       | 1148.402 |
| 1148.402 | 15.02   | 1148.402 | 14.92517 | 1148.402 | 14.98193 | 1148.402 | 15.00384 | 1148.402 |
| 1148.402 | 15.0258 | 1148.402 | 14.93    | 1148.402 | 14.99    | 1148.402 | 15.01    | 1148.402 |
| 1148.402 | 15.03   | 1148.402 | 14.93517 | 1148.402 | 14.99193 | 1148.402 | 15.01384 | 1148.402 |
| 1148.402 | 15.0358 | 1148.402 | 14.94    | 1148.402 | 15       | 1148.402 | 15.02    | 1148.402 |
| 1148.402 | 15.04   | 1148.402 | 14.94517 | 1148.402 | 15.00193 | 1148.402 | 15.02384 | 1148.402 |
| 1148.402 | 15.0458 | 1148.402 | 14.95    | 1148.402 | 15.01    | 1148.402 | 15.03    | 1148.402 |
| 1148.402 | 15.05   | 1148.402 | 14.95517 | 1148.402 | 15.01193 | 1148.402 | 15.03384 | 1148.402 |
| 1148.402 | 15.0558 | 1148.402 | 14.96    | 1148.402 | 15.02    | 1148.402 | 15.04    | 1148.402 |
| 1148.402 | 15.06   | 1148.402 | 14.96517 | 1148.402 | 15.02193 | 1148.402 | 15.04384 | 1148.402 |
| 1148.402 | 15.0658 | 1148.402 | 14.97    | 1148.402 | 15.03    | 1148.402 | 15.05    | 1148.402 |
| 1148.402 | 15.07   | 1148.402 | 14.97517 | 1148.402 | 15.03193 | 1148.402 | 15.05384 | 1148.402 |
| 1148.402 | 15.0758 | 1148.402 | 14.98    | 1148.402 | 15.04    | 1148.402 | 15.06    | 1148.402 |
| 1148.402 | 15.08   | 1148.402 | 14.98517 | 1148.402 | 15.04193 | 1148.402 | 15.06384 | 1148.402 |
| 1148.402 | 15.0858 | 1148.402 | 14.99    | 1148.402 | 15.05    | 1148.402 | 15.07    | 1148.402 |
| 1148.402 | 15.09   | 1148.402 | 14.99517 | 1148.402 | 15.05193 | 1148.402 | 15.07384 | 1148.402 |
| 1148.402 | 15.0958 | 1148.402 | 15       | 1148.402 | 15.06    | 1148.402 | 15.08    | 1148.402 |
| 1148.402 | 15.1    | 1148.402 | 15.00517 | 1148.402 | 15.06193 | 1148.402 | 15.08384 | 1148.402 |
| 1148.402 | 15.1058 | 1148.402 | 15.01    | 1148.402 | 15.07    | 1148.402 | 15.09    | 1148.402 |
| 1148.402 | 15.11   | 1148.402 | 15.01517 | 1148.402 | 15.07193 | 1148.402 | 15.09384 | 1148.402 |
| 1148.402 | 15.1158 | 1148.402 | 15.02    | 1148.402 | 15.08    | 1148.402 | 15.1     | 1148.402 |
| 1148.402 | 15.12   | 1148.402 | 15.02517 | 1148.402 | 15.08193 | 1148.402 | 15.10384 | 1148.402 |
| 1148.402 | 15.1258 | 1148.402 | 15.03    | 1148.402 | 15.09    | 1148.402 | 15.11    | 1148.402 |
| 1148.402 | 15.13   | 1148.402 | 15.03517 | 1148.402 | 15.09193 | 1148.402 | 15.11384 | 1148.402 |
| 1148.402 | 15.1358 | 1148.402 | 15.04    | 1148.402 | 15.1     | 1148.402 | 15.12    | 1148.402 |
| 1148.402 | 15.14   | 1148.402 | 15.04517 | 1148.402 | 15.10193 | 1148.402 | 15.12384 | 1148.402 |
| 1148.402 | 15.1458 | 1148.402 | 15.05    | 1148.402 | 15.11    | 1148.402 | 15.13    | 1148.402 |
| 1148.402 | 15.15   | 1148.402 | 15.05517 | 1148.402 | 15.11193 | 1148.402 | 15.13384 | 1148.402 |
| 1148.402 | 15.1558 | 1148.402 | 15.06    | 1148.402 | 15.12    | 1148.402 | 15.14    | 1148.402 |
| 1148.402 | 15.16   | 1148.402 | 15.06517 | 1148.402 | 15.12193 | 1148.402 | 15.14384 | 1148.402 |
| 1148.402 | 15.1658 | 1148.402 | 15.07    | 1148.402 | 15.13    | 1148.402 | 15.15    | 1148.402 |
| 1148.402 | 15.17   | 1148.402 | 15.07517 | 1148.402 | 15.13193 | 1148.402 | 15.15384 | 1148.402 |
| 1148.402 | 15.1758 | 1148.402 | 15.08    | 1148.402 | 15.14    | 1148.402 | 15.16    | 1148.402 |
| 1148.402 | 15.18   | 1148.402 | 15.08517 | 1148.402 | 15.14193 | 1148.402 | 15.16384 | 1148.402 |
| 1148.402 | 15.1858 | 1148.402 | 15.09    | 1148.402 | 15.15    | 1148.402 | 15.17    | 1148.402 |

|          |         |          |          |          |          |          |          |          |
|----------|---------|----------|----------|----------|----------|----------|----------|----------|
| 1148.402 | 15.19   | 1148.402 | 15.09517 | 1148.402 | 15.15193 | 1148.402 | 15.17384 | 1148.402 |
| 1148.402 | 15.1958 | 1148.402 | 15.1     | 1148.402 | 15.16    | 1148.402 | 15.18    | 1148.402 |
| 1148.402 | 15.2    | 1148.402 | 15.10517 | 1148.402 | 15.16193 | 1148.402 | 15.18384 | 1148.402 |
| 1148.402 | 15.2058 | 1148.402 | 15.11    | 1148.402 | 15.17    | 1148.402 | 15.19    | 1148.402 |
| 1148.402 | 15.21   | 1148.402 | 15.11517 | 1148.402 | 15.17193 | 1148.402 | 15.19384 | 1148.402 |
| 1148.402 | 15.2158 | 1148.402 | 15.12    | 1148.402 | 15.18    | 1148.402 | 15.2     | 1148.402 |
| 1148.402 | 15.22   | 1148.402 | 15.12517 | 1148.402 | 15.18193 | 1148.402 | 15.20384 | 1148.402 |
| 1148.402 | 15.2258 | 1148.402 | 15.13    | 1148.402 | 15.19    | 1148.402 | 15.21    | 1148.402 |
| 1148.402 | 15.23   | 1148.402 | 15.13517 | 1148.402 | 15.19193 | 1148.402 | 15.21384 | 1148.402 |
| 1148.402 | 15.2358 | 1148.402 | 15.14    | 1148.402 | 15.2     | 1148.402 | 15.22    | 1148.402 |
| 1148.402 | 15.24   | 1148.402 | 15.14517 | 1148.402 | 15.20193 | 1148.402 | 15.22384 | 1148.402 |
| 1148.402 | 15.2458 | 1148.402 | 15.15    | 1148.402 | 15.21    | 1148.402 | 15.23    | 1148.402 |
| 1148.402 | 15.25   | 1148.402 | 15.15517 | 1148.402 | 15.21193 | 1148.402 | 15.23384 | 1148.402 |
| 1148.402 | 15.2558 | 1148.402 | 15.16    | 1148.402 | 15.22    | 1148.402 | 15.24    | 1148.402 |
| 1148.402 | 15.26   | 1148.402 | 15.16517 | 1148.402 | 15.22193 | 1148.402 | 15.24384 | 1148.402 |
| 1148.402 | 15.2658 | 1148.402 | 15.17    | 1148.402 | 15.23    | 1148.402 | 15.25    | 1148.402 |
| 1148.402 | 15.27   | 1148.402 | 15.17517 | 1148.402 | 15.23193 | 1148.402 | 15.25384 | 1148.402 |
| 1148.402 | 15.2758 | 1148.402 | 15.18    | 1148.402 | 15.24    | 1148.402 | 15.26    | 1148.402 |
| 1148.402 | 15.28   | 1148.402 | 15.18517 | 1148.402 | 15.24193 | 1148.402 | 15.26384 | 1148.402 |
| 1148.402 | 15.2858 | 1148.402 | 15.19    | 1148.402 | 15.25    | 1148.402 | 15.27    | 1148.402 |
| 1148.402 | 15.29   | 1148.402 | 15.19517 | 1148.402 | 15.25193 | 1148.402 | 15.27384 | 1148.402 |
| 1148.402 | 15.2958 | 1148.402 | 15.2     | 1148.402 | 15.26    | 1148.402 | 15.28    | 1148.402 |
| 1148.402 | 15.3    | 1148.402 | 15.20517 | 1148.402 | 15.26193 | 1148.402 | 15.28384 | 1148.402 |
| 1148.402 | 15.3058 | 1148.402 | 15.21    | 1148.402 | 15.27    | 1148.402 | 15.29    | 1148.402 |
| 1148.402 | 15.31   | 1148.402 | 15.21517 | 1148.402 | 15.27193 | 1148.402 | 15.29384 | 1148.402 |
| 1148.402 | 15.3158 | 1148.402 | 15.22    | 1148.402 | 15.28    | 1148.402 | 15.3     | 1148.402 |
| 1148.402 | 15.32   | 1148.402 | 15.22517 | 1148.402 | 15.28193 | 1148.402 | 15.30384 | 1148.402 |
| 1148.402 | 15.3258 | 1148.402 | 15.23    | 1148.402 | 15.29    | 1148.402 | 15.31    | 1148.402 |
| 1148.402 | 15.33   | 1148.402 | 15.23517 | 1148.402 | 15.29193 | 1148.402 | 15.31384 | 1148.402 |
| 1148.402 | 15.3358 | 1148.402 | 15.24    | 1148.402 | 15.3     | 1148.402 | 15.32    | 1148.402 |
| 1148.402 | 15.34   | 1148.402 | 15.24517 | 1148.402 | 15.30193 | 1148.402 | 15.32384 | 1148.402 |
| 1148.402 | 15.3458 | 1148.402 | 15.25    | 1148.402 | 15.31    | 1148.402 | 15.33    | 1148.402 |
| 1148.402 | 15.35   | 1148.402 | 15.25517 | 1148.402 | 15.31193 | 1148.402 | 15.33384 | 1148.402 |
| 1148.402 | 15.3558 | 1148.402 | 15.26    | 1148.402 | 15.32    | 1148.402 | 15.34    | 1148.402 |
| 1148.402 | 15.36   | 1148.402 | 15.26517 | 1148.402 | 15.32193 | 1148.402 | 15.34384 | 1148.402 |
| 1148.402 | 15.3658 | 1148.402 | 15.27    | 1148.402 | 15.33    | 1148.402 | 15.35    | 1148.402 |
| 1148.402 | 15.37   | 1148.402 | 15.27517 | 1148.402 | 15.33193 | 1148.402 | 15.35384 | 1148.402 |
| 1148.402 | 15.3758 | 1148.402 | 15.28    | 1148.402 | 15.34    | 1148.402 | 15.36    | 1148.402 |
| 1148.402 | 15.38   | 1148.402 | 15.28517 | 1148.402 | 15.34193 | 1148.402 | 15.36384 | 1148.402 |
| 1148.402 | 15.3858 | 1148.402 | 15.29    | 1148.402 | 15.35    | 1148.402 | 15.37    | 1148.402 |
| 1148.402 | 15.39   | 1148.402 | 15.29517 | 1148.402 | 15.35193 | 1148.402 | 15.37384 | 1148.402 |
| 1148.402 | 15.3958 | 1148.402 | 15.3     | 1148.402 | 15.36    | 1148.402 | 15.38    | 1148.402 |
| 1148.402 | 15.4    | 1148.402 | 15.30517 | 1148.402 | 15.36193 | 1148.402 | 15.38384 | 1148.402 |
| 1148.402 | 15.4058 | 1148.402 | 15.31    | 1148.402 | 15.37    | 1148.402 | 15.39    | 1148.402 |
| 1148.402 | 15.41   | 1148.402 | 15.31517 | 1148.402 | 15.37193 | 1148.402 | 15.39384 | 1148.402 |
| 1148.402 | 15.4158 | 1148.402 | 15.32    | 1148.402 | 15.38    | 1148.402 | 15.4     | 1148.402 |
| 1148.402 | 15.42   | 1148.402 | 15.32517 | 1148.402 | 15.38193 | 1148.402 | 15.40384 | 1148.402 |

|          |         |          |          |          |          |          |          |          |
|----------|---------|----------|----------|----------|----------|----------|----------|----------|
| 1148.402 | 15.4258 | 1148.402 | 15.33    | 1148.402 | 15.39    | 1148.402 | 15.41    | 1148.402 |
| 1148.402 | 15.43   | 1148.402 | 15.33517 | 1148.402 | 15.39193 | 1148.402 | 15.41384 | 1148.402 |
| 1148.402 | 15.4358 | 1148.402 | 15.34    | 1148.402 | 15.4     | 1148.402 | 15.42    | 1148.402 |
| 1148.402 | 15.44   | 1148.402 | 15.34517 | 1148.402 | 15.40193 | 1148.402 | 15.42384 | 1148.402 |
| 1148.402 | 15.4458 | 1148.402 | 15.35    | 1148.402 | 15.41    | 1148.402 | 15.43    | 1148.402 |
| 1148.402 | 15.45   | 1148.402 | 15.35517 | 1148.402 | 15.41193 | 1148.402 | 15.43384 | 1148.402 |
| 1148.402 | 15.4558 | 1148.402 | 15.36    | 1148.402 | 15.42    | 1148.402 | 15.44    | 1148.402 |
| 1148.403 | 15.46   | 1148.402 | 15.36517 | 1148.402 | 15.42193 | 1148.402 | 15.44384 | 1148.402 |
| 1148.403 | 15.4658 | 1148.402 | 15.37    | 1148.402 | 15.43    | 1148.402 | 15.45    | 1148.402 |
| 1148.403 | 15.47   | 1148.402 | 15.37517 | 1148.402 | 15.43193 | 1148.402 | 15.45384 | 1148.402 |
| 1148.403 | 15.4758 | 1148.402 | 15.38    | 1148.402 | 15.44    | 1148.402 | 15.46    | 1148.402 |
| 1148.403 | 15.48   | 1148.402 | 15.38517 | 1148.402 | 15.44193 | 1148.402 | 15.46384 | 1148.402 |
| 1148.403 | 15.4858 | 1148.402 | 15.39    | 1148.402 | 15.45    | 1148.402 | 15.47    | 1148.402 |
| 1148.403 | 15.49   | 1148.402 | 15.39517 | 1148.402 | 15.45193 | 1148.402 | 15.47384 | 1148.402 |
| 1148.403 | 15.4958 | 1148.402 | 15.4     | 1148.402 | 15.46    | 1148.402 | 15.48    | 1148.402 |
| 1148.403 | 15.5    | 1148.402 | 15.40517 | 1148.402 | 15.46193 | 1148.402 | 15.48384 | 1148.402 |
| 1148.403 | 15.5058 | 1148.402 | 15.41    | 1148.402 | 15.47    | 1148.402 | 15.49    | 1148.402 |
| 1148.403 | 15.51   | 1148.403 | 15.41517 | 1148.402 | 15.47193 | 1148.402 | 15.49384 | 1148.402 |
| 1148.403 | 15.5158 | 1148.403 | 15.42    | 1148.402 | 15.48    | 1148.402 | 15.5     | 1148.402 |
| 1148.403 | 15.52   | 1148.403 | 15.42517 | 1148.402 | 15.48193 | 1148.402 | 15.50384 | 1148.402 |
| 1148.403 | 15.5258 | 1148.403 | 15.43    | 1148.402 | 15.49    | 1148.402 | 15.51    | 1148.402 |
| 1148.403 | 15.53   | 1148.403 | 15.43517 | 1148.402 | 15.49193 | 1148.402 | 15.51384 | 1148.402 |
| 1148.403 | 15.5358 | 1148.403 | 15.44    | 1148.402 | 15.5     | 1148.402 | 15.52    | 1148.403 |
| 1148.403 | 15.54   | 1148.403 | 15.44517 | 1148.402 | 15.50193 | 1148.402 | 15.52384 | 1148.403 |
| 1148.403 | 15.5458 | 1148.403 | 15.45    | 1148.402 | 15.51    | 1148.402 | 15.53    | 1148.403 |
| 1148.403 | 15.55   | 1148.403 | 15.45517 | 1148.402 | 15.51193 | 1148.402 | 15.53384 | 1148.403 |
| 1148.403 | 15.5558 | 1148.403 | 15.46    | 1148.402 | 15.52    | 1148.402 | 15.54    | 1148.403 |
| 1148.403 | 15.56   | 1148.403 | 15.46517 | 1148.402 | 15.52193 | 1148.402 | 15.54384 | 1148.403 |
| 1148.403 | 15.5658 | 1148.403 | 15.47    | 1148.402 | 15.53    | 1148.403 | 15.55    | 1148.403 |
| 1148.403 | 15.57   | 1148.403 | 15.47517 | 1148.402 | 15.53193 | 1148.403 | 15.55384 | 1148.403 |
| 1148.403 | 15.5758 | 1148.403 | 15.48    | 1148.402 | 15.54    | 1148.403 | 15.56    | 1148.403 |
| 1148.403 | 15.58   | 1148.403 | 15.48517 | 1148.402 | 15.54193 | 1148.403 | 15.56384 | 1148.403 |
| 1148.403 | 15.5858 | 1148.403 | 15.49    | 1148.402 | 15.55    | 1148.403 | 15.57    | 1148.403 |
| 1148.403 | 15.59   | 1148.403 | 15.49517 | 1148.402 | 15.55193 | 1148.403 | 15.57384 | 1148.403 |
| 1148.403 | 15.5958 | 1148.403 | 15.5     | 1148.402 | 15.56    | 1148.403 | 15.58    | 1148.403 |
| 1148.403 | 15.6    | 1148.403 | 15.50517 | 1148.402 | 15.56193 | 1148.403 | 15.58384 | 1148.403 |
| 1148.403 | 15.6058 | 1148.403 | 15.51    | 1148.403 | 15.57    | 1148.403 | 15.59    | 1148.403 |
| 1148.403 | 15.61   | 1148.403 | 15.51517 | 1148.403 | 15.57193 | 1148.403 | 15.59384 | 1148.403 |
| 1148.403 | 15.6158 | 1148.403 | 15.52    | 1148.403 | 15.58    | 1148.403 | 15.6     | 1148.403 |
| 1148.403 | 15.62   | 1148.403 | 15.52517 | 1148.403 | 15.58193 | 1148.403 | 15.60384 | 1148.403 |
| 1148.403 | 15.6258 | 1148.403 | 15.53    | 1148.403 | 15.59    | 1148.403 | 15.61    | 1148.403 |
| 1148.403 | 15.63   | 1148.403 | 15.53517 | 1148.403 | 15.59193 | 1148.403 | 15.61384 | 1148.403 |
| 1148.403 | 15.6358 | 1148.403 | 15.54    | 1148.403 | 15.6     | 1148.403 | 15.62    | 1148.403 |
| 1148.403 | 15.64   | 1148.403 | 15.54517 | 1148.403 | 15.60193 | 1148.403 | 15.62384 | 1148.403 |
| 1148.403 | 15.6458 | 1148.403 | 15.55    | 1148.403 | 15.61    | 1148.403 | 15.63    | 1148.403 |
| 1148.403 | 15.65   | 1148.403 | 15.55517 | 1148.403 | 15.61193 | 1148.403 | 15.63384 | 1148.403 |
| 1148.403 | 15.6558 | 1148.403 | 15.56    | 1148.403 | 15.62    | 1148.403 | 15.64    | 1148.403 |

|          |         |          |          |          |          |          |          |          |
|----------|---------|----------|----------|----------|----------|----------|----------|----------|
| 1148.403 | 15.66   | 1148.403 | 15.56517 | 1148.403 | 15.62193 | 1148.403 | 15.64384 | 1148.403 |
| 1148.403 | 15.6658 | 1148.403 | 15.57    | 1148.403 | 15.63    | 1148.403 | 15.65    | 1148.403 |
| 1148.403 | 15.67   | 1148.403 | 15.57517 | 1148.403 | 15.63193 | 1148.403 | 15.65384 | 1148.403 |
| 1148.403 | 15.6758 | 1148.403 | 15.58    | 1148.403 | 15.64    | 1148.403 | 15.66    | 1148.403 |
| 1148.403 | 15.68   | 1148.403 | 15.58517 | 1148.403 | 15.64193 | 1148.403 | 15.66384 | 1148.403 |
| 1148.403 | 15.6858 | 1148.403 | 15.59    | 1148.403 | 15.65    | 1148.403 | 15.67    | 1148.403 |
| 1148.403 | 15.69   | 1148.403 | 15.59517 | 1148.403 | 15.65193 | 1148.403 | 15.67384 | 1148.403 |
| 1148.403 | 15.6958 | 1148.403 | 15.6     | 1148.403 | 15.66    | 1148.403 | 15.68    | 1148.403 |
| 1148.403 | 15.7    | 1148.403 | 15.60517 | 1148.403 | 15.66193 | 1148.403 | 15.68384 | 1148.403 |
| 1148.403 | 15.7058 | 1148.403 | 15.61    | 1148.403 | 15.67    | 1148.403 | 15.69    | 1148.403 |
| 1148.403 | 15.71   | 1148.403 | 15.61517 | 1148.403 | 15.67193 | 1148.403 | 15.69384 | 1148.403 |
| 1148.403 | 15.7158 | 1148.403 | 15.62    | 1148.403 | 15.68    | 1148.403 | 15.7     | 1148.403 |
| 1148.403 | 15.72   | 1148.403 | 15.62517 | 1148.403 | 15.68193 | 1148.403 | 15.70384 | 1148.403 |
| 1148.403 | 15.7258 | 1148.403 | 15.63    | 1148.403 | 15.69    | 1148.403 | 15.71    | 1148.403 |
| 1148.403 | 15.73   | 1148.403 | 15.63517 | 1148.403 | 15.69193 | 1148.403 | 15.71384 | 1148.403 |
| 1148.403 | 15.7358 | 1148.403 | 15.64    | 1148.403 | 15.7     | 1148.403 | 15.72    | 1148.403 |
| 1148.403 | 15.74   | 1148.403 | 15.64517 | 1148.403 | 15.70193 | 1148.403 | 15.72384 | 1148.403 |
| 1148.403 | 15.7458 | 1148.403 | 15.65    | 1148.403 | 15.71    | 1148.403 | 15.73    | 1148.403 |
| 1148.403 | 15.75   | 1148.403 | 15.65517 | 1148.403 | 15.71193 | 1148.403 | 15.73384 | 1148.403 |
| 1148.403 | 15.7558 | 1148.403 | 15.66    | 1148.403 | 15.72    | 1148.403 | 15.74    | 1148.403 |
| 1148.403 | 15.76   | 1148.403 | 15.66517 | 1148.403 | 15.72193 | 1148.403 | 15.74384 | 1148.403 |
| 1148.403 | 15.7658 | 1148.403 | 15.67    | 1148.403 | 15.73    | 1148.403 | 15.75    | 1148.403 |
| 1148.403 | 15.77   | 1148.403 | 15.67517 | 1148.403 | 15.73193 | 1148.403 | 15.75384 | 1148.403 |
| 1148.403 | 15.7758 | 1148.403 | 15.68    | 1148.403 | 15.74    | 1148.403 | 15.76    | 1148.403 |
| 1148.403 | 15.78   | 1148.403 | 15.68517 | 1148.403 | 15.74193 | 1148.403 | 15.76384 | 1148.403 |
| 1148.403 | 15.7858 | 1148.403 | 15.69    | 1148.403 | 15.75    | 1148.403 | 15.77    | 1148.403 |
| 1148.403 | 15.79   | 1148.403 | 15.69517 | 1148.403 | 15.75193 | 1148.403 | 15.77384 | 1148.403 |
| 1148.403 | 15.7958 | 1148.403 | 15.7     | 1148.403 | 15.76    | 1148.403 | 15.78    | 1148.403 |
| 1148.403 | 15.8    | 1148.403 | 15.70517 | 1148.403 | 15.76193 | 1148.403 | 15.78384 | 1148.403 |
| 1148.403 | 15.8058 | 1148.403 | 15.71    | 1148.403 | 15.77    | 1148.403 | 15.79    | 1148.403 |
| 1148.403 | 15.81   | 1148.403 | 15.71517 | 1148.403 | 15.77193 | 1148.403 | 15.79384 | 1148.403 |
| 1148.403 | 15.8158 | 1148.403 | 15.72    | 1148.403 | 15.78    | 1148.403 | 15.8     | 1148.403 |
| 1148.403 | 15.82   | 1148.403 | 15.72517 | 1148.403 | 15.78193 | 1148.403 | 15.80384 | 1148.403 |
| 1148.403 | 15.8258 | 1148.403 | 15.73    | 1148.403 | 15.79    | 1148.403 | 15.81    | 1148.403 |
| 1148.403 | 15.83   | 1148.403 | 15.73517 | 1148.403 | 15.79193 | 1148.403 | 15.81384 | 1148.403 |
| 1148.403 | 15.8358 | 1148.403 | 15.74    | 1148.403 | 15.8     | 1148.403 | 15.82    | 1148.403 |
| 1148.403 | 15.84   | 1148.403 | 15.74517 | 1148.403 | 15.80193 | 1148.403 | 15.82384 | 1148.403 |
| 1148.403 | 15.8458 | 1148.403 | 15.75    | 1148.403 | 15.81    | 1148.403 | 15.83    | 1148.403 |
| 1148.403 | 15.85   | 1148.403 | 15.75517 | 1148.403 | 15.81193 | 1148.403 | 15.83384 | 1148.403 |
| 1148.403 | 15.8558 | 1148.403 | 15.76    | 1148.403 | 15.82    | 1148.403 | 15.84    | 1148.403 |
| 1148.403 | 15.86   | 1148.403 | 15.76517 | 1148.403 | 15.82193 | 1148.403 | 15.84384 | 1148.403 |
| 1148.403 | 15.8658 | 1148.403 | 15.77    | 1148.403 | 15.83    | 1148.403 | 15.85    | 1148.403 |
| 1148.403 | 15.87   | 1148.403 | 15.77517 | 1148.403 | 15.83193 | 1148.403 | 15.85384 | 1148.403 |
| 1148.403 | 15.8758 | 1148.403 | 15.78    | 1148.403 | 15.84    | 1148.403 | 15.86    | 1148.403 |
| 1148.403 | 15.88   | 1148.403 | 15.78517 | 1148.403 | 15.84193 | 1148.403 | 15.86384 | 1148.403 |
| 1148.403 | 15.8858 | 1148.403 | 15.79    | 1148.403 | 15.85    | 1148.403 | 15.87    | 1148.403 |
| 1148.403 | 15.89   | 1148.403 | 15.79517 | 1148.403 | 15.85193 | 1148.403 | 15.87384 | 1148.403 |

|          |         |          |          |          |          |          |          |          |
|----------|---------|----------|----------|----------|----------|----------|----------|----------|
| 1148.403 | 15.8958 | 1148.403 | 15.8     | 1148.403 | 15.86    | 1148.403 | 15.88    | 1148.403 |
| 1148.403 | 15.9    | 1148.403 | 15.80517 | 1148.403 | 15.86193 | 1148.403 | 15.88384 | 1148.403 |
| 1148.403 | 15.9058 | 1148.403 | 15.81    | 1148.403 | 15.87    | 1148.403 | 15.89    | 1148.403 |
| 1148.403 | 15.91   | 1148.403 | 15.81517 | 1148.403 | 15.87193 | 1148.403 | 15.89384 | 1148.403 |
| 1148.403 | 15.9158 | 1148.403 | 15.82    | 1148.403 | 15.88    | 1148.403 | 15.9     | 1148.403 |
| 1148.403 | 15.92   | 1148.403 | 15.82517 | 1148.403 | 15.88193 | 1148.403 | 15.90384 | 1148.403 |
| 1148.403 | 15.9258 | 1148.403 | 15.83    | 1148.403 | 15.89    | 1148.403 | 15.91    | 1148.403 |
| 1148.403 | 15.93   | 1148.403 | 15.83517 | 1148.403 | 15.89193 | 1148.403 | 15.91384 | 1148.403 |
| 1148.403 | 15.9358 | 1148.403 | 15.84    | 1148.403 | 15.9     | 1148.403 | 15.92    | 1148.403 |
| 1148.403 | 15.94   | 1148.403 | 15.84517 | 1148.403 | 15.90193 | 1148.403 | 15.92384 | 1148.403 |
| 1148.403 | 15.9458 | 1148.403 | 15.85    | 1148.403 | 15.91    | 1148.403 | 15.93    | 1148.403 |
| 1148.403 | 15.95   | 1148.403 | 15.85517 | 1148.403 | 15.91193 | 1148.403 | 15.93384 | 1148.403 |
| 1148.403 | 15.9558 | 1148.403 | 15.86    | 1148.403 | 15.92    | 1148.403 | 15.94    | 1148.403 |
| 1148.403 | 15.96   | 1148.403 | 15.86517 | 1148.403 | 15.92193 | 1148.403 | 15.94384 | 1148.403 |
| 1148.403 | 15.9658 | 1148.403 | 15.87    | 1148.403 | 15.93    | 1148.403 | 15.95    | 1148.403 |
| 1148.403 | 15.97   | 1148.403 | 15.87517 | 1148.403 | 15.93193 | 1148.403 | 15.95384 | 1148.403 |
| 1148.403 | 15.9758 | 1148.403 | 15.88    | 1148.403 | 15.94    | 1148.403 | 15.96    | 1148.403 |
| 1148.403 | 15.98   | 1148.403 | 15.88517 | 1148.403 | 15.94193 | 1148.403 | 15.96384 | 1148.403 |
| 1148.403 | 15.9858 | 1148.403 | 15.89    | 1148.403 | 15.95    | 1148.403 | 15.97    | 1148.403 |
| 1148.403 | 15.99   | 1148.403 | 15.89517 | 1148.403 | 15.95193 | 1148.403 | 15.97384 | 1148.403 |
| 1148.403 | 15.9958 | 1148.403 | 15.9     | 1148.403 | 15.96    | 1148.403 | 15.98    | 1148.403 |
| 1148.403 | 16      | 1148.403 | 15.90517 | 1148.403 | 15.96193 | 1148.403 | 15.98384 | 1148.403 |
| 1148.403 | 16.0058 | 1148.403 | 15.91    | 1148.403 | 15.97    | 1148.403 | 15.99    | 1148.403 |
| 1148.403 | 16.01   | 1148.403 | 15.91517 | 1148.403 | 15.97193 | 1148.403 | 15.99384 | 1148.403 |
| 1148.403 | 16.0158 | 1148.403 | 15.92    | 1148.403 | 15.98    | 1148.403 | 16       | 1148.403 |
| 1148.403 | 16.02   | 1148.403 | 15.92517 | 1148.403 | 15.98193 | 1148.403 | 16.00384 | 1148.403 |
| 1148.403 | 16.0258 | 1148.403 | 15.93    | 1148.403 | 15.99    | 1148.403 | 16.01    | 1148.403 |
| 1148.403 | 16.03   | 1148.403 | 15.93517 | 1148.403 | 15.99193 | 1148.403 | 16.01384 | 1148.403 |
| 1148.403 | 16.0358 | 1148.403 | 15.94    | 1148.403 | 16       | 1148.403 | 16.02    | 1148.403 |
| 1148.403 | 16.04   | 1148.403 | 15.94517 | 1148.403 | 16.00193 | 1148.403 | 16.02384 | 1148.403 |
| 1148.403 | 16.0458 | 1148.403 | 15.95    | 1148.403 | 16.01    | 1148.403 | 16.03    | 1148.403 |
| 1148.403 | 16.05   | 1148.403 | 15.95517 | 1148.403 | 16.01193 | 1148.403 | 16.03384 | 1148.403 |
| 1148.403 | 16.0558 | 1148.403 | 15.96    | 1148.403 | 16.02    | 1148.403 | 16.04    | 1148.403 |
| 1148.403 | 16.06   | 1148.403 | 15.96517 | 1148.403 | 16.02193 | 1148.403 | 16.04384 | 1148.403 |
| 1148.403 | 16.0658 | 1148.403 | 15.97    | 1148.403 | 16.03    | 1148.403 | 16.05    | 1148.403 |
| 1148.403 | 16.07   | 1148.403 | 15.97517 | 1148.403 | 16.03193 | 1148.403 | 16.05384 | 1148.403 |
| 1148.403 | 16.0758 | 1148.403 | 15.98    | 1148.403 | 16.04    | 1148.403 | 16.06    | 1148.403 |
| 1148.403 | 16.08   | 1148.403 | 15.98517 | 1148.403 | 16.04193 | 1148.403 | 16.06384 | 1148.403 |
| 1148.403 | 16.0858 | 1148.403 | 15.99    | 1148.403 | 16.05    | 1148.403 | 16.07    | 1148.403 |
| 1148.403 | 16.09   | 1148.403 | 15.99517 | 1148.403 | 16.05193 | 1148.403 | 16.07384 | 1148.403 |
| 1148.403 | 16.0958 | 1148.403 | 16       | 1148.403 | 16.06    | 1148.403 | 16.08    | 1148.403 |
| 1148.403 | 16.1    | 1148.403 | 16.00517 | 1148.403 | 16.06193 | 1148.403 | 16.08384 | 1148.403 |
| 1148.403 | 16.1058 | 1148.403 | 16.01    | 1148.403 | 16.07    | 1148.403 | 16.09    | 1148.403 |
| 1148.403 | 16.11   | 1148.403 | 16.01517 | 1148.403 | 16.07193 | 1148.403 | 16.09384 | 1148.403 |
| 1148.403 | 16.1158 | 1148.403 | 16.02    | 1148.403 | 16.08    | 1148.403 | 16.1     | 1148.403 |
| 1148.403 | 16.12   | 1148.403 | 16.02517 | 1148.403 | 16.08193 | 1148.403 | 16.10384 | 1148.403 |
| 1148.403 | 16.1258 | 1148.403 | 16.03    | 1148.403 | 16.09    | 1148.403 | 16.11    | 1148.403 |



|          |         |          |          |          |          |          |          |          |
|----------|---------|----------|----------|----------|----------|----------|----------|----------|
| 1148.403 | 16.13   | 1148.403 | 16.03517 | 1148.403 | 16.09193 | 1148.403 | 16.11384 | 1148.403 |
| 1148.403 | 16.1358 | 1148.403 | 16.04    | 1148.403 | 16.1     | 1148.403 | 16.12    | 1148.403 |
| 1148.403 | 16.14   | 1148.403 | 16.04517 | 1148.403 | 16.10193 | 1148.403 | 16.12384 | 1148.403 |
| 1148.403 | 16.1458 | 1148.403 | 16.05    | 1148.403 | 16.11    | 1148.403 | 16.13    | 1148.403 |
| 1148.403 | 16.15   | 1148.403 | 16.05517 | 1148.403 | 16.11193 | 1148.403 | 16.13384 | 1148.403 |
| 1148.403 | 16.1558 | 1148.403 | 16.06    | 1148.403 | 16.12    | 1148.403 | 16.14    | 1148.403 |
| 1148.403 | 16.16   | 1148.403 | 16.06517 | 1148.403 | 16.12193 | 1148.403 | 16.14384 | 1148.403 |
| 1148.403 | 16.1658 | 1148.403 | 16.07    | 1148.403 | 16.13    | 1148.403 | 16.15    | 1148.403 |
| 1148.403 | 16.17   | 1148.403 | 16.07517 | 1148.403 | 16.13193 | 1148.403 | 16.15384 | 1148.403 |
| 1148.403 | 16.1758 | 1148.403 | 16.08    | 1148.403 | 16.14    | 1148.403 | 16.16    | 1148.403 |
| 1148.403 | 16.18   | 1148.403 | 16.08517 | 1148.403 | 16.14193 | 1148.403 | 16.16384 | 1148.403 |
| 1148.403 | 16.1858 | 1148.403 | 16.09    | 1148.403 | 16.15    | 1148.403 | 16.17    | 1148.403 |
| 1148.403 | 16.19   | 1148.403 | 16.09517 | 1148.403 | 16.15193 | 1148.403 | 16.17384 | 1148.403 |
| 1148.403 | 16.1958 | 1148.403 | 16.1     | 1148.403 | 16.16    | 1148.403 | 16.18    | 1148.403 |
| 1148.403 | 16.2    | 1148.403 | 16.10517 | 1148.403 | 16.16193 | 1148.403 | 16.18384 | 1148.403 |
| 1148.403 | 16.2058 | 1148.403 | 16.11    | 1148.403 | 16.17    | 1148.403 | 16.19    | 1148.403 |
| 1148.403 | 16.21   | 1148.403 | 16.11517 | 1148.403 | 16.17193 | 1148.403 | 16.19384 | 1148.403 |
| 1148.403 | 16.2158 | 1148.403 | 16.12    | 1148.403 | 16.18    | 1148.403 | 16.2     | 1148.403 |
| 1148.403 | 16.22   | 1148.403 | 16.12517 | 1148.403 | 16.18193 | 1148.403 | 16.20384 | 1148.403 |
| 1148.403 | 16.2258 | 1148.403 | 16.13    | 1148.403 | 16.19    | 1148.403 | 16.21    | 1148.403 |
| 1148.403 | 16.23   | 1148.403 | 16.13517 | 1148.403 | 16.19193 | 1148.403 | 16.21384 | 1148.403 |
| 1148.403 | 16.2358 | 1148.403 | 16.14    | 1148.403 | 16.2     | 1148.403 | 16.22    | 1148.403 |
| 1148.403 | 16.24   | 1148.403 | 16.14517 | 1148.403 | 16.20193 | 1148.403 | 16.22384 | 1148.403 |
| 1148.403 | 16.2458 | 1148.403 | 16.15    | 1148.403 | 16.21    | 1148.403 | 16.23    | 1148.403 |
| 1148.403 | 16.25   | 1148.403 | 16.15517 | 1148.403 | 16.21193 | 1148.403 | 16.23384 | 1148.403 |
| 1148.403 | 16.2558 | 1148.403 | 16.16    | 1148.403 | 16.22    | 1148.403 | 16.24    | 1148.403 |
| 1148.403 | 16.26   | 1148.403 | 16.16517 | 1148.403 | 16.22193 | 1148.403 | 16.24384 | 1148.403 |
| 1148.403 | 16.2658 | 1148.403 | 16.17    | 1148.403 | 16.23    | 1148.403 | 16.25    | 1148.403 |
| 1148.403 | 16.27   | 1148.403 | 16.17517 | 1148.403 | 16.23193 | 1148.403 | 16.25384 | 1148.403 |
| 1148.403 | 16.2758 | 1148.403 | 16.18    | 1148.403 | 16.24    | 1148.403 | 16.26    | 1148.403 |
| 1148.403 | 16.28   | 1148.403 | 16.18517 | 1148.403 | 16.24193 | 1148.403 | 16.26384 | 1148.403 |
| 1148.403 | 16.2858 | 1148.403 | 16.19    | 1148.403 | 16.25    | 1148.403 | 16.27    | 1148.403 |
| 1148.403 | 16.29   | 1148.403 | 16.19517 | 1148.403 | 16.25193 | 1148.403 | 16.27384 | 1148.403 |
| 1148.403 | 16.2958 | 1148.403 | 16.2     | 1148.403 | 16.26    | 1148.403 | 16.28    | 1148.403 |
| 1148.403 | 16.3    | 1148.403 | 16.20517 | 1148.403 | 16.26193 | 1148.403 | 16.28384 | 1148.403 |
| 1148.403 | 16.3058 | 1148.403 | 16.21    | 1148.403 | 16.27    | 1148.403 | 16.29    | 1148.403 |
| 1148.403 | 16.31   | 1148.403 | 16.21517 | 1148.403 | 16.27193 | 1148.403 | 16.29384 | 1148.403 |
| 1148.403 | 16.3158 | 1148.403 | 16.22    | 1148.403 | 16.28    | 1148.403 | 16.3     | 1148.403 |
| 1148.403 | 16.32   | 1148.403 | 16.22517 | 1148.403 | 16.28193 | 1148.403 | 16.30384 | 1148.403 |
| 1148.403 | 16.3258 | 1148.403 | 16.23    | 1148.403 | 16.29    | 1148.403 | 16.31    | 1148.403 |
| 1148.403 | 16.33   | 1148.403 | 16.23517 | 1148.403 | 16.29193 | 1148.403 | 16.31384 | 1148.403 |
| 1148.403 | 16.3358 | 1148.403 | 16.24    | 1148.403 | 16.3     | 1148.403 | 16.32    | 1148.403 |
| 1148.403 | 16.34   | 1148.403 | 16.24517 | 1148.403 | 16.30193 | 1148.403 | 16.32384 | 1148.403 |
| 1148.403 | 16.3458 | 1148.403 | 16.25    | 1148.403 | 16.31    | 1148.403 | 16.33    | 1148.403 |
| 1148.403 | 16.35   | 1148.403 | 16.25517 | 1148.403 | 16.31193 | 1148.403 | 16.33384 | 1148.403 |
| 1148.403 | 16.3558 | 1148.403 | 16.26    | 1148.403 | 16.32    | 1148.403 | 16.34    | 1148.403 |
| 1148.403 | 16.36   | 1148.403 | 16.26517 | 1148.403 | 16.32193 | 1148.403 | 16.34384 | 1148.403 |

|          |         |          |          |          |          |          |          |          |
|----------|---------|----------|----------|----------|----------|----------|----------|----------|
| 1148.403 | 16.3658 | 1148.403 | 16.27    | 1148.403 | 16.33    | 1148.403 | 16.35    | 1148.403 |
| 1148.403 | 16.37   | 1148.403 | 16.27517 | 1148.403 | 16.33193 | 1148.403 | 16.35384 | 1148.403 |
| 1148.403 | 16.3758 | 1148.403 | 16.28    | 1148.403 | 16.34    | 1148.403 | 16.36    | 1148.403 |
| 1148.403 | 16.38   | 1148.403 | 16.28517 | 1148.403 | 16.34193 | 1148.403 | 16.36384 | 1148.403 |
| 1148.403 | 16.3858 | 1148.403 | 16.29    | 1148.403 | 16.35    | 1148.403 | 16.37    | 1148.403 |
| 1148.403 | 16.39   | 1148.403 | 16.29517 | 1148.403 | 16.35193 | 1148.403 | 16.37384 | 1148.403 |
| 1148.403 | 16.3958 | 1148.403 | 16.3     | 1148.403 | 16.36    | 1148.403 | 16.38    | 1148.403 |
| 1148.403 | 16.4    | 1148.403 | 16.30517 | 1148.403 | 16.36193 | 1148.403 | 16.38384 | 1148.403 |
| 1148.403 | 16.4058 | 1148.403 | 16.31    | 1148.403 | 16.37    | 1148.403 | 16.39    | 1148.403 |
| 1148.403 | 16.41   | 1148.403 | 16.31517 | 1148.403 | 16.37193 | 1148.403 | 16.39384 | 1148.403 |
| 1148.403 | 16.4158 | 1148.403 | 16.32    | 1148.403 | 16.38    | 1148.403 | 16.4     | 1148.403 |
| 1148.403 | 16.42   | 1148.403 | 16.32517 | 1148.403 | 16.38193 | 1148.403 | 16.40384 | 1148.403 |
| 1148.403 | 16.4258 | 1148.403 | 16.33    | 1148.403 | 16.39    | 1148.403 | 16.41    | 1148.403 |
| 1148.403 | 16.43   | 1148.403 | 16.33517 | 1148.403 | 16.39193 | 1148.403 | 16.41384 | 1148.403 |
| 1148.403 | 16.4358 | 1148.403 | 16.34    | 1148.403 | 16.4     | 1148.403 | 16.42    | 1148.403 |
| 1148.403 | 16.44   | 1148.403 | 16.34517 | 1148.403 | 16.40193 | 1148.403 | 16.42384 | 1148.403 |
| 1148.403 | 16.4458 | 1148.403 | 16.35    | 1148.403 | 16.41    | 1148.403 | 16.43    | 1148.403 |
| 1148.403 | 16.45   | 1148.403 | 16.35517 | 1148.403 | 16.41193 | 1148.403 | 16.43384 | 1148.403 |
| 1148.403 | 16.4558 | 1148.403 | 16.36    | 1148.403 | 16.42    | 1148.403 | 16.44    | 1148.403 |
| 1148.403 | 16.46   | 1148.403 | 16.36517 | 1148.403 | 16.42193 | 1148.403 | 16.44384 | 1148.403 |
| 1148.403 | 16.4658 | 1148.403 | 16.37    | 1148.403 | 16.43    | 1148.403 | 16.45    | 1148.403 |
| 1148.403 | 16.47   | 1148.403 | 16.37517 | 1148.403 | 16.43193 | 1148.403 | 16.45384 | 1148.403 |
| 1148.403 | 16.4758 | 1148.403 | 16.38    | 1148.403 | 16.44    | 1148.403 | 16.46    | 1148.403 |
| 1148.403 | 16.48   | 1148.403 | 16.38517 | 1148.403 | 16.44193 | 1148.403 | 16.46384 | 1148.403 |
| 1148.403 | 16.4858 | 1148.403 | 16.39    | 1148.403 | 16.45    | 1148.403 | 16.47    | 1148.403 |
| 1148.403 | 16.49   | 1148.403 | 16.39517 | 1148.403 | 16.45193 | 1148.403 | 16.47384 | 1148.403 |
| 1148.403 | 16.4958 | 1148.403 | 16.4     | 1148.403 | 16.46    | 1148.403 | 16.48    | 1148.403 |
| 1148.403 | 16.5    | 1148.403 | 16.40517 | 1148.403 | 16.46193 | 1148.403 | 16.48384 | 1148.403 |
| 1148.403 | 16.5058 | 1148.403 | 16.41    | 1148.403 | 16.47    | 1148.403 | 16.49    | 1148.403 |
| 1148.403 | 16.51   | 1148.403 | 16.41517 | 1148.403 | 16.47193 | 1148.403 | 16.49384 | 1148.403 |
| 1148.403 | 16.5158 | 1148.403 | 16.42    | 1148.403 | 16.48    | 1148.403 | 16.5     | 1148.403 |
| 1148.403 | 16.52   | 1148.403 | 16.42517 | 1148.403 | 16.48193 | 1148.403 | 16.50384 | 1148.403 |
| 1148.403 | 16.5258 | 1148.403 | 16.43    | 1148.403 | 16.49    | 1148.403 | 16.51    | 1148.403 |
| 1148.403 | 16.53   | 1148.403 | 16.43517 | 1148.403 | 16.49193 | 1148.403 | 16.51384 | 1148.403 |
| 1148.403 | 16.5358 | 1148.403 | 16.44    | 1148.403 | 16.5     | 1148.403 | 16.52    | 1148.403 |
| 1148.403 | 16.54   | 1148.403 | 16.44517 | 1148.403 | 16.50193 | 1148.403 | 16.52384 | 1148.403 |
| 1148.403 | 16.5458 | 1148.403 | 16.45    | 1148.403 | 16.51    | 1148.403 | 16.53    | 1148.403 |
| 1148.403 | 16.55   | 1148.403 | 16.45517 | 1148.403 | 16.51193 | 1148.403 | 16.53384 | 1148.403 |
| 1148.403 | 16.5558 | 1148.403 | 16.46    | 1148.403 | 16.52    | 1148.403 | 16.54    | 1148.403 |
| 1148.403 | 16.56   | 1148.403 | 16.46517 | 1148.403 | 16.52193 | 1148.403 | 16.54384 | 1148.403 |
| 1148.403 | 16.5658 | 1148.403 | 16.47    | 1148.403 | 16.53    | 1148.403 | 16.55    | 1148.403 |
| 1148.403 | 16.57   | 1148.403 | 16.47517 | 1148.403 | 16.53193 | 1148.403 | 16.55384 | 1148.403 |
| 1148.403 | 16.5758 | 1148.403 | 16.48    | 1148.403 | 16.54    | 1148.403 | 16.56    | 1148.403 |
| 1148.403 | 16.58   | 1148.403 | 16.48517 | 1148.403 | 16.54193 | 1148.403 | 16.56384 | 1148.403 |
| 1148.403 | 16.5858 | 1148.403 | 16.49    | 1148.403 | 16.55    | 1148.403 | 16.57    | 1148.403 |
| 1148.403 | 16.59   | 1148.403 | 16.49517 | 1148.403 | 16.55193 | 1148.403 | 16.57384 | 1148.403 |
| 1148.403 | 16.5958 | 1148.403 | 16.5     | 1148.403 | 16.56    | 1148.403 | 16.58    | 1148.403 |

|          |         |          |          |          |          |          |          |          |
|----------|---------|----------|----------|----------|----------|----------|----------|----------|
| 1148.403 | 16.6    | 1148.403 | 16.50517 | 1148.403 | 16.56193 | 1148.403 | 16.58384 | 1148.403 |
| 1148.403 | 16.6058 | 1148.403 | 16.51    | 1148.403 | 16.57    | 1148.403 | 16.59    | 1148.403 |
| 1148.403 | 16.61   | 1148.403 | 16.51517 | 1148.403 | 16.57193 | 1148.403 | 16.59384 | 1148.403 |
| 1148.403 | 16.6158 | 1148.403 | 16.52    | 1148.403 | 16.58    | 1148.403 | 16.6     | 1148.403 |
| 1148.403 | 16.62   | 1148.403 | 16.52517 | 1148.403 | 16.58193 | 1148.403 | 16.60384 | 1148.403 |
| 1148.403 | 16.6258 | 1148.403 | 16.53    | 1148.403 | 16.59    | 1148.403 | 16.61    | 1148.403 |
| 1148.403 | 16.63   | 1148.403 | 16.53517 | 1148.403 | 16.59193 | 1148.403 | 16.61384 | 1148.403 |
| 1148.403 | 16.6358 | 1148.403 | 16.54    | 1148.403 | 16.6     | 1148.403 | 16.62    | 1148.403 |
| 1148.403 | 16.64   | 1148.403 | 16.54517 | 1148.403 | 16.60193 | 1148.403 | 16.62384 | 1148.403 |
| 1148.403 | 16.6458 | 1148.403 | 16.55    | 1148.403 | 16.61    | 1148.403 | 16.63    | 1148.403 |
| 1148.403 | 16.65   | 1148.403 | 16.55517 | 1148.403 | 16.61193 | 1148.403 | 16.63384 | 1148.403 |
| 1148.403 | 16.6558 | 1148.403 | 16.56    | 1148.403 | 16.62    | 1148.403 | 16.64    | 1148.403 |
| 1148.403 | 16.66   | 1148.403 | 16.56517 | 1148.403 | 16.62193 | 1148.403 | 16.64384 | 1148.403 |
| 1148.403 | 16.6658 | 1148.403 | 16.57    | 1148.403 | 16.63    | 1148.403 | 16.65    | 1148.403 |
| 1148.403 | 16.67   | 1148.403 | 16.57517 | 1148.403 | 16.63193 | 1148.403 | 16.65384 | 1148.403 |
| 1148.403 | 16.6758 | 1148.403 | 16.58    | 1148.403 | 16.64    | 1148.403 | 16.66    | 1148.403 |
| 1148.403 | 16.68   | 1148.403 | 16.58517 | 1148.403 | 16.64193 | 1148.403 | 16.66384 | 1148.403 |
| 1148.403 | 16.6858 | 1148.403 | 16.59    | 1148.403 | 16.65    | 1148.403 | 16.67    | 1148.403 |
| 1148.403 | 16.69   | 1148.403 | 16.59517 | 1148.403 | 16.65193 | 1148.403 | 16.67384 | 1148.403 |
| 1148.403 | 16.6958 | 1148.403 | 16.6     | 1148.403 | 16.66    | 1148.403 | 16.68    | 1148.403 |
| 1148.403 | 16.7    | 1148.403 | 16.60517 | 1148.403 | 16.66193 | 1148.403 | 16.68384 | 1148.403 |
| 1148.403 | 16.7058 | 1148.403 | 16.61    | 1148.403 | 16.67    | 1148.403 | 16.69    | 1148.403 |
| 1148.403 | 16.71   | 1148.403 | 16.61517 | 1148.403 | 16.67193 | 1148.403 | 16.69384 | 1148.403 |
| 1148.403 | 16.7158 | 1148.403 | 16.62    | 1148.403 | 16.68    | 1148.403 | 16.7     | 1148.403 |
| 1148.403 | 16.72   | 1148.403 | 16.62517 | 1148.403 | 16.68193 | 1148.403 | 16.70384 | 1148.403 |
| 1148.403 | 16.7258 | 1148.403 | 16.63    | 1148.403 | 16.69    | 1148.403 | 16.71    | 1148.403 |
| 1148.403 | 16.73   | 1148.403 | 16.63517 | 1148.403 | 16.69193 | 1148.403 | 16.71384 | 1148.403 |
| 1148.403 | 16.7358 | 1148.403 | 16.64    | 1148.403 | 16.7     | 1148.403 | 16.72    | 1148.403 |
| 1148.403 | 16.74   | 1148.403 | 16.64517 | 1148.403 | 16.70193 | 1148.403 | 16.72384 | 1148.403 |
| 1148.403 | 16.7458 | 1148.403 | 16.65    | 1148.403 | 16.71    | 1148.403 | 16.73    | 1148.403 |
| 1148.403 | 16.75   | 1148.403 | 16.65517 | 1148.403 | 16.71193 | 1148.403 | 16.73384 | 1148.403 |
| 1148.403 | 16.7558 | 1148.403 | 16.66    | 1148.403 | 16.72    | 1148.403 | 16.74    | 1148.403 |
| 1148.403 | 16.76   | 1148.403 | 16.66517 | 1148.403 | 16.72193 | 1148.403 | 16.74384 | 1148.403 |
| 1148.403 | 16.7658 | 1148.403 | 16.67    | 1148.403 | 16.73    | 1148.403 | 16.75    | 1148.403 |
| 1148.403 | 16.77   | 1148.403 | 16.67517 | 1148.403 | 16.73193 | 1148.403 | 16.75384 | 1148.403 |
| 1148.403 | 16.7758 | 1148.403 | 16.68    | 1148.403 | 16.74    | 1148.403 | 16.76    | 1148.403 |
| 1148.403 | 16.78   | 1148.403 | 16.68517 | 1148.403 | 16.74193 | 1148.403 | 16.76384 | 1148.403 |
| 1148.403 | 16.7858 | 1148.403 | 16.69    | 1148.403 | 16.75    | 1148.403 | 16.77    | 1148.403 |
| 1148.403 | 16.79   | 1148.403 | 16.69517 | 1148.403 | 16.75193 | 1148.403 | 16.77384 | 1148.403 |
| 1148.403 | 16.7958 | 1148.403 | 16.7     | 1148.403 | 16.76    | 1148.403 | 16.78    | 1148.403 |
| 1148.403 | 16.8    | 1148.403 | 16.70517 | 1148.403 | 16.76193 | 1148.403 | 16.78384 | 1148.403 |
| 1148.403 | 16.8058 | 1148.403 | 16.71    | 1148.403 | 16.77    | 1148.403 | 16.79    | 1148.403 |
| 1148.403 | 16.81   | 1148.403 | 16.71517 | 1148.403 | 16.77193 | 1148.403 | 16.79384 | 1148.403 |
| 1148.403 | 16.8158 | 1148.403 | 16.72    | 1148.403 | 16.78    | 1148.403 | 16.8     | 1148.403 |
| 1148.403 | 16.82   | 1148.403 | 16.72517 | 1148.403 | 16.78193 | 1148.403 | 16.80384 | 1148.403 |
| 1148.403 | 16.8258 | 1148.403 | 16.73    | 1148.403 | 16.79    | 1148.403 | 16.81    | 1148.403 |
| 1148.403 | 16.83   | 1148.403 | 16.73517 | 1148.403 | 16.79193 | 1148.403 | 16.81384 | 1148.403 |

|          |         |          |          |          |          |          |          |          |
|----------|---------|----------|----------|----------|----------|----------|----------|----------|
| 1148.403 | 16.8358 | 1148.403 | 16.74    | 1148.403 | 16.8     | 1148.403 | 16.82    | 1148.403 |
| 1148.403 | 16.84   | 1148.403 | 16.74517 | 1148.403 | 16.80193 | 1148.403 | 16.82384 | 1148.403 |
| 1148.403 | 16.8458 | 1148.403 | 16.75    | 1148.403 | 16.81    | 1148.403 | 16.83    | 1148.403 |
| 1148.403 | 16.85   | 1148.403 | 16.75517 | 1148.403 | 16.81193 | 1148.403 | 16.83384 | 1148.403 |
| 1148.403 | 16.8558 | 1148.403 | 16.76    | 1148.403 | 16.82    | 1148.403 | 16.84    | 1148.403 |
| 1148.403 | 16.86   | 1148.403 | 16.76517 | 1148.403 | 16.82193 | 1148.403 | 16.84384 | 1148.403 |
| 1148.403 | 16.8658 | 1148.403 | 16.77    | 1148.403 | 16.83    | 1148.403 | 16.85    | 1148.403 |
| 1148.403 | 16.87   | 1148.403 | 16.77517 | 1148.403 | 16.83193 | 1148.403 | 16.85384 | 1148.403 |
| 1148.403 | 16.8758 | 1148.403 | 16.78    | 1148.403 | 16.84    | 1148.403 | 16.86    | 1148.403 |
| 1148.403 | 16.88   | 1148.403 | 16.78517 | 1148.403 | 16.84193 | 1148.403 | 16.86384 | 1148.403 |
| 1148.403 | 16.8858 | 1148.403 | 16.79    | 1148.403 | 16.85    | 1148.403 | 16.87    | 1148.403 |
| 1148.403 | 16.89   | 1148.403 | 16.79517 | 1148.403 | 16.85193 | 1148.403 | 16.87384 | 1148.403 |
| 1148.403 | 16.8958 | 1148.403 | 16.8     | 1148.403 | 16.86    | 1148.403 | 16.88    | 1148.403 |
| 1148.403 | 16.9    | 1148.403 | 16.80517 | 1148.403 | 16.86193 | 1148.403 | 16.88384 | 1148.403 |
| 1148.403 | 16.9058 | 1148.403 | 16.81    | 1148.403 | 16.87    | 1148.403 | 16.89    | 1148.403 |
| 1148.403 | 16.91   | 1148.403 | 16.81517 | 1148.403 | 16.87193 | 1148.403 | 16.89384 | 1148.403 |
| 1148.403 | 16.9158 | 1148.403 | 16.82    | 1148.403 | 16.88    | 1148.403 | 16.9     | 1148.403 |
| 1148.403 | 16.92   | 1148.403 | 16.82517 | 1148.403 | 16.88193 | 1148.403 | 16.90384 | 1148.403 |
| 1148.403 | 16.9258 | 1148.403 | 16.83    | 1148.403 | 16.89    | 1148.403 | 16.91    | 1148.403 |
| 1148.403 | 16.93   | 1148.403 | 16.83517 | 1148.403 | 16.89193 | 1148.403 | 16.91384 | 1148.403 |
| 1148.403 | 16.9358 | 1148.403 | 16.84    | 1148.403 | 16.9     | 1148.403 | 16.92    | 1148.403 |
| 1148.403 | 16.94   | 1148.403 | 16.84517 | 1148.403 | 16.90193 | 1148.403 | 16.92384 | 1148.403 |
| 1148.403 | 16.9458 | 1148.403 | 16.85    | 1148.403 | 16.91    | 1148.403 | 16.93    | 1148.403 |
| 1148.403 | 16.95   | 1148.403 | 16.85517 | 1148.403 | 16.91193 | 1148.403 | 16.93384 | 1148.403 |
| 1148.403 | 16.9558 | 1148.403 | 16.86    | 1148.403 | 16.92    | 1148.403 | 16.94    | 1148.403 |
| 1148.403 | 16.96   | 1148.403 | 16.86517 | 1148.403 | 16.92193 | 1148.403 | 16.94384 | 1148.403 |
| 1148.403 | 16.9658 | 1148.403 | 16.87    | 1148.403 | 16.93    | 1148.403 | 16.95    | 1148.403 |
| 1148.403 | 16.97   | 1148.403 | 16.87517 | 1148.403 | 16.93193 | 1148.403 | 16.95384 | 1148.403 |
| 1148.403 | 16.9758 | 1148.403 | 16.88    | 1148.403 | 16.94    | 1148.403 | 16.96    | 1148.403 |
| 1148.403 | 16.98   | 1148.403 | 16.88517 | 1148.403 | 16.94193 | 1148.403 | 16.96384 | 1148.403 |
| 1148.403 | 16.9858 | 1148.403 | 16.89    | 1148.403 | 16.95    | 1148.403 | 16.97    | 1148.403 |
| 1148.403 | 16.99   | 1148.403 | 16.89517 | 1148.403 | 16.95193 | 1148.403 | 16.97384 | 1148.403 |
| 1148.403 | 16.9958 | 1148.403 | 16.9     | 1148.403 | 16.96    | 1148.403 | 16.98    | 1148.403 |
| 1148.403 | 17      | 1148.403 | 16.90517 | 1148.403 | 16.96193 | 1148.403 | 16.98384 | 1148.403 |
| 1148.403 | 17.0058 | 1148.403 | 16.91    | 1148.403 | 16.97    | 1148.403 | 16.99    | 1148.403 |
| 1148.403 | 17.01   | 1148.403 | 16.91517 | 1148.403 | 16.97193 | 1148.403 | 16.99384 | 1148.403 |
| 1148.403 | 17.0158 | 1148.403 | 16.92    | 1148.403 | 16.98    | 1148.403 | 17       | 1148.403 |
| 1148.403 | 17.02   | 1148.403 | 16.92517 | 1148.403 | 16.98193 | 1148.403 | 17.00384 | 1148.403 |
| 1148.403 | 17.0258 | 1148.403 | 16.93    | 1148.403 | 16.99    | 1148.403 | 17.01    | 1148.403 |
| 1148.403 | 17.03   | 1148.403 | 16.93517 | 1148.403 | 16.99193 | 1148.403 | 17.01384 | 1148.403 |
| 1148.403 | 17.0358 | 1148.403 | 16.94    | 1148.403 | 17       | 1148.403 | 17.02    | 1148.403 |
| 1148.403 | 17.04   | 1148.403 | 16.94517 | 1148.403 | 17.00193 | 1148.403 | 17.02384 | 1148.403 |
| 1148.403 | 17.0458 | 1148.403 | 16.95    | 1148.403 | 17.01    | 1148.403 | 17.03    | 1148.403 |
| 1148.403 | 17.05   | 1148.403 | 16.95517 | 1148.403 | 17.01193 | 1148.403 | 17.03384 | 1148.403 |
| 1148.403 | 17.0558 | 1148.403 | 16.96    | 1148.403 | 17.02    | 1148.403 | 17.04    | 1148.403 |
| 1148.403 | 17.06   | 1148.403 | 16.96517 | 1148.403 | 17.02193 | 1148.403 | 17.04384 | 1148.403 |
| 1148.403 | 17.0658 | 1148.403 | 16.97    | 1148.403 | 17.03    | 1148.403 | 17.05    | 1148.403 |

|          |         |          |          |          |          |          |          |          |
|----------|---------|----------|----------|----------|----------|----------|----------|----------|
| 1148.403 | 17.07   | 1148.403 | 16.97517 | 1148.403 | 17.03193 | 1148.403 | 17.05384 | 1148.403 |
| 1148.403 | 17.0758 | 1148.403 | 16.98    | 1148.403 | 17.04    | 1148.403 | 17.06    | 1148.403 |
| 1148.403 | 17.08   | 1148.403 | 16.98517 | 1148.403 | 17.04193 | 1148.403 | 17.06384 | 1148.403 |
| 1148.403 | 17.0858 | 1148.403 | 16.99    | 1148.403 | 17.05    | 1148.403 | 17.07    | 1148.403 |
| 1148.403 | 17.09   | 1148.403 | 16.99517 | 1148.403 | 17.05193 | 1148.403 | 17.07384 | 1148.403 |
| 1148.403 | 17.0958 | 1148.403 | 17       | 1148.403 | 17.06    | 1148.403 | 17.08    | 1148.403 |
| 1148.403 | 17.1    | 1148.403 | 17.00517 | 1148.403 | 17.06193 | 1148.403 | 17.08384 | 1148.403 |
| 1148.403 | 17.1058 | 1148.403 | 17.01    | 1148.403 | 17.07    | 1148.403 | 17.09    | 1148.403 |
| 1148.403 | 17.11   | 1148.403 | 17.01517 | 1148.403 | 17.07193 | 1148.403 | 17.09384 | 1148.403 |
| 1148.403 | 17.1158 | 1148.403 | 17.02    | 1148.403 | 17.08    | 1148.403 | 17.1     | 1148.403 |
| 1148.403 | 17.12   | 1148.403 | 17.02517 | 1148.403 | 17.08193 | 1148.403 | 17.10384 | 1148.403 |
| 1148.403 | 17.1258 | 1148.403 | 17.03    | 1148.403 | 17.09    | 1148.403 | 17.11    | 1148.403 |
| 1148.403 | 17.13   | 1148.403 | 17.03517 | 1148.403 | 17.09193 | 1148.403 | 17.11384 | 1148.403 |
| 1148.403 | 17.1358 | 1148.403 | 17.04    | 1148.403 | 17.1     | 1148.403 | 17.12    | 1148.403 |
| 1148.403 | 17.14   | 1148.403 | 17.04517 | 1148.403 | 17.10193 | 1148.403 | 17.12384 | 1148.403 |
| 1148.403 | 17.1458 | 1148.403 | 17.05    | 1148.403 | 17.11    | 1148.403 | 17.13    | 1148.403 |
| 1148.403 | 17.15   | 1148.403 | 17.05517 | 1148.403 | 17.11193 | 1148.403 | 17.13384 | 1148.403 |
| 1148.403 | 17.1558 | 1148.403 | 17.06    | 1148.403 | 17.12    | 1148.403 | 17.14    | 1148.403 |
| 1148.403 | 17.16   | 1148.403 | 17.06517 | 1148.403 | 17.12193 | 1148.403 | 17.14384 | 1148.403 |
| 1148.403 | 17.1658 | 1148.403 | 17.07    | 1148.403 | 17.13    | 1148.403 | 17.15    | 1148.403 |
| 1148.403 | 17.17   | 1148.403 | 17.07517 | 1148.403 | 17.13193 | 1148.403 | 17.15384 | 1148.403 |
| 1148.403 | 17.1758 | 1148.403 | 17.08    | 1148.403 | 17.14    | 1148.403 | 17.16    | 1148.403 |
| 1148.403 | 17.18   | 1148.403 | 17.08517 | 1148.403 | 17.14193 | 1148.403 | 17.16384 | 1148.403 |
| 1148.403 | 17.1858 | 1148.403 | 17.09    | 1148.403 | 17.15    | 1148.403 | 17.17    | 1148.403 |
| 1148.403 | 17.19   | 1148.403 | 17.09517 | 1148.403 | 17.15193 | 1148.403 | 17.17384 | 1148.403 |
| 1148.403 | 17.1958 | 1148.403 | 17.1     | 1148.403 | 17.16    | 1148.403 | 17.18    | 1148.403 |
| 1148.403 | 17.2    | 1148.403 | 17.10517 | 1148.403 | 17.16193 | 1148.403 | 17.18384 | 1148.403 |
| 1148.403 | 17.2058 | 1148.403 | 17.11    | 1148.403 | 17.17    | 1148.403 | 17.19    | 1148.403 |
| 1148.403 | 17.21   | 1148.403 | 17.11517 | 1148.403 | 17.17193 | 1148.403 | 17.19384 | 1148.403 |
| 1148.403 | 17.2158 | 1148.403 | 17.12    | 1148.403 | 17.18    | 1148.403 | 17.2     | 1148.403 |
| 1148.403 | 17.22   | 1148.403 | 17.12517 | 1148.403 | 17.18193 | 1148.403 | 17.20384 | 1148.403 |
| 1148.403 | 17.2258 | 1148.403 | 17.13    | 1148.403 | 17.19    | 1148.403 | 17.21    | 1148.403 |
| 1148.403 | 17.23   | 1148.403 | 17.13517 | 1148.403 | 17.19193 | 1148.403 | 17.21384 | 1148.403 |
| 1148.403 | 17.2358 | 1148.403 | 17.14    | 1148.403 | 17.2     | 1148.403 | 17.22    | 1148.403 |
| 1148.403 | 17.24   | 1148.403 | 17.14517 | 1148.403 | 17.20193 | 1148.403 | 17.22384 | 1148.403 |
| 1148.403 | 17.2458 | 1148.403 | 17.15    | 1148.403 | 17.21    | 1148.403 | 17.23    | 1148.403 |
| 1148.403 | 17.25   | 1148.403 | 17.15517 | 1148.403 | 17.21193 | 1148.403 | 17.23384 | 1148.403 |
| 1148.403 | 17.2558 | 1148.403 | 17.16    | 1148.403 | 17.22    | 1148.403 | 17.24    | 1148.403 |
| 1148.403 | 17.26   | 1148.403 | 17.16517 | 1148.403 | 17.22193 | 1148.403 | 17.24384 | 1148.403 |
| 1148.403 | 17.2658 | 1148.403 | 17.17    | 1148.403 | 17.23    | 1148.403 | 17.25    | 1148.403 |
| 1148.403 | 17.27   | 1148.403 | 17.17517 | 1148.403 | 17.23193 | 1148.403 | 17.25384 | 1148.403 |
| 1148.403 | 17.2758 | 1148.403 | 17.18    | 1148.403 | 17.24    | 1148.403 | 17.26    | 1148.403 |
| 1148.403 | 17.28   | 1148.403 | 17.18517 | 1148.403 | 17.24193 | 1148.403 | 17.26384 | 1148.403 |
| 1148.403 | 17.2858 | 1148.403 | 17.19    | 1148.403 | 17.25    | 1148.403 | 17.27    | 1148.403 |
| 1148.403 | 17.29   | 1148.403 | 17.19517 | 1148.403 | 17.25193 | 1148.403 | 17.27384 | 1148.403 |
| 1148.403 | 17.2958 | 1148.403 | 17.2     | 1148.403 | 17.26    | 1148.403 | 17.28    | 1148.403 |
| 1148.403 | 17.3    | 1148.403 | 17.20517 | 1148.403 | 17.26193 | 1148.403 | 17.28384 | 1148.403 |

|          |         |          |          |          |          |          |          |          |
|----------|---------|----------|----------|----------|----------|----------|----------|----------|
| 1148.403 | 17.3058 | 1148.403 | 17.21    | 1148.403 | 17.27    | 1148.403 | 17.29    | 1148.403 |
| 1148.403 | 17.31   | 1148.403 | 17.21517 | 1148.403 | 17.27193 | 1148.403 | 17.29384 | 1148.403 |
| 1148.403 | 17.3158 | 1148.403 | 17.22    | 1148.403 | 17.28    | 1148.403 | 17.3     | 1148.403 |
| 1148.403 | 17.32   | 1148.403 | 17.22517 | 1148.403 | 17.28193 | 1148.403 | 17.30384 | 1148.403 |
| 1148.403 | 17.3258 | 1148.403 | 17.23    | 1148.403 | 17.29    | 1148.403 | 17.31    | 1148.403 |
| 1148.403 | 17.33   | 1148.403 | 17.23517 | 1148.403 | 17.29193 | 1148.403 | 17.31384 | 1148.403 |
| 1148.403 | 17.3358 | 1148.403 | 17.24    | 1148.403 | 17.3     | 1148.403 | 17.32    | 1148.403 |
| 1148.403 | 17.34   | 1148.403 | 17.24517 | 1148.403 | 17.30193 | 1148.403 | 17.32384 | 1148.403 |
| 1148.403 | 17.3458 | 1148.403 | 17.25    | 1148.403 | 17.31    | 1148.403 | 17.33    | 1148.403 |
| 1148.403 | 17.35   | 1148.403 | 17.25517 | 1148.403 | 17.31193 | 1148.403 | 17.33384 | 1148.403 |
| 1148.403 | 17.3558 | 1148.403 | 17.26    | 1148.403 | 17.32    | 1148.403 | 17.34    | 1148.403 |
| 1148.403 | 17.36   | 1148.403 | 17.26517 | 1148.403 | 17.32193 | 1148.403 | 17.34384 | 1148.403 |
| 1148.403 | 17.3658 | 1148.403 | 17.27    | 1148.403 | 17.33    | 1148.403 | 17.35    | 1148.403 |
| 1148.403 | 17.37   | 1148.403 | 17.27517 | 1148.403 | 17.33193 | 1148.403 | 17.35384 | 1148.403 |
| 1148.403 | 17.3758 | 1148.403 | 17.28    | 1148.403 | 17.34    | 1148.403 | 17.36    | 1148.403 |
| 1148.403 | 17.38   | 1148.403 | 17.28517 | 1148.403 | 17.34193 | 1148.403 | 17.36384 | 1148.403 |
| 1148.403 | 17.3858 | 1148.403 | 17.29    | 1148.403 | 17.35    | 1148.403 | 17.37    | 1148.403 |
| 1148.403 | 17.39   | 1148.403 | 17.29517 | 1148.403 | 17.35193 | 1148.403 | 17.37384 | 1148.403 |
| 1148.403 | 17.3958 | 1148.403 | 17.3     | 1148.403 | 17.36    | 1148.403 | 17.38    | 1148.403 |
| 1148.403 | 17.4    | 1148.403 | 17.30517 | 1148.403 | 17.36193 | 1148.403 | 17.38384 | 1148.403 |
| 1148.403 | 17.4058 | 1148.403 | 17.31    | 1148.403 | 17.37    | 1148.403 | 17.39    | 1148.403 |
| 1148.403 | 17.41   | 1148.403 | 17.31517 | 1148.403 | 17.37193 | 1148.403 | 17.39384 | 1148.403 |
| 1148.403 | 17.4158 | 1148.403 | 17.32    | 1148.403 | 17.38    | 1148.403 | 17.4     | 1148.403 |
| 1148.403 | 17.42   | 1148.403 | 17.32517 | 1148.403 | 17.38193 | 1148.403 | 17.40384 | 1148.403 |
| 1148.403 | 17.4258 | 1148.403 | 17.33    | 1148.403 | 17.39    | 1148.403 | 17.41    | 1148.403 |
| 1148.403 | 17.43   | 1148.403 | 17.33517 | 1148.403 | 17.39193 | 1148.403 | 17.41384 | 1148.403 |
| 1148.403 | 17.4358 | 1148.403 | 17.34    | 1148.403 | 17.4     | 1148.403 | 17.42    | 1148.403 |
| 1148.403 | 17.44   | 1148.403 | 17.34517 | 1148.403 | 17.40193 | 1148.403 | 17.42384 | 1148.403 |
| 1148.403 | 17.4458 | 1148.403 | 17.35    | 1148.403 | 17.41    | 1148.403 | 17.43    | 1148.403 |
| 1148.403 | 17.45   | 1148.403 | 17.35517 | 1148.403 | 17.41193 | 1148.403 | 17.43384 | 1148.403 |
| 1148.403 | 17.4558 | 1148.403 | 17.36    | 1148.403 | 17.42    | 1148.403 | 17.44    | 1148.403 |
| 1148.403 | 17.46   | 1148.403 | 17.36517 | 1148.403 | 17.42193 | 1148.403 | 17.44384 | 1148.403 |
| 1148.403 | 17.4658 | 1148.403 | 17.37    | 1148.403 | 17.43    | 1148.403 | 17.45    | 1148.403 |
| 1148.403 | 17.47   | 1148.403 | 17.37517 | 1148.403 | 17.43193 | 1148.403 | 17.45384 | 1148.403 |
| 1148.403 | 17.4758 | 1148.403 | 17.38    | 1148.403 | 17.44    | 1148.403 | 17.46    | 1148.403 |
| 1148.403 | 17.48   | 1148.403 | 17.38517 | 1148.403 | 17.44193 | 1148.403 | 17.46384 | 1148.403 |
| 1148.403 | 17.4858 | 1148.403 | 17.39    | 1148.403 | 17.45    | 1148.403 | 17.47    | 1148.403 |
| 1148.403 | 17.49   | 1148.403 | 17.39517 | 1148.403 | 17.45193 | 1148.403 | 17.47384 | 1148.403 |
| 1148.403 | 17.4958 | 1148.403 | 17.4     | 1148.403 | 17.46    | 1148.403 | 17.48    | 1148.403 |
| 1148.403 | 17.5    | 1148.403 | 17.40517 | 1148.403 | 17.46193 | 1148.403 | 17.48384 | 1148.403 |
| 1148.403 | 17.5058 | 1148.403 | 17.41    | 1148.403 | 17.47    | 1148.403 | 17.49    | 1148.403 |
| 1148.403 | 17.51   | 1148.403 | 17.41517 | 1148.403 | 17.47193 | 1148.403 | 17.49384 | 1148.403 |
| 1148.403 | 17.5158 | 1148.403 | 17.42    | 1148.403 | 17.48    | 1148.403 | 17.5     | 1148.403 |
| 1148.403 | 17.52   | 1148.403 | 17.42517 | 1148.403 | 17.48193 | 1148.403 | 17.50384 | 1148.403 |
| 1148.403 | 17.5258 | 1148.403 | 17.43    | 1148.403 | 17.49    | 1148.403 | 17.51    | 1148.403 |
| 1148.403 | 17.53   | 1148.403 | 17.43517 | 1148.403 | 17.49193 | 1148.403 | 17.51384 | 1148.403 |
| 1148.403 | 17.5358 | 1148.403 | 17.44    | 1148.403 | 17.5     | 1148.403 | 17.52    | 1148.403 |

|          |         |          |          |          |          |          |          |          |
|----------|---------|----------|----------|----------|----------|----------|----------|----------|
| 1148.403 | 17.54   | 1148.403 | 17.44517 | 1148.403 | 17.50193 | 1148.403 | 17.52384 | 1148.403 |
| 1148.403 | 17.5458 | 1148.403 | 17.45    | 1148.403 | 17.51    | 1148.403 | 17.53    | 1148.403 |
| 1148.403 | 17.55   | 1148.403 | 17.45517 | 1148.403 | 17.51193 | 1148.403 | 17.53384 | 1148.403 |
| 1148.403 | 17.5558 | 1148.403 | 17.46    | 1148.403 | 17.52    | 1148.403 | 17.54    | 1148.403 |
| 1148.403 | 17.56   | 1148.403 | 17.46517 | 1148.403 | 17.52193 | 1148.403 | 17.54384 | 1148.403 |
| 1148.403 | 17.5658 | 1148.403 | 17.47    | 1148.403 | 17.53    | 1148.403 | 17.55    | 1148.403 |
| 1148.403 | 17.57   | 1148.403 | 17.47517 | 1148.403 | 17.53193 | 1148.403 | 17.55384 | 1148.403 |
| 1148.403 | 17.5758 | 1148.403 | 17.48    | 1148.403 | 17.54    | 1148.403 | 17.56    | 1148.403 |
| 1148.403 | 17.58   | 1148.403 | 17.48517 | 1148.403 | 17.54193 | 1148.403 | 17.56384 | 1148.403 |
| 1148.403 | 17.5858 | 1148.403 | 17.49    | 1148.403 | 17.55    | 1148.403 | 17.57    | 1148.403 |
| 1148.403 | 17.59   | 1148.403 | 17.49517 | 1148.403 | 17.55193 | 1148.403 | 17.57384 | 1148.403 |
| 1148.403 | 17.5958 | 1148.403 | 17.5     | 1148.403 | 17.56    | 1148.403 | 17.58    | 1148.403 |
| 1148.403 | 17.6    | 1148.403 | 17.50517 | 1148.403 | 17.56193 | 1148.403 | 17.58384 | 1148.403 |
| 1148.403 | 17.6058 | 1148.403 | 17.51    | 1148.403 | 17.57    | 1148.403 | 17.59    | 1148.403 |
| 1148.403 | 17.61   | 1148.403 | 17.51517 | 1148.403 | 17.57193 | 1148.403 | 17.59384 | 1148.403 |
| 1148.403 | 17.6158 | 1148.403 | 17.52    | 1148.403 | 17.58    | 1148.403 | 17.6     | 1148.403 |
| 1148.403 | 17.62   | 1148.403 | 17.52517 | 1148.403 | 17.58193 | 1148.403 | 17.60384 | 1148.403 |
| 1148.403 | 17.6258 | 1148.403 | 17.53    | 1148.403 | 17.59    | 1148.403 | 17.61    | 1148.403 |
| 1148.403 | 17.63   | 1148.403 | 17.53517 | 1148.403 | 17.59193 | 1148.403 | 17.61384 | 1148.403 |
| 1148.403 | 17.6358 | 1148.403 | 17.54    | 1148.403 | 17.6     | 1148.403 | 17.62    | 1148.403 |
| 1148.403 | 17.64   | 1148.403 | 17.54517 | 1148.403 | 17.60193 | 1148.403 | 17.62384 | 1148.403 |
| 1148.403 | 17.6458 | 1148.403 | 17.55    | 1148.403 | 17.61    | 1148.403 | 17.63    | 1148.403 |
| 1148.403 | 17.65   | 1148.403 | 17.55517 | 1148.403 | 17.61193 | 1148.403 | 17.63384 | 1148.403 |
| 1148.403 | 17.6558 | 1148.403 | 17.56    | 1148.403 | 17.62    | 1148.403 | 17.64    | 1148.403 |
| 1148.403 | 17.66   | 1148.403 | 17.56517 | 1148.403 | 17.62193 | 1148.403 | 17.64384 | 1148.403 |
| 1148.403 | 17.6658 | 1148.403 | 17.57    | 1148.403 | 17.63    | 1148.403 | 17.65    | 1148.403 |
| 1148.403 | 17.67   | 1148.403 | 17.57517 | 1148.403 | 17.63193 | 1148.403 | 17.65384 | 1148.403 |
| 1148.403 | 17.6758 | 1148.403 | 17.58    | 1148.403 | 17.64    | 1148.403 | 17.66    | 1148.403 |
| 1148.403 | 17.68   | 1148.403 | 17.58517 | 1148.403 | 17.64193 | 1148.403 | 17.66384 | 1148.403 |
| 1148.403 | 17.6858 | 1148.403 | 17.59    | 1148.403 | 17.65    | 1148.403 | 17.67    | 1148.403 |
| 1148.403 | 17.69   | 1148.403 | 17.59517 | 1148.403 | 17.65193 | 1148.403 | 17.67384 | 1148.403 |
| 1148.403 | 17.6958 | 1148.403 | 17.6     | 1148.403 | 17.66    | 1148.403 | 17.68    | 1148.403 |
| 1148.403 | 17.7    | 1148.403 | 17.60517 | 1148.403 | 17.66193 | 1148.403 | 17.68384 | 1148.403 |
| 1148.403 | 17.7058 | 1148.403 | 17.61    | 1148.403 | 17.67    | 1148.403 | 17.69    | 1148.403 |
| 1148.403 | 17.71   | 1148.403 | 17.61517 | 1148.403 | 17.67193 | 1148.403 | 17.69384 | 1148.403 |
| 1148.403 | 17.7158 | 1148.403 | 17.62    | 1148.403 | 17.68    | 1148.403 | 17.7     | 1148.403 |
| 1148.403 | 17.72   | 1148.403 | 17.62517 | 1148.403 | 17.68193 | 1148.403 | 17.70384 | 1148.403 |
| 1148.403 | 17.7258 | 1148.403 | 17.63    | 1148.403 | 17.69    | 1148.403 | 17.71    | 1148.403 |
| 1148.403 | 17.73   | 1148.403 | 17.63517 | 1148.403 | 17.69193 | 1148.403 | 17.71384 | 1148.403 |
| 1148.403 | 17.7358 | 1148.403 | 17.64    | 1148.403 | 17.7     | 1148.403 | 17.72    | 1148.403 |
| 1148.403 | 17.74   | 1148.403 | 17.64517 | 1148.403 | 17.70193 | 1148.403 | 17.72384 | 1148.403 |
| 1148.403 | 17.7458 | 1148.403 | 17.65    | 1148.403 | 17.71    | 1148.403 | 17.73    | 1148.403 |
| 1148.403 | 17.75   | 1148.403 | 17.65517 | 1148.403 | 17.71193 | 1148.403 | 17.73384 | 1148.403 |
| 1148.403 | 17.7558 | 1148.403 | 17.66    | 1148.403 | 17.72    | 1148.403 | 17.74    | 1148.403 |
| 1148.403 | 17.76   | 1148.403 | 17.66517 | 1148.403 | 17.72193 | 1148.403 | 17.74384 | 1148.403 |
| 1148.403 | 17.7658 | 1148.403 | 17.67    | 1148.403 | 17.73    | 1148.403 | 17.75    | 1148.403 |
| 1148.403 | 17.77   | 1148.403 | 17.67517 | 1148.403 | 17.73193 | 1148.403 | 17.75384 | 1148.403 |

|          |         |          |          |          |          |          |          |          |
|----------|---------|----------|----------|----------|----------|----------|----------|----------|
| 1148.403 | 17.7758 | 1148.403 | 17.68    | 1148.403 | 17.74    | 1148.403 | 17.76    | 1148.403 |
| 1148.403 | 17.78   | 1148.403 | 17.68517 | 1148.403 | 17.74193 | 1148.403 | 17.76384 | 1148.403 |
| 1148.403 | 17.7858 | 1148.403 | 17.69    | 1148.403 | 17.75    | 1148.403 | 17.77    | 1148.403 |
| 1148.403 | 17.79   | 1148.403 | 17.69517 | 1148.403 | 17.75193 | 1148.403 | 17.77384 | 1148.403 |
| 1148.403 | 17.7958 | 1148.403 | 17.7     | 1148.403 | 17.76    | 1148.403 | 17.78    | 1148.403 |
| 1148.403 | 17.8    | 1148.403 | 17.70517 | 1148.403 | 17.76193 | 1148.403 | 17.78384 | 1148.403 |
| 1148.403 | 17.8058 | 1148.403 | 17.71    | 1148.403 | 17.77    | 1148.403 | 17.79    | 1148.403 |
| 1148.403 | 17.81   | 1148.403 | 17.71517 | 1148.403 | 17.77193 | 1148.403 | 17.79384 | 1148.403 |
| 1148.403 | 17.8158 | 1148.403 | 17.72    | 1148.403 | 17.78    | 1148.403 | 17.8     | 1148.403 |
| 1148.403 | 17.82   | 1148.403 | 17.72517 | 1148.403 | 17.78193 | 1148.403 | 17.80384 | 1148.403 |
| 1148.403 | 17.8258 | 1148.403 | 17.73    | 1148.403 | 17.79    | 1148.403 | 17.81    | 1148.403 |
| 1148.403 | 17.83   | 1148.403 | 17.73517 | 1148.403 | 17.79193 | 1148.403 | 17.81384 | 1148.403 |
| 1148.403 | 17.8358 | 1148.403 | 17.74    | 1148.403 | 17.8     | 1148.403 | 17.82    | 1148.403 |
| 1148.403 | 17.84   | 1148.403 | 17.74517 | 1148.403 | 17.80193 | 1148.403 | 17.82384 | 1148.403 |
| 1148.403 | 17.8458 | 1148.403 | 17.75    | 1148.403 | 17.81    | 1148.403 | 17.83    | 1148.403 |
| 1148.403 | 17.85   | 1148.403 | 17.75517 | 1148.403 | 17.81193 | 1148.403 | 17.83384 | 1148.403 |
| 1148.403 | 17.8558 | 1148.403 | 17.76    | 1148.403 | 17.82    | 1148.403 | 17.84    | 1148.403 |
| 1148.403 | 17.86   | 1148.403 | 17.76517 | 1148.403 | 17.82193 | 1148.403 | 17.84384 | 1148.403 |
| 1148.403 | 17.8658 | 1148.403 | 17.77    | 1148.403 | 17.83    | 1148.403 | 17.85    | 1148.403 |
| 1148.403 | 17.87   | 1148.403 | 17.77517 | 1148.403 | 17.83193 | 1148.403 | 17.85384 | 1148.403 |
| 1148.403 | 17.8758 | 1148.403 | 17.78    | 1148.403 | 17.84    | 1148.403 | 17.86    | 1148.403 |
| 1148.403 | 17.88   | 1148.403 | 17.78517 | 1148.403 | 17.84193 | 1148.403 | 17.86384 | 1148.403 |
| 1148.403 | 17.8858 | 1148.403 | 17.79    | 1148.403 | 17.85    | 1148.403 | 17.87    | 1148.403 |
| 1148.403 | 17.89   | 1148.403 | 17.79517 | 1148.403 | 17.85193 | 1148.403 | 17.87384 | 1148.403 |
| 1148.403 | 17.8958 | 1148.403 | 17.8     | 1148.403 | 17.86    | 1148.403 | 17.88    | 1148.403 |
| 1148.403 | 17.9    | 1148.403 | 17.80517 | 1148.403 | 17.86193 | 1148.403 | 17.88384 | 1148.403 |
| 1148.403 | 17.9058 | 1148.403 | 17.81    | 1148.403 | 17.87    | 1148.403 | 17.89    | 1148.403 |
| 1148.403 | 17.91   | 1148.403 | 17.81517 | 1148.403 | 17.87193 | 1148.403 | 17.89384 | 1148.403 |
| 1148.403 | 17.9158 | 1148.403 | 17.82    | 1148.403 | 17.88    | 1148.403 | 17.9     | 1148.403 |
| 1148.403 | 17.92   | 1148.403 | 17.82517 | 1148.403 | 17.88193 | 1148.403 | 17.90384 | 1148.403 |
| 1148.403 | 17.9258 | 1148.403 | 17.83    | 1148.403 | 17.89    | 1148.403 | 17.91    | 1148.403 |
| 1148.403 | 17.93   | 1148.403 | 17.83517 | 1148.403 | 17.89193 | 1148.403 | 17.91384 | 1148.403 |
| 1148.403 | 17.9358 | 1148.403 | 17.84    | 1148.403 | 17.9     | 1148.403 | 17.92    | 1148.403 |
| 1148.403 | 17.94   | 1148.403 | 17.84517 | 1148.403 | 17.90193 | 1148.403 | 17.92384 | 1148.403 |
| 1148.403 | 17.9458 | 1148.403 | 17.85    | 1148.403 | 17.91    | 1148.403 | 17.93    | 1148.403 |
| 1148.403 | 17.95   | 1148.403 | 17.85517 | 1148.403 | 17.91193 | 1148.403 | 17.93384 | 1148.403 |
| 1148.403 | 17.9558 | 1148.403 | 17.86    | 1148.403 | 17.92    | 1148.403 | 17.94    | 1148.403 |
| 1148.403 | 17.96   | 1148.403 | 17.86517 | 1148.403 | 17.92193 | 1148.403 | 17.94384 | 1148.403 |
| 1148.403 | 17.9658 | 1148.403 | 17.87    | 1148.403 | 17.93    | 1148.403 | 17.95    | 1148.403 |
| 1148.403 | 17.97   | 1148.403 | 17.87517 | 1148.403 | 17.93193 | 1148.403 | 17.95384 | 1148.403 |
| 1148.403 | 17.9758 | 1148.403 | 17.88    | 1148.403 | 17.94    | 1148.403 | 17.96    | 1148.403 |
| 1148.403 | 17.98   | 1148.403 | 17.88517 | 1148.403 | 17.94193 | 1148.403 | 17.96384 | 1148.403 |
| 1148.403 | 17.9858 | 1148.403 | 17.89    | 1148.403 | 17.95    | 1148.403 | 17.97    | 1148.403 |
| 1148.403 | 17.99   | 1148.403 | 17.89517 | 1148.403 | 17.95193 | 1148.403 | 17.97384 | 1148.403 |
| 1148.403 | 17.9958 | 1148.403 | 17.9     | 1148.403 | 17.96    | 1148.403 | 17.98    | 1148.403 |
| 1148.403 | 18      | 1148.403 | 17.90517 | 1148.403 | 17.96193 | 1148.403 | 17.98384 | 1148.403 |
| 1148.403 | 18.0058 | 1148.403 | 17.91    | 1148.403 | 17.97    | 1148.403 | 17.99    | 1148.403 |



|          |         |          |          |          |          |          |          |          |
|----------|---------|----------|----------|----------|----------|----------|----------|----------|
| 1148.403 | 18.01   | 1148.403 | 17.91517 | 1148.403 | 17.97193 | 1148.403 | 17.99384 | 1148.403 |
| 1148.403 | 18.0158 | 1148.403 | 17.92    | 1148.403 | 17.98    | 1148.403 | 18       | 1148.403 |
| 1148.403 | 18.02   | 1148.403 | 17.92517 | 1148.403 | 17.98193 | 1148.403 | 18.00384 | 1148.403 |
| 1148.403 | 18.0258 | 1148.403 | 17.93    | 1148.403 | 17.99    | 1148.403 | 18.01    | 1148.403 |
| 1148.403 | 18.03   | 1148.403 | 17.93517 | 1148.403 | 17.99193 | 1148.403 | 18.01384 | 1148.403 |
| 1148.403 | 18.0358 | 1148.403 | 17.94    | 1148.403 | 18       | 1148.403 | 18.02    | 1148.403 |
| 1148.403 | 18.04   | 1148.403 | 17.94517 | 1148.403 | 18.00193 | 1148.403 | 18.02384 | 1148.403 |
| 1148.403 | 18.0458 | 1148.403 | 17.95    | 1148.403 | 18.01    | 1148.403 | 18.03    | 1148.403 |
| 1148.403 | 18.05   | 1148.403 | 17.95517 | 1148.403 | 18.01193 | 1148.403 | 18.03384 | 1148.403 |
| 1148.403 | 18.0558 | 1148.403 | 17.96    | 1148.403 | 18.02    | 1148.403 | 18.04    | 1148.403 |
| 1148.403 | 18.06   | 1148.403 | 17.96517 | 1148.403 | 18.02193 | 1148.403 | 18.04384 | 1148.403 |
| 1148.403 | 18.0658 | 1148.403 | 17.97    | 1148.403 | 18.03    | 1148.403 | 18.05    | 1148.403 |
| 1148.403 | 18.07   | 1148.403 | 17.97517 | 1148.403 | 18.03193 | 1148.403 | 18.05384 | 1148.403 |
| 1148.403 | 18.0758 | 1148.403 | 17.98    | 1148.403 | 18.04    | 1148.403 | 18.06    | 1148.403 |
| 1148.403 | 18.08   | 1148.403 | 17.98517 | 1148.403 | 18.04193 | 1148.403 | 18.06384 | 1148.403 |
| 1148.403 | 18.0858 | 1148.403 | 17.99    | 1148.403 | 18.05    | 1148.403 | 18.07    | 1148.403 |
| 1148.403 | 18.09   | 1148.403 | 17.99517 | 1148.403 | 18.05193 | 1148.403 | 18.07384 | 1148.403 |
| 1148.403 | 18.0958 | 1148.403 | 18       | 1148.403 | 18.06    | 1148.403 | 18.08    | 1148.403 |
| 1148.403 | 18.1    | 1148.403 | 18.00517 | 1148.403 | 18.06193 | 1148.403 | 18.08384 | 1148.403 |
| 1148.403 | 18.1058 | 1148.403 | 18.01    | 1148.403 | 18.07    | 1148.403 | 18.09    | 1148.403 |
| 1148.403 | 18.11   | 1148.403 | 18.01517 | 1148.403 | 18.07193 | 1148.403 | 18.09384 | 1148.403 |
| 1148.403 | 18.1158 | 1148.403 | 18.02    | 1148.403 | 18.08    | 1148.403 | 18.1     | 1148.403 |
| 1148.403 | 18.12   | 1148.403 | 18.02517 | 1148.403 | 18.08193 | 1148.403 | 18.10384 | 1148.403 |
| 1148.403 | 18.1258 | 1148.403 | 18.03    | 1148.403 | 18.09    | 1148.403 | 18.11    | 1148.403 |
| 1148.403 | 18.13   | 1148.403 | 18.03517 | 1148.403 | 18.09193 | 1148.403 | 18.11384 | 1148.403 |
| 1148.403 | 18.1358 | 1148.403 | 18.04    | 1148.403 | 18.1     | 1148.403 | 18.12    | 1148.403 |
| 1148.403 | 18.14   | 1148.403 | 18.04517 | 1148.403 | 18.10193 | 1148.403 | 18.12384 | 1148.403 |
| 1148.403 | 18.1458 | 1148.403 | 18.05    | 1148.403 | 18.11    | 1148.403 | 18.13    | 1148.403 |
| 1148.403 | 18.15   | 1148.403 | 18.05517 | 1148.403 | 18.11193 | 1148.403 | 18.13384 | 1148.403 |
| 1148.403 | 18.1558 | 1148.403 | 18.06    | 1148.403 | 18.12    | 1148.403 | 18.14    | 1148.403 |
| 1148.403 | 18.16   | 1148.403 | 18.06517 | 1148.403 | 18.12193 | 1148.403 | 18.14384 | 1148.403 |
| 1148.403 | 18.1658 | 1148.403 | 18.07    | 1148.403 | 18.13    | 1148.403 | 18.15    | 1148.403 |
| 1148.403 | 18.17   | 1148.403 | 18.07517 | 1148.403 | 18.13193 | 1148.403 | 18.15384 | 1148.403 |
| 1148.403 | 18.1758 | 1148.403 | 18.08    | 1148.403 | 18.14    | 1148.403 | 18.16    | 1148.403 |
| 1148.403 | 18.18   | 1148.403 | 18.08517 | 1148.403 | 18.14193 | 1148.403 | 18.16384 | 1148.403 |
| 1148.403 | 18.1858 | 1148.403 | 18.09    | 1148.403 | 18.15    | 1148.403 | 18.17    | 1148.403 |
| 1148.403 | 18.19   | 1148.403 | 18.09517 | 1148.403 | 18.15193 | 1148.403 | 18.17384 | 1148.403 |
| 1148.403 | 18.1958 | 1148.403 | 18.1     | 1148.403 | 18.16    | 1148.403 | 18.18    | 1148.403 |
| 1148.403 | 18.2    | 1148.403 | 18.10517 | 1148.403 | 18.16193 | 1148.403 | 18.18384 | 1148.403 |
| 1148.403 | 18.2058 | 1148.403 | 18.11    | 1148.403 | 18.17    | 1148.403 | 18.19    | 1148.403 |
| 1148.403 | 18.21   | 1148.403 | 18.11517 | 1148.403 | 18.17193 | 1148.403 | 18.19384 | 1148.403 |
| 1148.403 | 18.2158 | 1148.403 | 18.12    | 1148.403 | 18.18    | 1148.403 | 18.2     | 1148.403 |
| 1148.403 | 18.22   | 1148.403 | 18.12517 | 1148.403 | 18.18193 | 1148.403 | 18.20384 | 1148.403 |
| 1148.403 | 18.2258 | 1148.403 | 18.13    | 1148.403 | 18.19    | 1148.403 | 18.21    | 1148.403 |
| 1148.403 | 18.23   | 1148.403 | 18.13517 | 1148.403 | 18.19193 | 1148.403 | 18.21384 | 1148.403 |
| 1148.403 | 18.2358 | 1148.403 | 18.14    | 1148.403 | 18.2     | 1148.403 | 18.22    | 1148.403 |
| 1148.403 | 18.24   | 1148.403 | 18.14517 | 1148.403 | 18.20193 | 1148.403 | 18.22384 | 1148.403 |

|          |         |          |          |          |          |          |          |          |
|----------|---------|----------|----------|----------|----------|----------|----------|----------|
| 1148.403 | 18.2458 | 1148.403 | 18.15    | 1148.403 | 18.21    | 1148.403 | 18.23    | 1148.403 |
| 1148.403 | 18.25   | 1148.403 | 18.15517 | 1148.403 | 18.21193 | 1148.403 | 18.23384 | 1148.403 |
| 1148.403 | 18.2558 | 1148.403 | 18.16    | 1148.403 | 18.22    | 1148.403 | 18.24    | 1148.403 |
| 1148.403 | 18.26   | 1148.403 | 18.16517 | 1148.403 | 18.22193 | 1148.403 | 18.24384 | 1148.403 |
| 1148.403 | 18.2658 | 1148.403 | 18.17    | 1148.403 | 18.23    | 1148.403 | 18.25    | 1148.403 |
| 1148.403 | 18.27   | 1148.403 | 18.17517 | 1148.403 | 18.23193 | 1148.403 | 18.25384 | 1148.403 |
| 1148.403 | 18.2758 | 1148.403 | 18.18    | 1148.403 | 18.24    | 1148.403 | 18.26    | 1148.403 |
| 1148.403 | 18.28   | 1148.403 | 18.18517 | 1148.403 | 18.24193 | 1148.403 | 18.26384 | 1148.403 |
| 1148.403 | 18.2858 | 1148.403 | 18.19    | 1148.403 | 18.25    | 1148.403 | 18.27    | 1148.403 |
| 1148.403 | 18.29   | 1148.403 | 18.19517 | 1148.403 | 18.25193 | 1148.403 | 18.27384 | 1148.403 |
| 1148.403 | 18.2958 | 1148.403 | 18.2     | 1148.403 | 18.26    | 1148.403 | 18.28    | 1148.403 |
| 1148.403 | 18.3    | 1148.403 | 18.20517 | 1148.403 | 18.26193 | 1148.403 | 18.28384 | 1148.403 |
| 1148.403 | 18.3058 | 1148.403 | 18.21    | 1148.403 | 18.27    | 1148.403 | 18.29    | 1148.403 |
| 1148.403 | 18.31   | 1148.403 | 18.21517 | 1148.403 | 18.27193 | 1148.403 | 18.29384 | 1148.403 |
| 1148.403 | 18.3158 | 1148.403 | 18.22    | 1148.403 | 18.28    | 1148.403 | 18.3     | 1148.403 |
| 1148.403 | 18.32   | 1148.403 | 18.22517 | 1148.403 | 18.28193 | 1148.403 | 18.30384 | 1148.403 |
| 1148.403 | 18.3258 | 1148.403 | 18.23    | 1148.403 | 18.29    | 1148.403 | 18.31    | 1148.403 |
| 1148.403 | 18.33   | 1148.403 | 18.23517 | 1148.403 | 18.29193 | 1148.403 | 18.31384 | 1148.403 |
| 1148.403 | 18.3358 | 1148.403 | 18.24    | 1148.403 | 18.3     | 1148.403 | 18.32    | 1148.403 |
| 1148.403 | 18.34   | 1148.403 | 18.24517 | 1148.403 | 18.30193 | 1148.403 | 18.32384 | 1148.403 |
| 1148.403 | 18.3458 | 1148.403 | 18.25    | 1148.403 | 18.31    | 1148.403 | 18.33    | 1148.403 |
| 1148.403 | 18.35   | 1148.403 | 18.25517 | 1148.403 | 18.31193 | 1148.403 | 18.33384 | 1148.403 |
| 1148.403 | 18.3558 | 1148.403 | 18.26    | 1148.403 | 18.32    | 1148.403 | 18.34    | 1148.403 |
| 1148.403 | 18.36   | 1148.403 | 18.26517 | 1148.403 | 18.32193 | 1148.403 | 18.34384 | 1148.403 |
| 1148.403 | 18.3658 | 1148.403 | 18.27    | 1148.403 | 18.33    | 1148.403 | 18.35    | 1148.403 |
| 1148.403 | 18.37   | 1148.403 | 18.27517 | 1148.403 | 18.33193 | 1148.403 | 18.35384 | 1148.403 |
| 1148.403 | 18.3758 | 1148.403 | 18.28    | 1148.403 | 18.34    | 1148.403 | 18.36    | 1148.403 |
| 1148.403 | 18.38   | 1148.403 | 18.28517 | 1148.403 | 18.34193 | 1148.403 | 18.36384 | 1148.403 |
| 1148.403 | 18.3858 | 1148.403 | 18.29    | 1148.403 | 18.35    | 1148.403 | 18.37    | 1148.403 |
| 1148.403 | 18.39   | 1148.403 | 18.29517 | 1148.403 | 18.35193 | 1148.403 | 18.37384 | 1148.403 |
| 1148.403 | 18.3958 | 1148.403 | 18.3     | 1148.403 | 18.36    | 1148.403 | 18.38    | 1148.403 |
| 1148.403 | 18.4    | 1148.403 | 18.30517 | 1148.403 | 18.36193 | 1148.403 | 18.38384 | 1148.403 |
| 1148.403 | 18.4058 | 1148.403 | 18.31    | 1148.403 | 18.37    | 1148.403 | 18.39    | 1148.403 |
| 1148.403 | 18.41   | 1148.403 | 18.31517 | 1148.403 | 18.37193 | 1148.403 | 18.39384 | 1148.403 |
| 1148.403 | 18.4158 | 1148.403 | 18.32    | 1148.403 | 18.38    | 1148.403 | 18.4     | 1148.403 |
| 1148.403 | 18.42   | 1148.403 | 18.32517 | 1148.403 | 18.38193 | 1148.403 | 18.40384 | 1148.403 |
| 1148.403 | 18.4258 | 1148.403 | 18.33    | 1148.403 | 18.39    | 1148.403 | 18.41    | 1148.403 |
| 1148.403 | 18.43   | 1148.403 | 18.33517 | 1148.403 | 18.39193 | 1148.403 | 18.41384 | 1148.403 |
| 1148.403 | 18.4358 | 1148.403 | 18.34    | 1148.403 | 18.4     | 1148.403 | 18.42    | 1148.403 |
| 1148.403 | 18.44   | 1148.403 | 18.34517 | 1148.403 | 18.40193 | 1148.403 | 18.42384 | 1148.403 |
| 1148.403 | 18.4458 | 1148.403 | 18.35    | 1148.403 | 18.41    | 1148.403 | 18.43    | 1148.403 |
| 1148.403 | 18.45   | 1148.403 | 18.35517 | 1148.403 | 18.41193 | 1148.403 | 18.43384 | 1148.403 |
| 1148.403 | 18.4558 | 1148.403 | 18.36    | 1148.403 | 18.42    | 1148.403 | 18.44    | 1148.403 |
| 1148.403 | 18.46   | 1148.403 | 18.36517 | 1148.403 | 18.42193 | 1148.403 | 18.44384 | 1148.403 |
| 1148.403 | 18.4658 | 1148.403 | 18.37    | 1148.403 | 18.43    | 1148.403 | 18.45    | 1148.403 |
| 1148.403 | 18.47   | 1148.403 | 18.37517 | 1148.403 | 18.43193 | 1148.403 | 18.45384 | 1148.403 |
| 1148.403 | 18.4758 | 1148.403 | 18.38    | 1148.403 | 18.44    | 1148.403 | 18.46    | 1148.403 |

|          |          |          |          |          |          |          |          |          |
|----------|----------|----------|----------|----------|----------|----------|----------|----------|
| 1148.403 | 18.48    | 1148.403 | 18.38517 | 1148.403 | 18.44193 | 1148.403 | 18.46384 | 1148.403 |
| 1148.403 | 18.4858  | 1148.403 | 18.39    | 1148.403 | 18.45    | 1148.403 | 18.47    | 1148.403 |
| 1148.403 | 18.49    | 1148.403 | 18.39517 | 1148.403 | 18.45193 | 1148.403 | 18.47384 | 1148.403 |
| 1148.403 | 18.4958  | 1148.403 | 18.4     | 1148.403 | 18.46    | 1148.403 | 18.48    | 1148.403 |
| 1148.403 | 18.5     | 1148.403 | 18.40517 | 1148.403 | 18.46193 | 1148.403 | 18.48384 | 1148.403 |
| 1148.403 | 18.5058  | 1148.403 | 18.41    | 1148.403 | 18.47    | 1148.403 | 18.49    | 1148.403 |
| 1148.403 | 18.51    | 1148.403 | 18.41517 | 1148.403 | 18.47193 | 1148.403 | 18.49384 | 1148.403 |
| 1148.403 | 18.5158  | 1148.403 | 18.42    | 1148.403 | 18.48    | 1148.403 | 18.5     | 1148.403 |
| 1148.403 | 18.52    | 1148.403 | 18.42517 | 1148.403 | 18.48193 | 1148.403 | 18.50384 | 1148.403 |
| 1148.403 | 18.5258  | 1148.403 | 18.43    | 1148.403 | 18.49    | 1148.403 | 18.51    | 1148.403 |
| 1148.403 | 18.53    | 1148.403 | 18.43517 | 1148.403 | 18.49193 | 1148.403 | 18.51384 | 1148.403 |
| 1148.403 | 18.5358  | 1148.403 | 18.44    | 1148.403 | 18.5     | 1148.403 | 18.52    | 1148.403 |
| 1148.403 | 18.54    | 1148.403 | 18.44517 | 1148.403 | 18.50193 | 1148.403 | 18.52384 | 1148.403 |
| 1148.403 | 18.5458  | 1148.403 | 18.45    | 1148.403 | 18.51    | 1148.403 | 18.53    | 1148.403 |
| 1148.403 | 18.55    | 1148.403 | 18.45517 | 1148.403 | 18.51193 | 1148.403 | 18.53384 | 1148.403 |
| 1148.403 | 18.5558  | 1148.403 | 18.46    | 1148.403 | 18.52    | 1148.403 | 18.54    | 1148.403 |
| 1148.403 | 18.56    | 1148.403 | 18.46517 | 1148.403 | 18.52193 | 1148.403 | 18.54384 | 1148.403 |
| 1148.403 | 18.5658  | 1148.403 | 18.47    | 1148.403 | 18.53    | 1148.403 | 18.55    | 1148.403 |
| 1148.403 | 18.57    | 1148.403 | 18.47517 | 1148.403 | 18.53193 | 1148.403 | 18.55384 | 1148.403 |
| 1148.403 | 18.5758  | 1148.403 | 18.48    | 1148.403 | 18.54    | 1148.403 | 18.56    | 1148.403 |
| 1148.403 | 18.58    | 1148.403 | 18.48517 | 1148.403 | 18.54193 | 1148.403 | 18.56384 | 1148.403 |
| 1148.403 | 18.5858  | 1148.403 | 18.49    | 1148.403 | 18.55    | 1148.403 | 18.57    | 1148.403 |
| 1148.403 | 18.59    | 1148.403 | 18.49517 | 1148.403 | 18.55193 | 1148.403 | 18.57384 | 1148.403 |
| 1148.403 | 18.5958  | 1148.403 | 18.5     | 1148.403 | 18.56    | 1148.403 | 18.58    | 1148.403 |
| 1148.403 | 18.6     | 1148.403 | 18.50517 | 1148.403 | 18.56193 | 1148.403 | 18.58384 | 1148.403 |
| 1148.403 | 18.6058  | 1148.403 | 18.51    | 1148.403 | 18.57    | 1148.403 | 18.59    | 1148.403 |
| 1148.403 | 18.61    | 1148.403 | 18.51517 | 1148.403 | 18.57193 | 1148.403 | 18.59384 | 1148.403 |
| 1148.403 | 18.6158  | 1148.403 | 18.52    | 1148.403 | 18.58    | 1148.403 | 18.6     | 1148.403 |
| 1148.403 | 18.62    | 1148.403 | 18.52517 | 1148.403 | 18.58193 | 1148.403 | 18.60384 | 1148.403 |
| 1148.403 | 18.6258  | 1148.403 | 18.53    | 1148.403 | 18.59    | 1148.403 | 18.61    | 1148.403 |
| 1148.403 | 18.63    | 1148.403 | 18.53517 | 1148.403 | 18.59193 | 1148.403 | 18.61384 | 1148.403 |
| 1148.403 | 18.6358  | 1148.403 | 18.54    | 1148.403 | 18.6     | 1148.403 | 18.62    | 1148.403 |
| 1148.403 | 18.64    | 1148.403 | 18.54517 | 1148.403 | 18.60193 | 1148.403 | 18.62384 | 1148.403 |
| 1148.403 | 18.6458  | 1148.403 | 18.55    | 1148.403 | 18.61    | 1148.403 | 18.63    | 1148.403 |
| 1148.403 | 18.65    | 1148.403 | 18.55517 | 1148.403 | 18.61193 | 1148.403 | 18.63384 | 1148.403 |
| 1148.403 | 18.6558  | 1148.403 | 18.56    | 1148.403 | 18.62    | 1148.403 | 18.64    | 1148.403 |
| 1148.403 | 18.66    | 1148.403 | 18.56517 | 1148.403 | 18.62193 | 1148.403 | 18.64384 | 1148.403 |
| 1148.403 | 18.6658  | 1148.403 | 18.57    | 1148.403 | 18.63    | 1148.403 | 18.65    | 1148.403 |
| 1148.403 | 18.67    | 1148.403 | 18.57517 | 1148.403 | 18.63193 | 1148.403 | 18.65384 | 1148.403 |
| 1148.403 | 18.6758  | 1148.403 | 18.58    | 1148.403 | 18.64    | 1148.403 | 18.66    | 1148.403 |
| 1148.403 | 18.68    | 1148.403 | 18.58517 | 1148.403 | 18.64193 | 1148.403 | 18.66384 | 1148.403 |
| 1148.403 | 18.6858  | 1148.403 | 18.59    | 1148.403 | 18.65    | 1148.403 | 18.67    | 1148.403 |
| 1148.403 | 18.68913 | 1148.403 | 18.59517 | 1148.403 | 18.65193 | 1148.403 | 18.67384 | 1148.403 |
| 1148.403 | 18.69041 | 1148.403 | 18.6     | 1148.403 | 18.66    | 1148.403 | 18.68    | 1148.403 |
| 1148.403 | 18.69328 | 1148.403 | 18.60517 | 1148.403 | 18.66193 | 1148.403 | 18.68384 | 1148.403 |
| 1148.403 | 18.7     | 1148.403 | 18.61    | 1148.403 | 18.67    | 1148.403 | 18.69    | 1148.403 |
| 1148.403 | 18.70328 | 1148.403 | 18.61517 | 1148.403 | 18.67193 | 1148.403 | 18.69384 | 1148.403 |

|          |          |          |          |          |          |          |          |          |
|----------|----------|----------|----------|----------|----------|----------|----------|----------|
| 1148.403 | 18.71    | 1148.403 | 18.62    | 1148.403 | 18.68    | 1148.403 | 18.7     | 1148.403 |
| 1148.403 | 18.71328 | 1148.403 | 18.62517 | 1148.403 | 18.68193 | 1148.403 | 18.70384 | 1148.403 |
| 1148.403 | 18.72    | 1148.403 | 18.63    | 1148.403 | 18.69    | 1148.403 | 18.71    | 1148.403 |
| 1148.403 | 18.72328 | 1148.403 | 18.63517 | 1148.403 | 18.69193 | 1148.403 | 18.71384 | 1148.403 |
| 1148.403 | 18.73    | 1148.403 | 18.64    | 1148.403 | 18.7     | 1148.403 | 18.72    | 1148.403 |
| 1148.403 | 18.73328 | 1148.403 | 18.64517 | 1148.403 | 18.70193 | 1148.403 | 18.72384 | 1148.403 |
| 1148.403 | 18.74    | 1148.403 | 18.65    | 1148.403 | 18.71    | 1148.403 | 18.73    | 1148.403 |
| 1148.403 | 18.74328 | 1148.403 | 18.65517 | 1148.403 | 18.71193 | 1148.403 | 18.73384 | 1148.403 |
| 1148.403 | 18.74517 | 1148.403 | 18.66    | 1148.403 | 18.72    | 1148.403 | 18.74    | 1148.403 |
| 1148.403 | 18.75    | 1148.403 | 18.66517 | 1148.403 | 18.72193 | 1148.403 | 18.74384 | 1148.403 |
| 1148.403 | 18.75216 | 1148.403 | 18.67    | 1148.403 | 18.73    | 1148.403 | 18.75    | 1148.403 |
| 1148.403 | 18.76    | 1148.403 | 18.67517 | 1148.403 | 18.73193 | 1148.403 | 18.75384 | 1148.403 |
| 1148.403 | 18.76216 | 1148.403 | 18.68    | 1148.403 | 18.74    | 1148.403 | 18.76    | 1148.403 |
| 1148.403 | 18.77    | 1148.403 | 18.68517 | 1148.403 | 18.74193 | 1148.403 | 18.76384 | 1148.403 |
| 1148.403 | 18.77216 | 1148.403 | 18.68625 | 1148.403 | 18.75    | 1148.403 | 18.77    | 1148.403 |
| 1148.403 | 18.78    | 1148.403 | 18.69    | 1148.403 | 18.75193 | 1148.403 | 18.77384 | 1148.403 |
| 1148.403 | 18.78216 | 1148.403 | 18.69123 | 1148.403 | 18.76    | 1148.403 | 18.77527 | 1148.403 |
| 1148.403 | 18.79    | 1148.403 | 18.69876 | 1148.403 | 18.76193 | 1148.403 | 18.78    | 1148.403 |
| 1148.403 | 18.79216 | 1148.403 | 18.7     | 1148.403 | 18.77    | 1148.403 | 18.78163 | 1148.403 |
| 1148.403 | 18.8     | 1148.403 | 18.70108 | 1148.403 | 18.77193 | 1148.403 | 18.79    | 1148.403 |
| 1148.403 | 18.80216 | 1148.403 | 18.70861 | 1148.403 | 18.78    | 1148.403 | 18.79163 | 1148.403 |
| 1148.403 | 18.81    | 1148.403 | 18.71    | 1148.403 | 18.78193 | 1148.403 | 18.8     | 1148.403 |
| 1148.403 | 18.81216 | 1148.403 | 18.71108 | 1148.403 | 18.79    | 1148.403 | 18.80163 | 1148.403 |
| 1148.403 | 18.82    | 1148.403 | 18.71861 | 1148.403 | 18.79193 | 1148.403 | 18.80324 | 1148.403 |
| 1148.403 | 18.82216 | 1148.403 | 18.72    | 1148.403 | 18.8     | 1148.403 | 18.81    | 1148.403 |
| 1148.403 | 18.83    | 1148.403 | 18.72108 | 1148.403 | 18.80193 | 1148.403 | 18.81183 | 1148.403 |
| 1148.403 | 18.83216 | 1148.403 | 18.72861 | 1148.403 | 18.81    | 1148.403 | 18.82    | 1148.403 |
| 1148.403 | 18.84    | 1148.403 | 18.73    | 1148.403 | 18.81193 | 1148.403 | 18.82183 | 1148.403 |
| 1148.403 | 18.84216 | 1148.403 | 18.73108 | 1148.403 | 18.82    | 1148.403 | 18.83    | 1148.403 |
| 1148.403 | 18.85    | 1148.403 | 18.73861 | 1148.403 | 18.82193 | 1148.403 | 18.83183 | 1148.403 |
| 1148.403 | 18.85216 | 1148.403 | 18.74    | 1148.403 | 18.83    | 1148.403 | 18.84    | 1148.403 |
| 1148.403 | 18.86    | 1148.403 | 18.74108 | 1148.403 | 18.83193 | 1148.403 | 18.84183 | 1148.403 |
| 1148.403 | 18.86216 | 1148.403 | 18.74861 | 1148.403 | 18.83357 | 1148.403 | 18.85    | 1148.403 |
| 1148.403 | 18.87    | 1148.403 | 18.75    | 1148.403 | 18.84    | 1148.403 | 18.85183 | 1148.403 |
| 1148.403 | 18.87216 | 1148.403 | 18.75108 | 1148.403 | 18.84187 | 1148.403 | 18.86    | 1148.403 |
| 1148.403 | 18.88    | 1148.403 | 18.75861 | 1148.403 | 18.85    | 1148.403 | 18.86183 | 1148.403 |
| 1148.403 | 18.88216 | 1148.403 | 18.76    | 1148.403 | 18.85187 | 1148.403 | 18.87    | 1148.403 |
| 1148.403 | 18.89    | 1148.403 | 18.76108 | 1148.403 | 18.86    | 1148.403 | 18.87183 | 1148.403 |
| 1148.403 | 18.89216 | 1148.403 | 18.76861 | 1148.403 | 18.86187 | 1148.403 | 18.88    | 1148.403 |
| 1148.403 | 18.9     | 1148.403 | 18.77    | 1148.403 | 18.87    | 1148.403 | 18.88183 | 1148.403 |
| 1148.403 | 18.90216 | 1148.403 | 18.77108 | 1148.403 | 18.87187 | 1148.403 | 18.89    | 1148.403 |
| 1148.403 | 18.91    | 1148.403 | 18.77409 | 1148.403 | 18.88    | 1148.403 | 18.89183 | 1148.403 |
| 1148.403 | 18.91216 | 1148.403 | 18.78    | 1148.403 | 18.88187 | 1148.403 | 18.9     | 1148.403 |
| 1148.403 | 18.92    | 1148.403 | 18.78345 | 1148.403 | 18.89    | 1148.403 | 18.90183 | 1148.403 |
| 1148.403 | 18.92216 | 1148.403 | 18.79    | 1148.403 | 18.89187 | 1148.403 | 18.91    | 1148.403 |
| 1148.403 | 18.93    | 1148.403 | 18.79345 | 1148.403 | 18.9     | 1148.403 | 18.91183 | 1148.403 |
| 1148.403 | 18.93216 | 1148.403 | 18.8     | 1148.403 | 18.90187 | 1148.403 | 18.92    | 1148.403 |

|          |          |          |          |          |          |          |          |          |
|----------|----------|----------|----------|----------|----------|----------|----------|----------|
| 1148.403 | 18.94    | 1148.403 | 18.80345 | 1148.403 | 18.90367 | 1148.403 | 18.92183 | 1148.403 |
| 1148.403 | 18.94216 | 1148.403 | 18.81    | 1148.403 | 18.91    | 1148.403 | 18.93    | 1148.403 |
| 1148.403 | 18.95    | 1148.403 | 18.81345 | 1148.403 | 18.91206 | 1148.403 | 18.93183 | 1148.403 |
| 1148.403 | 18.95216 | 1148.403 | 18.82    | 1148.403 | 18.92    | 1148.403 | 18.94    | 1148.403 |
| 1148.403 | 18.96    | 1148.403 | 18.82345 | 1148.403 | 18.92206 | 1148.403 | 18.94183 | 1148.403 |
| 1148.403 | 18.96216 | 1148.403 | 18.83    | 1148.403 | 18.93    | 1148.403 | 18.95    | 1148.403 |
| 1148.403 | 18.97    | 1148.403 | 18.83345 | 1148.403 | 18.93206 | 1148.403 | 18.95183 | 1148.403 |
| 1148.403 | 18.97216 | 1148.403 | 18.84    | 1148.403 | 18.94    | 1148.403 | 18.96    | 1148.403 |
| 1148.403 | 18.98    | 1148.403 | 18.84345 | 1148.403 | 18.94206 | 1148.403 | 18.96183 | 1148.403 |
| 1148.403 | 18.98216 | 1148.403 | 18.85    | 1148.403 | 18.95    | 1148.403 | 18.97    | 1148.403 |
| 1148.403 | 18.99    | 1148.403 | 18.85345 | 1148.403 | 18.95206 | 1148.403 | 18.97183 | 1148.403 |
| 1148.403 | 18.99216 | 1148.403 | 18.86    | 1148.403 | 18.96    | 1148.403 | 18.98    | 1148.403 |
| 1148.403 | 19       | 1148.403 | 18.86345 | 1148.403 | 18.96206 | 1148.403 | 18.98183 | 1148.403 |
| 1148.403 | 19.00216 | 1148.403 | 18.86496 | 1148.403 | 18.97    | 1148.403 | 18.99    | 1148.403 |
| 1148.403 | 19.01    | 1148.403 | 18.87    | 1148.403 | 18.97206 | 1148.403 | 18.99183 | 1148.403 |
| 1148.403 | 19.01216 | 1148.403 | 18.87172 | 1148.403 | 18.98    | 1148.403 | 19       | 1148.403 |
| 1148.403 | 19.02    | 1148.403 | 18.88    | 1148.403 | 18.98206 | 1148.403 | 19.00183 | 1148.403 |
| 1148.403 | 19.02216 | 1148.403 | 18.88172 | 1148.403 | 18.99    | 1148.403 | 19.01    | 1148.403 |
| 1148.403 | 19.03    | 1148.403 | 18.89    | 1148.403 | 18.99206 | 1148.403 | 19.01183 | 1148.403 |
| 1148.403 | 19.03216 | 1148.403 | 18.89172 | 1148.403 | 19       | 1148.403 | 19.02    | 1148.403 |
| 1148.403 | 19.04    | 1148.403 | 18.9     | 1148.403 | 19.00206 | 1148.403 | 19.02183 | 1148.403 |
| 1148.403 | 19.04216 | 1148.403 | 18.90172 | 1148.403 | 19.01    | 1148.403 | 19.03    | 1148.403 |
| 1148.403 | 19.05    | 1148.403 | 18.91    | 1148.403 | 19.01206 | 1148.403 | 19.03183 | 1148.403 |
| 1148.403 | 19.05216 | 1148.403 | 18.91172 | 1148.403 | 19.02    | 1148.403 | 19.04    | 1148.403 |
| 1148.403 | 19.06    | 1148.403 | 18.92    | 1148.403 | 19.02206 | 1148.403 | 19.04183 | 1148.403 |
| 1148.403 | 19.06216 | 1148.403 | 18.92172 | 1148.403 | 19.03    | 1148.403 | 19.05    | 1148.403 |
| 1148.403 | 19.07    | 1148.403 | 18.93    | 1148.403 | 19.03206 | 1148.403 | 19.05183 | 1148.403 |
| 1148.403 | 19.07216 | 1148.403 | 18.93172 | 1148.403 | 19.04    | 1148.403 | 19.06    | 1148.403 |
| 1148.403 | 19.08    | 1148.403 | 18.94    | 1148.403 | 19.04206 | 1148.403 | 19.06183 | 1148.403 |
| 1148.403 | 19.08216 | 1148.403 | 18.94172 | 1148.403 | 19.05    | 1148.403 | 19.07    | 1148.403 |
| 1148.403 | 19.09    | 1148.403 | 18.95    | 1148.403 | 19.05206 | 1148.403 | 19.07183 | 1148.403 |
| 1148.403 | 19.09216 | 1148.403 | 18.95172 | 1148.403 | 19.06    | 1148.403 | 19.08    | 1148.403 |
| 1148.403 | 19.1     | 1148.403 | 18.96    | 1148.403 | 19.06206 | 1148.403 | 19.08183 | 1148.403 |
| 1148.403 | 19.10216 | 1148.403 | 18.96172 | 1148.403 | 19.07    | 1148.403 | 19.09    | 1148.403 |
| 1148.403 | 19.11    | 1148.403 | 18.97    | 1148.403 | 19.07206 | 1148.403 | 19.09183 | 1148.403 |
| 1148.403 | 19.11216 | 1148.403 | 18.97172 | 1148.403 | 19.08    | 1148.403 | 19.1     | 1148.403 |
| 1148.403 | 19.12    | 1148.403 | 18.98    | 1148.403 | 19.08206 | 1148.403 | 19.10183 | 1148.403 |
| 1148.403 | 19.12216 | 1148.403 | 18.98172 | 1148.403 | 19.09    | 1148.403 | 19.11    | 1148.403 |
| 1148.403 | 19.13    | 1148.403 | 18.99    | 1148.403 | 19.09206 | 1148.403 | 19.11183 | 1148.403 |
| 1148.403 | 19.13216 | 1148.403 | 18.99172 | 1148.403 | 19.1     | 1148.403 | 19.12    | 1148.403 |
| 1148.403 | 19.14    | 1148.403 | 19       | 1148.403 | 19.10206 | 1148.403 | 19.12183 | 1148.403 |
| 1148.403 | 19.14216 | 1148.403 | 19.00172 | 1148.403 | 19.11    | 1148.403 | 19.13    | 1148.403 |
| 1148.403 | 19.15    | 1148.403 | 19.01    | 1148.403 | 19.11206 | 1148.403 | 19.13183 | 1148.403 |
| 1148.403 | 19.15216 | 1148.403 | 19.01172 | 1148.403 | 19.12    | 1148.403 | 19.14    | 1148.403 |
| 1148.403 | 19.16    | 1148.403 | 19.02    | 1148.403 | 19.12206 | 1148.403 | 19.14183 | 1148.403 |
| 1148.403 | 19.16216 | 1148.403 | 19.02172 | 1148.403 | 19.13    | 1148.403 | 19.15    | 1148.403 |
| 1148.403 | 19.17    | 1148.403 | 19.03    | 1148.403 | 19.13206 | 1148.403 | 19.15183 | 1148.403 |

|          |          |          |          |          |          |          |          |          |
|----------|----------|----------|----------|----------|----------|----------|----------|----------|
| 1148.403 | 19.17216 | 1148.403 | 19.03172 | 1148.403 | 19.14    | 1148.403 | 19.16    | 1148.403 |
| 1148.403 | 19.18    | 1148.403 | 19.04    | 1148.403 | 19.14206 | 1148.403 | 19.16183 | 1148.403 |
| 1148.403 | 19.18216 | 1148.403 | 19.04172 | 1148.403 | 19.15    | 1148.403 | 19.17    | 1148.403 |
| 1148.403 | 19.19    | 1148.403 | 19.05    | 1148.403 | 19.15206 | 1148.403 | 19.17183 | 1148.403 |
| 1148.403 | 19.19216 | 1148.403 | 19.05172 | 1148.403 | 19.16    | 1148.403 | 19.18    | 1148.403 |
| 1148.403 | 19.2     | 1148.403 | 19.06    | 1148.403 | 19.16206 | 1148.403 | 19.18183 | 1148.403 |
| 1148.403 | 19.20216 | 1148.403 | 19.06172 | 1148.403 | 19.17    | 1148.403 | 19.19    | 1148.403 |
| 1148.403 | 19.21    | 1148.403 | 19.07    | 1148.403 | 19.17206 | 1148.403 | 19.19183 | 1148.403 |
| 1148.403 | 19.21216 | 1148.403 | 19.07172 | 1148.403 | 19.18    | 1148.403 | 19.2     | 1148.403 |
| 1148.403 | 19.22    | 1148.403 | 19.08    | 1148.403 | 19.18206 | 1148.403 | 19.20183 | 1148.403 |
| 1148.403 | 19.22216 | 1148.403 | 19.08172 | 1148.403 | 19.19    | 1148.403 | 19.21    | 1148.403 |
| 1148.403 | 19.23    | 1148.403 | 19.09    | 1148.403 | 19.19206 | 1148.403 | 19.21183 | 1148.403 |
| 1148.403 | 19.23216 | 1148.403 | 19.09172 | 1148.403 | 19.2     | 1148.403 | 19.22    | 1148.403 |
| 1148.403 | 19.24    | 1148.403 | 19.1     | 1148.403 | 19.20206 | 1148.403 | 19.22183 | 1148.403 |
| 1148.403 | 19.24216 | 1148.403 | 19.10172 | 1148.403 | 19.21    | 1148.403 | 19.23    | 1148.403 |
| 1148.403 | 19.25    | 1148.403 | 19.11    | 1148.403 | 19.21206 | 1148.403 | 19.23183 | 1148.403 |
| 1148.403 | 19.25216 | 1148.403 | 19.11172 | 1148.403 | 19.22    | 1148.403 | 19.24    | 1148.403 |
| 1148.403 | 19.26    | 1148.403 | 19.12    | 1148.403 | 19.22206 | 1148.403 | 19.24183 | 1148.403 |
| 1148.403 | 19.26216 | 1148.403 | 19.12172 | 1148.403 | 19.23    | 1148.403 | 19.25    | 1148.403 |
| 1148.403 | 19.27    | 1148.403 | 19.13    | 1148.403 | 19.23206 | 1148.403 | 19.25183 | 1148.403 |
| 1148.403 | 19.27216 | 1148.403 | 19.13172 | 1148.403 | 19.24    | 1148.403 | 19.26    | 1148.403 |
| 1148.403 | 19.28    | 1148.403 | 19.14    | 1148.403 | 19.24206 | 1148.403 | 19.26183 | 1148.403 |
| 1148.403 | 19.28216 | 1148.403 | 19.14172 | 1148.403 | 19.25    | 1148.403 | 19.27    | 1148.403 |
| 1148.403 | 19.29    | 1148.403 | 19.15    | 1148.403 | 19.25206 | 1148.403 | 19.27183 | 1148.403 |
| 1148.403 | 19.29216 | 1148.403 | 19.15172 | 1148.403 | 19.26    | 1148.403 | 19.28    | 1148.403 |
| 1148.403 | 19.3     | 1148.403 | 19.16    | 1148.403 | 19.26206 | 1148.403 | 19.28183 | 1148.403 |
| 1148.403 | 19.30216 | 1148.403 | 19.16172 | 1148.403 | 19.27    | 1148.403 | 19.29    | 1148.403 |
| 1148.403 | 19.31    | 1148.403 | 19.17    | 1148.403 | 19.27206 | 1148.403 | 19.29183 | 1148.403 |
| 1148.403 | 19.31216 | 1148.403 | 19.17172 | 1148.403 | 19.28    | 1148.403 | 19.3     | 1148.403 |
| 1148.403 | 19.32    | 1148.403 | 19.18    | 1148.403 | 19.28206 | 1148.403 | 19.30183 | 1148.403 |
| 1148.403 | 19.32216 | 1148.403 | 19.18172 | 1148.403 | 19.29    | 1148.403 | 19.31    | 1148.403 |
| 1148.403 | 19.33    | 1148.403 | 19.19    | 1148.403 | 19.29206 | 1148.403 | 19.31183 | 1148.403 |
| 1148.403 | 19.33216 | 1148.403 | 19.19172 | 1148.403 | 19.3     | 1148.403 | 19.32    | 1148.403 |
| 1148.403 | 19.34    | 1148.403 | 19.2     | 1148.403 | 19.30206 | 1148.403 | 19.32183 | 1148.403 |
| 1148.403 | 19.34216 | 1148.403 | 19.20172 | 1148.403 | 19.31    | 1148.403 | 19.33    | 1148.403 |
| 1148.403 | 19.35    | 1148.403 | 19.21    | 1148.403 | 19.31206 | 1148.403 | 19.33183 | 1148.403 |
| 1148.403 | 19.35216 | 1148.403 | 19.21172 | 1148.403 | 19.32    | 1148.403 | 19.34    | 1148.403 |
| 1148.403 | 19.36    | 1148.403 | 19.22    | 1148.403 | 19.32206 | 1148.403 | 19.34183 | 1148.403 |
| 1148.403 | 19.36216 | 1148.403 | 19.22172 | 1148.403 | 19.33    | 1148.403 | 19.35    | 1148.403 |
| 1148.403 | 19.37    | 1148.403 | 19.23    | 1148.403 | 19.33206 | 1148.403 | 19.35183 | 1148.403 |
| 1148.403 | 19.37216 | 1148.403 | 19.23172 | 1148.403 | 19.34    | 1148.403 | 19.36    | 1148.403 |
| 1148.403 | 19.38    | 1148.403 | 19.24    | 1148.403 | 19.34206 | 1148.403 | 19.36183 | 1148.403 |
| 1148.403 | 19.38216 | 1148.403 | 19.24172 | 1148.403 | 19.35    | 1148.403 | 19.37    | 1148.403 |
| 1148.403 | 19.39    | 1148.403 | 19.25    | 1148.403 | 19.35206 | 1148.403 | 19.37183 | 1148.403 |
| 1148.403 | 19.39216 | 1148.403 | 19.25172 | 1148.403 | 19.36    | 1148.403 | 19.38    | 1148.403 |
| 1148.403 | 19.4     | 1148.403 | 19.26    | 1148.403 | 19.36206 | 1148.403 | 19.38183 | 1148.403 |
| 1148.403 | 19.40216 | 1148.403 | 19.26172 | 1148.403 | 19.37    | 1148.403 | 19.39    | 1148.403 |

|          |          |          |          |          |          |          |          |          |
|----------|----------|----------|----------|----------|----------|----------|----------|----------|
| 1148.403 | 19.41    | 1148.403 | 19.27    | 1148.403 | 19.37206 | 1148.403 | 19.39183 | 1148.403 |
| 1148.403 | 19.41216 | 1148.403 | 19.27172 | 1148.403 | 19.38    | 1148.403 | 19.4     | 1148.403 |
| 1148.403 | 19.42    | 1148.403 | 19.28    | 1148.403 | 19.38206 | 1148.403 | 19.40183 | 1148.403 |
| 1148.403 | 19.42216 | 1148.403 | 19.28172 | 1148.403 | 19.39    | 1148.403 | 19.41    | 1148.403 |
| 1148.403 | 19.43    | 1148.403 | 19.29    | 1148.403 | 19.39206 | 1148.403 | 19.41183 | 1148.403 |
| 1148.403 | 19.43216 | 1148.403 | 19.29172 | 1148.403 | 19.4     | 1148.403 | 19.42    | 1148.403 |
| 1148.403 | 19.44    | 1148.403 | 19.3     | 1148.403 | 19.40206 | 1148.403 | 19.42183 | 1148.403 |
| 1148.403 | 19.44216 | 1148.403 | 19.30172 | 1148.403 | 19.41    | 1148.403 | 19.43    | 1148.403 |
| 1148.403 | 19.45    | 1148.403 | 19.31    | 1148.403 | 19.41206 | 1148.403 | 19.43183 | 1148.403 |
| 1148.403 | 19.45216 | 1148.403 | 19.31172 | 1148.403 | 19.42    | 1148.403 | 19.44    | 1148.403 |
| 1148.403 | 19.46    | 1148.403 | 19.32    | 1148.403 | 19.42206 | 1148.403 | 19.44183 | 1148.403 |
| 1148.403 | 19.46216 | 1148.403 | 19.32172 | 1148.403 | 19.43    | 1148.403 | 19.45    | 1148.403 |
| 1148.403 | 19.47    | 1148.403 | 19.33    | 1148.403 | 19.43206 | 1148.403 | 19.45183 | 1148.403 |
| 1148.403 | 19.47216 | 1148.403 | 19.33172 | 1148.403 | 19.44    | 1148.403 | 19.46    | 1148.403 |
| 1148.403 | 19.48    | 1148.403 | 19.34    | 1148.403 | 19.44206 | 1148.403 | 19.46183 | 1148.403 |
| 1148.403 | 19.48216 | 1148.403 | 19.34172 | 1148.403 | 19.45    | 1148.403 | 19.47    | 1148.403 |
| 1148.403 | 19.49    | 1148.403 | 19.35    | 1148.403 | 19.45206 | 1148.403 | 19.47183 | 1148.403 |
| 1148.403 | 19.49216 | 1148.403 | 19.35172 | 1148.403 | 19.46    | 1148.403 | 19.48    | 1148.403 |
| 1148.403 | 19.5     | 1148.403 | 19.36    | 1148.403 | 19.46206 | 1148.403 | 19.48183 | 1148.403 |
| 1148.403 | 19.50216 | 1148.403 | 19.36172 | 1148.403 | 19.47    | 1148.403 | 19.49    | 1148.403 |
| 1148.403 | 19.51    | 1148.403 | 19.37    | 1148.403 | 19.47206 | 1148.403 | 19.49183 | 1148.403 |
| 1148.403 | 19.51216 | 1148.403 | 19.37172 | 1148.403 | 19.48    | 1148.403 | 19.5     | 1148.403 |
| 1148.403 | 19.52    | 1148.403 | 19.38    | 1148.403 | 19.48206 | 1148.403 | 19.50183 | 1148.403 |
| 1148.403 | 19.52216 | 1148.403 | 19.38172 | 1148.403 | 19.49    | 1148.403 | 19.51    | 1148.403 |
| 1148.403 | 19.53    | 1148.403 | 19.39    | 1148.403 | 19.49206 | 1148.403 | 19.51183 | 1148.403 |
| 1148.403 | 19.53216 | 1148.403 | 19.39172 | 1148.403 | 19.5     | 1148.403 | 19.52    | 1148.403 |
| 1148.403 | 19.54    | 1148.403 | 19.4     | 1148.403 | 19.50206 | 1148.403 | 19.52183 | 1148.403 |
| 1148.403 | 19.54216 | 1148.403 | 19.40172 | 1148.403 | 19.51    | 1148.403 | 19.53    | 1148.403 |
| 1148.403 | 19.55    | 1148.403 | 19.41    | 1148.403 | 19.51206 | 1148.403 | 19.53183 | 1148.403 |
| 1148.403 | 19.55216 | 1148.403 | 19.41172 | 1148.403 | 19.52    | 1148.403 | 19.54    | 1148.403 |
| 1148.403 | 19.56    | 1148.403 | 19.42    | 1148.403 | 19.52206 | 1148.403 | 19.54183 | 1148.403 |
| 1148.403 | 19.56216 | 1148.403 | 19.42172 | 1148.403 | 19.53    | 1148.403 | 19.55    | 1148.403 |
| 1148.403 | 19.57    | 1148.403 | 19.43    | 1148.403 | 19.53206 | 1148.403 | 19.55183 | 1148.403 |
| 1148.403 | 19.57216 | 1148.403 | 19.43172 | 1148.403 | 19.54    | 1148.403 | 19.56    | 1148.403 |
| 1148.403 | 19.58    | 1148.403 | 19.44    | 1148.403 | 19.54206 | 1148.403 | 19.56183 | 1148.403 |
| 1148.403 | 19.58216 | 1148.403 | 19.44172 | 1148.403 | 19.55    | 1148.403 | 19.57    | 1148.403 |
| 1148.403 | 19.59    | 1148.403 | 19.45    | 1148.403 | 19.55206 | 1148.403 | 19.57183 | 1148.403 |
| 1148.403 | 19.59216 | 1148.403 | 19.45172 | 1148.403 | 19.56    | 1148.403 | 19.58    | 1148.403 |
| 1148.403 | 19.6     | 1148.403 | 19.46    | 1148.403 | 19.56206 | 1148.403 | 19.58183 | 1148.403 |
| 1148.403 | 19.60216 | 1148.403 | 19.46172 | 1148.403 | 19.57    | 1148.403 | 19.59    | 1148.403 |
| 1148.403 | 19.61    | 1148.403 | 19.46361 | 1148.403 | 19.57206 | 1148.403 | 19.59183 | 1148.403 |
| 1148.403 | 19.61216 | 1148.403 | 19.47    | 1148.403 | 19.58    | 1148.403 | 19.6     | 1148.403 |
| 1148.403 | 19.62    | 1148.403 | 19.47172 | 1148.403 | 19.58206 | 1148.403 | 19.60183 | 1148.403 |
| 1148.403 | 19.62216 | 1148.403 | 19.48    | 1148.403 | 19.59    | 1148.403 | 19.61    | 1148.403 |
| 1148.403 | 19.63    | 1148.403 | 19.48172 | 1148.403 | 19.59206 | 1148.403 | 19.61183 | 1148.403 |
| 1148.403 | 19.63216 | 1148.403 | 19.49    | 1148.403 | 19.6     | 1148.403 | 19.62    | 1148.403 |
| 1148.403 | 19.64    | 1148.403 | 19.49172 | 1148.403 | 19.60206 | 1148.403 | 19.62183 | 1148.403 |

|          |          |          |          |          |          |          |          |          |
|----------|----------|----------|----------|----------|----------|----------|----------|----------|
| 1148.403 | 19.64216 | 1148.403 | 19.5     | 1148.403 | 19.61    | 1148.403 | 19.63    | 1148.403 |
| 1148.403 | 19.6438  | 1148.403 | 19.50172 | 1148.403 | 19.61206 | 1148.403 | 19.63183 | 1148.403 |
| 1148.403 | 19.65    | 1148.403 | 19.51    | 1148.403 | 19.62    | 1148.403 | 19.64    | 1148.403 |
| 1148.403 | 19.65142 | 1148.403 | 19.51172 | 1148.403 | 19.62206 | 1148.403 | 19.64183 | 1148.403 |
| 1148.403 | 19.6563  | 1148.403 | 19.52    | 1148.403 | 19.63    | 1148.403 | 19.65    | 1148.403 |
| 1148.403 | 19.66    | 1148.403 | 19.52172 | 1148.403 | 19.63206 | 1148.403 | 19.65183 | 1148.403 |
| 1148.403 | 19.66469 | 1148.403 | 19.53    | 1148.403 | 19.64    | 1148.403 | 19.66    | 1148.403 |
| 1148.403 | 19.66938 | 1148.403 | 19.53172 | 1148.403 | 19.64206 | 1148.403 | 19.66183 | 1148.403 |
| 1148.403 | 19.67059 | 1148.403 | 19.54    | 1148.403 | 19.65    | 1148.403 | 19.67    | 1148.403 |
| 1148.403 | 19.67219 | 1148.403 | 19.54172 | 1148.403 | 19.65206 | 1148.403 | 19.67183 | 1148.403 |
| 1148.403 | 19.68    | 1148.403 | 19.55    | 1148.403 | 19.66    | 1148.403 | 19.68    | 1148.403 |
| 1148.403 | 19.68183 | 1148.403 | 19.55172 | 1148.403 | 19.66206 | 1148.403 | 19.68183 | 1148.403 |
| 1148.403 | 19.69    | 1148.403 | 19.56    | 1148.403 | 19.67    | 1148.403 | 19.69    | 1148.403 |
| 1148.403 | 19.69183 | 1148.403 | 19.56172 | 1148.403 | 19.67206 | 1148.403 | 19.69183 | 1148.403 |
| 1148.403 | 19.7     | 1148.403 | 19.57    | 1148.403 | 19.68    | 1148.403 | 19.7     | 1148.403 |
| 1148.403 | 19.70183 | 1148.403 | 19.57172 | 1148.403 | 19.68206 | 1148.403 | 19.70183 | 1148.403 |
| 1148.403 | 19.71    | 1148.403 | 19.58    | 1148.403 | 19.69    | 1148.403 | 19.71    | 1148.403 |
| 1148.403 | 19.71183 | 1148.403 | 19.58172 | 1148.403 | 19.69206 | 1148.403 | 19.71183 | 1148.403 |
| 1148.403 | 19.72    | 1148.403 | 19.59    | 1148.403 | 19.7     | 1148.403 | 19.71573 | 1148.403 |
| 1148.403 | 19.72183 | 1148.403 | 19.59172 | 1148.403 | 19.70206 | 1148.403 | 19.72    | 1148.403 |
| 1148.403 | 19.73    | 1148.403 | 19.6     | 1148.403 | 19.71    | 1148.403 | 19.72375 | 1148.403 |
| 1148.403 | 19.73183 | 1148.403 | 19.60172 | 1148.403 | 19.71206 | 1148.403 | 19.72505 | 1148.403 |
| 1148.403 | 19.74    | 1148.403 | 19.61    | 1148.403 | 19.72    | 1148.403 | 19.7288  | 1148.403 |
| 1148.403 | 19.74183 | 1148.403 | 19.61172 | 1148.403 | 19.72206 | 1148.403 | 19.73    | 1148.403 |
| 1148.403 | 19.75    | 1148.403 | 19.62    | 1148.403 | 19.73    | 1148.403 | 19.73189 | 1148.403 |
| 1148.403 | 19.75183 | 1148.403 | 19.62172 | 1148.403 | 19.73206 | 1148.403 | 19.74    | 1148.403 |
| 1148.403 | 19.76    | 1148.403 | 19.63    | 1148.403 | 19.74    | 1148.403 | 19.74163 | 1148.403 |
| 1148.403 | 19.76183 | 1148.403 | 19.63172 | 1148.403 | 19.74206 | 1148.403 | 19.75    | 1148.403 |
| 1148.403 | 19.77    | 1148.403 | 19.64    | 1148.403 | 19.75    | 1148.403 | 19.75163 | 1148.403 |
| 1148.403 | 19.77183 | 1148.403 | 19.64172 | 1148.403 | 19.75206 | 1148.403 | 19.76    | 1148.403 |
| 1148.403 | 19.78    | 1148.403 | 19.65    | 1148.403 | 19.76    | 1148.403 | 19.76163 | 1148.403 |
| 1148.403 | 19.78183 | 1148.403 | 19.65172 | 1148.403 | 19.76206 | 1148.403 | 19.77    | 1148.403 |
| 1148.403 | 19.79    | 1148.403 | 19.66    | 1148.403 | 19.77    | 1148.403 | 19.77163 | 1148.403 |
| 1148.403 | 19.79183 | 1148.403 | 19.66172 | 1148.403 | 19.77206 | 1148.403 | 19.78    | 1148.403 |
| 1148.403 | 19.8     | 1148.403 | 19.67    | 1148.403 | 19.78    | 1148.403 | 19.78163 | 1148.403 |
| 1148.403 | 19.80183 | 1148.403 | 19.67172 | 1148.403 | 19.78206 | 1148.403 | 19.79    | 1148.403 |
| 1148.403 | 19.81    | 1148.403 | 19.67303 | 1148.403 | 19.79    | 1148.403 | 19.79163 | 1148.403 |
| 1148.403 | 19.81183 | 1148.403 | 19.67994 | 1148.403 | 19.79206 | 1148.403 | 19.8     | 1148.403 |
| 1148.403 | 19.82    | 1148.403 | 19.68099 | 1148.403 | 19.8     | 1148.403 | 19.80163 | 1148.403 |
| 1148.403 | 19.82183 | 1148.403 | 19.68791 | 1148.403 | 19.80206 | 1148.403 | 19.81    | 1148.403 |
| 1148.403 | 19.83    | 1148.403 | 19.69    | 1148.403 | 19.81    | 1148.403 | 19.81163 | 1148.403 |
| 1148.403 | 19.83183 | 1148.403 | 19.69791 | 1148.403 | 19.81206 | 1148.403 | 19.82    | 1148.403 |
| 1148.403 | 19.84    | 1148.403 | 19.7     | 1148.403 | 19.82    | 1148.403 | 19.82163 | 1148.403 |
| 1148.403 | 19.84183 | 1148.403 | 19.70791 | 1148.403 | 19.82206 | 1148.403 | 19.83    | 1148.403 |
| 1148.403 | 19.85    | 1148.403 | 19.71    | 1148.403 | 19.83    | 1148.403 | 19.83163 | 1148.403 |
| 1148.403 | 19.85183 | 1148.403 | 19.71791 | 1148.403 | 19.83206 | 1148.403 | 19.84    | 1148.403 |
| 1148.403 | 19.86    | 1148.403 | 19.72    | 1148.403 | 19.84    | 1148.403 | 19.84163 | 1148.403 |



|          |          |          |          |          |          |          |          |          |
|----------|----------|----------|----------|----------|----------|----------|----------|----------|
| 1148.403 | 19.86183 | 1148.403 | 19.72791 | 1148.403 | 19.84206 | 1148.403 | 19.85    | 1148.403 |
| 1148.403 | 19.87    | 1148.403 | 19.72962 | 1148.403 | 19.85    | 1148.403 | 19.85163 | 1148.403 |
| 1148.403 | 19.87183 | 1148.403 | 19.73113 | 1148.403 | 19.85206 | 1148.403 | 19.86    | 1148.403 |
| 1148.403 | 19.88    | 1148.403 | 19.73805 | 1148.403 | 19.86    | 1148.403 | 19.86163 | 1148.403 |
| 1148.403 | 19.88183 | 1148.403 | 19.74    | 1148.403 | 19.86206 | 1148.403 | 19.87    | 1148.403 |
| 1148.403 | 19.89    | 1148.403 | 19.74791 | 1148.403 | 19.87    | 1148.403 | 19.87163 | 1148.403 |
| 1148.403 | 19.89183 | 1148.403 | 19.75    | 1148.403 | 19.87206 | 1148.403 | 19.88    | 1148.403 |
| 1148.403 | 19.9     | 1148.403 | 19.75791 | 1148.403 | 19.88    | 1148.403 | 19.88163 | 1148.403 |
| 1148.403 | 19.90183 | 1148.403 | 19.76    | 1148.403 | 19.88206 | 1148.403 | 19.88302 | 1148.403 |
| 1148.403 | 19.91    | 1148.403 | 19.76791 | 1148.403 | 19.89    | 1148.403 | 19.89    | 1148.403 |
| 1148.403 | 19.91183 | 1148.403 | 19.77    | 1148.403 | 19.89206 | 1148.403 | 19.89122 | 1148.403 |
| 1148.403 | 19.92    | 1148.403 | 19.77791 | 1148.403 | 19.8937  | 1148.403 | 19.89374 | 1148.403 |
| 1148.403 | 19.92183 | 1148.403 | 19.78    | 1148.403 | 19.9     | 1148.403 | 19.9     | 1148.403 |
| 1148.403 | 19.93    | 1148.403 | 19.78791 | 1148.403 | 19.90143 | 1148.403 | 19.90241 | 1148.403 |
| 1148.403 | 19.93183 | 1148.403 | 19.79    | 1148.403 | 19.90493 | 1148.403 | 19.90737 | 1148.403 |
| 1148.403 | 19.94    | 1148.403 | 19.79791 | 1148.403 | 19.91    | 1148.403 | 19.91    | 1148.403 |
| 1148.403 | 19.94183 | 1148.403 | 19.8     | 1148.403 | 19.91336 | 1148.403 | 19.91191 | 1148.403 |
| 1148.403 | 19.95    | 1148.403 | 19.80791 | 1148.403 | 19.91461 | 1148.403 | 19.92    | 1148.403 |
| 1148.403 | 19.95183 | 1148.403 | 19.81    | 1148.403 | 19.92    | 1148.403 | 19.92151 | 1148.403 |
|          | 19.96    | 1148.403 | 19.81791 | 1148.403 | 19.92119 | 1148.403 | 19.93    | 1148.403 |
|          | 19.96183 | 1148.403 | 19.82    | 1148.403 | 19.9285  | 1148.403 | 19.93151 | 1148.403 |
|          | 19.97    | 1148.403 | 19.82791 | 1148.403 | 19.93    | 1148.403 | 19.94    | 1148.403 |
|          | 19.97183 | 1148.403 | 19.83    | 1148.403 | 19.93104 | 1148.403 | 19.94151 | 1148.403 |
|          | 19.98    | 1148.403 | 19.83791 | 1148.403 | 19.93835 | 1148.403 | 19.95    | 1148.403 |
|          | 19.98183 | 1148.403 | 19.84    | 1148.403 | 19.94    | 1148.403 | 19.95151 | 1148.403 |
|          | 19.99    | 1148.403 | 19.84791 | 1148.403 | 19.94104 | 1148.403 | 19.96    | 1148.403 |
|          | 19.99183 | 1148.403 | 19.85    | 1148.403 | 19.94835 | 1148.403 | 19.96151 | 1148.403 |
|          | 20       | 1148.403 | 19.85791 | 1148.403 | 19.95    | 1148.403 | 19.97    | 1148.403 |
|          |          |          | 19.86    | 1148.403 | 19.95104 | 1148.403 | 19.97151 | 1148.403 |
|          |          |          | 19.86791 | 1148.403 | 19.95835 | 1148.403 | 19.98    | 1148.403 |
|          |          |          | 19.87    | 1148.403 | 19.96    | 1148.403 | 19.98151 | 1148.403 |
|          |          |          | 19.87791 | 1148.403 | 19.96104 | 1148.403 | 19.99    | 1148.403 |
|          |          |          | 19.88    | 1148.403 | 19.96835 | 1148.403 | 19.99151 | 1148.403 |
|          |          |          | 19.88791 | 1148.403 | 19.97    | 1148.403 | 20       | 1148.403 |
|          |          |          | 19.89    | 1148.403 | 19.97104 | 1148.403 |          |          |
|          |          |          | 19.89791 | 1148.403 | 19.97835 | 1148.403 |          |          |
|          |          |          | 19.9     | 1148.403 | 19.98    | 1148.403 |          |          |
|          |          |          | 19.90791 | 1148.403 | 19.98104 | 1148.403 |          |          |
|          |          |          | 19.91    | 1148.403 | 19.98835 | 1148.403 |          |          |
|          |          |          | 19.91791 | 1148.403 | 19.99    | 1148.403 |          |          |
|          |          |          | 19.92    | 1148.403 | 19.99104 | 1148.403 |          |          |
|          |          |          | 19.92791 | 1148.403 | 19.99835 | 1148.403 |          |          |
|          |          |          | 19.93    | 1148.403 | 20       | 1148.403 |          |          |
|          |          |          | 19.93791 | 1148.403 |          |          |          |          |
|          |          |          | 19.94    | 1148.403 |          |          |          |          |
|          |          |          | 19.94791 | 1148.403 |          |          |          |          |
|          |          |          | 19.95    | 1148.403 |          |          |          |          |

|          |          |
|----------|----------|
| 19.95791 | 1148.403 |
| 19.96    | 1148.403 |
| 19.96791 | 1148.403 |
| 19.97    | 1148.403 |
| 19.97791 | 1148.403 |
| 19.98    | 1148.403 |
| 19.98791 | 1148.403 |
| 19.99    | 1148.403 |
| 19.99791 | 1148.403 |
| 20       | 1148.403 |

| L6:9.00s |         | L6:9.10s |         | L6:9.20s |         | L6:9.30s |         | L6:9.40s |  |
|----------|---------|----------|---------|----------|---------|----------|---------|----------|--|
| L7:9.90s |         | L7:9.00s |         | L7:9.00s |         | L7:9.00s |         | L7:9.00s |  |
| t        | J3.om   | t        | J3.om   | t        | J3.om   | t        | J3.om   | t        |  |
| s        | rpm     | s        | rpm     | s        | rpm     | s        | rpm     | s        |  |
| 0        | 1152.51 | 0        | 1152.51 | 0        | 1152.51 | 0        | 1152.51 | 0        |  |
| 0.006678 | 1152.51 | 0.006678 | 1152.51 | 0.006678 | 1152.51 | 0.006678 | 1152.51 | 0.006678 |  |
| 0.01     | 1152.51 | 0.01     | 1152.51 | 0.01     | 1152.51 | 0.01     | 1152.51 | 0.01     |  |
| 0.016678 | 1152.51 | 0.016678 | 1152.51 | 0.016678 | 1152.51 | 0.016678 | 1152.51 | 0.016678 |  |
| 0.02     | 1152.51 | 0.02     | 1152.51 | 0.02     | 1152.51 | 0.02     | 1152.51 | 0.02     |  |
| 0.026678 | 1152.51 | 0.026678 | 1152.51 | 0.026678 | 1152.51 | 0.026678 | 1152.51 | 0.026678 |  |
| 0.03     | 1152.51 | 0.03     | 1152.51 | 0.03     | 1152.51 | 0.03     | 1152.51 | 0.03     |  |
| 0.036678 | 1152.51 | 0.036678 | 1152.51 | 0.036678 | 1152.51 | 0.036678 | 1152.51 | 0.036678 |  |
| 0.04     | 1152.51 | 0.04     | 1152.51 | 0.04     | 1152.51 | 0.04     | 1152.51 | 0.04     |  |
| 0.046678 | 1152.51 | 0.046678 | 1152.51 | 0.046678 | 1152.51 | 0.046678 | 1152.51 | 0.046678 |  |
| 0.05     | 1152.51 | 0.05     | 1152.51 | 0.05     | 1152.51 | 0.05     | 1152.51 | 0.05     |  |
| 0.056678 | 1152.51 | 0.056678 | 1152.51 | 0.056678 | 1152.51 | 0.056678 | 1152.51 | 0.056678 |  |
| 0.06     | 1152.51 | 0.06     | 1152.51 | 0.06     | 1152.51 | 0.06     | 1152.51 | 0.06     |  |
| 0.066678 | 1152.51 | 0.066678 | 1152.51 | 0.066678 | 1152.51 | 0.066678 | 1152.51 | 0.066678 |  |
| 0.07     | 1152.51 | 0.07     | 1152.51 | 0.07     | 1152.51 | 0.07     | 1152.51 | 0.07     |  |
| 0.076678 | 1152.51 | 0.076678 | 1152.51 | 0.076678 | 1152.51 | 0.076678 | 1152.51 | 0.076678 |  |
| 0.08     | 1152.51 | 0.08     | 1152.51 | 0.08     | 1152.51 | 0.08     | 1152.51 | 0.08     |  |
| 0.086678 | 1152.51 | 0.086678 | 1152.51 | 0.086678 | 1152.51 | 0.086678 | 1152.51 | 0.086678 |  |
| 0.09     | 1152.51 | 0.09     | 1152.51 | 0.09     | 1152.51 | 0.09     | 1152.51 | 0.09     |  |
| 0.096678 | 1152.51 | 0.096678 | 1152.51 | 0.096678 | 1152.51 | 0.096678 | 1152.51 | 0.096678 |  |
| 0.1      | 1152.51 | 0.1      | 1152.51 | 0.1      | 1152.51 | 0.1      | 1152.51 | 0.1      |  |
| 0.106678 | 1152.51 | 0.106678 | 1152.51 | 0.106678 | 1152.51 | 0.106678 | 1152.51 | 0.106678 |  |
| 0.11     | 1152.51 | 0.11     | 1152.51 | 0.11     | 1152.51 | 0.11     | 1152.51 | 0.11     |  |
| 0.116678 | 1152.51 | 0.116678 | 1152.51 | 0.116678 | 1152.51 | 0.116678 | 1152.51 | 0.116678 |  |
| 0.12     | 1152.51 | 0.12     | 1152.51 | 0.12     | 1152.51 | 0.12     | 1152.51 | 0.12     |  |
| 0.126678 | 1152.51 | 0.126678 | 1152.51 | 0.126678 | 1152.51 | 0.126678 | 1152.51 | 0.126678 |  |
| 0.13     | 1152.51 | 0.13     | 1152.51 | 0.13     | 1152.51 | 0.13     | 1152.51 | 0.13     |  |
| 0.136678 | 1152.51 | 0.136678 | 1152.51 | 0.136678 | 1152.51 | 0.136678 | 1152.51 | 0.136678 |  |
| 0.14     | 1152.51 | 0.14     | 1152.51 | 0.14     | 1152.51 | 0.14     | 1152.51 | 0.14     |  |
| 0.146678 | 1152.51 | 0.146678 | 1152.51 | 0.146678 | 1152.51 | 0.146678 | 1152.51 | 0.146678 |  |
| 0.15     | 1152.51 | 0.15     | 1152.51 | 0.15     | 1152.51 | 0.15     | 1152.51 | 0.15     |  |
| 0.156678 | 1152.51 | 0.156678 | 1152.51 | 0.156678 | 1152.51 | 0.156678 | 1152.51 | 0.156678 |  |
| 0.16     | 1152.51 | 0.16     | 1152.51 | 0.16     | 1152.51 | 0.16     | 1152.51 | 0.16     |  |
| 0.166678 | 1152.51 | 0.166678 | 1152.51 | 0.166678 | 1152.51 | 0.166678 | 1152.51 | 0.166678 |  |
| 0.17     | 1152.51 | 0.17     | 1152.51 | 0.17     | 1152.51 | 0.17     | 1152.51 | 0.17     |  |
| 0.176678 | 1152.51 | 0.176678 | 1152.51 | 0.176678 | 1152.51 | 0.176678 | 1152.51 | 0.176678 |  |
| 0.18     | 1152.51 | 0.18     | 1152.51 | 0.18     | 1152.51 | 0.18     | 1152.51 | 0.18     |  |
| 0.186678 | 1152.51 | 0.186678 | 1152.51 | 0.186678 | 1152.51 | 0.186678 | 1152.51 | 0.186678 |  |
| 0.19     | 1152.51 | 0.19     | 1152.51 | 0.19     | 1152.51 | 0.19     | 1152.51 | 0.19     |  |
| 0.196678 | 1152.51 | 0.196678 | 1152.51 | 0.196678 | 1152.51 | 0.196678 | 1152.51 | 0.196678 |  |
| 0.2      | 1152.51 | 0.2      | 1152.51 | 0.2      | 1152.51 | 0.2      | 1152.51 | 0.2      |  |
| 0.206678 | 1152.51 | 0.206678 | 1152.51 | 0.206678 | 1152.51 | 0.206678 | 1152.51 | 0.206678 |  |
| 0.21     | 1152.51 | 0.21     | 1152.51 | 0.21     | 1152.51 | 0.21     | 1152.51 | 0.21     |  |

|          |         |          |         |          |         |          |         |          |
|----------|---------|----------|---------|----------|---------|----------|---------|----------|
| 0.216678 | 1152.51 | 0.216678 | 1152.51 | 0.216678 | 1152.51 | 0.216678 | 1152.51 | 0.216678 |
| 0.22     | 1152.51 | 0.22     | 1152.51 | 0.22     | 1152.51 | 0.22     | 1152.51 | 0.22     |
| 0.226678 | 1152.51 | 0.226678 | 1152.51 | 0.226678 | 1152.51 | 0.226678 | 1152.51 | 0.226678 |
| 0.23     | 1152.51 | 0.23     | 1152.51 | 0.23     | 1152.51 | 0.23     | 1152.51 | 0.23     |
| 0.236678 | 1152.51 | 0.236678 | 1152.51 | 0.236678 | 1152.51 | 0.236678 | 1152.51 | 0.236678 |
| 0.24     | 1152.51 | 0.24     | 1152.51 | 0.24     | 1152.51 | 0.24     | 1152.51 | 0.24     |
| 0.246678 | 1152.51 | 0.246678 | 1152.51 | 0.246678 | 1152.51 | 0.246678 | 1152.51 | 0.246678 |
| 0.25     | 1152.51 | 0.25     | 1152.51 | 0.25     | 1152.51 | 0.25     | 1152.51 | 0.25     |
| 0.256678 | 1152.51 | 0.256678 | 1152.51 | 0.256678 | 1152.51 | 0.256678 | 1152.51 | 0.256678 |
| 0.26     | 1152.51 | 0.26     | 1152.51 | 0.26     | 1152.51 | 0.26     | 1152.51 | 0.26     |
| 0.266678 | 1152.51 | 0.266678 | 1152.51 | 0.266678 | 1152.51 | 0.266678 | 1152.51 | 0.266678 |
| 0.27     | 1152.51 | 0.27     | 1152.51 | 0.27     | 1152.51 | 0.27     | 1152.51 | 0.27     |
| 0.276678 | 1152.51 | 0.276678 | 1152.51 | 0.276678 | 1152.51 | 0.276678 | 1152.51 | 0.276678 |
| 0.28     | 1152.51 | 0.28     | 1152.51 | 0.28     | 1152.51 | 0.28     | 1152.51 | 0.28     |
| 0.286678 | 1152.51 | 0.286678 | 1152.51 | 0.286678 | 1152.51 | 0.286678 | 1152.51 | 0.286678 |
| 0.29     | 1152.51 | 0.29     | 1152.51 | 0.29     | 1152.51 | 0.29     | 1152.51 | 0.29     |
| 0.296678 | 1152.51 | 0.296678 | 1152.51 | 0.296678 | 1152.51 | 0.296678 | 1152.51 | 0.296678 |
| 0.3      | 1152.51 | 0.3      | 1152.51 | 0.3      | 1152.51 | 0.3      | 1152.51 | 0.3      |
| 0.306678 | 1152.51 | 0.306678 | 1152.51 | 0.306678 | 1152.51 | 0.306678 | 1152.51 | 0.306678 |
| 0.31     | 1152.51 | 0.31     | 1152.51 | 0.31     | 1152.51 | 0.31     | 1152.51 | 0.31     |
| 0.316678 | 1152.51 | 0.316678 | 1152.51 | 0.316678 | 1152.51 | 0.316678 | 1152.51 | 0.316678 |
| 0.32     | 1152.51 | 0.32     | 1152.51 | 0.32     | 1152.51 | 0.32     | 1152.51 | 0.32     |
| 0.326678 | 1152.51 | 0.326678 | 1152.51 | 0.326678 | 1152.51 | 0.326678 | 1152.51 | 0.326678 |
| 0.33     | 1152.51 | 0.33     | 1152.51 | 0.33     | 1152.51 | 0.33     | 1152.51 | 0.33     |
| 0.336678 | 1152.51 | 0.336678 | 1152.51 | 0.336678 | 1152.51 | 0.336678 | 1152.51 | 0.336678 |
| 0.34     | 1152.51 | 0.34     | 1152.51 | 0.34     | 1152.51 | 0.34     | 1152.51 | 0.34     |
| 0.346678 | 1152.51 | 0.346678 | 1152.51 | 0.346678 | 1152.51 | 0.346678 | 1152.51 | 0.346678 |
| 0.35     | 1152.51 | 0.35     | 1152.51 | 0.35     | 1152.51 | 0.35     | 1152.51 | 0.35     |
| 0.356678 | 1152.51 | 0.356678 | 1152.51 | 0.356678 | 1152.51 | 0.356678 | 1152.51 | 0.356678 |
| 0.36     | 1152.51 | 0.36     | 1152.51 | 0.36     | 1152.51 | 0.36     | 1152.51 | 0.36     |
| 0.366678 | 1152.51 | 0.366678 | 1152.51 | 0.366678 | 1152.51 | 0.366678 | 1152.51 | 0.366678 |
| 0.37     | 1152.51 | 0.37     | 1152.51 | 0.37     | 1152.51 | 0.37     | 1152.51 | 0.37     |
| 0.376678 | 1152.51 | 0.376678 | 1152.51 | 0.376678 | 1152.51 | 0.376678 | 1152.51 | 0.376678 |
| 0.38     | 1152.51 | 0.38     | 1152.51 | 0.38     | 1152.51 | 0.38     | 1152.51 | 0.38     |
| 0.386678 | 1152.51 | 0.386678 | 1152.51 | 0.386678 | 1152.51 | 0.386678 | 1152.51 | 0.386678 |
| 0.39     | 1152.51 | 0.39     | 1152.51 | 0.39     | 1152.51 | 0.39     | 1152.51 | 0.39     |
| 0.396678 | 1152.51 | 0.396678 | 1152.51 | 0.396678 | 1152.51 | 0.396678 | 1152.51 | 0.396678 |
| 0.4      | 1152.51 | 0.4      | 1152.51 | 0.4      | 1152.51 | 0.4      | 1152.51 | 0.4      |
| 0.406678 | 1152.51 | 0.406678 | 1152.51 | 0.406678 | 1152.51 | 0.406678 | 1152.51 | 0.406678 |
| 0.41     | 1152.51 | 0.41     | 1152.51 | 0.41     | 1152.51 | 0.41     | 1152.51 | 0.41     |
| 0.416678 | 1152.51 | 0.416678 | 1152.51 | 0.416678 | 1152.51 | 0.416678 | 1152.51 | 0.416678 |
| 0.42     | 1152.51 | 0.42     | 1152.51 | 0.42     | 1152.51 | 0.42     | 1152.51 | 0.42     |
| 0.426678 | 1152.51 | 0.426678 | 1152.51 | 0.426678 | 1152.51 | 0.426678 | 1152.51 | 0.426678 |
| 0.43     | 1152.51 | 0.43     | 1152.51 | 0.43     | 1152.51 | 0.43     | 1152.51 | 0.43     |
| 0.436678 | 1152.51 | 0.436678 | 1152.51 | 0.436678 | 1152.51 | 0.436678 | 1152.51 | 0.436678 |
| 0.44     | 1152.51 | 0.44     | 1152.51 | 0.44     | 1152.51 | 0.44     | 1152.51 | 0.44     |
| 0.446678 | 1152.51 | 0.446678 | 1152.51 | 0.446678 | 1152.51 | 0.446678 | 1152.51 | 0.446678 |

|          |         |          |         |          |         |          |         |          |
|----------|---------|----------|---------|----------|---------|----------|---------|----------|
| 0.45     | 1152.51 | 0.45     | 1152.51 | 0.45     | 1152.51 | 0.45     | 1152.51 | 0.45     |
| 0.456678 | 1152.51 | 0.456678 | 1152.51 | 0.456678 | 1152.51 | 0.456678 | 1152.51 | 0.456678 |
| 0.46     | 1152.51 | 0.46     | 1152.51 | 0.46     | 1152.51 | 0.46     | 1152.51 | 0.46     |
| 0.466678 | 1152.51 | 0.466678 | 1152.51 | 0.466678 | 1152.51 | 0.466678 | 1152.51 | 0.466678 |
| 0.47     | 1152.51 | 0.47     | 1152.51 | 0.47     | 1152.51 | 0.47     | 1152.51 | 0.47     |
| 0.476678 | 1152.51 | 0.476678 | 1152.51 | 0.476678 | 1152.51 | 0.476678 | 1152.51 | 0.476678 |
| 0.48     | 1152.51 | 0.48     | 1152.51 | 0.48     | 1152.51 | 0.48     | 1152.51 | 0.48     |
| 0.486678 | 1152.51 | 0.486678 | 1152.51 | 0.486678 | 1152.51 | 0.486678 | 1152.51 | 0.486678 |
| 0.49     | 1152.51 | 0.49     | 1152.51 | 0.49     | 1152.51 | 0.49     | 1152.51 | 0.49     |
| 0.496678 | 1152.51 | 0.496678 | 1152.51 | 0.496678 | 1152.51 | 0.496678 | 1152.51 | 0.496678 |
| 0.5      | 1152.51 | 0.5      | 1152.51 | 0.5      | 1152.51 | 0.5      | 1152.51 | 0.5      |
| 0.506678 | 1152.51 | 0.506678 | 1152.51 | 0.506678 | 1152.51 | 0.506678 | 1152.51 | 0.506678 |
| 0.51     | 1152.51 | 0.51     | 1152.51 | 0.51     | 1152.51 | 0.51     | 1152.51 | 0.51     |
| 0.516678 | 1152.51 | 0.516678 | 1152.51 | 0.516678 | 1152.51 | 0.516678 | 1152.51 | 0.516678 |
| 0.52     | 1152.51 | 0.52     | 1152.51 | 0.52     | 1152.51 | 0.52     | 1152.51 | 0.52     |
| 0.526678 | 1152.51 | 0.526678 | 1152.51 | 0.526678 | 1152.51 | 0.526678 | 1152.51 | 0.526678 |
| 0.53     | 1152.51 | 0.53     | 1152.51 | 0.53     | 1152.51 | 0.53     | 1152.51 | 0.53     |
| 0.536678 | 1152.51 | 0.536678 | 1152.51 | 0.536678 | 1152.51 | 0.536678 | 1152.51 | 0.536678 |
| 0.54     | 1152.51 | 0.54     | 1152.51 | 0.54     | 1152.51 | 0.54     | 1152.51 | 0.54     |
| 0.546678 | 1152.51 | 0.546678 | 1152.51 | 0.546678 | 1152.51 | 0.546678 | 1152.51 | 0.546678 |
| 0.55     | 1152.51 | 0.55     | 1152.51 | 0.55     | 1152.51 | 0.55     | 1152.51 | 0.55     |
| 0.556678 | 1152.51 | 0.556678 | 1152.51 | 0.556678 | 1152.51 | 0.556678 | 1152.51 | 0.556678 |
| 0.56     | 1152.51 | 0.56     | 1152.51 | 0.56     | 1152.51 | 0.56     | 1152.51 | 0.56     |
| 0.566678 | 1152.51 | 0.566678 | 1152.51 | 0.566678 | 1152.51 | 0.566678 | 1152.51 | 0.566678 |
| 0.57     | 1152.51 | 0.57     | 1152.51 | 0.57     | 1152.51 | 0.57     | 1152.51 | 0.57     |
| 0.576678 | 1152.51 | 0.576678 | 1152.51 | 0.576678 | 1152.51 | 0.576678 | 1152.51 | 0.576678 |
| 0.58     | 1152.51 | 0.58     | 1152.51 | 0.58     | 1152.51 | 0.58     | 1152.51 | 0.58     |
| 0.586678 | 1152.51 | 0.586678 | 1152.51 | 0.586678 | 1152.51 | 0.586678 | 1152.51 | 0.586678 |
| 0.59     | 1152.51 | 0.59     | 1152.51 | 0.59     | 1152.51 | 0.59     | 1152.51 | 0.59     |
| 0.596678 | 1152.51 | 0.596678 | 1152.51 | 0.596678 | 1152.51 | 0.596678 | 1152.51 | 0.596678 |
| 0.6      | 1152.51 | 0.6      | 1152.51 | 0.6      | 1152.51 | 0.6      | 1152.51 | 0.6      |
| 0.606678 | 1152.51 | 0.606678 | 1152.51 | 0.606678 | 1152.51 | 0.606678 | 1152.51 | 0.606678 |
| 0.61     | 1152.51 | 0.61     | 1152.51 | 0.61     | 1152.51 | 0.61     | 1152.51 | 0.61     |
| 0.616678 | 1152.51 | 0.616678 | 1152.51 | 0.616678 | 1152.51 | 0.616678 | 1152.51 | 0.616678 |
| 0.62     | 1152.51 | 0.62     | 1152.51 | 0.62     | 1152.51 | 0.62     | 1152.51 | 0.62     |
| 0.626678 | 1152.51 | 0.626678 | 1152.51 | 0.626678 | 1152.51 | 0.626678 | 1152.51 | 0.626678 |
| 0.63     | 1152.51 | 0.63     | 1152.51 | 0.63     | 1152.51 | 0.63     | 1152.51 | 0.63     |
| 0.636678 | 1152.51 | 0.636678 | 1152.51 | 0.636678 | 1152.51 | 0.636678 | 1152.51 | 0.636678 |
| 0.64     | 1152.51 | 0.64     | 1152    |          |         |          |         |          |

|          |         |          |         |          |         |          |         |          |
|----------|---------|----------|---------|----------|---------|----------|---------|----------|
| 0.686678 | 1152.51 | 0.686678 | 1152.51 | 0.686678 | 1152.51 | 0.686678 | 1152.51 | 0.686678 |
| 0.69     | 1152.51 | 0.69     | 1152.51 | 0.69     | 1152.51 | 0.69     | 1152.51 | 0.69     |
| 0.696678 | 1152.51 | 0.696678 | 1152.51 | 0.696678 | 1152.51 | 0.696678 | 1152.51 | 0.696678 |
| 0.7      | 1152.51 | 0.7      | 1152.51 | 0.7      | 1152.51 | 0.7      | 1152.51 | 0.7      |
| 0.706678 | 1152.51 | 0.706678 | 1152.51 | 0.706678 | 1152.51 | 0.706678 | 1152.51 | 0.706678 |
| 0.71     | 1152.51 | 0.71     | 1152.51 | 0.71     | 1152.51 | 0.71     | 1152.51 | 0.71     |
| 0.716678 | 1152.51 | 0.716678 | 1152.51 | 0.716678 | 1152.51 | 0.716678 | 1152.51 | 0.716678 |
| 0.72     | 1152.51 | 0.72     | 1152.51 | 0.72     | 1152.51 | 0.72     | 1152.51 | 0.72     |
| 0.726678 | 1152.51 | 0.726678 | 1152.51 | 0.726678 | 1152.51 | 0.726678 | 1152.51 | 0.726678 |
| 0.73     | 1152.51 | 0.73     | 1152.51 | 0.73     | 1152.51 | 0.73     | 1152.51 | 0.73     |
| 0.736678 | 1152.51 | 0.736678 | 1152.51 | 0.736678 | 1152.51 | 0.736678 | 1152.51 | 0.736678 |
| 0.74     | 1152.51 | 0.74     | 1152.51 | 0.74     | 1152.51 | 0.74     | 1152.51 | 0.74     |
| 0.746678 | 1152.51 | 0.746678 | 1152.51 | 0.746678 | 1152.51 | 0.746678 | 1152.51 | 0.746678 |
| 0.75     | 1152.51 | 0.75     | 1152.51 | 0.75     | 1152.51 | 0.75     | 1152.51 | 0.75     |
| 0.756678 | 1152.51 | 0.756678 | 1152.51 | 0.756678 | 1152.51 | 0.756678 | 1152.51 | 0.756678 |
| 0.76     | 1152.51 | 0.76     | 1152.51 | 0.76     | 1152.51 | 0.76     | 1152.51 | 0.76     |
| 0.766678 | 1152.51 | 0.766678 | 1152.51 | 0.766678 | 1152.51 | 0.766678 | 1152.51 | 0.766678 |
| 0.77     | 1152.51 | 0.77     | 1152.51 | 0.77     | 1152.51 | 0.77     | 1152.51 | 0.77     |
| 0.776678 | 1152.51 | 0.776678 | 1152.51 | 0.776678 | 1152.51 | 0.776678 | 1152.51 | 0.776678 |
| 0.78     | 1152.51 | 0.78     | 1152.51 | 0.78     | 1152.51 | 0.78     | 1152.51 | 0.78     |
| 0.786678 | 1152.51 | 0.786678 | 1152.51 | 0.786678 | 1152.51 | 0.786678 | 1152.51 | 0.786678 |
| 0.79     | 1152.51 | 0.79     | 1152.51 | 0.79     | 1152.51 | 0.79     | 1152.51 | 0.79     |
| 0.796678 | 1152.51 | 0.796678 | 1152.51 | 0.796678 | 1152.51 | 0.796678 | 1152.51 | 0.796678 |
| 0.8      | 1152.51 | 0.8      | 1152.51 | 0.8      | 1152.51 | 0.8      | 1152.51 | 0.8      |
| 0.806678 | 1152.51 | 0.806678 | 1152.51 | 0.806678 | 1152.51 | 0.806678 | 1152.51 | 0.806678 |
| 0.81     | 1152.51 | 0.81     | 1152.51 | 0.81     | 1152.51 | 0.81     | 1152.51 | 0.81     |
| 0.816678 | 1152.51 | 0.816678 | 1152.51 | 0.816678 | 1152.51 | 0.816678 | 1152.51 | 0.816678 |
| 0.82     | 1152.51 | 0.82     | 1152.51 | 0.82     | 1152.51 | 0.82     | 1152.51 | 0.82     |
| 0.826678 | 1152.51 | 0.826678 | 1152.51 | 0.826678 | 1152.51 | 0.826678 | 1152.51 | 0.826678 |
| 0.83     | 1152.51 | 0.83     | 1152.51 | 0.83     | 1152.51 | 0.83     | 1152.51 | 0.83     |
| 0.836678 | 1152.51 | 0.836678 | 1152.51 | 0.836678 | 1152.51 | 0.836678 | 1152.51 | 0.836678 |
| 0.84     | 1152.51 | 0.84     | 1152.51 | 0.84     | 1152.51 | 0.84     | 1152.51 | 0.84     |
| 0.846678 | 1152.51 | 0.846678 | 1152.51 | 0.846678 | 1152.51 | 0.846678 | 1152.51 | 0.846678 |
| 0.85     | 1152.51 | 0.85     | 1152.51 | 0.85     | 1152.51 | 0.85     | 1152.51 | 0.85     |
| 0.856678 | 1152.51 | 0.856678 | 1152.51 | 0.856678 | 1152.51 | 0.856678 | 1152.51 | 0.856678 |
| 0.86     | 1152.51 | 0.86     | 1152.51 | 0.86     | 1152.51 | 0.86     | 1152.51 | 0.86     |
| 0.866678 | 1152.51 | 0.866678 | 1152.51 | 0.866678 | 1152.51 | 0.866678 | 1152.51 | 0.866678 |
| 0.87     | 1152.51 | 0.87     | 1152.51 | 0.87     | 1152.51 | 0.87     | 1152.51 | 0.87     |
| 0.876678 | 1152.51 | 0.876678 | 1152.51 | 0.876678 | 1152.51 | 0.876678 | 1152.51 | 0.876678 |
| 0.88     | 1152.51 | 0.88     | 1152.51 | 0.88     | 1152.51 | 0.88     | 1152.51 | 0.88     |
| 0.886678 | 1152.51 | 0.886678 | 1152.51 | 0.886678 | 1152.51 | 0.886678 | 1152.51 | 0.886678 |
| 0.89     | 1152.51 | 0.89     | 1152.51 | 0.89     | 1152.51 | 0.89     | 1152.51 | 0.89     |
| 0.896678 | 1152.51 | 0.896678 | 1152.51 | 0.896678 | 1152.51 | 0.896678 | 1152.51 | 0.896678 |
| 0.9      | 1152.51 | 0.9      | 1152.51 | 0.9      | 1152.51 | 0.9      | 1152.51 | 0.9      |
| 0.906678 | 1152.51 | 0.906678 | 1152.51 | 0.906678 | 1152.51 | 0.906678 | 1152.51 | 0.906678 |
| 0.91     | 1152.51 | 0.91     | 1152.51 | 0.91     | 1152.51 | 0.91     | 1152.51 | 0.91     |
| 0.916678 | 1152.51 | 0.916678 | 1152.51 | 0.916678 | 1152.51 | 0.916678 | 1152.51 | 0.916678 |

|          |         |          |         |          |         |          |         |          |
|----------|---------|----------|---------|----------|---------|----------|---------|----------|
| 0.92     | 1152.51 | 0.92     | 1152.51 | 0.92     | 1152.51 | 0.92     | 1152.51 | 0.92     |
| 0.926678 | 1152.51 | 0.926678 | 1152.51 | 0.926678 | 1152.51 | 0.926678 | 1152.51 | 0.926678 |
| 0.93     | 1152.51 | 0.93     | 1152.51 | 0.93     | 1152.51 | 0.93     | 1152.51 | 0.93     |
| 0.936678 | 1152.51 | 0.936678 | 1152.51 | 0.936678 | 1152.51 | 0.936678 | 1152.51 | 0.936678 |
| 0.94     | 1152.51 | 0.94     | 1152.51 | 0.94     | 1152.51 | 0.94     | 1152.51 | 0.94     |
| 0.946678 | 1152.51 | 0.946678 | 1152.51 | 0.946678 | 1152.51 | 0.946678 | 1152.51 | 0.946678 |
| 0.95     | 1152.51 | 0.95     | 1152.51 | 0.95     | 1152.51 | 0.95     | 1152.51 | 0.95     |
| 0.956678 | 1152.51 | 0.956678 | 1152.51 | 0.956678 | 1152.51 | 0.956678 | 1152.51 | 0.956678 |
| 0.96     | 1152.51 | 0.96     | 1152.51 | 0.96     | 1152.51 | 0.96     | 1152.51 | 0.96     |
| 0.966678 | 1152.51 | 0.966678 | 1152.51 | 0.966678 | 1152.51 | 0.966678 | 1152.51 | 0.966678 |
| 0.97     | 1152.51 | 0.97     | 1152.51 | 0.97     | 1152.51 | 0.97     | 1152.51 | 0.97     |
| 0.976678 | 1152.51 | 0.976678 | 1152.51 | 0.976678 | 1152.51 | 0.976678 | 1152.51 | 0.976678 |
| 0.98     | 1152.51 | 0.98     | 1152.51 | 0.98     | 1152.51 | 0.98     | 1152.51 | 0.98     |
| 0.986678 | 1152.51 | 0.986678 | 1152.51 | 0.986678 | 1152.51 | 0.986678 | 1152.51 | 0.986678 |
| 0.99     | 1152.51 | 0.99     | 1152.51 | 0.99     | 1152.51 | 0.99     | 1152.51 | 0.99     |
| 0.996678 | 1152.51 | 0.996678 | 1152.51 | 0.996678 | 1152.51 | 0.996678 | 1152.51 | 0.996678 |
| 1        | 1152.51 | 1        | 1152.51 | 1        | 1152.51 | 1        | 1152.51 | 1        |
| 1.006678 | 1152.51 | 1.006678 | 1152.51 | 1.006678 | 1152.51 | 1.006678 | 1152.51 | 1.006678 |
| 1.01     | 1152.51 | 1.01     | 1152.51 | 1.01     | 1152.51 | 1.01     | 1152.51 | 1.01     |
| 1.016678 | 1152.51 | 1.016678 | 1152.51 | 1.016678 | 1152.51 | 1.016678 | 1152.51 | 1.016678 |
| 1.02     | 1152.51 | 1.02     | 1152.51 | 1.02     | 1152.51 | 1.02     | 1152.51 | 1.02     |
| 1.026678 | 1152.51 | 1.026678 | 1152.51 | 1.026678 | 1152.51 | 1.026678 | 1152.51 | 1.026678 |
| 1.03     | 1152.51 | 1.03     | 1152.51 | 1.03     | 1152.51 | 1.03     | 1152.51 | 1.03     |
| 1.036678 | 1152.51 | 1.036678 | 1152.51 | 1.036678 | 1152.51 | 1.036678 | 1152.51 | 1.036678 |
| 1.04     | 1152.51 | 1.04     | 1152.51 | 1.04     | 1152.51 | 1.04     | 1152.51 | 1.04     |
| 1.046678 | 1152.51 | 1.046678 | 1152.51 | 1.046678 | 1152.51 | 1.046678 | 1152.51 | 1.046678 |
| 1.05     | 1152.51 | 1.05     | 1152.51 | 1.05     | 1152.51 | 1.05     | 1152.51 | 1.05     |
| 1.056678 | 1152.51 | 1.056678 | 1152.51 | 1.056678 | 1152.51 | 1.056678 | 1152.51 | 1.056678 |
| 1.06     | 1152.51 | 1.06     | 1152.51 | 1.06     | 1152.51 | 1.06     | 1152.51 | 1.06     |
| 1.066678 | 1152.51 | 1.066678 | 1152.51 | 1.066678 | 1152.51 | 1.066678 | 1152.51 | 1.066678 |
| 1.07     | 1152.51 | 1.07     | 1152.51 | 1.07     | 1152.51 | 1.07     | 1152.51 | 1.07     |
| 1.076678 | 1152.51 | 1.076678 | 1152.51 | 1.076678 | 1152.51 | 1.076678 | 1152.51 | 1.076678 |
| 1.08     | 1152.51 | 1.08     | 1152.51 | 1.08     | 1152.51 | 1.08     | 1152.51 | 1.08     |
| 1.086678 | 1152.51 | 1.086678 | 1152.51 | 1.086678 | 1152.51 | 1.086678 | 1152.51 | 1.086678 |
| 1.09     | 1152.51 | 1.09     | 1152.51 | 1.09     | 1152.51 | 1.09     | 1152.51 | 1.09     |
| 1.096678 | 1152.51 | 1.096678 | 1152.51 | 1.096678 | 1152.51 | 1.096678 | 1152.51 | 1.096678 |
| 1.1      | 1152.51 | 1.1      | 1152.51 | 1.1      | 1152.51 | 1.1      | 1152.51 | 1.1      |
| 1.106678 | 1152.51 | 1.106678 | 1152.51 | 1.106678 | 1152.51 | 1.106678 | 1152.51 | 1.106678 |
| 1.11     | 1152.51 | 1.11     | 1152.51 | 1.11     | 1152.51 | 1.11     | 1152.51 | 1.11     |
| 1.116678 | 1152.51 | 1.116678 | 1152.51 | 1.116678 | 1152.51 | 1.116678 | 1152.51 | 1.116678 |
| 1.12     | 1152.51 | 1.12     | 1152.51 | 1.12     | 1152.51 | 1.12     | 1152.51 | 1.12     |
| 1.126678 | 1152.51 | 1.126678 | 1152.51 | 1.126678 | 1152.51 | 1.126678 | 1152.51 | 1.126678 |
| 1.13     | 1152.51 | 1.13     | 1152.51 | 1.13     | 1152.51 | 1.13     | 1152.51 | 1.13     |
| 1.136678 | 1152.51 | 1.136678 | 1152.51 | 1.136678 | 1152.51 | 1.136678 | 1152.51 | 1.136678 |
| 1.14     | 1152.51 | 1.14     | 1152.51 | 1.14     | 1152.51 | 1.14     | 1152.51 | 1.14     |
| 1.146678 | 1152.51 | 1.146678 | 1152.51 | 1.146678 | 1152.51 | 1.146678 | 1152.51 | 1.146678 |
| 1.15     | 1152.51 | 1.15     | 1152.51 | 1.15     | 1152.51 | 1.15     | 1152.51 | 1.15     |

|          |         |          |         |          |         |          |         |          |
|----------|---------|----------|---------|----------|---------|----------|---------|----------|
| 1.156678 | 1152.51 | 1.156678 | 1152.51 | 1.156678 | 1152.51 | 1.156678 | 1152.51 | 1.156678 |
| 1.16     | 1152.51 | 1.16     | 1152.51 | 1.16     | 1152.51 | 1.16     | 1152.51 | 1.16     |
| 1.166678 | 1152.51 | 1.166678 | 1152.51 | 1.166678 | 1152.51 | 1.166678 | 1152.51 | 1.166678 |
| 1.17     | 1152.51 | 1.17     | 1152.51 | 1.17     | 1152.51 | 1.17     | 1152.51 | 1.17     |
| 1.176678 | 1152.51 | 1.176678 | 1152.51 | 1.176678 | 1152.51 | 1.176678 | 1152.51 | 1.176678 |
| 1.18     | 1152.51 | 1.18     | 1152.51 | 1.18     | 1152.51 | 1.18     | 1152.51 | 1.18     |
| 1.186678 | 1152.51 | 1.186678 | 1152.51 | 1.186678 | 1152.51 | 1.186678 | 1152.51 | 1.186678 |
| 1.19     | 1152.51 | 1.19     | 1152.51 | 1.19     | 1152.51 | 1.19     | 1152.51 | 1.19     |
| 1.196678 | 1152.51 | 1.196678 | 1152.51 | 1.196678 | 1152.51 | 1.196678 | 1152.51 | 1.196678 |
| 1.2      | 1152.51 | 1.2      | 1152.51 | 1.2      | 1152.51 | 1.2      | 1152.51 | 1.2      |
| 1.206678 | 1152.51 | 1.206678 | 1152.51 | 1.206678 | 1152.51 | 1.206678 | 1152.51 | 1.206678 |
| 1.21     | 1152.51 | 1.21     | 1152.51 | 1.21     | 1152.51 | 1.21     | 1152.51 | 1.21     |
| 1.216678 | 1152.51 | 1.216678 | 1152.51 | 1.216678 | 1152.51 | 1.216678 | 1152.51 | 1.216678 |
| 1.22     | 1152.51 | 1.22     | 1152.51 | 1.22     | 1152.51 | 1.22     | 1152.51 | 1.22     |
| 1.226678 | 1152.51 | 1.226678 | 1152.51 | 1.226678 | 1152.51 | 1.226678 | 1152.51 | 1.226678 |
| 1.23     | 1152.51 | 1.23     | 1152.51 | 1.23     | 1152.51 | 1.23     | 1152.51 | 1.23     |
| 1.236678 | 1152.51 | 1.236678 | 1152.51 | 1.236678 | 1152.51 | 1.236678 | 1152.51 | 1.236678 |
| 1.24     | 1152.51 | 1.24     | 1152.51 | 1.24     | 1152.51 | 1.24     | 1152.51 | 1.24     |
| 1.246678 | 1152.51 | 1.246678 | 1152.51 | 1.246678 | 1152.51 | 1.246678 | 1152.51 | 1.246678 |
| 1.25     | 1152.51 | 1.25     | 1152.51 | 1.25     | 1152.51 | 1.25     | 1152.51 | 1.25     |
| 1.256678 | 1152.51 | 1.256678 | 1152.51 | 1.256678 | 1152.51 | 1.256678 | 1152.51 | 1.256678 |
| 1.26     | 1152.51 | 1.26     | 1152.51 | 1.26     | 1152.51 | 1.26     | 1152.51 | 1.26     |
| 1.266678 | 1152.51 | 1.266678 | 1152.51 | 1.266678 | 1152.51 | 1.266678 | 1152.51 | 1.266678 |
| 1.27     | 1152.51 | 1.27     | 1152.51 | 1.27     | 1152.51 | 1.27     | 1152.51 | 1.27     |
| 1.276678 | 1152.51 | 1.276678 | 1152.51 | 1.276678 | 1152.51 | 1.276678 | 1152.51 | 1.276678 |
| 1.28     | 1152.51 | 1.28     | 1152.51 | 1.28     | 1152.51 | 1.28     | 1152.51 | 1.28     |
| 1.286678 | 1152.51 | 1.286678 | 1152.51 | 1.286678 | 1152.51 | 1.286678 | 1152.51 | 1.286678 |
| 1.29     | 1152.51 | 1.29     | 1152.51 | 1.29     | 1152.51 | 1.29     | 1152.51 | 1.29     |
| 1.296678 | 1152.51 | 1.296678 | 1152.51 | 1.296678 | 1152.51 | 1.296678 | 1152.51 | 1.296678 |
| 1.3      | 1152.51 | 1.3      | 1152.51 | 1.3      | 1152.51 | 1.3      | 1152.51 | 1.3      |
| 1.306678 | 1152.51 | 1.306678 | 1152.51 | 1.306678 | 1152.51 | 1.306678 | 1152.51 | 1.306678 |
| 1.31     | 1152.51 | 1.31     | 1152.51 | 1.31     | 1152.51 | 1.31     | 1152.51 | 1.31     |
| 1.316678 | 1152.51 | 1.316678 | 1152.51 | 1.316678 | 1152.51 | 1.316678 | 1152.51 | 1.316678 |
| 1.32     | 1152.51 | 1.32     | 1152.51 | 1.32     | 1152.51 | 1.32     | 1152.51 | 1.32     |
| 1.326678 | 1152.51 | 1.326678 | 1152.51 | 1.326678 | 1152.51 | 1.326678 | 1152.51 | 1.326678 |
| 1.33     | 1152.51 | 1.33     | 1152.51 | 1.33     | 1152.51 | 1.33     | 1152.51 | 1.33     |
| 1.336678 | 1152.51 | 1.336678 | 1152.51 | 1.336678 | 1152.51 | 1.336678 | 1152.51 | 1.336678 |
| 1.34     | 1152.51 | 1.34     | 1152.51 | 1.34     | 1152.51 | 1.34     | 1152.51 | 1.34     |
| 1.346678 | 1152.51 | 1.346678 | 1152.51 | 1.346678 | 1152.51 | 1.346678 | 1152.51 | 1.346678 |
| 1.35     | 1152.51 | 1.35     | 1152.51 | 1.35     | 1152.51 | 1.35     | 1152.51 | 1.35     |
| 1.356678 | 1152.51 | 1.356678 | 1152.51 | 1.356678 | 1152.51 | 1.356678 | 1152.51 | 1.356678 |
| 1.36     | 1152.51 | 1.36     | 1152.51 | 1.36     | 1152.51 | 1.36     | 1152.51 | 1.36     |
| 1.366678 | 1152.51 | 1.366678 | 1152.51 | 1.366678 | 1152.51 | 1.366678 | 1152.51 | 1.366678 |
| 1.37     | 1152.51 | 1.37     | 1152.51 | 1.37     | 1152.51 | 1.37     | 1152.51 | 1.37     |
| 1.376678 | 1152.51 | 1.376678 | 1152.51 | 1.376678 | 1152.51 | 1.376678 | 1152.51 | 1.376678 |
| 1.38     | 1152.51 | 1.38     | 1152.51 | 1.38     | 1152.51 | 1.38     | 1152.51 | 1.38     |
| 1.386678 | 1152.51 | 1.386678 | 1152.51 | 1.386678 | 1152.51 | 1.386678 | 1152.51 | 1.386678 |



|          |         |          |         |          |         |          |         |          |
|----------|---------|----------|---------|----------|---------|----------|---------|----------|
| 1.39     | 1152.51 | 1.39     | 1152.51 | 1.39     | 1152.51 | 1.39     | 1152.51 | 1.39     |
| 1.396678 | 1152.51 | 1.396678 | 1152.51 | 1.396678 | 1152.51 | 1.396678 | 1152.51 | 1.396678 |
| 1.4      | 1152.51 | 1.4      | 1152.51 | 1.4      | 1152.51 | 1.4      | 1152.51 | 1.4      |
| 1.406678 | 1152.51 | 1.406678 | 1152.51 | 1.406678 | 1152.51 | 1.406678 | 1152.51 | 1.406678 |
| 1.41     | 1152.51 | 1.41     | 1152.51 | 1.41     | 1152.51 | 1.41     | 1152.51 | 1.41     |
| 1.416678 | 1152.51 | 1.416678 | 1152.51 | 1.416678 | 1152.51 | 1.416678 | 1152.51 | 1.416678 |
| 1.42     | 1152.51 | 1.42     | 1152.51 | 1.42     | 1152.51 | 1.42     | 1152.51 | 1.42     |
| 1.426678 | 1152.51 | 1.426678 | 1152.51 | 1.426678 | 1152.51 | 1.426678 | 1152.51 | 1.426678 |
| 1.43     | 1152.51 | 1.43     | 1152.51 | 1.43     | 1152.51 | 1.43     | 1152.51 | 1.43     |
| 1.436678 | 1152.51 | 1.436678 | 1152.51 | 1.436678 | 1152.51 | 1.436678 | 1152.51 | 1.436678 |
| 1.44     | 1152.51 | 1.44     | 1152.51 | 1.44     | 1152.51 | 1.44     | 1152.51 | 1.44     |
| 1.446678 | 1152.51 | 1.446678 | 1152.51 | 1.446678 | 1152.51 | 1.446678 | 1152.51 | 1.446678 |
| 1.45     | 1152.51 | 1.45     | 1152.51 | 1.45     | 1152.51 | 1.45     | 1152.51 | 1.45     |
| 1.456678 | 1152.51 | 1.456678 | 1152.51 | 1.456678 | 1152.51 | 1.456678 | 1152.51 | 1.456678 |
| 1.46     | 1152.51 | 1.46     | 1152.51 | 1.46     | 1152.51 | 1.46     | 1152.51 | 1.46     |
| 1.466678 | 1152.51 | 1.466678 | 1152.51 | 1.466678 | 1152.51 | 1.466678 | 1152.51 | 1.466678 |
| 1.47     | 1152.51 | 1.47     | 1152.51 | 1.47     | 1152.51 | 1.47     | 1152.51 | 1.47     |
| 1.476678 | 1152.51 | 1.476678 | 1152.51 | 1.476678 | 1152.51 | 1.476678 | 1152.51 | 1.476678 |
| 1.48     | 1152.51 | 1.48     | 1152.51 | 1.48     | 1152.51 | 1.48     | 1152.51 | 1.48     |
| 1.486678 | 1152.51 | 1.486678 | 1152.51 | 1.486678 | 1152.51 | 1.486678 | 1152.51 | 1.486678 |
| 1.49     | 1152.51 | 1.49     | 1152.51 | 1.49     | 1152.51 | 1.49     | 1152.51 | 1.49     |
| 1.496678 | 1152.51 | 1.496678 | 1152.51 | 1.496678 | 1152.51 | 1.496678 | 1152.51 | 1.496678 |
| 1.5      | 1152.51 | 1.5      | 1152.51 | 1.5      | 1152.51 | 1.5      | 1152.51 | 1.5      |
| 1.506678 | 1152.51 | 1.506678 | 1152.51 | 1.506678 | 1152.51 | 1.506678 | 1152.51 | 1.506678 |
| 1.51     | 1152.51 | 1.51     | 1152.51 | 1.51     | 1152.51 | 1.51     | 1152.51 | 1.51     |
| 1.516678 | 1152.51 | 1.516678 | 1152.51 | 1.516678 | 1152.51 | 1.516678 | 1152.51 | 1.516678 |
| 1.52     | 1152.51 | 1.52     | 1152.51 | 1.52     | 1152.51 | 1.52     | 1152.51 | 1.52     |
| 1.526678 | 1152.51 | 1.526678 | 1152.51 | 1.526678 | 1152.51 | 1.526678 | 1152.51 | 1.526678 |
| 1.53     | 1152.51 | 1.53     | 1152.51 | 1.53     | 1152.51 | 1.53     | 1152.51 | 1.53     |
| 1.536678 | 1152.51 | 1.536678 | 1152.51 | 1.536678 | 1152.51 | 1.536678 | 1152.51 | 1.536678 |
| 1.54     | 1152.51 | 1.54     | 1152.51 | 1.54     | 1152.51 | 1.54     | 1152.51 | 1.54     |
| 1.546678 | 1152.51 | 1.546678 | 1152.51 | 1.546678 | 1152.51 | 1.546678 | 1152.51 | 1.546678 |
| 1.55     | 1152.51 | 1.55     | 1152.51 | 1.55     | 1152.51 | 1.55     | 1152.51 | 1.55     |
| 1.556678 | 1152.51 | 1.556678 | 1152.51 | 1.556678 | 1152.51 | 1.556678 | 1152.51 | 1.556678 |
| 1.56     | 1152.51 | 1.56     | 1152.51 | 1.56     | 1152.51 | 1.56     | 1152.51 | 1.56     |
| 1.566678 | 1152.51 | 1.566678 | 1152.51 | 1.566678 | 1152.51 | 1.566678 | 1152.51 | 1.566678 |
| 1.57     | 1152.51 | 1.57     | 1152.51 | 1.57     | 1152.51 | 1.57     | 1152.51 | 1.57     |
| 1.576678 | 1152.51 | 1.576678 | 1152.51 | 1.576678 | 1152.51 | 1.576678 | 1152.51 | 1.576678 |
| 1.58     | 1152.51 | 1.58     | 1152    |          |         |          |         |          |

|          |         |            |         |          |         |          |         |          |
|----------|---------|------------|---------|----------|---------|----------|---------|----------|
| 1.626678 | 1152.51 | 1.626678   | 1152.51 | 1.626678 | 1152.51 | 1.626678 | 1152.51 | 1.626678 |
| 1.63     | 1152.51 | 1.63       | 1152.51 | 1.63     | 1152.51 | 1.63     | 1152.51 | 1.63     |
| 1.636678 | 1152.51 | 1.636678   | 1152.51 | 1.636678 | 1152.51 | 1.636678 | 1152.51 | 1.636678 |
| 1.64     | 1152.51 | 1.64       | 1152.51 | 1.64     | 1152.51 | 1.64     | 1152.51 | 1.64     |
| 1.646678 | 1152.51 | 1.646678   | 1152.51 | 1.646678 | 1152.51 | 1.646678 | 1152.51 | 1.646678 |
| 1.65     | 1152.51 | 1.65       | 1152.51 | 1.65     | 1152.51 | 1.65     | 1152.51 | 1.65     |
| 1.656678 | 1152.51 | 1.656678   | 1152.51 | 1.656678 | 1152.51 | 1.656678 | 1152.51 | 1.656678 |
| 1.66     | 1152.51 | 1.66       | 1152.51 | 1.66     | 1152.51 | 1.66     | 1152.51 | 1.66     |
| 1.666678 | 1152.51 | 1.666678   | 1152.51 | 1.666678 | 1152.51 | 1.666678 | 1152.51 | 1.666678 |
| 1.67     | 1152.51 | 1.67       | 1152.51 | 1.67     | 1152.51 | 1.67     | 1152.51 | 1.67     |
| 1.676678 | 1152.51 | 1.676678   | 1152.51 | 1.676678 | 1152.51 | 1.676678 | 1152.51 | 1.676678 |
| 1.68     | 1152.51 | 1.68       | 1152.51 | 1.68     | 1152.51 | 1.68     | 1152.51 | 1.68     |
| 1.686678 | 1152.51 | 1.686678   | 1152.51 | 1.686678 | 1152.51 | 1.686678 | 1152.51 | 1.686678 |
| 1.69     | 1152.51 | 1.69       | 1152.51 | 1.69     | 1152.51 | 1.69     | 1152.51 | 1.69     |
| 1.696678 | 1152.51 | 1.696678   | 1152.51 | 1.696678 | 1152.51 | 1.696678 | 1152.51 | 1.696678 |
| 1.7      | 1152.51 | 1.7        | 1152.51 | 1.7      | 1152.51 | 1.7      | 1152.51 | 1.7      |
| 1.706678 | 1152.51 | 1.706678   | 1152.51 | 1.706678 | 1152.51 | 1.706678 | 1152.51 | 1.706678 |
| 1.71     | 1152.51 | 1.71       | 1152.51 | 1.71     | 1152.51 | 1.71     | 1152.51 | 1.71     |
| 1.716678 | 1152.51 | 1.716678   | 1152.51 | 1.716678 | 1152.51 | 1.716678 | 1152.51 | 1.716678 |
| 1.72     | 1152.51 | 1.72       | 1152.51 | 1.72     | 1152.51 | 1.72     | 1152.51 | 1.72     |
| 1.726678 | 1152.51 | 1.726678   | 1152.51 | 1.726678 | 1152.51 | 1.726678 | 1152.51 | 1.726678 |
| 1.73     | 1152.51 | 1.73       | 1152.51 | 1.73     | 1152.51 | 1.73     | 1152.51 | 1.73     |
| 1.736678 | 1152.51 | 1.736678   | 1152.51 | 1.736678 | 1152.51 | 1.736678 | 1152.51 | 1.736678 |
| 1.74     | 1152.51 | 1.74       | 1152.51 | 1.74     | 1152.51 | 1.74     | 1152.51 | 1.74     |
| 1.746678 | 1152.51 | 1.746678   | 1152.51 | 1.746678 | 1152.51 | 1.746678 | 1152.51 | 1.746678 |
| 1.75     | 1152.51 | 1.75       | 1152.51 | 1.75     | 1152.51 | 1.75     | 1152.51 | 1.75     |
| 1.756678 | 1152.51 | 1.756678   | 1152.51 | 1.756678 | 1152.51 | 1.756678 | 1152.51 | 1.756678 |
| 1.76     | 1152.51 | 1.76       | 1152.51 | 1.76     | 1152.51 | 1.76     | 1152.51 | 1.76     |
| 1.766678 | 1152.51 | 1.766678   | 1152.51 | 1.766678 | 1152.51 | 1.766678 | 1152.51 | 1.766678 |
| 1.77     | 1152.51 | 1.77       | 1152.51 | 1.77     | 1152.51 | 1.77     | 1152.51 | 1.77     |
| 1.776678 | 1152.51 | 1.776678   | 1152.51 | 1.776678 | 1152.51 | 1.776678 | 1152.51 | 1.776678 |
| 1.78     | 1152.51 | 1.78       | 1152.51 | 1.78     | 1152.51 | 1.78     | 1152.51 | 1.78     |
| 1.786678 | 1152.51 | 1.786678   | 1152.51 | 1.786678 | 1152.51 | 1.786678 | 1152.51 | 1.786678 |
| 1.79     | 1152.51 | 1.79       | 1152.51 | 1.79     | 1152.51 | 1.79     | 1152.51 | 1.79     |
| 1.796678 | 1152.51 | 1.796678   | 1152.51 | 1.796678 | 1152.51 | 1.796678 | 1152.51 | 1.796678 |
| 1.8      | 1152.51 | 1.8        | 1152.51 | 1.8      | 1152.51 | 1.8      | 1152.51 | 1.8      |
| 1.806678 | 1152.51 | 1.806678   | 1152.51 | 1.806678 | 1152.51 | 1.806678 | 1152.51 | 1.806678 |
| 1.81     | 1152.51 | 1.81       | 1152.51 | 1.81     | 1152.51 | 1.81     | 1152.51 | 1.81     |
| 1.816678 | 1152.51 | 1.816678</ |         |          |         |          |         |          |

|          |         |          |         |          |         |          |         |          |
|----------|---------|----------|---------|----------|---------|----------|---------|----------|
| 1.86     | 1152.51 | 1.86     | 1152.51 | 1.86     | 1152.51 | 1.86     | 1152.51 | 1.86     |
| 1.866678 | 1152.51 | 1.866678 | 1152.51 | 1.866678 | 1152.51 | 1.866678 | 1152.51 | 1.866678 |
| 1.87     | 1152.51 | 1.87     | 1152.51 | 1.87     | 1152.51 | 1.87     | 1152.51 | 1.87     |
| 1.876678 | 1152.51 | 1.876678 | 1152.51 | 1.876678 | 1152.51 | 1.876678 | 1152.51 | 1.876678 |
| 1.88     | 1152.51 | 1.88     | 1152.51 | 1.88     | 1152.51 | 1.88     | 1152.51 | 1.88     |
| 1.886678 | 1152.51 | 1.886678 | 1152.51 | 1.886678 | 1152.51 | 1.886678 | 1152.51 | 1.886678 |
| 1.89     | 1152.51 | 1.89     | 1152.51 | 1.89     | 1152.51 | 1.89     | 1152.51 | 1.89     |
| 1.896678 | 1152.51 | 1.896678 | 1152.51 | 1.896678 | 1152.51 | 1.896678 | 1152.51 | 1.896678 |
| 1.9      | 1152.51 | 1.9      | 1152.51 | 1.9      | 1152.51 | 1.9      | 1152.51 | 1.9      |
| 1.906678 | 1152.51 | 1.906678 | 1152.51 | 1.906678 | 1152.51 | 1.906678 | 1152.51 | 1.906678 |
| 1.91     | 1152.51 | 1.91     | 1152.51 | 1.91     | 1152.51 | 1.91     | 1152.51 | 1.91     |
| 1.916678 | 1152.51 | 1.916678 | 1152.51 | 1.916678 | 1152.51 | 1.916678 | 1152.51 | 1.916678 |
| 1.92     | 1152.51 | 1.92     | 1152.51 | 1.92     | 1152.51 | 1.92     | 1152.51 | 1.92     |
| 1.926678 | 1152.51 | 1.926678 | 1152.51 | 1.926678 | 1152.51 | 1.926678 | 1152.51 | 1.926678 |
| 1.93     | 1152.51 | 1.93     | 1152.51 | 1.93     | 1152.51 | 1.93     | 1152.51 | 1.93     |
| 1.936678 | 1152.51 | 1.936678 | 1152.51 | 1.936678 | 1152.51 | 1.936678 | 1152.51 | 1.936678 |
| 1.94     | 1152.51 | 1.94     | 1152.51 | 1.94     | 1152.51 | 1.94     | 1152.51 | 1.94     |
| 1.946678 | 1152.51 | 1.946678 | 1152.51 | 1.946678 | 1152.51 | 1.946678 | 1152.51 | 1.946678 |
| 1.95     | 1152.51 | 1.95     | 1152.51 | 1.95     | 1152.51 | 1.95     | 1152.51 | 1.95     |
| 1.956678 | 1152.51 | 1.956678 | 1152.51 | 1.956678 | 1152.51 | 1.956678 | 1152.51 | 1.956678 |
| 1.96     | 1152.51 | 1.96     | 1152.51 | 1.96     | 1152.51 | 1.96     | 1152.51 | 1.96     |
| 1.966678 | 1152.51 | 1.966678 | 1152.51 | 1.966678 | 1152.51 | 1.966678 | 1152.51 | 1.966678 |
| 1.97     | 1152.51 | 1.97     | 1152.51 | 1.97     | 1152.51 | 1.97     | 1152.51 | 1.97     |
| 1.976678 | 1152.51 | 1.976678 | 1152.51 | 1.976678 | 1152.51 | 1.976678 | 1152.51 | 1.976678 |
| 1.98     | 1152.51 | 1.98     | 1152.51 | 1.98     | 1152.51 | 1.98     | 1152.51 | 1.98     |
| 1.986678 | 1152.51 | 1.986678 | 1152.51 | 1.986678 | 1152.51 | 1.986678 | 1152.51 | 1.986678 |
| 1.99     | 1152.51 | 1.99     | 1152.51 | 1.99     | 1152.51 | 1.99     | 1152.51 | 1.99     |
| 1.996678 | 1152.51 | 1.996678 | 1152.51 | 1.996678 | 1152.51 | 1.996678 | 1152.51 | 1.996678 |
| 2        | 1152.51 | 2        | 1152.51 | 2        | 1152.51 | 2        | 1152.51 | 2        |
| 2.006678 | 1152.51 | 2.006678 | 1152.51 | 2.006678 | 1152.51 | 2.006678 | 1152.51 | 2.006678 |
| 2.01     | 1152.51 | 2.01     | 1152.51 | 2.01     | 1152.51 | 2.01     | 1152.51 | 2.01     |
| 2.016678 | 1152.51 | 2.016678 | 1152.51 | 2.016678 | 1152.51 | 2.016678 | 1152.51 | 2.016678 |
| 2.02     | 1152.51 | 2.02     | 1152.51 | 2.02     | 1152.51 | 2.02     | 1152.51 | 2.02     |
| 2.026678 | 1152.51 | 2.026678 | 1152.51 | 2.026678 | 1152.51 | 2.026678 | 1152.51 | 2.026678 |
| 2.03     | 1152.51 | 2.03     | 1152.51 | 2.03     | 1152.51 | 2.03     | 1152.51 | 2.03     |
| 2.036678 | 1152.51 | 2.036678 | 1152.51 | 2.036678 | 1152.51 | 2.036678 | 1152.51 | 2.036678 |
| 2.04     | 1152.51 | 2.04     | 1152.51 | 2.04     | 1152.51 | 2.04     | 1152.51 | 2.04     |
| 2.046678 | 1152.51 | 2.046678 | 1152.51 | 2.046678 | 1152.51 | 2.046678 | 1152.51 | 2.046678 |
| 2.05     | 1152.51 | 2.05     | 1152.51 | 2.05     | 1152.51 | 2.05     | 1152.51 | 2.05     |
| 2.056678 | 1152.51 | 2.056678 | 1152.51 | 2.056678 | 1152.51 | 2.056678 | 1152.51 | 2.056678 |
| 2.06     | 1152.51 | 2.06     | 1152.51 | 2.06     | 1152.51 | 2.06     | 1152.51 | 2.06     |
| 2.066678 | 1152.51 | 2.066678 | 1152.51 | 2.066678 | 1152.51 | 2.066678 | 1152.51 | 2.066678 |
| 2.07     | 1152.51 | 2.07     | 1152.51 | 2.07     | 1152.51 | 2.07     | 1152.51 | 2.07     |
| 2.076678 | 1152.51 | 2.076678 | 1152.51 | 2.076678 | 1152.51 | 2.076678 | 1152.51 | 2.076678 |
| 2.08     | 1152.51 | 2.08     | 1152.51 | 2.08     | 1152.51 | 2.08     | 1152.51 | 2.08     |
| 2.086678 | 1152.51 | 2.086678 | 1152.51 | 2.086678 | 1152.51 | 2.086678 | 1152.51 | 2.086678 |
| 2.09     | 1152.51 | 2.09     | 1152.51 | 2.09     | 1152.51 | 2.09     | 1152.51 | 2.09     |

|          |         |          |         |          |         |          |         |          |
|----------|---------|----------|---------|----------|---------|----------|---------|----------|
| 2.096678 | 1152.51 | 2.096678 | 1152.51 | 2.096678 | 1152.51 | 2.096678 | 1152.51 | 2.096678 |
| 2.1      | 1152.51 | 2.1      | 1152.51 | 2.1      | 1152.51 | 2.1      | 1152.51 | 2.1      |
| 2.106678 | 1152.51 | 2.106678 | 1152.51 | 2.106678 | 1152.51 | 2.106678 | 1152.51 | 2.106678 |
| 2.11     | 1152.51 | 2.11     | 1152.51 | 2.11     | 1152.51 | 2.11     | 1152.51 | 2.11     |
| 2.116678 | 1152.51 | 2.116678 | 1152.51 | 2.116678 | 1152.51 | 2.116678 | 1152.51 | 2.116678 |
| 2.12     | 1152.51 | 2.12     | 1152.51 | 2.12     | 1152.51 | 2.12     | 1152.51 | 2.12     |
| 2.126678 | 1152.51 | 2.126678 | 1152.51 | 2.126678 | 1152.51 | 2.126678 | 1152.51 | 2.126678 |
| 2.13     | 1152.51 | 2.13     | 1152.51 | 2.13     | 1152.51 | 2.13     | 1152.51 | 2.13     |
| 2.136678 | 1152.51 | 2.136678 | 1152.51 | 2.136678 | 1152.51 | 2.136678 | 1152.51 | 2.136678 |
| 2.14     | 1152.51 | 2.14     | 1152.51 | 2.14     | 1152.51 | 2.14     | 1152.51 | 2.14     |
| 2.146678 | 1152.51 | 2.146678 | 1152.51 | 2.146678 | 1152.51 | 2.146678 | 1152.51 | 2.146678 |
| 2.15     | 1152.51 | 2.15     | 1152.51 | 2.15     | 1152.51 | 2.15     | 1152.51 | 2.15     |
| 2.156678 | 1152.51 | 2.156678 | 1152.51 | 2.156678 | 1152.51 | 2.156678 | 1152.51 | 2.156678 |
| 2.16     | 1152.51 | 2.16     | 1152.51 | 2.16     | 1152.51 | 2.16     | 1152.51 | 2.16     |
| 2.166678 | 1152.51 | 2.166678 | 1152.51 | 2.166678 | 1152.51 | 2.166678 | 1152.51 | 2.166678 |
| 2.17     | 1152.51 | 2.17     | 1152.51 | 2.17     | 1152.51 | 2.17     | 1152.51 | 2.17     |
| 2.176678 | 1152.51 | 2.176678 | 1152.51 | 2.176678 | 1152.51 | 2.176678 | 1152.51 | 2.176678 |
| 2.18     | 1152.51 | 2.18     | 1152.51 | 2.18     | 1152.51 | 2.18     | 1152.51 | 2.18     |
| 2.186678 | 1152.51 | 2.186678 | 1152.51 | 2.186678 | 1152.51 | 2.186678 | 1152.51 | 2.186678 |
| 2.19     | 1152.51 | 2.19     | 1152.51 | 2.19     | 1152.51 | 2.19     | 1152.51 | 2.19     |
| 2.196678 | 1152.51 | 2.196678 | 1152.51 | 2.196678 | 1152.51 | 2.196678 | 1152.51 | 2.196678 |
| 2.2      | 1152.51 | 2.2      | 1152.51 | 2.2      | 1152.51 | 2.2      | 1152.51 | 2.2      |
| 2.206678 | 1152.51 | 2.206678 | 1152.51 | 2.206678 | 1152.51 | 2.206678 | 1152.51 | 2.206678 |
| 2.21     | 1152.51 | 2.21     | 1152.51 | 2.21     | 1152.51 | 2.21     | 1152.51 | 2.21     |
| 2.216678 | 1152.51 | 2.216678 | 1152.51 | 2.216678 | 1152.51 | 2.216678 | 1152.51 | 2.216678 |
| 2.22     | 1152.51 | 2.22     | 1152.51 | 2.22     | 1152.51 | 2.22     | 1152.51 | 2.22     |
| 2.226678 | 1152.51 | 2.226678 | 1152.51 | 2.226678 | 1152.51 | 2.226678 | 1152.51 | 2.226678 |
| 2.23     | 1152.51 | 2.23     | 1152.51 | 2.23     | 1152.51 | 2.23     | 1152.51 | 2.23     |
| 2.236678 | 1152.51 | 2.236678 | 1152.51 | 2.236678 | 1152.51 | 2.236678 | 1152.51 | 2.236678 |
| 2.24     | 1152.51 | 2.24     | 1152.51 | 2.24     | 1152.51 | 2.24     | 1152.51 | 2.24     |
| 2.246678 | 1152.51 | 2.246678 | 1152.51 | 2.246678 | 1152.51 | 2.246678 | 1152.51 | 2.246678 |
| 2.25     | 1152.51 | 2.25     | 1152.51 | 2.25     | 1152.51 | 2.25     | 1152.51 | 2.25     |
| 2.256678 | 1152.51 | 2.256678 | 1152.51 | 2.256678 | 1152.51 | 2.256678 | 1152.51 | 2.256678 |
| 2.26     | 1152.51 | 2.26     | 1152.51 | 2.26     | 1152.51 | 2.26     | 1152.51 | 2.26     |
| 2.266678 | 1152.51 | 2.266678 | 1152.51 | 2.266678 | 1152.51 | 2.266678 | 1152.51 | 2.266678 |
| 2.27     | 1152.51 | 2.27     | 1152.51 | 2.27     | 1152.51 | 2.27     | 1152.51 | 2.27     |
| 2.276678 | 1152.51 | 2.276678 | 1152.51 | 2.276678 | 1152.51 | 2.276678 | 1152.51 | 2.276678 |
| 2.28     | 1152.51 | 2.28     | 1152.51 | 2.28     | 1152.51 | 2.28     | 1152.51 | 2.28     |
| 2.286678 | 1152.51 | 2.286678 | 1152.51 | 2.286678 | 1152.51 | 2.286678 | 1152.51 | 2.286678 |
| 2.29     | 1152.51 | 2.29     | 1152.51 | 2.29     | 1152.51 | 2.29     | 1152.51 | 2.29     |
| 2.296678 | 1152.51 | 2.296678 | 1152.51 | 2.296678 | 1152.51 | 2.296678 | 1152.51 | 2.296678 |
| 2.3      | 1152.51 | 2.3      | 1152.51 | 2.3      | 1152.51 | 2.3      | 1152.51 | 2.3      |
| 2.306678 | 1152.51 | 2.306678 | 1152.51 | 2.306678 | 1152.51 | 2.306678 | 1152.51 | 2.306678 |
| 2.31     | 1152.51 | 2.31     | 1152.51 | 2.31     | 1152.51 | 2.31     | 1152.51 | 2.31     |
| 2.316678 | 1152.51 | 2.316678 | 1152.51 | 2.316678 | 1152.51 | 2.316678 | 1152.51 | 2.316678 |
| 2.32     | 1152.51 | 2.32     | 1152.51 | 2.32     | 1152.51 | 2.32     | 1152.51 | 2.32     |
| 2.326678 | 1152.51 | 2.326678 | 1152.51 | 2.326678 | 1152.51 | 2.326678 | 1152.51 | 2.326678 |

|          |         |          |         |          |         |          |         |          |
|----------|---------|----------|---------|----------|---------|----------|---------|----------|
| 2.33     | 1152.51 | 2.33     | 1152.51 | 2.33     | 1152.51 | 2.33     | 1152.51 | 2.33     |
| 2.336678 | 1152.51 | 2.336678 | 1152.51 | 2.336678 | 1152.51 | 2.336678 | 1152.51 | 2.336678 |
| 2.34     | 1152.51 | 2.34     | 1152.51 | 2.34     | 1152.51 | 2.34     | 1152.51 | 2.34     |
| 2.346678 | 1152.51 | 2.346678 | 1152.51 | 2.346678 | 1152.51 | 2.346678 | 1152.51 | 2.346678 |
| 2.35     | 1152.51 | 2.35     | 1152.51 | 2.35     | 1152.51 | 2.35     | 1152.51 | 2.35     |
| 2.356678 | 1152.51 | 2.356678 | 1152.51 | 2.356678 | 1152.51 | 2.356678 | 1152.51 | 2.356678 |
| 2.36     | 1152.51 | 2.36     | 1152.51 | 2.36     | 1152.51 | 2.36     | 1152.51 | 2.36     |
| 2.366678 | 1152.51 | 2.366678 | 1152.51 | 2.366678 | 1152.51 | 2.366678 | 1152.51 | 2.366678 |
| 2.37     | 1152.51 | 2.37     | 1152.51 | 2.37     | 1152.51 | 2.37     | 1152.51 | 2.37     |
| 2.376678 | 1152.51 | 2.376678 | 1152.51 | 2.376678 | 1152.51 | 2.376678 | 1152.51 | 2.376678 |
| 2.38     | 1152.51 | 2.38     | 1152.51 | 2.38     | 1152.51 | 2.38     | 1152.51 | 2.38     |
| 2.386678 | 1152.51 | 2.386678 | 1152.51 | 2.386678 | 1152.51 | 2.386678 | 1152.51 | 2.386678 |
| 2.39     | 1152.51 | 2.39     | 1152.51 | 2.39     | 1152.51 | 2.39     | 1152.51 | 2.39     |
| 2.396678 | 1152.51 | 2.396678 | 1152.51 | 2.396678 | 1152.51 | 2.396678 | 1152.51 | 2.396678 |
| 2.4      | 1152.51 | 2.4      | 1152.51 | 2.4      | 1152.51 | 2.4      | 1152.51 | 2.4      |
| 2.406678 | 1152.51 | 2.406678 | 1152.51 | 2.406678 | 1152.51 | 2.406678 | 1152.51 | 2.406678 |
| 2.41     | 1152.51 | 2.41     | 1152.51 | 2.41     | 1152.51 | 2.41     | 1152.51 | 2.41     |
| 2.416678 | 1152.51 | 2.416678 | 1152.51 | 2.416678 | 1152.51 | 2.416678 | 1152.51 | 2.416678 |
| 2.42     | 1152.51 | 2.42     | 1152.51 | 2.42     | 1152.51 | 2.42     | 1152.51 | 2.42     |
| 2.426678 | 1152.51 | 2.426678 | 1152.51 | 2.426678 | 1152.51 | 2.426678 | 1152.51 | 2.426678 |
| 2.43     | 1152.51 | 2.43     | 1152.51 | 2.43     | 1152.51 | 2.43     | 1152.51 | 2.43     |
| 2.436678 | 1152.51 | 2.436678 | 1152.51 | 2.436678 | 1152.51 | 2.436678 | 1152.51 | 2.436678 |
| 2.44     | 1152.51 | 2.44     | 1152.51 | 2.44     | 1152.51 | 2.44     | 1152.51 | 2.44     |
| 2.446678 | 1152.51 | 2.446678 | 1152.51 | 2.446678 | 1152.51 | 2.446678 | 1152.51 | 2.446678 |
| 2.45     | 1152.51 | 2.45     | 1152.51 | 2.45     | 1152.51 | 2.45     | 1152.51 | 2.45     |
| 2.456678 | 1152.51 | 2.456678 | 1152.51 | 2.456678 | 1152.51 | 2.456678 | 1152.51 | 2.456678 |
| 2.46     | 1152.51 | 2.46     | 1152.51 | 2.46     | 1152.51 | 2.46     | 1152.51 | 2.46     |
| 2.466678 | 1152.51 | 2.466678 | 1152.51 | 2.466678 | 1152.51 | 2.466678 | 1152.51 | 2.466678 |
| 2.47     | 1152.51 | 2.47     | 1152.51 | 2.47     | 1152.51 | 2.47     | 1152.51 | 2.47     |
| 2.476678 | 1152.51 | 2.476678 | 1152.51 | 2.476678 | 1152.51 | 2.476678 | 1152.51 | 2.476678 |
| 2.48     | 1152.51 | 2.48     | 1152.51 | 2.48     | 1152.51 | 2.48     | 1152.51 | 2.48     |
| 2.486678 | 1152.51 | 2.486678 | 1152.51 | 2.486678 | 1152.51 | 2.486678 | 1152.51 | 2.486678 |
| 2.49     | 1152.51 | 2.49     | 1152.51 | 2.49     | 1152.51 | 2.49     | 1152.51 | 2.49     |
| 2.496678 | 1152.51 | 2.496678 | 1152.51 | 2.496678 | 1152.51 | 2.496678 | 1152.51 | 2.496678 |
| 2.5      | 1152.51 | 2.5      | 1152.51 | 2.5      | 1152.51 | 2.5      | 1152.51 | 2.5      |
| 2.506678 | 1152.51 | 2.506678 | 1152.51 | 2.506678 | 1152.51 | 2.506678 | 1152.51 | 2.506678 |
| 2.51     | 1152.51 | 2.51     | 1152.51 | 2.51     | 1152.51 | 2.51     | 1152.51 | 2.51     |
| 2.516678 | 1152.51 | 2.516678 | 1152.51 | 2.516678 | 1152.51 | 2.516678 | 1152.51 | 2.516678 |
| 2.52     | 1152.51 | 2.52     | 1152    |          |         |          |         |          |

|          |         |            |         |          |         |          |         |          |
|----------|---------|------------|---------|----------|---------|----------|---------|----------|
| 2.566678 | 1152.51 | 2.566678   | 1152.51 | 2.566678 | 1152.51 | 2.566678 | 1152.51 | 2.566678 |
| 2.57     | 1152.51 | 2.57       | 1152.51 | 2.57     | 1152.51 | 2.57     | 1152.51 | 2.57     |
| 2.576678 | 1152.51 | 2.576678   | 1152.51 | 2.576678 | 1152.51 | 2.576678 | 1152.51 | 2.576678 |
| 2.58     | 1152.51 | 2.58       | 1152.51 | 2.58     | 1152.51 | 2.58     | 1152.51 | 2.58     |
| 2.586678 | 1152.51 | 2.586678   | 1152.51 | 2.586678 | 1152.51 | 2.586678 | 1152.51 | 2.586678 |
| 2.59     | 1152.51 | 2.59       | 1152.51 | 2.59     | 1152.51 | 2.59     | 1152.51 | 2.59     |
| 2.596678 | 1152.51 | 2.596678   | 1152.51 | 2.596678 | 1152.51 | 2.596678 | 1152.51 | 2.596678 |
| 2.6      | 1152.51 | 2.6        | 1152.51 | 2.6      | 1152.51 | 2.6      | 1152.51 | 2.6      |
| 2.606678 | 1152.51 | 2.606678   | 1152.51 | 2.606678 | 1152.51 | 2.606678 | 1152.51 | 2.606678 |
| 2.61     | 1152.51 | 2.61       | 1152.51 | 2.61     | 1152.51 | 2.61     | 1152.51 | 2.61     |
| 2.616678 | 1152.51 | 2.616678   | 1152.51 | 2.616678 | 1152.51 | 2.616678 | 1152.51 | 2.616678 |
| 2.62     | 1152.51 | 2.62       | 1152.51 | 2.62     | 1152.51 | 2.62     | 1152.51 | 2.62     |
| 2.626678 | 1152.51 | 2.626678   | 1152.51 | 2.626678 | 1152.51 | 2.626678 | 1152.51 | 2.626678 |
| 2.63     | 1152.51 | 2.63       | 1152.51 | 2.63     | 1152.51 | 2.63     | 1152.51 | 2.63     |
| 2.636678 | 1152.51 | 2.636678   | 1152.51 | 2.636678 | 1152.51 | 2.636678 | 1152.51 | 2.636678 |
| 2.64     | 1152.51 | 2.64       | 1152.51 | 2.64     | 1152.51 | 2.64     | 1152.51 | 2.64     |
| 2.646678 | 1152.51 | 2.646678   | 1152.51 | 2.646678 | 1152.51 | 2.646678 | 1152.51 | 2.646678 |
| 2.65     | 1152.51 | 2.65       | 1152.51 | 2.65     | 1152.51 | 2.65     | 1152.51 | 2.65     |
| 2.656678 | 1152.51 | 2.656678   | 1152.51 | 2.656678 | 1152.51 | 2.656678 | 1152.51 | 2.656678 |
| 2.66     | 1152.51 | 2.66       | 1152.51 | 2.66     | 1152.51 | 2.66     | 1152.51 | 2.66     |
| 2.666678 | 1152.51 | 2.666678   | 1152.51 | 2.666678 | 1152.51 | 2.666678 | 1152.51 | 2.666678 |
| 2.67     | 1152.51 | 2.67       | 1152.51 | 2.67     | 1152.51 | 2.67     | 1152.51 | 2.67     |
| 2.676678 | 1152.51 | 2.676678   | 1152.51 | 2.676678 | 1152.51 | 2.676678 | 1152.51 | 2.676678 |
| 2.68     | 1152.51 | 2.68       | 1152.51 | 2.68     | 1152.51 | 2.68     | 1152.51 | 2.68     |
| 2.686678 | 1152.51 | 2.686678   | 1152.51 | 2.686678 | 1152.51 | 2.686678 | 1152.51 | 2.686678 |
| 2.69     | 1152.51 | 2.69       | 1152.51 | 2.69     | 1152.51 | 2.69     | 1152.51 | 2.69     |
| 2.696678 | 1152.51 | 2.696678   | 1152.51 | 2.696678 | 1152.51 | 2.696678 | 1152.51 | 2.696678 |
| 2.7      | 1152.51 | 2.7        | 1152.51 | 2.7      | 1152.51 | 2.7      | 1152.51 | 2.7      |
| 2.706678 | 1152.51 | 2.706678   | 1152.51 | 2.706678 | 1152.51 | 2.706678 | 1152.51 | 2.706678 |
| 2.71     | 1152.51 | 2.71       | 1152.51 | 2.71     | 1152.51 | 2.71     | 1152.51 | 2.71     |
| 2.716678 | 1152.51 | 2.716678   | 1152.51 | 2.716678 | 1152.51 | 2.716678 | 1152.51 | 2.716678 |
| 2.72     | 1152.51 | 2.72       | 1152.51 | 2.72     | 1152.51 | 2.72     | 1152.51 | 2.72     |
| 2.726678 | 1152.51 | 2.726678   | 1152.51 | 2.726678 | 1152.51 | 2.726678 | 1152.51 | 2.726678 |
| 2.73     | 1152.51 | 2.73       | 1152.51 | 2.73     | 1152.51 | 2.73     | 1152.51 | 2.73     |
| 2.736678 | 1152.51 | 2.736678   | 1152.51 | 2.736678 | 1152.51 | 2.736678 | 1152.51 | 2.736678 |
| 2.74     | 1152.51 | 2.74       | 1152.51 | 2.74     | 1152.51 | 2.74     | 1152.51 | 2.74     |
| 2.746678 | 1152.51 | 2.746678   | 1152.51 | 2.746678 | 1152.51 | 2.746678 | 1152.51 | 2.746678 |
| 2.75     | 1152.51 | 2.75       | 1152.51 | 2.75     | 1152.51 | 2.75     | 1152.51 | 2.75     |
| 2.756678 | 1152.51 | 2.756678</ |         |          |         |          |         |          |

|          |         |          |         |          |         |          |         |          |
|----------|---------|----------|---------|----------|---------|----------|---------|----------|
| 2.8      | 1152.51 | 2.8      | 1152.51 | 2.8      | 1152.51 | 2.8      | 1152.51 | 2.8      |
| 2.806678 | 1152.51 | 2.806678 | 1152.51 | 2.806678 | 1152.51 | 2.806678 | 1152.51 | 2.806678 |
| 2.81     | 1152.51 | 2.81     | 1152.51 | 2.81     | 1152.51 | 2.81     | 1152.51 | 2.81     |
| 2.816678 | 1152.51 | 2.816678 | 1152.51 | 2.816678 | 1152.51 | 2.816678 | 1152.51 | 2.816678 |
| 2.82     | 1152.51 | 2.82     | 1152.51 | 2.82     | 1152.51 | 2.82     | 1152.51 | 2.82     |
| 2.826678 | 1152.51 | 2.826678 | 1152.51 | 2.826678 | 1152.51 | 2.826678 | 1152.51 | 2.826678 |
| 2.83     | 1152.51 | 2.83     | 1152.51 | 2.83     | 1152.51 | 2.83     | 1152.51 | 2.83     |
| 2.836678 | 1152.51 | 2.836678 | 1152.51 | 2.836678 | 1152.51 | 2.836678 | 1152.51 | 2.836678 |
| 2.84     | 1152.51 | 2.84     | 1152.51 | 2.84     | 1152.51 | 2.84     | 1152.51 | 2.84     |
| 2.846678 | 1152.51 | 2.846678 | 1152.51 | 2.846678 | 1152.51 | 2.846678 | 1152.51 | 2.846678 |
| 2.85     | 1152.51 | 2.85     | 1152.51 | 2.85     | 1152.51 | 2.85     | 1152.51 | 2.85     |
| 2.856678 | 1152.51 | 2.856678 | 1152.51 | 2.856678 | 1152.51 | 2.856678 | 1152.51 | 2.856678 |
| 2.86     | 1152.51 | 2.86     | 1152.51 | 2.86     | 1152.51 | 2.86     | 1152.51 | 2.86     |
| 2.866678 | 1152.51 | 2.866678 | 1152.51 | 2.866678 | 1152.51 | 2.866678 | 1152.51 | 2.866678 |
| 2.87     | 1152.51 | 2.87     | 1152.51 | 2.87     | 1152.51 | 2.87     | 1152.51 | 2.87     |
| 2.876678 | 1152.51 | 2.876678 | 1152.51 | 2.876678 | 1152.51 | 2.876678 | 1152.51 | 2.876678 |
| 2.88     | 1152.51 | 2.88     | 1152.51 | 2.88     | 1152.51 | 2.88     | 1152.51 | 2.88     |
| 2.886678 | 1152.51 | 2.886678 | 1152.51 | 2.886678 | 1152.51 | 2.886678 | 1152.51 | 2.886678 |
| 2.89     | 1152.51 | 2.89     | 1152.51 | 2.89     | 1152.51 | 2.89     | 1152.51 | 2.89     |
| 2.896678 | 1152.51 | 2.896678 | 1152.51 | 2.896678 | 1152.51 | 2.896678 | 1152.51 | 2.896678 |
| 2.9      | 1152.51 | 2.9      | 1152.51 | 2.9      | 1152.51 | 2.9      | 1152.51 | 2.9      |
| 2.906678 | 1152.51 | 2.906678 | 1152.51 | 2.906678 | 1152.51 | 2.906678 | 1152.51 | 2.906678 |
| 2.91     | 1152.51 | 2.91     | 1152.51 | 2.91     | 1152.51 | 2.91     | 1152.51 | 2.91     |
| 2.916678 | 1152.51 | 2.916678 | 1152.51 | 2.916678 | 1152.51 | 2.916678 | 1152.51 | 2.916678 |
| 2.92     | 1152.51 | 2.92     | 1152.51 | 2.92     | 1152.51 | 2.92     | 1152.51 | 2.92     |
| 2.926678 | 1152.51 | 2.926678 | 1152.51 | 2.926678 | 1152.51 | 2.926678 | 1152.51 | 2.926678 |
| 2.93     | 1152.51 | 2.93     | 1152.51 | 2.93     | 1152.51 | 2.93     | 1152.51 | 2.93     |
| 2.936678 | 1152.51 | 2.936678 | 1152.51 | 2.936678 | 1152.51 | 2.936678 | 1152.51 | 2.936678 |
| 2.94     | 1152.51 | 2.94     | 1152.51 | 2.94     | 1152.51 | 2.94     | 1152.51 | 2.94     |
| 2.946678 | 1152.51 | 2.946678 | 1152.51 | 2.946678 | 1152.51 | 2.946678 | 1152.51 | 2.946678 |
| 2.95     | 1152.51 | 2.95     | 1152.51 | 2.95     | 1152.51 | 2.95     | 1152.51 | 2.95     |
| 2.956678 | 1152.51 | 2.956678 | 1152.51 | 2.956678 | 1152.51 | 2.956678 | 1152.51 | 2.956678 |
| 2.96     | 1152.51 | 2.96     | 1152.51 | 2.96     | 1152.51 | 2.96     | 1152.51 | 2.96     |
| 2.966678 | 1152.51 | 2.966678 | 1152.51 | 2.966678 | 1152.51 | 2.966678 | 1152.51 | 2.966678 |
| 2.97     | 1152.51 | 2.97     | 1152.51 | 2.97     | 1152.51 | 2.97     | 1152.51 | 2.97     |
| 2.976678 | 1152.51 | 2.976678 | 1152.51 | 2.976678 | 1152.51 | 2.976678 | 1152.51 | 2.976678 |
| 2.98     | 1152.51 | 2.98     | 1152.51 | 2.98     | 1152.51 | 2.98     | 1152.51 | 2.98     |
| 2.986678 | 1152.51 | 2.986678 | 1152.51 | 2.986678 | 1152.51 | 2.986678 | 1152.51 | 2.986678 |
| 2.99     | 1152.51 | 2.99     | 1152    |          |         |          |         |          |

|          |         |            |         |          |         |          |         |          |
|----------|---------|------------|---------|----------|---------|----------|---------|----------|
| 3.036678 | 1152.51 | 3.036678   | 1152.51 | 3.036678 | 1152.51 | 3.036678 | 1152.51 | 3.036678 |
| 3.04     | 1152.51 | 3.04       | 1152.51 | 3.04     | 1152.51 | 3.04     | 1152.51 | 3.04     |
| 3.046678 | 1152.51 | 3.046678   | 1152.51 | 3.046678 | 1152.51 | 3.046678 | 1152.51 | 3.046678 |
| 3.05     | 1152.51 | 3.05       | 1152.51 | 3.05     | 1152.51 | 3.05     | 1152.51 | 3.05     |
| 3.056678 | 1152.51 | 3.056678   | 1152.51 | 3.056678 | 1152.51 | 3.056678 | 1152.51 | 3.056678 |
| 3.06     | 1152.51 | 3.06       | 1152.51 | 3.06     | 1152.51 | 3.06     | 1152.51 | 3.06     |
| 3.066678 | 1152.51 | 3.066678   | 1152.51 | 3.066678 | 1152.51 | 3.066678 | 1152.51 | 3.066678 |
| 3.07     | 1152.51 | 3.07       | 1152.51 | 3.07     | 1152.51 | 3.07     | 1152.51 | 3.07     |
| 3.076678 | 1152.51 | 3.076678   | 1152.51 | 3.076678 | 1152.51 | 3.076678 | 1152.51 | 3.076678 |
| 3.08     | 1152.51 | 3.08       | 1152.51 | 3.08     | 1152.51 | 3.08     | 1152.51 | 3.08     |
| 3.086678 | 1152.51 | 3.086678   | 1152.51 | 3.086678 | 1152.51 | 3.086678 | 1152.51 | 3.086678 |
| 3.09     | 1152.51 | 3.09       | 1152.51 | 3.09     | 1152.51 | 3.09     | 1152.51 | 3.09     |
| 3.096678 | 1152.51 | 3.096678   | 1152.51 | 3.096678 | 1152.51 | 3.096678 | 1152.51 | 3.096678 |
| 3.1      | 1152.51 | 3.1        | 1152.51 | 3.1      | 1152.51 | 3.1      | 1152.51 | 3.1      |
| 3.106678 | 1152.51 | 3.106678   | 1152.51 | 3.106678 | 1152.51 | 3.106678 | 1152.51 | 3.106678 |
| 3.11     | 1152.51 | 3.11       | 1152.51 | 3.11     | 1152.51 | 3.11     | 1152.51 | 3.11     |
| 3.116678 | 1152.51 | 3.116678   | 1152.51 | 3.116678 | 1152.51 | 3.116678 | 1152.51 | 3.116678 |
| 3.12     | 1152.51 | 3.12       | 1152.51 | 3.12     | 1152.51 | 3.12     | 1152.51 | 3.12     |
| 3.126678 | 1152.51 | 3.126678   | 1152.51 | 3.126678 | 1152.51 | 3.126678 | 1152.51 | 3.126678 |
| 3.13     | 1152.51 | 3.13       | 1152.51 | 3.13     | 1152.51 | 3.13     | 1152.51 | 3.13     |
| 3.136678 | 1152.51 | 3.136678   | 1152.51 | 3.136678 | 1152.51 | 3.136678 | 1152.51 | 3.136678 |
| 3.14     | 1152.51 | 3.14       | 1152.51 | 3.14     | 1152.51 | 3.14     | 1152.51 | 3.14     |
| 3.146678 | 1152.51 | 3.146678   | 1152.51 | 3.146678 | 1152.51 | 3.146678 | 1152.51 | 3.146678 |
| 3.15     | 1152.51 | 3.15       | 1152.51 | 3.15     | 1152.51 | 3.15     | 1152.51 | 3.15     |
| 3.156678 | 1152.51 | 3.156678   | 1152.51 | 3.156678 | 1152.51 | 3.156678 | 1152.51 | 3.156678 |
| 3.16     | 1152.51 | 3.16       | 1152.51 | 3.16     | 1152.51 | 3.16     | 1152.51 | 3.16     |
| 3.166678 | 1152.51 | 3.166678   | 1152.51 | 3.166678 | 1152.51 | 3.166678 | 1152.51 | 3.166678 |
| 3.17     | 1152.51 | 3.17       | 1152.51 | 3.17     | 1152.51 | 3.17     | 1152.51 | 3.17     |
| 3.176678 | 1152.51 | 3.176678   | 1152.51 | 3.176678 | 1152.51 | 3.176678 | 1152.51 | 3.176678 |
| 3.18     | 1152.51 | 3.18       | 1152.51 | 3.18     | 1152.51 | 3.18     | 1152.51 | 3.18     |
| 3.186678 | 1152.51 | 3.186678   | 1152.51 | 3.186678 | 1152.51 | 3.186678 | 1152.51 | 3.186678 |
| 3.19     | 1152.51 | 3.19       | 1152.51 | 3.19     | 1152.51 | 3.19     | 1152.51 | 3.19     |
| 3.196678 | 1152.51 | 3.196678   | 1152.51 | 3.196678 | 1152.51 | 3.196678 | 1152.51 | 3.196678 |
| 3.2      | 1152.51 | 3.2        | 1152.51 | 3.2      | 1152.51 | 3.2      | 1152.51 | 3.2      |
| 3.206678 | 1152.51 | 3.206678   | 1152.51 | 3.206678 | 1152.51 | 3.206678 | 1152.51 | 3.206678 |
| 3.21     | 1152.51 | 3.21       | 1152.51 | 3.21     | 1152.51 | 3.21     | 1152.51 | 3.21     |
| 3.216678 | 1152.51 | 3.216678   | 1152.51 | 3.216678 | 1152.51 | 3.216678 | 1152.51 | 3.216678 |
| 3.22     | 1152.51 | 3.22       | 1152.51 | 3.22     | 1152.51 | 3.22     | 1152.51 | 3.22     |
| 3.226678 | 1152.51 | 3.226678</ |         |          |         |          |         |          |



|          |         |          |         |          |         |          |         |          |
|----------|---------|----------|---------|----------|---------|----------|---------|----------|
| 3.27     | 1152.51 | 3.27     | 1152.51 | 3.27     | 1152.51 | 3.27     | 1152.51 | 3.27     |
| 3.276678 | 1152.51 | 3.276678 | 1152.51 | 3.276678 | 1152.51 | 3.276678 | 1152.51 | 3.276678 |
| 3.28     | 1152.51 | 3.28     | 1152.51 | 3.28     | 1152.51 | 3.28     | 1152.51 | 3.28     |
| 3.286678 | 1152.51 | 3.286678 | 1152.51 | 3.286678 | 1152.51 | 3.286678 | 1152.51 | 3.286678 |
| 3.29     | 1152.51 | 3.29     | 1152.51 | 3.29     | 1152.51 | 3.29     | 1152.51 | 3.29     |
| 3.296678 | 1152.51 | 3.296678 | 1152.51 | 3.296678 | 1152.51 | 3.296678 | 1152.51 | 3.296678 |
| 3.3      | 1152.51 | 3.3      | 1152.51 | 3.3      | 1152.51 | 3.3      | 1152.51 | 3.3      |
| 3.306678 | 1152.51 | 3.306678 | 1152.51 | 3.306678 | 1152.51 | 3.306678 | 1152.51 | 3.306678 |
| 3.31     | 1152.51 | 3.31     | 1152.51 | 3.31     | 1152.51 | 3.31     | 1152.51 | 3.31     |
| 3.316678 | 1152.51 | 3.316678 | 1152.51 | 3.316678 | 1152.51 | 3.316678 | 1152.51 | 3.316678 |
| 3.32     | 1152.51 | 3.32     | 1152.51 | 3.32     | 1152.51 | 3.32     | 1152.51 | 3.32     |
| 3.326678 | 1152.51 | 3.326678 | 1152.51 | 3.326678 | 1152.51 | 3.326678 | 1152.51 | 3.326678 |
| 3.33     | 1152.51 | 3.33     | 1152.51 | 3.33     | 1152.51 | 3.33     | 1152.51 | 3.33     |
| 3.336678 | 1152.51 | 3.336678 | 1152.51 | 3.336678 | 1152.51 | 3.336678 | 1152.51 | 3.336678 |
| 3.34     | 1152.51 | 3.34     | 1152.51 | 3.34     | 1152.51 | 3.34     | 1152.51 | 3.34     |
| 3.346678 | 1152.51 | 3.346678 | 1152.51 | 3.346678 | 1152.51 | 3.346678 | 1152.51 | 3.346678 |
| 3.35     | 1152.51 | 3.35     | 1152.51 | 3.35     | 1152.51 | 3.35     | 1152.51 | 3.35     |
| 3.356678 | 1152.51 | 3.356678 | 1152.51 | 3.356678 | 1152.51 | 3.356678 | 1152.51 | 3.356678 |
| 3.36     | 1152.51 | 3.36     | 1152.51 | 3.36     | 1152.51 | 3.36     | 1152.51 | 3.36     |
| 3.366678 | 1152.51 | 3.366678 | 1152.51 | 3.366678 | 1152.51 | 3.366678 | 1152.51 | 3.366678 |
| 3.37     | 1152.51 | 3.37     | 1152.51 | 3.37     | 1152.51 | 3.37     | 1152.51 | 3.37     |
| 3.376678 | 1152.51 | 3.376678 | 1152.51 | 3.376678 | 1152.51 | 3.376678 | 1152.51 | 3.376678 |
| 3.38     | 1152.51 | 3.38     | 1152.51 | 3.38     | 1152.51 | 3.38     | 1152.51 | 3.38     |
| 3.386678 | 1152.51 | 3.386678 | 1152.51 | 3.386678 | 1152.51 | 3.386678 | 1152.51 | 3.386678 |
| 3.39     | 1152.51 | 3.39     | 1152.51 | 3.39     | 1152.51 | 3.39     | 1152.51 | 3.39     |
| 3.396678 | 1152.51 | 3.396678 | 1152.51 | 3.396678 | 1152.51 | 3.396678 | 1152.51 | 3.396678 |
| 3.4      | 1152.51 | 3.4      | 1152.51 | 3.4      | 1152.51 | 3.4      | 1152.51 | 3.4      |
| 3.406678 | 1152.51 | 3.406678 | 1152.51 | 3.406678 | 1152.51 | 3.406678 | 1152.51 | 3.406678 |
| 3.41     | 1152.51 | 3.41     | 1152.51 | 3.41     | 1152.51 | 3.41     | 1152.51 | 3.41     |
| 3.416678 | 1152.51 | 3.416678 | 1152.51 | 3.416678 | 1152.51 | 3.416678 | 1152.51 | 3.416678 |
| 3.42     | 1152.51 | 3.42     | 1152.51 | 3.42     | 1152.51 | 3.42     | 1152.51 | 3.42     |
| 3.426678 | 1152.51 | 3.426678 | 1152.51 | 3.426678 | 1152.51 | 3.426678 | 1152.51 | 3.426678 |
| 3.43     | 1152.51 | 3.43     | 1152.51 | 3.43     | 1152.51 | 3.43     | 1152.51 | 3.43     |
| 3.436678 | 1152.51 | 3.436678 | 1152.51 | 3.436678 | 1152.51 | 3.436678 | 1152.51 | 3.436678 |
| 3.44     | 1152.51 | 3.44     | 1152.51 | 3.44     | 1152.51 | 3.44     | 1152.51 | 3.44     |
| 3.446678 | 1152.51 | 3.446678 | 1152.51 | 3.446678 | 1152.51 | 3.446678 | 1152.51 | 3.446678 |
| 3.45     | 1152.51 | 3.45     | 1152.51 | 3.45     | 1152.51 | 3.45     | 1152.51 | 3.45     |
| 3.456678 | 1152.51 | 3.456678 | 1152.51 | 3.456678 | 1152.51 | 3.456678 | 1152.51 | 3.456678 |
| 3.46     | 1152.51 | 3.46     | 1152    |          |         |          |         |          |

|          |         |          |         |          |         |          |         |          |
|----------|---------|----------|---------|----------|---------|----------|---------|----------|
| 3.506678 | 1152.51 | 3.506678 | 1152.51 | 3.506678 | 1152.51 | 3.506678 | 1152.51 | 3.506678 |
| 3.51     | 1152.51 | 3.51     | 1152.51 | 3.51     | 1152.51 | 3.51     | 1152.51 | 3.51     |
| 3.516678 | 1152.51 | 3.516678 | 1152.51 | 3.516678 | 1152.51 | 3.516678 | 1152.51 | 3.516678 |
| 3.52     | 1152.51 | 3.52     | 1152.51 | 3.52     | 1152.51 | 3.52     | 1152.51 | 3.52     |
| 3.526678 | 1152.51 | 3.526678 | 1152.51 | 3.526678 | 1152.51 | 3.526678 | 1152.51 | 3.526678 |
| 3.53     | 1152.51 | 3.53     | 1152.51 | 3.53     | 1152.51 | 3.53     | 1152.51 | 3.53     |
| 3.536678 | 1152.51 | 3.536678 | 1152.51 | 3.536678 | 1152.51 | 3.536678 | 1152.51 | 3.536678 |
| 3.54     | 1152.51 | 3.54     | 1152.51 | 3.54     | 1152.51 | 3.54     | 1152.51 | 3.54     |
| 3.546678 | 1152.51 | 3.546678 | 1152.51 | 3.546678 | 1152.51 | 3.546678 | 1152.51 | 3.546678 |
| 3.55     | 1152.51 | 3.55     | 1152.51 | 3.55     | 1152.51 | 3.55     | 1152.51 | 3.55     |
| 3.556678 | 1152.51 | 3.556678 | 1152.51 | 3.556678 | 1152.51 | 3.556678 | 1152.51 | 3.556678 |
| 3.56     | 1152.51 | 3.56     | 1152.51 | 3.56     | 1152.51 | 3.56     | 1152.51 | 3.56     |
| 3.566678 | 1152.51 | 3.566678 | 1152.51 | 3.566678 | 1152.51 | 3.566678 | 1152.51 | 3.566678 |
| 3.57     | 1152.51 | 3.57     | 1152.51 | 3.57     | 1152.51 | 3.57     | 1152.51 | 3.57     |
| 3.576678 | 1152.51 | 3.576678 | 1152.51 | 3.576678 | 1152.51 | 3.576678 | 1152.51 | 3.576678 |
| 3.58     | 1152.51 | 3.58     | 1152.51 | 3.58     | 1152.51 | 3.58     | 1152.51 | 3.58     |
| 3.586678 | 1152.51 | 3.586678 | 1152.51 | 3.586678 | 1152.51 | 3.586678 | 1152.51 | 3.586678 |
| 3.59     | 1152.51 | 3.59     | 1152.51 | 3.59     | 1152.51 | 3.59     | 1152.51 | 3.59     |
| 3.596678 | 1152.51 | 3.596678 | 1152.51 | 3.596678 | 1152.51 | 3.596678 | 1152.51 | 3.596678 |
| 3.6      | 1152.51 | 3.6      | 1152.51 | 3.6      | 1152.51 | 3.6      | 1152.51 | 3.6      |
| 3.606678 | 1152.51 | 3.606678 | 1152.51 | 3.606678 | 1152.51 | 3.606678 | 1152.51 | 3.606678 |
| 3.61     | 1152.51 | 3.61     | 1152.51 | 3.61     | 1152.51 | 3.61     | 1152.51 | 3.61     |
| 3.616678 | 1152.51 | 3.616678 | 1152.51 | 3.616678 | 1152.51 | 3.616678 | 1152.51 | 3.616678 |
| 3.62     | 1152.51 | 3.62     | 1152.51 | 3.62     | 1152.51 | 3.62     | 1152.51 | 3.62     |
| 3.626678 | 1152.51 | 3.626678 | 1152.51 | 3.626678 | 1152.51 | 3.626678 | 1152.51 | 3.626678 |
| 3.63     | 1152.51 | 3.63     | 1152.51 | 3.63     | 1152.51 | 3.63     | 1152.51 | 3.63     |
| 3.636678 | 1152.51 | 3.636678 | 1152.51 | 3.636678 | 1152.51 | 3.636678 | 1152.51 | 3.636678 |
| 3.64     | 1152.51 | 3.64     | 1152.51 | 3.64     | 1152.51 | 3.64     | 1152.51 | 3.64     |
| 3.646678 | 1152.51 | 3.646678 | 1152.51 | 3.646678 | 1152.51 | 3.646678 | 1152.51 | 3.646678 |
| 3.65     | 1152.51 | 3.65     | 1152.51 | 3.65     | 1152.51 | 3.65     | 1152.51 | 3.65     |
| 3.656678 | 1152.51 | 3.656678 | 1152.51 | 3.656678 | 1152.51 | 3.656678 | 1152.51 | 3.656678 |
| 3.66     | 1152.51 | 3.66     | 1152.51 | 3.66     | 1152.51 | 3.66     | 1152.51 | 3.66     |
| 3.666678 | 1152.51 | 3.666678 | 1152.51 | 3.666678 | 1152.51 | 3.666678 | 1152.51 | 3.666678 |
| 3.67     | 1152.51 | 3.67     | 1152.51 | 3.67     | 1152.51 | 3.67     | 1152.51 | 3.67     |
| 3.676678 | 1152.51 | 3.676678 | 1152.51 | 3.676678 | 1152.51 | 3.676678 | 1152.51 | 3.676678 |
| 3.68     | 1152.51 | 3.68     | 1152.51 | 3.68     | 1152.51 | 3.68     | 1152.51 | 3.68     |
| 3.686678 | 1152.51 | 3.686678 | 1152.51 | 3.686678 | 1152.51 | 3.686678 | 1152.51 | 3.686678 |
| 3.69     | 1152.51 | 3.69     | 1152.51 | 3.69     | 1152.51 | 3.69     | 1152.51 | 3.69     |
| 3.696678 | 1152.51 | 3.696678 | 1152.51 | 3.696678 | 1152.51 | 3.696678 | 1152.51 | 3.696678 |
| 3.7      | 1152.51 | 3.7      | 1152.51 | 3.7      | 1152.51 | 3.7      | 1152.51 | 3.7      |
| 3.706678 | 1152.51 | 3.706678 | 1152.51 | 3.706678 | 1152.51 | 3.706678 | 1152.51 | 3.706678 |
| 3.71     | 1152.51 | 3.71     | 1152.51 | 3.71     | 1152.51 | 3.71     | 1152.51 | 3.71     |
| 3.716678 | 1152.51 | 3.716678 | 1152.51 | 3.716678 | 1152.51 | 3.716678 | 1152.51 | 3.716678 |
| 3.72     | 1152.51 | 3.72     | 1152.51 | 3.72     | 1152.51 | 3.72     | 1152.51 | 3.72     |
| 3.726678 | 1152.51 | 3.726678 | 1152.51 | 3.726678 | 1152.51 | 3.726678 | 1152.51 | 3.726678 |
| 3.73     | 1152.51 | 3.73     | 1152.51 | 3.73     | 1152.51 | 3.73     | 1152.51 | 3.73     |
| 3.736678 | 1152.51 | 3.736678 | 1152.51 | 3.736678 | 1152.51 | 3.736678 | 1152.51 | 3.736678 |

|          |         |          |         |          |         |          |         |          |
|----------|---------|----------|---------|----------|---------|----------|---------|----------|
| 3.74     | 1152.51 | 3.74     | 1152.51 | 3.74     | 1152.51 | 3.74     | 1152.51 | 3.74     |
| 3.746678 | 1152.51 | 3.746678 | 1152.51 | 3.746678 | 1152.51 | 3.746678 | 1152.51 | 3.746678 |
| 3.75     | 1152.51 | 3.75     | 1152.51 | 3.75     | 1152.51 | 3.75     | 1152.51 | 3.75     |
| 3.756678 | 1152.51 | 3.756678 | 1152.51 | 3.756678 | 1152.51 | 3.756678 | 1152.51 | 3.756678 |
| 3.76     | 1152.51 | 3.76     | 1152.51 | 3.76     | 1152.51 | 3.76     | 1152.51 | 3.76     |
| 3.766678 | 1152.51 | 3.766678 | 1152.51 | 3.766678 | 1152.51 | 3.766678 | 1152.51 | 3.766678 |
| 3.77     | 1152.51 | 3.77     | 1152.51 | 3.77     | 1152.51 | 3.77     | 1152.51 | 3.77     |
| 3.776678 | 1152.51 | 3.776678 | 1152.51 | 3.776678 | 1152.51 | 3.776678 | 1152.51 | 3.776678 |
| 3.78     | 1152.51 | 3.78     | 1152.51 | 3.78     | 1152.51 | 3.78     | 1152.51 | 3.78     |
| 3.786678 | 1152.51 | 3.786678 | 1152.51 | 3.786678 | 1152.51 | 3.786678 | 1152.51 | 3.786678 |
| 3.79     | 1152.51 | 3.79     | 1152.51 | 3.79     | 1152.51 | 3.79     | 1152.51 | 3.79     |
| 3.796678 | 1152.51 | 3.796678 | 1152.51 | 3.796678 | 1152.51 | 3.796678 | 1152.51 | 3.796678 |
| 3.8      | 1152.51 | 3.8      | 1152.51 | 3.8      | 1152.51 | 3.8      | 1152.51 | 3.8      |
| 3.806678 | 1152.51 | 3.806678 | 1152.51 | 3.806678 | 1152.51 | 3.806678 | 1152.51 | 3.806678 |
| 3.81     | 1152.51 | 3.81     | 1152.51 | 3.81     | 1152.51 | 3.81     | 1152.51 | 3.81     |
| 3.816678 | 1152.51 | 3.816678 | 1152.51 | 3.816678 | 1152.51 | 3.816678 | 1152.51 | 3.816678 |
| 3.82     | 1152.51 | 3.82     | 1152.51 | 3.82     | 1152.51 | 3.82     | 1152.51 | 3.82     |
| 3.826678 | 1152.51 | 3.826678 | 1152.51 | 3.826678 | 1152.51 | 3.826678 | 1152.51 | 3.826678 |
| 3.83     | 1152.51 | 3.83     | 1152.51 | 3.83     | 1152.51 | 3.83     | 1152.51 | 3.83     |
| 3.836678 | 1152.51 | 3.836678 | 1152.51 | 3.836678 | 1152.51 | 3.836678 | 1152.51 | 3.836678 |
| 3.84     | 1152.51 | 3.84     | 1152.51 | 3.84     | 1152.51 | 3.84     | 1152.51 | 3.84     |
| 3.846678 | 1152.51 | 3.846678 | 1152.51 | 3.846678 | 1152.51 | 3.846678 | 1152.51 | 3.846678 |
| 3.85     | 1152.51 | 3.85     | 1152.51 | 3.85     | 1152.51 | 3.85     | 1152.51 | 3.85     |
| 3.856678 | 1152.51 | 3.856678 | 1152.51 | 3.856678 | 1152.51 | 3.856678 | 1152.51 | 3.856678 |
| 3.86     | 1152.51 | 3.86     | 1152.51 | 3.86     | 1152.51 | 3.86     | 1152.51 | 3.86     |
| 3.866678 | 1152.51 | 3.866678 | 1152.51 | 3.866678 | 1152.51 | 3.866678 | 1152.51 | 3.866678 |
| 3.87     | 1152.51 | 3.87     | 1152.51 | 3.87     | 1152.51 | 3.87     | 1152.51 | 3.87     |
| 3.876678 | 1152.51 | 3.876678 | 1152.51 | 3.876678 | 1152.51 | 3.876678 | 1152.51 | 3.876678 |
| 3.88     | 1152.51 | 3.88     | 1152.51 | 3.88     | 1152.51 | 3.88     | 1152.51 | 3.88     |
| 3.886678 | 1152.51 | 3.886678 | 1152.51 | 3.886678 | 1152.51 | 3.886678 | 1152.51 | 3.886678 |
| 3.89     | 1152.51 | 3.89     | 1152.51 | 3.89     | 1152.51 | 3.89     | 1152.51 | 3.89     |
| 3.896678 | 1152.51 | 3.896678 | 1152.51 | 3.896678 | 1152.51 | 3.896678 | 1152.51 | 3.896678 |
| 3.9      | 1152.51 | 3.9      | 1152.51 | 3.9      | 1152.51 | 3.9      | 1152.51 | 3.9      |
| 3.906678 | 1152.51 | 3.906678 | 1152.51 | 3.906678 | 1152.51 | 3.906678 | 1152.51 | 3.906678 |
| 3.91     | 1152.51 | 3.91     | 1152.51 | 3.91     | 1152.51 | 3.91     | 1152.51 | 3.91     |
| 3.916678 | 1152.51 | 3.916678 | 1152.51 | 3.916678 | 1152.51 | 3.916678 | 1152.51 | 3.916678 |
| 3.92     | 1152.51 | 3.92     | 1152.51 | 3.92     | 1152.51 | 3.92     | 1152.51 | 3.92     |
| 3.926678 | 1152.51 | 3.926678 | 1152.51 | 3.926678 | 1152.51 | 3.926678 | 1152.51 | 3.926678 |
| 3.93     | 1152.51 | 3.93     | 1152    |          |         |          |         |          |

|          |         |          |         |          |         |          |         |          |
|----------|---------|----------|---------|----------|---------|----------|---------|----------|
| 3.976678 | 1152.51 | 3.976678 | 1152.51 | 3.976678 | 1152.51 | 3.976678 | 1152.51 | 3.976678 |
| 3.98     | 1152.51 | 3.98     | 1152.51 | 3.98     | 1152.51 | 3.98     | 1152.51 | 3.98     |
| 3.986678 | 1152.51 | 3.986678 | 1152.51 | 3.986678 | 1152.51 | 3.986678 | 1152.51 | 3.986678 |
| 3.99     | 1152.51 | 3.99     | 1152.51 | 3.99     | 1152.51 | 3.99     | 1152.51 | 3.99     |
| 3.996678 | 1152.51 | 3.996678 | 1152.51 | 3.996678 | 1152.51 | 3.996678 | 1152.51 | 3.996678 |
| 4        | 1152.51 | 4        | 1152.51 | 4        | 1152.51 | 4        | 1152.51 | 4        |
| 4.006678 | 1152.51 | 4.006678 | 1152.51 | 4.006678 | 1152.51 | 4.006678 | 1152.51 | 4.006678 |
| 4.01     | 1152.51 | 4.01     | 1152.51 | 4.01     | 1152.51 | 4.01     | 1152.51 | 4.01     |
| 4.016678 | 1152.51 | 4.016678 | 1152.51 | 4.016678 | 1152.51 | 4.016678 | 1152.51 | 4.016678 |
| 4.02     | 1152.51 | 4.02     | 1152.51 | 4.02     | 1152.51 | 4.02     | 1152.51 | 4.02     |
| 4.026678 | 1152.51 | 4.026678 | 1152.51 | 4.026678 | 1152.51 | 4.026678 | 1152.51 | 4.026678 |
| 4.03     | 1152.51 | 4.03     | 1152.51 | 4.03     | 1152.51 | 4.03     | 1152.51 | 4.03     |
| 4.036678 | 1152.51 | 4.036678 | 1152.51 | 4.036678 | 1152.51 | 4.036678 | 1152.51 | 4.036678 |
| 4.04     | 1152.51 | 4.04     | 1152.51 | 4.04     | 1152.51 | 4.04     | 1152.51 | 4.04     |
| 4.046678 | 1152.51 | 4.046678 | 1152.51 | 4.046678 | 1152.51 | 4.046678 | 1152.51 | 4.046678 |
| 4.05     | 1152.51 | 4.05     | 1152.51 | 4.05     | 1152.51 | 4.05     | 1152.51 | 4.05     |
| 4.056678 | 1152.51 | 4.056678 | 1152.51 | 4.056678 | 1152.51 | 4.056678 | 1152.51 | 4.056678 |
| 4.06     | 1152.51 | 4.06     | 1152.51 | 4.06     | 1152.51 | 4.06     | 1152.51 | 4.06     |
| 4.066678 | 1152.51 | 4.066678 | 1152.51 | 4.066678 | 1152.51 | 4.066678 | 1152.51 | 4.066678 |
| 4.07     | 1152.51 | 4.07     | 1152.51 | 4.07     | 1152.51 | 4.07     | 1152.51 | 4.07     |
| 4.076678 | 1152.51 | 4.076678 | 1152.51 | 4.076678 | 1152.51 | 4.076678 | 1152.51 | 4.076678 |
| 4.08     | 1152.51 | 4.08     | 1152.51 | 4.08     | 1152.51 | 4.08     | 1152.51 | 4.08     |
| 4.086678 | 1152.51 | 4.086678 | 1152.51 | 4.086678 | 1152.51 | 4.086678 | 1152.51 | 4.086678 |
| 4.09     | 1152.51 | 4.09     | 1152.51 | 4.09     | 1152.51 | 4.09     | 1152.51 | 4.09     |
| 4.096678 | 1152.51 | 4.096678 | 1152.51 | 4.096678 | 1152.51 | 4.096678 | 1152.51 | 4.096678 |
| 4.1      | 1152.51 | 4.1      | 1152.51 | 4.1      | 1152.51 | 4.1      | 1152.51 | 4.1      |
| 4.106678 | 1152.51 | 4.106678 | 1152.51 | 4.106678 | 1152.51 | 4.106678 | 1152.51 | 4.106678 |
| 4.11     | 1152.51 | 4.11     | 1152.51 | 4.11     | 1152.51 | 4.11     | 1152.51 | 4.11     |
| 4.116678 | 1152.51 | 4.116678 | 1152.51 | 4.116678 | 1152.51 | 4.116678 | 1152.51 | 4.116678 |
| 4.12     | 1152.51 | 4.12     | 1152.51 | 4.12     | 1152.51 | 4.12     | 1152.51 | 4.12     |
| 4.126678 | 1152.51 | 4.126678 | 1152.51 | 4.126678 | 1152.51 | 4.126678 | 1152.51 | 4.126678 |
| 4.13     | 1152.51 | 4.13     | 1152.51 | 4.13     | 1152.51 | 4.13     | 1152.51 | 4.13     |
| 4.136678 | 1152.51 | 4.136678 | 1152.51 | 4.136678 | 1152.51 | 4.136678 | 1152.51 | 4.136678 |
| 4.14     | 1152.51 | 4.14     | 1152.51 | 4.14     | 1152.51 | 4.14     | 1152.51 | 4.14     |
| 4.146678 | 1152.51 | 4.146678 | 1152.51 | 4.146678 | 1152.51 | 4.146678 | 1152.51 | 4.146678 |
| 4.15     | 1152.51 | 4.15     | 1152.51 | 4.15     | 1152.51 | 4.15     | 1152.51 | 4.15     |
| 4.156678 | 1152.51 | 4.156678 | 1152.51 | 4.156678 | 1152.51 | 4.156678 | 1152.51 | 4.156678 |
| 4.16     | 1152.51 | 4.16     | 1152.51 | 4.16     | 1152.51 | 4.16     | 1152.51 | 4.16     |
| 4.166678 | 1152.51 | 4.166678 | 1152.5  |          |         |          |         |          |

|          |         |          |         |          |         |          |         |          |
|----------|---------|----------|---------|----------|---------|----------|---------|----------|
| 4.21     | 1152.51 | 4.21     | 1152.51 | 4.21     | 1152.51 | 4.21     | 1152.51 | 4.21     |
| 4.216678 | 1152.51 | 4.216678 | 1152.51 | 4.216678 | 1152.51 | 4.216678 | 1152.51 | 4.216678 |
| 4.22     | 1152.51 | 4.22     | 1152.51 | 4.22     | 1152.51 | 4.22     | 1152.51 | 4.22     |
| 4.226678 | 1152.51 | 4.226678 | 1152.51 | 4.226678 | 1152.51 | 4.226678 | 1152.51 | 4.226678 |
| 4.23     | 1152.51 | 4.23     | 1152.51 | 4.23     | 1152.51 | 4.23     | 1152.51 | 4.23     |
| 4.236678 | 1152.51 | 4.236678 | 1152.51 | 4.236678 | 1152.51 | 4.236678 | 1152.51 | 4.236678 |
| 4.24     | 1152.51 | 4.24     | 1152.51 | 4.24     | 1152.51 | 4.24     | 1152.51 | 4.24     |
| 4.246678 | 1152.51 | 4.246678 | 1152.51 | 4.246678 | 1152.51 | 4.246678 | 1152.51 | 4.246678 |
| 4.25     | 1152.51 | 4.25     | 1152.51 | 4.25     | 1152.51 | 4.25     | 1152.51 | 4.25     |
| 4.256678 | 1152.51 | 4.256678 | 1152.51 | 4.256678 | 1152.51 | 4.256678 | 1152.51 | 4.256678 |
| 4.26     | 1152.51 | 4.26     | 1152.51 | 4.26     | 1152.51 | 4.26     | 1152.51 | 4.26     |
| 4.266678 | 1152.51 | 4.266678 | 1152.51 | 4.266678 | 1152.51 | 4.266678 | 1152.51 | 4.266678 |
| 4.27     | 1152.51 | 4.27     | 1152.51 | 4.27     | 1152.51 | 4.27     | 1152.51 | 4.27     |
| 4.276678 | 1152.51 | 4.276678 | 1152.51 | 4.276678 | 1152.51 | 4.276678 | 1152.51 | 4.276678 |
| 4.28     | 1152.51 | 4.28     | 1152.51 | 4.28     | 1152.51 | 4.28     | 1152.51 | 4.28     |
| 4.286678 | 1152.51 | 4.286678 | 1152.51 | 4.286678 | 1152.51 | 4.286678 | 1152.51 | 4.286678 |
| 4.29     | 1152.51 | 4.29     | 1152.51 | 4.29     | 1152.51 | 4.29     | 1152.51 | 4.29     |
| 4.296678 | 1152.51 | 4.296678 | 1152.51 | 4.296678 | 1152.51 | 4.296678 | 1152.51 | 4.296678 |
| 4.3      | 1152.51 | 4.3      | 1152.51 | 4.3      | 1152.51 | 4.3      | 1152.51 | 4.3      |
| 4.306678 | 1152.51 | 4.306678 | 1152.51 | 4.306678 | 1152.51 | 4.306678 | 1152.51 | 4.306678 |
| 4.31     | 1152.51 | 4.31     | 1152.51 | 4.31     | 1152.51 | 4.31     | 1152.51 | 4.31     |
| 4.316678 | 1152.51 | 4.316678 | 1152.51 | 4.316678 | 1152.51 | 4.316678 | 1152.51 | 4.316678 |
| 4.32     | 1152.51 | 4.32     | 1152.51 | 4.32     | 1152.51 | 4.32     | 1152.51 | 4.32     |
| 4.326678 | 1152.51 | 4.326678 | 1152.51 | 4.326678 | 1152.51 | 4.326678 | 1152.51 | 4.326678 |
| 4.33     | 1152.51 | 4.33     | 1152.51 | 4.33     | 1152.51 | 4.33     | 1152.51 | 4.33     |
| 4.336678 | 1152.51 | 4.336678 | 1152.51 | 4.336678 | 1152.51 | 4.336678 | 1152.51 | 4.336678 |
| 4.34     | 1152.51 | 4.34     | 1152.51 | 4.34     | 1152.51 | 4.34     | 1152.51 | 4.34     |
| 4.346678 | 1152.51 | 4.346678 | 1152.51 | 4.346678 | 1152.51 | 4.346678 | 1152.51 | 4.346678 |
| 4.35     | 1152.51 | 4.35     | 1152.51 | 4.35     | 1152.51 | 4.35     | 1152.51 | 4.35     |
| 4.356678 | 1152.51 | 4.356678 | 1152.51 | 4.356678 | 1152.51 | 4.356678 | 1152.51 | 4.356678 |
| 4.36     | 1152.51 | 4.36     | 1152.51 | 4.36     | 1152.51 | 4.36     | 1152.51 | 4.36     |
| 4.366678 | 1152.51 | 4.366678 | 1152.51 | 4.366678 | 1152.51 | 4.366678 | 1152.51 | 4.366678 |
| 4.37     | 1152.51 | 4.37     | 1152.51 | 4.37     | 1152.51 | 4.37     | 1152.51 | 4.37     |
| 4.376678 | 1152.51 | 4.376678 | 1152.51 | 4.376678 | 1152.51 | 4.376678 | 1152.51 | 4.376678 |
| 4.38     | 1152.51 | 4.38     | 1152.51 | 4.38     | 1152.51 | 4.38     | 1152.51 | 4.38     |
| 4.386678 | 1152.51 | 4.386678 | 1152.51 | 4.386678 | 1152.51 | 4.386678 | 1152.51 | 4.386678 |
| 4.39     | 1152.51 | 4.39     | 1152.51 | 4.39     | 1152.51 | 4.39     | 1152.51 | 4.39     |
| 4.396678 | 1152.51 | 4.396678 | 1152.51 | 4.396678 | 1152.51 | 4.396678 | 1152.51 | 4.396678 |
| 4.4      | 1152.51 | 4.4      | 1152.51 | 4.4      | 1152.51 | 4.4      | 1152.51 | 4.4      |
| 4.406678 | 1152.51 | 4.406678 | 1152.51 | 4.406678 | 1152.51 | 4.406678 | 1152.51 | 4.406678 |
| 4.41     | 1152.51 | 4.41     | 1152.51 | 4.41     | 1152.51 | 4.41     | 1152.51 | 4.41     |
| 4.416678 | 1152.51 | 4.416678 | 1152.51 | 4.416678 | 1152.51 | 4.416678 | 1152.51 | 4.416678 |
| 4.42     | 1152.51 | 4.42     | 1152.51 | 4.42     | 1152.51 | 4.42     | 1152.51 | 4.42     |
| 4.426678 | 1152.51 | 4.426678 | 1152.51 | 4.426678 | 1152.51 | 4.426678 | 1152.51 | 4.426678 |
| 4.43     | 1152.51 | 4.43     | 1152.51 | 4.43     | 1152.51 | 4.43     | 1152.51 | 4.43     |
| 4.436678 | 1152.51 | 4.436678 | 1152.51 | 4.436678 | 1152.51 | 4.436678 | 1152.51 | 4.436678 |
| 4.44     | 1152.51 | 4.44     | 1152.51 | 4.44     | 1152.51 | 4.44     | 1152.51 | 4.44     |

|          |         |            |         |          |         |          |         |          |
|----------|---------|------------|---------|----------|---------|----------|---------|----------|
| 4.446678 | 1152.51 | 4.446678   | 1152.51 | 4.446678 | 1152.51 | 4.446678 | 1152.51 | 4.446678 |
| 4.45     | 1152.51 | 4.45       | 1152.51 | 4.45     | 1152.51 | 4.45     | 1152.51 | 4.45     |
| 4.456678 | 1152.51 | 4.456678   | 1152.51 | 4.456678 | 1152.51 | 4.456678 | 1152.51 | 4.456678 |
| 4.46     | 1152.51 | 4.46       | 1152.51 | 4.46     | 1152.51 | 4.46     | 1152.51 | 4.46     |
| 4.466678 | 1152.51 | 4.466678   | 1152.51 | 4.466678 | 1152.51 | 4.466678 | 1152.51 | 4.466678 |
| 4.47     | 1152.51 | 4.47       | 1152.51 | 4.47     | 1152.51 | 4.47     | 1152.51 | 4.47     |
| 4.476678 | 1152.51 | 4.476678   | 1152.51 | 4.476678 | 1152.51 | 4.476678 | 1152.51 | 4.476678 |
| 4.48     | 1152.51 | 4.48       | 1152.51 | 4.48     | 1152.51 | 4.48     | 1152.51 | 4.48     |
| 4.486678 | 1152.51 | 4.486678   | 1152.51 | 4.486678 | 1152.51 | 4.486678 | 1152.51 | 4.486678 |
| 4.49     | 1152.51 | 4.49       | 1152.51 | 4.49     | 1152.51 | 4.49     | 1152.51 | 4.49     |
| 4.496678 | 1152.51 | 4.496678   | 1152.51 | 4.496678 | 1152.51 | 4.496678 | 1152.51 | 4.496678 |
| 4.5      | 1152.51 | 4.5        | 1152.51 | 4.5      | 1152.51 | 4.5      | 1152.51 | 4.5      |
| 4.506678 | 1152.51 | 4.506678   | 1152.51 | 4.506678 | 1152.51 | 4.506678 | 1152.51 | 4.506678 |
| 4.51     | 1152.51 | 4.51       | 1152.51 | 4.51     | 1152.51 | 4.51     | 1152.51 | 4.51     |
| 4.516678 | 1152.51 | 4.516678   | 1152.51 | 4.516678 | 1152.51 | 4.516678 | 1152.51 | 4.516678 |
| 4.52     | 1152.51 | 4.52       | 1152.51 | 4.52     | 1152.51 | 4.52     | 1152.51 | 4.52     |
| 4.526678 | 1152.51 | 4.526678   | 1152.51 | 4.526678 | 1152.51 | 4.526678 | 1152.51 | 4.526678 |
| 4.53     | 1152.51 | 4.53       | 1152.51 | 4.53     | 1152.51 | 4.53     | 1152.51 | 4.53     |
| 4.536678 | 1152.51 | 4.536678   | 1152.51 | 4.536678 | 1152.51 | 4.536678 | 1152.51 | 4.536678 |
| 4.54     | 1152.51 | 4.54       | 1152.51 | 4.54     | 1152.51 | 4.54     | 1152.51 | 4.54     |
| 4.546678 | 1152.51 | 4.546678   | 1152.51 | 4.546678 | 1152.51 | 4.546678 | 1152.51 | 4.546678 |
| 4.55     | 1152.51 | 4.55       | 1152.51 | 4.55     | 1152.51 | 4.55     | 1152.51 | 4.55     |
| 4.556678 | 1152.51 | 4.556678   | 1152.51 | 4.556678 | 1152.51 | 4.556678 | 1152.51 | 4.556678 |
| 4.56     | 1152.51 | 4.56       | 1152.51 | 4.56     | 1152.51 | 4.56     | 1152.51 | 4.56     |
| 4.566678 | 1152.51 | 4.566678   | 1152.51 | 4.566678 | 1152.51 | 4.566678 | 1152.51 | 4.566678 |
| 4.57     | 1152.51 | 4.57       | 1152.51 | 4.57     | 1152.51 | 4.57     | 1152.51 | 4.57     |
| 4.576678 | 1152.51 | 4.576678   | 1152.51 | 4.576678 | 1152.51 | 4.576678 | 1152.51 | 4.576678 |
| 4.58     | 1152.51 | 4.58       | 1152.51 | 4.58     | 1152.51 | 4.58     | 1152.51 | 4.58     |
| 4.586678 | 1152.51 | 4.586678   | 1152.51 | 4.586678 | 1152.51 | 4.586678 | 1152.51 | 4.586678 |
| 4.59     | 1152.51 | 4.59       | 1152.51 | 4.59     | 1152.51 | 4.59     | 1152.51 | 4.59     |
| 4.596678 | 1152.51 | 4.596678   | 1152.51 | 4.596678 | 1152.51 | 4.596678 | 1152.51 | 4.596678 |
| 4.6      | 1152.51 | 4.6        | 1152.51 | 4.6      | 1152.51 | 4.6      | 1152.51 | 4.6      |
| 4.606678 | 1152.51 | 4.606678   | 1152.51 | 4.606678 | 1152.51 | 4.606678 | 1152.51 | 4.606678 |
| 4.61     | 1152.51 | 4.61       | 1152.51 | 4.61     | 1152.51 | 4.61     | 1152.51 | 4.61     |
| 4.616678 | 1152.51 | 4.616678   | 1152.51 | 4.616678 | 1152.51 | 4.616678 | 1152.51 | 4.616678 |
| 4.62     | 1152.51 | 4.62       | 1152.51 | 4.62     | 1152.51 | 4.62     | 1152.51 | 4.62     |
| 4.626678 | 1152.51 | 4.626678   | 1152.51 | 4.626678 | 1152.51 | 4.626678 | 1152.51 | 4.626678 |
| 4.63     | 1152.51 | 4.63       | 1152.51 | 4.63     | 1152.51 | 4.63     | 1152.51 | 4.63     |
| 4.636678 | 1152.51 | 4.636678</ |         |          |         |          |         |          |

|          |         |          |         |          |         |          |         |          |
|----------|---------|----------|---------|----------|---------|----------|---------|----------|
| 4.68     | 1152.51 | 4.68     | 1152.51 | 4.68     | 1152.51 | 4.68     | 1152.51 | 4.68     |
| 4.686678 | 1152.51 | 4.686678 | 1152.51 | 4.686678 | 1152.51 | 4.686678 | 1152.51 | 4.686678 |
| 4.69     | 1152.51 | 4.69     | 1152.51 | 4.69     | 1152.51 | 4.69     | 1152.51 | 4.69     |
| 4.696678 | 1152.51 | 4.696678 | 1152.51 | 4.696678 | 1152.51 | 4.696678 | 1152.51 | 4.696678 |
| 4.7      | 1152.51 | 4.7      | 1152.51 | 4.7      | 1152.51 | 4.7      | 1152.51 | 4.7      |
| 4.706678 | 1152.51 | 4.706678 | 1152.51 | 4.706678 | 1152.51 | 4.706678 | 1152.51 | 4.706678 |
| 4.71     | 1152.51 | 4.71     | 1152.51 | 4.71     | 1152.51 | 4.71     | 1152.51 | 4.71     |
| 4.716678 | 1152.51 | 4.716678 | 1152.51 | 4.716678 | 1152.51 | 4.716678 | 1152.51 | 4.716678 |
| 4.72     | 1152.51 | 4.72     | 1152.51 | 4.72     | 1152.51 | 4.72     | 1152.51 | 4.72     |
| 4.726678 | 1152.51 | 4.726678 | 1152.51 | 4.726678 | 1152.51 | 4.726678 | 1152.51 | 4.726678 |
| 4.73     | 1152.51 | 4.73     | 1152.51 | 4.73     | 1152.51 | 4.73     | 1152.51 | 4.73     |
| 4.736678 | 1152.51 | 4.736678 | 1152.51 | 4.736678 | 1152.51 | 4.736678 | 1152.51 | 4.736678 |
| 4.74     | 1152.51 | 4.74     | 1152.51 | 4.74     | 1152.51 | 4.74     | 1152.51 | 4.74     |
| 4.746678 | 1152.51 | 4.746678 | 1152.51 | 4.746678 | 1152.51 | 4.746678 | 1152.51 | 4.746678 |
| 4.75     | 1152.51 | 4.75     | 1152.51 | 4.75     | 1152.51 | 4.75     | 1152.51 | 4.75     |
| 4.756678 | 1152.51 | 4.756678 | 1152.51 | 4.756678 | 1152.51 | 4.756678 | 1152.51 | 4.756678 |
| 4.76     | 1152.51 | 4.76     | 1152.51 | 4.76     | 1152.51 | 4.76     | 1152.51 | 4.76     |
| 4.766678 | 1152.51 | 4.766678 | 1152.51 | 4.766678 | 1152.51 | 4.766678 | 1152.51 | 4.766678 |
| 4.77     | 1152.51 | 4.77     | 1152.51 | 4.77     | 1152.51 | 4.77     | 1152.51 | 4.77     |
| 4.776678 | 1152.51 | 4.776678 | 1152.51 | 4.776678 | 1152.51 | 4.776678 | 1152.51 | 4.776678 |
| 4.78     | 1152.51 | 4.78     | 1152.51 | 4.78     | 1152.51 | 4.78     | 1152.51 | 4.78     |
| 4.786678 | 1152.51 | 4.786678 | 1152.51 | 4.786678 | 1152.51 | 4.786678 | 1152.51 | 4.786678 |
| 4.79     | 1152.51 | 4.79     | 1152.51 | 4.79     | 1152.51 | 4.79     | 1152.51 | 4.79     |
| 4.796678 | 1152.51 | 4.796678 | 1152.51 | 4.796678 | 1152.51 | 4.796678 | 1152.51 | 4.796678 |
| 4.8      | 1152.51 | 4.8      | 1152.51 | 4.8      | 1152.51 | 4.8      | 1152.51 | 4.8      |
| 4.806678 | 1152.51 | 4.806678 | 1152.51 | 4.806678 | 1152.51 | 4.806678 | 1152.51 | 4.806678 |
| 4.81     | 1152.51 | 4.81     | 1152.51 | 4.81     | 1152.51 | 4.81     | 1152.51 | 4.81     |
| 4.816678 | 1152.51 | 4.816678 | 1152.51 | 4.816678 | 1152.51 | 4.816678 | 1152.51 | 4.816678 |
| 4.82     | 1152.51 | 4.82     | 1152.51 | 4.82     | 1152.51 | 4.82     | 1152.51 | 4.82     |
| 4.826678 | 1152.51 | 4.826678 | 1152.51 | 4.826678 | 1152.51 | 4.826678 | 1152.51 | 4.826678 |
| 4.83     | 1152.51 | 4.83     | 1152.51 | 4.83     | 1152.51 | 4.83     | 1152.51 | 4.83     |
| 4.836678 | 1152.51 | 4.836678 | 1152.51 | 4.836678 | 1152.51 | 4.836678 | 1152.51 | 4.836678 |
| 4.84     | 1152.51 | 4.84     | 1152.51 | 4.84     | 1152.51 | 4.84     | 1152.51 | 4.84     |
| 4.846678 | 1152.51 | 4.846678 | 1152.51 | 4.846678 | 1152.51 | 4.846678 | 1152.51 | 4.846678 |
| 4.85     | 1152.51 | 4.85     | 1152.51 | 4.85     | 1152.51 | 4.85     | 1152.51 | 4.85     |
| 4.856678 | 1152.51 | 4.856678 | 1152.51 | 4.856678 | 1152.51 | 4.856678 | 1152.51 | 4.856678 |
| 4.86     | 1152.51 | 4.86     | 1152.51 | 4.86     | 1152.51 | 4.86     | 1152.51 | 4.86     |
| 4.866678 | 1152.51 | 4.866678 | 1152.51 | 4.866678 | 1152.51 | 4.866678 | 1152.51 | 4.866678 |
| 4.87     | 1152.51 | 4.87     | 1152    |          |         |          |         |          |

|          |         |          |         |          |         |          |         |          |
|----------|---------|----------|---------|----------|---------|----------|---------|----------|
| 4.916678 | 1152.51 | 4.916678 | 1152.51 | 4.916678 | 1152.51 | 4.916678 | 1152.51 | 4.916678 |
| 4.92     | 1152.51 | 4.92     | 1152.51 | 4.92     | 1152.51 | 4.92     | 1152.51 | 4.92     |
| 4.926678 | 1152.51 | 4.926678 | 1152.51 | 4.926678 | 1152.51 | 4.926678 | 1152.51 | 4.926678 |
| 4.93     | 1152.51 | 4.93     | 1152.51 | 4.93     | 1152.51 | 4.93     | 1152.51 | 4.93     |
| 4.936678 | 1152.51 | 4.936678 | 1152.51 | 4.936678 | 1152.51 | 4.936678 | 1152.51 | 4.936678 |
| 4.94     | 1152.51 | 4.94     | 1152.51 | 4.94     | 1152.51 | 4.94     | 1152.51 | 4.94     |
| 4.946678 | 1152.51 | 4.946678 | 1152.51 | 4.946678 | 1152.51 | 4.946678 | 1152.51 | 4.946678 |
| 4.95     | 1152.51 | 4.95     | 1152.51 | 4.95     | 1152.51 | 4.95     | 1152.51 | 4.95     |
| 4.956678 | 1152.51 | 4.956678 | 1152.51 | 4.956678 | 1152.51 | 4.956678 | 1152.51 | 4.956678 |
| 4.96     | 1152.51 | 4.96     | 1152.51 | 4.96     | 1152.51 | 4.96     | 1152.51 | 4.96     |
| 4.966678 | 1152.51 | 4.966678 | 1152.51 | 4.966678 | 1152.51 | 4.966678 | 1152.51 | 4.966678 |
| 4.97     | 1152.51 | 4.97     | 1152.51 | 4.97     | 1152.51 | 4.97     | 1152.51 | 4.97     |
| 4.976678 | 1152.51 | 4.976678 | 1152.51 | 4.976678 | 1152.51 | 4.976678 | 1152.51 | 4.976678 |
| 4.98     | 1152.51 | 4.98     | 1152.51 | 4.98     | 1152.51 | 4.98     | 1152.51 | 4.98     |
| 4.986678 | 1152.51 | 4.986678 | 1152.51 | 4.986678 | 1152.51 | 4.986678 | 1152.51 | 4.986678 |
| 4.99     | 1152.51 | 4.99     | 1152.51 | 4.99     | 1152.51 | 4.99     | 1152.51 | 4.99     |
| 4.996678 | 1152.51 | 4.996678 | 1152.51 | 4.996678 | 1152.51 | 4.996678 | 1152.51 | 4.996678 |
| 5        | 1152.51 | 5        | 1152.51 | 5        | 1152.51 | 5        | 1152.51 | 5        |
| 5.006678 | 1152.51 | 5.006678 | 1152.51 | 5.006678 | 1152.51 | 5.006678 | 1152.51 | 5.006678 |
| 5.01     | 1152.51 | 5.01     | 1152.51 | 5.01     | 1152.51 | 5.01     | 1152.51 | 5.01     |
| 5.016678 | 1152.51 | 5.016678 | 1152.51 | 5.016678 | 1152.51 | 5.016678 | 1152.51 | 5.016678 |
| 5.02     | 1152.51 | 5.02     | 1152.51 | 5.02     | 1152.51 | 5.02     | 1152.51 | 5.02     |
| 5.026678 | 1152.51 | 5.026678 | 1152.51 | 5.026678 | 1152.51 | 5.026678 | 1152.51 | 5.026678 |
| 5.03     | 1152.51 | 5.03     | 1152.51 | 5.03     | 1152.51 | 5.03     | 1152.51 | 5.03     |
| 5.036678 | 1152.51 | 5.036678 | 1152.51 | 5.036678 | 1152.51 | 5.036678 | 1152.51 | 5.036678 |
| 5.04     | 1152.51 | 5.04     | 1152.51 | 5.04     | 1152.51 | 5.04     | 1152.51 | 5.04     |
| 5.046678 | 1152.51 | 5.046678 | 1152.51 | 5.046678 | 1152.51 | 5.046678 | 1152.51 | 5.046678 |
| 5.05     | 1152.51 | 5.05     | 1152.51 | 5.05     | 1152.51 | 5.05     | 1152.51 | 5.05     |
| 5.056678 | 1152.51 | 5.056678 | 1152.51 | 5.056678 | 1152.51 | 5.056678 | 1152.51 | 5.056678 |
| 5.06     | 1152.51 | 5.06     | 1152.51 | 5.06     | 1152.51 | 5.06     | 1152.51 | 5.06     |
| 5.066678 | 1152.51 | 5.066678 | 1152.51 | 5.066678 | 1152.51 | 5.066678 | 1152.51 | 5.066678 |
| 5.07     | 1152.51 | 5.07     | 1152.51 | 5.07     | 1152.51 | 5.07     | 1152.51 | 5.07     |
| 5.076678 | 1152.51 | 5.076678 | 1152.51 | 5.076678 | 1152.51 | 5.076678 | 1152.51 | 5.076678 |
| 5.08     | 1152.51 | 5.08     | 1152.51 | 5.08     | 1152.51 | 5.08     | 1152.51 | 5.08     |
| 5.086678 | 1152.51 | 5.086678 | 1152.51 | 5.086678 | 1152.51 | 5.086678 | 1152.51 | 5.086678 |
| 5.09     | 1152.51 | 5.09     | 1152.51 | 5.09     | 1152.51 | 5.09     | 1152.51 | 5.09     |
| 5.096678 | 1152.51 | 5.096678 | 1152.51 | 5.096678 | 1152.51 | 5.096678 | 1152.51 | 5.096678 |
| 5.1      | 1152.51 | 5.1      | 1152.51 | 5.1      | 1152.51 | 5.1      | 1152.51 | 5.1      |
| 5.106678 | 1152.51 | 5.106678 | 1152.51 | 5.106678 | 1152.51 | 5.106678 | 1152.51 | 5.106678 |
| 5.11     | 1152.51 | 5.11     | 1152.51 | 5.11     | 1152.51 | 5.11     | 1152.51 | 5.11     |
| 5.116678 | 1152.51 | 5.116678 | 1152.51 | 5.116678 | 1152.51 | 5.116678 | 1152.51 | 5.116678 |
| 5.12     | 1152.51 | 5.12     | 1152.51 | 5.12     | 1152.51 | 5.12     | 1152.51 | 5.12     |
| 5.126678 | 1152.51 | 5.126678 | 1152.51 | 5.126678 | 1152.51 | 5.126678 | 1152.51 | 5.126678 |
| 5.13     | 1152.51 | 5.13     | 1152.51 | 5.13     | 1152.51 | 5.13     | 1152.51 | 5.13     |
| 5.136678 | 1152.51 | 5.136678 | 1152.51 | 5.136678 | 1152.51 | 5.136678 | 1152.51 | 5.136678 |
| 5.14     | 1152.51 | 5.14     | 1152.51 | 5.14     | 1152.51 | 5.14     | 1152.51 | 5.14     |
| 5.146678 | 1152.51 | 5.146678 | 1152.51 | 5.146678 | 1152.51 | 5.146678 | 1152.51 | 5.146678 |



|          |         |          |         |          |         |          |         |          |
|----------|---------|----------|---------|----------|---------|----------|---------|----------|
| 5.15     | 1152.51 | 5.15     | 1152.51 | 5.15     | 1152.51 | 5.15     | 1152.51 | 5.15     |
| 5.156678 | 1152.51 | 5.156678 | 1152.51 | 5.156678 | 1152.51 | 5.156678 | 1152.51 | 5.156678 |
| 5.16     | 1152.51 | 5.16     | 1152.51 | 5.16     | 1152.51 | 5.16     | 1152.51 | 5.16     |
| 5.166678 | 1152.51 | 5.166678 | 1152.51 | 5.166678 | 1152.51 | 5.166678 | 1152.51 | 5.166678 |
| 5.17     | 1152.51 | 5.17     | 1152.51 | 5.17     | 1152.51 | 5.17     | 1152.51 | 5.17     |
| 5.176678 | 1152.51 | 5.176678 | 1152.51 | 5.176678 | 1152.51 | 5.176678 | 1152.51 | 5.176678 |
| 5.18     | 1152.51 | 5.18     | 1152.51 | 5.18     | 1152.51 | 5.18     | 1152.51 | 5.18     |
| 5.186678 | 1152.51 | 5.186678 | 1152.51 | 5.186678 | 1152.51 | 5.186678 | 1152.51 | 5.186678 |
| 5.19     | 1152.51 | 5.19     | 1152.51 | 5.19     | 1152.51 | 5.19     | 1152.51 | 5.19     |
| 5.196678 | 1152.51 | 5.196678 | 1152.51 | 5.196678 | 1152.51 | 5.196678 | 1152.51 | 5.196678 |
| 5.2      | 1152.51 | 5.2      | 1152.51 | 5.2      | 1152.51 | 5.2      | 1152.51 | 5.2      |
| 5.206678 | 1152.51 | 5.206678 | 1152.51 | 5.206678 | 1152.51 | 5.206678 | 1152.51 | 5.206678 |
| 5.21     | 1152.51 | 5.21     | 1152.51 | 5.21     | 1152.51 | 5.21     | 1152.51 | 5.21     |
| 5.216678 | 1152.51 | 5.216678 | 1152.51 | 5.216678 | 1152.51 | 5.216678 | 1152.51 | 5.216678 |
| 5.22     | 1152.51 | 5.22     | 1152.51 | 5.22     | 1152.51 | 5.22     | 1152.51 | 5.22     |
| 5.226678 | 1152.51 | 5.226678 | 1152.51 | 5.226678 | 1152.51 | 5.226678 | 1152.51 | 5.226678 |
| 5.23     | 1152.51 | 5.23     | 1152.51 | 5.23     | 1152.51 | 5.23     | 1152.51 | 5.23     |
| 5.236678 | 1152.51 | 5.236678 | 1152.51 | 5.236678 | 1152.51 | 5.236678 | 1152.51 | 5.236678 |
| 5.24     | 1152.51 | 5.24     | 1152.51 | 5.24     | 1152.51 | 5.24     | 1152.51 | 5.24     |
| 5.246678 | 1152.51 | 5.246678 | 1152.51 | 5.246678 | 1152.51 | 5.246678 | 1152.51 | 5.246678 |
| 5.25     | 1152.51 | 5.25     | 1152.51 | 5.25     | 1152.51 | 5.25     | 1152.51 | 5.25     |
| 5.256678 | 1152.51 | 5.256678 | 1152.51 | 5.256678 | 1152.51 | 5.256678 | 1152.51 | 5.256678 |
| 5.26     | 1152.51 | 5.26     | 1152.51 | 5.26     | 1152.51 | 5.26     | 1152.51 | 5.26     |
| 5.266678 | 1152.51 | 5.266678 | 1152.51 | 5.266678 | 1152.51 | 5.266678 | 1152.51 | 5.266678 |
| 5.27     | 1152.51 | 5.27     | 1152.51 | 5.27     | 1152.51 | 5.27     | 1152.51 | 5.27     |
| 5.276678 | 1152.51 | 5.276678 | 1152.51 | 5.276678 | 1152.51 | 5.276678 | 1152.51 | 5.276678 |
| 5.28     | 1152.51 | 5.28     | 1152.51 | 5.28     | 1152.51 | 5.28     | 1152.51 | 5.28     |
| 5.286678 | 1152.51 | 5.286678 | 1152.51 | 5.286678 | 1152.51 | 5.286678 | 1152.51 | 5.286678 |
| 5.29     | 1152.51 | 5.29     | 1152.51 | 5.29     | 1152.51 | 5.29     | 1152.51 | 5.29     |
| 5.296678 | 1152.51 | 5.296678 | 1152.51 | 5.296678 | 1152.51 | 5.296678 | 1152.51 | 5.296678 |
| 5.3      | 1152.51 | 5.3      | 1152.51 | 5.3      | 1152.51 | 5.3      | 1152.51 | 5.3      |
| 5.306678 | 1152.51 | 5.306678 | 1152.51 | 5.306678 | 1152.51 | 5.306678 | 1152.51 | 5.306678 |
| 5.31     | 1152.51 | 5.31     | 1152.51 | 5.31     | 1152.51 | 5.31     | 1152.51 | 5.31     |
| 5.316678 | 1152.51 | 5.316678 | 1152.51 | 5.316678 | 1152.51 | 5.316678 | 1152.51 | 5.316678 |
| 5.32     | 1152.51 | 5.32     | 1152.51 | 5.32     | 1152.51 | 5.32     | 1152.51 | 5.32     |
| 5.326678 | 1152.51 | 5.326678 | 1152.51 | 5.326678 | 1152.51 | 5.326678 | 1152.51 | 5.326678 |
| 5.33     | 1152.51 | 5.33     | 1152.51 | 5.33     | 1152.51 | 5.33     | 1152.51 | 5.33     |
| 5.336678 | 1152.51 | 5.336678 | 1152.51 | 5.336678 | 1152.51 | 5.336678 | 1152.51 | 5.336678 |
| 5.34     | 1152.51 | 5.34     | 1152.51 | 5.34     | 1152.51 | 5.34     | 1152.51 | 5.34     |
| 5.346678 | 1152.51 | 5.346678 | 1152.51 | 5.346678 | 1152.51 | 5.346678 | 1152.51 | 5.346678 |
| 5.35     | 1152.51 | 5.35     | 1152.51 | 5.35     | 1152.51 | 5.35     | 1152.51 | 5.35     |
| 5.356678 | 1152.51 | 5.356678 | 1152.51 | 5.356678 | 1152.51 | 5.356678 | 1152.51 | 5.356678 |
| 5.36     | 1152.51 | 5.36     | 1152.51 | 5.36     | 1152.51 | 5.36     | 1152.51 | 5.36     |
| 5.366678 | 1152.51 | 5.366678 | 1152.51 | 5.366678 | 1152.51 | 5.366678 | 1152.51 | 5.366678 |
| 5.37     | 1152.51 | 5.37     | 1152.51 | 5.37     | 1152.51 | 5.37     | 1152.51 | 5.37     |
| 5.376678 | 1152.51 | 5.376678 | 1152.51 | 5.376678 | 1152.51 | 5.376678 | 1152.51 | 5.376678 |
| 5.38     | 1152.51 | 5.38     | 1152.51 | 5.38     | 1152.51 | 5.38     | 1152.51 | 5.38     |

|          |         |          |         |          |         |          |         |          |
|----------|---------|----------|---------|----------|---------|----------|---------|----------|
| 5.386678 | 1152.51 | 5.386678 | 1152.51 | 5.386678 | 1152.51 | 5.386678 | 1152.51 | 5.386678 |
| 5.39     | 1152.51 | 5.39     | 1152.51 | 5.39     | 1152.51 | 5.39     | 1152.51 | 5.39     |
| 5.396678 | 1152.51 | 5.396678 | 1152.51 | 5.396678 | 1152.51 | 5.396678 | 1152.51 | 5.396678 |
| 5.4      | 1152.51 | 5.4      | 1152.51 | 5.4      | 1152.51 | 5.4      | 1152.51 | 5.4      |
| 5.406678 | 1152.51 | 5.406678 | 1152.51 | 5.406678 | 1152.51 | 5.406678 | 1152.51 | 5.406678 |
| 5.41     | 1152.51 | 5.41     | 1152.51 | 5.41     | 1152.51 | 5.41     | 1152.51 | 5.41     |
| 5.416678 | 1152.51 | 5.416678 | 1152.51 | 5.416678 | 1152.51 | 5.416678 | 1152.51 | 5.416678 |
| 5.42     | 1152.51 | 5.42     | 1152.51 | 5.42     | 1152.51 | 5.42     | 1152.51 | 5.42     |
| 5.426678 | 1152.51 | 5.426678 | 1152.51 | 5.426678 | 1152.51 | 5.426678 | 1152.51 | 5.426678 |
| 5.43     | 1152.51 | 5.43     | 1152.51 | 5.43     | 1152.51 | 5.43     | 1152.51 | 5.43     |
| 5.436678 | 1152.51 | 5.436678 | 1152.51 | 5.436678 | 1152.51 | 5.436678 | 1152.51 | 5.436678 |
| 5.44     | 1152.51 | 5.44     | 1152.51 | 5.44     | 1152.51 | 5.44     | 1152.51 | 5.44     |
| 5.446678 | 1152.51 | 5.446678 | 1152.51 | 5.446678 | 1152.51 | 5.446678 | 1152.51 | 5.446678 |
| 5.45     | 1152.51 | 5.45     | 1152.51 | 5.45     | 1152.51 | 5.45     | 1152.51 | 5.45     |
| 5.456678 | 1152.51 | 5.456678 | 1152.51 | 5.456678 | 1152.51 | 5.456678 | 1152.51 | 5.456678 |
| 5.46     | 1152.51 | 5.46     | 1152.51 | 5.46     | 1152.51 | 5.46     | 1152.51 | 5.46     |
| 5.466678 | 1152.51 | 5.466678 | 1152.51 | 5.466678 | 1152.51 | 5.466678 | 1152.51 | 5.466678 |
| 5.47     | 1152.51 | 5.47     | 1152.51 | 5.47     | 1152.51 | 5.47     | 1152.51 | 5.47     |
| 5.476678 | 1152.51 | 5.476678 | 1152.51 | 5.476678 | 1152.51 | 5.476678 | 1152.51 | 5.476678 |
| 5.48     | 1152.51 | 5.48     | 1152.51 | 5.48     | 1152.51 | 5.48     | 1152.51 | 5.48     |
| 5.486678 | 1152.51 | 5.486678 | 1152.51 | 5.486678 | 1152.51 | 5.486678 | 1152.51 | 5.486678 |
| 5.49     | 1152.51 | 5.49     | 1152.51 | 5.49     | 1152.51 | 5.49     | 1152.51 | 5.49     |
| 5.496678 | 1152.51 | 5.496678 | 1152.51 | 5.496678 | 1152.51 | 5.496678 | 1152.51 | 5.496678 |
| 5.5      | 1152.51 | 5.5      | 1152.51 | 5.5      | 1152.51 | 5.5      | 1152.51 | 5.5      |
| 5.506678 | 1152.51 | 5.506678 | 1152.51 | 5.506678 | 1152.51 | 5.506678 | 1152.51 | 5.506678 |
| 5.51     | 1152.51 | 5.51     | 1152.51 | 5.51     | 1152.51 | 5.51     | 1152.51 | 5.51     |
| 5.516678 | 1152.51 | 5.516678 | 1152.51 | 5.516678 | 1152.51 | 5.516678 | 1152.51 | 5.516678 |
| 5.52     | 1152.51 | 5.52     | 1152.51 | 5.52     | 1152.51 | 5.52     | 1152.51 | 5.52     |
| 5.526678 | 1152.51 | 5.526678 | 1152.51 | 5.526678 | 1152.51 | 5.526678 | 1152.51 | 5.526678 |
| 5.53     | 1152.51 | 5.53     | 1152.51 | 5.53     | 1152.51 | 5.53     | 1152.51 | 5.53     |
| 5.536678 | 1152.51 | 5.536678 | 1152.51 | 5.536678 | 1152.51 | 5.536678 | 1152.51 | 5.536678 |
| 5.54     | 1152.51 | 5.54     | 1152.51 | 5.54     | 1152.51 | 5.54     | 1152.51 | 5.54     |
| 5.546678 | 1152.51 | 5.546678 | 1152.51 | 5.546678 | 1152.51 | 5.546678 | 1152.51 | 5.546678 |
| 5.55     | 1152.51 | 5.55     | 1152.51 | 5.55     | 1152.51 | 5.55     | 1152.51 | 5.55     |
| 5.556678 | 1152.51 | 5.556678 | 1152.51 | 5.556678 | 1152.51 | 5.556678 | 1152.51 | 5.556678 |
| 5.56     | 1152.51 | 5.56     | 1152.51 | 5.56     | 1152.51 | 5.56     | 1152.51 | 5.56     |
| 5.566678 | 1152.51 | 5.566678 | 1152.51 | 5.566678 | 1152.51 | 5.566678 | 1152.51 | 5.566678 |
| 5.57     | 1152.51 | 5.57     | 1152.51 | 5.57     | 1152.51 | 5.57     | 1152.51 | 5.57     |
| 5.576678 | 1152.51 | 5.576678 | 1152.51 | 5.576678 | 1152.51 | 5.576678 | 1152.51 | 5.576678 |
| 5.58     | 1152.51 | 5.58     | 1152.51 | 5.58     | 1152.51 | 5.58     | 1152.51 | 5.58     |
| 5.586678 | 1152.51 | 5.586678 | 1152.51 | 5.586678 | 1152.51 | 5.586678 | 1152.51 | 5.586678 |
| 5.59     | 1152.51 | 5.59     | 1152.51 | 5.59     | 1152.51 | 5.59     | 1152.51 | 5.59     |
| 5.596678 | 1152.51 | 5.596678 | 1152.51 | 5.596678 | 1152.51 | 5.596678 | 1152.51 | 5.596678 |
| 5.6      | 1152.51 | 5.6      | 1152.51 | 5.6      | 1152.51 | 5.6      | 1152.51 | 5.6      |
| 5.606678 | 1152.51 | 5.606678 | 1152.51 | 5.606678 | 1152.51 | 5.606678 | 1152.51 | 5.606678 |
| 5.61     | 1152.51 | 5.61     | 1152.51 | 5.61     | 1152.51 | 5.61     | 1152.51 | 5.61     |
| 5.616678 | 1152.51 | 5.616678 | 1152.51 | 5.616678 | 1152.51 | 5.616678 | 1152.51 | 5.616678 |

|          |         |          |         |          |         |          |         |          |
|----------|---------|----------|---------|----------|---------|----------|---------|----------|
| 5.62     | 1152.51 | 5.62     | 1152.51 | 5.62     | 1152.51 | 5.62     | 1152.51 | 5.62     |
| 5.626678 | 1152.51 | 5.626678 | 1152.51 | 5.626678 | 1152.51 | 5.626678 | 1152.51 | 5.626678 |
| 5.63     | 1152.51 | 5.63     | 1152.51 | 5.63     | 1152.51 | 5.63     | 1152.51 | 5.63     |
| 5.636678 | 1152.51 | 5.636678 | 1152.51 | 5.636678 | 1152.51 | 5.636678 | 1152.51 | 5.636678 |
| 5.64     | 1152.51 | 5.64     | 1152.51 | 5.64     | 1152.51 | 5.64     | 1152.51 | 5.64     |
| 5.646678 | 1152.51 | 5.646678 | 1152.51 | 5.646678 | 1152.51 | 5.646678 | 1152.51 | 5.646678 |
| 5.65     | 1152.51 | 5.65     | 1152.51 | 5.65     | 1152.51 | 5.65     | 1152.51 | 5.65     |
| 5.656678 | 1152.51 | 5.656678 | 1152.51 | 5.656678 | 1152.51 | 5.656678 | 1152.51 | 5.656678 |
| 5.66     | 1152.51 | 5.66     | 1152.51 | 5.66     | 1152.51 | 5.66     | 1152.51 | 5.66     |
| 5.666678 | 1152.51 | 5.666678 | 1152.51 | 5.666678 | 1152.51 | 5.666678 | 1152.51 | 5.666678 |
| 5.67     | 1152.51 | 5.67     | 1152.51 | 5.67     | 1152.51 | 5.67     | 1152.51 | 5.67     |
| 5.676678 | 1152.51 | 5.676678 | 1152.51 | 5.676678 | 1152.51 | 5.676678 | 1152.51 | 5.676678 |
| 5.68     | 1152.51 | 5.68     | 1152.51 | 5.68     | 1152.51 | 5.68     | 1152.51 | 5.68     |
| 5.686678 | 1152.51 | 5.686678 | 1152.51 | 5.686678 | 1152.51 | 5.686678 | 1152.51 | 5.686678 |
| 5.69     | 1152.51 | 5.69     | 1152.51 | 5.69     | 1152.51 | 5.69     | 1152.51 | 5.69     |
| 5.696678 | 1152.51 | 5.696678 | 1152.51 | 5.696678 | 1152.51 | 5.696678 | 1152.51 | 5.696678 |
| 5.7      | 1152.51 | 5.7      | 1152.51 | 5.7      | 1152.51 | 5.7      | 1152.51 | 5.7      |
| 5.706678 | 1152.51 | 5.706678 | 1152.51 | 5.706678 | 1152.51 | 5.706678 | 1152.51 | 5.706678 |
| 5.71     | 1152.51 | 5.71     | 1152.51 | 5.71     | 1152.51 | 5.71     | 1152.51 | 5.71     |
| 5.716678 | 1152.51 | 5.716678 | 1152.51 | 5.716678 | 1152.51 | 5.716678 | 1152.51 | 5.716678 |
| 5.72     | 1152.51 | 5.72     | 1152.51 | 5.72     | 1152.51 | 5.72     | 1152.51 | 5.72     |
| 5.726678 | 1152.51 | 5.726678 | 1152.51 | 5.726678 | 1152.51 | 5.726678 | 1152.51 | 5.726678 |
| 5.73     | 1152.51 | 5.73     | 1152.51 | 5.73     | 1152.51 | 5.73     | 1152.51 | 5.73     |
| 5.736678 | 1152.51 | 5.736678 | 1152.51 | 5.736678 | 1152.51 | 5.736678 | 1152.51 | 5.736678 |
| 5.74     | 1152.51 | 5.74     | 1152.51 | 5.74     | 1152.51 | 5.74     | 1152.51 | 5.74     |
| 5.746678 | 1152.51 | 5.746678 | 1152.51 | 5.746678 | 1152.51 | 5.746678 | 1152.51 | 5.746678 |
| 5.75     | 1152.51 | 5.75     | 1152.51 | 5.75     | 1152.51 | 5.75     | 1152.51 | 5.75     |
| 5.756678 | 1152.51 | 5.756678 | 1152.51 | 5.756678 | 1152.51 | 5.756678 | 1152.51 | 5.756678 |
| 5.76     | 1152.51 | 5.76     | 1152.51 | 5.76     | 1152.51 | 5.76     | 1152.51 | 5.76     |
| 5.766678 | 1152.51 | 5.766678 | 1152.51 | 5.766678 | 1152.51 | 5.766678 | 1152.51 | 5.766678 |
| 5.77     | 1152.51 | 5.77     | 1152.51 | 5.77     | 1152.51 | 5.77     | 1152.51 | 5.77     |
| 5.776678 | 1152.51 | 5.776678 | 1152.51 | 5.776678 | 1152.51 | 5.776678 | 1152.51 | 5.776678 |
| 5.78     | 1152.51 | 5.78     | 1152.51 | 5.78     | 1152.51 | 5.78     | 1152.51 | 5.78     |
| 5.786678 | 1152.51 | 5.786678 | 1152.51 | 5.786678 | 1152.51 | 5.786678 | 1152.51 | 5.786678 |
| 5.79     | 1152.51 | 5.79     | 1152.51 | 5.79     | 1152.51 | 5.79     | 1152.51 | 5.79     |
| 5.796678 | 1152.51 | 5.796678 | 1152.51 | 5.796678 | 1152.51 | 5.796678 | 1152.51 | 5.796678 |
| 5.8      | 1152.51 | 5.8      | 1152.51 | 5.8      | 1152.51 | 5.8      | 1152.51 | 5.8      |
| 5.806678 | 1152.51 | 5.806678 | 1152.51 | 5.806678 | 1152.51 | 5.806678 | 1152.51 | 5.806678 |
| 5.81     | 1152.51 | 5.81     | 1152.51 | 5.81     | 1152.51 | 5.81     | 1152.51 | 5.81     |
| 5.816678 | 1152.51 | 5.816678 | 1152.51 | 5.816678 | 1152.51 | 5.816678 | 1152.51 | 5.816678 |
| 5.82     | 1152.51 | 5.82     | 1152.51 | 5.82     | 1152.51 | 5.82     | 1152.51 | 5.82     |
| 5.826678 | 1152.51 | 5.826678 | 1152.51 | 5.826678 | 1152.51 | 5.826678 | 1152.51 | 5.826678 |
| 5.83     | 1152.51 | 5.83     | 1152.51 | 5.83     | 1152.51 | 5.83     | 1152.51 | 5.83     |
| 5.836678 | 1152.51 | 5.836678 | 1152.51 | 5.836678 | 1152.51 | 5.836678 | 1152.51 | 5.836678 |
| 5.84     | 1152.51 | 5.84     | 1152.51 | 5.84     | 1152.51 | 5.84     | 1152.51 | 5.84     |
| 5.846678 | 1152.51 | 5.846678 | 1152.51 | 5.846678 | 1152.51 | 5.846678 | 1152.51 | 5.846678 |
| 5.85     | 1152.51 | 5.85     | 1152.51 | 5.85     | 1152.51 | 5.85     | 1152.51 | 5.85     |

|          |         |          |         |          |         |          |         |          |
|----------|---------|----------|---------|----------|---------|----------|---------|----------|
| 5.856678 | 1152.51 | 5.856678 | 1152.51 | 5.856678 | 1152.51 | 5.856678 | 1152.51 | 5.856678 |
| 5.86     | 1152.51 | 5.86     | 1152.51 | 5.86     | 1152.51 | 5.86     | 1152.51 | 5.86     |
| 5.866678 | 1152.51 | 5.866678 | 1152.51 | 5.866678 | 1152.51 | 5.866678 | 1152.51 | 5.866678 |
| 5.87     | 1152.51 | 5.87     | 1152.51 | 5.87     | 1152.51 | 5.87     | 1152.51 | 5.87     |
| 5.876678 | 1152.51 | 5.876678 | 1152.51 | 5.876678 | 1152.51 | 5.876678 | 1152.51 | 5.876678 |
| 5.88     | 1152.51 | 5.88     | 1152.51 | 5.88     | 1152.51 | 5.88     | 1152.51 | 5.88     |
| 5.886678 | 1152.51 | 5.886678 | 1152.51 | 5.886678 | 1152.51 | 5.886678 | 1152.51 | 5.886678 |
| 5.89     | 1152.51 | 5.89     | 1152.51 | 5.89     | 1152.51 | 5.89     | 1152.51 | 5.89     |
| 5.896678 | 1152.51 | 5.896678 | 1152.51 | 5.896678 | 1152.51 | 5.896678 | 1152.51 | 5.896678 |
| 5.9      | 1152.51 | 5.9      | 1152.51 | 5.9      | 1152.51 | 5.9      | 1152.51 | 5.9      |
| 5.906678 | 1152.51 | 5.906678 | 1152.51 | 5.906678 | 1152.51 | 5.906678 | 1152.51 | 5.906678 |
| 5.91     | 1152.51 | 5.91     | 1152.51 | 5.91     | 1152.51 | 5.91     | 1152.51 | 5.91     |
| 5.916678 | 1152.51 | 5.916678 | 1152.51 | 5.916678 | 1152.51 | 5.916678 | 1152.51 | 5.916678 |
| 5.92     | 1152.51 | 5.92     | 1152.51 | 5.92     | 1152.51 | 5.92     | 1152.51 | 5.92     |
| 5.926678 | 1152.51 | 5.926678 | 1152.51 | 5.926678 | 1152.51 | 5.926678 | 1152.51 | 5.926678 |
| 5.93     | 1152.51 | 5.93     | 1152.51 | 5.93     | 1152.51 | 5.93     | 1152.51 | 5.93     |
| 5.936678 | 1152.51 | 5.936678 | 1152.51 | 5.936678 | 1152.51 | 5.936678 | 1152.51 | 5.936678 |
| 5.94     | 1152.51 | 5.94     | 1152.51 | 5.94     | 1152.51 | 5.94     | 1152.51 | 5.94     |
| 5.946678 | 1152.51 | 5.946678 | 1152.51 | 5.946678 | 1152.51 | 5.946678 | 1152.51 | 5.946678 |
| 5.95     | 1152.51 | 5.95     | 1152.51 | 5.95     | 1152.51 | 5.95     | 1152.51 | 5.95     |
| 5.956678 | 1152.51 | 5.956678 | 1152.51 | 5.956678 | 1152.51 | 5.956678 | 1152.51 | 5.956678 |
| 5.96     | 1152.51 | 5.96     | 1152.51 | 5.96     | 1152.51 | 5.96     | 1152.51 | 5.96     |
| 5.966678 | 1152.51 | 5.966678 | 1152.51 | 5.966678 | 1152.51 | 5.966678 | 1152.51 | 5.966678 |
| 5.97     | 1152.51 | 5.97     | 1152.51 | 5.97     | 1152.51 | 5.97     | 1152.51 | 5.97     |
| 5.976678 | 1152.51 | 5.976678 | 1152.51 | 5.976678 | 1152.51 | 5.976678 | 1152.51 | 5.976678 |
| 5.98     | 1152.51 | 5.98     | 1152.51 | 5.98     | 1152.51 | 5.98     | 1152.51 | 5.98     |
| 5.986678 | 1152.51 | 5.986678 | 1152.51 | 5.986678 | 1152.51 | 5.986678 | 1152.51 | 5.986678 |
| 5.99     | 1152.51 | 5.99     | 1152.51 | 5.99     | 1152.51 | 5.99     | 1152.51 | 5.99     |
| 5.996678 | 1152.51 | 5.996678 | 1152.51 | 5.996678 | 1152.51 | 5.996678 | 1152.51 | 5.996678 |
| 6        | 1152.51 | 6        | 1152.51 | 6        | 1152.51 | 6        | 1152.51 | 6        |
| 6.006678 | 1152.51 | 6.006678 | 1152.51 | 6.006678 | 1152.51 | 6.006678 | 1152.51 | 6.006678 |
| 6.01     | 1152.51 | 6.01     | 1152.51 | 6.01     | 1152.51 | 6.01     | 1152.51 | 6.01     |
| 6.016678 | 1152.51 | 6.016678 | 1152.51 | 6.016678 | 1152.51 | 6.016678 | 1152.51 | 6.016678 |
| 6.02     | 1152.51 | 6.02     | 1152.51 | 6.02     | 1152.51 | 6.02     | 1152.51 | 6.02     |
| 6.026678 | 1152.51 | 6.026678 | 1152.51 | 6.026678 | 1152.51 | 6.026678 | 1152.51 | 6.026678 |
| 6.03     | 1152.51 | 6.03     | 1152.51 | 6.03     | 1152.51 | 6.03     | 1152.51 | 6.03     |
| 6.036678 | 1152.51 | 6.036678 | 1152.51 | 6.036678 | 1152.51 | 6.036678 | 1152.51 | 6.036678 |
| 6.04     | 1152.51 | 6.04     | 1152.51 | 6.04     | 1152.51 | 6.04     | 1152.51 | 6.04     |
| 6.046678 | 1152.51 | 6.046678 | 1152.5  |          |         |          |         |          |

|          |         |          |         |          |         |          |         |          |
|----------|---------|----------|---------|----------|---------|----------|---------|----------|
| 6.09     | 1152.51 | 6.09     | 1152.51 | 6.09     | 1152.51 | 6.09     | 1152.51 | 6.09     |
| 6.096678 | 1152.51 | 6.096678 | 1152.51 | 6.096678 | 1152.51 | 6.096678 | 1152.51 | 6.096678 |
| 6.1      | 1152.51 | 6.1      | 1152.51 | 6.1      | 1152.51 | 6.1      | 1152.51 | 6.1      |
| 6.106678 | 1152.51 | 6.106678 | 1152.51 | 6.106678 | 1152.51 | 6.106678 | 1152.51 | 6.106678 |
| 6.11     | 1152.51 | 6.11     | 1152.51 | 6.11     | 1152.51 | 6.11     | 1152.51 | 6.11     |
| 6.116678 | 1152.51 | 6.116678 | 1152.51 | 6.116678 | 1152.51 | 6.116678 | 1152.51 | 6.116678 |
| 6.12     | 1152.51 | 6.12     | 1152.51 | 6.12     | 1152.51 | 6.12     | 1152.51 | 6.12     |
| 6.126678 | 1152.51 | 6.126678 | 1152.51 | 6.126678 | 1152.51 | 6.126678 | 1152.51 | 6.126678 |
| 6.13     | 1152.51 | 6.13     | 1152.51 | 6.13     | 1152.51 | 6.13     | 1152.51 | 6.13     |
| 6.136678 | 1152.51 | 6.136678 | 1152.51 | 6.136678 | 1152.51 | 6.136678 | 1152.51 | 6.136678 |
| 6.14     | 1152.51 | 6.14     | 1152.51 | 6.14     | 1152.51 | 6.14     | 1152.51 | 6.14     |
| 6.146678 | 1152.51 | 6.146678 | 1152.51 | 6.146678 | 1152.51 | 6.146678 | 1152.51 | 6.146678 |
| 6.15     | 1152.51 | 6.15     | 1152.51 | 6.15     | 1152.51 | 6.15     | 1152.51 | 6.15     |
| 6.156678 | 1152.51 | 6.156678 | 1152.51 | 6.156678 | 1152.51 | 6.156678 | 1152.51 | 6.156678 |
| 6.16     | 1152.51 | 6.16     | 1152.51 | 6.16     | 1152.51 | 6.16     | 1152.51 | 6.16     |
| 6.166678 | 1152.51 | 6.166678 | 1152.51 | 6.166678 | 1152.51 | 6.166678 | 1152.51 | 6.166678 |
| 6.17     | 1152.51 | 6.17     | 1152.51 | 6.17     | 1152.51 | 6.17     | 1152.51 | 6.17     |
| 6.176678 | 1152.51 | 6.176678 | 1152.51 | 6.176678 | 1152.51 | 6.176678 | 1152.51 | 6.176678 |
| 6.18     | 1152.51 | 6.18     | 1152.51 | 6.18     | 1152.51 | 6.18     | 1152.51 | 6.18     |
| 6.186678 | 1152.51 | 6.186678 | 1152.51 | 6.186678 | 1152.51 | 6.186678 | 1152.51 | 6.186678 |
| 6.19     | 1152.51 | 6.19     | 1152.51 | 6.19     | 1152.51 | 6.19     | 1152.51 | 6.19     |
| 6.196678 | 1152.51 | 6.196678 | 1152.51 | 6.196678 | 1152.51 | 6.196678 | 1152.51 | 6.196678 |
| 6.2      | 1152.51 | 6.2      | 1152.51 | 6.2      | 1152.51 | 6.2      | 1152.51 | 6.2      |
| 6.206678 | 1152.51 | 6.206678 | 1152.51 | 6.206678 | 1152.51 | 6.206678 | 1152.51 | 6.206678 |
| 6.21     | 1152.51 | 6.21     | 1152.51 | 6.21     | 1152.51 | 6.21     | 1152.51 | 6.21     |
| 6.216678 | 1152.51 | 6.216678 | 1152.51 | 6.216678 | 1152.51 | 6.216678 | 1152.51 | 6.216678 |
| 6.22     | 1152.51 | 6.22     | 1152.51 | 6.22     | 1152.51 | 6.22     | 1152.51 | 6.22     |
| 6.226678 | 1152.51 | 6.226678 | 1152.51 | 6.226678 | 1152.51 | 6.226678 | 1152.51 | 6.226678 |
| 6.23     | 1152.51 | 6.23     | 1152.51 | 6.23     | 1152.51 | 6.23     | 1152.51 | 6.23     |
| 6.236678 | 1152.51 | 6.236678 | 1152.51 | 6.236678 | 1152.51 | 6.236678 | 1152.51 | 6.236678 |
| 6.24     | 1152.51 | 6.24     | 1152.51 | 6.24     | 1152.51 | 6.24     | 1152.51 | 6.24     |
| 6.246678 | 1152.51 | 6.246678 | 1152.51 | 6.246678 | 1152.51 | 6.246678 | 1152.51 | 6.246678 |
| 6.25     | 1152.51 | 6.25     | 1152.51 | 6.25     | 1152.51 | 6.25     | 1152.51 | 6.25     |
| 6.256678 | 1152.51 | 6.256678 | 1152.51 | 6.256678 | 1152.51 | 6.256678 | 1152.51 | 6.256678 |
| 6.26     | 1152.51 | 6.26     | 1152.51 | 6.26     | 1152.51 | 6.26     | 1152.51 | 6.26     |
| 6.266678 | 1152.51 | 6.266678 | 1152.51 | 6.266678 | 1152.51 | 6.266678 | 1152.51 | 6.266678 |
| 6.27     | 1152.51 | 6.27     | 1152.51 | 6.27     | 1152.51 | 6.27     | 1152.51 | 6.27     |
| 6.276678 | 1152.51 | 6.276678 | 1152.51 | 6.276678 | 1152.51 | 6.276678 | 1152.51 | 6.276678 |
| 6.28     | 1152.51 | 6.28     | 1152.51 | 6.28     | 1152.51 | 6.28     | 1152.51 | 6.28     |
| 6.286678 | 1152.51 | 6.286678 | 1152.51 | 6.286678 | 1152.51 | 6.286678 | 1152.51 | 6.286678 |
| 6.29     | 1152.51 | 6.29     | 1152.51 | 6.29     | 1152.51 | 6.29     | 1152.51 | 6.29     |
| 6.296678 | 1152.51 | 6.296678 | 1152.51 | 6.296678 | 1152.51 | 6.296678 | 1152.51 | 6.296678 |
| 6.3      | 1152.51 | 6.3      | 1152.51 | 6.3      | 1152.51 | 6.3      | 1152.51 | 6.3      |
| 6.306678 | 1152.51 | 6.306678 | 1152.51 | 6.306678 | 1152.51 | 6.306678 | 1152.51 | 6.306678 |
| 6.31     | 1152.51 | 6.31     | 1152.51 | 6.31     | 1152.51 | 6.31     | 1152.51 | 6.31     |
| 6.316678 | 1152.51 | 6.316678 | 1152.51 | 6.316678 | 1152.51 | 6.316678 | 1152.51 | 6.316678 |
| 6.32     | 1152.51 | 6.32     | 1152.51 | 6.32     | 1152.51 | 6.32     | 1152.51 | 6.32     |

|          |         |            |         |          |         |          |         |          |
|----------|---------|------------|---------|----------|---------|----------|---------|----------|
| 6.326678 | 1152.51 | 6.326678   | 1152.51 | 6.326678 | 1152.51 | 6.326678 | 1152.51 | 6.326678 |
| 6.33     | 1152.51 | 6.33       | 1152.51 | 6.33     | 1152.51 | 6.33     | 1152.51 | 6.33     |
| 6.336678 | 1152.51 | 6.336678   | 1152.51 | 6.336678 | 1152.51 | 6.336678 | 1152.51 | 6.336678 |
| 6.34     | 1152.51 | 6.34       | 1152.51 | 6.34     | 1152.51 | 6.34     | 1152.51 | 6.34     |
| 6.346678 | 1152.51 | 6.346678   | 1152.51 | 6.346678 | 1152.51 | 6.346678 | 1152.51 | 6.346678 |
| 6.35     | 1152.51 | 6.35       | 1152.51 | 6.35     | 1152.51 | 6.35     | 1152.51 | 6.35     |
| 6.356678 | 1152.51 | 6.356678   | 1152.51 | 6.356678 | 1152.51 | 6.356678 | 1152.51 | 6.356678 |
| 6.36     | 1152.51 | 6.36       | 1152.51 | 6.36     | 1152.51 | 6.36     | 1152.51 | 6.36     |
| 6.366678 | 1152.51 | 6.366678   | 1152.51 | 6.366678 | 1152.51 | 6.366678 | 1152.51 | 6.366678 |
| 6.37     | 1152.51 | 6.37       | 1152.51 | 6.37     | 1152.51 | 6.37     | 1152.51 | 6.37     |
| 6.376678 | 1152.51 | 6.376678   | 1152.51 | 6.376678 | 1152.51 | 6.376678 | 1152.51 | 6.376678 |
| 6.38     | 1152.51 | 6.38       | 1152.51 | 6.38     | 1152.51 | 6.38     | 1152.51 | 6.38     |
| 6.386678 | 1152.51 | 6.386678   | 1152.51 | 6.386678 | 1152.51 | 6.386678 | 1152.51 | 6.386678 |
| 6.39     | 1152.51 | 6.39       | 1152.51 | 6.39     | 1152.51 | 6.39     | 1152.51 | 6.39     |
| 6.396678 | 1152.51 | 6.396678   | 1152.51 | 6.396678 | 1152.51 | 6.396678 | 1152.51 | 6.396678 |
| 6.4      | 1152.51 | 6.4        | 1152.51 | 6.4      | 1152.51 | 6.4      | 1152.51 | 6.4      |
| 6.406678 | 1152.51 | 6.406678   | 1152.51 | 6.406678 | 1152.51 | 6.406678 | 1152.51 | 6.406678 |
| 6.41     | 1152.51 | 6.41       | 1152.51 | 6.41     | 1152.51 | 6.41     | 1152.51 | 6.41     |
| 6.416678 | 1152.51 | 6.416678   | 1152.51 | 6.416678 | 1152.51 | 6.416678 | 1152.51 | 6.416678 |
| 6.42     | 1152.51 | 6.42       | 1152.51 | 6.42     | 1152.51 | 6.42     | 1152.51 | 6.42     |
| 6.426678 | 1152.51 | 6.426678   | 1152.51 | 6.426678 | 1152.51 | 6.426678 | 1152.51 | 6.426678 |
| 6.43     | 1152.51 | 6.43       | 1152.51 | 6.43     | 1152.51 | 6.43     | 1152.51 | 6.43     |
| 6.436678 | 1152.51 | 6.436678   | 1152.51 | 6.436678 | 1152.51 | 6.436678 | 1152.51 | 6.436678 |
| 6.44     | 1152.51 | 6.44       | 1152.51 | 6.44     | 1152.51 | 6.44     | 1152.51 | 6.44     |
| 6.446678 | 1152.51 | 6.446678   | 1152.51 | 6.446678 | 1152.51 | 6.446678 | 1152.51 | 6.446678 |
| 6.45     | 1152.51 | 6.45       | 1152.51 | 6.45     | 1152.51 | 6.45     | 1152.51 | 6.45     |
| 6.456678 | 1152.51 | 6.456678   | 1152.51 | 6.456678 | 1152.51 | 6.456678 | 1152.51 | 6.456678 |
| 6.46     | 1152.51 | 6.46       | 1152.51 | 6.46     | 1152.51 | 6.46     | 1152.51 | 6.46     |
| 6.466678 | 1152.51 | 6.466678   | 1152.51 | 6.466678 | 1152.51 | 6.466678 | 1152.51 | 6.466678 |
| 6.47     | 1152.51 | 6.47       | 1152.51 | 6.47     | 1152.51 | 6.47     | 1152.51 | 6.47     |
| 6.476678 | 1152.51 | 6.476678   | 1152.51 | 6.476678 | 1152.51 | 6.476678 | 1152.51 | 6.476678 |
| 6.48     | 1152.51 | 6.48       | 1152.51 | 6.48     | 1152.51 | 6.48     | 1152.51 | 6.48     |
| 6.486678 | 1152.51 | 6.486678   | 1152.51 | 6.486678 | 1152.51 | 6.486678 | 1152.51 | 6.486678 |
| 6.49     | 1152.51 | 6.49       | 1152.51 | 6.49     | 1152.51 | 6.49     | 1152.51 | 6.49     |
| 6.496678 | 1152.51 | 6.496678   | 1152.51 | 6.496678 | 1152.51 | 6.496678 | 1152.51 | 6.496678 |
| 6.5      | 1152.51 | 6.5        | 1152.51 | 6.5      | 1152.51 | 6.5      | 1152.51 | 6.5      |
| 6.506678 | 1152.51 | 6.506678   | 1152.51 | 6.506678 | 1152.51 | 6.506678 | 1152.51 | 6.506678 |
| 6.51     | 1152.51 | 6.51       | 1152.51 | 6.51     | 1152.51 | 6.51     | 1152.51 | 6.51     |
| 6.516678 | 1152.51 | 6.516678</ |         |          |         |          |         |          |

|          |         |          |         |          |         |          |         |          |
|----------|---------|----------|---------|----------|---------|----------|---------|----------|
| 6.56     | 1152.51 | 6.56     | 1152.51 | 6.56     | 1152.51 | 6.56     | 1152.51 | 6.56     |
| 6.566678 | 1152.51 | 6.566678 | 1152.51 | 6.566678 | 1152.51 | 6.566678 | 1152.51 | 6.566678 |
| 6.57     | 1152.51 | 6.57     | 1152.51 | 6.57     | 1152.51 | 6.57     | 1152.51 | 6.57     |
| 6.576678 | 1152.51 | 6.576678 | 1152.51 | 6.576678 | 1152.51 | 6.576678 | 1152.51 | 6.576678 |
| 6.58     | 1152.51 | 6.58     | 1152.51 | 6.58     | 1152.51 | 6.58     | 1152.51 | 6.58     |
| 6.586678 | 1152.51 | 6.586678 | 1152.51 | 6.586678 | 1152.51 | 6.586678 | 1152.51 | 6.586678 |
| 6.59     | 1152.51 | 6.59     | 1152.51 | 6.59     | 1152.51 | 6.59     | 1152.51 | 6.59     |
| 6.596678 | 1152.51 | 6.596678 | 1152.51 | 6.596678 | 1152.51 | 6.596678 | 1152.51 | 6.596678 |
| 6.6      | 1152.51 | 6.6      | 1152.51 | 6.6      | 1152.51 | 6.6      | 1152.51 | 6.6      |
| 6.606678 | 1152.51 | 6.606678 | 1152.51 | 6.606678 | 1152.51 | 6.606678 | 1152.51 | 6.606678 |
| 6.61     | 1152.51 | 6.61     | 1152.51 | 6.61     | 1152.51 | 6.61     | 1152.51 | 6.61     |
| 6.616678 | 1152.51 | 6.616678 | 1152.51 | 6.616678 | 1152.51 | 6.616678 | 1152.51 | 6.616678 |
| 6.62     | 1152.51 | 6.62     | 1152.51 | 6.62     | 1152.51 | 6.62     | 1152.51 | 6.62     |
| 6.626678 | 1152.51 | 6.626678 | 1152.51 | 6.626678 | 1152.51 | 6.626678 | 1152.51 | 6.626678 |
| 6.63     | 1152.51 | 6.63     | 1152.51 | 6.63     | 1152.51 | 6.63     | 1152.51 | 6.63     |
| 6.636678 | 1152.51 | 6.636678 | 1152.51 | 6.636678 | 1152.51 | 6.636678 | 1152.51 | 6.636678 |
| 6.64     | 1152.51 | 6.64     | 1152.51 | 6.64     | 1152.51 | 6.64     | 1152.51 | 6.64     |
| 6.646678 | 1152.51 | 6.646678 | 1152.51 | 6.646678 | 1152.51 | 6.646678 | 1152.51 | 6.646678 |
| 6.65     | 1152.51 | 6.65     | 1152.51 | 6.65     | 1152.51 | 6.65     | 1152.51 | 6.65     |
| 6.656678 | 1152.51 | 6.656678 | 1152.51 | 6.656678 | 1152.51 | 6.656678 | 1152.51 | 6.656678 |
| 6.66     | 1152.51 | 6.66     | 1152.51 | 6.66     | 1152.51 | 6.66     | 1152.51 | 6.66     |
| 6.666678 | 1152.51 | 6.666678 | 1152.51 | 6.666678 | 1152.51 | 6.666678 | 1152.51 | 6.666678 |
| 6.67     | 1152.51 | 6.67     | 1152.51 | 6.67     | 1152.51 | 6.67     | 1152.51 | 6.67     |
| 6.676678 | 1152.51 | 6.676678 | 1152.51 | 6.676678 | 1152.51 | 6.676678 | 1152.51 | 6.676678 |
| 6.68     | 1152.51 | 6.68     | 1152.51 | 6.68     | 1152.51 | 6.68     | 1152.51 | 6.68     |
| 6.686678 | 1152.51 | 6.686678 | 1152.51 | 6.686678 | 1152.51 | 6.686678 | 1152.51 | 6.686678 |
| 6.69     | 1152.51 | 6.69     | 1152.51 | 6.69     | 1152.51 | 6.69     | 1152.51 | 6.69     |
| 6.696678 | 1152.51 | 6.696678 | 1152.51 | 6.696678 | 1152.51 | 6.696678 | 1152.51 | 6.696678 |
| 6.7      | 1152.51 | 6.7      | 1152.51 | 6.7      | 1152.51 | 6.7      | 1152.51 | 6.7      |
| 6.706678 | 1152.51 | 6.706678 | 1152.51 | 6.706678 | 1152.51 | 6.706678 | 1152.51 | 6.706678 |
| 6.71     | 1152.51 | 6.71     | 1152.51 | 6.71     | 1152.51 | 6.71     | 1152.51 | 6.71     |
| 6.716678 | 1152.51 | 6.716678 | 1152.51 | 6.716678 | 1152.51 | 6.716678 | 1152.51 | 6.716678 |
| 6.72     | 1152.51 | 6.72     | 1152.51 | 6.72     | 1152.51 | 6.72     | 1152.51 | 6.72     |
| 6.726678 | 1152.51 | 6.726678 | 1152.51 | 6.726678 | 1152.51 | 6.726678 | 1152.51 | 6.726678 |
| 6.73     | 1152.51 | 6.73     | 1152.51 | 6.73     | 1152.51 | 6.73     | 1152.51 | 6.73     |
| 6.736678 | 1152.51 | 6.736678 | 1152.51 | 6.736678 | 1152.51 | 6.736678 | 1152.51 | 6.736678 |
| 6.74     | 1152.51 | 6.74     | 1152.51 | 6.74     | 1152.51 | 6.74     | 1152.51 | 6.74     |
| 6.746678 | 1152.51 | 6.746678 | 1152.51 | 6.746678 | 1152.51 | 6.746678 | 1152.51 | 6.746678 |
| 6.75     | 1152.51 | 6.75     | 1152.51 | 6.75     | 1152.51 | 6.75     | 1152.51 | 6.75     |
| 6.756678 | 1152.51 | 6.756678 | 1152.51 | 6.756678 | 1152.51 | 6.756678 | 1152.51 | 6.756678 |
| 6.76     | 1152.51 | 6.76     | 1152.51 | 6.76     | 1152.51 | 6.76     | 1152.51 | 6.76     |
| 6.766678 | 1152.51 | 6.766678 | 1152.51 | 6.766678 | 1152.51 | 6.766678 | 1152.51 | 6.766678 |
| 6.77     | 1152.51 | 6.77     | 1152.51 | 6.77     | 1152.51 | 6.77     | 1152.51 | 6.77     |
| 6.776678 | 1152.51 | 6.776678 | 1152.51 | 6.776678 | 1152.51 | 6.776678 | 1152.51 | 6.776678 |
| 6.78     | 1152.51 | 6.78     | 1152.51 | 6.78     | 1152.51 | 6.78     | 1152.51 | 6.78     |
| 6.786678 | 1152.51 | 6.786678 | 1152.51 | 6.786678 | 1152.51 | 6.786678 | 1152.51 | 6.786678 |
| 6.79     | 1152.51 | 6.79     | 1152.51 | 6.79     | 1152.51 | 6.79     | 1152.51 | 6.79     |

|          |         |          |         |          |         |          |         |          |
|----------|---------|----------|---------|----------|---------|----------|---------|----------|
| 6.796678 | 1152.51 | 6.796678 | 1152.51 | 6.796678 | 1152.51 | 6.796678 | 1152.51 | 6.796678 |
| 6.8      | 1152.51 | 6.8      | 1152.51 | 6.8      | 1152.51 | 6.8      | 1152.51 | 6.8      |
| 6.806678 | 1152.51 | 6.806678 | 1152.51 | 6.806678 | 1152.51 | 6.806678 | 1152.51 | 6.806678 |
| 6.81     | 1152.51 | 6.81     | 1152.51 | 6.81     | 1152.51 | 6.81     | 1152.51 | 6.81     |
| 6.816678 | 1152.51 | 6.816678 | 1152.51 | 6.816678 | 1152.51 | 6.816678 | 1152.51 | 6.816678 |
| 6.82     | 1152.51 | 6.82     | 1152.51 | 6.82     | 1152.51 | 6.82     | 1152.51 | 6.82     |
| 6.826678 | 1152.51 | 6.826678 | 1152.51 | 6.826678 | 1152.51 | 6.826678 | 1152.51 | 6.826678 |
| 6.83     | 1152.51 | 6.83     | 1152.51 | 6.83     | 1152.51 | 6.83     | 1152.51 | 6.83     |
| 6.836678 | 1152.51 | 6.836678 | 1152.51 | 6.836678 | 1152.51 | 6.836678 | 1152.51 | 6.836678 |
| 6.84     | 1152.51 | 6.84     | 1152.51 | 6.84     | 1152.51 | 6.84     | 1152.51 | 6.84     |
| 6.846678 | 1152.51 | 6.846678 | 1152.51 | 6.846678 | 1152.51 | 6.846678 | 1152.51 | 6.846678 |
| 6.85     | 1152.51 | 6.85     | 1152.51 | 6.85     | 1152.51 | 6.85     | 1152.51 | 6.85     |
| 6.856678 | 1152.51 | 6.856678 | 1152.51 | 6.856678 | 1152.51 | 6.856678 | 1152.51 | 6.856678 |
| 6.86     | 1152.51 | 6.86     | 1152.51 | 6.86     | 1152.51 | 6.86     | 1152.51 | 6.86     |
| 6.866678 | 1152.51 | 6.866678 | 1152.51 | 6.866678 | 1152.51 | 6.866678 | 1152.51 | 6.866678 |
| 6.87     | 1152.51 | 6.87     | 1152.51 | 6.87     | 1152.51 | 6.87     | 1152.51 | 6.87     |
| 6.876678 | 1152.51 | 6.876678 | 1152.51 | 6.876678 | 1152.51 | 6.876678 | 1152.51 | 6.876678 |
| 6.88     | 1152.51 | 6.88     | 1152.51 | 6.88     | 1152.51 | 6.88     | 1152.51 | 6.88     |
| 6.886678 | 1152.51 | 6.886678 | 1152.51 | 6.886678 | 1152.51 | 6.886678 | 1152.51 | 6.886678 |
| 6.89     | 1152.51 | 6.89     | 1152.51 | 6.89     | 1152.51 | 6.89     | 1152.51 | 6.89     |
| 6.896678 | 1152.51 | 6.896678 | 1152.51 | 6.896678 | 1152.51 | 6.896678 | 1152.51 | 6.896678 |
| 6.9      | 1152.51 | 6.9      | 1152.51 | 6.9      | 1152.51 | 6.9      | 1152.51 | 6.9      |
| 6.906678 | 1152.51 | 6.906678 | 1152.51 | 6.906678 | 1152.51 | 6.906678 | 1152.51 | 6.906678 |
| 6.91     | 1152.51 | 6.91     | 1152.51 | 6.91     | 1152.51 | 6.91     | 1152.51 | 6.91     |
| 6.916678 | 1152.51 | 6.916678 | 1152.51 | 6.916678 | 1152.51 | 6.916678 | 1152.51 | 6.916678 |
| 6.92     | 1152.51 | 6.92     | 1152.51 | 6.92     | 1152.51 | 6.92     | 1152.51 | 6.92     |
| 6.926678 | 1152.51 | 6.926678 | 1152.51 | 6.926678 | 1152.51 | 6.926678 | 1152.51 | 6.926678 |
| 6.93     | 1152.51 | 6.93     | 1152.51 | 6.93     | 1152.51 | 6.93     | 1152.51 | 6.93     |
| 6.936678 | 1152.51 | 6.936678 | 1152.51 | 6.936678 | 1152.51 | 6.936678 | 1152.51 | 6.936678 |
| 6.94     | 1152.51 | 6.94     | 1152.51 | 6.94     | 1152.51 | 6.94     | 1152.51 | 6.94     |
| 6.946678 | 1152.51 | 6.946678 | 1152.51 | 6.946678 | 1152.51 | 6.946678 | 1152.51 | 6.946678 |
| 6.95     | 1152.51 | 6.95     | 1152.51 | 6.95     | 1152.51 | 6.95     | 1152.51 | 6.95     |
| 6.956678 | 1152.51 | 6.956678 | 1152.51 | 6.956678 | 1152.51 | 6.956678 | 1152.51 | 6.956678 |
| 6.96     | 1152.51 | 6.96     | 1152.51 | 6.96     | 1152.51 | 6.96     | 1152.51 | 6.96     |
| 6.966678 | 1152.51 | 6.966678 | 1152.51 | 6.966678 | 1152.51 | 6.966678 | 1152.51 | 6.966678 |
| 6.97     | 1152.51 | 6.97     | 1152.51 | 6.97     | 1152.51 | 6.97     | 1152.51 | 6.97     |
| 6.976678 | 1152.51 | 6.976678 | 1152.51 | 6.976678 | 1152.51 | 6.976678 | 1152.51 | 6.976678 |
| 6.98     | 1152.51 | 6.98     | 1152.51 | 6.98     | 1152.51 | 6.98     | 1152.51 | 6.98     |
| 6.986678 | 1152.51 | 6.986678 | 1152.51 | 6.986678 | 1152.51 | 6.986678 | 1152.51 | 6.986678 |
| 6.99     | 1152.51 | 6.99     | 1152.51 | 6.99     | 1152.51 | 6.99     | 1152.51 | 6.99     |
| 6.996678 | 1152.51 | 6.996678 | 1152.51 | 6.996678 | 1152.51 | 6.996678 | 1152.51 | 6.996678 |
| 7        | 1152.51 | 7        | 1152.51 | 7        | 1152.51 | 7        | 1152.51 | 7        |
| 7.006678 | 1152.51 | 7.006678 | 1152.51 | 7.006678 | 1152.51 | 7.006678 | 1152.51 | 7.006678 |
| 7.01     | 1152.51 | 7.01     | 1152.51 | 7.01     | 1152.51 | 7.01     | 1152.51 | 7.01     |
| 7.016678 | 1152.51 | 7.016678 | 1152.51 | 7.016678 | 1152.51 | 7.016678 | 1152.51 | 7.016678 |
| 7.02     | 1152.51 | 7.02     | 1152.51 | 7.02     | 1152.51 | 7.02     | 1152.51 | 7.02     |
| 7.026678 | 1152.51 | 7.026678 | 1152.51 | 7.026678 | 1152.51 | 7.026678 | 1152.51 | 7.026678 |



|          |         |          |         |          |         |          |         |          |
|----------|---------|----------|---------|----------|---------|----------|---------|----------|
| 7.03     | 1152.51 | 7.03     | 1152.51 | 7.03     | 1152.51 | 7.03     | 1152.51 | 7.03     |
| 7.036678 | 1152.51 | 7.036678 | 1152.51 | 7.036678 | 1152.51 | 7.036678 | 1152.51 | 7.036678 |
| 7.04     | 1152.51 | 7.04     | 1152.51 | 7.04     | 1152.51 | 7.04     | 1152.51 | 7.04     |
| 7.046678 | 1152.51 | 7.046678 | 1152.51 | 7.046678 | 1152.51 | 7.046678 | 1152.51 | 7.046678 |
| 7.05     | 1152.51 | 7.05     | 1152.51 | 7.05     | 1152.51 | 7.05     | 1152.51 | 7.05     |
| 7.056678 | 1152.51 | 7.056678 | 1152.51 | 7.056678 | 1152.51 | 7.056678 | 1152.51 | 7.056678 |
| 7.06     | 1152.51 | 7.06     | 1152.51 | 7.06     | 1152.51 | 7.06     | 1152.51 | 7.06     |
| 7.066678 | 1152.51 | 7.066678 | 1152.51 | 7.066678 | 1152.51 | 7.066678 | 1152.51 | 7.066678 |
| 7.07     | 1152.51 | 7.07     | 1152.51 | 7.07     | 1152.51 | 7.07     | 1152.51 | 7.07     |
| 7.076678 | 1152.51 | 7.076678 | 1152.51 | 7.076678 | 1152.51 | 7.076678 | 1152.51 | 7.076678 |
| 7.08     | 1152.51 | 7.08     | 1152.51 | 7.08     | 1152.51 | 7.08     | 1152.51 | 7.08     |
| 7.086678 | 1152.51 | 7.086678 | 1152.51 | 7.086678 | 1152.51 | 7.086678 | 1152.51 | 7.086678 |
| 7.09     | 1152.51 | 7.09     | 1152.51 | 7.09     | 1152.51 | 7.09     | 1152.51 | 7.09     |
| 7.096678 | 1152.51 | 7.096678 | 1152.51 | 7.096678 | 1152.51 | 7.096678 | 1152.51 | 7.096678 |
| 7.1      | 1152.51 | 7.1      | 1152.51 | 7.1      | 1152.51 | 7.1      | 1152.51 | 7.1      |
| 7.106678 | 1152.51 | 7.106678 | 1152.51 | 7.106678 | 1152.51 | 7.106678 | 1152.51 | 7.106678 |
| 7.11     | 1152.51 | 7.11     | 1152.51 | 7.11     | 1152.51 | 7.11     | 1152.51 | 7.11     |
| 7.116678 | 1152.51 | 7.116678 | 1152.51 | 7.116678 | 1152.51 | 7.116678 | 1152.51 | 7.116678 |
| 7.12     | 1152.51 | 7.12     | 1152.51 | 7.12     | 1152.51 | 7.12     | 1152.51 | 7.12     |
| 7.126678 | 1152.51 | 7.126678 | 1152.51 | 7.126678 | 1152.51 | 7.126678 | 1152.51 | 7.126678 |
| 7.13     | 1152.51 | 7.13     | 1152.51 | 7.13     | 1152.51 | 7.13     | 1152.51 | 7.13     |
| 7.136678 | 1152.51 | 7.136678 | 1152.51 | 7.136678 | 1152.51 | 7.136678 | 1152.51 | 7.136678 |
| 7.14     | 1152.51 | 7.14     | 1152.51 | 7.14     | 1152.51 | 7.14     | 1152.51 | 7.14     |
| 7.146678 | 1152.51 | 7.146678 | 1152.51 | 7.146678 | 1152.51 | 7.146678 | 1152.51 | 7.146678 |
| 7.15     | 1152.51 | 7.15     | 1152.51 | 7.15     | 1152.51 | 7.15     | 1152.51 | 7.15     |
| 7.156678 | 1152.51 | 7.156678 | 1152.51 | 7.156678 | 1152.51 | 7.156678 | 1152.51 | 7.156678 |
| 7.16     | 1152.51 | 7.16     | 1152.51 | 7.16     | 1152.51 | 7.16     | 1152.51 | 7.16     |
| 7.166678 | 1152.51 | 7.166678 | 1152.51 | 7.166678 | 1152.51 | 7.166678 | 1152.51 | 7.166678 |
| 7.17     | 1152.51 | 7.17     | 1152.51 | 7.17     | 1152.51 | 7.17     | 1152.51 | 7.17     |
| 7.176678 | 1152.51 | 7.176678 | 1152.51 | 7.176678 | 1152.51 | 7.176678 | 1152.51 | 7.176678 |
| 7.18     | 1152.51 | 7.18     | 1152.51 | 7.18     | 1152.51 | 7.18     | 1152.51 | 7.18     |
| 7.186678 | 1152.51 | 7.186678 | 1152.51 | 7.186678 | 1152.51 | 7.186678 | 1152.51 | 7.186678 |
| 7.19     | 1152.51 | 7.19     | 1152.51 | 7.19     | 1152.51 | 7.19     | 1152.51 | 7.19     |
| 7.196678 | 1152.51 | 7.196678 | 1152.51 | 7.196678 | 1152.51 | 7.196678 | 1152.51 | 7.196678 |
| 7.2      | 1152.51 | 7.2      | 1152.51 | 7.2      | 1152.51 | 7.2      | 1152.51 | 7.2      |
| 7.206678 | 1152.51 | 7.206678 | 1152.51 | 7.206678 | 1152.51 | 7.206678 | 1152.51 | 7.206678 |
| 7.21     | 1152.51 | 7.21     | 1152.51 | 7.21     | 1152.51 | 7.21     | 1152.51 | 7.21     |
| 7.216678 | 1152.51 | 7.216678 | 1152.51 | 7.216678 | 1152.51 | 7.216678 | 1152.51 | 7.216678 |
| 7.22     | 1152.51 | 7.22     | 1152    |          |         |          |         |          |

|          |         |            |         |          |         |          |         |          |
|----------|---------|------------|---------|----------|---------|----------|---------|----------|
| 7.266678 | 1152.51 | 7.266678   | 1152.51 | 7.266678 | 1152.51 | 7.266678 | 1152.51 | 7.266678 |
| 7.27     | 1152.51 | 7.27       | 1152.51 | 7.27     | 1152.51 | 7.27     | 1152.51 | 7.27     |
| 7.276678 | 1152.51 | 7.276678   | 1152.51 | 7.276678 | 1152.51 | 7.276678 | 1152.51 | 7.276678 |
| 7.28     | 1152.51 | 7.28       | 1152.51 | 7.28     | 1152.51 | 7.28     | 1152.51 | 7.28     |
| 7.286678 | 1152.51 | 7.286678   | 1152.51 | 7.286678 | 1152.51 | 7.286678 | 1152.51 | 7.286678 |
| 7.29     | 1152.51 | 7.29       | 1152.51 | 7.29     | 1152.51 | 7.29     | 1152.51 | 7.29     |
| 7.296678 | 1152.51 | 7.296678   | 1152.51 | 7.296678 | 1152.51 | 7.296678 | 1152.51 | 7.296678 |
| 7.3      | 1152.51 | 7.3        | 1152.51 | 7.3      | 1152.51 | 7.3      | 1152.51 | 7.3      |
| 7.306678 | 1152.51 | 7.306678   | 1152.51 | 7.306678 | 1152.51 | 7.306678 | 1152.51 | 7.306678 |
| 7.31     | 1152.51 | 7.31       | 1152.51 | 7.31     | 1152.51 | 7.31     | 1152.51 | 7.31     |
| 7.316678 | 1152.51 | 7.316678   | 1152.51 | 7.316678 | 1152.51 | 7.316678 | 1152.51 | 7.316678 |
| 7.32     | 1152.51 | 7.32       | 1152.51 | 7.32     | 1152.51 | 7.32     | 1152.51 | 7.32     |
| 7.326678 | 1152.51 | 7.326678   | 1152.51 | 7.326678 | 1152.51 | 7.326678 | 1152.51 | 7.326678 |
| 7.33     | 1152.51 | 7.33       | 1152.51 | 7.33     | 1152.51 | 7.33     | 1152.51 | 7.33     |
| 7.336678 | 1152.51 | 7.336678   | 1152.51 | 7.336678 | 1152.51 | 7.336678 | 1152.51 | 7.336678 |
| 7.34     | 1152.51 | 7.34       | 1152.51 | 7.34     | 1152.51 | 7.34     | 1152.51 | 7.34     |
| 7.346678 | 1152.51 | 7.346678   | 1152.51 | 7.346678 | 1152.51 | 7.346678 | 1152.51 | 7.346678 |
| 7.35     | 1152.51 | 7.35       | 1152.51 | 7.35     | 1152.51 | 7.35     | 1152.51 | 7.35     |
| 7.356678 | 1152.51 | 7.356678   | 1152.51 | 7.356678 | 1152.51 | 7.356678 | 1152.51 | 7.356678 |
| 7.36     | 1152.51 | 7.36       | 1152.51 | 7.36     | 1152.51 | 7.36     | 1152.51 | 7.36     |
| 7.366678 | 1152.51 | 7.366678   | 1152.51 | 7.366678 | 1152.51 | 7.366678 | 1152.51 | 7.366678 |
| 7.37     | 1152.51 | 7.37       | 1152.51 | 7.37     | 1152.51 | 7.37     | 1152.51 | 7.37     |
| 7.376678 | 1152.51 | 7.376678   | 1152.51 | 7.376678 | 1152.51 | 7.376678 | 1152.51 | 7.376678 |
| 7.38     | 1152.51 | 7.38       | 1152.51 | 7.38     | 1152.51 | 7.38     | 1152.51 | 7.38     |
| 7.386678 | 1152.51 | 7.386678   | 1152.51 | 7.386678 | 1152.51 | 7.386678 | 1152.51 | 7.386678 |
| 7.39     | 1152.51 | 7.39       | 1152.51 | 7.39     | 1152.51 | 7.39     | 1152.51 | 7.39     |
| 7.396678 | 1152.51 | 7.396678   | 1152.51 | 7.396678 | 1152.51 | 7.396678 | 1152.51 | 7.396678 |
| 7.4      | 1152.51 | 7.4        | 1152.51 | 7.4      | 1152.51 | 7.4      | 1152.51 | 7.4      |
| 7.406678 | 1152.51 | 7.406678   | 1152.51 | 7.406678 | 1152.51 | 7.406678 | 1152.51 | 7.406678 |
| 7.41     | 1152.51 | 7.41       | 1152.51 | 7.41     | 1152.51 | 7.41     | 1152.51 | 7.41     |
| 7.416678 | 1152.51 | 7.416678   | 1152.51 | 7.416678 | 1152.51 | 7.416678 | 1152.51 | 7.416678 |
| 7.42     | 1152.51 | 7.42       | 1152.51 | 7.42     | 1152.51 | 7.42     | 1152.51 | 7.42     |
| 7.426678 | 1152.51 | 7.426678   | 1152.51 | 7.426678 | 1152.51 | 7.426678 | 1152.51 | 7.426678 |
| 7.43     | 1152.51 | 7.43       | 1152.51 | 7.43     | 1152.51 | 7.43     | 1152.51 | 7.43     |
| 7.436678 | 1152.51 | 7.436678   | 1152.51 | 7.436678 | 1152.51 | 7.436678 | 1152.51 | 7.436678 |
| 7.44     | 1152.51 | 7.44       | 1152.51 | 7.44     | 1152.51 | 7.44     | 1152.51 | 7.44     |
| 7.446678 | 1152.51 | 7.446678   | 1152.51 | 7.446678 | 1152.51 | 7.446678 | 1152.51 | 7.446678 |
| 7.45     | 1152.51 | 7.45       | 1152.51 | 7.45     | 1152.51 | 7.45     | 1152.51 | 7.45     |
| 7.456678 | 1152.51 | 7.456678</ |         |          |         |          |         |          |

|          |         |          |         |          |         |          |         |          |
|----------|---------|----------|---------|----------|---------|----------|---------|----------|
| 7.5      | 1152.51 | 7.5      | 1152.51 | 7.5      | 1152.51 | 7.5      | 1152.51 | 7.5      |
| 7.506678 | 1152.51 | 7.506678 | 1152.51 | 7.506678 | 1152.51 | 7.506678 | 1152.51 | 7.506678 |
| 7.51     | 1152.51 | 7.51     | 1152.51 | 7.51     | 1152.51 | 7.51     | 1152.51 | 7.51     |
| 7.516678 | 1152.51 | 7.516678 | 1152.51 | 7.516678 | 1152.51 | 7.516678 | 1152.51 | 7.516678 |
| 7.52     | 1152.51 | 7.52     | 1152.51 | 7.52     | 1152.51 | 7.52     | 1152.51 | 7.52     |
| 7.526678 | 1152.51 | 7.526678 | 1152.51 | 7.526678 | 1152.51 | 7.526678 | 1152.51 | 7.526678 |
| 7.53     | 1152.51 | 7.53     | 1152.51 | 7.53     | 1152.51 | 7.53     | 1152.51 | 7.53     |
| 7.536678 | 1152.51 | 7.536678 | 1152.51 | 7.536678 | 1152.51 | 7.536678 | 1152.51 | 7.536678 |
| 7.54     | 1152.51 | 7.54     | 1152.51 | 7.54     | 1152.51 | 7.54     | 1152.51 | 7.54     |
| 7.546678 | 1152.51 | 7.546678 | 1152.51 | 7.546678 | 1152.51 | 7.546678 | 1152.51 | 7.546678 |
| 7.55     | 1152.51 | 7.55     | 1152.51 | 7.55     | 1152.51 | 7.55     | 1152.51 | 7.55     |
| 7.556678 | 1152.51 | 7.556678 | 1152.51 | 7.556678 | 1152.51 | 7.556678 | 1152.51 | 7.556678 |
| 7.56     | 1152.51 | 7.56     | 1152.51 | 7.56     | 1152.51 | 7.56     | 1152.51 | 7.56     |
| 7.566678 | 1152.51 | 7.566678 | 1152.51 | 7.566678 | 1152.51 | 7.566678 | 1152.51 | 7.566678 |
| 7.57     | 1152.51 | 7.57     | 1152.51 | 7.57     | 1152.51 | 7.57     | 1152.51 | 7.57     |
| 7.576678 | 1152.51 | 7.576678 | 1152.51 | 7.576678 | 1152.51 | 7.576678 | 1152.51 | 7.576678 |
| 7.58     | 1152.51 | 7.58     | 1152.51 | 7.58     | 1152.51 | 7.58     | 1152.51 | 7.58     |
| 7.586678 | 1152.51 | 7.586678 | 1152.51 | 7.586678 | 1152.51 | 7.586678 | 1152.51 | 7.586678 |
| 7.59     | 1152.51 | 7.59     | 1152.51 | 7.59     | 1152.51 | 7.59     | 1152.51 | 7.59     |
| 7.596678 | 1152.51 | 7.596678 | 1152.51 | 7.596678 | 1152.51 | 7.596678 | 1152.51 | 7.596678 |
| 7.6      | 1152.51 | 7.6      | 1152.51 | 7.6      | 1152.51 | 7.6      | 1152.51 | 7.6      |
| 7.606678 | 1152.51 | 7.606678 | 1152.51 | 7.606678 | 1152.51 | 7.606678 | 1152.51 | 7.606678 |
| 7.61     | 1152.51 | 7.61     | 1152.51 | 7.61     | 1152.51 | 7.61     | 1152.51 | 7.61     |
| 7.616678 | 1152.51 | 7.616678 | 1152.51 | 7.616678 | 1152.51 | 7.616678 | 1152.51 | 7.616678 |
| 7.62     | 1152.51 | 7.62     | 1152.51 | 7.62     | 1152.51 | 7.62     | 1152.51 | 7.62     |
| 7.626678 | 1152.51 | 7.626678 | 1152.51 | 7.626678 | 1152.51 | 7.626678 | 1152.51 | 7.626678 |
| 7.63     | 1152.51 | 7.63     | 1152.51 | 7.63     | 1152.51 | 7.63     | 1152.51 | 7.63     |
| 7.636678 | 1152.51 | 7.636678 | 1152.51 | 7.636678 | 1152.51 | 7.636678 | 1152.51 | 7.636678 |
| 7.64     | 1152.51 | 7.64     | 1152.51 | 7.64     | 1152.51 | 7.64     | 1152.51 | 7.64     |
| 7.646678 | 1152.51 | 7.646678 | 1152.51 | 7.646678 | 1152.51 | 7.646678 | 1152.51 | 7.646678 |
| 7.65     | 1152.51 | 7.65     | 1152.51 | 7.65     | 1152.51 | 7.65     | 1152.51 | 7.65     |
| 7.656678 | 1152.51 | 7.656678 | 1152.51 | 7.656678 | 1152.51 | 7.656678 | 1152.51 | 7.656678 |
| 7.66     | 1152.51 | 7.66     | 1152.51 | 7.66     | 1152.51 | 7.66     | 1152.51 | 7.66     |
| 7.666678 | 1152.51 | 7.666678 | 1152.51 | 7.666678 | 1152.51 | 7.666678 | 1152.51 | 7.666678 |
| 7.67     | 1152.51 | 7.67     | 1152.51 | 7.67     | 1152.51 | 7.67     | 1152.51 | 7.67     |
| 7.676678 | 1152.51 | 7.676678 | 1152.51 | 7.676678 | 1152.51 | 7.676678 | 1152.51 | 7.676678 |
| 7.68     | 1152.51 | 7.68     | 1152.51 | 7.68     | 1152.51 | 7.68     | 1152.51 | 7.68     |
| 7.686678 | 1152.51 | 7.686678 | 1152.51 | 7.686678 | 1152.51 | 7.686678 | 1152.51 | 7.686678 |
| 7.69     | 1152.51 | 7.69     | 1152.51 | 7.69     | 1152.51 | 7.69     | 1152.51 | 7.69     |
| 7.696678 | 1152.51 | 7.696678 | 1152.51 | 7.696678 | 1152.51 | 7.696678 | 1152.51 | 7.696678 |
| 7.7      | 1152.51 | 7.7      | 1152.51 | 7.7      | 1152.51 | 7.7      | 1152.51 | 7.7      |
| 7.706678 | 1152.51 | 7.706678 | 1152.51 | 7.706678 | 1152.51 | 7.706678 | 1152.51 | 7.706678 |
| 7.71     | 1152.51 | 7.71     | 1152.51 | 7.71     | 1152.51 | 7.71     | 1152.51 | 7.71     |
| 7.716678 | 1152.51 | 7.716678 | 1152.51 | 7.716678 | 1152.51 | 7.716678 | 1152.51 | 7.716678 |
| 7.72     | 1152.51 | 7.72     | 1152.51 | 7.72     | 1152.51 | 7.72     | 1152.51 | 7.72     |
| 7.726678 | 1152.51 | 7.726678 | 1152.51 | 7.726678 | 1152.51 | 7.726678 | 1152.51 | 7.726678 |
| 7.73     | 1152.51 | 7.73     | 1152.51 | 7.73     | 1152.51 | 7.73     | 1152.51 | 7.73     |

|          |         |            |         |          |         |          |         |          |
|----------|---------|------------|---------|----------|---------|----------|---------|----------|
| 7.736678 | 1152.51 | 7.736678   | 1152.51 | 7.736678 | 1152.51 | 7.736678 | 1152.51 | 7.736678 |
| 7.74     | 1152.51 | 7.74       | 1152.51 | 7.74     | 1152.51 | 7.74     | 1152.51 | 7.74     |
| 7.746678 | 1152.51 | 7.746678   | 1152.51 | 7.746678 | 1152.51 | 7.746678 | 1152.51 | 7.746678 |
| 7.75     | 1152.51 | 7.75       | 1152.51 | 7.75     | 1152.51 | 7.75     | 1152.51 | 7.75     |
| 7.756678 | 1152.51 | 7.756678   | 1152.51 | 7.756678 | 1152.51 | 7.756678 | 1152.51 | 7.756678 |
| 7.76     | 1152.51 | 7.76       | 1152.51 | 7.76     | 1152.51 | 7.76     | 1152.51 | 7.76     |
| 7.766678 | 1152.51 | 7.766678   | 1152.51 | 7.766678 | 1152.51 | 7.766678 | 1152.51 | 7.766678 |
| 7.77     | 1152.51 | 7.77       | 1152.51 | 7.77     | 1152.51 | 7.77     | 1152.51 | 7.77     |
| 7.776678 | 1152.51 | 7.776678   | 1152.51 | 7.776678 | 1152.51 | 7.776678 | 1152.51 | 7.776678 |
| 7.78     | 1152.51 | 7.78       | 1152.51 | 7.78     | 1152.51 | 7.78     | 1152.51 | 7.78     |
| 7.786678 | 1152.51 | 7.786678   | 1152.51 | 7.786678 | 1152.51 | 7.786678 | 1152.51 | 7.786678 |
| 7.79     | 1152.51 | 7.79       | 1152.51 | 7.79     | 1152.51 | 7.79     | 1152.51 | 7.79     |
| 7.796678 | 1152.51 | 7.796678   | 1152.51 | 7.796678 | 1152.51 | 7.796678 | 1152.51 | 7.796678 |
| 7.8      | 1152.51 | 7.8        | 1152.51 | 7.8      | 1152.51 | 7.8      | 1152.51 | 7.8      |
| 7.806678 | 1152.51 | 7.806678   | 1152.51 | 7.806678 | 1152.51 | 7.806678 | 1152.51 | 7.806678 |
| 7.81     | 1152.51 | 7.81       | 1152.51 | 7.81     | 1152.51 | 7.81     | 1152.51 | 7.81     |
| 7.816678 | 1152.51 | 7.816678   | 1152.51 | 7.816678 | 1152.51 | 7.816678 | 1152.51 | 7.816678 |
| 7.82     | 1152.51 | 7.82       | 1152.51 | 7.82     | 1152.51 | 7.82     | 1152.51 | 7.82     |
| 7.826678 | 1152.51 | 7.826678   | 1152.51 | 7.826678 | 1152.51 | 7.826678 | 1152.51 | 7.826678 |
| 7.83     | 1152.51 | 7.83       | 1152.51 | 7.83     | 1152.51 | 7.83     | 1152.51 | 7.83     |
| 7.836678 | 1152.51 | 7.836678   | 1152.51 | 7.836678 | 1152.51 | 7.836678 | 1152.51 | 7.836678 |
| 7.84     | 1152.51 | 7.84       | 1152.51 | 7.84     | 1152.51 | 7.84     | 1152.51 | 7.84     |
| 7.846678 | 1152.51 | 7.846678   | 1152.51 | 7.846678 | 1152.51 | 7.846678 | 1152.51 | 7.846678 |
| 7.85     | 1152.51 | 7.85       | 1152.51 | 7.85     | 1152.51 | 7.85     | 1152.51 | 7.85     |
| 7.856678 | 1152.51 | 7.856678   | 1152.51 | 7.856678 | 1152.51 | 7.856678 | 1152.51 | 7.856678 |
| 7.86     | 1152.51 | 7.86       | 1152.51 | 7.86     | 1152.51 | 7.86     | 1152.51 | 7.86     |
| 7.866678 | 1152.51 | 7.866678   | 1152.51 | 7.866678 | 1152.51 | 7.866678 | 1152.51 | 7.866678 |
| 7.87     | 1152.51 | 7.87       | 1152.51 | 7.87     | 1152.51 | 7.87     | 1152.51 | 7.87     |
| 7.876678 | 1152.51 | 7.876678   | 1152.51 | 7.876678 | 1152.51 | 7.876678 | 1152.51 | 7.876678 |
| 7.88     | 1152.51 | 7.88       | 1152.51 | 7.88     | 1152.51 | 7.88     | 1152.51 | 7.88     |
| 7.886678 | 1152.51 | 7.886678   | 1152.51 | 7.886678 | 1152.51 | 7.886678 | 1152.51 | 7.886678 |
| 7.89     | 1152.51 | 7.89       | 1152.51 | 7.89     | 1152.51 | 7.89     | 1152.51 | 7.89     |
| 7.896678 | 1152.51 | 7.896678   | 1152.51 | 7.896678 | 1152.51 | 7.896678 | 1152.51 | 7.896678 |
| 7.9      | 1152.51 | 7.9        | 1152.51 | 7.9      | 1152.51 | 7.9      | 1152.51 | 7.9      |
| 7.906678 | 1152.51 | 7.906678   | 1152.51 | 7.906678 | 1152.51 | 7.906678 | 1152.51 | 7.906678 |
| 7.91     | 1152.51 | 7.91       | 1152.51 | 7.91     | 1152.51 | 7.91     | 1152.51 | 7.91     |
| 7.916678 | 1152.51 | 7.916678   | 1152.51 | 7.916678 | 1152.51 | 7.916678 | 1152.51 | 7.916678 |
| 7.92     | 1152.51 | 7.92       | 1152.51 | 7.92     | 1152.51 | 7.92     | 1152.51 | 7.92     |
| 7.926678 | 1152.51 | 7.926678</ |         |          |         |          |         |          |

|          |         |          |         |          |         |          |         |          |
|----------|---------|----------|---------|----------|---------|----------|---------|----------|
| 7.97     | 1152.51 | 7.97     | 1152.51 | 7.97     | 1152.51 | 7.97     | 1152.51 | 7.97     |
| 7.976678 | 1152.51 | 7.976678 | 1152.51 | 7.976678 | 1152.51 | 7.976678 | 1152.51 | 7.976678 |
| 7.98     | 1152.51 | 7.98     | 1152.51 | 7.98     | 1152.51 | 7.98     | 1152.51 | 7.98     |
| 7.986678 | 1152.51 | 7.986678 | 1152.51 | 7.986678 | 1152.51 | 7.986678 | 1152.51 | 7.986678 |
| 7.99     | 1152.51 | 7.99     | 1152.51 | 7.99     | 1152.51 | 7.99     | 1152.51 | 7.99     |
| 7.996678 | 1152.51 | 7.996678 | 1152.51 | 7.996678 | 1152.51 | 7.996678 | 1152.51 | 7.996678 |
| 8        | 1152.51 | 8        | 1152.51 | 8        | 1152.51 | 8        | 1152.51 | 8        |
| 8.006678 | 1152.51 | 8.006678 | 1152.51 | 8.006678 | 1152.51 | 8.006678 | 1152.51 | 8.006678 |
| 8.01     | 1152.51 | 8.01     | 1152.51 | 8.01     | 1152.51 | 8.01     | 1152.51 | 8.01     |
| 8.016678 | 1152.51 | 8.016678 | 1152.51 | 8.016678 | 1152.51 | 8.016678 | 1152.51 | 8.016678 |
| 8.02     | 1152.51 | 8.02     | 1152.51 | 8.02     | 1152.51 | 8.02     | 1152.51 | 8.02     |
| 8.026678 | 1152.51 | 8.026678 | 1152.51 | 8.026678 | 1152.51 | 8.026678 | 1152.51 | 8.026678 |
| 8.03     | 1152.51 | 8.03     | 1152.51 | 8.03     | 1152.51 | 8.03     | 1152.51 | 8.03     |
| 8.036678 | 1152.51 | 8.036678 | 1152.51 | 8.036678 | 1152.51 | 8.036678 | 1152.51 | 8.036678 |
| 8.04     | 1152.51 | 8.04     | 1152.51 | 8.04     | 1152.51 | 8.04     | 1152.51 | 8.04     |
| 8.046678 | 1152.51 | 8.046678 | 1152.51 | 8.046678 | 1152.51 | 8.046678 | 1152.51 | 8.046678 |
| 8.05     | 1152.51 | 8.05     | 1152.51 | 8.05     | 1152.51 | 8.05     | 1152.51 | 8.05     |
| 8.056678 | 1152.51 | 8.056678 | 1152.51 | 8.056678 | 1152.51 | 8.056678 | 1152.51 | 8.056678 |
| 8.06     | 1152.51 | 8.06     | 1152.51 | 8.06     | 1152.51 | 8.06     | 1152.51 | 8.06     |
| 8.066678 | 1152.51 | 8.066678 | 1152.51 | 8.066678 | 1152.51 | 8.066678 | 1152.51 | 8.066678 |
| 8.07     | 1152.51 | 8.07     | 1152.51 | 8.07     | 1152.51 | 8.07     | 1152.51 | 8.07     |
| 8.076678 | 1152.51 | 8.076678 | 1152.51 | 8.076678 | 1152.51 | 8.076678 | 1152.51 | 8.076678 |
| 8.08     | 1152.51 | 8.08     | 1152.51 | 8.08     | 1152.51 | 8.08     | 1152.51 | 8.08     |
| 8.086678 | 1152.51 | 8.086678 | 1152.51 | 8.086678 | 1152.51 | 8.086678 | 1152.51 | 8.086678 |
| 8.09     | 1152.51 | 8.09     | 1152.51 | 8.09     | 1152.51 | 8.09     | 1152.51 | 8.09     |
| 8.096678 | 1152.51 | 8.096678 | 1152.51 | 8.096678 | 1152.51 | 8.096678 | 1152.51 | 8.096678 |
| 8.1      | 1152.51 | 8.1      | 1152.51 | 8.1      | 1152.51 | 8.1      | 1152.51 | 8.1      |
| 8.106678 | 1152.51 | 8.106678 | 1152.51 | 8.106678 | 1152.51 | 8.106678 | 1152.51 | 8.106678 |
| 8.11     | 1152.51 | 8.11     | 1152.51 | 8.11     | 1152.51 | 8.11     | 1152.51 | 8.11     |
| 8.116678 | 1152.51 | 8.116678 | 1152.51 | 8.116678 | 1152.51 | 8.116678 | 1152.51 | 8.116678 |
| 8.12     | 1152.51 | 8.12     | 1152.51 | 8.12     | 1152.51 | 8.12     | 1152.51 | 8.12     |
| 8.126678 | 1152.51 | 8.126678 | 1152.51 | 8.126678 | 1152.51 | 8.126678 | 1152.51 | 8.126678 |
| 8.13     | 1152.51 | 8.13     | 1152.51 | 8.13     | 1152.51 | 8.13     | 1152.51 | 8.13     |
| 8.136678 | 1152.51 | 8.136678 | 1152.51 | 8.136678 | 1152.51 | 8.136678 | 1152.51 | 8.136678 |
| 8.14     | 1152.51 | 8.14     | 1152.51 | 8.14     | 1152.51 | 8.14     | 1152.51 | 8.14     |
| 8.146678 | 1152.51 | 8.146678 | 1152.51 | 8.146678 | 1152.51 | 8.146678 | 1152.51 | 8.146678 |
| 8.15     | 1152.51 | 8.15     | 1152.51 | 8.15     | 1152.51 | 8.15     | 1152.51 | 8.15     |
| 8.156678 | 1152.51 | 8.156678 | 1152.51 | 8.156678 | 1152.51 | 8.156678 | 1152.51 | 8.156678 |
| 8.16     | 1152.51 | 8.16     | 1152.51 | 8.16     | 1152.51 | 8.16     | 1152.51 | 8.16     |
| 8.166678 | 1152.51 | 8.166678 | 1152.51 | 8.166678 | 1152.51 | 8.166678 | 1152.51 | 8.166678 |
| 8.17     | 1152.51 | 8.17     | 1152.51 | 8.17     | 1152.51 | 8.17     | 1152.51 | 8.17     |
| 8.176678 | 1152.51 | 8.176678 | 1152.51 | 8.176678 | 1152.51 | 8.176678 | 1152.51 | 8.176678 |
| 8.18     | 1152.51 | 8.18     | 1152.51 | 8.18     | 1152.51 | 8.18     | 1152.51 | 8.18     |
| 8.186678 | 1152.51 | 8.186678 | 1152.51 | 8.186678 | 1152.51 | 8.186678 | 1152.51 | 8.186678 |
| 8.19     | 1152.51 | 8.19     | 1152.51 | 8.19     | 1152.51 | 8.19     | 1152.51 | 8.19     |
| 8.196678 | 1152.51 | 8.196678 | 1152.51 | 8.196678 | 1152.51 | 8.196678 | 1152.51 | 8.196678 |
| 8.2      | 1152.51 | 8.2      | 1152.51 | 8.2      | 1152.51 | 8.2      | 1152.51 | 8.2      |

[illegible]

|          |         |          |         |          |         |          |         |          |
|----------|---------|----------|---------|----------|---------|----------|---------|----------|
| 8.44     | 1152.51 | 8.44     | 1152.51 | 8.44     | 1152.51 | 8.44     | 1152.51 | 8.44     |
| 8.446678 | 1152.51 | 8.446678 | 1152.51 | 8.446678 | 1152.51 | 8.446678 | 1152.51 | 8.446678 |
| 8.45     | 1152.51 | 8.45     | 1152.51 | 8.45     | 1152.51 | 8.45     | 1152.51 | 8.45     |
| 8.456678 | 1152.51 | 8.456678 | 1152.51 | 8.456678 | 1152.51 | 8.456678 | 1152.51 | 8.456678 |
| 8.46     | 1152.51 | 8.46     | 1152.51 | 8.46     | 1152.51 | 8.46     | 1152.51 | 8.46     |
| 8.466678 | 1152.51 | 8.466678 | 1152.51 | 8.466678 | 1152.51 | 8.466678 | 1152.51 | 8.466678 |
| 8.47     | 1152.51 | 8.47     | 1152.51 | 8.47     | 1152.51 | 8.47     | 1152.51 | 8.47     |
| 8.476678 | 1152.51 | 8.476678 | 1152.51 | 8.476678 | 1152.51 | 8.476678 | 1152.51 | 8.476678 |
| 8.48     | 1152.51 | 8.48     | 1152.51 | 8.48     | 1152.51 | 8.48     | 1152.51 | 8.48     |
| 8.486678 | 1152.51 | 8.486678 | 1152.51 | 8.486678 | 1152.51 | 8.486678 | 1152.51 | 8.486678 |
| 8.49     | 1152.51 | 8.49     | 1152.51 | 8.49     | 1152.51 | 8.49     | 1152.51 | 8.49     |
| 8.496678 | 1152.51 | 8.496678 | 1152.51 | 8.496678 | 1152.51 | 8.496678 | 1152.51 | 8.496678 |
| 8.5      | 1152.51 | 8.5      | 1152.51 | 8.5      | 1152.51 | 8.5      | 1152.51 | 8.5      |
| 8.506678 | 1152.51 | 8.506678 | 1152.51 | 8.506678 | 1152.51 | 8.506678 | 1152.51 | 8.506678 |
| 8.51     | 1152.51 | 8.51     | 1152.51 | 8.51     | 1152.51 | 8.51     | 1152.51 | 8.51     |
| 8.516678 | 1152.51 | 8.516678 | 1152.51 | 8.516678 | 1152.51 | 8.516678 | 1152.51 | 8.516678 |
| 8.52     | 1152.51 | 8.52     | 1152.51 | 8.52     | 1152.51 | 8.52     | 1152.51 | 8.52     |
| 8.526678 | 1152.51 | 8.526678 | 1152.51 | 8.526678 | 1152.51 | 8.526678 | 1152.51 | 8.526678 |
| 8.53     | 1152.51 | 8.53     | 1152.51 | 8.53     | 1152.51 | 8.53     | 1152.51 | 8.53     |
| 8.536678 | 1152.51 | 8.536678 | 1152.51 | 8.536678 | 1152.51 | 8.536678 | 1152.51 | 8.536678 |
| 8.54     | 1152.51 | 8.54     | 1152.51 | 8.54     | 1152.51 | 8.54     | 1152.51 | 8.54     |
| 8.546678 | 1152.51 | 8.546678 | 1152.51 | 8.546678 | 1152.51 | 8.546678 | 1152.51 | 8.546678 |
| 8.55     | 1152.51 | 8.55     | 1152.51 | 8.55     | 1152.51 | 8.55     | 1152.51 | 8.55     |
| 8.556678 | 1152.51 | 8.556678 | 1152.51 | 8.556678 | 1152.51 | 8.556678 | 1152.51 | 8.556678 |
| 8.56     | 1152.51 | 8.56     | 1152.51 | 8.56     | 1152.51 | 8.56     | 1152.51 | 8.56     |
| 8.566678 | 1152.51 | 8.566678 | 1152.51 | 8.566678 | 1152.51 | 8.566678 | 1152.51 | 8.566678 |
| 8.57     | 1152.51 | 8.57     | 1152.51 | 8.57     | 1152.51 | 8.57     | 1152.51 | 8.57     |
| 8.576678 | 1152.51 | 8.576678 | 1152.51 | 8.576678 | 1152.51 | 8.576678 | 1152.51 | 8.576678 |
| 8.58     | 1152.51 | 8.58     | 1152.51 | 8.58     | 1152.51 | 8.58     | 1152.51 | 8.58     |
| 8.586678 | 1152.51 | 8.586678 | 1152.51 | 8.586678 | 1152.51 | 8.586678 | 1152.51 | 8.586678 |
| 8.59     | 1152.51 | 8.59     | 1152.51 | 8.59     | 1152.51 | 8.59     | 1152.51 | 8.59     |
| 8.596678 | 1152.51 | 8.596678 | 1152.51 | 8.596678 | 1152.51 | 8.596678 | 1152.51 | 8.596678 |
| 8.6      | 1152.51 | 8.6      | 1152.51 | 8.6      | 1152.51 | 8.6      | 1152.51 | 8.6      |
| 8.606678 | 1152.51 | 8.606678 | 1152.51 | 8.606678 | 1152.51 | 8.606678 | 1152.51 | 8.606678 |
| 8.61     | 1152.51 | 8.61     | 1152.51 | 8.61     | 1152.51 | 8.61     | 1152.51 | 8.61     |
| 8.616678 | 1152.51 | 8.616678 | 1152.51 | 8.616678 | 1152.51 | 8.616678 | 1152.51 | 8.616678 |
| 8.62     | 1152.51 | 8.62     | 1152.51 | 8.62     | 1152.51 | 8.62     | 1152.51 | 8.62     |
| 8.626678 | 1152.51 | 8.626678 | 1152.51 | 8.626678 | 1152.51 | 8.626678 | 1152.51 | 8.626678 |
| 8.63     | 1152.51 | 8.63     | 1152    |          |         |          |         |          |

|          |         |            |         |          |         |          |         |          |
|----------|---------|------------|---------|----------|---------|----------|---------|----------|
| 8.676678 | 1152.51 | 8.676678   | 1152.51 | 8.676678 | 1152.51 | 8.676678 | 1152.51 | 8.676678 |
| 8.68     | 1152.51 | 8.68       | 1152.51 | 8.68     | 1152.51 | 8.68     | 1152.51 | 8.68     |
| 8.686678 | 1152.51 | 8.686678   | 1152.51 | 8.686678 | 1152.51 | 8.686678 | 1152.51 | 8.686678 |
| 8.69     | 1152.51 | 8.69       | 1152.51 | 8.69     | 1152.51 | 8.69     | 1152.51 | 8.69     |
| 8.696678 | 1152.51 | 8.696678   | 1152.51 | 8.696678 | 1152.51 | 8.696678 | 1152.51 | 8.696678 |
| 8.7      | 1152.51 | 8.7        | 1152.51 | 8.7      | 1152.51 | 8.7      | 1152.51 | 8.7      |
| 8.706678 | 1152.51 | 8.706678   | 1152.51 | 8.706678 | 1152.51 | 8.706678 | 1152.51 | 8.706678 |
| 8.71     | 1152.51 | 8.71       | 1152.51 | 8.71     | 1152.51 | 8.71     | 1152.51 | 8.71     |
| 8.716678 | 1152.51 | 8.716678   | 1152.51 | 8.716678 | 1152.51 | 8.716678 | 1152.51 | 8.716678 |
| 8.72     | 1152.51 | 8.72       | 1152.51 | 8.72     | 1152.51 | 8.72     | 1152.51 | 8.72     |
| 8.726678 | 1152.51 | 8.726678   | 1152.51 | 8.726678 | 1152.51 | 8.726678 | 1152.51 | 8.726678 |
| 8.73     | 1152.51 | 8.73       | 1152.51 | 8.73     | 1152.51 | 8.73     | 1152.51 | 8.73     |
| 8.736678 | 1152.51 | 8.736678   | 1152.51 | 8.736678 | 1152.51 | 8.736678 | 1152.51 | 8.736678 |
| 8.74     | 1152.51 | 8.74       | 1152.51 | 8.74     | 1152.51 | 8.74     | 1152.51 | 8.74     |
| 8.746678 | 1152.51 | 8.746678   | 1152.51 | 8.746678 | 1152.51 | 8.746678 | 1152.51 | 8.746678 |
| 8.75     | 1152.51 | 8.75       | 1152.51 | 8.75     | 1152.51 | 8.75     | 1152.51 | 8.75     |
| 8.756678 | 1152.51 | 8.756678   | 1152.51 | 8.756678 | 1152.51 | 8.756678 | 1152.51 | 8.756678 |
| 8.76     | 1152.51 | 8.76       | 1152.51 | 8.76     | 1152.51 | 8.76     | 1152.51 | 8.76     |
| 8.766678 | 1152.51 | 8.766678   | 1152.51 | 8.766678 | 1152.51 | 8.766678 | 1152.51 | 8.766678 |
| 8.77     | 1152.51 | 8.77       | 1152.51 | 8.77     | 1152.51 | 8.77     | 1152.51 | 8.77     |
| 8.776678 | 1152.51 | 8.776678   | 1152.51 | 8.776678 | 1152.51 | 8.776678 | 1152.51 | 8.776678 |
| 8.78     | 1152.51 | 8.78       | 1152.51 | 8.78     | 1152.51 | 8.78     | 1152.51 | 8.78     |
| 8.786678 | 1152.51 | 8.786678   | 1152.51 | 8.786678 | 1152.51 | 8.786678 | 1152.51 | 8.786678 |
| 8.79     | 1152.51 | 8.79       | 1152.51 | 8.79     | 1152.51 | 8.79     | 1152.51 | 8.79     |
| 8.796678 | 1152.51 | 8.796678   | 1152.51 | 8.796678 | 1152.51 | 8.796678 | 1152.51 | 8.796678 |
| 8.8      | 1152.51 | 8.8        | 1152.51 | 8.8      | 1152.51 | 8.8      | 1152.51 | 8.8      |
| 8.806678 | 1152.51 | 8.806678   | 1152.51 | 8.806678 | 1152.51 | 8.806678 | 1152.51 | 8.806678 |
| 8.81     | 1152.51 | 8.81       | 1152.51 | 8.81     | 1152.51 | 8.81     | 1152.51 | 8.81     |
| 8.816678 | 1152.51 | 8.816678   | 1152.51 | 8.816678 | 1152.51 | 8.816678 | 1152.51 | 8.816678 |
| 8.82     | 1152.51 | 8.82       | 1152.51 | 8.82     | 1152.51 | 8.82     | 1152.51 | 8.82     |
| 8.826678 | 1152.51 | 8.826678   | 1152.51 | 8.826678 | 1152.51 | 8.826678 | 1152.51 | 8.826678 |
| 8.83     | 1152.51 | 8.83       | 1152.51 | 8.83     | 1152.51 | 8.83     | 1152.51 | 8.83     |
| 8.836678 | 1152.51 | 8.836678   | 1152.51 | 8.836678 | 1152.51 | 8.836678 | 1152.51 | 8.836678 |
| 8.84     | 1152.51 | 8.84       | 1152.51 | 8.84     | 1152.51 | 8.84     | 1152.51 | 8.84     |
| 8.846678 | 1152.51 | 8.846678   | 1152.51 | 8.846678 | 1152.51 | 8.846678 | 1152.51 | 8.846678 |
| 8.85     | 1152.51 | 8.85       | 1152.51 | 8.85     | 1152.51 | 8.85     | 1152.51 | 8.85     |
| 8.856678 | 1152.51 | 8.856678   | 1152.51 | 8.856678 | 1152.51 | 8.856678 | 1152.51 | 8.856678 |
| 8.86     | 1152.51 | 8.86       | 1152.51 | 8.86     | 1152.51 | 8.86     | 1152.51 | 8.86     |
| 8.866678 | 1152.51 | 8.866678</ |         |          |         |          |         |          |



|          |         |          |          |          |          |          |          |          |
|----------|---------|----------|----------|----------|----------|----------|----------|----------|
| 8.91     | 1152.51 | 8.91     | 1152.51  | 8.91     | 1152.51  | 8.91     | 1152.51  | 8.91     |
| 8.916678 | 1152.51 | 8.916678 | 1152.51  | 8.916678 | 1152.51  | 8.916678 | 1152.51  | 8.916678 |
| 8.92     | 1152.51 | 8.92     | 1152.51  | 8.92     | 1152.51  | 8.92     | 1152.51  | 8.92     |
| 8.926678 | 1152.51 | 8.926678 | 1152.51  | 8.926678 | 1152.51  | 8.926678 | 1152.51  | 8.926678 |
| 8.93     | 1152.51 | 8.93     | 1152.51  | 8.93     | 1152.51  | 8.93     | 1152.51  | 8.93     |
| 8.936678 | 1152.51 | 8.936678 | 1152.51  | 8.936678 | 1152.51  | 8.936678 | 1152.51  | 8.936678 |
| 8.94     | 1152.51 | 8.94     | 1152.51  | 8.94     | 1152.51  | 8.94     | 1152.51  | 8.94     |
| 8.946678 | 1152.51 | 8.946678 | 1152.51  | 8.946678 | 1152.51  | 8.946678 | 1152.51  | 8.946678 |
| 8.95     | 1152.51 | 8.95     | 1152.51  | 8.95     | 1152.51  | 8.95     | 1152.51  | 8.95     |
| 8.956678 | 1152.51 | 8.956678 | 1152.51  | 8.956678 | 1152.51  | 8.956678 | 1152.51  | 8.956678 |
| 8.96     | 1152.51 | 8.96     | 1152.51  | 8.96     | 1152.51  | 8.96     | 1152.51  | 8.96     |
| 8.966678 | 1152.51 | 8.966678 | 1152.51  | 8.966678 | 1152.51  | 8.966678 | 1152.51  | 8.966678 |
| 8.97     | 1152.51 | 8.97     | 1152.51  | 8.97     | 1152.51  | 8.97     | 1152.51  | 8.97     |
| 8.976678 | 1152.51 | 8.976678 | 1152.51  | 8.976678 | 1152.51  | 8.976678 | 1152.51  | 8.976678 |
| 8.98     | 1152.51 | 8.98     | 1152.51  | 8.98     | 1152.51  | 8.98     | 1152.51  | 8.98     |
| 8.986678 | 1152.51 | 8.986678 | 1152.51  | 8.986678 | 1152.51  | 8.986678 | 1152.51  | 8.986678 |
| 8.99     | 1152.51 | 8.99     | 1152.51  | 8.99     | 1152.51  | 8.99     | 1152.51  | 8.99     |
| 8.996678 | 1152.51 | 8.996678 | 1152.51  | 8.996678 | 1152.51  | 8.996678 | 1152.51  | 8.996678 |
| 8.999732 | 1152.51 | 8.998131 | 1152.51  | 8.998131 | 1152.51  | 8.998131 | 1152.51  | 8.998131 |
| 9.000827 | 1152.51 | 8.999221 | 1152.51  | 8.999221 | 1152.51  | 8.999221 | 1152.51  | 8.999221 |
| 9.00225  | 1152.51 | 9.000225 | 1152.51  | 9.000225 | 1152.51  | 9.000225 | 1152.51  | 9.000225 |
| 9.003299 | 1152.51 | 9.001254 | 1152.51  | 9.001254 | 1152.51  | 9.001254 | 1152.51  | 9.001254 |
| 9.005134 | 1152.51 | 9.002341 | 1152.51  | 9.002341 | 1152.51  | 9.002341 | 1152.51  | 9.002341 |
| 9.00674  | 1152.51 | 9.00361  | 1152.51  | 9.00361  | 1152.51  | 9.00361  | 1152.51  | 9.00361  |
| 9.008186 | 1152.51 | 9.004636 | 1152.51  | 9.004636 | 1152.51  | 9.004636 | 1152.51  | 9.004636 |
| 9.009631 | 1152.51 | 9.005663 | 1152.51  | 9.005663 | 1152.51  | 9.005663 | 1152.51  | 9.005663 |
| 9.011242 | 1152.51 | 9.006689 | 1152.51  | 9.006689 | 1152.51  | 9.006689 | 1152.51  | 9.006689 |
| 9.013132 | 1152.51 | 9.008317 | 1152.51  | 9.008317 | 1152.51  | 9.008317 | 1152.51  | 9.008317 |
| 9.014215 | 1152.51 | 9.009945 | 1152.51  | 9.009945 | 1152.51  | 9.009945 | 1152.51  | 9.009945 |
| 9.015298 | 1152.51 | 9.011033 | 1152.51  | 9.011033 | 1152.51  | 9.011033 | 1152.51  | 9.011033 |
| 9.016381 | 1152.51 | 9.012884 | 1152.51  | 9.012884 | 1152.51  | 9.012884 | 1152.51  | 9.012884 |
| 9.017464 | 1152.51 | 9.014736 | 1152.51  | 9.014736 | 1152.51  | 9.014736 | 1152.51  | 9.014736 |
| 9.02     | 1152.51 | 9.016929 | 1152.51  | 9.016929 | 1152.51  | 9.016929 | 1152.51  | 9.016929 |
| 9.021331 | 1152.51 | 9.019123 | 1152.51  | 9.019123 | 1152.51  | 9.019123 | 1152.51  | 9.019123 |
| 9.022559 | 1152.51 | 9.020313 | 1152.51  | 9.020313 | 1152.51  | 9.020313 | 1152.51  | 9.020313 |
| 9.023992 | 1152.51 | 9.021573 | 1152.51  | 9.021573 | 1152.51  | 9.021573 | 1152.51  | 9.021573 |
| 9.025246 | 1152.51 | 9.022808 | 1152.51  | 9.022808 | 1152.51  | 9.022808 | 1152.51  | 9.022808 |
| 9.026661 | 1152.51 | 9.023888 | 1152.51  | 9.023888 | 1152.51  | 9.023888 | 1152.51  | 9.023888 |
| 9.028077 | 1152.51 | 9.025779 | 1152.51  | 9.025779 | 1152.51  | 9.025779 | 1152.51  | 9.025779 |
| 9.02908  | 1152.51 | 9.027316 | 1152.51  | 9.027316 | 1152.51  | 9.027316 | 1152.51  | 9.027316 |
| 9.030377 | 1152.51 | 9.028853 | 1152.51  | 9.028853 | 1152.51  | 9.028853 | 1152.51  | 9.028853 |
| 9.031868 | 1152.51 | 9.029888 | 1152.51  | 9.029888 | 1152.51  | 9.029888 | 1152.51  | 9.029888 |
| 9.033608 | 1152.51 | 9.031001 | 1152.511 | 9.031001 | 1152.511 | 9.031001 | 1152.511 | 9.031001 |
| 9.035027 | 1152.51 | 9.032363 | 1152.511 | 9.032363 | 1152.511 | 9.032363 | 1152.511 | 9.032363 |
| 9.036555 | 1152.51 | 9.033598 | 1152.51  | 9.033598 | 1152.51  | 9.033598 | 1152.51  | 9.033598 |
| 9.038082 | 1152.51 | 9.035019 | 1152.509 | 9.035019 | 1152.509 | 9.035019 | 1152.509 | 9.035019 |
| 9.03961  | 1152.51 | 9.03644  | 1152.509 | 9.03644  | 1152.509 | 9.03644  | 1152.509 | 9.03644  |

|          |         |          |          |          |          |          |          |          |
|----------|---------|----------|----------|----------|----------|----------|----------|----------|
| 9.041084 | 1152.51 | 9.037861 | 1152.51  | 9.037861 | 1152.51  | 9.037861 | 1152.51  | 9.037861 |
| 9.043012 | 1152.51 | 9.039282 | 1152.508 | 9.039282 | 1152.508 | 9.039282 | 1152.508 | 9.039282 |
| 9.045662 | 1152.51 | 9.040722 | 1152.505 | 9.040722 | 1152.505 | 9.040722 | 1152.505 | 9.040722 |
| 9.047349 | 1152.51 | 9.04175  | 1152.504 | 9.04175  | 1152.504 | 9.04175  | 1152.504 | 9.04175  |
| 9.049036 | 1152.51 | 9.042924 | 1152.504 | 9.042924 | 1152.504 | 9.042924 | 1152.504 | 9.042924 |
| 9.050241 | 1152.51 | 9.044098 | 1152.503 | 9.044098 | 1152.503 | 9.044098 | 1152.503 | 9.044098 |
| 9.0517   | 1152.51 | 9.045713 | 1152.501 | 9.045713 | 1152.501 | 9.045713 | 1152.501 | 9.045713 |
| 9.053012 | 1152.51 | 9.04674  | 1152.499 | 9.04674  | 1152.499 | 9.04674  | 1152.499 | 9.04674  |
| 9.054817 | 1152.51 | 9.047767 | 1152.498 | 9.047767 | 1152.498 | 9.047767 | 1152.498 | 9.047767 |
| 9.055966 | 1152.51 | 9.048795 | 1152.497 | 9.048795 | 1152.497 | 9.048795 | 1152.497 | 9.048795 |
| 9.057114 | 1152.51 | 9.05     | 1152.496 | 9.05     | 1152.496 | 9.05     | 1152.496 | 9.05     |
| 9.059124 | 1152.51 | 9.051397 | 1152.494 | 9.051397 | 1152.494 | 9.051397 | 1152.494 | 9.051397 |
| 9.060287 | 1152.51 | 9.052714 | 1152.492 | 9.052714 | 1152.492 | 9.052714 | 1152.492 | 9.052714 |
| 9.061663 | 1152.51 | 9.053867 | 1152.49  | 9.053867 | 1152.49  | 9.053867 | 1152.49  | 9.053867 |
| 9.063011 | 1152.51 | 9.05502  | 1152.488 | 9.05502  | 1152.488 | 9.05502  | 1152.488 | 9.05502  |
| 9.06419  | 1152.51 | 9.056172 | 1152.487 | 9.056172 | 1152.487 | 9.056172 | 1152.487 | 9.056172 |
| 9.066255 | 1152.51 | 9.05819  | 1152.484 | 9.05819  | 1152.484 | 9.05819  | 1152.484 | 9.05819  |
| 9.068319 | 1152.51 | 9.06     | 1152.481 | 9.06     | 1152.481 | 9.06     | 1152.481 | 9.06     |
| 9.07     | 1152.51 | 9.061279 | 1152.479 | 9.061279 | 1152.479 | 9.061279 | 1152.479 | 9.061279 |
| 9.071146 | 1152.51 | 9.062339 | 1152.478 | 9.062339 | 1152.478 | 9.062339 | 1152.478 | 9.062339 |
| 9.072284 | 1152.51 | 9.064194 | 1152.475 | 9.064194 | 1152.475 | 9.064194 | 1152.475 | 9.064194 |
| 9.076314 | 1152.51 | 9.06626  | 1152.472 | 9.06626  | 1152.472 | 9.06626  | 1152.472 | 9.06626  |
| 9.079001 | 1152.51 | 9.068325 | 1152.469 | 9.068325 | 1152.469 | 9.068325 | 1152.469 | 9.068325 |
| 9.080384 | 1152.51 | 9.07     | 1152.466 | 9.07     | 1152.466 | 9.07     | 1152.466 | 9.07     |
| 9.083072 | 1152.51 | 9.071122 | 1152.464 | 9.071122 | 1152.464 | 9.071122 | 1152.464 | 9.071122 |
| 9.085759 | 1152.51 | 9.072312 | 1152.462 | 9.072312 | 1152.462 | 9.072312 | 1152.462 | 9.072312 |
| 9.088178 | 1152.51 | 9.074562 | 1152.459 | 9.074562 | 1152.459 | 9.074562 | 1152.459 | 9.074562 |
| 9.09     | 1152.51 | 9.08     | 1152.45  | 9.08     | 1152.45  | 9.08     | 1152.45  | 9.08     |
| 9.092765 | 1152.51 | 9.082571 | 1152.446 | 9.082571 | 1152.446 | 9.082571 | 1152.446 | 9.082571 |
| 9.094862 | 1152.51 | 9.09     | 1152.434 | 9.09     | 1152.434 | 9.09     | 1152.434 | 9.09     |
| 9.09696  | 1152.51 | 9.092571 | 1152.43  | 9.092571 | 1152.43  | 9.092571 | 1152.43  | 9.092571 |
| 9.099058 | 1152.51 | 9.099732 | 1152.419 | 9.1      | 1152.419 | 9.1      | 1152.419 | 9.1      |
| 9.1003   | 1152.51 | 9.100827 | 1152.417 | 9.102571 | 1152.415 | 9.102571 | 1152.415 | 9.102571 |
| 9.102397 | 1152.51 | 9.10225  | 1152.415 | 9.11     | 1152.403 | 9.11     | 1152.403 | 9.11     |
| 9.104378 | 1152.51 | 9.103299 | 1152.413 | 9.112571 | 1152.399 | 9.112571 | 1152.399 | 9.112571 |
| 9.106358 | 1152.51 | 9.105134 | 1152.411 | 9.12     | 1152.387 | 9.12     | 1152.387 | 9.12     |
| 9.108338 | 1152.51 | 9.10674  | 1152.408 | 9.122571 | 1152.383 | 9.122571 | 1152.383 | 9.122571 |
| 9.11     | 1152.51 | 9.108186 | 1152.406 | 9.13     | 1152.371 | 9.13     | 1152.371 | 9.13     |
| 9.112263 | 1152.51 | 9.109631 | 1152.403 | 9.132571 | 1152.367 | 9.132571 | 1152.367 | 9.132571 |
| 9.114134 | 1152.51 | 9.111242 | 1152.401 | 9.14     | 1152.355 | 9.14     | 1152.355 | 9.14     |
| 9.116004 | 1152.51 | 9.113132 | 1152.398 | 9.142571 | 1152.351 | 9.142571 | 1152.351 | 9.142571 |
| 9.117875 | 1152.51 | 9.114215 | 1152.396 | 9.15     | 1152.339 | 9.15     | 1152.339 | 9.15     |
| 9.12     | 1152.51 | 9.115298 | 1152.394 | 9.152571 | 1152.334 | 9.152571 | 1152.334 | 9.152571 |
| 9.122138 | 1152.51 | 9.116381 | 1152.393 | 9.16     | 1152.322 | 9.16     | 1152.322 | 9.16     |
| 9.1239   | 1152.51 | 9.117464 | 1152.391 | 9.162571 | 1152.318 | 9.162571 | 1152.318 | 9.162571 |
| 9.125663 | 1152.51 | 9.12     | 1152.387 | 9.17     | 1152.306 | 9.17     | 1152.306 | 9.17     |
| 9.127425 | 1152.51 | 9.121331 | 1152.385 | 9.172571 | 1152.302 | 9.172571 | 1152.302 | 9.172571 |

|          |         |          |          |          |          |          |          |          |
|----------|---------|----------|----------|----------|----------|----------|----------|----------|
| 9.13     | 1152.51 | 9.122559 | 1152.383 | 9.18     | 1152.29  | 9.18     | 1152.29  | 9.18     |
| 9.132014 | 1152.51 | 9.123992 | 1152.381 | 9.182571 | 1152.285 | 9.182571 | 1152.285 | 9.182571 |
| 9.13367  | 1152.51 | 9.125246 | 1152.379 | 9.19     | 1152.273 | 9.19     | 1152.273 | 9.19     |
| 9.135326 | 1152.51 | 9.126661 | 1152.376 | 9.192571 | 1152.269 | 9.192571 | 1152.269 | 9.192571 |
| 9.136981 | 1152.51 | 9.128077 | 1152.374 | 9.199732 | 1152.257 | 9.2      | 1152.257 | 9.2      |
| 9.14     | 1152.51 | 9.129077 | 1152.373 | 9.200827 | 1152.256 | 9.202571 | 1152.253 | 9.202571 |
| 9.141892 | 1152.51 | 9.130372 | 1152.37  | 9.20225  | 1152.253 | 9.21     | 1152.24  | 9.21     |
| 9.143443 | 1152.51 | 9.131862 | 1152.368 | 9.203299 | 1152.251 | 9.212571 | 1152.236 | 9.212571 |
| 9.144994 | 1152.51 | 9.1336   | 1152.365 | 9.205134 | 1152.248 | 9.22     | 1152.224 | 9.22     |
| 9.146545 | 1152.51 | 9.135019 | 1152.363 | 9.20674  | 1152.246 | 9.222571 | 1152.22  | 9.222571 |
| 9.15     | 1152.51 | 9.136546 | 1152.361 | 9.208186 | 1152.243 | 9.23     | 1152.208 | 9.23     |
| 9.151772 | 1152.51 | 9.138074 | 1152.358 | 9.209631 | 1152.241 | 9.232571 | 1152.203 | 9.232571 |
| 9.15322  | 1152.51 | 9.139601 | 1152.356 | 9.211242 | 1152.238 | 9.24     | 1152.191 | 9.24     |
| 9.154668 | 1152.51 | 9.141084 | 1152.353 | 9.213132 | 1152.235 | 9.242571 | 1152.187 | 9.242571 |
| 9.156116 | 1152.51 | 9.143011 | 1152.35  | 9.214215 | 1152.234 | 9.25     | 1152.175 | 9.25     |
| 9.16     | 1152.51 | 9.145662 | 1152.346 | 9.215298 | 1152.232 | 9.252571 | 1152.17  | 9.252571 |
| 9.161655 | 1152.51 | 9.147349 | 1152.343 | 9.216381 | 1152.23  | 9.26     | 1152.158 | 9.26     |
| 9.163002 | 1152.51 | 9.149035 | 1152.34  | 9.217464 | 1152.228 | 9.262571 | 1152.154 | 9.262571 |
| 9.164349 | 1152.51 | 9.150241 | 1152.338 | 9.22     | 1152.224 | 9.27     | 1152.142 | 9.27     |
| 9.165696 | 1152.51 | 9.1517   | 1152.336 | 9.221331 | 1152.222 | 9.272571 | 1152.137 | 9.272571 |
| 9.17     | 1152.51 | 9.153012 | 1152.334 | 9.222559 | 1152.22  | 9.28     | 1152.125 | 9.28     |
| 9.17154  | 1152.51 | 9.154817 | 1152.331 | 9.223992 | 1152.217 | 9.282571 | 1152.121 | 9.282571 |
| 9.172789 | 1152.51 | 9.155966 | 1152.329 | 9.225246 | 1152.215 | 9.29     | 1152.109 | 9.29     |
| 9.174038 | 1152.51 | 9.157114 | 1152.327 | 9.226661 | 1152.213 | 9.292571 | 1152.104 | 9.292571 |
| 9.175288 | 1152.51 | 9.159124 | 1152.324 | 9.228077 | 1152.211 | 9.299732 | 1152.093 | 9.3      |
| 9.179661 | 1152.51 | 9.160287 | 1152.322 | 9.229077 | 1152.209 | 9.300827 | 1152.091 | 9.302571 |
| 9.18121  | 1152.51 | 9.161663 | 1152.32  | 9.230372 | 1152.207 | 9.30225  | 1152.088 | 9.31     |
| 9.182235 | 1152.51 | 9.163011 | 1152.318 | 9.231862 | 1152.205 | 9.303299 | 1152.087 | 9.312571 |
| 9.18326  | 1152.51 | 9.164191 | 1152.316 | 9.2336   | 1152.202 | 9.305134 | 1152.084 | 9.32     |
| 9.185053 | 1152.51 | 9.166255 | 1152.312 | 9.235019 | 1152.199 | 9.30674  | 1152.081 | 9.322571 |
| 9.186526 | 1152.51 | 9.168319 | 1152.309 | 9.236546 | 1152.197 | 9.308186 | 1152.079 | 9.33     |
| 9.187998 | 1152.51 | 9.17     | 1152.306 | 9.238074 | 1152.194 | 9.309631 | 1152.076 | 9.332571 |
| 9.189471 | 1152.51 | 9.171146 | 1152.304 | 9.239601 | 1152.192 | 9.311242 | 1152.074 | 9.34     |
| 9.191683 | 1152.51 | 9.172285 | 1152.303 | 9.241084 | 1152.189 | 9.313132 | 1152.071 | 9.342571 |
| 9.193155 | 1152.51 | 9.176312 | 1152.296 | 9.243011 | 1152.186 | 9.314215 | 1152.069 | 9.35     |
| 9.194377 | 1152.51 | 9.178999 | 1152.292 | 9.245662 | 1152.182 | 9.315298 | 1152.067 | 9.352571 |
| 9.195599 | 1152.51 | 9.18     | 1152.29  | 9.247349 | 1152.179 | 9.316381 | 1152.065 | 9.36     |
| 9.196821 | 1152.51 | 9.183071 | 1152.285 | 9.249035 | 1152.176 | 9.317464 | 1152.063 | 9.362571 |
| 9.19961  | 1152.51 | 9.185757 | 1152.28  | 9.250241 | 1152.174 | 9.32     | 1152.059 | 9.37     |
| 9.200854 | 1152.51 | 9.188175 | 1152.276 | 9.2517   | 1152.172 | 9.321331 | 1152.057 | 9.372571 |
| 9.203046 | 1152.51 | 9.19     | 1152.273 | 9.253012 | 1152.17  | 9.322559 | 1152.055 | 9.38     |
| 9.204302 | 1152.51 | 9.192764 | 1152.269 | 9.254817 | 1152.167 | 9.323992 | 1152.053 | 9.382571 |
| 9.205558 | 1152.51 | 9.19486  | 1152.266 | 9.255966 | 1152.165 | 9.325246 | 1152.051 | 9.39     |
| 9.206813 | 1152.51 | 9.196957 | 1152.262 | 9.257114 | 1152.163 | 9.326661 | 1152.048 | 9.392571 |
| 9.209011 | 1152.51 | 9.199054 | 1152.259 | 9.259124 | 1152.16  | 9.328077 | 1152.046 | 9.399732 |
| 9.210314 | 1152.51 | 9.2003   | 1152.257 | 9.260287 | 1152.158 | 9.329077 | 1152.044 | 9.400827 |
| 9.211413 | 1152.51 | 9.202396 | 1152.253 | 9.261663 | 1152.155 | 9.330372 | 1152.042 | 9.40225  |

|          |         |          |          |          |          |          |          |          |
|----------|---------|----------|----------|----------|----------|----------|----------|----------|
| 9.212637 | 1152.51 | 9.204376 | 1152.25  | 9.263011 | 1152.153 | 9.331862 | 1152.04  | 9.403299 |
| 9.213739 | 1152.51 | 9.206355 | 1152.247 | 9.264191 | 1152.151 | 9.3336   | 1152.037 | 9.405134 |
| 9.21484  | 1152.51 | 9.208334 | 1152.243 | 9.266255 | 1152.148 | 9.335019 | 1152.034 | 9.40674  |
| 9.215942 | 1152.51 | 9.21     | 1152.241 | 9.268319 | 1152.144 | 9.336546 | 1152.032 | 9.408186 |
| 9.21787  | 1152.51 | 9.212262 | 1152.237 | 9.27     | 1152.142 | 9.338074 | 1152.029 | 9.409631 |
| 9.219798 | 1152.51 | 9.214132 | 1152.234 | 9.271146 | 1152.14  | 9.339601 | 1152.027 | 9.411242 |
| 9.221278 | 1152.51 | 9.216001 | 1152.231 | 9.272285 | 1152.138 | 9.341084 | 1152.024 | 9.413132 |
| 9.222394 | 1152.51 | 9.217871 | 1152.228 | 9.276312 | 1152.131 | 9.343011 | 1152.021 | 9.414215 |
| 9.223398 | 1152.51 | 9.22     | 1152.224 | 9.278999 | 1152.127 | 9.345662 | 1152.017 | 9.415298 |
| 9.224403 | 1152.51 | 9.222137 | 1152.221 | 9.28     | 1152.125 | 9.347349 | 1152.014 | 9.416381 |
| 9.225408 | 1152.51 | 9.223898 | 1152.218 | 9.283071 | 1152.12  | 9.349035 | 1152.011 | 9.417464 |
| 9.227166 | 1152.51 | 9.22566  | 1152.215 | 9.285757 | 1152.116 | 9.350241 | 1152.009 | 9.42     |
| 9.228924 | 1152.51 | 9.227421 | 1152.212 | 9.288175 | 1152.112 | 9.3517   | 1152.007 | 9.421331 |
| 9.23     | 1152.51 | 9.23     | 1152.208 | 9.29     | 1152.109 | 9.353012 | 1152.005 | 9.422559 |
| 9.23118  | 1152.51 | 9.232013 | 1152.204 | 9.292764 | 1152.104 | 9.354817 | 1152.002 | 9.423992 |
| 9.232214 | 1152.51 | 9.233668 | 1152.202 | 9.29486  | 1152.101 | 9.355966 | 1152     | 9.425246 |
| 9.234076 | 1152.51 | 9.235323 | 1152.199 | 9.296957 | 1152.097 | 9.357114 | 1151.998 | 9.426661 |
| 9.235111 | 1152.51 | 9.236978 | 1152.196 | 9.299054 | 1152.094 | 9.359124 | 1151.995 | 9.428077 |
| 9.24     | 1152.51 | 9.24     | 1152.191 | 9.3003   | 1152.092 | 9.360287 | 1151.993 | 9.429077 |
| 9.241016 | 1152.51 | 9.241891 | 1152.188 | 9.302396 | 1152.088 | 9.361663 | 1151.99  | 9.430372 |
| 9.247236 | 1152.51 | 9.243441 | 1152.186 | 9.304376 | 1152.085 | 9.363011 | 1151.988 | 9.431862 |
| 9.25     | 1152.51 | 9.244991 | 1152.183 | 9.306355 | 1152.082 | 9.364191 | 1151.986 | 9.4336   |
| 9.257109 | 1152.51 | 9.246541 | 1152.181 | 9.308334 | 1152.078 | 9.366255 | 1151.983 | 9.435019 |
| 9.26     | 1152.51 | 9.25     | 1152.175 | 9.31     | 1152.076 | 9.368319 | 1151.979 | 9.436546 |
| 9.267109 | 1152.51 | 9.251771 | 1152.172 | 9.312262 | 1152.072 | 9.37     | 1151.977 | 9.438074 |
| 9.27     | 1152.51 | 9.253218 | 1152.17  | 9.314132 | 1152.069 | 9.371146 | 1151.975 | 9.439601 |
| 9.277109 | 1152.51 | 9.254665 | 1152.167 | 9.316001 | 1152.066 | 9.372285 | 1151.973 | 9.441084 |
| 9.28     | 1152.51 | 9.256112 | 1152.165 | 9.317871 | 1152.063 | 9.376312 | 1151.966 | 9.443011 |
| 9.287109 | 1152.51 | 9.26     | 1152.158 | 9.32     | 1152.059 | 9.378999 | 1151.962 | 9.445662 |
| 9.29     | 1152.51 | 9.261654 | 1152.156 | 9.322137 | 1152.056 | 9.38     | 1151.96  | 9.447349 |
| 9.297109 | 1152.51 | 9.263    | 1152.153 | 9.323898 | 1152.053 | 9.383071 | 1151.955 | 9.449035 |
| 9.3      | 1152.51 | 9.264346 | 1152.151 | 9.32566  | 1152.05  | 9.385757 | 1151.951 | 9.450241 |
| 9.307109 | 1152.51 | 9.265693 | 1152.149 | 9.327421 | 1152.047 | 9.388175 | 1151.947 | 9.4517   |
| 9.31     | 1152.51 | 9.27     | 1152.142 | 9.33     | 1152.043 | 9.39     | 1151.944 | 9.453012 |
| 9.317109 | 1152.51 | 9.271539 | 1152.139 | 9.332013 | 1152.039 | 9.392764 | 1151.939 | 9.454817 |
| 9.32     | 1152.51 | 9.272787 | 1152.137 | 9.333668 | 1152.037 | 9.39486  | 1151.936 | 9.455966 |
| 9.327109 | 1152.51 | 9.274036 | 1152.135 | 9.335323 | 1152.034 | 9.396957 | 1151.932 | 9.457114 |
| 9.33     | 1152.51 | 9.275285 | 1152.133 | 9.336978 | 1152.031 | 9.399054 | 1151.929 | 9.459124 |
| 9.337109 | 1152.51 | 9.279655 | 1152.126 | 9.34     | 1152.026 | 9.4003   | 1151.927 | 9.460287 |
| 9.34     | 1152.51 | 9.28121  | 1152.123 | 9.341891 | 1152.023 | 9.402396 | 1151.923 | 9.461663 |
| 9.347109 | 1152.51 | 9.282234 | 1152.122 | 9.343441 | 1152.021 | 9.404376 | 1151.92  | 9.463011 |
| 9.35     | 1152.51 | 9.283258 | 1152.12  | 9.344991 | 1152.018 | 9.406355 | 1151.917 | 9.464191 |
| 9.357109 | 1152.51 | 9.28505  | 1152.117 | 9.346541 | 1152.015 | 9.408334 | 1151.913 | 9.466255 |
| 9.36     | 1152.51 | 9.286522 | 1152.115 | 9.35     | 1152.01  | 9.41     | 1151.911 | 9.468319 |
| 9.367109 | 1152.51 | 9.287993 | 1152.112 | 9.351771 | 1152.007 | 9.412262 | 1151.907 | 9.47     |
| 9.37     | 1152.51 | 9.289465 | 1152.11  | 9.353218 | 1152.004 | 9.414132 | 1151.904 | 9.471146 |
| 9.377109 | 1152.51 | 9.291682 | 1152.106 | 9.354665 | 1152.002 | 9.416001 | 1151.901 | 9.472285 |

|          |         |          |          |          |          |          |          |          |
|----------|---------|----------|----------|----------|----------|----------|----------|----------|
| 9.38     | 1152.51 | 9.293153 | 1152.104 | 9.356112 | 1152     | 9.417871 | 1151.898 | 9.476312 |
| 9.387109 | 1152.51 | 9.294374 | 1152.102 | 9.36     | 1151.993 | 9.42     | 1151.894 | 9.478999 |
| 9.39     | 1152.51 | 9.295595 | 1152.1   | 9.361654 | 1151.99  | 9.422137 | 1151.891 | 9.48     |
| 9.397109 | 1152.51 | 9.296815 | 1152.098 | 9.363    | 1151.988 | 9.423898 | 1151.888 | 9.483071 |
| 9.4      | 1152.51 | 9.3      | 1152.092 | 9.364346 | 1151.986 | 9.42566  | 1151.885 | 9.485757 |
| 9.407109 | 1152.51 | 9.301395 | 1152.09  | 9.365693 | 1151.984 | 9.427421 | 1151.882 | 9.488175 |
| 9.41     | 1152.51 | 9.302616 | 1152.088 | 9.37     | 1151.977 | 9.43     | 1151.878 | 9.49     |
| 9.417109 | 1152.51 | 9.303715 | 1152.086 | 9.371539 | 1151.974 | 9.432013 | 1151.874 | 9.492764 |
| 9.42     | 1152.51 | 9.304813 | 1152.084 | 9.372787 | 1151.972 | 9.433668 | 1151.872 | 9.49486  |
| 9.427109 | 1152.51 | 9.305912 | 1152.083 | 9.374036 | 1151.97  | 9.435323 | 1151.869 | 9.496957 |
| 9.43     | 1152.51 | 9.31     | 1152.076 | 9.375285 | 1151.968 | 9.436978 | 1151.866 | 9.499054 |
| 9.437109 | 1152.51 | 9.311256 | 1152.074 | 9.379655 | 1151.961 | 9.44     | 1151.861 | 9.5003   |
| 9.44     | 1152.51 | 9.312354 | 1152.072 | 9.38121  | 1151.958 | 9.441891 | 1151.858 | 9.502396 |
| 9.447109 | 1152.51 | 9.314332 | 1152.069 | 9.382234 | 1151.956 | 9.443441 | 1151.855 | 9.504376 |
| 9.45     | 1152.51 | 9.318499 | 1152.062 | 9.383258 | 1151.955 | 9.444991 | 1151.853 | 9.506355 |
| 9.457109 | 1152.51 | 9.32     | 1152.059 | 9.38505  | 1151.952 | 9.446541 | 1151.85  | 9.508334 |
| 9.46     | 1152.51 | 9.321625 | 1152.057 | 9.386522 | 1151.949 | 9.45     | 1151.845 | 9.51     |
| 9.467109 | 1152.51 | 9.323674 | 1152.053 | 9.387993 | 1151.947 | 9.451771 | 1151.842 | 9.512262 |
| 9.47     | 1152.51 | 9.324751 | 1152.052 | 9.389465 | 1151.945 | 9.453218 | 1151.839 | 9.514132 |
| 9.477109 | 1152.51 | 9.325828 | 1152.05  | 9.391682 | 1151.941 | 9.454665 | 1151.837 | 9.516001 |
| 9.48     | 1152.51 | 9.326905 | 1152.048 | 9.393153 | 1151.938 | 9.456112 | 1151.834 | 9.517871 |
| 9.487109 | 1152.51 | 9.328789 | 1152.045 | 9.394374 | 1151.936 | 9.46     | 1151.828 | 9.52     |
| 9.49     | 1152.51 | 9.33     | 1152.043 | 9.395595 | 1151.934 | 9.461654 | 1151.825 | 9.522137 |
| 9.497109 | 1152.51 | 9.331218 | 1152.041 | 9.396815 | 1151.932 | 9.463    | 1151.823 | 9.523898 |
| 9.5      | 1152.51 | 9.332275 | 1152.039 | 9.4      | 1151.927 | 9.464346 | 1151.821 | 9.52566  |
| 9.507109 | 1152.51 | 9.334039 | 1152.036 | 9.401395 | 1151.925 | 9.465693 | 1151.819 | 9.527421 |
| 9.51     | 1152.51 | 9.335295 | 1152.034 | 9.402616 | 1151.923 | 9.47     | 1151.812 | 9.53     |
| 9.517109 | 1152.51 | 9.336663 | 1152.032 | 9.403715 | 1151.921 | 9.471539 | 1151.809 | 9.532013 |
| 9.52     | 1152.51 | 9.34     | 1152.026 | 9.404813 | 1151.919 | 9.472787 | 1151.807 | 9.533668 |
| 9.527109 | 1152.51 | 9.341563 | 1152.024 | 9.405912 | 1151.917 | 9.474036 | 1151.805 | 9.535323 |
| 9.53     | 1152.51 | 9.35     | 1152.01  | 9.41     | 1151.911 | 9.475285 | 1151.803 | 9.536978 |
| 9.537109 | 1152.51 | 9.351563 | 1152.007 | 9.411256 | 1151.909 | 9.479655 | 1151.796 | 9.54     |
| 9.54     | 1152.51 | 9.36     | 1151.993 | 9.412354 | 1151.907 | 9.48121  | 1151.793 | 9.541891 |
| 9.547109 | 1152.51 | 9.361563 | 1151.991 | 9.414332 | 1151.903 | 9.482234 | 1151.791 | 9.543441 |
| 9.55     | 1152.51 | 9.37     | 1151.977 | 9.418499 | 1151.897 | 9.483258 | 1151.79  | 9.544991 |
| 9.557109 | 1152.51 | 9.371563 | 1151.974 | 9.42     | 1151.894 | 9.48505  | 1151.787 | 9.546541 |
| 9.56     | 1152.51 | 9.38     | 1151.96  | 9.421625 | 1151.891 | 9.486522 | 1151.784 | 9.55     |
| 9.567109 | 1152.51 | 9.381563 | 1151.958 | 9.423674 | 1151.888 | 9.487993 | 1151.782 | 9.551771 |
| 9.57     | 1152.51 | 9.39     | 1151.944 | 9.424751 | 1151.886 | 9.489465 | 1151.779 | 9.553218 |
| 9.577109 | 1152.51 | 9.391563 | 1151.941 | 9.425828 | 1151.884 | 9.491682 | 1151.776 | 9.554665 |
| 9.58     | 1152.51 | 9.4      | 1151.927 | 9.426905 | 1151.883 | 9.493153 | 1151.773 | 9.556112 |
| 9.587109 | 1152.51 | 9.401563 | 1151.925 | 9.428789 | 1151.88  | 9.494374 | 1151.771 | 9.56     |
| 9.59     | 1152.51 | 9.41     | 1151.911 | 9.43     | 1151.878 | 9.495595 | 1151.769 | 9.561654 |
| 9.597109 | 1152.51 | 9.411563 | 1151.908 | 9.431218 | 1151.876 | 9.496815 | 1151.767 | 9.563    |
| 9.6      | 1152.51 | 9.42     | 1151.894 | 9.432275 | 1151.874 | 9.5      | 1151.762 | 9.564346 |
| 9.607109 | 1152.51 | 9.421563 | 1151.892 | 9.434039 | 1151.871 | 9.501395 | 1151.76  | 9.565693 |
| 9.61     | 1152.51 | 9.43     | 1151.878 | 9.435295 | 1151.869 | 9.502616 | 1151.758 | 9.57     |

|          |         |          |          |          |          |          |          |          |
|----------|---------|----------|----------|----------|----------|----------|----------|----------|
| 9.617109 | 1152.51 | 9.431563 | 1151.875 | 9.436663 | 1151.867 | 9.503715 | 1151.756 | 9.571539 |
| 9.62     | 1152.51 | 9.44     | 1151.861 | 9.44     | 1151.861 | 9.504813 | 1151.754 | 9.572787 |
| 9.627109 | 1152.51 | 9.441563 | 1151.859 | 9.441563 | 1151.858 | 9.505912 | 1151.752 | 9.574036 |
| 9.63     | 1152.51 | 9.45     | 1151.845 | 9.45     | 1151.845 | 9.51     | 1151.745 | 9.575285 |
| 9.637109 | 1152.51 | 9.451563 | 1151.842 | 9.451563 | 1151.842 | 9.511256 | 1151.743 | 9.579655 |
| 9.64     | 1152.51 | 9.46     | 1151.828 | 9.46     | 1151.828 | 9.512354 | 1151.742 | 9.58121  |
| 9.647109 | 1152.51 | 9.461563 | 1151.826 | 9.461563 | 1151.825 | 9.514332 | 1151.738 | 9.582234 |
| 9.65     | 1152.51 | 9.47     | 1151.812 | 9.47     | 1151.812 | 9.518499 | 1151.731 | 9.583258 |
| 9.657109 | 1152.51 | 9.471563 | 1151.809 | 9.471563 | 1151.809 | 9.52     | 1151.729 | 9.58505  |
| 9.66     | 1152.51 | 9.48     | 1151.795 | 9.48     | 1151.795 | 9.521625 | 1151.726 | 9.586522 |
| 9.667109 | 1152.51 | 9.481563 | 1151.793 | 9.481563 | 1151.792 | 9.523674 | 1151.723 | 9.587993 |
| 9.67     | 1152.51 | 9.49     | 1151.779 | 9.49     | 1151.778 | 9.524751 | 1151.721 | 9.589465 |
| 9.677109 | 1152.51 | 9.491563 | 1151.776 | 9.491563 | 1151.776 | 9.525828 | 1151.719 | 9.591682 |
| 9.68     | 1152.51 | 9.5      | 1151.762 | 9.5      | 1151.762 | 9.526905 | 1151.717 | 9.593153 |
| 9.687109 | 1152.51 | 9.501563 | 1151.76  | 9.501563 | 1151.759 | 9.528789 | 1151.714 | 9.594374 |
| 9.69     | 1152.51 | 9.51     | 1151.746 | 9.51     | 1151.745 | 9.53     | 1151.712 | 9.595595 |
| 9.697109 | 1152.51 | 9.511563 | 1151.743 | 9.511563 | 1151.743 | 9.531218 | 1151.71  | 9.596815 |
| 9.7      | 1152.51 | 9.52     | 1151.729 | 9.52     | 1151.729 | 9.532275 | 1151.709 | 9.6      |
| 9.707109 | 1152.51 | 9.521563 | 1151.727 | 9.521563 | 1151.726 | 9.534039 | 1151.706 | 9.601395 |
| 9.71     | 1152.51 | 9.53     | 1151.713 | 9.53     | 1151.712 | 9.535295 | 1151.704 | 9.602616 |
| 9.717109 | 1152.51 | 9.531563 | 1151.71  | 9.531563 | 1151.71  | 9.536663 | 1151.701 | 9.603715 |
| 9.72     | 1152.51 | 9.54     | 1151.696 | 9.54     | 1151.696 | 9.54     | 1151.696 | 9.604813 |
| 9.727109 | 1152.51 | 9.541563 | 1151.693 | 9.541563 | 1151.693 | 9.541563 | 1151.693 | 9.605912 |
| 9.73     | 1152.51 | 9.55     | 1151.68  | 9.55     | 1151.679 | 9.55     | 1151.679 | 9.61     |
| 9.737109 | 1152.51 | 9.551563 | 1151.677 | 9.551563 | 1151.677 | 9.551563 | 1151.677 | 9.611256 |
| 9.74     | 1152.51 | 9.56     | 1151.663 | 9.56     | 1151.663 | 9.56     | 1151.663 | 9.612354 |
| 9.747109 | 1152.51 | 9.561563 | 1151.66  | 9.561563 | 1151.66  | 9.561563 | 1151.66  | 9.614332 |
| 9.75     | 1152.51 | 9.57     | 1151.646 | 9.57     | 1151.646 | 9.57     | 1151.646 | 9.618499 |
| 9.757109 | 1152.51 | 9.571563 | 1151.644 | 9.571563 | 1151.644 | 9.571563 | 1151.644 | 9.62     |
| 9.76     | 1152.51 | 9.58     | 1151.63  | 9.58     | 1151.63  | 9.58     | 1151.63  | 9.621625 |
| 9.767109 | 1152.51 | 9.581563 | 1151.627 | 9.581563 | 1151.627 | 9.581563 | 1151.627 | 9.623674 |
| 9.77     | 1152.51 | 9.59     | 1151.613 | 9.59     | 1151.613 | 9.59     | 1151.613 | 9.624751 |
| 9.777109 | 1152.51 | 9.591563 | 1151.611 | 9.591563 | 1151.611 | 9.591563 | 1151.611 | 9.625828 |
| 9.78     | 1152.51 | 9.6      | 1151.597 | 9.6      | 1151.597 | 9.6      | 1151.597 | 9.626905 |
| 9.787109 | 1152.51 | 9.601563 | 1151.594 | 9.601563 | 1151.594 | 9.601563 | 1151.594 | 9.628789 |
| 9.79     | 1152.51 | 9.61     | 1151.58  | 9.61     | 1151.58  | 9.61     | 1151.58  | 9.63     |
| 9.797109 | 1152.51 | 9.611563 | 1151.578 | 9.611563 | 1151.578 | 9.611563 | 1151.578 | 9.631218 |
| 9.8      | 1152.51 | 9.62     | 1151.564 | 9.62     | 1151.564 | 9.62     | 1151.564 | 9.632275 |
| 9.807109 | 1152.51 | 9.621563 | 1151.561 | 9.621563 | 1151.561 | 9.621563 | 1151.561 | 9.634039 |
| 9.81     | 1152.51 | 9.63     | 1151.547 | 9.63     | 1151.547 | 9.63     | 1151.547 | 9.635295 |
| 9.817109 | 1152.51 | 9.631563 | 1151.545 | 9.631563 | 1151.545 | 9.631563 | 1151.545 | 9.636663 |
| 9.82     | 1152.51 | 9.64     | 1151.531 | 9.64     | 1151.531 | 9.64     | 1151.531 | 9.64     |
| 9.827109 | 1152.51 | 9.641563 | 1151.528 | 9.641563 | 1151.528 | 9.641563 | 1151.528 | 9.641563 |
| 9.83     | 1152.51 | 9.65     | 1151.514 | 9.65     | 1151.514 | 9.65     | 1151.514 | 9.65     |
| 9.837109 | 1152.51 | 9.651563 | 1151.512 | 9.651563 | 1151.512 | 9.651563 | 1151.512 | 9.651563 |
| 9.84     | 1152.51 | 9.66     | 1151.498 | 9.66     | 1151.498 | 9.66     | 1151.498 | 9.66     |
| 9.847109 | 1152.51 | 9.661563 | 1151.495 | 9.661563 | 1151.495 | 9.661563 | 1151.495 | 9.661563 |

|          |          |          |          |          |          |          |          |          |
|----------|----------|----------|----------|----------|----------|----------|----------|----------|
| 9.85     | 1152.51  | 9.67     | 1151.481 | 9.67     | 1151.481 | 9.67     | 1151.481 | 9.67     |
| 9.857109 | 1152.51  | 9.671563 | 1151.479 | 9.671563 | 1151.478 | 9.671563 | 1151.478 | 9.671563 |
| 9.86     | 1152.51  | 9.68     | 1151.465 | 9.68     | 1151.465 | 9.68     | 1151.465 | 9.68     |
| 9.867109 | 1152.51  | 9.681563 | 1151.462 | 9.681563 | 1151.462 | 9.681563 | 1151.462 | 9.681563 |
| 9.87     | 1152.51  | 9.69     | 1151.448 | 9.69     | 1151.448 | 9.69     | 1151.448 | 9.69     |
| 9.877109 | 1152.51  | 9.691563 | 1151.446 | 9.691563 | 1151.445 | 9.691563 | 1151.445 | 9.691563 |
| 9.88     | 1152.51  | 9.7      | 1151.432 | 9.7      | 1151.431 | 9.7      | 1151.431 | 9.7      |
| 9.887109 | 1152.51  | 9.701563 | 1151.429 | 9.701563 | 1151.429 | 9.701563 | 1151.429 | 9.701563 |
| 9.89     | 1152.51  | 9.71     | 1151.415 | 9.71     | 1151.415 | 9.71     | 1151.415 | 9.71     |
| 9.897109 | 1152.51  | 9.711563 | 1151.413 | 9.711563 | 1151.412 | 9.711563 | 1151.412 | 9.711563 |
| 9.898439 | 1152.51  | 9.72     | 1151.399 | 9.72     | 1151.398 | 9.72     | 1151.398 | 9.72     |
| 9.899654 | 1152.51  | 9.721563 | 1151.396 | 9.721563 | 1151.396 | 9.721563 | 1151.396 | 9.721563 |
| 9.900669 | 1152.51  | 9.73     | 1151.382 | 9.73     | 1151.382 | 9.73     | 1151.382 | 9.73     |
| 9.901793 | 1152.51  | 9.731563 | 1151.379 | 9.731563 | 1151.379 | 9.731563 | 1151.379 | 9.731563 |
| 9.903708 | 1152.51  | 9.74     | 1151.366 | 9.74     | 1151.365 | 9.74     | 1151.365 | 9.74     |
| 9.904732 | 1152.51  | 9.741563 | 1151.363 | 9.741563 | 1151.363 | 9.741563 | 1151.363 | 9.741563 |
| 9.905755 | 1152.51  | 9.75     | 1151.349 | 9.75     | 1151.349 | 9.75     | 1151.349 | 9.75     |
| 9.906778 | 1152.51  | 9.751563 | 1151.346 | 9.751563 | 1151.346 | 9.751563 | 1151.346 | 9.751563 |
| 9.908415 | 1152.51  | 9.76     | 1151.332 | 9.76     | 1151.332 | 9.76     | 1151.332 | 9.76     |
| 9.91     | 1152.51  | 9.761563 | 1151.33  | 9.761563 | 1151.33  | 9.761563 | 1151.33  | 9.761563 |
| 9.911214 | 1152.51  | 9.77     | 1151.316 | 9.77     | 1151.316 | 9.77     | 1151.316 | 9.77     |
| 9.913124 | 1152.51  | 9.771563 | 1151.313 | 9.771563 | 1151.313 | 9.771563 | 1151.313 | 9.771563 |
| 9.914206 | 1152.51  | 9.78     | 1151.299 | 9.78     | 1151.299 | 9.78     | 1151.299 | 9.78     |
| 9.915288 | 1152.51  | 9.781563 | 1151.297 | 9.781563 | 1151.297 | 9.781563 | 1151.297 | 9.781563 |
| 9.91637  | 1152.51  | 9.79     | 1151.283 | 9.79     | 1151.283 | 9.79     | 1151.283 | 9.79     |
| 9.917453 | 1152.51  | 9.791563 | 1151.28  | 9.791563 | 1151.28  | 9.791563 | 1151.28  | 9.791563 |
| 9.92     | 1152.51  | 9.8      | 1151.266 | 9.8      | 1151.266 | 9.8      | 1151.266 | 9.8      |
| 9.92133  | 1152.51  | 9.801563 | 1151.264 | 9.801563 | 1151.264 | 9.801563 | 1151.264 | 9.801563 |
| 9.922558 | 1152.51  | 9.81     | 1151.25  | 9.81     | 1151.25  | 9.81     | 1151.25  | 9.81     |
| 9.923991 | 1152.51  | 9.811563 | 1151.247 | 9.811563 | 1151.247 | 9.811563 | 1151.247 | 9.811563 |
| 9.925245 | 1152.51  | 9.82     | 1151.233 | 9.82     | 1151.233 | 9.82     | 1151.233 | 9.82     |
| 9.926659 | 1152.51  | 9.821563 | 1151.231 | 9.821563 | 1151.231 | 9.821563 | 1151.231 | 9.821563 |
| 9.928074 | 1152.51  | 9.83     | 1151.217 | 9.83     | 1151.217 | 9.83     | 1151.217 | 9.83     |
| 9.929075 | 1152.51  | 9.831563 | 1151.214 | 9.831563 | 1151.214 | 9.831563 | 1151.214 | 9.831563 |
| 9.930128 | 1152.51  | 9.84     | 1151.2   | 9.84     | 1151.2   | 9.84     | 1151.2   | 9.84     |
| 9.93114  | 1152.511 | 9.841563 | 1151.198 | 9.841563 | 1151.197 | 9.841563 | 1151.197 | 9.841563 |
| 9.932164 | 1152.511 | 9.85     | 1151.184 | 9.85     | 1151.184 | 9.85     | 1151.184 | 9.85     |
| 9.933299 | 1152.51  | 9.851563 | 1151.181 | 9.851563 | 1151.181 | 9.851563 | 1151.181 | 9.851563 |
| 9.934426 | 1152.509 | 9.86     | 1151.167 | 9.86     | 1151.167 | 9.86     | 1151.167 | 9.86     |
| 9.935862 | 1152.509 | 9.861563 | 1151.165 | 9.861563 | 1151.164 | 9.861563 | 1151.164 | 9.861563 |
| 9.937297 | 1152.51  | 9.87     | 1151.151 | 9.87     | 1151.15  | 9.87     | 1151.15  | 9.87     |
| 9.938732 | 1152.509 | 9.871563 | 1151.148 | 9.871563 | 1151.148 | 9.871563 | 1151.148 | 9.871563 |
| 9.94     | 1152.506 | 9.88     | 1151.134 | 9.88     | 1151.134 | 9.88     | 1151.134 | 9.88     |
| 9.941175 | 1152.505 | 9.881563 | 1151.132 | 9.881563 | 1151.131 | 9.881563 | 1151.131 | 9.881563 |
| 9.942366 | 1152.504 | 9.89     | 1151.118 | 9.89     | 1151.117 | 9.89     | 1151.117 | 9.89     |
| 9.943556 | 1152.503 | 9.891563 | 1151.115 | 9.891563 | 1151.115 | 9.891563 | 1151.115 | 9.891563 |
| 9.944747 | 1152.502 | 9.9      | 1151.101 | 9.9      | 1151.101 | 9.9      | 1151.101 | 9.9      |

|          |          |          |          |          |          |          |          |          |
|----------|----------|----------|----------|----------|----------|----------|----------|----------|
| 9.945788 | 1152.501 | 9.901563 | 1151.098 | 9.901563 | 1151.098 | 9.901563 | 1151.098 | 9.901563 |
| 9.94683  | 1152.499 | 9.91     | 1151.085 | 9.91     | 1151.084 | 9.91     | 1151.084 | 9.91     |
| 9.947872 | 1152.498 | 9.911563 | 1151.082 | 9.911563 | 1151.082 | 9.911563 | 1151.082 | 9.911563 |
| 9.948913 | 1152.497 | 9.92     | 1151.068 | 9.92     | 1151.068 | 9.92     | 1151.068 | 9.92     |
| 9.95     | 1152.496 | 9.921563 | 1151.065 | 9.921563 | 1151.065 | 9.921563 | 1151.065 | 9.921563 |
| 9.951408 | 1152.494 | 9.93     | 1151.051 | 9.93     | 1151.051 | 9.93     | 1151.051 | 9.93     |
| 9.952603 | 1152.492 | 9.931563 | 1151.049 | 9.931563 | 1151.049 | 9.931563 | 1151.049 | 9.931563 |
| 9.954245 | 1152.49  | 9.94     | 1151.035 | 9.94     | 1151.035 | 9.94     | 1151.035 | 9.94     |
| 9.95529  | 1152.488 | 9.941563 | 1151.032 | 9.941563 | 1151.032 | 9.941563 | 1151.032 | 9.941563 |
| 9.956335 | 1152.487 | 9.95     | 1151.018 | 9.95     | 1151.018 | 9.95     | 1151.018 | 9.95     |
| 9.958164 | 1152.484 | 9.951563 | 1151.016 | 9.951563 | 1151.016 | 9.951563 | 1151.016 | 9.951563 |
| 9.959993 | 1152.481 | 9.96     | 1151.002 | 9.96     | 1151.002 | 9.96     | 1151.002 | 9.96     |
| 9.961224 | 1152.479 | 9.961563 | 1150.999 | 9.961563 | 1150.999 | 9.961563 | 1150.999 | 9.961563 |
| 9.962379 | 1152.478 | 9.97     | 1150.985 | 9.97     | 1150.985 | 9.97     | 1150.985 | 9.97     |
| 9.964251 | 1152.475 | 9.971563 | 1150.983 | 9.971563 | 1150.983 | 9.971563 | 1150.983 | 9.971563 |
| 9.965998 | 1152.472 | 9.98     | 1150.969 | 9.98     | 1150.969 | 9.98     | 1150.969 | 9.98     |
| 9.967527 | 1152.47  | 9.981563 | 1150.966 | 9.981563 | 1150.966 | 9.981563 | 1150.966 | 9.981563 |
| 9.97     | 1152.466 | 9.99     | 1150.952 | 9.99     | 1150.952 | 9.99     | 1150.952 | 9.99     |
| 9.971018 | 1152.464 | 9.991563 | 1150.95  | 9.991563 | 1150.949 | 9.991563 | 1150.949 | 9.991563 |
| 9.972062 | 1152.463 | 9.993672 | 1150.946 | 9.993673 | 1150.946 | 9.993673 | 1150.946 | 9.993673 |
| 9.975435 | 1152.457 | 9.995254 | 1150.944 | 9.995254 | 1150.943 | 9.995254 | 1150.943 | 9.995254 |
| 9.98     | 1152.45  | 9.998023 | 1150.939 | 9.998023 | 1150.939 | 9.998023 | 1150.939 | 9.998023 |
| 9.983314 | 1152.445 | 9.999135 | 1150.937 | 9.999135 | 1150.937 | 9.999135 | 1150.937 | 9.999135 |
| 9.99     | 1152.434 | 10.00025 | 1150.935 | 10.00025 | 1150.935 | 10.00025 | 1150.935 | 10.00025 |
| 9.993314 | 1152.429 | 10.00138 | 1150.933 | 10.00138 | 1150.933 | 10.00138 | 1150.933 | 10.00138 |
| 9.994985 | 1152.427 | 10.0027  | 1150.931 | 10.0027  | 1150.931 | 10.0027  | 1150.931 | 10.0027  |
| 9.996239 | 1152.425 | 10.00424 | 1150.929 | 10.00424 | 1150.929 | 10.00424 | 1150.929 | 10.00424 |
| 9.998433 | 1152.421 | 10.00558 | 1150.926 | 10.00558 | 1150.926 | 10.00558 | 1150.926 | 10.00558 |
| 9.99958  | 1152.419 | 10.00674 | 1150.925 | 10.00674 | 1150.924 | 10.00674 | 1150.924 | 10.00674 |
| 10.00072 | 1152.418 | 10.00791 | 1150.923 | 10.00791 | 1150.922 | 10.00791 | 1150.922 | 10.00791 |
| 10.00191 | 1152.416 | 10.00907 | 1150.921 | 10.00907 | 1150.921 | 10.00907 | 1150.921 | 10.00907 |
| 10.00355 | 1152.413 | 10.01009 | 1150.919 | 10.01009 | 1150.919 | 10.01009 | 1150.919 | 10.01009 |
| 10.00566 | 1152.41  | 10.01155 | 1150.917 | 10.01155 | 1150.916 | 10.01155 | 1150.916 | 10.01155 |
| 10.00683 | 1152.408 | 10.01336 | 1150.914 | 10.01336 | 1150.913 | 10.01336 | 1150.913 | 10.01336 |
| 10.008   | 1152.406 | 10.01505 | 1150.911 | 10.01505 | 1150.911 | 10.01505 | 1150.911 | 10.01505 |
| 10.00917 | 1152.404 | 10.01819 | 1150.906 | 10.01819 | 1150.905 | 10.01819 | 1150.905 | 10.01819 |
| 10.01017 | 1152.403 | 10.02    | 1150.903 | 10.02    | 1150.902 | 10.02    | 1150.902 | 10.02    |
| 10.01157 | 1152.4   | 10.02109 | 1150.901 | 10.02109 | 1150.901 | 10.02109 | 1150.901 | 10.02109 |
| 10.01338 | 1152.398 | 10.02262 | 1150.898 | 10.02262 | 1150.898 | 10.02262 | 1150.898 | 10.02262 |
| 10.01508 | 1152.395 | 10.02387 | 1150.896 | 10.02387 | 1150.896 | 10.02387 | 1150.896 | 10.02387 |
| 10.01822 | 1152.39  | 10.02499 | 1150.894 | 10.02499 | 1150.894 | 10.02499 | 1150.894 | 10.02499 |
| 10.02    | 1152.387 | 10.02611 | 1150.893 | 10.02611 | 1150.892 | 10.02611 | 1150.892 | 10.02611 |
| 10.02109 | 1152.385 | 10.02723 | 1150.891 | 10.02723 | 1150.89  | 10.02723 | 1150.89  | 10.02723 |
| 10.02262 | 1152.383 | 10.02836 | 1150.889 | 10.02836 | 1150.889 | 10.02836 | 1150.889 | 10.02836 |
| 10.02386 | 1152.381 | 10.02941 | 1150.887 | 10.02941 | 1150.887 | 10.02941 | 1150.887 | 10.02941 |
| 10.02498 | 1152.379 | 10.03042 | 1150.885 | 10.03042 | 1150.885 | 10.03042 | 1150.885 | 10.03041 |
| 10.02611 | 1152.377 | 10.03153 | 1150.883 | 10.03153 | 1150.883 | 10.03153 | 1150.883 | 10.03166 |



|          |          |          |          |          |          |          |          |          |
|----------|----------|----------|----------|----------|----------|----------|----------|----------|
| 10.02723 | 1152.376 | 10.03277 | 1150.881 | 10.03277 | 1150.88  | 10.03277 | 1150.88  | 10.03286 |
| 10.02835 | 1152.374 | 10.03406 | 1150.877 | 10.03406 | 1150.877 | 10.03406 | 1150.877 | 10.03419 |
| 10.02938 | 1152.372 | 10.03527 | 1150.874 | 10.03527 | 1150.873 | 10.03527 | 1150.873 | 10.0354  |
| 10.0304  | 1152.37  | 10.03648 | 1150.87  | 10.03648 | 1150.869 | 10.03648 | 1150.869 | 10.03675 |
| 10.03141 | 1152.369 | 10.03769 | 1150.865 | 10.03769 | 1150.865 | 10.03769 | 1150.865 | 10.03809 |
| 10.03251 | 1152.366 | 10.0389  | 1150.86  | 10.0389  | 1150.86  | 10.0389  | 1150.86  | 10.03944 |
| 10.03384 | 1152.363 | 10.04    | 1150.854 | 10.04    | 1150.854 | 10.04    | 1150.854 | 10.04074 |
| 10.03529 | 1152.359 | 10.04123 | 1150.848 | 10.04123 | 1150.848 | 10.04123 | 1150.848 | 10.04191 |
| 10.03644 | 1152.355 | 10.04246 | 1150.841 | 10.04246 | 1150.841 | 10.04246 | 1150.841 | 10.04312 |
| 10.03759 | 1152.351 | 10.04363 | 1150.835 | 10.04363 | 1150.835 | 10.04363 | 1150.835 | 10.0442  |
| 10.03873 | 1152.346 | 10.04494 | 1150.827 | 10.04494 | 1150.827 | 10.04494 | 1150.827 | 10.04559 |
| 10.03988 | 1152.341 | 10.04603 | 1150.821 | 10.04603 | 1150.82  | 10.04603 | 1150.82  | 10.04707 |
| 10.04104 | 1152.334 | 10.04712 | 1150.813 | 10.04712 | 1150.813 | 10.04712 | 1150.813 | 10.0481  |
| 10.04219 | 1152.328 | 10.04835 | 1150.805 | 10.04835 | 1150.805 | 10.04835 | 1150.805 | 10.04939 |
| 10.04325 | 1152.323 | 10.04971 | 1150.796 | 10.04971 | 1150.796 | 10.04971 | 1150.796 | 10.05041 |
| 10.04436 | 1152.316 | 10.05078 | 1150.789 | 10.05078 | 1150.789 | 10.05078 | 1150.789 | 10.05142 |
| 10.04579 | 1152.308 | 10.05227 | 1150.778 | 10.05227 | 1150.778 | 10.05227 | 1150.778 | 10.05287 |
| 10.04729 | 1152.298 | 10.05336 | 1150.77  | 10.05336 | 1150.77  | 10.05336 | 1150.77  | 10.054   |
| 10.04833 | 1152.291 | 10.05462 | 1150.761 | 10.05462 | 1150.76  | 10.05462 | 1150.76  | 10.05584 |
| 10.04963 | 1152.283 | 10.05605 | 1150.75  | 10.05605 | 1150.75  | 10.05605 | 1150.75  | 10.05729 |
| 10.05078 | 1152.275 | 10.05733 | 1150.74  | 10.05733 | 1150.74  | 10.05733 | 1150.74  | 10.05867 |
| 10.05233 | 1152.264 | 10.05861 | 1150.73  | 10.05861 | 1150.73  | 10.05861 | 1150.73  | 10.06    |
| 10.05348 | 1152.255 | 10.0599  | 1150.721 | 10.0599  | 1150.721 | 10.0599  | 1150.721 | 10.06105 |
| 10.05505 | 1152.243 | 10.06099 | 1150.713 | 10.06099 | 1150.712 | 10.06099 | 1150.712 | 10.06235 |
| 10.05672 | 1152.231 | 10.06216 | 1150.704 | 10.06216 | 1150.704 | 10.06216 | 1150.704 | 10.06389 |
| 10.05814 | 1152.22  | 10.06337 | 1150.694 | 10.06337 | 1150.694 | 10.06337 | 1150.694 | 10.06518 |
| 10.05957 | 1152.209 | 10.06448 | 1150.686 | 10.06448 | 1150.685 | 10.06448 | 1150.685 | 10.0664  |
| 10.06084 | 1152.2   | 10.06559 | 1150.677 | 10.06559 | 1150.677 | 10.06559 | 1150.677 | 10.06747 |
| 10.06201 | 1152.191 | 10.06669 | 1150.668 | 10.06669 | 1150.668 | 10.06669 | 1150.668 | 10.06848 |
| 10.0633  | 1152.181 | 10.06819 | 1150.655 | 10.06819 | 1150.655 | 10.06819 | 1150.655 | 10.06949 |
| 10.06473 | 1152.17  | 10.06969 | 1150.643 | 10.06969 | 1150.643 | 10.06969 | 1150.643 | 10.07071 |
| 10.06609 | 1152.159 | 10.07076 | 1150.634 | 10.07076 | 1150.634 | 10.07076 | 1150.634 | 10.07172 |
| 10.0673  | 1152.149 | 10.0718  | 1150.625 | 10.0718  | 1150.625 | 10.0718  | 1150.625 | 10.07293 |
| 10.06838 | 1152.14  | 10.07297 | 1150.615 | 10.07297 | 1150.615 | 10.07297 | 1150.615 | 10.07396 |
| 10.06947 | 1152.131 | 10.07415 | 1150.605 | 10.07415 | 1150.605 | 10.07415 | 1150.605 | 10.07535 |
| 10.07056 | 1152.122 | 10.07577 | 1150.591 | 10.07577 | 1150.591 | 10.07577 | 1150.591 | 10.07642 |
| 10.07169 | 1152.112 | 10.07702 | 1150.58  | 10.07702 | 1150.58  | 10.07702 | 1150.58  | 10.07773 |
| 10.0727  | 1152.104 | 10.07828 | 1150.569 | 10.07828 | 1150.569 | 10.07828 | 1150.569 | 10.07882 |
| 10.07391 | 1152.094 | 10.07954 | 1150.558 | 10.07954 | 1150.558 | 10.07954 | 1150.558 | 10.08    |
| 10.07511 | 1152.083 | 10.08066 | 1150.549 | 10.08066 | 1150.548 | 10.08066 | 1150.548 | 10.08106 |
| 10.07611 | 1152.075 | 10.08184 | 1150.538 | 10.08184 | 1150.538 | 10.08184 | 1150.538 | 10.08229 |
| 10.07719 | 1152.065 | 10.08309 | 1150.527 | 10.08309 | 1150.527 | 10.08309 | 1150.527 | 10.08398 |
| 10.07827 | 1152.056 | 10.08417 | 1150.518 | 10.08417 | 1150.518 | 10.08417 | 1150.518 | 10.08506 |
| 10.07947 | 1152.046 | 10.08526 | 1150.508 | 10.08526 | 1150.508 | 10.08526 | 1150.508 | 10.08694 |
| 10.08097 | 1152.033 | 10.08716 | 1150.492 | 10.08716 | 1150.492 | 10.08716 | 1150.492 | 10.09    |
| 10.0821  | 1152.023 | 10.09    | 1150.468 | 10.09    | 1150.468 | 10.09    | 1150.467 | 10.09108 |
| 10.08323 | 1152.013 | 10.09109 | 1150.458 | 10.09109 | 1150.458 | 10.09109 | 1150.458 | 10.09279 |

|          |          |          |          |          |          |          |          |          |
|----------|----------|----------|----------|----------|----------|----------|----------|----------|
| 10.08456 | 1152.001 | 10.0928  | 1150.444 | 10.0928  | 1150.443 | 10.0928  | 1150.443 | 10.09439 |
| 10.0859  | 1151.99  | 10.0944  | 1150.43  | 10.0944  | 1150.43  | 10.0944  | 1150.43  | 10.09579 |
| 10.08723 | 1151.978 | 10.0958  | 1150.418 | 10.0958  | 1150.417 | 10.0958  | 1150.417 | 10.09719 |
| 10.09    | 1151.955 | 10.0972  | 1150.405 | 10.0972  | 1150.405 | 10.0972  | 1150.405 | 10.09859 |
| 10.09172 | 1151.94  | 10.0986  | 1150.393 | 10.0986  | 1150.393 | 10.0986  | 1150.393 | 10.1     |
| 10.09318 | 1151.928 | 10.1     | 1150.381 | 10.1     | 1150.381 | 10.1     | 1150.381 | 10.10172 |
| 10.09517 | 1151.91  | 10.10172 | 1150.366 | 10.10172 | 1150.365 | 10.10172 | 1150.365 | 10.10316 |
| 10.09645 | 1151.899 | 10.10316 | 1150.353 | 10.10316 | 1150.353 | 10.10316 | 1150.353 | 10.10514 |
| 10.09867 | 1151.88  | 10.10514 | 1150.336 | 10.10514 | 1150.335 | 10.10514 | 1150.335 | 10.1064  |
| 10.1     | 1151.868 | 10.1064  | 1150.324 | 10.1064  | 1150.324 | 10.1064  | 1150.324 | 10.10766 |
| 10.10115 | 1151.858 | 10.10766 | 1150.313 | 10.10766 | 1150.313 | 10.10766 | 1150.313 | 10.10986 |
| 10.10261 | 1151.845 | 10.10986 | 1150.294 | 10.10986 | 1150.294 | 10.10986 | 1150.294 | 10.11109 |
| 10.10414 | 1151.832 | 10.11109 | 1150.283 | 10.11109 | 1150.283 | 10.11109 | 1150.283 | 10.11244 |
| 10.10624 | 1151.813 | 10.11244 | 1150.271 | 10.11244 | 1150.271 | 10.11244 | 1150.271 | 10.11381 |
| 10.10757 | 1151.802 | 10.11381 | 1150.259 | 10.11381 | 1150.259 | 10.11381 | 1150.259 | 10.11571 |
| 10.10891 | 1151.79  | 10.11571 | 1150.243 | 10.11571 | 1150.243 | 10.11571 | 1150.243 | 10.11691 |
| 10.11    | 1151.78  | 10.11691 | 1150.232 | 10.11691 | 1150.232 | 10.11691 | 1150.232 | 10.11812 |
| 10.11158 | 1151.766 | 10.11812 | 1150.222 | 10.11812 | 1150.222 | 10.11812 | 1150.222 | 10.12    |
| 10.11291 | 1151.755 | 10.12    | 1150.206 | 10.12    | 1150.205 | 10.12    | 1150.205 | 10.1214  |
| 10.11472 | 1151.739 | 10.1214  | 1150.193 | 10.1214  | 1150.193 | 10.1214  | 1150.193 | 10.12256 |
| 10.11588 | 1151.729 | 10.12256 | 1150.183 | 10.12256 | 1150.183 | 10.12256 | 1150.183 | 10.12416 |
| 10.11704 | 1151.719 | 10.12416 | 1150.169 | 10.12416 | 1150.169 | 10.12416 | 1150.169 | 10.12518 |
| 10.11906 | 1151.702 | 10.12518 | 1150.161 | 10.12518 | 1150.16  | 10.12518 | 1150.16  | 10.1262  |
| 10.12029 | 1151.691 | 10.1262  | 1150.152 | 10.1262  | 1150.151 | 10.1262  | 1150.151 | 10.12798 |
| 10.12141 | 1151.681 | 10.12798 | 1150.136 | 10.12798 | 1150.136 | 10.12798 | 1150.136 | 10.13    |
| 10.12277 | 1151.669 | 10.13    | 1150.118 | 10.13    | 1150.118 | 10.13    | 1150.118 | 10.13122 |
| 10.12397 | 1151.659 | 10.13122 | 1150.108 | 10.13122 | 1150.107 | 10.13122 | 1150.107 | 10.1324  |
| 10.12502 | 1151.65  | 10.1324  | 1150.097 | 10.1324  | 1150.097 | 10.1324  | 1150.097 | 10.13344 |
| 10.12607 | 1151.641 | 10.13344 | 1150.088 | 10.13344 | 1150.088 | 10.13344 | 1150.088 | 10.13525 |
| 10.12711 | 1151.632 | 10.13525 | 1150.072 | 10.13525 | 1150.072 | 10.13525 | 1150.072 | 10.13632 |
| 10.12895 | 1151.615 | 10.13632 | 1150.063 | 10.13632 | 1150.063 | 10.13632 | 1150.063 | 10.13751 |
| 10.13    | 1151.606 | 10.13865 | 1150.042 | 10.13865 | 1150.042 | 10.13865 | 1150.042 | 10.13999 |
| 10.13124 | 1151.595 | 10.13999 | 1150.031 | 10.13999 | 1150.03  | 10.13999 | 1150.03  | 10.14194 |
| 10.13242 | 1151.585 | 10.14153 | 1150.017 | 10.14153 | 1150.017 | 10.14153 | 1150.017 | 10.14363 |
| 10.13346 | 1151.576 | 10.1429  | 1150.005 | 10.1429  | 1150.005 | 10.1429  | 1150.005 | 10.14516 |
| 10.13527 | 1151.56  | 10.14426 | 1149.993 | 10.14426 | 1149.993 | 10.14426 | 1149.993 | 10.14669 |
| 10.13632 | 1151.551 | 10.14563 | 1149.981 | 10.14563 | 1149.981 | 10.14563 | 1149.981 | 10.14821 |
| 10.13732 | 1151.542 | 10.15    | 1149.943 | 10.15    | 1149.943 | 10.15    | 1149.943 | 10.15    |
| 10.13927 | 1151.525 | 10.15156 | 1149.93  | 10.15156 | 1149.929 | 10.15156 | 1149.929 | 10.15174 |
| 10.14166 | 1151.504 | 10.15305 | 1149.917 | 10.15305 | 1149.916 | 10.15305 | 1149.916 | 10.15324 |
| 10.14301 | 1151.493 | 10.15453 | 1149.904 | 10.15453 | 1149.903 | 10.15453 | 1149.903 | 10.15474 |
| 10.14437 | 1151.481 | 10.15602 | 1149.891 | 10.15602 | 1149.89  | 10.15602 | 1149.89  | 10.15623 |
| 10.14573 | 1151.469 | 10.16    | 1149.856 | 10.16    | 1149.855 | 10.16    | 1149.855 | 10.16    |
| 10.15    | 1151.432 | 10.1617  | 1149.841 | 10.1617  | 1149.841 | 10.1617  | 1149.84  | 10.16171 |
| 10.15155 | 1151.418 | 10.16331 | 1149.827 | 10.16331 | 1149.826 | 10.16331 | 1149.826 | 10.16332 |
| 10.15302 | 1151.405 | 10.16492 | 1149.812 | 10.16492 | 1149.812 | 10.16492 | 1149.812 | 10.16493 |
| 10.15448 | 1151.393 | 10.16653 | 1149.798 | 10.16653 | 1149.798 | 10.16653 | 1149.798 | 10.16654 |

|          |          |          |          |          |          |          |          |          |
|----------|----------|----------|----------|----------|----------|----------|----------|----------|
| 10.15595 | 1151.38  | 10.17    | 1149.768 | 10.17    | 1149.768 | 10.17    | 1149.768 | 10.17    |
| 10.16    | 1151.344 | 10.17184 | 1149.752 | 10.17184 | 1149.752 | 10.17184 | 1149.752 | 10.17184 |
| 10.16167 | 1151.33  | 10.17358 | 1149.737 | 10.17358 | 1149.736 | 10.17358 | 1149.736 | 10.17358 |
| 10.16326 | 1151.316 | 10.17531 | 1149.721 | 10.17531 | 1149.721 | 10.17531 | 1149.721 | 10.17532 |
| 10.16484 | 1151.302 | 10.1773  | 1149.704 | 10.17727 | 1149.704 | 10.17727 | 1149.704 | 10.17725 |
| 10.16643 | 1151.288 | 10.17842 | 1149.693 | 10.17838 | 1149.694 | 10.17838 | 1149.694 | 10.17837 |
| 10.17    | 1151.257 | 10.17953 | 1149.682 | 10.1795  | 1149.683 | 10.17949 | 1149.683 | 10.17949 |
| 10.17181 | 1151.241 | 10.18127 | 1149.664 | 10.18127 | 1149.664 | 10.18127 | 1149.664 | 10.18128 |
| 10.17352 | 1151.226 | 10.1823  | 1149.651 | 10.18229 | 1149.651 | 10.18229 | 1149.651 | 10.1823  |
| 10.17523 | 1151.211 | 10.18332 | 1149.636 | 10.18332 | 1149.636 | 10.18332 | 1149.636 | 10.18332 |
| 10.17693 | 1151.196 | 10.18434 | 1149.62  | 10.18434 | 1149.62  | 10.18434 | 1149.62  | 10.18434 |
| 10.18    | 1151.17  | 10.18792 | 1149.553 | 10.18792 | 1149.553 | 10.18792 | 1149.553 | 10.18792 |
| 10.18195 | 1151.153 | 10.19    | 1149.508 | 10.19    | 1149.508 | 10.19    | 1149.508 | 10.19    |
| 10.18378 | 1151.137 | 10.19171 | 1149.468 | 10.19171 | 1149.468 | 10.19171 | 1149.468 | 10.19171 |
| 10.18561 | 1151.121 | 10.1938  | 1149.417 | 10.1938  | 1149.416 | 10.1938  | 1149.416 | 10.1938  |
| 10.18743 | 1151.105 | 10.1948  | 1149.391 | 10.1948  | 1149.391 | 10.1948  | 1149.391 | 10.1958  |
| 10.19    | 1151.082 | 10.1958  | 1149.366 | 10.1958  | 1149.365 | 10.1958  | 1149.365 | 10.19855 |
| 10.19209 | 1151.064 | 10.1968  | 1149.339 | 10.1968  | 1149.339 | 10.1968  | 1149.339 | 10.2     |
| 10.19404 | 1151.047 | 10.19856 | 1149.291 | 10.19855 | 1149.291 | 10.19855 | 1149.291 | 10.20114 |
| 10.19599 | 1151.03  | 10.2     | 1149.249 | 10.2     | 1149.249 | 10.2     | 1149.249 | 10.20302 |
| 10.19794 | 1151.013 | 10.20114 | 1149.215 | 10.20114 | 1149.214 | 10.20114 | 1149.214 | 10.20481 |
| 10.2     | 1150.995 | 10.20303 | 1149.154 | 10.20302 | 1149.153 | 10.20302 | 1149.153 | 10.20637 |
| 10.20223 | 1150.975 | 10.20481 | 1149.092 | 10.20481 | 1149.091 | 10.20481 | 1149.091 | 10.20793 |
| 10.2043  | 1150.957 | 10.20637 | 1149.036 | 10.20637 | 1149.035 | 10.20637 | 1149.035 | 10.2095  |
| 10.20637 | 1150.939 | 10.20794 | 1148.978 | 10.20793 | 1148.977 | 10.20793 | 1148.977 | 10.21054 |
| 10.20844 | 1150.921 | 10.2095  | 1148.917 | 10.2095  | 1148.917 | 10.2095  | 1148.916 | 10.21204 |
| 10.21    | 1150.907 | 10.21054 | 1148.876 | 10.21054 | 1148.875 | 10.21054 | 1148.875 | 10.21376 |
| 10.21237 | 1150.887 | 10.21204 | 1148.814 | 10.21204 | 1148.814 | 10.21204 | 1148.814 | 10.21613 |
| 10.21456 | 1150.867 | 10.21376 | 1148.742 | 10.21376 | 1148.741 | 10.21376 | 1148.741 | 10.21764 |
| 10.21675 | 1150.848 | 10.21613 | 1148.639 | 10.21613 | 1148.638 | 10.21613 | 1148.638 | 10.22    |
| 10.21894 | 1150.829 | 10.21764 | 1148.571 | 10.21764 | 1148.57  | 10.21764 | 1148.57  | 10.22108 |
| 10.22    | 1150.82  | 10.22    | 1148.459 | 10.22    | 1148.459 | 10.22    | 1148.459 | 10.223   |
| 10.2225  | 1150.798 | 10.22108 | 1148.407 | 10.22108 | 1148.406 | 10.22108 | 1148.406 | 10.22565 |
| 10.22482 | 1150.778 | 10.223   | 1148.309 | 10.223   | 1148.308 | 10.223   | 1148.308 | 10.22733 |
| 10.22713 | 1150.757 | 10.22565 | 1148.169 | 10.22565 | 1148.169 | 10.22565 | 1148.168 | 10.22901 |
| 10.22944 | 1150.737 | 10.22733 | 1148.078 | 10.22733 | 1148.077 | 10.22733 | 1148.077 | 10.23024 |
| 10.23264 | 1150.709 | 10.22901 | 1147.984 | 10.22901 | 1147.983 | 10.22901 | 1147.983 | 10.2322  |
| 10.23507 | 1150.688 | 10.23024 | 1147.914 | 10.23024 | 1147.913 | 10.23024 | 1147.913 | 10.23405 |
| 10.23751 | 1150.667 | 10.23219 | 1147.8   | 10.2322  | 1147.799 | 10.2322  | 1147.798 | 10.2366  |
| 10.23994 | 1150.645 | 10.23405 | 1147.688 | 10.23405 | 1147.687 | 10.23405 | 1147.687 | 10.23822 |
| 10.24278 | 1150.62  | 10.2366  | 1147.529 | 10.2366  | 1147.528 | 10.2366  | 1147.528 | 10.24    |
| 10.24533 | 1150.598 | 10.23822 | 1147.426 | 10.23822 | 1147.425 | 10.23822 | 1147.425 | 10.24119 |
| 10.24788 | 1150.576 | 10.24    | 1147.309 | 10.24    | 1147.308 | 10.24    | 1147.308 | 10.24225 |
| 10.25    | 1150.557 | 10.24119 | 1147.23  | 10.24119 | 1147.229 | 10.24119 | 1147.228 | 10.24331 |
| 10.25292 | 1150.532 | 10.24225 | 1147.157 | 10.24225 | 1147.156 | 10.24225 | 1147.156 | 10.24437 |
| 10.25559 | 1150.508 | 10.24331 | 1147.083 | 10.24331 | 1147.082 | 10.24331 | 1147.082 | 10.24623 |
| 10.25826 | 1150.485 | 10.24437 | 1147.009 | 10.24437 | 1147.008 | 10.24437 | 1147.007 | 10.24809 |

|          |          |          |          |          |          |          |          |          |
|----------|----------|----------|----------|----------|----------|----------|----------|----------|
| 10.26    | 1150.47  | 10.24623 | 1146.876 | 10.24623 | 1146.875 | 10.24623 | 1146.875 | 10.24995 |
| 10.26305 | 1150.443 | 10.24809 | 1146.741 | 10.24809 | 1146.74  | 10.24809 | 1146.74  | 10.25131 |
| 10.26585 | 1150.418 | 10.24995 | 1146.603 | 10.24995 | 1146.602 | 10.24995 | 1146.602 | 10.25248 |
| 10.26864 | 1150.394 | 10.25131 | 1146.5   | 10.25131 | 1146.498 | 10.25131 | 1146.498 | 10.25365 |
| 10.27    | 1150.382 | 10.25248 | 1146.41  | 10.25248 | 1146.408 | 10.25248 | 1146.408 | 10.25482 |
| 10.27319 | 1150.354 | 10.25365 | 1146.318 | 10.25365 | 1146.317 | 10.25365 | 1146.317 | 10.25686 |
| 10.2761  | 1150.328 | 10.25481 | 1146.225 | 10.25482 | 1146.224 | 10.25482 | 1146.224 | 10.2589  |
| 10.27901 | 1150.303 | 10.25686 | 1146.061 | 10.25686 | 1146.059 | 10.25686 | 1146.059 | 10.26    |
| 10.28042 | 1150.291 | 10.2589  | 1145.893 | 10.2589  | 1145.891 | 10.2589  | 1145.891 | 10.26143 |
| 10.28333 | 1150.265 | 10.26    | 1145.801 | 10.26    | 1145.799 | 10.26    | 1145.799 | 10.2627  |
| 10.28636 | 1150.239 | 10.26143 | 1145.679 | 10.26143 | 1145.678 | 10.26143 | 1145.677 | 10.26385 |
| 10.28939 | 1150.212 | 10.2627  | 1145.569 | 10.2627  | 1145.568 | 10.2627  | 1145.568 | 10.26499 |
| 10.29043 | 1150.203 | 10.26385 | 1145.469 | 10.26385 | 1145.468 | 10.26385 | 1145.467 | 10.26613 |
| 10.29346 | 1150.176 | 10.26499 | 1145.368 | 10.26499 | 1145.366 | 10.26499 | 1145.366 | 10.26813 |
| 10.29662 | 1150.149 | 10.26613 | 1145.266 | 10.26613 | 1145.264 | 10.26613 | 1145.264 | 10.27    |
| 10.29977 | 1150.121 | 10.26813 | 1145.084 | 10.26813 | 1145.083 | 10.26813 | 1145.083 | 10.27148 |
| 10.3036  | 1150.087 | 10.27    | 1144.912 | 10.27    | 1144.911 | 10.27    | 1144.91  | 10.2728  |
| 10.30687 | 1150.059 | 10.27148 | 1144.773 | 10.27148 | 1144.772 | 10.27148 | 1144.772 | 10.27413 |
| 10.31    | 1150.031 | 10.2728  | 1144.647 | 10.2728  | 1144.645 | 10.2728  | 1144.645 | 10.27546 |
| 10.31374 | 1149.998 | 10.27413 | 1144.519 | 10.27413 | 1144.517 | 10.27413 | 1144.517 | 10.27778 |
| 10.31671 | 1149.972 | 10.27546 | 1144.389 | 10.27546 | 1144.387 | 10.27546 | 1144.387 | 10.28    |
| 10.31789 | 1149.962 | 10.27778 | 1144.159 | 10.27778 | 1144.157 | 10.27778 | 1144.157 | 10.28165 |
| 10.31964 | 1149.945 | 10.28    | 1143.935 | 10.28    | 1143.933 | 10.28    | 1143.933 | 10.28312 |
| 10.322   | 1149.921 | 10.28165 | 1143.765 | 10.28165 | 1143.763 | 10.28165 | 1143.763 | 10.28459 |
| 10.32375 | 1149.898 | 10.28312 | 1143.611 | 10.28312 | 1143.609 | 10.28312 | 1143.609 | 10.28606 |
| 10.32514 | 1149.877 | 10.28459 | 1143.455 | 10.28459 | 1143.453 | 10.28459 | 1143.453 | 10.28864 |
| 10.32653 | 1149.853 | 10.28606 | 1143.297 | 10.28606 | 1143.295 | 10.28606 | 1143.295 | 10.29    |
| 10.32792 | 1149.827 | 10.28864 | 1143.018 | 10.28864 | 1143.016 | 10.28864 | 1143.016 | 10.2918  |
| 10.33    | 1149.786 | 10.29    | 1142.868 | 10.29    | 1142.866 | 10.29    | 1142.866 | 10.29341 |
| 10.33159 | 1149.751 | 10.2918  | 1142.666 | 10.2918  | 1142.664 | 10.2918  | 1142.664 | 10.29485 |
| 10.33298 | 1149.719 | 10.2934  | 1142.484 | 10.2934  | 1142.482 | 10.2934  | 1142.482 | 10.29629 |
| 10.33405 | 1149.694 | 10.29484 | 1142.318 | 10.29485 | 1142.316 | 10.29485 | 1142.316 | 10.29773 |
| 10.33512 | 1149.668 | 10.29628 | 1142.151 | 10.29629 | 1142.149 | 10.29629 | 1142.148 | 10.3     |
| 10.33619 | 1149.642 | 10.29772 | 1141.981 | 10.29773 | 1141.979 | 10.29773 | 1141.979 | 10.30165 |
| 10.34    | 1149.541 | 10.3     | 1141.711 | 10.3     | 1141.709 | 10.3     | 1141.709 | 10.30298 |
| 10.341   | 1149.513 | 10.30165 | 1141.513 | 10.30165 | 1141.511 | 10.30165 | 1141.511 | 10.30432 |
| 10.34259 | 1149.465 | 10.30298 | 1141.35  | 10.30298 | 1141.348 | 10.30298 | 1141.348 | 10.30565 |
| 10.34479 | 1149.396 | 10.30432 | 1141.185 | 10.30432 | 1141.183 | 10.30432 | 1141.183 | 10.31    |
| 10.34723 | 1149.313 | 10.30565 | 1141.019 | 10.30565 | 1141.016 | 10.30565 | 1141.016 | 10.31153 |
| 10.34943 | 1149.234 | 10.31    | 1140.468 | 10.31    | 1140.466 | 10.31    | 1140.466 | 10.31295 |
| 10.35069 | 1149.186 | 10.31153 | 1140.271 | 10.31153 | 1140.269 | 10.31153 | 1140.269 | 10.31437 |
| 10.3525  | 1149.116 | 10.31295 | 1140.085 | 10.31295 | 1140.083 | 10.31295 | 1140.083 | 10.31578 |
| 10.35354 | 1149.074 | 10.31436 | 1139.898 | 10.31437 | 1139.895 | 10.31437 | 1139.895 | 10.32    |
| 10.35457 | 1149.032 | 10.31578 | 1139.708 | 10.31578 | 1139.706 | 10.31578 | 1139.706 | 10.32162 |
| 10.35561 | 1148.989 | 10.32    | 1139.136 | 10.32    | 1139.134 | 10.32    | 1139.134 | 10.32314 |
| 10.35743 | 1148.911 | 10.32162 | 1138.913 | 10.32162 | 1138.91  | 10.32162 | 1138.91  | 10.32465 |
| 10.35924 | 1148.832 | 10.32314 | 1138.701 | 10.32314 | 1138.698 | 10.32314 | 1138.698 | 10.32617 |

|          |          |          |          |          |          |          |          |          |
|----------|----------|----------|----------|----------|----------|----------|----------|----------|
| 10.36026 | 1148.786 | 10.32465 | 1138.486 | 10.32465 | 1138.484 | 10.32465 | 1138.484 | 10.33    |
| 10.36231 | 1148.689 | 10.32617 | 1138.27  | 10.32617 | 1138.268 | 10.32617 | 1138.267 | 10.33173 |
| 10.36426 | 1148.594 | 10.33    | 1137.716 | 10.33    | 1137.714 | 10.33    | 1137.714 | 10.33335 |
| 10.36694 | 1148.458 | 10.33173 | 1137.462 | 10.33173 | 1137.46  | 10.33173 | 1137.46  | 10.33497 |
| 10.36864 | 1148.368 | 10.33335 | 1137.222 | 10.33335 | 1137.219 | 10.33335 | 1137.219 | 10.33658 |
| 10.37    | 1148.295 | 10.33497 | 1136.978 | 10.33497 | 1136.976 | 10.33497 | 1136.976 | 10.34    |
| 10.37122 | 1148.229 | 10.33658 | 1136.733 | 10.33658 | 1136.73  | 10.33658 | 1136.73  | 10.34185 |
| 10.3723  | 1148.168 | 10.34    | 1136.208 | 10.34    | 1136.205 | 10.34    | 1136.205 | 10.34357 |
| 10.37338 | 1148.106 | 10.34185 | 1135.921 | 10.34185 | 1135.918 | 10.34185 | 1135.918 | 10.34529 |
| 10.37446 | 1148.044 | 10.34357 | 1135.65  | 10.34357 | 1135.647 | 10.34357 | 1135.646 | 10.347   |
| 10.37636 | 1147.932 | 10.34528 | 1135.375 | 10.34529 | 1135.373 | 10.34529 | 1135.372 | 10.35    |
| 10.37825 | 1147.818 | 10.347   | 1135.099 | 10.347   | 1135.096 | 10.347   | 1135.096 | 10.35196 |
| 10.38    | 1147.71  | 10.35    | 1134.612 | 10.35    | 1134.609 | 10.35    | 1134.609 | 10.35379 |
| 10.38131 | 1147.626 | 10.35196 | 1134.289 | 10.35196 | 1134.286 | 10.35196 | 1134.286 | 10.35561 |
| 10.38247 | 1147.551 | 10.35379 | 1133.985 | 10.35379 | 1133.982 | 10.35379 | 1133.982 | 10.35744 |
| 10.38352 | 1147.482 | 10.35561 | 1133.678 | 10.35561 | 1133.674 | 10.35561 | 1133.674 | 10.36    |
| 10.38456 | 1147.413 | 10.35744 | 1133.367 | 10.35744 | 1133.364 | 10.35744 | 1133.364 | 10.36208 |
| 10.38561 | 1147.342 | 10.36    | 1132.928 | 10.36    | 1132.925 | 10.36    | 1132.924 | 10.36402 |
| 10.38743 | 1147.217 | 10.36208 | 1132.567 | 10.36208 | 1132.564 | 10.36208 | 1132.563 | 10.36595 |
| 10.38926 | 1147.09  | 10.36401 | 1132.227 | 10.36401 | 1132.224 | 10.36401 | 1132.224 | 10.36788 |
| 10.39026 | 1147.019 | 10.36595 | 1131.885 | 10.36595 | 1131.881 | 10.36595 | 1131.881 | 10.37    |
| 10.39133 | 1146.941 | 10.36788 | 1131.539 | 10.36788 | 1131.535 | 10.36788 | 1131.535 | 10.37221 |
| 10.39253 | 1146.854 | 10.37    | 1131.155 | 10.37    | 1131.152 | 10.37    | 1131.152 | 10.37425 |
| 10.39372 | 1146.765 | 10.37221 | 1130.754 | 10.37221 | 1130.751 | 10.37221 | 1130.751 | 10.37629 |
| 10.39491 | 1146.675 | 10.37425 | 1130.377 | 10.37425 | 1130.374 | 10.37425 | 1130.374 | 10.37833 |
| 10.397   | 1146.516 | 10.37629 | 1129.997 | 10.37629 | 1129.993 | 10.37629 | 1129.993 | 10.38    |
| 10.39909 | 1146.353 | 10.37761 | 1129.748 | 10.37833 | 1129.609 | 10.37833 | 1129.609 | 10.38233 |
| 10.4003  | 1146.257 | 10.37898 | 1129.491 | 10.38    | 1129.292 | 10.38    | 1129.292 | 10.38448 |
| 10.40147 | 1146.162 | 10.38    | 1129.301 | 10.38233 | 1128.848 | 10.38233 | 1128.848 | 10.38663 |
| 10.40278 | 1146.054 | 10.38134 | 1129.051 | 10.38448 | 1128.431 | 10.38448 | 1128.431 | 10.38878 |
| 10.40396 | 1145.956 | 10.38284 | 1128.773 | 10.38663 | 1128.011 | 10.38663 | 1128.01  | 10.39    |
| 10.40514 | 1145.857 | 10.38434 | 1128.497 | 10.38878 | 1127.586 | 10.38878 | 1127.586 | 10.39246 |
| 10.40632 | 1145.757 | 10.38583 | 1128.222 | 10.39    | 1127.345 | 10.39    | 1127.344 | 10.39472 |
| 10.40838 | 1145.58  | 10.39    | 1127.459 | 10.39246 | 1126.855 | 10.39246 | 1126.854 | 10.39699 |
| 10.41    | 1145.438 | 10.39171 | 1127.148 | 10.39402 | 1126.539 | 10.39472 | 1126.396 | 10.39925 |
| 10.41152 | 1145.303 | 10.39321 | 1126.877 | 10.39517 | 1126.308 | 10.39699 | 1125.932 | 10.40032 |
| 10.41289 | 1145.179 | 10.39444 | 1126.654 | 10.3975  | 1125.841 | 10.39925 | 1125.465 | 10.40259 |
| 10.41426 | 1145.053 | 10.39567 | 1126.433 | 10.39959 | 1125.423 | 10.40032 | 1125.242 | 10.40497 |
| 10.41562 | 1144.926 | 10.39691 | 1126.211 | 10.4024  | 1124.865 | 10.40259 | 1124.771 | 10.40735 |
| 10.41801 | 1144.701 | 10.4     | 1125.659 | 10.40373 | 1124.601 | 10.40497 | 1124.268 | 10.40973 |
| 10.42    | 1144.511 | 10.40141 | 1125.409 | 10.40506 | 1124.338 | 10.40735 | 1123.759 | 10.41272 |
| 10.4217  | 1144.345 | 10.40264 | 1125.191 | 10.4064  | 1124.076 | 10.40973 | 1123.246 | 10.41522 |
| 10.42321 | 1144.195 | 10.40364 | 1125.014 | 10.41    | 1123.372 | 10.4111  | 1122.949 | 10.41772 |
| 10.42472 | 1144.043 | 10.40464 | 1124.839 | 10.41152 | 1123.076 | 10.41247 | 1122.652 | 10.42    |
| 10.42623 | 1143.89  | 10.40565 | 1124.663 | 10.41286 | 1122.817 | 10.41488 | 1122.134 | 10.42285 |
| 10.42887 | 1143.617 | 10.40963 | 1123.968 | 10.41395 | 1122.606 | 10.41705 | 1121.669 | 10.42547 |
| 10.43    | 1143.499 | 10.41101 | 1123.728 | 10.41505 | 1122.396 | 10.41922 | 1121.207 | 10.42809 |

|          |          |          |          |          |          |          |          |          |
|----------|----------|----------|----------|----------|----------|----------|----------|----------|
| 10.43185 | 1143.303 | 10.41257 | 1123.46  | 10.41614 | 1122.186 | 10.42031 | 1120.976 | 10.42965 |
| 10.43349 | 1143.126 | 10.41471 | 1123.092 | 10.41994 | 1121.459 | 10.42162 | 1120.698 | 10.43083 |
| 10.43496 | 1142.965 | 10.41608 | 1122.859 | 10.42099 | 1121.26  | 10.42307 | 1120.391 | 10.43231 |
| 10.43644 | 1142.802 | 10.41846 | 1122.453 | 10.42254 | 1120.966 | 10.42439 | 1120.114 | 10.43379 |
| 10.43791 | 1142.637 | 10.42    | 1122.192 | 10.42468 | 1120.562 | 10.4257  | 1119.839 | 10.43509 |
| 10.44    | 1142.402 | 10.42135 | 1121.965 | 10.42707 | 1120.115 | 10.42701 | 1119.564 | 10.43735 |
| 10.44169 | 1142.209 | 10.42246 | 1121.777 | 10.42921 | 1119.715 | 10.4293  | 1119.085 | 10.43897 |
| 10.44305 | 1142.051 | 10.42438 | 1121.456 | 10.43031 | 1119.511 | 10.43033 | 1118.871 | 10.44    |
| 10.44441 | 1141.891 | 10.42702 | 1121.017 | 10.43234 | 1119.135 | 10.43142 | 1118.644 | 10.44185 |
| 10.44578 | 1141.73  | 10.4287  | 1120.739 | 10.43424 | 1118.785 | 10.43264 | 1118.392 | 10.44347 |
| 10.45    | 1141.222 | 10.43    | 1120.525 | 10.43686 | 1118.306 | 10.43374 | 1118.165 | 10.44463 |
| 10.45156 | 1141.031 | 10.43113 | 1120.339 | 10.43852 | 1118.003 | 10.43484 | 1117.94  | 10.44579 |
| 10.45301 | 1140.851 | 10.43303 | 1120.029 | 10.44    | 1117.735 | 10.43593 | 1117.714 | 10.44695 |
| 10.45445 | 1140.67  | 10.43482 | 1119.738 | 10.44111 | 1117.534 | 10.43785 | 1117.321 | 10.45    |
| 10.4559  | 1140.486 | 10.43639 | 1119.483 | 10.44296 | 1117.201 | 10.43977 | 1116.929 | 10.45132 |
| 10.46    | 1139.958 | 10.43796 | 1119.23  | 10.44471 | 1116.887 | 10.44122 | 1116.636 | 10.45248 |
| 10.46165 | 1139.742 | 10.44    | 1118.903 | 10.44624 | 1116.614 | 10.44226 | 1116.424 | 10.45434 |
| 10.4632  | 1139.537 | 10.44112 | 1118.724 | 10.44777 | 1116.341 | 10.44415 | 1116.043 | 10.45896 |
| 10.46474 | 1139.33  | 10.44312 | 1118.407 | 10.4493  | 1116.07  | 10.44675 | 1115.522 | 10.46    |
| 10.46629 | 1139.12  | 10.44586 | 1117.974 | 10.45053 | 1115.853 | 10.4484  | 1115.192 | 10.46166 |
| 10.47    | 1138.611 | 10.44761 | 1117.7   | 10.45204 | 1115.588 | 10.45    | 1114.873 | 10.4631  |
| 10.47177 | 1138.365 | 10.44935 | 1117.427 | 10.45377 | 1115.285 | 10.4511  | 1114.655 | 10.46436 |
| 10.47341 | 1138.132 | 10.4506  | 1117.233 | 10.45614 | 1114.872 | 10.45292 | 1114.294 | 10.46562 |
| 10.47506 | 1137.897 | 10.45229 | 1116.972 | 10.45765 | 1114.61  | 10.45465 | 1113.954 | 10.46782 |
| 10.47671 | 1137.659 | 10.45422 | 1116.675 | 10.46    | 1114.205 | 10.45616 | 1113.658 | 10.47    |
| 10.48    | 1137.179 | 10.45688 | 1116.268 | 10.4611  | 1114.016 | 10.45767 | 1113.362 | 10.47124 |
| 10.48188 | 1136.901 | 10.45857 | 1116.011 | 10.46307 | 1113.679 | 10.45918 | 1113.068 | 10.47228 |
| 10.48363 | 1136.639 | 10.46    | 1115.795 | 10.46578 | 1113.218 | 10.46022 | 1112.867 | 10.47406 |
| 10.48539 | 1136.373 | 10.46124 | 1115.608 | 10.46751 | 1112.927 | 10.46198 | 1112.525 | 10.4765  |
| 10.48714 | 1136.106 | 10.46235 | 1115.442 | 10.46923 | 1112.637 | 10.46366 | 1112.203 | 10.47806 |
| 10.49    | 1135.664 | 10.46346 | 1115.276 | 10.47025 | 1112.468 | 10.46596 | 1111.762 | 10.47962 |
| 10.492   | 1135.352 | 10.46457 | 1115.11  | 10.47229 | 1112.127 | 10.46742 | 1111.482 | 10.48106 |
| 10.49386 | 1135.057 | 10.46651 | 1114.822 | 10.47423 | 1111.806 | 10.46999 | 1110.995 | 10.48282 |
| 10.49572 | 1134.759 | 10.46845 | 1114.536 | 10.47689 | 1111.368 | 10.47139 | 1110.729 | 10.48449 |
| 10.49758 | 1134.459 | 10.47    | 1114.309 | 10.47859 | 1111.09  | 10.47319 | 1110.391 | 10.48595 |
| 10.5     | 1134.065 | 10.47137 | 1114.108 | 10.48    | 1110.86  | 10.4751  | 1110.033 | 10.48742 |
| 10.50213 | 1133.716 | 10.4726  | 1113.931 | 10.48125 | 1110.657 | 10.47774 | 1109.542 | 10.48997 |
| 10.50409 | 1133.387 | 10.47382 | 1113.754 | 10.48237 | 1110.476 | 10.47941 | 1109.231 | 10.49139 |
| 10.50606 | 1133.055 | 10.47504 | 1113.578 | 10.4835  | 1110.295 | 10.48057 | 1109.017 | 10.49318 |
| 10.50803 | 1132.72  | 10.47718 | 1113.271 | 10.48462 | 1110.115 | 10.48219 | 1108.721 | 10.49508 |
| 10.51    | 1132.383 | 10.47931 | 1112.966 | 10.48658 | 1109.801 | 10.48403 | 1108.383 | 10.4977  |
| 10.51225 | 1131.994 | 10.48074 | 1112.764 | 10.48855 | 1109.488 | 10.48657 | 1107.922 | 10.49937 |
| 10.51433 | 1131.629 | 10.48282 | 1112.471 | 10.49    | 1109.258 | 10.48818 | 1107.629 | 10.50057 |
| 10.51642 | 1131.26  | 10.48401 | 1112.304 | 10.4914  | 1109.039 | 10.49    | 1107.302 | 10.50218 |
| 10.5185  | 1130.887 | 10.48521 | 1112.138 | 10.49264 | 1108.844 | 10.49118 | 1107.089 | 10.50402 |
| 10.52    | 1130.617 | 10.4864  | 1111.972 | 10.49388 | 1108.65  | 10.49224 | 1106.9   | 10.50656 |
| 10.52238 | 1130.186 | 10.48849 | 1111.684 | 10.49512 | 1108.457 | 10.4933  | 1106.711 | 10.50817 |

|          |          |          |          |          |          |          |          |          |
|----------|----------|----------|----------|----------|----------|----------|----------|----------|
| 10.52458 | 1129.782 | 10.49    | 1111.476 | 10.49729 | 1108.121 | 10.49436 | 1106.522 | 10.51    |
| 10.52678 | 1129.374 | 10.49154 | 1111.266 | 10.49946 | 1107.786 | 10.49622 | 1106.193 | 10.51119 |
| 10.52897 | 1128.961 | 10.49292 | 1111.078 | 10.50075 | 1107.589 | 10.49807 | 1105.866 | 10.51225 |
| 10.53    | 1128.768 | 10.49429 | 1110.892 | 10.50287 | 1107.266 | 10.49993 | 1105.54  | 10.51331 |
| 10.53251 | 1128.293 | 10.49567 | 1110.706 | 10.50409 | 1107.083 | 10.50131 | 1105.298 | 10.51438 |
| 10.53483 | 1127.847 | 10.49809 | 1110.383 | 10.5053  | 1106.899 | 10.50248 | 1105.095 | 10.51624 |
| 10.53715 | 1127.397 | 10.5     | 1110.129 | 10.50652 | 1106.717 | 10.50365 | 1104.892 | 10.5181  |
| 10.53946 | 1126.943 | 10.50171 | 1109.903 | 10.50865 | 1106.399 | 10.50482 | 1104.691 | 10.51996 |
| 10.54265 | 1126.314 | 10.50323 | 1109.704 | 10.51    | 1106.198 | 10.50687 | 1104.338 | 10.52132 |
| 10.54508 | 1125.824 | 10.50475 | 1109.506 | 10.51157 | 1105.966 | 10.50891 | 1103.988 | 10.5225  |
| 10.54752 | 1125.33  | 10.50627 | 1109.309 | 10.51297 | 1105.759 | 10.51    | 1103.803 | 10.52368 |
| 10.54996 | 1124.83  | 10.50893 | 1108.966 | 10.51438 | 1105.553 | 10.51143 | 1103.559 | 10.52485 |
| 10.55279 | 1124.249 | 10.51    | 1108.829 | 10.51579 | 1105.348 | 10.51271 | 1103.344 | 10.52691 |
| 10.55535 | 1123.713 | 10.51186 | 1108.593 | 10.51825 | 1104.991 | 10.51385 | 1103.152 | 10.52897 |
| 10.55791 | 1123.171 | 10.5135  | 1108.385 | 10.52    | 1104.739 | 10.515   | 1102.96  | 10.53    |
| 10.56    | 1122.726 | 10.51498 | 1108.2   | 10.52175 | 1104.49  | 10.51614 | 1102.768 | 10.53145 |
| 10.56293 | 1122.099 | 10.51646 | 1108.015 | 10.5233  | 1104.269 | 10.51815 | 1102.434 | 10.53273 |
| 10.56561 | 1121.514 | 10.51794 | 1107.831 | 10.52485 | 1104.05  | 10.52    | 1102.127 | 10.53389 |
| 10.5683  | 1120.923 | 10.52    | 1107.577 | 10.5264  | 1103.832 | 10.52148 | 1101.883 | 10.53504 |
| 10.57    | 1120.547 | 10.52111 | 1107.44  | 10.52912 | 1103.452 | 10.52281 | 1101.665 | 10.5362  |
| 10.57307 | 1119.864 | 10.52227 | 1107.299 | 10.53019 | 1103.303 | 10.52414 | 1101.448 | 10.53822 |
| 10.57589 | 1119.227 | 10.52343 | 1107.159 | 10.53137 | 1103.14  | 10.52546 | 1101.232 | 10.54    |
| 10.57871 | 1118.584 | 10.52444 | 1107.036 | 10.53255 | 1102.978 | 10.52779 | 1100.856 | 10.54149 |
| 10.58    | 1118.287 | 10.52621 | 1106.824 | 10.53372 | 1102.817 | 10.53    | 1100.5   | 10.54284 |
| 10.58322 | 1117.544 | 10.52749 | 1106.67  | 10.53648 | 1102.441 | 10.53165 | 1100.236 | 10.54418 |
| 10.58617 | 1116.853 | 10.52878 | 1106.518 | 10.53925 | 1102.068 | 10.53312 | 1100.003 | 10.54552 |
| 10.58912 | 1116.154 | 10.52993 | 1106.381 | 10.54039 | 1101.914 | 10.53459 | 1099.771 | 10.54787 |
| 10.59042 | 1115.844 | 10.53132 | 1106.217 | 10.54143 | 1101.776 | 10.53605 | 1099.539 | 10.54963 |
| 10.59337 | 1115.139 | 10.53247 | 1106.082 | 10.54324 | 1101.536 | 10.53862 | 1099.137 | 10.55068 |
| 10.59646 | 1114.39  | 10.53422 | 1105.878 | 10.54505 | 1101.298 | 10.53965 | 1098.977 | 10.55187 |
| 10.59954 | 1113.633 | 10.53792 | 1105.452 | 10.54755 | 1100.972 | 10.54137 | 1098.711 | 10.55306 |
| 10.60353 | 1112.649 | 10.54    | 1105.214 | 10.54913 | 1100.766 | 10.54255 | 1098.529 | 10.55424 |
| 10.60675 | 1111.839 | 10.54131 | 1105.066 | 10.55023 | 1100.625 | 10.54372 | 1098.348 | 10.55704 |
| 10.60997 | 1111.02  | 10.54247 | 1104.936 | 10.55181 | 1100.422 | 10.5465  | 1097.924 | 10.55983 |
| 10.61368 | 1110.073 | 10.54348 | 1104.823 | 10.55331 | 1100.23  | 10.54928 | 1097.503 | 10.56144 |
| 10.61705 | 1109.199 | 10.54525 | 1104.626 | 10.55538 | 1099.968 | 10.5504  | 1097.334 | 10.56325 |
| 10.62    | 1108.426 | 10.54684 | 1104.449 | 10.55669 | 1099.803 | 10.55143 | 1097.18  | 10.56506 |
| 10.62166 | 1107.991 | 10.54963 | 1104.144 | 10.55801 | 1099.638 | 10.55323 | 1096.911 | 10.56755 |
| 10.62303 | 1107.63  | 10.55071 | 1104.027 | 10.56    | 1099.39  | 10.55503 | 1096.644 | 10.56914 |
| 10.6263  | 1106.775 | 10.55181 | 1103.909 | 10.5616  | 1099.193 | 10.55751 | 1096.28  | 10.57023 |
| 10.62893 | 1106.088 | 10.55331 | 1103.747 | 10.56294 | 1099.029 | 10.55908 | 1096.049 | 10.57182 |
| 10.63    | 1105.811 | 10.55595 | 1103.467 | 10.56478 | 1098.804 | 10.56023 | 1095.883 | 10.57333 |
| 10.63301 | 1105.029 | 10.55762 | 1103.29  | 10.56595 | 1098.662 | 10.56181 | 1095.654 | 10.5754  |
| 10.63449 | 1104.647 | 10.56    | 1103.043 | 10.56712 | 1098.521 | 10.56331 | 1095.438 | 10.57673 |
| 10.63597 | 1104.265 | 10.56178 | 1102.859 | 10.56917 | 1098.276 | 10.56537 | 1095.143 | 10.57805 |
| 10.63745 | 1103.885 | 10.56319 | 1102.715 | 10.57029 | 1098.141 | 10.56668 | 1094.957 | 10.58    |
| 10.64    | 1103.23  | 10.56513 | 1102.517 | 10.57157 | 1097.99  | 10.56799 | 1094.771 | 10.58161 |

|          |          |          |          |          |          |          |          |          |
|----------|----------|----------|----------|----------|----------|----------|----------|----------|
| 10.64169 | 1102.798 | 10.56637 | 1102.393 | 10.57316 | 1097.803 | 10.57    | 1094.488 | 10.58296 |
| 10.64317 | 1102.421 | 10.56761 | 1102.269 | 10.57459 | 1097.637 | 10.5716  | 1094.264 | 10.58481 |
| 10.64446 | 1102.091 | 10.56977 | 1102.054 | 10.57583 | 1097.492 | 10.57294 | 1094.078 | 10.58599 |
| 10.64576 | 1101.763 | 10.57114 | 1101.919 | 10.57708 | 1097.348 | 10.57478 | 1093.823 | 10.58717 |
| 10.64706 | 1101.434 | 10.57259 | 1101.777 | 10.57833 | 1097.204 | 10.57596 | 1093.662 | 10.58923 |
| 10.65    | 1100.69  | 10.57411 | 1101.631 | 10.58    | 1097.013 | 10.57713 | 1093.501 | 10.59029 |
| 10.65148 | 1100.317 | 10.57619 | 1101.43  | 10.58163 | 1096.828 | 10.57918 | 1093.222 | 10.59159 |
| 10.65278 | 1099.992 | 10.57752 | 1101.304 | 10.58302 | 1096.673 | 10.58029 | 1093.072 | 10.59318 |
| 10.65388 | 1099.714 | 10.57884 | 1101.179 | 10.58492 | 1096.461 | 10.58158 | 1092.899 | 10.59462 |
| 10.65499 | 1099.437 | 10.58    | 1101.07  | 10.58612 | 1096.327 | 10.58317 | 1092.686 | 10.59588 |
| 10.6561  | 1099.161 | 10.58176 | 1100.906 | 10.58824 | 1096.094 | 10.58461 | 1092.495 | 10.59714 |
| 10.66    | 1098.19  | 10.58325 | 1100.769 | 10.59    | 1095.902 | 10.58586 | 1092.329 | 10.59839 |
| 10.66127 | 1097.876 | 10.58529 | 1100.582 | 10.59118 | 1095.774 | 10.58711 | 1092.164 | 10.6     |
| 10.66237 | 1097.602 | 10.5866  | 1100.464 | 10.59272 | 1095.609 | 10.58837 | 1092     | 10.60165 |
| 10.66437 | 1097.11  | 10.58888 | 1100.26  | 10.5944  | 1095.43  | 10.59    | 1091.787 | 10.60304 |
| 10.67    | 1095.729 | 10.59    | 1100.16  | 10.59671 | 1095.186 | 10.59164 | 1091.574 | 10.60495 |
| 10.67114 | 1095.451 | 10.59128 | 1100.047 | 10.59817 | 1095.033 | 10.59303 | 1091.396 | 10.60617 |
| 10.67287 | 1095.031 | 10.59296 | 1099.9   | 10.59964 | 1094.88  | 10.59494 | 1091.152 | 10.6083  |
| 10.67675 | 1094.09  | 10.5948  | 1099.742 | 10.60104 | 1094.736 | 10.59615 | 1090.998 | 10.61    |
| 10.67977 | 1093.362 | 10.59734 | 1099.526 | 10.60279 | 1094.558 | 10.59828 | 1090.73  | 10.61119 |
| 10.68087 | 1093.099 | 10.59895 | 1099.39  | 10.60444 | 1094.39  | 10.6     | 1090.515 | 10.61274 |
| 10.68239 | 1092.734 | 10.6     | 1099.302 | 10.60589 | 1094.244 | 10.60119 | 1090.368 | 10.61442 |
| 10.68373 | 1092.416 | 10.60114 | 1099.208 | 10.60734 | 1094.099 | 10.60273 | 1090.177 | 10.61674 |
| 10.68484 | 1092.151 | 10.60215 | 1099.125 | 10.60988 | 1093.849 | 10.60442 | 1089.97  | 10.61821 |
| 10.68595 | 1091.887 | 10.60397 | 1098.976 | 10.61143 | 1093.697 | 10.60674 | 1089.689 | 10.61969 |
| 10.68706 | 1091.624 | 10.60647 | 1098.775 | 10.61331 | 1093.516 | 10.60821 | 1089.511 | 10.62104 |
| 10.689   | 1091.163 | 10.60806 | 1098.649 | 10.61434 | 1093.418 | 10.60969 | 1089.334 | 10.62279 |
| 10.69    | 1090.927 | 10.61    | 1098.496 | 10.61537 | 1093.32  | 10.61104 | 1089.173 | 10.62446 |
| 10.69133 | 1090.614 | 10.61119 | 1098.404 | 10.6164  | 1093.222 | 10.6128  | 1088.966 | 10.62591 |
| 10.6925  | 1090.339 | 10.61226 | 1098.321 | 10.6182  | 1093.053 | 10.61446 | 1088.772 | 10.62737 |
| 10.69355 | 1090.092 | 10.61334 | 1098.239 | 10.62    | 1092.885 | 10.61592 | 1088.602 | 10.62991 |
| 10.6946  | 1089.845 | 10.61441 | 1098.158 | 10.62127 | 1092.768 | 10.61737 | 1088.434 | 10.63144 |
| 10.69565 | 1089.599 | 10.61629 | 1098.017 | 10.6224  | 1092.665 | 10.61992 | 1088.142 | 10.63331 |
| 10.6975  | 1089.169 | 10.61817 | 1097.878 | 10.62341 | 1092.573 | 10.62144 | 1087.97  | 10.63435 |
| 10.69934 | 1088.741 | 10.62    | 1097.743 | 10.62442 | 1092.482 | 10.62332 | 1087.759 | 10.63538 |
| 10.70065 | 1088.436 | 10.62135 | 1097.646 | 10.62544 | 1092.391 | 10.62435 | 1087.644 | 10.63641 |
| 10.70251 | 1088.006 | 10.62256 | 1097.559 | 10.62721 | 1092.233 | 10.62539 | 1087.53  | 10.63821 |
| 10.70369 | 1087.733 | 10.62377 | 1097.474 | 10.62899 | 1092.076 | 10.62642 | 1087.416 | 10.64    |
| 10.70488 | 1087.46  | 10.62498 | 1097.389 | 10.63    | 1091.988 | 10.62823 | 1087.218 | 10.64127 |
| 10.70695 | 1086.984 | 10.6271  | 1097.243 | 10.63132 | 1091.873 | 10.63    | 1087.025 | 10.6424  |
| 10.70902 | 1086.51  | 10.62921 | 1097.098 | 10.63251 | 1091.771 | 10.63127 | 1086.888 | 10.64341 |
| 10.7103  | 1086.219 | 10.6303  | 1097.025 | 10.6337  | 1091.67  | 10.6324  | 1086.767 | 10.64443 |
| 10.71145 | 1085.958 | 10.6315  | 1096.945 | 10.6349  | 1091.569 | 10.63342 | 1086.659 | 10.64544 |
| 10.71273 | 1085.667 | 10.63284 | 1096.857 | 10.63698 | 1091.395 | 10.63444 | 1086.551 | 10.64722 |
| 10.71388 | 1085.406 | 10.63417 | 1096.77  | 10.63906 | 1091.222 | 10.63545 | 1086.444 | 10.64899 |
| 10.71503 | 1085.146 | 10.63551 | 1096.685 | 10.6403  | 1091.122 | 10.63723 | 1086.258 | 10.65    |
| 10.71618 | 1084.886 | 10.63785 | 1096.536 | 10.6415  | 1091.025 | 10.63901 | 1086.074 | 10.65132 |



|          |          |          |          |          |          |          |          |          |
|----------|----------|----------|----------|----------|----------|----------|----------|----------|
| 10.7182  | 1084.432 | 10.64    | 1096.402 | 10.64283 | 1090.918 | 10.64025 | 1085.946 | 10.65251 |
| 10.72    | 1084.028 | 10.64165 | 1096.302 | 10.64416 | 1090.812 | 10.64133 | 1085.837 | 10.6537  |
| 10.72148 | 1083.698 | 10.64311 | 1096.214 | 10.6455  | 1090.708 | 10.64252 | 1085.716 | 10.6549  |
| 10.7228  | 1083.403 | 10.64442 | 1096.136 | 10.64783 | 1090.526 | 10.64371 | 1085.596 | 10.65698 |
| 10.72412 | 1083.109 | 10.64574 | 1096.059 | 10.65    | 1090.36  | 10.64491 | 1085.477 | 10.65906 |
| 10.72544 | 1082.816 | 10.64705 | 1095.983 | 10.65165 | 1090.236 | 10.647   | 1085.27  | 10.6603  |
| 10.72775 | 1082.304 | 10.64935 | 1095.852 | 10.65312 | 1090.128 | 10.64909 | 1085.065 | 10.66149 |
| 10.73    | 1081.809 | 10.65083 | 1095.769 | 10.65458 | 1090.02  | 10.6503  | 1084.948 | 10.66283 |
| 10.73163 | 1081.452 | 10.65323 | 1095.638 | 10.65605 | 1089.914 | 10.6515  | 1084.832 | 10.66416 |
| 10.73308 | 1081.135 | 10.65476 | 1095.557 | 10.65861 | 1089.731 | 10.65284 | 1084.705 | 10.66549 |
| 10.73438 | 1080.851 | 10.65629 | 1095.476 | 10.66    | 1089.633 | 10.65417 | 1084.578 | 10.66783 |
| 10.73568 | 1080.567 | 10.65897 | 1095.338 | 10.6618  | 1089.508 | 10.65551 | 1084.453 | 10.67    |
| 10.73674 | 1080.338 | 10.66    | 1095.286 | 10.66339 | 1089.399 | 10.65785 | 1084.236 | 10.67165 |
| 10.73783 | 1080.101 | 10.6619  | 1095.192 | 10.66483 | 1089.303 | 10.66    | 1084.039 | 10.67311 |
| 10.73893 | 1079.864 | 10.6636  | 1095.11  | 10.66626 | 1089.207 | 10.66165 | 1083.889 | 10.67443 |
| 10.74    | 1079.632 | 10.66529 | 1095.03  | 10.6677  | 1089.113 | 10.66312 | 1083.758 | 10.67574 |
| 10.74125 | 1079.362 | 10.66698 | 1094.951 | 10.67    | 1088.964 | 10.66459 | 1083.628 | 10.67706 |
| 10.7423  | 1079.137 | 10.66995 | 1094.817 | 10.67164 | 1088.859 | 10.66606 | 1083.5   | 10.67937 |
| 10.74335 | 1078.911 | 10.67102 | 1094.77  | 10.67297 | 1088.776 | 10.66862 | 1083.277 | 10.68083 |
| 10.74441 | 1078.686 | 10.67207 | 1094.724 | 10.6743  | 1088.694 | 10.67    | 1083.16  | 10.68324 |
| 10.74808 | 1077.902 | 10.67391 | 1094.647 | 10.67563 | 1088.613 | 10.6718  | 1083.008 | 10.68477 |
| 10.75    | 1077.495 | 10.67556 | 1094.579 | 10.68    | 1088.353 | 10.6734  | 1082.875 | 10.6863  |
| 10.75175 | 1077.126 | 10.67722 | 1094.512 | 10.68152 | 1088.265 | 10.67483 | 1082.757 | 10.68899 |
| 10.75389 | 1076.675 | 10.67887 | 1094.447 | 10.68294 | 1088.185 | 10.67627 | 1082.64  | 10.69    |
| 10.75491 | 1076.461 | 10.68    | 1094.404 | 10.68435 | 1088.107 | 10.6777  | 1082.524 | 10.69191 |
| 10.75594 | 1076.247 | 10.68189 | 1094.332 | 10.68577 | 1088.029 | 10.68    | 1082.341 | 10.6936  |
| 10.75696 | 1076.033 | 10.68341 | 1094.276 | 10.69    | 1087.804 | 10.68164 | 1082.212 | 10.6953  |
| 10.75875 | 1075.661 | 10.68493 | 1094.222 | 10.69162 | 1087.72  | 10.68297 | 1082.109 | 10.69699 |
| 10.76    | 1075.4   | 10.68646 | 1094.169 | 10.69313 | 1087.644 | 10.6843  | 1082.007 | 10.69996 |
| 10.76114 | 1075.165 | 10.69    | 1094.051 | 10.69464 | 1087.57  | 10.68564 | 1081.906 | 10.70102 |
| 10.763   | 1074.78  | 10.69174 | 1093.995 | 10.69615 | 1087.497 | 10.69    | 1081.582 | 10.70207 |
| 10.76476 | 1074.417 | 10.69335 | 1093.947 | 10.7     | 1087.316 | 10.69152 | 1081.472 | 10.70391 |
| 10.76631 | 1074.101 | 10.69495 | 1093.899 | 10.70173 | 1087.238 | 10.69294 | 1081.371 | 10.70556 |
| 10.76785 | 1073.785 | 10.69656 | 1093.854 | 10.70334 | 1087.167 | 10.69435 | 1081.272 | 10.70722 |
| 10.76939 | 1073.47  | 10.7     | 1093.76  | 10.70495 | 1087.098 | 10.69577 | 1081.173 | 10.70887 |
| 10.77051 | 1073.242 | 10.70184 | 1093.713 | 10.70655 | 1087.031 | 10.7     | 1080.886 | 10.71    |
| 10.77191 | 1072.958 | 10.70354 | 1093.672 | 10.71    | 1086.892 | 10.70162 | 1080.778 | 10.71189 |
| 10.77352 | 1072.634 | 10.70525 | 1093.633 | 10.71184 | 1086.82  | 10.70313 | 1080.68  | 10.71399 |
| 10.77572 | 1072.19  | 10.70695 | 1093.596 | 10.714   | 1086.74  | 10.70464 | 1080.584 | 10.71516 |
| 10.77712 | 1071.908 | 10.71    | 1093.533 | 10.71517 | 1086.698 | 10.70615 | 1080.489 | 10.71662 |
| 10.77853 | 1071.628 | 10.71195 | 1093.496 | 10.71664 | 1086.646 | 10.71    | 1080.252 | 10.71801 |
| 10.78    | 1071.334 | 10.71411 | 1093.459 | 10.71803 | 1086.597 | 10.71173 | 1080.149 | 10.72    |
| 10.78183 | 1070.969 | 10.71528 | 1093.439 | 10.72    | 1086.532 | 10.71399 | 1080.018 | 10.7211  |
| 10.78338 | 1070.663 | 10.71674 | 1093.416 | 10.72111 | 1086.496 | 10.71506 | 1079.956 | 10.72267 |
| 10.78551 | 1070.243 | 10.71814 | 1093.395 | 10.72286 | 1086.441 | 10.71625 | 1079.889 | 10.72423 |
| 10.78687 | 1069.976 | 10.72    | 1093.37  | 10.72462 | 1086.388 | 10.71738 | 1079.826 | 10.72579 |
| 10.78924 | 1069.512 | 10.72111 | 1093.356 | 10.7266  | 1086.332 | 10.71915 | 1079.73  | 10.73    |

|          |          |          |          |          |          |          |          |          |
|----------|----------|----------|----------|----------|----------|----------|----------|----------|
| 10.79034 | 1069.298 | 10.72296 | 1093.335 | 10.72858 | 1086.277 | 10.72112 | 1079.624 | 10.73179 |
| 10.7919  | 1068.995 | 10.7248  | 1093.316 | 10.73    | 1086.24  | 10.72278 | 1079.537 | 10.73348 |
| 10.79296 | 1068.789 | 10.72692 | 1093.298 | 10.73227 | 1086.182 | 10.72444 | 1079.452 | 10.73518 |
| 10.79473 | 1068.446 | 10.72903 | 1093.282 | 10.73419 | 1086.137 | 10.72611 | 1079.37  | 10.73688 |
| 10.79718 | 1067.976 | 10.7303  | 1093.274 | 10.73611 | 1086.094 | 10.73    | 1079.181 | 10.74    |
| 10.79874 | 1067.677 | 10.73241 | 1093.261 | 10.73804 | 1086.054 | 10.7319  | 1079.093 | 10.74194 |
| 10.8     | 1067.436 | 10.73444 | 1093.254 | 10.74    | 1086.015 | 10.7337  | 1079.012 | 10.74374 |
| 10.80108 | 1067.23  | 10.73647 | 1093.249 | 10.7422  | 1085.973 | 10.73551 | 1078.933 | 10.74554 |
| 10.8029  | 1066.885 | 10.7385  | 1093.248 | 10.74422 | 1085.94  | 10.73731 | 1078.857 | 10.74734 |
| 10.80462 | 1066.56  | 10.74    | 1093.248 | 10.74623 | 1085.909 | 10.74    | 1078.747 | 10.75    |
| 10.80613 | 1066.276 | 10.74232 | 1093.25  | 10.74825 | 1085.882 | 10.74206 | 1078.665 | 10.75206 |
| 10.80764 | 1065.992 | 10.74444 | 1093.257 | 10.75    | 1085.859 | 10.74397 | 1078.593 | 10.75396 |
| 10.81    | 1065.551 | 10.74656 | 1093.267 | 10.75231 | 1085.832 | 10.74588 | 1078.523 | 10.75586 |
| 10.81111 | 1065.344 | 10.74868 | 1093.28  | 10.75443 | 1085.812 | 10.74779 | 1078.456 | 10.75776 |
| 10.81311 | 1064.974 | 10.75    | 1093.29  | 10.75655 | 1085.795 | 10.75    | 1078.381 | 10.76    |
| 10.81585 | 1064.468 | 10.75242 | 1093.309 | 10.75867 | 1085.782 | 10.75218 | 1078.31  | 10.76217 |
| 10.8176  | 1064.148 | 10.75465 | 1093.333 | 10.76    | 1085.775 | 10.75419 | 1078.248 | 10.76417 |
| 10.82    | 1063.71  | 10.75688 | 1093.36  | 10.76242 | 1085.764 | 10.75621 | 1078.19  | 10.76618 |
| 10.82125 | 1063.483 | 10.75911 | 1093.391 | 10.76465 | 1085.76  | 10.75822 | 1078.135 | 10.76818 |
| 10.82236 | 1063.282 | 10.76032 | 1093.408 | 10.76688 | 1085.759 | 10.76    | 1078.087 | 10.77    |
| 10.82347 | 1063.081 | 10.76255 | 1093.443 | 10.76911 | 1085.762 | 10.7623  | 1078.028 | 10.77229 |
| 10.82458 | 1062.881 | 10.76488 | 1093.485 | 10.77032 | 1085.765 | 10.76442 | 1077.979 | 10.77439 |
| 10.82653 | 1062.532 | 10.76722 | 1093.532 | 10.77255 | 1085.772 | 10.76653 | 1077.934 | 10.7765  |
| 10.82847 | 1062.184 | 10.76955 | 1093.582 | 10.77488 | 1085.785 | 10.76865 | 1077.892 | 10.7786  |
| 10.83    | 1061.912 | 10.77267 | 1093.653 | 10.77722 | 1085.803 | 10.77    | 1077.866 | 10.78    |
| 10.83137 | 1061.668 | 10.77512 | 1093.716 | 10.77955 | 1085.825 | 10.77242 | 1077.822 | 10.78241 |
| 10.83259 | 1061.453 | 10.77756 | 1093.785 | 10.78267 | 1085.858 | 10.77464 | 1077.788 | 10.78462 |
| 10.83381 | 1061.238 | 10.78    | 1093.857 | 10.78511 | 1085.892 | 10.77686 | 1077.757 | 10.78683 |
| 10.83503 | 1061.024 | 10.78279 | 1093.943 | 10.78756 | 1085.93  | 10.77908 | 1077.731 | 10.78904 |
| 10.83717 | 1060.65  | 10.78535 | 1094.03  | 10.79    | 1085.974 | 10.78032 | 1077.717 | 10.79032 |
| 10.83931 | 1060.279 | 10.78791 | 1094.122 | 10.79279 | 1086.026 | 10.78254 | 1077.694 | 10.79253 |
| 10.84074 | 1060.03  | 10.79    | 1094.201 | 10.79535 | 1086.082 | 10.78487 | 1077.676 | 10.79484 |
| 10.84283 | 1059.669 | 10.79292 | 1094.314 | 10.7979  | 1086.144 | 10.7872  | 1077.663 | 10.79716 |
| 10.84403 | 1059.464 | 10.79559 | 1094.426 | 10.8     | 1086.198 | 10.78953 | 1077.654 | 10.79947 |
| 10.84523 | 1059.259 | 10.79825 | 1094.545 | 10.80292 | 1086.276 | 10.79266 | 1077.645 | 10.80265 |
| 10.84643 | 1059.054 | 10.8     | 1094.625 | 10.80558 | 1086.357 | 10.7951  | 1077.646 | 10.80507 |
| 10.84853 | 1058.698 | 10.80305 | 1094.769 | 10.80824 | 1086.445 | 10.79753 | 1077.653 | 10.80749 |
| 10.85    | 1058.449 | 10.80582 | 1094.91  | 10.81    | 1086.505 | 10.79997 | 1077.664 | 10.80991 |
| 10.85155 | 1058.188 | 10.8086  | 1095.058 | 10.81304 | 1086.613 | 10.80278 | 1077.679 | 10.81277 |
| 10.85295 | 1057.954 | 10.81    | 1095.134 | 10.81582 | 1086.722 | 10.80533 | 1077.702 | 10.8153  |
| 10.85435 | 1057.721 | 10.81317 | 1095.311 | 10.81859 | 1086.838 | 10.80787 | 1077.73  | 10.81783 |
| 10.85575 | 1057.488 | 10.81606 | 1095.484 | 10.82    | 1086.898 | 10.81    | 1077.758 | 10.82    |
| 10.85819 | 1057.083 | 10.81895 | 1095.664 | 10.82317 | 1087.038 | 10.81291 | 1077.798 | 10.82289 |
| 10.86    | 1056.785 | 10.82    | 1095.731 | 10.82605 | 1087.178 | 10.81556 | 1077.845 | 10.82553 |
| 10.86174 | 1056.5   | 10.8233  | 1095.944 | 10.82893 | 1087.325 | 10.81821 | 1077.898 | 10.82816 |
| 10.86329 | 1056.248 | 10.8263  | 1096.151 | 10.83    | 1087.381 | 10.82    | 1077.936 | 10.83    |
| 10.86484 | 1055.996 | 10.82929 | 1096.367 | 10.83329 | 1087.557 | 10.82303 | 1078.005 | 10.83301 |

|          |          |          |          |          |          |          |          |          |
|----------|----------|----------|----------|----------|----------|----------|----------|----------|
| 10.86639 | 1055.746 | 10.83043 | 1096.45  | 10.83629 | 1087.73  | 10.82579 | 1078.078 | 10.83576 |
| 10.86911 | 1055.31  | 10.83342 | 1096.672 | 10.83928 | 1087.912 | 10.82856 | 1078.158 | 10.8385  |
| 10.87039 | 1055.105 | 10.83653 | 1096.916 | 10.84043 | 1087.983 | 10.83    | 1078.202 | 10.84    |
| 10.8719  | 1054.864 | 10.83963 | 1097.17  | 10.84342 | 1088.171 | 10.83316 | 1078.302 | 10.84314 |
| 10.87359 | 1054.597 | 10.84355 | 1097.497 | 10.84651 | 1088.381 | 10.83603 | 1078.405 | 10.84599 |
| 10.87511 | 1054.358 | 10.84675 | 1097.782 | 10.84961 | 1088.6   | 10.8389  | 1078.516 | 10.84884 |
| 10.87663 | 1054.12  | 10.84996 | 1098.077 | 10.85354 | 1088.885 | 10.84    | 1078.56  | 10.85    |
| 10.87815 | 1053.883 | 10.85367 | 1098.424 | 10.85674 | 1089.135 | 10.84328 | 1078.694 | 10.85326 |
| 10.88    | 1053.595 | 10.85697 | 1098.752 | 10.85994 | 1089.395 | 10.84626 | 1078.83  | 10.85622 |
| 10.88174 | 1053.326 | 10.86    | 1099.063 | 10.86366 | 1089.703 | 10.84924 | 1078.974 | 10.85918 |
| 10.88314 | 1053.11  | 10.86378 | 1099.456 | 10.86696 | 1089.996 | 10.85043 | 1079.033 | 10.86042 |
| 10.88455 | 1052.895 | 10.86718 | 1099.83  | 10.87    | 1090.276 | 10.8534  | 1079.184 | 10.86338 |
| 10.88596 | 1052.68  | 10.87    | 1100.15  | 10.87377 | 1090.629 | 10.85649 | 1079.355 | 10.86645 |
| 10.89    | 1052.069 | 10.87388 | 1100.597 | 10.87716 | 1090.967 | 10.85957 | 1079.536 | 10.86951 |
| 10.89161 | 1051.827 | 10.87737 | 1101.02  | 10.88    | 1091.259 | 10.86352 | 1079.775 | 10.8735  |
| 10.8931  | 1051.605 | 10.88    | 1101.347 | 10.88387 | 1091.665 | 10.86671 | 1079.986 | 10.87667 |
| 10.89459 | 1051.384 | 10.88398 | 1101.85  | 10.88735 | 1092.051 | 10.8699  | 1080.207 | 10.87983 |
| 10.89608 | 1051.163 | 10.88755 | 1102.325 | 10.89    | 1092.355 | 10.87364 | 1080.473 | 10.88362 |
| 10.9     | 1050.589 | 10.89    | 1102.659 | 10.89397 | 1092.816 | 10.87692 | 1080.725 | 10.88688 |
| 10.9017  | 1050.341 | 10.89407 | 1103.222 | 10.89752 | 1093.254 | 10.88    | 1080.972 | 10.89    |
| 10.9033  | 1050.112 | 10.8977  | 1103.75  | 10.9     | 1093.567 | 10.88375 | 1081.279 | 10.89373 |
| 10.90489 | 1049.884 | 10.9     | 1104.091 | 10.90406 | 1094.088 | 10.88713 | 1081.577 | 10.89708 |
| 10.90648 | 1049.657 | 10.90415 | 1104.714 | 10.90768 | 1094.578 | 10.89    | 1081.839 | 10.9     |
| 10.91    | 1049.158 | 10.90783 | 1105.296 | 10.91    | 1094.9   | 10.89386 | 1082.199 | 10.90383 |
| 10.91182 | 1048.902 | 10.91    | 1105.646 | 10.91413 | 1095.483 | 10.89731 | 1082.544 | 10.90727 |
| 10.91351 | 1048.666 | 10.9142  | 1106.332 | 10.9178  | 1096.028 | 10.9     | 1082.821 | 10.91    |
| 10.9152  | 1048.432 | 10.92    | 1107.342 | 10.92    | 1096.361 | 10.90395 | 1083.236 | 10.91393 |
| 10.9169  | 1048.199 | 10.9242  | 1108.084 | 10.92419 | 1097.005 | 10.90749 | 1083.632 | 10.91744 |
| 10.92    | 1047.775 | 10.93    | 1109.173 | 10.92789 | 1097.605 | 10.91    | 1083.921 | 10.92    |
| 10.92194 | 1047.512 | 10.93163 | 1109.48  | 10.93    | 1097.953 | 10.91404 | 1084.395 | 10.92402 |
| 10.92373 | 1047.271 | 10.93313 | 1109.768 | 10.93422 | 1098.66  | 10.91764 | 1084.844 | 10.9276  |
| 10.92553 | 1047.031 | 10.93428 | 1109.991 | 10.94    | 1099.694 | 10.92    | 1085.145 | 10.93    |
| 10.92733 | 1046.793 | 10.93571 | 1110.267 | 10.94157 | 1099.977 | 10.92412 | 1085.68  | 10.93409 |
| 10.93    | 1046.441 | 10.93696 | 1110.513 | 10.94279 | 1100.198 | 10.92777 | 1086.183 | 10.93772 |
| 10.93205 | 1046.172 | 10.9387  | 1110.854 | 10.94423 | 1100.463 | 10.93    | 1086.498 | 10.94    |
| 10.93396 | 1045.926 | 10.94    | 1111.112 | 10.94554 | 1100.705 | 10.93417 | 1087.095 | 10.94415 |
| 10.93586 | 1045.682 | 10.94106 | 1111.325 | 10.94669 | 1100.918 | 10.93785 | 1087.653 | 10.94781 |
| 10.93777 | 1045.44  | 10.94219 | 1111.55  | 10.94814 | 1101.19  | 10.94    | 1087.984 | 10.95    |
| 10.94    | 1045.157 | 10.94384 | 1111.885 | 10.94963 | 1101.471 | 10.94421 | 1088.645 | 10.95419 |
| 10.94218 | 1044.884 | 10.94494 | 1112.109 | 10.95085 | 1101.703 | 10.94969 | 1089.567 | 10.95943 |
| 10.94419 | 1044.634 | 10.9463  | 1112.388 | 10.95226 | 1101.974 | 10.95093 | 1089.777 | 10.96043 |
| 10.9462  | 1044.387 | 10.94765 | 1112.668 | 10.95397 | 1102.305 | 10.95215 | 1089.986 | 10.96167 |
| 10.94821 | 1044.142 | 10.94901 | 1112.95  | 10.95501 | 1102.508 | 10.95359 | 1090.234 | 10.96312 |
| 10.95    | 1043.925 | 10.95019 | 1113.198 | 10.95605 | 1102.712 | 10.95488 | 1090.458 | 10.9643  |
| 10.9523  | 1043.647 | 10.95169 | 1113.513 | 10.95822 | 1103.142 | 10.95601 | 1090.655 | 10.96548 |
| 10.95442 | 1043.395 | 10.95311 | 1113.814 | 10.96    | 1103.497 | 10.95746 | 1090.91  | 10.96666 |
| 10.95654 | 1043.146 | 10.95506 | 1114.232 | 10.96118 | 1103.735 | 10.95895 | 1091.175 | 10.96772 |

|          |          |          |          |          |          |          |          |          |
|----------|----------|----------|----------|----------|----------|----------|----------|----------|
| 10.95867 | 1042.898 | 10.9563  | 1114.5   | 10.9627  | 1104.044 | 10.96    | 1091.363 | 10.96963 |
| 10.96    | 1042.744 | 10.95847 | 1114.973 | 10.96434 | 1104.38  | 10.96159 | 1091.651 | 10.97066 |
| 10.96243 | 1042.464 | 10.96    | 1115.31  | 10.9666  | 1104.847 | 10.96334 | 1091.97  | 10.97183 |
| 10.96466 | 1042.211 | 10.96248 | 1115.86  | 10.96804 | 1105.147 | 10.96442 | 1092.169 | 10.97344 |
| 10.9669  | 1041.96  | 10.96356 | 1116.101 | 10.97    | 1105.561 | 10.9655  | 1092.369 | 10.97446 |
| 10.96913 | 1041.712 | 10.96463 | 1116.343 | 10.97164 | 1105.909 | 10.96762 | 1092.767 | 10.97625 |
| 10.97032 | 1041.58  | 10.96571 | 1116.587 | 10.97308 | 1106.218 | 10.96975 | 1093.169 | 10.97734 |
| 10.97255 | 1041.335 | 10.96818 | 1117.154 | 10.97428 | 1106.478 | 10.97117 | 1093.439 | 10.97899 |
| 10.9749  | 1041.081 | 10.97    | 1117.577 | 10.97548 | 1106.74  | 10.97268 | 1093.731 | 10.98    |
| 10.97725 | 1040.831 | 10.97282 | 1118.234 | 10.97739 | 1107.16  | 10.97436 | 1094.059 | 10.98177 |
| 10.9796  | 1040.583 | 10.97553 | 1118.878 | 10.9793  | 1107.584 | 10.97668 | 1094.516 | 10.98305 |
| 10.98269 | 1040.261 | 10.97823 | 1119.529 | 10.98218 | 1108.229 | 10.97816 | 1094.81  | 10.98538 |
| 10.98515 | 1040.009 | 10.98    | 1119.958 | 10.98495 | 1108.862 | 10.98    | 1095.179 | 10.98689 |
| 10.98762 | 1039.76  | 10.98309 | 1120.713 | 10.98772 | 1109.503 | 10.98169 | 1095.52  | 10.99    |
| 10.99    | 1039.522 | 10.9858  | 1121.389 | 10.99    | 1110.037 | 10.98316 | 1095.824 | 10.99173 |
| 10.99282 | 1039.243 | 10.98823 | 1122.003 | 10.99316 | 1110.784 | 10.9844  | 1096.078 | 10.99324 |
| 10.9954  | 1038.994 | 10.99    | 1122.453 | 10.99593 | 1111.452 | 10.9863  | 1096.475 | 10.99444 |
| 10.99799 | 1038.748 | 10.99278 | 1123.164 | 10.99843 | 1112.06  | 10.9882  | 1096.876 | 10.99563 |
| 11       | 1038.559 | 10.9938  | 1123.428 | 11       | 1112.448 | 10.99    | 1097.26  | 10.99758 |
| 11.00295 | 1038.283 | 10.99497 | 1123.731 | 11.00134 | 1112.779 | 10.99217 | 1097.725 | 10.99952 |
| 11.00566 | 1038.038 | 10.99606 | 1124.016 | 11.00247 | 1113.058 | 10.99483 | 1098.307 | 11.00223 |
| 11.00837 | 1037.797 | 10.99751 | 1124.397 | 11.00357 | 1113.334 | 10.9975  | 1098.897 | 11.00471 |
| 11.01    | 1037.652 | 10.99866 | 1124.7   | 11.00503 | 1113.7   | 11       | 1099.459 | 11.0072  |
| 11.01309 | 1037.382 | 10.99973 | 1124.983 | 11.00605 | 1113.958 | 11.00304 | 1100.147 | 11.00969 |
| 11.01592 | 1037.142 | 11.00081 | 1125.268 | 11.0073  | 1114.274 | 11.00543 | 1100.699 | 11.01284 |
| 11.01875 | 1036.907 | 11.00217 | 1125.63  | 11.00886 | 1114.67  | 11.00782 | 1101.257 | 11.01515 |
| 11.02    | 1036.804 | 11.00352 | 1125.992 | 11.00992 | 1114.941 | 11.00918 | 1101.578 | 11.01729 |
| 11.02323 | 1036.541 | 11.00578 | 1126.599 | 11.01147 | 1115.339 | 11.01054 | 1101.901 | 11.01859 |
| 11.02618 | 1036.309 | 11.00712 | 1126.959 | 11.01318 | 1115.778 | 11.0119  | 1102.225 | 11.01996 |
| 11.02914 | 1036.082 | 11.00871 | 1127.392 | 11.01433 | 1116.076 | 11.0136  | 1102.631 | 11.02134 |
| 11.03042 | 1035.985 | 11.00995 | 1127.658 | 11.0163  | 1116.588 | 11.01502 | 1102.973 | 11.02243 |
| 11.03337 | 1035.762 | 11.01128 | 1127.768 | 11.01788 | 1117.002 | 11.01625 | 1103.272 | 11.02405 |
| 11.03645 | 1035.54  | 11.01236 | 1127.738 | 11.01947 | 1117.418 | 11.0174  | 1103.551 | 11.02593 |
| 11.03953 | 1035.323 | 11.01433 | 1127.724 | 11.02047 | 1117.682 | 11.0195  | 1104.065 | 11.02699 |
| 11.04352 | 1035.047 | 11.01562 | 1127.805 | 11.02163 | 1117.99  | 11.02071 | 1104.36  | 11.02804 |
| 11.04672 | 1034.837 | 11.01691 | 1127.945 | 11.02292 | 1118.331 | 11.02203 | 1104.687 | 11.03    |
| 11.04993 | 1034.633 | 11.01869 | 1128.143 | 11.02435 | 1118.6   | 11.02378 | 1105.119 | 11.03102 |
| 11.05366 | 1034.398 | 11.02    | 1128.256 | 11.02614 | 1118.66  | 11.02537 | 1105.515 | 11.03224 |
| 11.05699 | 1034.202 | 11.02101 | 1128.306 | 11.02737 | 1118.628 | 11.0268  | 1105.873 | 11.03438 |
| 11.06    | 1034.03  | 11.02232 | 1128.356 | 11.0286  | 1118.621 | 11.02877 | 1106.368 | 11.0363  |
| 11.06381 | 1033.817 | 11.02382 | 1128.439 | 11.02983 | 1118.685 | 11.03    | 1106.679 | 11.03822 |
| 11.06726 | 1033.636 | 11.02588 | 1128.594 | 11.03088 | 1118.805 | 11.03149 | 1107.058 | 11.04    |
| 11.07    | 1033.498 | 11.02719 | 1128.7   | 11.03244 | 1118.985 | 11.03274 | 1107.375 | 11.041   |
| 11.07395 | 1033.304 | 11.02948 | 1128.869 | 11.03458 | 1119.132 | 11.03445 | 1107.814 | 11.04227 |
| 11.07754 | 1033.142 | 11.03239 | 1129.062 | 11.03595 | 1119.191 | 11.03554 | 1108.094 | 11.04361 |
| 11.08    | 1033.035 | 11.0341  | 1129.181 | 11.03834 | 1119.315 | 11.03745 | 1108.586 | 11.04544 |
| 11.0841  | 1032.862 | 11.03639 | 1129.346 | 11.04    | 1119.426 | 11.03888 | 1108.939 | 11.04661 |

|          |          |          |          |          |          |          |          |          |
|----------|----------|----------|----------|----------|----------|----------|----------|----------|
| 11.08782 | 1032.721 | 11.03864 | 1129.509 | 11.04249 | 1119.614 | 11.04    | 1109.053 | 11.04866 |
| 11.09    | 1032.643 | 11.04    | 1129.608 | 11.04464 | 1119.76  | 11.04174 | 1109.028 | 11.05    |
| 11.09425 | 1032.494 | 11.04257 | 1129.794 | 11.04652 | 1119.883 | 11.04378 | 1109.038 | 11.05136 |
| 11.1     | 1032.328 | 11.04482 | 1129.958 | 11.04839 | 1120.007 | 11.04488 | 1109.109 | 11.05256 |
| 11.10425 | 1032.211 | 11.04662 | 1130.091 | 11.05    | 1120.115 | 11.04599 | 1109.199 | 11.05375 |
| 11.11    | 1032.089 | 11.04843 | 1130.224 | 11.05214 | 1120.26  | 11.0471  | 1109.288 | 11.05481 |
| 11.11425 | 1032.005 | 11.05    | 1130.341 | 11.05401 | 1120.389 | 11.04899 | 1109.415 | 11.05589 |
| 11.12    | 1031.928 | 11.05206 | 1130.494 | 11.0557  | 1120.505 | 11.05    | 1109.475 | 11.05761 |
| 11.12425 | 1031.878 | 11.05397 | 1130.637 | 11.05738 | 1120.621 | 11.05217 | 1109.6   | 11.05909 |
| 11.13    | 1031.848 | 11.05587 | 1130.78  | 11.05907 | 1120.738 | 11.05399 | 1109.705 | 11.06021 |
| 11.13425 | 1031.832 | 11.06    | 1131.094 | 11.06024 | 1120.819 | 11.0557  | 1109.811 | 11.0617  |
| 11.14    | 1031.85  | 11.06218 | 1131.26  | 11.06193 | 1120.937 | 11.05741 | 1109.92  | 11.06329 |
| 11.14425 | 1031.87  | 11.06777 | 1131.694 | 11.06529 | 1121.174 | 11.05912 | 1110.028 | 11.06488 |
| 11.15    | 1031.938 | 11.07    | 1131.868 | 11.06769 | 1121.345 | 11.06024 | 1110.098 | 11.06647 |
| 11.15425 | 1031.996 | 11.07639 | 1132.37  | 11.07    | 1121.51  | 11.06196 | 1110.206 | 11.07    |
| 11.16    | 1032.116 | 11.08    | 1132.659 | 11.07275 | 1121.707 | 11.06353 | 1110.304 | 11.07182 |
| 11.16425 | 1032.211 | 11.08639 | 1133.173 | 11.08    | 1122.24  | 11.06511 | 1110.404 | 11.07339 |
| 11.17    | 1032.384 | 11.09    | 1133.469 | 11.08275 | 1122.442 | 11.06668 | 1110.505 | 11.07497 |
| 11.17425 | 1032.519 | 11.09639 | 1133.995 | 11.09    | 1122.99  | 11.07    | 1110.718 | 11.0772  |
| 11.18    | 1032.748 | 11.1     | 1134.298 | 11.09275 | 1123.198 | 11.0718  | 1110.835 | 11.07942 |
| 11.18425 | 1032.924 | 11.10639 | 1134.838 | 11.1     | 1123.761 | 11.07552 | 1111.079 | 11.08255 |
| 11.18541 | 1032.975 | 11.11    | 1135.148 | 11.10275 | 1123.974 | 11.07833 | 1111.264 | 11.08691 |
| 11.18743 | 1033.068 | 11.11639 | 1135.7   | 11.11    | 1124.551 | 11.08    | 1111.376 | 11.09    |
| 11.18849 | 1033.118 | 11.12    | 1136.018 | 11.11275 | 1124.771 | 11.08321 | 1111.59  | 11.09499 |
| 11.18954 | 1033.168 | 11.12639 | 1136.583 | 11.12    | 1125.363 | 11.09    | 1112.056 | 11.1     |
| 11.19067 | 1033.223 | 11.13    | 1136.908 | 11.12275 | 1125.588 | 11.09321 | 1112.277 | 11.10499 |
| 11.19182 | 1033.279 | 11.13639 | 1137.487 | 11.13    | 1126.195 | 11.1     | 1112.757 | 11.11    |
| 11.1934  | 1033.359 | 11.14    | 1137.819 | 11.13275 | 1126.426 | 11.10321 | 1112.984 | 11.11499 |
| 11.19505 | 1033.446 | 11.14639 | 1138.411 | 11.14    | 1127.048 | 11.11    | 1113.478 | 11.12    |
| 11.19733 | 1033.568 | 11.15    | 1138.751 | 11.14275 | 1127.285 | 11.11321 | 1113.713 | 11.12499 |
| 11.19864 | 1033.639 | 11.15639 | 1139.355 | 11.15    | 1127.923 | 11.12    | 1114.221 | 11.13    |
| 11.2     | 1033.715 | 11.16    | 1139.703 | 11.15275 | 1128.165 | 11.12321 | 1114.462 | 11.13499 |
| 11.20149 | 1033.8   | 11.16639 | 1140.321 | 11.16    | 1128.819 | 11.13    | 1114.985 | 11.14    |
| 11.20307 | 1033.892 | 11.17    | 1140.677 | 11.16275 | 1129.067 | 11.13321 | 1115.233 | 11.14499 |
| 11.2046  | 1033.983 | 11.17639 | 1141.309 | 11.17    | 1129.736 | 11.14    | 1115.77  | 11.15    |
| 11.20632 | 1034.087 | 11.18    | 1141.672 | 11.17275 | 1129.99  | 11.14321 | 1116.025 | 11.15499 |
| 11.20752 | 1034.161 | 11.18639 | 1142.317 | 11.18    | 1130.675 | 11.15    | 1116.577 | 11.16    |
| 11.20901 | 1034.255 | 11.19    | 1142.688 | 11.18275 | 1130.935 | 11.15321 | 1116.838 | 11.16499 |
| 11.21021 | 1034.332 | 11.19639 | 1143.347 | 11.19    | 1131.636 | 11.16    | 1117.405 | 11.17    |
| 11.21156 | 1034.42  | 11.2     | 1143.726 | 11.19275 | 1131.902 | 11.16321 | 1117.674 | 11.17499 |
| 11.21275 | 1034.499 | 11.20639 | 1144.399 | 11.2     | 1132.619 | 11.17    | 1118.256 | 11.18    |
| 11.21394 | 1034.579 | 11.21    | 1144.786 | 11.20275 | 1132.892 | 11.17321 | 1118.531 | 11.18499 |
| 11.21514 | 1034.661 | 11.21639 | 1145.473 | 11.21    | 1133.625 | 11.18    | 1119.128 | 11.19    |
| 11.21775 | 1034.842 | 11.22    | 1145.868 | 11.21275 | 1133.903 | 11.18321 | 1119.411 | 11.19499 |
| 11.22    | 1035.003 | 11.22639 | 1146.569 | 11.22    | 1134.653 | 11.19    | 1120.023 | 11.2     |
| 11.22116 | 1035.087 | 11.22753 | 1146.695 | 11.22275 | 1134.937 | 11.19321 | 1120.313 | 11.20499 |
| 11.22258 | 1035.193 | 11.22883 | 1146.839 | 11.23    | 1135.703 | 11.2     | 1120.941 | 11.21    |

|          |          |          |          |          |          |          |          |          |
|----------|----------|----------|----------|----------|----------|----------|----------|----------|
| 11.22365 | 1035.273 | 11.23    | 1146.966 | 11.23275 | 1135.994 | 11.20321 | 1121.238 | 11.21499 |
| 11.22541 | 1035.406 | 11.2313  | 1147.103 | 11.24    | 1136.777 | 11.21    | 1121.881 | 11.22    |
| 11.22717 | 1035.541 | 11.23255 | 1147.222 | 11.24275 | 1137.074 | 11.21321 | 1122.185 | 11.22499 |
| 11.22836 | 1035.633 | 11.23379 | 1147.333 | 11.24874 | 1137.733 | 11.22    | 1122.843 | 11.23    |
| 11.23    | 1035.761 | 11.23504 | 1147.435 | 11.24974 | 1137.843 | 11.22321 | 1123.155 | 11.23499 |
| 11.23133 | 1035.865 | 11.23939 | 1147.742 | 11.25104 | 1137.986 | 11.23    | 1123.829 | 11.24    |
| 11.23255 | 1035.962 | 11.24062 | 1147.813 | 11.25439 | 1138.359 | 11.23321 | 1124.148 | 11.24499 |
| 11.23421 | 1036.094 | 11.24239 | 1147.901 | 11.26    | 1138.989 | 11.24    | 1124.838 | 11.24872 |
| 11.23595 | 1036.233 | 11.24351 | 1147.952 | 11.26383 | 1139.422 | 11.24321 | 1125.165 | 11.24976 |
| 11.23724 | 1036.337 | 11.24547 | 1148.035 | 11.26856 | 1139.962 | 11.24874 | 1125.738 | 11.25137 |
| 11.2384  | 1036.432 | 11.24744 | 1148.116 | 11.27    | 1140.128 | 11.24977 | 1125.844 | 11.25645 |
| 11.23944 | 1036.517 | 11.24874 | 1148.169 | 11.27535 | 1140.747 | 11.25109 | 1125.983 | 11.26    |
| 11.2406  | 1036.612 | 11.24983 | 1148.213 | 11.28    | 1141.291 | 11.25492 | 1126.385 | 11.26581 |
| 11.24194 | 1036.724 | 11.25128 | 1148.272 | 11.28525 | 1141.908 | 11.26    | 1126.924 | 11.26854 |
| 11.24338 | 1036.844 | 11.25294 | 1148.339 | 11.29    | 1142.475 | 11.26438 | 1127.391 | 11.27    |
| 11.24441 | 1036.93  | 11.2546  | 1148.405 | 11.29525 | 1143.104 | 11.26855 | 1127.842 | 11.2723  |
| 11.2457  | 1037.039 | 11.25626 | 1148.468 | 11.3     | 1143.681 | 11.27    | 1127.999 | 11.28    |
| 11.24699 | 1037.149 | 11.26    | 1148.601 | 11.30525 | 1144.323 | 11.27447 | 1128.488 | 11.28226 |
| 11.24828 | 1037.26  | 11.2619  | 1148.662 | 11.31    | 1144.912 | 11.28    | 1129.1   | 11.29    |
| 11.24928 | 1037.346 | 11.26493 | 1148.734 | 11.31525 | 1145.566 | 11.28439 | 1129.589 | 11.29226 |
| 11.25132 | 1037.522 | 11.26738 | 1148.78  | 11.31841 | 1145.963 | 11.29    | 1130.223 | 11.3     |
| 11.25244 | 1037.62  | 11.26866 | 1148.801 | 11.32    | 1146.163 | 11.29439 | 1130.722 | 11.30226 |
| 11.25432 | 1037.785 | 11.27    | 1148.822 | 11.32177 | 1146.376 | 11.3     | 1131.37  | 11.31    |
| 11.25622 | 1037.953 | 11.27149 | 1148.84  | 11.32303 | 1146.515 | 11.30439 | 1131.879 | 11.31226 |
| 11.25968 | 1038.263 | 11.27685 | 1148.88  | 11.32417 | 1146.634 | 11.31    | 1132.54  | 11.32    |
| 11.26075 | 1038.36  | 11.28    | 1148.899 | 11.32537 | 1146.75  | 11.31439 | 1133.06  | 11.32226 |
| 11.26214 | 1038.486 | 11.28188 | 1148.91  | 11.32658 | 1146.858 | 11.32    | 1133.734 | 11.33    |
| 11.26335 | 1038.598 | 11.28383 | 1148.92  | 11.32778 | 1146.957 | 11.32439 | 1134.265 | 11.33226 |
| 11.26457 | 1038.709 | 11.28724 | 1148.934 | 11.32929 | 1147.074 | 11.33    | 1134.953 | 11.34    |
| 11.26669 | 1038.907 | 11.29    | 1148.944 | 11.33157 | 1147.225 | 11.33439 | 1135.493 | 11.34226 |
| 11.26881 | 1039.106 | 11.2939  | 1148.955 | 11.3327  | 1147.291 | 11.34    | 1136.195 | 11.35    |
| 11.27    | 1039.218 | 11.29919 | 1148.958 | 11.33382 | 1147.354 | 11.34439 | 1136.746 | 11.35226 |
| 11.27221 | 1039.429 | 11.30076 | 1148.958 | 11.33777 | 1147.551 | 11.35    | 1137.462 | 11.36    |
| 11.2736  | 1039.561 | 11.30605 | 1148.955 | 11.34    | 1147.658 | 11.35439 | 1138.024 | 11.36226 |
| 11.27573 | 1039.768 | 11.31    | 1148.947 | 11.34451 | 1147.87  | 11.36    | 1138.753 | 11.37    |
| 11.27787 | 1039.976 | 11.31605 | 1148.933 | 11.34774 | 1148.014 | 11.36439 | 1139.326 | 11.37226 |
| 11.28    | 1040.185 | 11.32    | 1148.923 | 11.35    | 1148.108 | 11.37    | 1140.069 | 11.38    |
| 11.28244 | 1040.426 | 11.32605 | 1148.907 | 11.35111 | 1148.151 | 11.37439 | 1140.653 | 11.38226 |
| 11.2846  | 1040.642 | 11.33    | 1148.897 | 11.35225 | 1148.193 | 11.38    | 1141.41  | 11.39    |
| 11.28676 | 1040.861 | 11.33605 | 1148.88  | 11.35424 | 1148.257 | 11.38439 | 1142.004 | 11.39226 |
| 11.28891 | 1041.081 | 11.34    | 1148.868 | 11.35623 | 1148.312 | 11.39    | 1142.775 | 11.4     |
| 11.29    | 1041.192 | 11.34605 | 1148.85  | 11.35972 | 1148.383 | 11.39439 | 1143.381 | 11.40226 |
| 11.29247 | 1041.445 | 11.35    | 1148.838 | 11.36398 | 1148.454 | 11.4     | 1144.166 | 11.41    |
| 11.29613 | 1041.83  | 11.35605 | 1148.82  | 11.37    | 1148.502 | 11.40439 | 1144.783 | 11.41226 |
| 11.29896 | 1042.131 | 11.36    | 1148.809 | 11.37398 | 1148.531 | 11.40787 | 1145.278 | 11.42    |
| 11.3     | 1042.241 | 11.36605 | 1148.792 | 11.37664 | 1148.546 | 11.41    | 1145.577 | 11.42226 |
| 11.30324 | 1042.588 | 11.37    | 1148.781 | 11.3793  | 1148.56  | 11.41168 | 1145.802 | 11.43    |

|          |          |          |          |          |          |          |          |          |
|----------|----------|----------|----------|----------|----------|----------|----------|----------|
| 11.31    | 1043.335 | 11.37605 | 1148.765 | 11.38038 | 1148.566 | 11.41279 | 1145.939 | 11.43226 |
| 11.31324 | 1043.696 | 11.38    | 1148.754 | 11.38304 | 1148.579 | 11.41383 | 1146.061 | 11.44    |
| 11.32    | 1044.47  | 11.38605 | 1148.738 | 11.38735 | 1148.591 | 11.41494 | 1146.182 | 11.44226 |
| 11.32324 | 1044.844 | 11.39    | 1148.727 | 11.39    | 1148.596 | 11.41606 | 1146.295 | 11.45    |
| 11.33    | 1045.646 | 11.39605 | 1148.712 | 11.39493 | 1148.601 | 11.41718 | 1146.399 | 11.45226 |
| 11.33324 | 1046.033 | 11.4     | 1148.702 | 11.4     | 1148.596 | 11.41857 | 1146.522 | 11.46    |
| 11.34    | 1046.863 | 11.40605 | 1148.687 | 11.40493 | 1148.588 | 11.42    | 1146.637 | 11.46226 |
| 11.34324 | 1047.263 | 11.41    | 1148.678 | 11.41    | 1148.579 | 11.42145 | 1146.738 | 11.47    |
| 11.35    | 1048.12  | 11.41605 | 1148.663 | 11.41493 | 1148.57  | 11.42251 | 1146.807 | 11.47226 |
| 11.35324 | 1048.533 | 11.42    | 1148.654 | 11.42    | 1148.561 | 11.42358 | 1146.871 | 11.48    |
| 11.36    | 1049.418 | 11.42605 | 1148.64  | 11.42493 | 1148.551 | 11.42729 | 1147.08  | 11.48226 |
| 11.36324 | 1049.844 | 11.43    | 1148.631 | 11.43    | 1148.54  | 11.43    | 1147.228 | 11.49    |
| 11.37    | 1050.757 | 11.43605 | 1148.617 | 11.43493 | 1148.529 | 11.43118 | 1147.291 | 11.49226 |
| 11.37324 | 1051.196 | 11.44    | 1148.609 | 11.44    | 1148.518 | 11.43232 | 1147.352 | 11.49443 |
| 11.38    | 1052.136 | 11.44605 | 1148.595 | 11.44493 | 1148.506 | 11.43432 | 1147.455 | 11.49692 |
| 11.38324 | 1052.589 | 11.45    | 1148.587 | 11.45    | 1148.495 | 11.43603 | 1147.541 | 11.49822 |
| 11.39    | 1053.556 | 11.45605 | 1148.574 | 11.45493 | 1148.485 | 11.43773 | 1147.622 | 11.5     |
| 11.39324 | 1054.022 | 11.46    | 1148.566 | 11.46    | 1148.475 | 11.43944 | 1147.699 | 11.5015  |
| 11.4     | 1055.017 | 11.46605 | 1148.554 | 11.46493 | 1148.465 | 11.44195 | 1147.805 | 11.5028  |
| 11.40324 | 1055.496 | 11.47    | 1148.546 | 11.47    | 1148.455 | 11.44474 | 1147.898 | 11.50386 |
| 11.41    | 1056.518 | 11.47605 | 1148.534 | 11.47493 | 1148.445 | 11.44682 | 1147.957 | 11.50491 |
| 11.41324 | 1057.011 | 11.48    | 1148.526 | 11.48    | 1148.435 | 11.45    | 1148.027 | 11.50597 |
| 11.42    | 1058.061 | 11.48605 | 1148.514 | 11.48493 | 1148.426 | 11.45238 | 1148.075 | 11.50813 |
| 11.42324 | 1058.566 | 11.49    | 1148.507 | 11.49    | 1148.417 | 11.45548 | 1148.119 | 11.51    |
| 11.43    | 1059.644 | 11.49605 | 1148.496 | 11.49493 | 1148.408 | 11.46    | 1148.168 | 11.51226 |
| 11.43324 | 1060.162 | 11.5     | 1148.489 | 11.5     | 1148.399 | 11.46355 | 1148.204 | 11.51389 |
| 11.44    | 1061.268 | 11.50605 | 1148.478 | 11.50493 | 1148.391 | 11.46665 | 1148.229 | 11.51541 |
| 11.44324 | 1061.8   | 11.51    | 1148.471 | 11.51    | 1148.382 | 11.46944 | 1148.249 | 11.51699 |
| 11.45    | 1062.932 | 11.51605 | 1148.461 | 11.51493 | 1148.374 | 11.47319 | 1148.273 | 11.51858 |
| 11.45324 | 1063.477 | 11.52    | 1148.454 | 11.52    | 1148.366 | 11.4778  | 1148.289 | 11.52    |
| 11.46    | 1064.638 | 11.52605 | 1148.444 | 11.52493 | 1148.358 | 11.48    | 1148.295 | 11.52181 |
| 11.46324 | 1065.196 | 11.53    | 1148.438 | 11.53    | 1148.35  | 11.48527 | 1148.305 | 11.52339 |
| 11.47    | 1066.384 | 11.53103 | 1148.436 | 11.53103 | 1148.349 | 11.49    | 1148.304 | 11.52469 |
| 11.47324 | 1066.956 | 11.53323 | 1148.432 | 11.53439 | 1148.344 | 11.49527 | 1148.302 | 11.52599 |
| 11.48    | 1068.171 | 11.54    | 1148.422 | 11.54    | 1148.335 | 11.5     | 1148.297 | 11.52729 |
| 11.48324 | 1068.756 | 11.54217 | 1148.418 | 11.5433  | 1148.331 | 11.50527 | 1148.292 | 11.53    |
| 11.49    | 1069.999 | 11.55    | 1148.407 | 11.55    | 1148.321 | 11.51    | 1148.287 | 11.53101 |
| 11.49324 | 1070.597 | 11.55217 | 1148.404 | 11.5533  | 1148.316 | 11.51527 | 1148.28  | 11.53652 |
| 11.5     | 1071.868 | 11.56    | 1148.392 | 11.56    | 1148.307 | 11.52    | 1148.273 | 11.54    |
| 11.50324 | 1072.479 | 11.56217 | 1148.389 | 11.5633  | 1148.303 | 11.52527 | 1148.264 | 11.54521 |
| 11.51    | 1073.778 | 11.57    | 1148.378 | 11.57    | 1148.294 | 11.53    | 1148.256 | 11.54798 |
| 11.51324 | 1074.402 | 11.57217 | 1148.375 | 11.5733  | 1148.29  | 11.53103 | 1148.255 | 11.55    |
| 11.52    | 1075.729 | 11.58    | 1148.365 | 11.58    | 1148.282 | 11.53405 | 1148.25  | 11.55317 |
| 11.52324 | 1076.366 | 11.58217 | 1148.362 | 11.5833  | 1148.277 | 11.54    | 1148.241 | 11.55594 |
| 11.53    | 1077.72  | 11.59    | 1148.352 | 11.59    | 1148.269 | 11.54297 | 1148.237 | 11.55824 |
| 11.53146 | 1078.013 | 11.59217 | 1148.35  | 11.5933  | 1148.266 | 11.55    | 1148.227 | 11.56    |
| 11.5349  | 1078.709 | 11.6     | 1148.34  | 11.6     | 1148.258 | 11.55297 | 1148.223 | 11.56263 |

|          |          |          |          |         |          |          |          |          |
|----------|----------|----------|----------|---------|----------|----------|----------|----------|
| 11.54    | 1079.752 | 11.60217 | 1148.337 | 11.6033 | 1148.254 | 11.56    | 1148.214 | 11.56753 |
| 11.54393 | 1080.558 | 11.61    | 1148.328 | 11.61   | 1148.247 | 11.56297 | 1148.21  | 11.57    |
| 11.55    | 1081.823 | 11.61217 | 1148.326 | 11.6133 | 1148.243 | 11.57    | 1148.201 | 11.5756  |
| 11.55393 | 1082.646 | 11.62    | 1148.317 | 11.62   | 1148.237 | 11.57297 | 1148.197 | 11.58    |
| 11.56    | 1083.936 | 11.62217 | 1148.315 | 11.6233 | 1148.233 | 11.58    | 1148.189 | 11.5856  |
| 11.56393 | 1084.775 | 11.63    | 1148.307 | 11.63   | 1148.227 | 11.58297 | 1148.185 | 11.59    |
| 11.57    | 1086.09  | 11.63217 | 1148.304 | 11.6333 | 1148.223 | 11.59    | 1148.177 | 11.5956  |
| 11.57393 | 1086.945 | 11.64    | 1148.297 | 11.64   | 1148.217 | 11.59297 | 1148.174 | 11.6     |
| 11.58    | 1088.285 | 11.64217 | 1148.294 | 11.6433 | 1148.214 | 11.6     | 1148.166 | 11.6056  |
| 11.58393 | 1089.156 | 11.65    | 1148.287 | 11.65   | 1148.208 | 11.60297 | 1148.163 | 11.61    |
| 11.59    | 1090.521 | 11.65217 | 1148.285 | 11.6533 | 1148.206 | 11.61    | 1148.156 | 11.6156  |
| 11.59202 | 1090.976 | 11.66    | 1148.278 | 11.66   | 1148.2   | 11.61297 | 1148.153 | 11.62    |
| 11.59377 | 1091.371 | 11.66217 | 1148.276 | 11.6633 | 1148.197 | 11.62    | 1148.147 | 11.6256  |
| 11.6     | 1092.799 | 11.67    | 1148.269 | 11.67   | 1148.192 | 11.62297 | 1148.144 | 11.63    |
| 11.60175 | 1093.199 | 11.67217 | 1148.268 | 11.6733 | 1148.19  | 11.63    | 1148.138 | 11.6356  |
| 11.61    | 1095.125 | 11.68    | 1148.261 | 11.68   | 1148.185 | 11.63297 | 1148.135 | 11.64    |
| 11.61175 | 1095.532 | 11.68217 | 1148.26  | 11.6833 | 1148.182 | 11.64    | 1148.129 | 11.6456  |
| 11.61416 | 1096.101 | 11.69    | 1148.254 | 11.69   | 1148.178 | 11.64297 | 1148.127 | 11.65    |
| 11.61524 | 1096.353 | 11.69217 | 1148.252 | 11.6933 | 1148.176 | 11.65    | 1148.121 | 11.6556  |
| 11.61642 | 1096.632 | 11.7     | 1148.246 | 11.7    | 1148.171 | 11.65297 | 1148.119 | 11.66    |
| 11.61755 | 1096.899 | 11.70217 | 1148.245 | 11.7033 | 1148.169 | 11.66    | 1148.113 | 11.6656  |
| 11.61932 | 1097.317 | 11.71    | 1148.24  | 11.71   | 1148.165 | 11.66297 | 1148.111 | 11.67    |
| 11.62112 | 1097.746 | 11.71217 | 1148.238 | 11.7133 | 1148.164 | 11.67    | 1148.106 | 11.6756  |
| 11.62798 | 1099.398 | 11.72    | 1148.233 | 11.72   | 1148.16  | 11.67297 | 1148.104 | 11.68    |
| 11.63    | 1099.885 | 11.72217 | 1148.232 | 11.7233 | 1148.158 | 11.68    | 1148.1   | 11.6856  |
| 11.63784 | 1101.79  | 11.73    | 1148.228 | 11.73   | 1148.155 | 11.68297 | 1148.098 | 11.69    |
| 11.64    | 1102.32  | 11.73217 | 1148.226 | 11.7333 | 1148.153 | 11.69    | 1148.094 | 11.6956  |
| 11.64784 | 1104.258 | 11.74    | 1148.222 | 11.74   | 1148.15  | 11.69297 | 1148.092 | 11.7     |
| 11.65    | 1104.797 | 11.74217 | 1148.221 | 11.7433 | 1148.148 | 11.7     | 1148.088 | 11.7056  |
| 11.65784 | 1106.769 | 11.75    | 1148.217 | 11.75   | 1148.146 | 11.70297 | 1148.086 | 11.71    |
| 11.66    | 1107.317 | 11.75217 | 1148.216 | 11.7533 | 1148.144 | 11.71    | 1148.083 | 11.7156  |
| 11.66784 | 1109.322 | 11.76    | 1148.212 | 11.76   | 1148.142 | 11.71297 | 1148.081 | 11.72    |
| 11.67    | 1109.879 | 11.76217 | 1148.211 | 11.7633 | 1148.14  | 11.72    | 1148.078 | 11.7256  |
| 11.67784 | 1111.918 | 11.77    | 1148.208 | 11.77   | 1148.138 | 11.72297 | 1148.077 | 11.73    |
| 11.68    | 1112.485 | 11.77217 | 1148.207 | 11.7733 | 1148.137 | 11.73    | 1148.074 | 11.7356  |
| 11.68784 | 1114.557 | 11.78    | 1148.204 | 11.78   | 1148.135 | 11.73297 | 1148.073 | 11.74    |
| 11.69    | 1115.133 | 11.78217 | 1148.203 | 11.7833 | 1148.134 | 11.74    | 1148.07  | 11.7456  |
| 11.69784 | 1117.24  | 11.79    | 1148.2   | 11.79   | 1148.132 | 11.74297 | 1148.069 | 11.75    |
| 11.7     | 1117.826 | 11.79217 | 1148.2   | 11.7933 | 1148.131 | 11.75    | 1148.066 | 11.7556  |
| 11.70784 | 1119.968 | 11.8     | 1148.197 | 11.8    | 1148.129 | 11.75297 | 1148.065 | 11.76    |
| 11.70959 | 1120.449 | 11.80217 | 1148.196 | 11.8033 | 1148.128 | 11.76    | 1148.063 | 11.7656  |
| 11.71213 | 1121.152 | 11.81    | 1148.194 | 11.81   | 1148.127 | 11.76297 | 1148.062 | 11.77    |
| 11.71973 | 1123.283 | 11.81217 | 1148.193 | 11.8133 | 1148.126 | 11.77    | 1148.06  | 11.7756  |
| 11.72109 | 1123.665 | 11.82    | 1148.191 | 11.82   | 1148.125 | 11.77297 | 1148.059 | 11.78    |
| 11.72869 | 1125.812 | 11.82217 | 1148.191 | 11.8233 | 1148.124 | 11.78    | 1148.058 | 11.7856  |
| 11.73    | 1126.186 | 11.83    | 1148.189 | 11.83   | 1148.123 | 11.78297 | 1148.057 | 11.79    |
| 11.73138 | 1126.564 | 11.83217 | 1148.188 | 11.8333 | 1148.122 | 11.79    | 1148.056 | 11.7956  |



|          |          |          |          |          |          |          |          |         |
|----------|----------|----------|----------|----------|----------|----------|----------|---------|
| 11.73295 | 1126.912 | 11.84    | 1148.187 | 11.84    | 1148.121 | 11.79297 | 1148.055 | 11.8    |
| 11.73453 | 1127.237 | 11.84217 | 1148.186 | 11.8433  | 1148.121 | 11.8     | 1148.054 | 11.8056 |
| 11.73831 | 1128.057 | 11.85    | 1148.185 | 11.85    | 1148.12  | 11.80297 | 1148.053 | 11.81   |
| 11.74    | 1128.43  | 11.85217 | 1148.184 | 11.8533  | 1148.12  | 11.81    | 1148.052 | 11.8156 |
| 11.74433 | 1129.393 | 11.86    | 1148.183 | 11.86    | 1148.119 | 11.81297 | 1148.052 | 11.82   |
| 11.75    | 1130.658 | 11.86217 | 1148.183 | 11.8633  | 1148.119 | 11.82    | 1148.051 | 11.8256 |
| 11.75433 | 1131.622 | 11.87    | 1148.181 | 11.87    | 1148.118 | 11.82297 | 1148.05  | 11.83   |
| 11.76    | 1132.892 | 11.87217 | 1148.181 | 11.8733  | 1148.118 | 11.83    | 1148.05  | 11.8356 |
| 11.76433 | 1133.863 | 11.88    | 1148.18  | 11.88    | 1148.118 | 11.83297 | 1148.05  | 11.84   |
| 11.77    | 1135.14  | 11.88217 | 1148.18  | 11.8833  | 1148.117 | 11.84    | 1148.049 | 11.8456 |
| 11.77433 | 1136.115 | 11.89    | 1148.179 | 11.89    | 1148.117 | 11.84297 | 1148.049 | 11.85   |
| 11.78    | 1137.398 | 11.89217 | 1148.179 | 11.8933  | 1148.117 | 11.85    | 1148.048 | 11.8556 |
| 11.78433 | 1138.379 | 11.9     | 1148.178 | 11.9     | 1148.117 | 11.85297 | 1148.048 | 11.86   |
| 11.79    | 1139.668 | 11.90217 | 1148.178 | 11.9033  | 1148.117 | 11.86    | 1148.048 | 11.8656 |
| 11.79433 | 1140.653 | 11.91    | 1148.177 | 11.91    | 1148.117 | 11.86297 | 1148.048 | 11.87   |
| 11.79895 | 1141.706 | 11.91217 | 1148.177 | 11.9133  | 1148.117 | 11.87    | 1148.048 | 11.8756 |
| 11.8     | 1141.946 | 11.92    | 1148.177 | 11.92    | 1148.117 | 11.87297 | 1148.048 | 11.88   |
| 11.80303 | 1142.578 | 11.92217 | 1148.177 | 11.9233  | 1148.117 | 11.88    | 1148.048 | 11.8856 |
| 11.80531 | 1142.982 | 11.92911 | 1148.176 | 11.92919 | 1148.117 | 11.88297 | 1148.048 | 11.89   |
| 11.80759 | 1143.332 | 11.93099 | 1148.176 | 11.93084 | 1148.117 | 11.89    | 1148.049 | 11.8956 |
| 11.81    | 1143.666 | 11.93793 | 1148.176 | 11.93672 | 1148.118 | 11.89297 | 1148.049 | 11.9    |
| 11.81261 | 1143.989 | 11.94    | 1148.176 | 11.94    | 1148.118 | 11.9     | 1148.049 | 11.9056 |
| 11.81377 | 1144.116 | 11.94793 | 1148.176 | 11.94672 | 1148.118 | 11.90297 | 1148.049 | 11.91   |
| 11.81588 | 1144.336 | 11.95    | 1148.176 | 11.95    | 1148.118 | 11.91    | 1148.05  | 11.9156 |
| 11.81703 | 1144.457 | 11.95793 | 1148.176 | 11.95672 | 1148.119 | 11.91297 | 1148.05  | 11.92   |
| 11.81844 | 1144.608 | 11.96    | 1148.176 | 11.96    | 1148.119 | 11.92    | 1148.051 | 11.9256 |
| 11.81984 | 1144.766 | 11.96793 | 1148.176 | 11.96672 | 1148.12  | 11.92297 | 1148.051 | 11.93   |
| 11.82161 | 1144.976 | 11.97    | 1148.176 | 11.97    | 1148.12  | 11.92914 | 1148.052 | 11.9356 |
| 11.82262 | 1145.107 | 11.97793 | 1148.176 | 11.97672 | 1148.121 | 11.93088 | 1148.052 | 11.94   |
| 11.82444 | 1145.352 | 11.98    | 1148.177 | 11.98    | 1148.121 | 11.93705 | 1148.052 | 11.9456 |
| 11.82694 | 1145.7   | 11.98793 | 1148.177 | 11.98672 | 1148.122 | 11.94    | 1148.053 | 11.95   |
| 11.82853 | 1145.921 | 11.99    | 1148.177 | 11.99    | 1148.122 | 11.94705 | 1148.054 | 11.9556 |
| 11.83    | 1146.122 | 11.99793 | 1148.177 | 11.99672 | 1148.123 | 11.95    | 1148.054 | 11.96   |
| 11.83166 | 1146.331 | 12       | 1148.177 | 12       | 1148.123 | 11.95705 | 1148.055 | 11.9656 |
| 11.8329  | 1146.476 | 12.00793 | 1148.178 | 12.00672 | 1148.124 | 11.96    | 1148.056 | 11.97   |
| 11.83468 | 1146.657 | 12.01    | 1148.178 | 12.01    | 1148.125 | 11.96705 | 1148.057 | 11.9756 |
| 11.83627 | 1146.798 | 12.01793 | 1148.179 | 12.01672 | 1148.125 | 11.97    | 1148.057 | 11.98   |
| 11.83786 | 1146.919 | 12.02    | 1148.179 | 12.02    | 1148.126 | 11.97705 | 1148.058 | 11.9856 |
| 11.83944 | 1147.023 | 12.02793 | 1148.18  | 12.02672 | 1148.127 | 11.98    | 1148.059 | 11.99   |
| 11.84181 | 1147.162 | 12.03    | 1148.18  | 12.03    | 1148.127 | 11.98705 | 1148.06  | 11.9956 |
| 11.8434  | 1147.232 | 12.03793 | 1148.18  | 12.03672 | 1148.129 | 11.99    | 1148.061 | 12      |
| 11.84479 | 1147.288 | 12.04    | 1148.181 | 12.04    | 1148.129 | 11.99705 | 1148.062 | 12.0056 |
| 11.84706 | 1147.373 | 12.04793 | 1148.181 | 12.04672 | 1148.13  | 12       | 1148.062 | 12.01   |
| 11.85    | 1147.481 | 12.05    | 1148.182 | 12.05    | 1148.131 | 12.00705 | 1148.064 | 12.0156 |
| 11.8526  | 1147.576 | 12.05793 | 1148.183 | 12.05672 | 1148.132 | 12.01    | 1148.064 | 12.02   |
| 11.85392 | 1147.625 | 12.06    | 1148.183 | 12.06    | 1148.133 | 12.01705 | 1148.066 | 12.0256 |
| 11.85524 | 1147.673 | 12.06793 | 1148.184 | 12.06672 | 1148.134 | 12.02    | 1148.067 | 12.03   |

|          |          |          |          |          |          |          |          |         |
|----------|----------|----------|----------|----------|----------|----------|----------|---------|
| 11.85656 | 1147.722 | 12.07    | 1148.184 | 12.07    | 1148.134 | 12.02705 | 1148.068 | 12.0356 |
| 11.86    | 1147.842 | 12.07793 | 1148.185 | 12.07672 | 1148.136 | 12.03    | 1148.069 | 12.04   |
| 11.86151 | 1147.892 | 12.08    | 1148.185 | 12.08    | 1148.136 | 12.03705 | 1148.07  | 12.0456 |
| 11.86386 | 1147.956 | 12.08793 | 1148.186 | 12.08672 | 1148.138 | 12.04    | 1148.071 | 12.05   |
| 11.86559 | 1147.996 | 12.09    | 1148.187 | 12.09    | 1148.138 | 12.04705 | 1148.073 | 12.0556 |
| 11.86914 | 1148.053 | 12.09793 | 1148.188 | 12.09672 | 1148.14  | 12.05    | 1148.073 | 12.06   |
| 11.87051 | 1148.072 | 12.1     | 1148.188 | 12.1     | 1148.14  | 12.05705 | 1148.075 | 12.0656 |
| 11.87406 | 1148.112 | 12.10793 | 1148.189 | 12.10672 | 1148.142 | 12.06    | 1148.076 | 12.07   |
| 11.88    | 1148.144 | 12.11    | 1148.19  | 12.11    | 1148.142 | 12.06705 | 1148.078 | 12.0756 |
| 11.88406 | 1148.164 | 12.11793 | 1148.191 | 12.11672 | 1148.144 | 12.07    | 1148.078 | 12.08   |
| 11.88824 | 1148.183 | 12.12    | 1148.191 | 12.12    | 1148.145 | 12.07705 | 1148.08  | 12.0856 |
| 11.89    | 1148.192 | 12.12793 | 1148.192 | 12.12672 | 1148.146 | 12.08    | 1148.081 | 12.09   |
| 11.89436 | 1148.211 | 12.13    | 1148.193 | 12.13    | 1148.147 | 12.08705 | 1148.083 | 12.0956 |
| 11.89724 | 1148.221 | 12.13793 | 1148.194 | 12.13672 | 1148.148 | 12.09    | 1148.084 | 12.1    |
| 11.9     | 1148.227 | 12.14    | 1148.194 | 12.14    | 1148.149 | 12.09705 | 1148.085 | 12.1056 |
| 11.90328 | 1148.234 | 12.14793 | 1148.196 | 12.14672 | 1148.151 | 12.1     | 1148.086 | 12.11   |
| 11.91    | 1148.235 | 12.15    | 1148.196 | 12.15    | 1148.151 | 12.10705 | 1148.088 | 12.1156 |
| 11.91328 | 1148.235 | 12.15793 | 1148.197 | 12.15672 | 1148.153 | 12.11    | 1148.089 | 12.12   |
| 11.91935 | 1148.233 | 12.16    | 1148.198 | 12.16    | 1148.154 | 12.11705 | 1148.091 | 12.1256 |
| 11.92087 | 1148.233 | 12.16793 | 1148.199 | 12.16672 | 1148.155 | 12.12    | 1148.092 | 12.13   |
| 11.92693 | 1148.233 | 12.17    | 1148.2   | 12.17    | 1148.156 | 12.12705 | 1148.094 | 12.1356 |
| 11.92977 | 1148.233 | 12.17793 | 1148.201 | 12.17672 | 1148.158 | 12.13    | 1148.095 | 12.14   |
| 11.93324 | 1148.233 | 12.18    | 1148.201 | 12.18    | 1148.158 | 12.13705 | 1148.097 | 12.1456 |
| 11.93913 | 1148.233 | 12.18793 | 1148.203 | 12.18672 | 1148.16  | 12.14    | 1148.098 | 12.15   |
| 11.94084 | 1148.232 | 12.19    | 1148.203 | 12.19    | 1148.161 | 12.14705 | 1148.1   | 12.1556 |
| 11.94673 | 1148.231 | 12.19793 | 1148.205 | 12.19672 | 1148.163 | 12.15    | 1148.1   | 12.16   |
| 11.95    | 1148.23  | 12.2     | 1148.205 | 12.2     | 1148.163 | 12.15705 | 1148.103 | 12.1656 |
| 11.95673 | 1148.228 | 12.20793 | 1148.207 | 12.20672 | 1148.165 | 12.16    | 1148.103 | 12.17   |
| 11.96    | 1148.228 | 12.21    | 1148.207 | 12.21    | 1148.166 | 12.16705 | 1148.106 | 12.1756 |
| 11.96673 | 1148.227 | 12.21793 | 1148.209 | 12.21672 | 1148.167 | 12.17    | 1148.106 | 12.18   |
| 11.97    | 1148.227 | 12.22    | 1148.209 | 12.22    | 1148.168 | 12.17705 | 1148.109 | 12.1856 |
| 11.97673 | 1148.227 | 12.22793 | 1148.211 | 12.22672 | 1148.17  | 12.18    | 1148.109 | 12.19   |
| 11.98    | 1148.226 | 12.23    | 1148.211 | 12.23    | 1148.171 | 12.18705 | 1148.112 | 12.1956 |
| 11.98673 | 1148.226 | 12.23793 | 1148.213 | 12.23672 | 1148.173 | 12.19    | 1148.113 | 12.2    |
| 11.99    | 1148.225 | 12.24    | 1148.213 | 12.24    | 1148.173 | 12.19705 | 1148.115 | 12.2056 |
| 11.99673 | 1148.225 | 12.24793 | 1148.215 | 12.24672 | 1148.175 | 12.2     | 1148.116 | 12.21   |
| 12       | 1148.225 | 12.25    | 1148.215 | 12.25    | 1148.176 | 12.20705 | 1148.118 | 12.2156 |
| 12.00673 | 1148.225 | 12.25793 | 1148.217 | 12.25672 | 1148.178 | 12.21    | 1148.119 | 12.22   |
| 12.01    | 1148.225 | 12.26    | 1148.217 | 12.26    | 1148.178 | 12.21705 | 1148.121 | 12.2256 |
| 12.01673 | 1148.225 | 12.26793 | 1148.219 | 12.26672 | 1148.18  | 12.22    | 1148.122 | 12.23   |
| 12.02    | 1148.225 | 12.27    | 1148.219 | 12.27    | 1148.181 | 12.22705 | 1148.124 | 12.2356 |
| 12.02673 | 1148.225 | 12.27793 | 1148.221 | 12.27672 | 1148.183 | 12.23    | 1148.125 | 12.24   |
| 12.03    | 1148.225 | 12.28    | 1148.221 | 12.28    | 1148.184 | 12.23705 | 1148.127 | 12.2456 |
| 12.03673 | 1148.226 | 12.28793 | 1148.223 | 12.28672 | 1148.185 | 12.24    | 1148.128 | 12.25   |
| 12.04    | 1148.226 | 12.29    | 1148.223 | 12.29    | 1148.186 | 12.24705 | 1148.13  | 12.2556 |
| 12.04673 | 1148.226 | 12.29793 | 1148.225 | 12.29672 | 1148.188 | 12.25    | 1148.131 | 12.26   |
| 12.05    | 1148.226 | 12.3     | 1148.225 | 12.3     | 1148.189 | 12.25705 | 1148.133 | 12.2656 |

|          |          |          |          |          |          |          |          |         |
|----------|----------|----------|----------|----------|----------|----------|----------|---------|
| 12.05673 | 1148.227 | 12.30793 | 1148.227 | 12.30672 | 1148.191 | 12.26    | 1148.134 | 12.27   |
| 12.06    | 1148.227 | 12.31    | 1148.227 | 12.31    | 1148.191 | 12.26705 | 1148.137 | 12.2756 |
| 12.06673 | 1148.227 | 12.31793 | 1148.229 | 12.31672 | 1148.193 | 12.27    | 1148.138 | 12.28   |
| 12.07    | 1148.228 | 12.32    | 1148.229 | 12.32    | 1148.194 | 12.27705 | 1148.14  | 12.2856 |
| 12.07673 | 1148.228 | 12.32793 | 1148.231 | 12.32672 | 1148.196 | 12.28    | 1148.141 | 12.29   |
| 12.08    | 1148.228 | 12.33    | 1148.231 | 12.33    | 1148.197 | 12.28705 | 1148.143 | 12.2956 |
| 12.08673 | 1148.229 | 12.33793 | 1148.233 | 12.33672 | 1148.198 | 12.29    | 1148.144 | 12.3    |
| 12.09    | 1148.229 | 12.34    | 1148.233 | 12.34    | 1148.199 | 12.29705 | 1148.146 | 12.3056 |
| 12.09673 | 1148.23  | 12.34793 | 1148.235 | 12.34672 | 1148.201 | 12.3     | 1148.147 | 12.31   |
| 12.1     | 1148.23  | 12.35    | 1148.235 | 12.35    | 1148.202 | 12.30705 | 1148.149 | 12.3156 |
| 12.10673 | 1148.231 | 12.35793 | 1148.237 | 12.35672 | 1148.203 | 12.31    | 1148.15  | 12.32   |
| 12.11    | 1148.231 | 12.36    | 1148.238 | 12.36    | 1148.204 | 12.31705 | 1148.152 | 12.3256 |
| 12.11673 | 1148.232 | 12.36793 | 1148.239 | 12.36672 | 1148.206 | 12.32    | 1148.153 | 12.33   |
| 12.12    | 1148.232 | 12.37    | 1148.24  | 12.37    | 1148.207 | 12.32705 | 1148.156 | 12.3356 |
| 12.12673 | 1148.233 | 12.37793 | 1148.241 | 12.37672 | 1148.209 | 12.33    | 1148.156 | 12.34   |
| 12.13    | 1148.233 | 12.38    | 1148.242 | 12.38    | 1148.209 | 12.33705 | 1148.159 | 12.3456 |
| 12.13673 | 1148.234 | 12.38793 | 1148.243 | 12.38672 | 1148.211 | 12.34    | 1148.16  | 12.35   |
| 12.14    | 1148.234 | 12.39    | 1148.244 | 12.39    | 1148.212 | 12.34705 | 1148.162 | 12.3556 |
| 12.14673 | 1148.235 | 12.39793 | 1148.245 | 12.39672 | 1148.214 | 12.35    | 1148.163 | 12.36   |
| 12.15    | 1148.235 | 12.4     | 1148.246 | 12.4     | 1148.214 | 12.35705 | 1148.165 | 12.3656 |
| 12.15673 | 1148.236 | 12.40793 | 1148.247 | 12.40672 | 1148.216 | 12.36    | 1148.166 | 12.37   |
| 12.16    | 1148.236 | 12.41    | 1148.248 | 12.41    | 1148.217 | 12.36705 | 1148.168 | 12.3756 |
| 12.16673 | 1148.237 | 12.41793 | 1148.249 | 12.41672 | 1148.219 | 12.37    | 1148.169 | 12.38   |
| 12.17    | 1148.238 | 12.42    | 1148.25  | 12.42    | 1148.219 | 12.37705 | 1148.171 | 12.3856 |
| 12.17397 | 1148.238 | 12.42793 | 1148.251 | 12.42672 | 1148.221 | 12.38    | 1148.172 | 12.39   |
| 12.18    | 1148.239 | 12.43    | 1148.252 | 12.43    | 1148.222 | 12.38705 | 1148.174 | 12.3956 |
| 12.18382 | 1148.239 | 12.43793 | 1148.254 | 12.43672 | 1148.224 | 12.39    | 1148.175 | 12.4    |
| 12.19    | 1148.24  | 12.44    | 1148.254 | 12.44    | 1148.224 | 12.39705 | 1148.177 | 12.4056 |
| 12.19382 | 1148.241 | 12.44793 | 1148.256 | 12.44672 | 1148.226 | 12.4     | 1148.178 | 12.41   |
| 12.2     | 1148.242 | 12.45    | 1148.256 | 12.45    | 1148.227 | 12.40705 | 1148.18  | 12.4156 |
| 12.20382 | 1148.242 | 12.45793 | 1148.258 | 12.45672 | 1148.228 | 12.41    | 1148.181 | 12.42   |
| 12.21    | 1148.243 | 12.46    | 1148.258 | 12.46    | 1148.229 | 12.41705 | 1148.183 | 12.4256 |
| 12.21382 | 1148.244 | 12.46793 | 1148.26  | 12.46672 | 1148.231 | 12.42    | 1148.184 | 12.43   |
| 12.22    | 1148.244 | 12.47    | 1148.26  | 12.47    | 1148.232 | 12.42705 | 1148.186 | 12.4356 |
| 12.22382 | 1148.245 | 12.47793 | 1148.261 | 12.47672 | 1148.233 | 12.43    | 1148.187 | 12.44   |
| 12.23    | 1148.246 | 12.48    | 1148.262 | 12.48    | 1148.234 | 12.43705 | 1148.189 | 12.4456 |
| 12.23382 | 1148.246 | 12.48793 | 1148.263 | 12.48672 | 1148.236 | 12.44    | 1148.19  | 12.45   |
| 12.24    | 1148.247 | 12.49    | 1148.264 | 12.49    | 1148.236 | 12.44705 | 1148.192 | 12.4556 |
| 12.24382 | 1148.248 | 12.49793 | 1148.265 | 12.49672 | 1148.238 | 12.45    | 1148.193 | 12.46   |
| 12.25    | 1148.249 | 12.5     | 1148.266 | 12.5     | 1148.239 | 12.45705 | 1148.195 | 12.4656 |
| 12.25382 | 1148.249 | 12.50793 | 1148.267 | 12.50672 | 1148.24  | 12.46    | 1148.196 | 12.47   |
| 12.26    | 1148.25  | 12.51    | 1148.268 | 12.51    | 1148.241 | 12.46705 | 1148.198 | 12.4756 |
| 12.26382 | 1148.251 | 12.51793 | 1148.269 | 12.51672 | 1148.243 | 12.47    | 1148.199 | 12.48   |
| 12.27    | 1148.252 | 12.52    | 1148.27  | 12.52    | 1148.244 | 12.47705 | 1148.201 | 12.4856 |
| 12.27382 | 1148.253 | 12.52793 | 1148.271 | 12.52672 | 1148.245 | 12.48    | 1148.202 | 12.49   |
| 12.28    | 1148.253 | 12.53    | 1148.272 | 12.53    | 1148.246 | 12.48705 | 1148.204 | 12.4956 |
| 12.28382 | 1148.254 | 12.53793 | 1148.273 | 12.53672 | 1148.247 | 12.49    | 1148.205 | 12.5    |

|          |          |          |          |          |          |          |          |         |
|----------|----------|----------|----------|----------|----------|----------|----------|---------|
| 12.29    | 1148.255 | 12.54    | 1148.273 | 12.54    | 1148.248 | 12.49705 | 1148.207 | 12.5056 |
| 12.29382 | 1148.256 | 12.54793 | 1148.275 | 12.54672 | 1148.25  | 12.5     | 1148.208 | 12.51   |
| 12.3     | 1148.257 | 12.55    | 1148.275 | 12.55    | 1148.25  | 12.50705 | 1148.21  | 12.5156 |
| 12.30382 | 1148.257 | 12.55793 | 1148.277 | 12.55672 | 1148.252 | 12.51    | 1148.21  | 12.52   |
| 12.31    | 1148.258 | 12.56    | 1148.277 | 12.56    | 1148.253 | 12.51705 | 1148.212 | 12.5256 |
| 12.31382 | 1148.259 | 12.56793 | 1148.279 | 12.56672 | 1148.254 | 12.52    | 1148.213 | 12.53   |
| 12.32    | 1148.26  | 12.57    | 1148.279 | 12.57    | 1148.255 | 12.52705 | 1148.215 | 12.5356 |
| 12.32382 | 1148.26  | 12.57793 | 1148.28  | 12.57672 | 1148.256 | 12.53    | 1148.216 | 12.54   |
| 12.33    | 1148.261 | 12.58    | 1148.281 | 12.58    | 1148.257 | 12.53705 | 1148.218 | 12.5456 |
| 12.33382 | 1148.262 | 12.58793 | 1148.282 | 12.58672 | 1148.258 | 12.54    | 1148.219 | 12.55   |
| 12.34    | 1148.263 | 12.59    | 1148.283 | 12.59    | 1148.259 | 12.54705 | 1148.221 | 12.5556 |
| 12.34382 | 1148.264 | 12.59793 | 1148.284 | 12.59672 | 1148.261 | 12.55    | 1148.221 | 12.56   |
| 12.35    | 1148.265 | 12.6     | 1148.284 | 12.6     | 1148.261 | 12.55705 | 1148.223 | 12.5656 |
| 12.35382 | 1148.265 | 12.60793 | 1148.286 | 12.60672 | 1148.263 | 12.56    | 1148.224 | 12.57   |
| 12.36    | 1148.266 | 12.61    | 1148.286 | 12.61    | 1148.263 | 12.56705 | 1148.226 | 12.5756 |
| 12.36382 | 1148.267 | 12.61793 | 1148.288 | 12.61672 | 1148.265 | 12.57    | 1148.227 | 12.58   |
| 12.37    | 1148.268 | 12.62    | 1148.288 | 12.62    | 1148.266 | 12.57705 | 1148.229 | 12.5856 |
| 12.37382 | 1148.269 | 12.62793 | 1148.289 | 12.62672 | 1148.267 | 12.58    | 1148.229 | 12.59   |
| 12.38    | 1148.27  | 12.63    | 1148.29  | 12.63    | 1148.268 | 12.58705 | 1148.231 | 12.5956 |
| 12.38382 | 1148.27  | 12.63793 | 1148.291 | 12.63672 | 1148.269 | 12.59    | 1148.232 | 12.6    |
| 12.39    | 1148.271 | 12.64    | 1148.291 | 12.64    | 1148.27  | 12.59705 | 1148.234 | 12.6056 |
| 12.39382 | 1148.272 | 12.64793 | 1148.293 | 12.64672 | 1148.271 | 12.6     | 1148.234 | 12.61   |
| 12.4     | 1148.273 | 12.65    | 1148.293 | 12.65    | 1148.272 | 12.60705 | 1148.236 | 12.6156 |
| 12.40382 | 1148.273 | 12.65793 | 1148.294 | 12.65672 | 1148.273 | 12.61    | 1148.237 | 12.62   |
| 12.41    | 1148.275 | 12.66    | 1148.295 | 12.66    | 1148.274 | 12.61705 | 1148.239 | 12.6256 |
| 12.41382 | 1148.275 | 12.66793 | 1148.296 | 12.66672 | 1148.275 | 12.62    | 1148.239 | 12.63   |
| 12.42    | 1148.276 | 12.67    | 1148.297 | 12.67    | 1148.276 | 12.62705 | 1148.241 | 12.6356 |
| 12.42382 | 1148.277 | 12.67793 | 1148.298 | 12.67672 | 1148.277 | 12.63    | 1148.242 | 12.64   |
| 12.43    | 1148.278 | 12.68    | 1148.298 | 12.68    | 1148.278 | 12.63705 | 1148.244 | 12.6456 |
| 12.43382 | 1148.278 | 12.68793 | 1148.299 | 12.68672 | 1148.279 | 12.64    | 1148.244 | 12.65   |
| 12.44    | 1148.279 | 12.69    | 1148.3   | 12.69    | 1148.28  | 12.64705 | 1148.246 | 12.6556 |
| 12.44382 | 1148.28  | 12.69793 | 1148.301 | 12.69672 | 1148.281 | 12.65    | 1148.247 | 12.66   |
| 12.45    | 1148.281 | 12.7     | 1148.301 | 12.7     | 1148.282 | 12.65705 | 1148.249 | 12.6656 |
| 12.45382 | 1148.282 | 12.70793 | 1148.303 | 12.70672 | 1148.283 | 12.66    | 1148.249 | 12.67   |
| 12.46    | 1148.283 | 12.71    | 1148.303 | 12.71    | 1148.283 | 12.66705 | 1148.251 | 12.6756 |
| 12.46382 | 1148.283 | 12.71793 | 1148.304 | 12.71672 | 1148.285 | 12.67    | 1148.252 | 12.68   |
| 12.47    | 1148.284 | 12.72    | 1148.305 | 12.72    | 1148.285 | 12.67705 | 1148.253 | 12.6856 |
| 12.47382 | 1148.285 | 12.72793 | 1148.306 | 12.72672 | 1148.287 | 12.68    | 1148.254 | 12.69   |
| 12.48    | 1148.286 | 12.73    | 1148.306 | 12.73    | 1148.287 | 12.68705 | 1148.256 | 12.6956 |
| 12.48382 | 1148.286 | 12.73793 | 1148.307 | 12.73672 | 1148.288 | 12.69    | 1148.256 | 12.7    |
| 12.49    | 1148.287 | 12.74    | 1148.308 | 12.74    | 1148.289 | 12.69705 | 1148.258 | 12.7056 |
| 12.49382 | 1148.288 | 12.74793 | 1148.309 | 12.74672 | 1148.29  | 12.7     | 1148.259 | 12.71   |
| 12.5     | 1148.289 | 12.75    | 1148.309 | 12.75    | 1148.291 | 12.70705 | 1148.26  | 12.7156 |
| 12.50382 | 1148.29  | 12.75793 | 1148.31  | 12.75672 | 1148.292 | 12.71    | 1148.261 | 12.72   |
| 12.51    | 1148.291 | 12.76    | 1148.311 | 12.76    | 1148.293 | 12.71705 | 1148.262 | 12.7256 |
| 12.51382 | 1148.291 | 12.76793 | 1148.312 | 12.76672 | 1148.294 | 12.72    | 1148.263 | 12.73   |
| 12.52    | 1148.292 | 12.77    | 1148.312 | 12.77    | 1148.294 | 12.72705 | 1148.265 | 12.7356 |

|          |          |          |          |          |          |          |          |         |
|----------|----------|----------|----------|----------|----------|----------|----------|---------|
| 12.52382 | 1148.293 | 12.77793 | 1148.313 | 12.77672 | 1148.296 | 12.73    | 1148.265 | 12.74   |
| 12.53    | 1148.294 | 12.78    | 1148.314 | 12.78    | 1148.296 | 12.73705 | 1148.267 | 12.7456 |
| 12.53382 | 1148.294 | 12.78793 | 1148.315 | 12.78672 | 1148.297 | 12.74    | 1148.267 | 12.75   |
| 12.54    | 1148.295 | 12.79    | 1148.315 | 12.79    | 1148.298 | 12.74705 | 1148.269 | 12.7556 |
| 12.54382 | 1148.296 | 12.79793 | 1148.316 | 12.79672 | 1148.299 | 12.75    | 1148.269 | 12.76   |
| 12.55    | 1148.297 | 12.8     | 1148.316 | 12.8     | 1148.299 | 12.75705 | 1148.271 | 12.7656 |
| 12.55382 | 1148.297 | 12.80793 | 1148.318 | 12.80672 | 1148.301 | 12.76    | 1148.272 | 12.77   |
| 12.56    | 1148.298 | 12.81    | 1148.318 | 12.81    | 1148.301 | 12.76705 | 1148.273 | 12.7756 |
| 12.56382 | 1148.299 | 12.81793 | 1148.319 | 12.81672 | 1148.302 | 12.77    | 1148.274 | 12.78   |
| 12.57    | 1148.3   | 12.82    | 1148.319 | 12.82    | 1148.303 | 12.77705 | 1148.275 | 12.7856 |
| 12.57382 | 1148.3   | 12.82793 | 1148.32  | 12.82672 | 1148.304 | 12.78    | 1148.276 | 12.79   |
| 12.58    | 1148.301 | 12.83    | 1148.321 | 12.83    | 1148.304 | 12.78705 | 1148.277 | 12.7956 |
| 12.58382 | 1148.302 | 12.83793 | 1148.322 | 12.83672 | 1148.306 | 12.79    | 1148.278 | 12.8    |
| 12.59    | 1148.303 | 12.84    | 1148.322 | 12.84    | 1148.306 | 12.79705 | 1148.279 | 12.8056 |
| 12.59382 | 1148.303 | 12.84793 | 1148.323 | 12.84672 | 1148.307 | 12.8     | 1148.28  | 12.81   |
| 12.6     | 1148.304 | 12.85    | 1148.323 | 12.85    | 1148.308 | 12.80705 | 1148.281 | 12.8156 |
| 12.60382 | 1148.305 | 12.85793 | 1148.324 | 12.85672 | 1148.309 | 12.81    | 1148.282 | 12.82   |
| 12.61    | 1148.306 | 12.86    | 1148.325 | 12.86    | 1148.309 | 12.81705 | 1148.283 | 12.8256 |
| 12.61382 | 1148.306 | 12.86793 | 1148.326 | 12.86672 | 1148.31  | 12.82    | 1148.284 | 12.83   |
| 12.62    | 1148.307 | 12.87    | 1148.326 | 12.87    | 1148.311 | 12.82705 | 1148.285 | 12.8356 |
| 12.62382 | 1148.308 | 12.87793 | 1148.327 | 12.87672 | 1148.312 | 12.83    | 1148.286 | 12.84   |
| 12.63    | 1148.309 | 12.88    | 1148.327 | 12.88    | 1148.312 | 12.83705 | 1148.287 | 12.8456 |
| 12.63382 | 1148.309 | 12.88793 | 1148.328 | 12.88672 | 1148.313 | 12.84    | 1148.288 | 12.85   |
| 12.64    | 1148.31  | 12.89    | 1148.328 | 12.89    | 1148.314 | 12.84705 | 1148.289 | 12.8556 |
| 12.64382 | 1148.311 | 12.89793 | 1148.329 | 12.89672 | 1148.315 | 12.85    | 1148.289 | 12.86   |
| 12.65    | 1148.311 | 12.9     | 1148.33  | 12.9     | 1148.315 | 12.85705 | 1148.291 | 12.8656 |
| 12.65382 | 1148.312 | 12.90793 | 1148.331 | 12.90672 | 1148.316 | 12.86    | 1148.291 | 12.87   |
| 12.66    | 1148.313 | 12.91    | 1148.331 | 12.91    | 1148.317 | 12.86705 | 1148.293 | 12.8756 |
| 12.66382 | 1148.313 | 12.91793 | 1148.332 | 12.91672 | 1148.318 | 12.87    | 1148.293 | 12.88   |
| 12.67    | 1148.314 | 12.92    | 1148.332 | 12.92    | 1148.318 | 12.87705 | 1148.294 | 12.8856 |
| 12.67382 | 1148.315 | 12.92793 | 1148.333 | 12.92672 | 1148.319 | 12.88    | 1148.295 | 12.89   |
| 12.68    | 1148.316 | 12.93    | 1148.333 | 12.93    | 1148.32  | 12.88705 | 1148.296 | 12.8956 |
| 12.68382 | 1148.316 | 12.93793 | 1148.334 | 12.93672 | 1148.32  | 12.89    | 1148.297 | 12.9    |
| 12.69    | 1148.317 | 12.94    | 1148.334 | 12.94    | 1148.321 | 12.89705 | 1148.298 | 12.9056 |
| 12.69382 | 1148.317 | 12.94793 | 1148.335 | 12.94672 | 1148.322 | 12.9     | 1148.298 | 12.91   |
| 12.7     | 1148.318 | 12.95    | 1148.336 | 12.95    | 1148.322 | 12.90705 | 1148.3   | 12.9156 |
| 12.70382 | 1148.319 | 12.95793 | 1148.337 | 12.95672 | 1148.323 | 12.91    | 1148.3   | 12.92   |
| 12.71    | 1148.32  | 12.96    | 1148.337 | 12.96    | 1148.324 | 12.91705 | 1148.301 | 12.9256 |
| 12.71382 | 1148.32  | 12.96793 | 1148.338 | 12.96672 | 1148.325 | 12.92    | 1148.302 | 12.93   |
| 12.72    | 1148.321 | 12.97    | 1148.338 | 12.97    | 1148.325 | 12.92705 | 1148.303 | 12.9356 |
| 12.72382 | 1148.321 | 12.97793 | 1148.339 | 12.97672 | 1148.326 | 12.93    | 1148.303 | 12.94   |
| 12.73    | 1148.322 | 12.98    | 1148.339 | 12.98    | 1148.326 | 12.93705 | 1148.305 | 12.9456 |
| 12.73382 | 1148.323 | 12.98793 | 1148.34  | 12.98672 | 1148.327 | 12.94    | 1148.305 | 12.95   |
| 12.74    | 1148.323 | 12.99    | 1148.34  | 12.99    | 1148.328 | 12.94705 | 1148.306 | 12.9556 |
| 12.74382 | 1148.324 | 12.99793 | 1148.341 | 12.99672 | 1148.328 | 12.95    | 1148.307 | 12.96   |
| 12.75    | 1148.325 | 13       | 1148.341 | 13       | 1148.329 | 12.95705 | 1148.308 | 12.9656 |
| 12.75382 | 1148.325 | 13.00793 | 1148.342 | 13.00672 | 1148.33  | 12.96    | 1148.308 | 12.97   |

|          |          |          |          |          |          |          |          |         |
|----------|----------|----------|----------|----------|----------|----------|----------|---------|
| 12.76    | 1148.326 | 13.01    | 1148.342 | 13.01    | 1148.33  | 12.96705 | 1148.309 | 12.9756 |
| 12.76382 | 1148.326 | 13.01793 | 1148.343 | 13.01672 | 1148.331 | 12.97    | 1148.31  | 12.98   |
| 12.77    | 1148.327 | 13.02    | 1148.343 | 13.02    | 1148.331 | 12.97705 | 1148.311 | 12.9856 |
| 12.77382 | 1148.328 | 13.02793 | 1148.344 | 13.02672 | 1148.332 | 12.98    | 1148.311 | 12.99   |
| 12.78    | 1148.328 | 13.03    | 1148.344 | 13.03    | 1148.333 | 12.98705 | 1148.313 | 12.9956 |
| 12.78382 | 1148.329 | 13.03793 | 1148.345 | 13.03672 | 1148.333 | 12.99    | 1148.313 | 13      |
| 12.79    | 1148.33  | 13.04    | 1148.345 | 13.04    | 1148.334 | 12.99705 | 1148.314 | 13.0056 |
| 12.79382 | 1148.33  | 13.04793 | 1148.346 | 13.04672 | 1148.335 | 13       | 1148.315 | 13.01   |
| 12.8     | 1148.331 | 13.05    | 1148.346 | 13.05    | 1148.335 | 13.00705 | 1148.316 | 13.0156 |
| 12.80382 | 1148.331 | 13.05793 | 1148.347 | 13.05672 | 1148.336 | 13.01    | 1148.316 | 13.02   |
| 12.81    | 1148.332 | 13.06    | 1148.347 | 13.06    | 1148.336 | 13.01705 | 1148.317 | 13.0256 |
| 12.81382 | 1148.332 | 13.06793 | 1148.348 | 13.06672 | 1148.337 | 13.02    | 1148.317 | 13.03   |
| 12.82    | 1148.333 | 13.07    | 1148.348 | 13.07    | 1148.337 | 13.02705 | 1148.318 | 13.0356 |
| 12.82382 | 1148.334 | 13.07793 | 1148.349 | 13.07672 | 1148.338 | 13.03    | 1148.319 | 13.04   |
| 12.83    | 1148.334 | 13.08    | 1148.349 | 13.08    | 1148.338 | 13.03705 | 1148.32  | 13.0456 |
| 12.83382 | 1148.335 | 13.08793 | 1148.35  | 13.08672 | 1148.339 | 13.04    | 1148.32  | 13.05   |
| 12.84    | 1148.335 | 13.09    | 1148.35  | 13.09    | 1148.34  | 13.04705 | 1148.321 | 13.0556 |
| 12.84382 | 1148.336 | 13.09793 | 1148.351 | 13.09672 | 1148.34  | 13.05    | 1148.322 | 13.06   |
| 12.85    | 1148.336 | 13.1     | 1148.351 | 13.1     | 1148.341 | 13.05705 | 1148.323 | 13.0656 |
| 12.85382 | 1148.337 | 13.10793 | 1148.352 | 13.10672 | 1148.341 | 13.06    | 1148.323 | 13.07   |
| 12.86    | 1148.338 | 13.11    | 1148.352 | 13.11    | 1148.342 | 13.06705 | 1148.324 | 13.0756 |
| 12.86382 | 1148.338 | 13.11793 | 1148.353 | 13.11672 | 1148.342 | 13.07    | 1148.324 | 13.08   |
| 12.87    | 1148.339 | 13.12    | 1148.353 | 13.12    | 1148.343 | 13.07705 | 1148.325 | 13.0856 |
| 12.87382 | 1148.339 | 13.12793 | 1148.354 | 13.12672 | 1148.343 | 13.08    | 1148.326 | 13.09   |
| 12.88    | 1148.34  | 13.13    | 1148.354 | 13.13    | 1148.344 | 13.08705 | 1148.327 | 13.0956 |
| 12.88382 | 1148.34  | 13.13793 | 1148.354 | 13.13672 | 1148.344 | 13.09    | 1148.327 | 13.1    |
| 12.89    | 1148.341 | 13.14    | 1148.355 | 13.14    | 1148.345 | 13.09705 | 1148.328 | 13.1056 |
| 12.89382 | 1148.341 | 13.14793 | 1148.355 | 13.14672 | 1148.345 | 13.1     | 1148.328 | 13.11   |
| 12.9     | 1148.342 | 13.15    | 1148.355 | 13.15    | 1148.346 | 13.10705 | 1148.329 | 13.1156 |
| 12.90382 | 1148.342 | 13.15793 | 1148.356 | 13.15672 | 1148.346 | 13.11    | 1148.33  | 13.12   |
| 12.91    | 1148.343 | 13.16    | 1148.356 | 13.16    | 1148.347 | 13.11705 | 1148.331 | 13.1256 |
| 12.91382 | 1148.343 | 13.16793 | 1148.357 | 13.16672 | 1148.347 | 13.12    | 1148.331 | 13.13   |
| 12.92    | 1148.344 | 13.17    | 1148.357 | 13.17    | 1148.348 | 13.12705 | 1148.332 | 13.1356 |
| 12.92382 | 1148.344 | 13.17793 | 1148.358 | 13.17672 | 1148.348 | 13.13    | 1148.332 | 13.14   |
| 12.93    | 1148.345 | 13.18    | 1148.358 | 13.18    | 1148.349 | 13.13705 | 1148.333 | 13.1456 |
| 12.93382 | 1148.345 | 13.18793 | 1148.358 | 13.18672 | 1148.349 | 13.14    | 1148.333 | 13.15   |
| 12.94    | 1148.346 | 13.19    | 1148.359 | 13.19    | 1148.35  | 13.14705 | 1148.334 | 13.1556 |
| 12.94382 | 1148.346 | 13.19793 | 1148.359 | 13.19672 | 1148.35  | 13.15    | 1148.335 | 13.16   |
| 12.95    | 1148.347 | 13.2     | 1148.359 | 13.2     | 1148.351 | 13.15705 | 1148.335 | 13.1656 |
| 12.95382 | 1148.347 | 13.20793 | 1148.36  | 13.20672 | 1148.351 | 13.16    | 1148.336 | 13.17   |
| 12.96    | 1148.348 | 13.21    | 1148.36  | 13.21    | 1148.352 | 13.16705 | 1148.337 | 13.1756 |
| 12.96382 | 1148.348 | 13.21793 | 1148.361 | 13.21672 | 1148.352 | 13.17    | 1148.337 | 13.18   |
| 12.97    | 1148.349 | 13.22    | 1148.361 | 13.22    | 1148.352 | 13.17705 | 1148.338 | 13.1856 |
| 12.97382 | 1148.349 | 13.22793 | 1148.362 | 13.22672 | 1148.353 | 13.18    | 1148.338 | 13.19   |
| 12.98    | 1148.35  | 13.23    | 1148.362 | 13.23    | 1148.353 | 13.18705 | 1148.339 | 13.1956 |
| 12.98382 | 1148.35  | 13.23793 | 1148.362 | 13.23672 | 1148.354 | 13.19    | 1148.339 | 13.2    |
| 12.99    | 1148.35  | 13.24    | 1148.362 | 13.24    | 1148.354 | 13.19705 | 1148.34  | 13.2056 |

|          |          |          |          |          |          |          |          |         |
|----------|----------|----------|----------|----------|----------|----------|----------|---------|
| 12.99382 | 1148.351 | 13.24793 | 1148.363 | 13.24672 | 1148.355 | 13.2     | 1148.34  | 13.21   |
| 13       | 1148.351 | 13.25    | 1148.363 | 13.25    | 1148.355 | 13.20705 | 1148.341 | 13.2156 |
| 13.00382 | 1148.352 | 13.25793 | 1148.364 | 13.25672 | 1148.356 | 13.21    | 1148.341 | 13.22   |
| 13.01    | 1148.352 | 13.26    | 1148.364 | 13.26    | 1148.356 | 13.21705 | 1148.342 | 13.2256 |
| 13.01382 | 1148.353 | 13.26793 | 1148.364 | 13.26672 | 1148.357 | 13.22    | 1148.342 | 13.23   |
| 13.02    | 1148.353 | 13.27    | 1148.365 | 13.27    | 1148.357 | 13.22705 | 1148.343 | 13.2356 |
| 13.02382 | 1148.353 | 13.27793 | 1148.365 | 13.27672 | 1148.357 | 13.23    | 1148.344 | 13.24   |
| 13.03    | 1148.354 | 13.28    | 1148.365 | 13.28    | 1148.358 | 13.23705 | 1148.344 | 13.2456 |
| 13.03382 | 1148.354 | 13.28793 | 1148.366 | 13.28672 | 1148.358 | 13.24    | 1148.345 | 13.25   |
| 13.04    | 1148.355 | 13.29    | 1148.366 | 13.29    | 1148.358 | 13.24705 | 1148.345 | 13.2556 |
| 13.04382 | 1148.355 | 13.29793 | 1148.366 | 13.29672 | 1148.359 | 13.25    | 1148.346 | 13.26   |
| 13.05    | 1148.356 | 13.3     | 1148.367 | 13.3     | 1148.359 | 13.25705 | 1148.346 | 13.2656 |
| 13.05382 | 1148.356 | 13.30793 | 1148.367 | 13.30672 | 1148.36  | 13.26    | 1148.347 | 13.27   |
| 13.06    | 1148.356 | 13.31    | 1148.367 | 13.31    | 1148.36  | 13.26705 | 1148.347 | 13.2756 |
| 13.06382 | 1148.357 | 13.31793 | 1148.368 | 13.31672 | 1148.36  | 13.27    | 1148.348 | 13.28   |
| 13.07    | 1148.357 | 13.32    | 1148.368 | 13.32    | 1148.361 | 13.27705 | 1148.348 | 13.2856 |
| 13.07382 | 1148.358 | 13.32793 | 1148.368 | 13.32672 | 1148.361 | 13.28    | 1148.349 | 13.29   |
| 13.08    | 1148.358 | 13.33    | 1148.369 | 13.33    | 1148.361 | 13.28705 | 1148.349 | 13.2956 |
| 13.08382 | 1148.358 | 13.33793 | 1148.369 | 13.33672 | 1148.362 | 13.29    | 1148.35  | 13.3    |
| 13.09    | 1148.359 | 13.34    | 1148.369 | 13.34    | 1148.362 | 13.29705 | 1148.35  | 13.3056 |
| 13.09382 | 1148.359 | 13.34793 | 1148.37  | 13.34672 | 1148.363 | 13.3     | 1148.35  | 13.31   |
| 13.1     | 1148.36  | 13.35    | 1148.37  | 13.35    | 1148.363 | 13.30705 | 1148.351 | 13.3156 |
| 13.10382 | 1148.36  | 13.35793 | 1148.37  | 13.35672 | 1148.363 | 13.31    | 1148.351 | 13.32   |
| 13.11    | 1148.36  | 13.36    | 1148.37  | 13.36    | 1148.364 | 13.31705 | 1148.352 | 13.3256 |
| 13.11382 | 1148.361 | 13.36793 | 1148.371 | 13.36672 | 1148.364 | 13.32    | 1148.352 | 13.33   |
| 13.12    | 1148.361 | 13.37    | 1148.371 | 13.37    | 1148.364 | 13.32705 | 1148.353 | 13.3356 |
| 13.12382 | 1148.361 | 13.37793 | 1148.371 | 13.37672 | 1148.365 | 13.33    | 1148.353 | 13.34   |
| 13.13    | 1148.362 | 13.38    | 1148.372 | 13.38    | 1148.365 | 13.33705 | 1148.354 | 13.3456 |
| 13.13382 | 1148.362 | 13.38793 | 1148.372 | 13.38672 | 1148.366 | 13.34    | 1148.354 | 13.35   |
| 13.14    | 1148.363 | 13.39    | 1148.372 | 13.39    | 1148.366 | 13.34705 | 1148.355 | 13.3556 |
| 13.14382 | 1148.363 | 13.39793 | 1148.373 | 13.39672 | 1148.366 | 13.35    | 1148.355 | 13.36   |
| 13.15    | 1148.363 | 13.4     | 1148.373 | 13.4     | 1148.366 | 13.35705 | 1148.356 | 13.3656 |
| 13.15382 | 1148.364 | 13.40793 | 1148.373 | 13.40672 | 1148.367 | 13.36    | 1148.356 | 13.37   |
| 13.16    | 1148.364 | 13.41    | 1148.373 | 13.41    | 1148.367 | 13.36705 | 1148.356 | 13.3756 |
| 13.16382 | 1148.364 | 13.41793 | 1148.374 | 13.41672 | 1148.368 | 13.37    | 1148.357 | 13.38   |
| 13.17    | 1148.365 | 13.42    | 1148.374 | 13.42    | 1148.368 | 13.37705 | 1148.357 | 13.3856 |
| 13.17382 | 1148.365 | 13.42793 | 1148.374 | 13.42672 | 1148.368 | 13.38    | 1148.357 | 13.39   |
| 13.18    | 1148.365 | 13.43    | 1148.374 | 13.43    | 1148.368 | 13.38705 | 1148.358 | 13.3956 |
| 13.18382 | 1148.366 | 13.43793 | 1148.375 | 13.43672 | 1148.369 | 13.39    | 1148.358 | 13.4    |
| 13.19    | 1148.366 | 13.44    | 1148.375 | 13.44    | 1148.369 | 13.39705 | 1148.359 | 13.4056 |
| 13.19382 | 1148.366 | 13.44793 | 1148.375 | 13.44672 | 1148.369 | 13.4     | 1148.359 | 13.41   |
| 13.2     | 1148.367 | 13.45    | 1148.375 | 13.45    | 1148.37  | 13.40705 | 1148.36  | 13.4156 |
| 13.20382 | 1148.367 | 13.45793 | 1148.376 | 13.45672 | 1148.37  | 13.41    | 1148.36  | 13.42   |
| 13.21    | 1148.367 | 13.46    | 1148.376 | 13.46    | 1148.37  | 13.41705 | 1148.36  | 13.4256 |
| 13.21382 | 1148.368 | 13.46793 | 1148.376 | 13.46672 | 1148.371 | 13.42    | 1148.361 | 13.43   |
| 13.22    | 1148.368 | 13.47    | 1148.376 | 13.47    | 1148.371 | 13.42705 | 1148.361 | 13.4356 |
| 13.22382 | 1148.368 | 13.47793 | 1148.377 | 13.47672 | 1148.371 | 13.43    | 1148.361 | 13.44   |

|          |          |          |          |          |          |          |          |         |
|----------|----------|----------|----------|----------|----------|----------|----------|---------|
| 13.23    | 1148.369 | 13.48    | 1148.377 | 13.48    | 1148.371 | 13.43705 | 1148.362 | 13.4456 |
| 13.23382 | 1148.369 | 13.48793 | 1148.377 | 13.48672 | 1148.372 | 13.44    | 1148.362 | 13.45   |
| 13.24    | 1148.369 | 13.49    | 1148.377 | 13.49    | 1148.372 | 13.44705 | 1148.363 | 13.4556 |
| 13.24382 | 1148.369 | 13.49793 | 1148.378 | 13.49672 | 1148.372 | 13.45    | 1148.363 | 13.46   |
| 13.25    | 1148.37  | 13.5     | 1148.378 | 13.5     | 1148.373 | 13.45705 | 1148.363 | 13.4656 |
| 13.25382 | 1148.37  | 13.50793 | 1148.378 | 13.50672 | 1148.373 | 13.46    | 1148.364 | 13.47   |
| 13.26    | 1148.37  | 13.51    | 1148.378 | 13.51    | 1148.373 | 13.46705 | 1148.364 | 13.4756 |
| 13.26382 | 1148.371 | 13.51793 | 1148.379 | 13.51672 | 1148.373 | 13.47    | 1148.364 | 13.48   |
| 13.27    | 1148.371 | 13.52    | 1148.379 | 13.52    | 1148.374 | 13.47705 | 1148.365 | 13.4856 |
| 13.27382 | 1148.371 | 13.52793 | 1148.379 | 13.52672 | 1148.374 | 13.48    | 1148.365 | 13.49   |
| 13.28    | 1148.371 | 13.53    | 1148.379 | 13.53    | 1148.374 | 13.48705 | 1148.365 | 13.4956 |
| 13.28382 | 1148.372 | 13.53793 | 1148.379 | 13.53672 | 1148.375 | 13.49    | 1148.366 | 13.5    |
| 13.29    | 1148.372 | 13.54    | 1148.38  | 13.54    | 1148.375 | 13.49705 | 1148.366 | 13.5056 |
| 13.29382 | 1148.372 | 13.54793 | 1148.38  | 13.54672 | 1148.375 | 13.5     | 1148.366 | 13.51   |
| 13.3     | 1148.373 | 13.55    | 1148.38  | 13.55    | 1148.375 | 13.50705 | 1148.367 | 13.5156 |
| 13.30382 | 1148.373 | 13.55793 | 1148.38  | 13.55672 | 1148.376 | 13.51    | 1148.367 | 13.52   |
| 13.31    | 1148.373 | 13.56    | 1148.38  | 13.56    | 1148.376 | 13.51705 | 1148.367 | 13.5256 |
| 13.31382 | 1148.373 | 13.56793 | 1148.381 | 13.56672 | 1148.376 | 13.52    | 1148.368 | 13.53   |
| 13.32    | 1148.374 | 13.57    | 1148.381 | 13.57    | 1148.376 | 13.52705 | 1148.368 | 13.5356 |
| 13.32382 | 1148.374 | 13.57793 | 1148.381 | 13.57672 | 1148.377 | 13.53    | 1148.368 | 13.54   |
| 13.33    | 1148.374 | 13.58    | 1148.381 | 13.58    | 1148.377 | 13.53705 | 1148.369 | 13.5456 |
| 13.33382 | 1148.374 | 13.58793 | 1148.382 | 13.58672 | 1148.377 | 13.54    | 1148.369 | 13.55   |
| 13.34    | 1148.375 | 13.59    | 1148.382 | 13.59    | 1148.377 | 13.54705 | 1148.369 | 13.5556 |
| 13.34382 | 1148.375 | 13.59793 | 1148.382 | 13.59672 | 1148.377 | 13.55    | 1148.37  | 13.56   |
| 13.35    | 1148.375 | 13.6     | 1148.382 | 13.6     | 1148.378 | 13.55705 | 1148.37  | 13.5656 |
| 13.35382 | 1148.375 | 13.60793 | 1148.382 | 13.60672 | 1148.378 | 13.56    | 1148.37  | 13.57   |
| 13.36    | 1148.376 | 13.61    | 1148.382 | 13.61    | 1148.378 | 13.56705 | 1148.371 | 13.5756 |
| 13.36382 | 1148.376 | 13.61793 | 1148.383 | 13.61672 | 1148.378 | 13.57    | 1148.371 | 13.58   |
| 13.37    | 1148.376 | 13.62    | 1148.383 | 13.62    | 1148.379 | 13.57705 | 1148.371 | 13.5856 |
| 13.37382 | 1148.376 | 13.62793 | 1148.383 | 13.62672 | 1148.379 | 13.58    | 1148.371 | 13.59   |
| 13.38    | 1148.377 | 13.63    | 1148.383 | 13.63    | 1148.379 | 13.58705 | 1148.372 | 13.5956 |
| 13.38382 | 1148.377 | 13.63793 | 1148.383 | 13.63672 | 1148.379 | 13.59    | 1148.372 | 13.6    |
| 13.39    | 1148.377 | 13.64    | 1148.383 | 13.64    | 1148.379 | 13.59705 | 1148.372 | 13.6056 |
| 13.39382 | 1148.377 | 13.64793 | 1148.384 | 13.64672 | 1148.38  | 13.6     | 1148.372 | 13.61   |
| 13.4     | 1148.378 | 13.65    | 1148.384 | 13.65    | 1148.38  | 13.60705 | 1148.373 | 13.6156 |
| 13.40382 | 1148.378 | 13.65793 | 1148.384 | 13.65672 | 1148.38  | 13.61    | 1148.373 | 13.62   |
| 13.41    | 1148.378 | 13.66    | 1148.384 | 13.66    | 1148.38  | 13.61705 | 1148.373 | 13.6256 |
| 13.41382 | 1148.378 | 13.66793 | 1148.384 | 13.66672 | 1148.381 | 13.62    | 1148.374 | 13.63   |
| 13.42    | 1148.379 | 13.67    | 1148.385 | 13.67    | 1148.381 | 13.62705 | 1148.374 | 13.6356 |
| 13.42382 | 1148.379 | 13.67793 | 1148.385 | 13.67672 | 1148.381 | 13.63    | 1148.374 | 13.64   |
| 13.43    | 1148.379 | 13.68    | 1148.385 | 13.68    | 1148.381 | 13.63705 | 1148.375 | 13.6456 |
| 13.43382 | 1148.379 | 13.68793 | 1148.385 | 13.68672 | 1148.381 | 13.64    | 1148.375 | 13.65   |
| 13.44    | 1148.379 | 13.69    | 1148.385 | 13.69    | 1148.382 | 13.64705 | 1148.375 | 13.6556 |
| 13.44382 | 1148.38  | 13.69793 | 1148.385 | 13.69672 | 1148.382 | 13.65    | 1148.375 | 13.66   |
| 13.45    | 1148.38  | 13.7     | 1148.386 | 13.7     | 1148.382 | 13.65705 | 1148.376 | 13.6656 |
| 13.45382 | 1148.38  | 13.70793 | 1148.386 | 13.70672 | 1148.382 | 13.66    | 1148.376 | 13.67   |
| 13.46    | 1148.38  | 13.71    | 1148.386 | 13.71    | 1148.382 | 13.66705 | 1148.376 | 13.6756 |



|          |          |          |          |          |          |          |          |         |
|----------|----------|----------|----------|----------|----------|----------|----------|---------|
| 13.46382 | 1148.38  | 13.71793 | 1148.386 | 13.71672 | 1148.383 | 13.67    | 1148.376 | 13.68   |
| 13.47    | 1148.381 | 13.72    | 1148.386 | 13.72    | 1148.383 | 13.67705 | 1148.377 | 13.6856 |
| 13.47382 | 1148.381 | 13.72793 | 1148.386 | 13.72672 | 1148.383 | 13.68    | 1148.377 | 13.69   |
| 13.48    | 1148.381 | 13.73    | 1148.387 | 13.73    | 1148.383 | 13.68705 | 1148.377 | 13.6956 |
| 13.48382 | 1148.381 | 13.73793 | 1148.387 | 13.73672 | 1148.383 | 13.69    | 1148.377 | 13.7    |
| 13.49    | 1148.382 | 13.74    | 1148.387 | 13.74    | 1148.383 | 13.69705 | 1148.377 | 13.7056 |
| 13.49382 | 1148.382 | 13.74793 | 1148.387 | 13.74672 | 1148.384 | 13.7     | 1148.378 | 13.71   |
| 13.5     | 1148.382 | 13.75    | 1148.387 | 13.75    | 1148.384 | 13.70705 | 1148.378 | 13.7156 |
| 13.50382 | 1148.382 | 13.75793 | 1148.387 | 13.75672 | 1148.384 | 13.71    | 1148.378 | 13.72   |
| 13.51    | 1148.382 | 13.76    | 1148.387 | 13.76    | 1148.384 | 13.71705 | 1148.378 | 13.7256 |
| 13.51382 | 1148.382 | 13.76793 | 1148.388 | 13.76672 | 1148.384 | 13.72    | 1148.379 | 13.73   |
| 13.52    | 1148.383 | 13.77    | 1148.388 | 13.77    | 1148.384 | 13.72705 | 1148.379 | 13.7356 |
| 13.52382 | 1148.383 | 13.77793 | 1148.388 | 13.77672 | 1148.385 | 13.73    | 1148.379 | 13.74   |
| 13.53    | 1148.383 | 13.78    | 1148.388 | 13.78    | 1148.385 | 13.73705 | 1148.379 | 13.7456 |
| 13.53382 | 1148.383 | 13.78793 | 1148.388 | 13.78672 | 1148.385 | 13.74    | 1148.379 | 13.75   |
| 13.54    | 1148.383 | 13.79    | 1148.388 | 13.79    | 1148.385 | 13.74705 | 1148.38  | 13.7556 |
| 13.54382 | 1148.384 | 13.79793 | 1148.388 | 13.79672 | 1148.385 | 13.75    | 1148.38  | 13.76   |
| 13.55    | 1148.384 | 13.8     | 1148.389 | 13.8     | 1148.386 | 13.75705 | 1148.38  | 13.7656 |
| 13.55382 | 1148.384 | 13.80793 | 1148.389 | 13.80672 | 1148.386 | 13.76    | 1148.38  | 13.77   |
| 13.56    | 1148.384 | 13.81    | 1148.389 | 13.81    | 1148.386 | 13.76705 | 1148.381 | 13.7756 |
| 13.56382 | 1148.384 | 13.81793 | 1148.389 | 13.81672 | 1148.386 | 13.77    | 1148.381 | 13.78   |
| 13.57    | 1148.384 | 13.82    | 1148.389 | 13.82    | 1148.386 | 13.77705 | 1148.381 | 13.7856 |
| 13.57382 | 1148.385 | 13.82793 | 1148.389 | 13.82672 | 1148.386 | 13.78    | 1148.381 | 13.79   |
| 13.58    | 1148.385 | 13.83    | 1148.389 | 13.83    | 1148.386 | 13.78705 | 1148.381 | 13.7956 |
| 13.58382 | 1148.385 | 13.83793 | 1148.39  | 13.83672 | 1148.387 | 13.79    | 1148.382 | 13.8    |
| 13.59    | 1148.385 | 13.84    | 1148.39  | 13.84    | 1148.387 | 13.79705 | 1148.382 | 13.8056 |
| 13.59382 | 1148.385 | 13.84793 | 1148.39  | 13.84672 | 1148.387 | 13.8     | 1148.382 | 13.81   |
| 13.6     | 1148.385 | 13.85    | 1148.39  | 13.85    | 1148.387 | 13.80705 | 1148.382 | 13.8156 |
| 13.60382 | 1148.386 | 13.85793 | 1148.39  | 13.85672 | 1148.387 | 13.81    | 1148.382 | 13.82   |
| 13.61    | 1148.386 | 13.86    | 1148.39  | 13.86    | 1148.387 | 13.81705 | 1148.383 | 13.8256 |
| 13.61382 | 1148.386 | 13.86793 | 1148.39  | 13.86672 | 1148.388 | 13.82    | 1148.383 | 13.83   |
| 13.62    | 1148.386 | 13.87    | 1148.39  | 13.87    | 1148.388 | 13.82705 | 1148.383 | 13.8356 |
| 13.62382 | 1148.386 | 13.87793 | 1148.391 | 13.87672 | 1148.388 | 13.83    | 1148.383 | 13.84   |
| 13.63    | 1148.386 | 13.88    | 1148.391 | 13.88    | 1148.388 | 13.83705 | 1148.383 | 13.8456 |
| 13.63382 | 1148.387 | 13.88793 | 1148.391 | 13.88672 | 1148.388 | 13.84    | 1148.383 | 13.85   |
| 13.64    | 1148.387 | 13.89    | 1148.391 | 13.89    | 1148.388 | 13.84705 | 1148.384 | 13.8556 |
| 13.64382 | 1148.387 | 13.89793 | 1148.391 | 13.89672 | 1148.388 | 13.85    | 1148.384 | 13.86   |
| 13.65    | 1148.387 | 13.9     | 1148.391 | 13.9     | 1148.388 | 13.85705 | 1148.384 | 13.8656 |
| 13.65382 | 1148.387 | 13.90793 | 1148.391 | 13.90672 | 1148.389 | 13.86    | 1148.384 | 13.87   |
| 13.66    | 1148.387 | 13.91    | 1148.391 | 13.91    | 1148.389 | 13.86705 | 1148.384 | 13.8756 |
| 13.66382 | 1148.387 | 13.91793 | 1148.391 | 13.91672 | 1148.389 | 13.87    | 1148.385 | 13.88   |
| 13.67    | 1148.388 | 13.92    | 1148.391 | 13.92    | 1148.389 | 13.87705 | 1148.385 | 13.8856 |
| 13.67382 | 1148.388 | 13.92793 | 1148.392 | 13.92672 | 1148.389 | 13.88    | 1148.385 | 13.89   |
| 13.68    | 1148.388 | 13.93    | 1148.392 | 13.93    | 1148.389 | 13.88705 | 1148.385 | 13.8956 |
| 13.68382 | 1148.388 | 13.93793 | 1148.392 | 13.93672 | 1148.389 | 13.89    | 1148.385 | 13.9    |
| 13.69    | 1148.388 | 13.94    | 1148.392 | 13.94    | 1148.39  | 13.89705 | 1148.385 | 13.9056 |
| 13.69382 | 1148.388 | 13.94793 | 1148.392 | 13.94672 | 1148.39  | 13.9     | 1148.386 | 13.91   |

|          |          |          |          |          |          |          |          |         |
|----------|----------|----------|----------|----------|----------|----------|----------|---------|
| 13.7     | 1148.388 | 13.95    | 1148.392 | 13.95    | 1148.39  | 13.90705 | 1148.386 | 13.9156 |
| 13.70382 | 1148.389 | 13.95793 | 1148.392 | 13.95672 | 1148.39  | 13.91    | 1148.386 | 13.92   |
| 13.71    | 1148.389 | 13.96    | 1148.392 | 13.96    | 1148.39  | 13.91705 | 1148.386 | 13.9256 |
| 13.71382 | 1148.389 | 13.96793 | 1148.392 | 13.96672 | 1148.39  | 13.92    | 1148.386 | 13.93   |
| 13.72    | 1148.389 | 13.97    | 1148.392 | 13.97    | 1148.39  | 13.92705 | 1148.386 | 13.9356 |
| 13.72382 | 1148.389 | 13.97793 | 1148.393 | 13.97672 | 1148.39  | 13.93    | 1148.386 | 13.94   |
| 13.73    | 1148.389 | 13.98    | 1148.393 | 13.98    | 1148.391 | 13.93705 | 1148.387 | 13.9456 |
| 13.73382 | 1148.389 | 13.98793 | 1148.393 | 13.98672 | 1148.391 | 13.94    | 1148.387 | 13.95   |
| 13.74    | 1148.389 | 13.99    | 1148.393 | 13.99    | 1148.391 | 13.94705 | 1148.387 | 13.9556 |
| 13.74382 | 1148.39  | 13.99793 | 1148.393 | 13.99672 | 1148.391 | 13.95    | 1148.387 | 13.96   |
| 13.75    | 1148.39  | 14       | 1148.393 | 14       | 1148.391 | 13.95705 | 1148.387 | 13.9656 |
| 13.75382 | 1148.39  | 14.00793 | 1148.393 | 14.00672 | 1148.391 | 13.96    | 1148.387 | 13.97   |
| 13.76    | 1148.39  | 14.01    | 1148.393 | 14.01    | 1148.391 | 13.96705 | 1148.388 | 13.9756 |
| 13.76382 | 1148.39  | 14.01793 | 1148.393 | 14.01672 | 1148.391 | 13.97    | 1148.388 | 13.98   |
| 13.77    | 1148.39  | 14.02    | 1148.393 | 14.02    | 1148.391 | 13.97705 | 1148.388 | 13.9856 |
| 13.77382 | 1148.39  | 14.02793 | 1148.394 | 14.02672 | 1148.392 | 13.98    | 1148.388 | 13.99   |
| 13.78    | 1148.39  | 14.03    | 1148.394 | 14.03    | 1148.392 | 13.98705 | 1148.388 | 13.9956 |
| 13.78382 | 1148.391 | 14.03793 | 1148.394 | 14.03672 | 1148.392 | 13.99    | 1148.388 | 14      |
| 13.79    | 1148.391 | 14.04    | 1148.394 | 14.04    | 1148.392 | 13.99705 | 1148.388 | 14.0056 |
| 13.79382 | 1148.391 | 14.04793 | 1148.394 | 14.04672 | 1148.392 | 14       | 1148.388 | 14.01   |
| 13.8     | 1148.391 | 14.05    | 1148.394 | 14.05    | 1148.392 | 14.00705 | 1148.389 | 14.0156 |
| 13.80382 | 1148.391 | 14.05793 | 1148.394 | 14.05672 | 1148.392 | 14.01    | 1148.389 | 14.02   |
| 13.81    | 1148.391 | 14.06    | 1148.394 | 14.06    | 1148.392 | 14.01705 | 1148.389 | 14.0256 |
| 13.81382 | 1148.391 | 14.06793 | 1148.394 | 14.06672 | 1148.392 | 14.02    | 1148.389 | 14.03   |
| 13.82    | 1148.391 | 14.07    | 1148.394 | 14.07    | 1148.392 | 14.02705 | 1148.389 | 14.0356 |
| 13.82382 | 1148.391 | 14.07793 | 1148.394 | 14.07672 | 1148.393 | 14.03    | 1148.389 | 14.04   |
| 13.83    | 1148.392 | 14.08    | 1148.394 | 14.08    | 1148.393 | 14.03705 | 1148.389 | 14.0456 |
| 13.83382 | 1148.392 | 14.08793 | 1148.395 | 14.08672 | 1148.393 | 14.04    | 1148.39  | 14.05   |
| 13.84    | 1148.392 | 14.09    | 1148.395 | 14.09    | 1148.393 | 14.04705 | 1148.39  | 14.0556 |
| 13.84382 | 1148.392 | 14.09793 | 1148.395 | 14.09672 | 1148.393 | 14.05    | 1148.39  | 14.06   |
| 13.85    | 1148.392 | 14.1     | 1148.395 | 14.1     | 1148.393 | 14.05705 | 1148.39  | 14.0656 |
| 13.85382 | 1148.392 | 14.10793 | 1148.395 | 14.10672 | 1148.393 | 14.06    | 1148.39  | 14.07   |
| 13.86    | 1148.392 | 14.11    | 1148.395 | 14.11    | 1148.393 | 14.06705 | 1148.39  | 14.0756 |
| 13.86382 | 1148.392 | 14.11793 | 1148.395 | 14.11672 | 1148.393 | 14.07    | 1148.39  | 14.08   |
| 13.87    | 1148.392 | 14.12    | 1148.395 | 14.12    | 1148.393 | 14.07705 | 1148.39  | 14.0856 |
| 13.87382 | 1148.392 | 14.12793 | 1148.395 | 14.12672 | 1148.394 | 14.08    | 1148.391 | 14.09   |
| 13.88    | 1148.393 | 14.13    | 1148.395 | 14.13    | 1148.394 | 14.08705 | 1148.391 | 14.0956 |
| 13.88382 | 1148.393 | 14.13793 | 1148.395 | 14.13672 | 1148.394 | 14.09    | 1148.391 | 14.1    |
| 13.89    | 1148.393 | 14.14    | 1148.395 | 14.14    | 1148.394 | 14.09705 | 1148.391 | 14.1056 |
| 13.89382 | 1148.393 | 14.14793 | 1148.395 | 14.14672 | 1148.394 | 14.1     | 1148.391 | 14.11   |
| 13.9     | 1148.393 | 14.15    | 1148.396 | 14.15    | 1148.394 | 14.10705 | 1148.391 | 14.1156 |
| 13.90382 | 1148.393 | 14.15793 | 1148.396 | 14.15672 | 1148.394 | 14.11    | 1148.391 | 14.12   |
| 13.91    | 1148.393 | 14.16    | 1148.396 | 14.16    | 1148.394 | 14.11705 | 1148.391 | 14.1256 |
| 13.91382 | 1148.393 | 14.16793 | 1148.396 | 14.16672 | 1148.394 | 14.12    | 1148.391 | 14.13   |
| 13.92    | 1148.393 | 14.17    | 1148.396 | 14.17    | 1148.394 | 14.12705 | 1148.392 | 14.1356 |
| 13.92382 | 1148.393 | 14.17793 | 1148.396 | 14.17672 | 1148.394 | 14.13    | 1148.392 | 14.14   |
| 13.93    | 1148.394 | 14.18    | 1148.396 | 14.18    | 1148.394 | 14.13705 | 1148.392 | 14.1456 |

|          |          |          |          |          |          |          |          |         |
|----------|----------|----------|----------|----------|----------|----------|----------|---------|
| 13.93382 | 1148.394 | 14.18793 | 1148.396 | 14.18672 | 1148.395 | 14.14    | 1148.392 | 14.15   |
| 13.94    | 1148.394 | 14.19    | 1148.396 | 14.19    | 1148.395 | 14.14705 | 1148.392 | 14.1556 |
| 13.94382 | 1148.394 | 14.19793 | 1148.396 | 14.19672 | 1148.395 | 14.15    | 1148.392 | 14.16   |
| 13.95    | 1148.394 | 14.2     | 1148.396 | 14.2     | 1148.395 | 14.15705 | 1148.392 | 14.1656 |
| 13.95382 | 1148.394 | 14.20793 | 1148.396 | 14.20672 | 1148.395 | 14.16    | 1148.392 | 14.17   |
| 13.96    | 1148.394 | 14.21    | 1148.396 | 14.21    | 1148.395 | 14.16705 | 1148.392 | 14.1756 |
| 13.96382 | 1148.394 | 14.21793 | 1148.396 | 14.21672 | 1148.395 | 14.17    | 1148.392 | 14.18   |
| 13.97    | 1148.394 | 14.22    | 1148.396 | 14.22    | 1148.395 | 14.17705 | 1148.393 | 14.1856 |
| 13.97382 | 1148.394 | 14.22793 | 1148.397 | 14.22672 | 1148.395 | 14.18    | 1148.393 | 14.19   |
| 13.98    | 1148.394 | 14.23    | 1148.397 | 14.23    | 1148.395 | 14.18705 | 1148.393 | 14.1956 |
| 13.98382 | 1148.394 | 14.23793 | 1148.397 | 14.23672 | 1148.395 | 14.19    | 1148.393 | 14.2    |
| 13.99    | 1148.395 | 14.24    | 1148.397 | 14.24    | 1148.395 | 14.19705 | 1148.393 | 14.2056 |
| 13.99382 | 1148.395 | 14.24793 | 1148.397 | 14.24672 | 1148.395 | 14.2     | 1148.393 | 14.21   |
| 14       | 1148.395 | 14.25    | 1148.397 | 14.25    | 1148.395 | 14.20705 | 1148.393 | 14.2156 |
| 14.00382 | 1148.395 | 14.25793 | 1148.397 | 14.25672 | 1148.396 | 14.21    | 1148.393 | 14.22   |
| 14.01    | 1148.395 | 14.26    | 1148.397 | 14.26    | 1148.396 | 14.21705 | 1148.393 | 14.2256 |
| 14.01382 | 1148.395 | 14.26793 | 1148.397 | 14.26672 | 1148.396 | 14.22    | 1148.393 | 14.23   |
| 14.02    | 1148.395 | 14.27    | 1148.397 | 14.27    | 1148.396 | 14.22705 | 1148.394 | 14.2356 |
| 14.02382 | 1148.395 | 14.27793 | 1148.397 | 14.27672 | 1148.396 | 14.23    | 1148.394 | 14.24   |
| 14.03    | 1148.395 | 14.28    | 1148.397 | 14.28    | 1148.396 | 14.23705 | 1148.394 | 14.2456 |
| 14.03382 | 1148.395 | 14.28793 | 1148.397 | 14.28672 | 1148.396 | 14.24    | 1148.394 | 14.25   |
| 14.04    | 1148.395 | 14.29    | 1148.397 | 14.29    | 1148.396 | 14.24705 | 1148.394 | 14.2556 |
| 14.04382 | 1148.395 | 14.29793 | 1148.397 | 14.29672 | 1148.396 | 14.25    | 1148.394 | 14.26   |
| 14.05    | 1148.395 | 14.3     | 1148.397 | 14.3     | 1148.396 | 14.25705 | 1148.394 | 14.2656 |
| 14.05382 | 1148.395 | 14.30793 | 1148.397 | 14.30672 | 1148.396 | 14.26    | 1148.394 | 14.27   |
| 14.06    | 1148.396 | 14.31    | 1148.397 | 14.31    | 1148.396 | 14.26705 | 1148.394 | 14.2756 |
| 14.06382 | 1148.396 | 14.31793 | 1148.398 | 14.31672 | 1148.396 | 14.27    | 1148.394 | 14.28   |
| 14.07    | 1148.396 | 14.32    | 1148.398 | 14.32    | 1148.396 | 14.27705 | 1148.394 | 14.2856 |
| 14.07382 | 1148.396 | 14.32793 | 1148.398 | 14.32672 | 1148.397 | 14.28    | 1148.394 | 14.29   |
| 14.08    | 1148.396 | 14.33    | 1148.398 | 14.33    | 1148.397 | 14.28705 | 1148.395 | 14.2956 |
| 14.08382 | 1148.396 | 14.33793 | 1148.398 | 14.33672 | 1148.397 | 14.29    | 1148.395 | 14.3    |
| 14.09    | 1148.396 | 14.34    | 1148.398 | 14.34    | 1148.397 | 14.29705 | 1148.395 | 14.3056 |
| 14.09382 | 1148.396 | 14.34793 | 1148.398 | 14.34672 | 1148.397 | 14.3     | 1148.395 | 14.31   |
| 14.1     | 1148.396 | 14.35    | 1148.398 | 14.35    | 1148.397 | 14.30705 | 1148.395 | 14.3156 |
| 14.10382 | 1148.396 | 14.35793 | 1148.398 | 14.35672 | 1148.397 | 14.31    | 1148.395 | 14.32   |
| 14.11    | 1148.396 | 14.36    | 1148.398 | 14.36    | 1148.397 | 14.31705 | 1148.395 | 14.3256 |
| 14.11382 | 1148.396 | 14.36793 | 1148.398 | 14.36672 | 1148.397 | 14.32    | 1148.395 | 14.33   |
| 14.12    | 1148.396 | 14.37    | 1148.398 | 14.37    | 1148.397 | 14.32705 | 1148.395 | 14.3356 |
| 14.12382 | 1148.396 | 14.37793 | 1148.398 | 14.37672 | 1148.397 | 14.33    | 1148.395 | 14.34   |
| 14.13    | 1148.397 | 14.38    | 1148.398 | 14.38    | 1148.397 | 14.33705 | 1148.395 | 14.3456 |
| 14.13382 | 1148.397 | 14.38793 | 1148.398 | 14.38672 | 1148.397 | 14.34    | 1148.395 | 14.35   |
| 14.14    | 1148.397 | 14.39    | 1148.398 | 14.39    | 1148.397 | 14.34705 | 1148.395 | 14.3556 |
| 14.14382 | 1148.397 | 14.39793 | 1148.398 | 14.39672 | 1148.397 | 14.35    | 1148.396 | 14.36   |
| 14.15    | 1148.397 | 14.4     | 1148.398 | 14.4     | 1148.397 | 14.35705 | 1148.396 | 14.3656 |
| 14.15382 | 1148.397 | 14.40793 | 1148.398 | 14.40672 | 1148.397 | 14.36    | 1148.396 | 14.37   |
| 14.16    | 1148.397 | 14.41    | 1148.398 | 14.41    | 1148.397 | 14.36705 | 1148.396 | 14.3756 |
| 14.16382 | 1148.397 | 14.41793 | 1148.398 | 14.41672 | 1148.398 | 14.37    | 1148.396 | 14.38   |

|          |          |          |          |          |          |          |          |         |
|----------|----------|----------|----------|----------|----------|----------|----------|---------|
| 14.17    | 1148.397 | 14.42    | 1148.399 | 14.42    | 1148.398 | 14.37705 | 1148.396 | 14.3856 |
| 14.17382 | 1148.397 | 14.42793 | 1148.399 | 14.42672 | 1148.398 | 14.38    | 1148.396 | 14.39   |
| 14.18    | 1148.397 | 14.43    | 1148.399 | 14.43    | 1148.398 | 14.38705 | 1148.396 | 14.3956 |
| 14.18382 | 1148.397 | 14.43793 | 1148.399 | 14.43672 | 1148.398 | 14.39    | 1148.396 | 14.4    |
| 14.19    | 1148.397 | 14.44    | 1148.399 | 14.44    | 1148.398 | 14.39705 | 1148.396 | 14.4056 |
| 14.19382 | 1148.397 | 14.44793 | 1148.399 | 14.44672 | 1148.398 | 14.4     | 1148.396 | 14.41   |
| 14.2     | 1148.397 | 14.45    | 1148.399 | 14.45    | 1148.398 | 14.40705 | 1148.396 | 14.4156 |
| 14.20382 | 1148.397 | 14.45793 | 1148.399 | 14.45672 | 1148.398 | 14.41    | 1148.396 | 14.42   |
| 14.21    | 1148.397 | 14.46    | 1148.399 | 14.46    | 1148.398 | 14.41705 | 1148.396 | 14.4256 |
| 14.21382 | 1148.397 | 14.46793 | 1148.399 | 14.46672 | 1148.398 | 14.42    | 1148.396 | 14.43   |
| 14.22    | 1148.398 | 14.47    | 1148.399 | 14.47    | 1148.398 | 14.42705 | 1148.397 | 14.4356 |
| 14.22382 | 1148.398 | 14.47793 | 1148.399 | 14.47672 | 1148.398 | 14.43    | 1148.397 | 14.44   |
| 14.23    | 1148.398 | 14.48    | 1148.399 | 14.48    | 1148.398 | 14.43705 | 1148.397 | 14.4456 |
| 14.23382 | 1148.398 | 14.48793 | 1148.399 | 14.48672 | 1148.398 | 14.44    | 1148.397 | 14.45   |
| 14.24    | 1148.398 | 14.49    | 1148.399 | 14.49    | 1148.398 | 14.44705 | 1148.397 | 14.4556 |
| 14.24382 | 1148.398 | 14.49793 | 1148.399 | 14.49672 | 1148.398 | 14.45    | 1148.397 | 14.46   |
| 14.25    | 1148.398 | 14.5     | 1148.399 | 14.5     | 1148.398 | 14.45705 | 1148.397 | 14.4656 |
| 14.25382 | 1148.398 | 14.50793 | 1148.399 | 14.50672 | 1148.398 | 14.46    | 1148.397 | 14.47   |
| 14.26    | 1148.398 | 14.51    | 1148.399 | 14.51    | 1148.398 | 14.46705 | 1148.397 | 14.4756 |
| 14.26382 | 1148.398 | 14.51793 | 1148.399 | 14.51672 | 1148.398 | 14.47    | 1148.397 | 14.48   |
| 14.27    | 1148.398 | 14.52    | 1148.399 | 14.52    | 1148.399 | 14.47705 | 1148.397 | 14.4856 |
| 14.27382 | 1148.398 | 14.52793 | 1148.399 | 14.52672 | 1148.399 | 14.48    | 1148.397 | 14.49   |
| 14.28    | 1148.398 | 14.53    | 1148.399 | 14.53    | 1148.399 | 14.48705 | 1148.397 | 14.4956 |
| 14.28382 | 1148.398 | 14.53793 | 1148.399 | 14.53672 | 1148.399 | 14.49    | 1148.397 | 14.5    |
| 14.29    | 1148.398 | 14.54    | 1148.399 | 14.54    | 1148.399 | 14.49705 | 1148.397 | 14.5056 |
| 14.29382 | 1148.398 | 14.54793 | 1148.399 | 14.54672 | 1148.399 | 14.5     | 1148.397 | 14.51   |
| 14.3     | 1148.398 | 14.55    | 1148.399 | 14.55    | 1148.399 | 14.50705 | 1148.397 | 14.5156 |
| 14.30382 | 1148.398 | 14.55793 | 1148.4   | 14.55672 | 1148.399 | 14.51    | 1148.397 | 14.52   |
| 14.31    | 1148.398 | 14.56    | 1148.4   | 14.56    | 1148.399 | 14.51705 | 1148.398 | 14.5256 |
| 14.31382 | 1148.398 | 14.56793 | 1148.4   | 14.56672 | 1148.399 | 14.52    | 1148.398 | 14.53   |
| 14.32    | 1148.398 | 14.57    | 1148.4   | 14.57    | 1148.399 | 14.52705 | 1148.398 | 14.5356 |
| 14.32382 | 1148.398 | 14.57793 | 1148.4   | 14.57672 | 1148.399 | 14.53    | 1148.398 | 14.54   |
| 14.33    | 1148.399 | 14.58    | 1148.4   | 14.58    | 1148.399 | 14.53705 | 1148.398 | 14.5456 |
| 14.33382 | 1148.399 | 14.58793 | 1148.4   | 14.58672 | 1148.399 | 14.54    | 1148.398 | 14.55   |
| 14.34    | 1148.399 | 14.59    | 1148.4   | 14.59    | 1148.399 | 14.54705 | 1148.398 | 14.5556 |
| 14.34382 | 1148.399 | 14.59793 | 1148.4   | 14.59672 | 1148.399 | 14.55    | 1148.398 | 14.56   |
| 14.35    | 1148.399 | 14.6     | 1148.4   | 14.6     | 1148.399 | 14.55705 | 1148.398 | 14.5656 |
| 14.35382 | 1148.399 | 14.60793 | 1148.4   | 14.60672 | 1148.399 | 14.56    | 1148.398 | 14.57   |
| 14.36    | 1148.399 | 14.61    | 1148.4   | 14.61    | 1148.399 | 14.56705 | 1148.398 | 14.5756 |
| 14.36382 | 1148.399 | 14.61793 | 1148.4   | 14.61672 | 1148.399 | 14.57    | 1148.398 | 14.58   |
| 14.37    | 1148.399 | 14.62    | 1148.4   | 14.62    | 1148.399 | 14.57705 | 1148.398 | 14.5856 |
| 14.37382 | 1148.399 | 14.62793 | 1148.4   | 14.62672 | 1148.399 | 14.58    | 1148.398 | 14.59   |
| 14.38    | 1148.399 | 14.63    | 1148.4   | 14.63    | 1148.399 | 14.58705 | 1148.398 | 14.5956 |
| 14.38382 | 1148.399 | 14.63793 | 1148.4   | 14.63672 | 1148.399 | 14.59    | 1148.398 | 14.6    |
| 14.39    | 1148.399 | 14.64    | 1148.4   | 14.64    | 1148.399 | 14.59705 | 1148.398 | 14.6056 |
| 14.39382 | 1148.399 | 14.64793 | 1148.4   | 14.64672 | 1148.399 | 14.6     | 1148.398 | 14.61   |
| 14.4     | 1148.399 | 14.65    | 1148.4   | 14.65    | 1148.399 | 14.60705 | 1148.398 | 14.6156 |

|          |          |          |          |          |          |          |          |         |
|----------|----------|----------|----------|----------|----------|----------|----------|---------|
| 14.40382 | 1148.399 | 14.65793 | 1148.4   | 14.65672 | 1148.4   | 14.61    | 1148.398 | 14.62   |
| 14.41    | 1148.399 | 14.66    | 1148.4   | 14.66    | 1148.4   | 14.61705 | 1148.398 | 14.6256 |
| 14.41382 | 1148.399 | 14.66793 | 1148.4   | 14.66672 | 1148.4   | 14.62    | 1148.399 | 14.63   |
| 14.42    | 1148.399 | 14.67    | 1148.4   | 14.67    | 1148.4   | 14.62705 | 1148.399 | 14.6356 |
| 14.42382 | 1148.399 | 14.67793 | 1148.4   | 14.67672 | 1148.4   | 14.63    | 1148.399 | 14.64   |
| 14.43    | 1148.399 | 14.68    | 1148.4   | 14.68    | 1148.4   | 14.63705 | 1148.399 | 14.6456 |
| 14.43382 | 1148.399 | 14.68793 | 1148.4   | 14.68672 | 1148.4   | 14.64    | 1148.399 | 14.65   |
| 14.44    | 1148.399 | 14.69    | 1148.4   | 14.69    | 1148.4   | 14.64705 | 1148.399 | 14.6556 |
| 14.44382 | 1148.399 | 14.69793 | 1148.4   | 14.69672 | 1148.4   | 14.65    | 1148.399 | 14.66   |
| 14.45    | 1148.399 | 14.7     | 1148.4   | 14.7     | 1148.4   | 14.65705 | 1148.399 | 14.6656 |
| 14.45382 | 1148.399 | 14.70793 | 1148.4   | 14.70672 | 1148.4   | 14.66    | 1148.399 | 14.67   |
| 14.46    | 1148.4   | 14.71    | 1148.4   | 14.71    | 1148.4   | 14.66705 | 1148.399 | 14.6756 |
| 14.46382 | 1148.4   | 14.71793 | 1148.4   | 14.71672 | 1148.4   | 14.67    | 1148.399 | 14.68   |
| 14.47    | 1148.4   | 14.72    | 1148.4   | 14.72    | 1148.4   | 14.67705 | 1148.399 | 14.6856 |
| 14.47382 | 1148.4   | 14.72793 | 1148.4   | 14.72672 | 1148.4   | 14.68    | 1148.399 | 14.69   |
| 14.48    | 1148.4   | 14.73    | 1148.401 | 14.73    | 1148.4   | 14.68705 | 1148.399 | 14.6956 |
| 14.48382 | 1148.4   | 14.73793 | 1148.401 | 14.73672 | 1148.4   | 14.69    | 1148.399 | 14.7    |
| 14.49    | 1148.4   | 14.74    | 1148.401 | 14.74    | 1148.4   | 14.69705 | 1148.399 | 14.7056 |
| 14.49382 | 1148.4   | 14.74793 | 1148.401 | 14.74672 | 1148.4   | 14.7     | 1148.399 | 14.71   |
| 14.5     | 1148.4   | 14.75    | 1148.401 | 14.75    | 1148.4   | 14.70705 | 1148.399 | 14.7156 |
| 14.50382 | 1148.4   | 14.75793 | 1148.401 | 14.75672 | 1148.4   | 14.71    | 1148.399 | 14.72   |
| 14.51    | 1148.4   | 14.76    | 1148.401 | 14.76    | 1148.4   | 14.71705 | 1148.399 | 14.7256 |
| 14.51382 | 1148.4   | 14.76793 | 1148.401 | 14.76672 | 1148.4   | 14.72    | 1148.399 | 14.73   |
| 14.52    | 1148.4   | 14.77    | 1148.401 | 14.77    | 1148.4   | 14.72705 | 1148.399 | 14.7356 |
| 14.52382 | 1148.4   | 14.77793 | 1148.401 | 14.77672 | 1148.4   | 14.73    | 1148.399 | 14.74   |
| 14.53    | 1148.4   | 14.78    | 1148.401 | 14.78    | 1148.4   | 14.73705 | 1148.399 | 14.7456 |
| 14.53382 | 1148.4   | 14.78793 | 1148.401 | 14.78672 | 1148.4   | 14.74    | 1148.399 | 14.75   |
| 14.54    | 1148.4   | 14.79    | 1148.401 | 14.79    | 1148.4   | 14.74705 | 1148.399 | 14.7556 |
| 14.54382 | 1148.4   | 14.79793 | 1148.401 | 14.79672 | 1148.4   | 14.75    | 1148.399 | 14.76   |
| 14.55    | 1148.4   | 14.8     | 1148.401 | 14.8     | 1148.4   | 14.75705 | 1148.4   | 14.7656 |
| 14.55382 | 1148.4   | 14.80793 | 1148.401 | 14.80672 | 1148.4   | 14.76    | 1148.4   | 14.77   |
| 14.56    | 1148.4   | 14.81    | 1148.401 | 14.81    | 1148.4   | 14.76705 | 1148.4   | 14.7756 |
| 14.56382 | 1148.4   | 14.81793 | 1148.401 | 14.81672 | 1148.4   | 14.77    | 1148.4   | 14.78   |
| 14.57    | 1148.4   | 14.82    | 1148.401 | 14.82    | 1148.4   | 14.77705 | 1148.4   | 14.7856 |
| 14.57382 | 1148.4   | 14.82793 | 1148.401 | 14.82672 | 1148.4   | 14.78    | 1148.4   | 14.79   |
| 14.58    | 1148.4   | 14.83    | 1148.401 | 14.83    | 1148.4   | 14.78705 | 1148.4   | 14.7956 |
| 14.58382 | 1148.4   | 14.83793 | 1148.401 | 14.83672 | 1148.401 | 14.79    | 1148.4   | 14.8    |
| 14.59    | 1148.4   | 14.84    | 1148.401 | 14.84    | 1148.401 | 14.79705 | 1148.4   | 14.8056 |
| 14.59382 | 1148.4   | 14.84793 | 1148.401 | 14.84672 | 1148.401 | 14.8     | 1148.4   | 14.81   |
| 14.6     | 1148.4   | 14.85    | 1148.401 | 14.85    | 1148.401 | 14.80705 | 1148.4   | 14.8156 |
| 14.60382 | 1148.4   | 14.85793 | 1148.401 | 14.85672 | 1148.401 | 14.81    | 1148.4   | 14.82   |
| 14.61    | 1148.4   | 14.86    | 1148.401 | 14.86    | 1148.401 | 14.81705 | 1148.4   | 14.8256 |
| 14.61382 | 1148.4   | 14.86793 | 1148.401 | 14.86672 | 1148.401 | 14.82    | 1148.4   | 14.83   |
| 14.62    | 1148.4   | 14.87    | 1148.401 | 14.87    | 1148.401 | 14.82705 | 1148.4   | 14.8356 |
| 14.62382 | 1148.4   | 14.87793 | 1148.401 | 14.87672 | 1148.401 | 14.83    | 1148.4   | 14.84   |
| 14.63    | 1148.4   | 14.88    | 1148.401 | 14.88    | 1148.401 | 14.83705 | 1148.4   | 14.8456 |
| 14.63382 | 1148.4   | 14.88793 | 1148.401 | 14.88672 | 1148.401 | 14.84    | 1148.4   | 14.85   |

|          |          |          |          |          |          |          |          |         |
|----------|----------|----------|----------|----------|----------|----------|----------|---------|
| 14.64    | 1148.401 | 14.89    | 1148.401 | 14.89    | 1148.401 | 14.84705 | 1148.4   | 14.8556 |
| 14.64382 | 1148.401 | 14.89793 | 1148.401 | 14.89672 | 1148.401 | 14.85    | 1148.4   | 14.86   |
| 14.65    | 1148.401 | 14.9     | 1148.401 | 14.9     | 1148.401 | 14.85705 | 1148.4   | 14.8656 |
| 14.65382 | 1148.401 | 14.90793 | 1148.401 | 14.90672 | 1148.401 | 14.86    | 1148.4   | 14.87   |
| 14.66    | 1148.401 | 14.91    | 1148.401 | 14.91    | 1148.401 | 14.86705 | 1148.4   | 14.8756 |
| 14.66382 | 1148.401 | 14.91793 | 1148.401 | 14.91672 | 1148.401 | 14.87    | 1148.4   | 14.88   |
| 14.67    | 1148.401 | 14.92    | 1148.401 | 14.92    | 1148.401 | 14.87705 | 1148.4   | 14.8856 |
| 14.67382 | 1148.401 | 14.92793 | 1148.401 | 14.92672 | 1148.401 | 14.88    | 1148.4   | 14.89   |
| 14.68    | 1148.401 | 14.93    | 1148.401 | 14.93    | 1148.401 | 14.88705 | 1148.4   | 14.8956 |
| 14.68382 | 1148.401 | 14.93793 | 1148.401 | 14.93672 | 1148.401 | 14.89    | 1148.4   | 14.9    |
| 14.69    | 1148.401 | 14.94    | 1148.401 | 14.94    | 1148.401 | 14.89705 | 1148.4   | 14.9056 |
| 14.69382 | 1148.401 | 14.94793 | 1148.401 | 14.94672 | 1148.401 | 14.9     | 1148.4   | 14.91   |
| 14.7     | 1148.401 | 14.95    | 1148.401 | 14.95    | 1148.401 | 14.90705 | 1148.4   | 14.9156 |
| 14.70382 | 1148.401 | 14.95793 | 1148.401 | 14.95672 | 1148.401 | 14.91    | 1148.4   | 14.92   |
| 14.71    | 1148.401 | 14.96    | 1148.401 | 14.96    | 1148.401 | 14.91705 | 1148.4   | 14.9256 |
| 14.71382 | 1148.401 | 14.96793 | 1148.401 | 14.96672 | 1148.401 | 14.92    | 1148.4   | 14.93   |
| 14.72    | 1148.401 | 14.97    | 1148.401 | 14.97    | 1148.401 | 14.92705 | 1148.4   | 14.9356 |
| 14.72382 | 1148.401 | 14.97793 | 1148.401 | 14.97672 | 1148.401 | 14.93    | 1148.4   | 14.94   |
| 14.73    | 1148.401 | 14.98    | 1148.401 | 14.98    | 1148.401 | 14.93705 | 1148.401 | 14.9456 |
| 14.73382 | 1148.401 | 14.98793 | 1148.401 | 14.98672 | 1148.401 | 14.94    | 1148.401 | 14.95   |
| 14.74    | 1148.401 | 14.99    | 1148.401 | 14.99    | 1148.401 | 14.94705 | 1148.401 | 14.9556 |
| 14.74382 | 1148.401 | 14.99793 | 1148.401 | 14.99672 | 1148.401 | 14.95    | 1148.401 | 14.96   |
| 14.75    | 1148.401 | 15       | 1148.401 | 15       | 1148.401 | 14.95705 | 1148.401 | 14.9656 |
| 14.75382 | 1148.401 | 15.00793 | 1148.402 | 15.00672 | 1148.401 | 14.96    | 1148.401 | 14.97   |
| 14.76    | 1148.401 | 15.01    | 1148.402 | 15.01    | 1148.401 | 14.96705 | 1148.401 | 14.9756 |
| 14.76382 | 1148.401 | 15.01793 | 1148.402 | 15.01672 | 1148.401 | 14.97    | 1148.401 | 14.98   |
| 14.77    | 1148.401 | 15.02    | 1148.402 | 15.02    | 1148.401 | 14.97705 | 1148.401 | 14.9856 |
| 14.77382 | 1148.401 | 15.02793 | 1148.402 | 15.02672 | 1148.401 | 14.98    | 1148.401 | 14.99   |
| 14.78    | 1148.401 | 15.03    | 1148.402 | 15.03    | 1148.401 | 14.98705 | 1148.401 | 14.9956 |
| 14.78382 | 1148.401 | 15.03793 | 1148.402 | 15.03672 | 1148.401 | 14.99    | 1148.401 | 15      |
| 14.79    | 1148.401 | 15.04    | 1148.402 | 15.04    | 1148.401 | 14.99705 | 1148.401 | 15.0056 |
| 14.79382 | 1148.401 | 15.04793 | 1148.402 | 15.04672 | 1148.401 | 15       | 1148.401 | 15.01   |
| 14.8     | 1148.401 | 15.05    | 1148.402 | 15.05    | 1148.401 | 15.00705 | 1148.401 | 15.0156 |
| 14.80382 | 1148.401 | 15.05793 | 1148.402 | 15.05672 | 1148.401 | 15.01    | 1148.401 | 15.02   |
| 14.81    | 1148.401 | 15.06    | 1148.402 | 15.06    | 1148.401 | 15.01705 | 1148.401 | 15.0256 |
| 14.81382 | 1148.401 | 15.06793 | 1148.402 | 15.06672 | 1148.401 | 15.02    | 1148.401 | 15.03   |
| 14.82    | 1148.401 | 15.07    | 1148.402 | 15.07    | 1148.401 | 15.02705 | 1148.401 | 15.0356 |
| 14.82382 | 1148.401 | 15.07793 | 1148.402 | 15.07672 | 1148.401 | 15.03    | 1148.401 | 15.04   |
| 14.83    | 1148.401 | 15.08    | 1148.402 | 15.08    | 1148.401 | 15.03705 | 1148.401 | 15.0456 |
| 14.83382 | 1148.401 | 15.08793 | 1148.402 | 15.08672 | 1148.401 | 15.04    | 1148.401 | 15.05   |
| 14.84    | 1148.401 | 15.09    | 1148.402 | 15.09    | 1148.401 | 15.04705 | 1148.401 | 15.0556 |
| 14.84382 | 1148.401 | 15.09793 | 1148.402 | 15.09672 | 1148.401 | 15.05    | 1148.401 | 15.06   |
| 14.85    | 1148.401 | 15.1     | 1148.402 | 15.1     | 1148.401 | 15.05705 | 1148.401 | 15.0656 |
| 14.85382 | 1148.401 | 15.10793 | 1148.402 | 15.10672 | 1148.402 | 15.06    | 1148.401 | 15.07   |
| 14.86    | 1148.401 | 15.11    | 1148.402 | 15.11    | 1148.402 | 15.06705 | 1148.401 | 15.0756 |
| 14.86382 | 1148.401 | 15.11793 | 1148.402 | 15.11672 | 1148.402 | 15.07    | 1148.401 | 15.08   |
| 14.87    | 1148.401 | 15.12    | 1148.402 | 15.12    | 1148.402 | 15.07705 | 1148.401 | 15.0856 |

|          |          |          |          |          |          |          |          |         |
|----------|----------|----------|----------|----------|----------|----------|----------|---------|
| 14.87382 | 1148.401 | 15.12793 | 1148.402 | 15.12672 | 1148.402 | 15.08    | 1148.401 | 15.09   |
| 14.88    | 1148.401 | 15.13    | 1148.402 | 15.13    | 1148.402 | 15.08705 | 1148.401 | 15.0956 |
| 14.88382 | 1148.401 | 15.13793 | 1148.402 | 15.13672 | 1148.402 | 15.09    | 1148.401 | 15.1    |
| 14.89    | 1148.401 | 15.14    | 1148.402 | 15.14    | 1148.402 | 15.09705 | 1148.401 | 15.1056 |
| 14.89382 | 1148.401 | 15.14793 | 1148.402 | 15.14672 | 1148.402 | 15.1     | 1148.401 | 15.11   |
| 14.9     | 1148.401 | 15.15    | 1148.402 | 15.15    | 1148.402 | 15.10705 | 1148.401 | 15.1156 |
| 14.90382 | 1148.401 | 15.15793 | 1148.402 | 15.15672 | 1148.402 | 15.11    | 1148.401 | 15.12   |
| 14.91    | 1148.401 | 15.16    | 1148.402 | 15.16    | 1148.402 | 15.11705 | 1148.401 | 15.1256 |
| 14.91382 | 1148.402 | 15.16793 | 1148.402 | 15.16672 | 1148.402 | 15.12    | 1148.401 | 15.13   |
| 14.92    | 1148.402 | 15.17    | 1148.402 | 15.17    | 1148.402 | 15.12705 | 1148.401 | 15.1356 |
| 14.92382 | 1148.402 | 15.17793 | 1148.402 | 15.17672 | 1148.402 | 15.13    | 1148.401 | 15.14   |
| 14.93    | 1148.402 | 15.18    | 1148.402 | 15.18    | 1148.402 | 15.13705 | 1148.401 | 15.1456 |
| 14.93382 | 1148.402 | 15.18793 | 1148.402 | 15.18672 | 1148.402 | 15.14    | 1148.401 | 15.15   |
| 14.94    | 1148.402 | 15.19    | 1148.402 | 15.19    | 1148.402 | 15.14705 | 1148.401 | 15.1556 |
| 14.94382 | 1148.402 | 15.19793 | 1148.402 | 15.19672 | 1148.402 | 15.15    | 1148.401 | 15.16   |
| 14.95    | 1148.402 | 15.2     | 1148.402 | 15.2     | 1148.402 | 15.15705 | 1148.401 | 15.1656 |
| 14.95382 | 1148.402 | 15.20793 | 1148.402 | 15.20672 | 1148.402 | 15.16    | 1148.401 | 15.17   |
| 14.96    | 1148.402 | 15.21    | 1148.402 | 15.21    | 1148.402 | 15.16705 | 1148.401 | 15.1756 |
| 14.96382 | 1148.402 | 15.21793 | 1148.402 | 15.21672 | 1148.402 | 15.17    | 1148.401 | 15.18   |
| 14.97    | 1148.402 | 15.22    | 1148.402 | 15.22    | 1148.402 | 15.17705 | 1148.401 | 15.1856 |
| 14.97382 | 1148.402 | 15.22793 | 1148.402 | 15.22672 | 1148.402 | 15.18    | 1148.401 | 15.19   |
| 14.98    | 1148.402 | 15.23    | 1148.402 | 15.23    | 1148.402 | 15.18705 | 1148.401 | 15.1956 |
| 14.98382 | 1148.402 | 15.23793 | 1148.402 | 15.23672 | 1148.402 | 15.19    | 1148.401 | 15.2    |
| 14.99    | 1148.402 | 15.24    | 1148.402 | 15.24    | 1148.402 | 15.19705 | 1148.401 | 15.2056 |
| 14.99382 | 1148.402 | 15.24793 | 1148.402 | 15.24672 | 1148.402 | 15.2     | 1148.401 | 15.21   |
| 15       | 1148.402 | 15.25    | 1148.402 | 15.25    | 1148.402 | 15.20705 | 1148.402 | 15.2156 |
| 15.00382 | 1148.402 | 15.25793 | 1148.402 | 15.25672 | 1148.402 | 15.21    | 1148.402 | 15.22   |
| 15.01    | 1148.402 | 15.26    | 1148.402 | 15.26    | 1148.402 | 15.21705 | 1148.402 | 15.2256 |
| 15.01382 | 1148.402 | 15.26793 | 1148.402 | 15.26672 | 1148.402 | 15.22    | 1148.402 | 15.23   |
| 15.02    | 1148.402 | 15.27    | 1148.402 | 15.27    | 1148.402 | 15.22705 | 1148.402 | 15.2356 |
| 15.02382 | 1148.402 | 15.27793 | 1148.402 | 15.27672 | 1148.402 | 15.23    | 1148.402 | 15.24   |
| 15.03    | 1148.402 | 15.28    | 1148.402 | 15.28    | 1148.402 | 15.23705 | 1148.402 | 15.2456 |
| 15.03382 | 1148.402 | 15.28793 | 1148.402 | 15.28672 | 1148.402 | 15.24    | 1148.402 | 15.25   |
| 15.04    | 1148.402 | 15.29    | 1148.402 | 15.29    | 1148.402 | 15.24705 | 1148.402 | 15.2556 |
| 15.04382 | 1148.402 | 15.29793 | 1148.402 | 15.29672 | 1148.402 | 15.25    | 1148.402 | 15.26   |
| 15.05    | 1148.402 | 15.3     | 1148.402 | 15.3     | 1148.402 | 15.25705 | 1148.402 | 15.2656 |
| 15.05382 | 1148.402 | 15.30793 | 1148.402 | 15.30672 | 1148.402 | 15.26    | 1148.402 | 15.27   |
| 15.06    | 1148.402 | 15.31    | 1148.402 | 15.31    | 1148.402 | 15.26705 | 1148.402 | 15.2756 |
| 15.06382 | 1148.402 | 15.31793 | 1148.402 | 15.31672 | 1148.402 | 15.27    | 1148.402 | 15.28   |
| 15.07    | 1148.402 | 15.32    | 1148.402 | 15.32    | 1148.402 | 15.27705 | 1148.402 | 15.2856 |
| 15.07382 | 1148.402 | 15.32793 | 1148.402 | 15.32672 | 1148.402 | 15.28    | 1148.402 | 15.29   |
| 15.08    | 1148.402 | 15.33    | 1148.402 | 15.33    | 1148.402 | 15.28705 | 1148.402 | 15.2956 |
| 15.08382 | 1148.402 | 15.33793 | 1148.402 | 15.33672 | 1148.402 | 15.29    | 1148.402 | 15.3    |
| 15.09    | 1148.402 | 15.34    | 1148.402 | 15.34    | 1148.402 | 15.29705 | 1148.402 | 15.3056 |
| 15.09382 | 1148.402 | 15.34793 | 1148.402 | 15.34672 | 1148.402 | 15.3     | 1148.402 | 15.31   |
| 15.1     | 1148.402 | 15.35    | 1148.402 | 15.35    | 1148.402 | 15.30705 | 1148.402 | 15.3156 |
| 15.10382 | 1148.402 | 15.35793 | 1148.402 | 15.35672 | 1148.402 | 15.31    | 1148.402 | 15.32   |

|          |          |          |          |          |          |          |          |         |
|----------|----------|----------|----------|----------|----------|----------|----------|---------|
| 15.11    | 1148.402 | 15.36    | 1148.402 | 15.36    | 1148.402 | 15.31705 | 1148.402 | 15.3256 |
| 15.11382 | 1148.402 | 15.36793 | 1148.402 | 15.36672 | 1148.402 | 15.32    | 1148.402 | 15.33   |
| 15.12    | 1148.402 | 15.37    | 1148.402 | 15.37    | 1148.402 | 15.32705 | 1148.402 | 15.3356 |
| 15.12382 | 1148.402 | 15.37793 | 1148.402 | 15.37672 | 1148.402 | 15.33    | 1148.402 | 15.34   |
| 15.13    | 1148.402 | 15.38    | 1148.402 | 15.38    | 1148.402 | 15.33705 | 1148.402 | 15.3456 |
| 15.13382 | 1148.402 | 15.38793 | 1148.402 | 15.38672 | 1148.402 | 15.34    | 1148.402 | 15.35   |
| 15.14    | 1148.402 | 15.39    | 1148.402 | 15.39    | 1148.402 | 15.34705 | 1148.402 | 15.3556 |
| 15.14382 | 1148.402 | 15.39793 | 1148.402 | 15.39672 | 1148.402 | 15.35    | 1148.402 | 15.36   |
| 15.15    | 1148.402 | 15.4     | 1148.402 | 15.4     | 1148.402 | 15.35705 | 1148.402 | 15.3656 |
| 15.15382 | 1148.402 | 15.40793 | 1148.402 | 15.40672 | 1148.402 | 15.36    | 1148.402 | 15.37   |
| 15.16    | 1148.402 | 15.41    | 1148.402 | 15.41    | 1148.402 | 15.36705 | 1148.402 | 15.3756 |
| 15.16382 | 1148.402 | 15.41793 | 1148.402 | 15.41672 | 1148.402 | 15.37    | 1148.402 | 15.38   |
| 15.17    | 1148.402 | 15.42    | 1148.402 | 15.42    | 1148.402 | 15.37705 | 1148.402 | 15.3856 |
| 15.17382 | 1148.402 | 15.42793 | 1148.402 | 15.42672 | 1148.402 | 15.38    | 1148.402 | 15.39   |
| 15.18    | 1148.402 | 15.43    | 1148.402 | 15.43    | 1148.402 | 15.38705 | 1148.402 | 15.3956 |
| 15.18382 | 1148.402 | 15.43793 | 1148.402 | 15.43672 | 1148.402 | 15.39    | 1148.402 | 15.4    |
| 15.19    | 1148.402 | 15.44    | 1148.402 | 15.44    | 1148.402 | 15.39705 | 1148.402 | 15.4056 |
| 15.19382 | 1148.402 | 15.44793 | 1148.402 | 15.44672 | 1148.402 | 15.4     | 1148.402 | 15.41   |
| 15.2     | 1148.402 | 15.45    | 1148.402 | 15.45    | 1148.402 | 15.40705 | 1148.402 | 15.4156 |
| 15.20382 | 1148.402 | 15.45793 | 1148.402 | 15.45672 | 1148.402 | 15.41    | 1148.402 | 15.42   |
| 15.21    | 1148.402 | 15.46    | 1148.402 | 15.46    | 1148.402 | 15.41705 | 1148.402 | 15.4256 |
| 15.21382 | 1148.402 | 15.46793 | 1148.402 | 15.46672 | 1148.402 | 15.42    | 1148.402 | 15.43   |
| 15.22    | 1148.402 | 15.47    | 1148.402 | 15.47    | 1148.402 | 15.42705 | 1148.402 | 15.4356 |
| 15.22382 | 1148.402 | 15.47793 | 1148.402 | 15.47672 | 1148.402 | 15.43    | 1148.402 | 15.44   |
| 15.23    | 1148.402 | 15.48    | 1148.402 | 15.48    | 1148.402 | 15.43705 | 1148.402 | 15.4456 |
| 15.23382 | 1148.402 | 15.48793 | 1148.402 | 15.48672 | 1148.402 | 15.44    | 1148.402 | 15.45   |
| 15.24    | 1148.402 | 15.49    | 1148.402 | 15.49    | 1148.402 | 15.44705 | 1148.402 | 15.4556 |
| 15.24382 | 1148.402 | 15.49793 | 1148.402 | 15.49672 | 1148.402 | 15.45    | 1148.402 | 15.46   |
| 15.25    | 1148.402 | 15.5     | 1148.402 | 15.5     | 1148.402 | 15.45705 | 1148.402 | 15.4656 |
| 15.25382 | 1148.402 | 15.50793 | 1148.402 | 15.50672 | 1148.402 | 15.46    | 1148.402 | 15.47   |
| 15.26    | 1148.402 | 15.51    | 1148.402 | 15.51    | 1148.402 | 15.46705 | 1148.402 | 15.4756 |
| 15.26382 | 1148.402 | 15.51793 | 1148.402 | 15.51672 | 1148.402 | 15.47    | 1148.402 | 15.48   |
| 15.27    | 1148.402 | 15.52    | 1148.402 | 15.52    | 1148.402 | 15.47705 | 1148.402 | 15.4856 |
| 15.27382 | 1148.402 | 15.52793 | 1148.402 | 15.52672 | 1148.402 | 15.48    | 1148.402 | 15.49   |
| 15.28    | 1148.402 | 15.53    | 1148.402 | 15.53    | 1148.402 | 15.48705 | 1148.402 | 15.4956 |
| 15.28382 | 1148.402 | 15.53793 | 1148.402 | 15.53672 | 1148.402 | 15.49    | 1148.402 | 15.5    |
| 15.29    | 1148.402 | 15.54    | 1148.402 | 15.54    | 1148.402 | 15.49705 | 1148.402 | 15.5056 |
| 15.29382 | 1148.402 | 15.54793 | 1148.402 | 15.54672 | 1148.402 | 15.5     | 1148.402 | 15.51   |
| 15.3     | 1148.402 | 15.55    | 1148.402 | 15.55    | 1148.402 | 15.50705 | 1148.402 | 15.5156 |
| 15.30382 | 1148.402 | 15.55793 | 1148.402 | 15.55672 | 1148.402 | 15.51    | 1148.402 | 15.52   |
| 15.31    | 1148.402 | 15.56    | 1148.402 | 15.56    | 1148.402 | 15.51705 | 1148.402 | 15.5256 |
| 15.31382 | 1148.402 | 15.56793 | 1148.402 | 15.56672 | 1148.402 | 15.52    | 1148.402 | 15.53   |
| 15.32    | 1148.402 | 15.57    | 1148.402 | 15.57    | 1148.402 | 15.52705 | 1148.402 | 15.5356 |
| 15.32382 | 1148.402 | 15.57793 | 1148.402 | 15.57672 | 1148.402 | 15.53    | 1148.402 | 15.54   |
| 15.33    | 1148.402 | 15.58    | 1148.402 | 15.58    | 1148.402 | 15.53705 | 1148.402 | 15.5456 |
| 15.33382 | 1148.402 | 15.58793 | 1148.402 | 15.58672 | 1148.402 | 15.54    | 1148.402 | 15.55   |
| 15.34    | 1148.402 | 15.59    | 1148.402 | 15.59    | 1148.402 | 15.54705 | 1148.402 | 15.5556 |



|          |          |          |          |          |          |          |          |         |
|----------|----------|----------|----------|----------|----------|----------|----------|---------|
| 15.34382 | 1148.402 | 15.59793 | 1148.402 | 15.59672 | 1148.402 | 15.55    | 1148.402 | 15.56   |
| 15.35    | 1148.402 | 15.6     | 1148.402 | 15.6     | 1148.402 | 15.55705 | 1148.402 | 15.5656 |
| 15.35382 | 1148.402 | 15.60793 | 1148.403 | 15.60672 | 1148.402 | 15.56    | 1148.402 | 15.57   |
| 15.36    | 1148.402 | 15.61    | 1148.403 | 15.61    | 1148.402 | 15.56705 | 1148.402 | 15.5756 |
| 15.36382 | 1148.402 | 15.61793 | 1148.403 | 15.61672 | 1148.402 | 15.57    | 1148.402 | 15.58   |
| 15.37    | 1148.402 | 15.62    | 1148.403 | 15.62    | 1148.402 | 15.57705 | 1148.402 | 15.5856 |
| 15.37382 | 1148.402 | 15.62793 | 1148.403 | 15.62672 | 1148.402 | 15.58    | 1148.402 | 15.59   |
| 15.38    | 1148.402 | 15.63    | 1148.403 | 15.63    | 1148.402 | 15.58705 | 1148.402 | 15.5956 |
| 15.38382 | 1148.402 | 15.63793 | 1148.403 | 15.63672 | 1148.402 | 15.59    | 1148.402 | 15.6    |
| 15.39    | 1148.402 | 15.64    | 1148.403 | 15.64    | 1148.402 | 15.59705 | 1148.402 | 15.6056 |
| 15.39382 | 1148.402 | 15.64793 | 1148.403 | 15.64672 | 1148.402 | 15.6     | 1148.402 | 15.61   |
| 15.4     | 1148.402 | 15.65    | 1148.403 | 15.65    | 1148.402 | 15.60705 | 1148.402 | 15.6156 |
| 15.40382 | 1148.402 | 15.65793 | 1148.403 | 15.65672 | 1148.402 | 15.61    | 1148.402 | 15.62   |
| 15.41    | 1148.402 | 15.66    | 1148.403 | 15.66    | 1148.402 | 15.61705 | 1148.402 | 15.6256 |
| 15.41382 | 1148.402 | 15.66793 | 1148.403 | 15.66672 | 1148.402 | 15.62    | 1148.402 | 15.63   |
| 15.42    | 1148.402 | 15.67    | 1148.403 | 15.67    | 1148.402 | 15.62705 | 1148.402 | 15.6356 |
| 15.42382 | 1148.402 | 15.67793 | 1148.403 | 15.67672 | 1148.402 | 15.63    | 1148.402 | 15.64   |
| 15.43    | 1148.402 | 15.68    | 1148.403 | 15.68    | 1148.402 | 15.63705 | 1148.402 | 15.6456 |
| 15.43382 | 1148.402 | 15.68793 | 1148.403 | 15.68672 | 1148.402 | 15.64    | 1148.402 | 15.65   |
| 15.44    | 1148.402 | 15.69    | 1148.403 | 15.69    | 1148.402 | 15.64705 | 1148.402 | 15.6556 |
| 15.44382 | 1148.402 | 15.69793 | 1148.403 | 15.69672 | 1148.402 | 15.65    | 1148.402 | 15.66   |
| 15.45    | 1148.402 | 15.7     | 1148.403 | 15.7     | 1148.402 | 15.65705 | 1148.402 | 15.6656 |
| 15.45382 | 1148.402 | 15.70793 | 1148.403 | 15.70672 | 1148.403 | 15.66    | 1148.402 | 15.67   |
| 15.46    | 1148.402 | 15.71    | 1148.403 | 15.71    | 1148.403 | 15.66705 | 1148.402 | 15.6756 |
| 15.46382 | 1148.402 | 15.71793 | 1148.403 | 15.71672 | 1148.403 | 15.67    | 1148.402 | 15.68   |
| 15.47    | 1148.402 | 15.72    | 1148.403 | 15.72    | 1148.403 | 15.67705 | 1148.402 | 15.6856 |
| 15.47382 | 1148.402 | 15.72793 | 1148.403 | 15.72672 | 1148.403 | 15.68    | 1148.402 | 15.69   |
| 15.48    | 1148.402 | 15.73    | 1148.403 | 15.73    | 1148.403 | 15.68705 | 1148.402 | 15.6956 |
| 15.48382 | 1148.402 | 15.73793 | 1148.403 | 15.73672 | 1148.403 | 15.69    | 1148.402 | 15.7    |
| 15.49    | 1148.402 | 15.74    | 1148.403 | 15.74    | 1148.403 | 15.69705 | 1148.402 | 15.7056 |
| 15.49382 | 1148.402 | 15.74793 | 1148.403 | 15.74672 | 1148.403 | 15.7     | 1148.402 | 15.71   |
| 15.5     | 1148.402 | 15.75    | 1148.403 | 15.75    | 1148.403 | 15.70705 | 1148.402 | 15.7156 |
| 15.50382 | 1148.402 | 15.75793 | 1148.403 | 15.75672 | 1148.403 | 15.71    | 1148.402 | 15.72   |
| 15.51    | 1148.402 | 15.76    | 1148.403 | 15.76    | 1148.403 | 15.71705 | 1148.402 | 15.7256 |
| 15.51382 | 1148.402 | 15.76793 | 1148.403 | 15.76672 | 1148.403 | 15.72    | 1148.402 | 15.73   |
| 15.52    | 1148.403 | 15.77    | 1148.403 | 15.77    | 1148.403 | 15.72705 | 1148.402 | 15.7356 |
| 15.52382 | 1148.403 | 15.77793 | 1148.403 | 15.77672 | 1148.403 | 15.73    | 1148.402 | 15.74   |
| 15.53    | 1148.403 | 15.78    | 1148.403 | 15.78    | 1148.403 | 15.73705 | 1148.402 | 15.7456 |
| 15.53382 | 1148.403 | 15.78793 | 1148.403 | 15.78672 | 1148.403 | 15.74    | 1148.402 | 15.75   |
| 15.54    | 1148.403 | 15.79    | 1148.403 | 15.79    | 1148.403 | 15.74705 | 1148.402 | 15.7556 |
| 15.54382 | 1148.403 | 15.79793 | 1148.403 | 15.79672 | 1148.403 | 15.75    | 1148.402 | 15.76   |
| 15.55    | 1148.403 | 15.8     | 1148.403 | 15.8     | 1148.403 | 15.75705 | 1148.402 | 15.7656 |
| 15.55382 | 1148.403 | 15.80793 | 1148.403 | 15.80672 | 1148.403 | 15.76    | 1148.402 | 15.77   |
| 15.56    | 1148.403 | 15.81    | 1148.403 | 15.81    | 1148.403 | 15.76705 | 1148.402 | 15.7756 |
| 15.56382 | 1148.403 | 15.81793 | 1148.403 | 15.81672 | 1148.403 | 15.77    | 1148.402 | 15.78   |
| 15.57    | 1148.403 | 15.82    | 1148.403 | 15.82    | 1148.403 | 15.77705 | 1148.402 | 15.7856 |
| 15.57382 | 1148.403 | 15.82793 | 1148.403 | 15.82672 | 1148.403 | 15.78    | 1148.402 | 15.79   |

|          |          |          |          |          |          |          |          |         |
|----------|----------|----------|----------|----------|----------|----------|----------|---------|
| 15.58    | 1148.403 | 15.83    | 1148.403 | 15.83    | 1148.403 | 15.78705 | 1148.402 | 15.7956 |
| 15.58382 | 1148.403 | 15.83793 | 1148.403 | 15.83672 | 1148.403 | 15.79    | 1148.402 | 15.8    |
| 15.59    | 1148.403 | 15.84    | 1148.403 | 15.84    | 1148.403 | 15.79705 | 1148.402 | 15.8056 |
| 15.59382 | 1148.403 | 15.84793 | 1148.403 | 15.84672 | 1148.403 | 15.8     | 1148.402 | 15.81   |
| 15.6     | 1148.403 | 15.85    | 1148.403 | 15.85    | 1148.403 | 15.80705 | 1148.403 | 15.8156 |
| 15.60382 | 1148.403 | 15.85793 | 1148.403 | 15.85672 | 1148.403 | 15.81    | 1148.403 | 15.82   |
| 15.61    | 1148.403 | 15.86    | 1148.403 | 15.86    | 1148.403 | 15.81705 | 1148.403 | 15.8256 |
| 15.61382 | 1148.403 | 15.86793 | 1148.403 | 15.86672 | 1148.403 | 15.82    | 1148.403 | 15.83   |
| 15.62    | 1148.403 | 15.87    | 1148.403 | 15.87    | 1148.403 | 15.82705 | 1148.403 | 15.8356 |
| 15.62382 | 1148.403 | 15.87793 | 1148.403 | 15.87672 | 1148.403 | 15.83    | 1148.403 | 15.84   |
| 15.63    | 1148.403 | 15.88    | 1148.403 | 15.88    | 1148.403 | 15.83705 | 1148.403 | 15.8456 |
| 15.63382 | 1148.403 | 15.88793 | 1148.403 | 15.88672 | 1148.403 | 15.84    | 1148.403 | 15.85   |
| 15.64    | 1148.403 | 15.89    | 1148.403 | 15.89    | 1148.403 | 15.84705 | 1148.403 | 15.8556 |
| 15.64382 | 1148.403 | 15.89793 | 1148.403 | 15.89672 | 1148.403 | 15.85    | 1148.403 | 15.86   |
| 15.65    | 1148.403 | 15.9     | 1148.403 | 15.9     | 1148.403 | 15.85705 | 1148.403 | 15.8656 |
| 15.65382 | 1148.403 | 15.90793 | 1148.403 | 15.90672 | 1148.403 | 15.86    | 1148.403 | 15.87   |
| 15.66    | 1148.403 | 15.91    | 1148.403 | 15.91    | 1148.403 | 15.86705 | 1148.403 | 15.8756 |
| 15.66382 | 1148.403 | 15.91793 | 1148.403 | 15.91672 | 1148.403 | 15.87    | 1148.403 | 15.88   |
| 15.67    | 1148.403 | 15.92    | 1148.403 | 15.92    | 1148.403 | 15.87705 | 1148.403 | 15.8856 |
| 15.67382 | 1148.403 | 15.92793 | 1148.403 | 15.92672 | 1148.403 | 15.88    | 1148.403 | 15.89   |
| 15.68    | 1148.403 | 15.93    | 1148.403 | 15.93    | 1148.403 | 15.88705 | 1148.403 | 15.8956 |
| 15.68382 | 1148.403 | 15.93793 | 1148.403 | 15.93672 | 1148.403 | 15.89    | 1148.403 | 15.9    |
| 15.69    | 1148.403 | 15.94    | 1148.403 | 15.94    | 1148.403 | 15.89705 | 1148.403 | 15.9056 |
| 15.69382 | 1148.403 | 15.94793 | 1148.403 | 15.94672 | 1148.403 | 15.9     | 1148.403 | 15.91   |
| 15.7     | 1148.403 | 15.95    | 1148.403 | 15.95    | 1148.403 | 15.90705 | 1148.403 | 15.9156 |
| 15.70382 | 1148.403 | 15.95793 | 1148.403 | 15.95672 | 1148.403 | 15.91    | 1148.403 | 15.92   |
| 15.71    | 1148.403 | 15.96    | 1148.403 | 15.96    | 1148.403 | 15.91705 | 1148.403 | 15.9256 |
| 15.71382 | 1148.403 | 15.96793 | 1148.403 | 15.96672 | 1148.403 | 15.92    | 1148.403 | 15.93   |
| 15.72    | 1148.403 | 15.97    | 1148.403 | 15.97    | 1148.403 | 15.92705 | 1148.403 | 15.9356 |
| 15.72382 | 1148.403 | 15.97793 | 1148.403 | 15.97672 | 1148.403 | 15.93    | 1148.403 | 15.94   |
| 15.73    | 1148.403 | 15.98    | 1148.403 | 15.98    | 1148.403 | 15.93705 | 1148.403 | 15.9456 |
| 15.73382 | 1148.403 | 15.98793 | 1148.403 | 15.98672 | 1148.403 | 15.94    | 1148.403 | 15.95   |
| 15.74    | 1148.403 | 15.99    | 1148.403 | 15.99    | 1148.403 | 15.94705 | 1148.403 | 15.9556 |
| 15.74382 | 1148.403 | 15.99793 | 1148.403 | 15.99672 | 1148.403 | 15.95    | 1148.403 | 15.96   |
| 15.75    | 1148.403 | 16       | 1148.403 | 16       | 1148.403 | 15.95705 | 1148.403 | 15.9656 |
| 15.75382 | 1148.403 | 16.00793 | 1148.403 | 16.00672 | 1148.403 | 15.96    | 1148.403 | 15.97   |
| 15.76    | 1148.403 | 16.01    | 1148.403 | 16.01    | 1148.403 | 15.96705 | 1148.403 | 15.9756 |
| 15.76382 | 1148.403 | 16.01793 | 1148.403 | 16.01672 | 1148.403 | 15.97    | 1148.403 | 15.98   |
| 15.77    | 1148.403 | 16.02    | 1148.403 | 16.02    | 1148.403 | 15.97705 | 1148.403 | 15.9856 |
| 15.77382 | 1148.403 | 16.02793 | 1148.403 | 16.02672 | 1148.403 | 15.98    | 1148.403 | 15.99   |
| 15.78    | 1148.403 | 16.03    | 1148.403 | 16.03    | 1148.403 | 15.98705 | 1148.403 | 15.9956 |
| 15.78382 | 1148.403 | 16.03793 | 1148.403 | 16.03672 | 1148.403 | 15.99    | 1148.403 | 16      |
| 15.79    | 1148.403 | 16.04    | 1148.403 | 16.04    | 1148.403 | 15.99705 | 1148.403 | 16.0056 |
| 15.79382 | 1148.403 | 16.04793 | 1148.403 | 16.04672 | 1148.403 | 16       | 1148.403 | 16.01   |
| 15.8     | 1148.403 | 16.05    | 1148.403 | 16.05    | 1148.403 | 16.00705 | 1148.403 | 16.0156 |
| 15.80382 | 1148.403 | 16.05793 | 1148.403 | 16.05672 | 1148.403 | 16.01    | 1148.403 | 16.02   |
| 15.81    | 1148.403 | 16.06    | 1148.403 | 16.06    | 1148.403 | 16.01705 | 1148.403 | 16.0256 |

|          |          |          |          |          |          |          |          |         |
|----------|----------|----------|----------|----------|----------|----------|----------|---------|
| 15.81382 | 1148.403 | 16.06793 | 1148.403 | 16.06672 | 1148.403 | 16.02    | 1148.403 | 16.03   |
| 15.82    | 1148.403 | 16.07    | 1148.403 | 16.07    | 1148.403 | 16.02705 | 1148.403 | 16.0356 |
| 15.82382 | 1148.403 | 16.07793 | 1148.403 | 16.07672 | 1148.403 | 16.03    | 1148.403 | 16.04   |
| 15.83    | 1148.403 | 16.08    | 1148.403 | 16.08    | 1148.403 | 16.03705 | 1148.403 | 16.0456 |
| 15.83382 | 1148.403 | 16.08793 | 1148.403 | 16.08672 | 1148.403 | 16.04    | 1148.403 | 16.05   |
| 15.84    | 1148.403 | 16.09    | 1148.403 | 16.09    | 1148.403 | 16.04705 | 1148.403 | 16.0556 |
| 15.84382 | 1148.403 | 16.09793 | 1148.403 | 16.09672 | 1148.403 | 16.05    | 1148.403 | 16.06   |
| 15.85    | 1148.403 | 16.1     | 1148.403 | 16.1     | 1148.403 | 16.05705 | 1148.403 | 16.0656 |
| 15.85382 | 1148.403 | 16.10793 | 1148.403 | 16.10672 | 1148.403 | 16.06    | 1148.403 | 16.07   |
| 15.86    | 1148.403 | 16.11    | 1148.403 | 16.11    | 1148.403 | 16.06705 | 1148.403 | 16.0756 |
| 15.86382 | 1148.403 | 16.11793 | 1148.403 | 16.11672 | 1148.403 | 16.07    | 1148.403 | 16.08   |
| 15.87    | 1148.403 | 16.12    | 1148.403 | 16.12    | 1148.403 | 16.07705 | 1148.403 | 16.0856 |
| 15.87382 | 1148.403 | 16.12793 | 1148.403 | 16.12672 | 1148.403 | 16.08    | 1148.403 | 16.09   |
| 15.88    | 1148.403 | 16.13    | 1148.403 | 16.13    | 1148.403 | 16.08705 | 1148.403 | 16.0956 |
| 15.88382 | 1148.403 | 16.13793 | 1148.403 | 16.13672 | 1148.403 | 16.09    | 1148.403 | 16.1    |
| 15.89    | 1148.403 | 16.14    | 1148.403 | 16.14    | 1148.403 | 16.09705 | 1148.403 | 16.1056 |
| 15.89382 | 1148.403 | 16.14793 | 1148.403 | 16.14672 | 1148.403 | 16.1     | 1148.403 | 16.11   |
| 15.9     | 1148.403 | 16.15    | 1148.403 | 16.15    | 1148.403 | 16.10705 | 1148.403 | 16.1156 |
| 15.90382 | 1148.403 | 16.15793 | 1148.403 | 16.15672 | 1148.403 | 16.11    | 1148.403 | 16.12   |
| 15.91    | 1148.403 | 16.16    | 1148.403 | 16.16    | 1148.403 | 16.11705 | 1148.403 | 16.1256 |
| 15.91382 | 1148.403 | 16.16793 | 1148.403 | 16.16672 | 1148.403 | 16.12    | 1148.403 | 16.13   |
| 15.92    | 1148.403 | 16.17    | 1148.403 | 16.17    | 1148.403 | 16.12705 | 1148.403 | 16.1356 |
| 15.92382 | 1148.403 | 16.17793 | 1148.403 | 16.17672 | 1148.403 | 16.13    | 1148.403 | 16.14   |
| 15.93    | 1148.403 | 16.18    | 1148.403 | 16.18    | 1148.403 | 16.13705 | 1148.403 | 16.1456 |
| 15.93382 | 1148.403 | 16.18793 | 1148.403 | 16.18672 | 1148.403 | 16.14    | 1148.403 | 16.15   |
| 15.94    | 1148.403 | 16.19    | 1148.403 | 16.19    | 1148.403 | 16.14705 | 1148.403 | 16.1556 |
| 15.94382 | 1148.403 | 16.19793 | 1148.403 | 16.19672 | 1148.403 | 16.15    | 1148.403 | 16.16   |
| 15.95    | 1148.403 | 16.2     | 1148.403 | 16.2     | 1148.403 | 16.15705 | 1148.403 | 16.1656 |
| 15.95382 | 1148.403 | 16.20793 | 1148.403 | 16.20672 | 1148.403 | 16.16    | 1148.403 | 16.17   |
| 15.96    | 1148.403 | 16.21    | 1148.403 | 16.21    | 1148.403 | 16.16705 | 1148.403 | 16.1756 |
| 15.96382 | 1148.403 | 16.21793 | 1148.403 | 16.21672 | 1148.403 | 16.17    | 1148.403 | 16.18   |
| 15.97    | 1148.403 | 16.22    | 1148.403 | 16.22    | 1148.403 | 16.17705 | 1148.403 | 16.1856 |
| 15.97382 | 1148.403 | 16.22793 | 1148.403 | 16.22672 | 1148.403 | 16.18    | 1148.403 | 16.19   |
| 15.98    | 1148.403 | 16.23    | 1148.403 | 16.23    | 1148.403 | 16.18705 | 1148.403 | 16.1956 |
| 15.98382 | 1148.403 | 16.23793 | 1148.403 | 16.23672 | 1148.403 | 16.19    | 1148.403 | 16.2    |
| 15.99    | 1148.403 | 16.24    | 1148.403 | 16.24    | 1148.403 | 16.19705 | 1148.403 | 16.2056 |
| 15.99382 | 1148.403 | 16.24793 | 1148.403 | 16.24672 | 1148.403 | 16.2     | 1148.403 | 16.21   |
| 16       | 1148.403 | 16.25    | 1148.403 | 16.25    | 1148.403 | 16.20705 | 1148.403 | 16.2156 |
| 16.00382 | 1148.403 | 16.25793 | 1148.403 | 16.25672 | 1148.403 | 16.21    | 1148.403 | 16.22   |
| 16.01    | 1148.403 | 16.26    | 1148.403 | 16.26    | 1148.403 | 16.21705 | 1148.403 | 16.2256 |
| 16.01382 | 1148.403 | 16.26793 | 1148.403 | 16.26672 | 1148.403 | 16.22    | 1148.403 | 16.23   |
| 16.02    | 1148.403 | 16.27    | 1148.403 | 16.27    | 1148.403 | 16.22705 | 1148.403 | 16.2356 |
| 16.02382 | 1148.403 | 16.27793 | 1148.403 | 16.27672 | 1148.403 | 16.23    | 1148.403 | 16.24   |
| 16.03    | 1148.403 | 16.28    | 1148.403 | 16.28    | 1148.403 | 16.23705 | 1148.403 | 16.2456 |
| 16.03382 | 1148.403 | 16.28793 | 1148.403 | 16.28672 | 1148.403 | 16.24    | 1148.403 | 16.25   |
| 16.04    | 1148.403 | 16.29    | 1148.403 | 16.29    | 1148.403 | 16.24705 | 1148.403 | 16.2556 |
| 16.04382 | 1148.403 | 16.29793 | 1148.403 | 16.29672 | 1148.403 | 16.25    | 1148.403 | 16.26   |

|          |          |          |          |          |          |          |          |         |
|----------|----------|----------|----------|----------|----------|----------|----------|---------|
| 16.05    | 1148.403 | 16.3     | 1148.403 | 16.3     | 1148.403 | 16.25705 | 1148.403 | 16.2656 |
| 16.05382 | 1148.403 | 16.30793 | 1148.403 | 16.30672 | 1148.403 | 16.26    | 1148.403 | 16.27   |
| 16.06    | 1148.403 | 16.31    | 1148.403 | 16.31    | 1148.403 | 16.26705 | 1148.403 | 16.2756 |
| 16.06382 | 1148.403 | 16.31793 | 1148.403 | 16.31672 | 1148.403 | 16.27    | 1148.403 | 16.28   |
| 16.07    | 1148.403 | 16.32    | 1148.403 | 16.32    | 1148.403 | 16.27705 | 1148.403 | 16.2856 |
| 16.07382 | 1148.403 | 16.32793 | 1148.403 | 16.32672 | 1148.403 | 16.28    | 1148.403 | 16.29   |
| 16.08    | 1148.403 | 16.33    | 1148.403 | 16.33    | 1148.403 | 16.28705 | 1148.403 | 16.2956 |
| 16.08382 | 1148.403 | 16.33793 | 1148.403 | 16.33672 | 1148.403 | 16.29    | 1148.403 | 16.3    |
| 16.09    | 1148.403 | 16.34    | 1148.403 | 16.34    | 1148.403 | 16.29705 | 1148.403 | 16.3056 |
| 16.09382 | 1148.403 | 16.34793 | 1148.403 | 16.34672 | 1148.403 | 16.3     | 1148.403 | 16.31   |
| 16.1     | 1148.403 | 16.35    | 1148.403 | 16.35    | 1148.403 | 16.30705 | 1148.403 | 16.3156 |
| 16.10382 | 1148.403 | 16.35793 | 1148.403 | 16.35672 | 1148.403 | 16.31    | 1148.403 | 16.32   |
| 16.11    | 1148.403 | 16.36    | 1148.403 | 16.36    | 1148.403 | 16.31705 | 1148.403 | 16.3256 |
| 16.11382 | 1148.403 | 16.36793 | 1148.403 | 16.36672 | 1148.403 | 16.32    | 1148.403 | 16.33   |
| 16.12    | 1148.403 | 16.37    | 1148.403 | 16.37    | 1148.403 | 16.32705 | 1148.403 | 16.3356 |
| 16.12382 | 1148.403 | 16.37793 | 1148.403 | 16.37672 | 1148.403 | 16.33    | 1148.403 | 16.34   |
| 16.13    | 1148.403 | 16.38    | 1148.403 | 16.38    | 1148.403 | 16.33705 | 1148.403 | 16.3456 |
| 16.13382 | 1148.403 | 16.38793 | 1148.403 | 16.38672 | 1148.403 | 16.34    | 1148.403 | 16.35   |
| 16.14    | 1148.403 | 16.39    | 1148.403 | 16.39    | 1148.403 | 16.34705 | 1148.403 | 16.3556 |
| 16.14382 | 1148.403 | 16.39793 | 1148.403 | 16.39672 | 1148.403 | 16.35    | 1148.403 | 16.36   |
| 16.15    | 1148.403 | 16.4     | 1148.403 | 16.4     | 1148.403 | 16.35705 | 1148.403 | 16.3656 |
| 16.15382 | 1148.403 | 16.40793 | 1148.403 | 16.40672 | 1148.403 | 16.36    | 1148.403 | 16.37   |
| 16.16    | 1148.403 | 16.41    | 1148.403 | 16.41    | 1148.403 | 16.36705 | 1148.403 | 16.3756 |
| 16.16382 | 1148.403 | 16.41793 | 1148.403 | 16.41672 | 1148.403 | 16.37    | 1148.403 | 16.38   |
| 16.17    | 1148.403 | 16.42    | 1148.403 | 16.42    | 1148.403 | 16.37705 | 1148.403 | 16.3856 |
| 16.17382 | 1148.403 | 16.42793 | 1148.403 | 16.42672 | 1148.403 | 16.38    | 1148.403 | 16.39   |
| 16.18    | 1148.403 | 16.43    | 1148.403 | 16.43    | 1148.403 | 16.38705 | 1148.403 | 16.3956 |
| 16.18382 | 1148.403 | 16.43793 | 1148.403 | 16.43672 | 1148.403 | 16.39    | 1148.403 | 16.4    |
| 16.19    | 1148.403 | 16.44    | 1148.403 | 16.44    | 1148.403 | 16.39705 | 1148.403 | 16.4056 |
| 16.19382 | 1148.403 | 16.44793 | 1148.403 | 16.44672 | 1148.403 | 16.4     | 1148.403 | 16.41   |
| 16.2     | 1148.403 | 16.45    | 1148.403 | 16.45    | 1148.403 | 16.40705 | 1148.403 | 16.4156 |
| 16.20382 | 1148.403 | 16.45793 | 1148.403 | 16.45672 | 1148.403 | 16.41    | 1148.403 | 16.42   |
| 16.21    | 1148.403 | 16.46    | 1148.403 | 16.46    | 1148.403 | 16.41705 | 1148.403 | 16.4256 |
| 16.21382 | 1148.403 | 16.46793 | 1148.403 | 16.46672 | 1148.403 | 16.42    | 1148.403 | 16.43   |
| 16.22    | 1148.403 | 16.47    | 1148.403 | 16.47    | 1148.403 | 16.42705 | 1148.403 | 16.4356 |
| 16.22382 | 1148.403 | 16.47793 | 1148.403 | 16.47672 | 1148.403 | 16.43    | 1148.403 | 16.44   |
| 16.23    | 1148.403 | 16.48    | 1148.403 | 16.48    | 1148.403 | 16.43705 | 1148.403 | 16.4456 |
| 16.23382 | 1148.403 | 16.48793 | 1148.403 | 16.48672 | 1148.403 | 16.44    | 1148.403 | 16.45   |
| 16.24    | 1148.403 | 16.49    | 1148.403 | 16.49    | 1148.403 | 16.44705 | 1148.403 | 16.4556 |
| 16.24382 | 1148.403 | 16.49793 | 1148.403 | 16.49672 | 1148.403 | 16.45    | 1148.403 | 16.46   |
| 16.25    | 1148.403 | 16.5     | 1148.403 | 16.5     | 1148.403 | 16.45705 | 1148.403 | 16.4656 |
| 16.25382 | 1148.403 | 16.50793 | 1148.403 | 16.50672 | 1148.403 | 16.46    | 1148.403 | 16.47   |
| 16.26    | 1148.403 | 16.51    | 1148.403 | 16.51    | 1148.403 | 16.46705 | 1148.403 | 16.4756 |
| 16.26382 | 1148.403 | 16.51793 | 1148.403 | 16.51672 | 1148.403 | 16.47    | 1148.403 | 16.48   |
| 16.27    | 1148.403 | 16.52    | 1148.403 | 16.52    | 1148.403 | 16.47705 | 1148.403 | 16.4856 |
| 16.27382 | 1148.403 | 16.52793 | 1148.403 | 16.52672 | 1148.403 | 16.48    | 1148.403 | 16.49   |
| 16.28    | 1148.403 | 16.53    | 1148.403 | 16.53    | 1148.403 | 16.48705 | 1148.403 | 16.4956 |

|          |          |          |          |          |          |          |          |         |
|----------|----------|----------|----------|----------|----------|----------|----------|---------|
| 16.28382 | 1148.403 | 16.53793 | 1148.403 | 16.53672 | 1148.403 | 16.49    | 1148.403 | 16.5    |
| 16.29    | 1148.403 | 16.54    | 1148.403 | 16.54    | 1148.403 | 16.49705 | 1148.403 | 16.5056 |
| 16.29382 | 1148.403 | 16.54793 | 1148.403 | 16.54672 | 1148.403 | 16.5     | 1148.403 | 16.51   |
| 16.3     | 1148.403 | 16.55    | 1148.403 | 16.55    | 1148.403 | 16.50705 | 1148.403 | 16.5156 |
| 16.30382 | 1148.403 | 16.55793 | 1148.403 | 16.55672 | 1148.403 | 16.51    | 1148.403 | 16.52   |
| 16.31    | 1148.403 | 16.56    | 1148.403 | 16.56    | 1148.403 | 16.51705 | 1148.403 | 16.5256 |
| 16.31382 | 1148.403 | 16.56793 | 1148.403 | 16.56672 | 1148.403 | 16.52    | 1148.403 | 16.53   |
| 16.32    | 1148.403 | 16.57    | 1148.403 | 16.57    | 1148.403 | 16.52705 | 1148.403 | 16.5356 |
| 16.32382 | 1148.403 | 16.57793 | 1148.403 | 16.57672 | 1148.403 | 16.53    | 1148.403 | 16.54   |
| 16.33    | 1148.403 | 16.58    | 1148.403 | 16.58    | 1148.403 | 16.53705 | 1148.403 | 16.5456 |
| 16.33382 | 1148.403 | 16.58793 | 1148.403 | 16.58672 | 1148.403 | 16.54    | 1148.403 | 16.55   |
| 16.34    | 1148.403 | 16.59    | 1148.403 | 16.59    | 1148.403 | 16.54705 | 1148.403 | 16.5556 |
| 16.34382 | 1148.403 | 16.59793 | 1148.403 | 16.59672 | 1148.403 | 16.55    | 1148.403 | 16.56   |
| 16.35    | 1148.403 | 16.6     | 1148.403 | 16.6     | 1148.403 | 16.55705 | 1148.403 | 16.5656 |
| 16.35382 | 1148.403 | 16.60793 | 1148.403 | 16.60672 | 1148.403 | 16.56    | 1148.403 | 16.57   |
| 16.36    | 1148.403 | 16.61    | 1148.403 | 16.61    | 1148.403 | 16.56705 | 1148.403 | 16.5756 |
| 16.36382 | 1148.403 | 16.61793 | 1148.403 | 16.61672 | 1148.403 | 16.57    | 1148.403 | 16.58   |
| 16.37    | 1148.403 | 16.62    | 1148.403 | 16.62    | 1148.403 | 16.57705 | 1148.403 | 16.5856 |
| 16.37382 | 1148.403 | 16.62793 | 1148.403 | 16.62672 | 1148.403 | 16.58    | 1148.403 | 16.59   |
| 16.38    | 1148.403 | 16.63    | 1148.403 | 16.63    | 1148.403 | 16.58705 | 1148.403 | 16.5956 |
| 16.38382 | 1148.403 | 16.63793 | 1148.403 | 16.63672 | 1148.403 | 16.59    | 1148.403 | 16.6    |
| 16.39    | 1148.403 | 16.64    | 1148.403 | 16.64    | 1148.403 | 16.59705 | 1148.403 | 16.6056 |
| 16.39382 | 1148.403 | 16.64793 | 1148.403 | 16.64672 | 1148.403 | 16.6     | 1148.403 | 16.61   |
| 16.4     | 1148.403 | 16.65    | 1148.403 | 16.65    | 1148.403 | 16.60705 | 1148.403 | 16.6156 |
| 16.40382 | 1148.403 | 16.65793 | 1148.403 | 16.65672 | 1148.403 | 16.61    | 1148.403 | 16.62   |
| 16.41    | 1148.403 | 16.66    | 1148.403 | 16.66    | 1148.403 | 16.61705 | 1148.403 | 16.6256 |
| 16.41382 | 1148.403 | 16.66793 | 1148.403 | 16.66672 | 1148.403 | 16.62    | 1148.403 | 16.63   |
| 16.42    | 1148.403 | 16.67    | 1148.403 | 16.67    | 1148.403 | 16.62705 | 1148.403 | 16.6356 |
| 16.42382 | 1148.403 | 16.67793 | 1148.403 | 16.67672 | 1148.403 | 16.63    | 1148.403 | 16.64   |
| 16.43    | 1148.403 | 16.68    | 1148.403 | 16.68    | 1148.403 | 16.63705 | 1148.403 | 16.6456 |
| 16.43382 | 1148.403 | 16.68793 | 1148.403 | 16.68672 | 1148.403 | 16.64    | 1148.403 | 16.65   |
| 16.44    | 1148.403 | 16.69    | 1148.403 | 16.69    | 1148.403 | 16.64705 | 1148.403 | 16.6556 |
| 16.44382 | 1148.403 | 16.69793 | 1148.403 | 16.69672 | 1148.403 | 16.65    | 1148.403 | 16.66   |
| 16.45    | 1148.403 | 16.7     | 1148.403 | 16.7     | 1148.403 | 16.65705 | 1148.403 | 16.6656 |
| 16.45382 | 1148.403 | 16.70793 | 1148.403 | 16.70672 | 1148.403 | 16.66    | 1148.403 | 16.67   |
| 16.46    | 1148.403 | 16.71    | 1148.403 | 16.71    | 1148.403 | 16.66705 | 1148.403 | 16.6756 |
| 16.46382 | 1148.403 | 16.71793 | 1148.403 | 16.71672 | 1148.403 | 16.67    | 1148.403 | 16.68   |
| 16.47    | 1148.403 | 16.72    | 1148.403 | 16.72    | 1148.403 | 16.67705 | 1148.403 | 16.6856 |
| 16.47382 | 1148.403 | 16.72793 | 1148.403 | 16.72672 | 1148.403 | 16.68    | 1148.403 | 16.69   |
| 16.48    | 1148.403 | 16.73    | 1148.403 | 16.73    | 1148.403 | 16.68705 | 1148.403 | 16.6956 |
| 16.48382 | 1148.403 | 16.73793 | 1148.403 | 16.73672 | 1148.403 | 16.69    | 1148.403 | 16.7    |
| 16.49    | 1148.403 | 16.74    | 1148.403 | 16.74    | 1148.403 | 16.69705 | 1148.403 | 16.7056 |
| 16.49382 | 1148.403 | 16.74793 | 1148.403 | 16.74672 | 1148.403 | 16.7     | 1148.403 | 16.71   |
| 16.5     | 1148.403 | 16.75    | 1148.403 | 16.75    | 1148.403 | 16.70705 | 1148.403 | 16.7156 |
| 16.50382 | 1148.403 | 16.75793 | 1148.403 | 16.75672 | 1148.403 | 16.71    | 1148.403 | 16.72   |
| 16.51    | 1148.403 | 16.76    | 1148.403 | 16.76    | 1148.403 | 16.71705 | 1148.403 | 16.7256 |
| 16.51382 | 1148.403 | 16.76793 | 1148.403 | 16.76672 | 1148.403 | 16.72    | 1148.403 | 16.73   |

|          |          |          |          |          |          |          |          |         |
|----------|----------|----------|----------|----------|----------|----------|----------|---------|
| 16.52    | 1148.403 | 16.77    | 1148.403 | 16.77    | 1148.403 | 16.72705 | 1148.403 | 16.7356 |
| 16.52382 | 1148.403 | 16.77793 | 1148.403 | 16.77672 | 1148.403 | 16.73    | 1148.403 | 16.74   |
| 16.53    | 1148.403 | 16.78    | 1148.403 | 16.78    | 1148.403 | 16.73705 | 1148.403 | 16.7456 |
| 16.53382 | 1148.403 | 16.78793 | 1148.403 | 16.78672 | 1148.403 | 16.74    | 1148.403 | 16.75   |
| 16.54    | 1148.403 | 16.79    | 1148.403 | 16.79    | 1148.403 | 16.74705 | 1148.403 | 16.7556 |
| 16.54382 | 1148.403 | 16.79793 | 1148.403 | 16.79672 | 1148.403 | 16.75    | 1148.403 | 16.76   |
| 16.55    | 1148.403 | 16.8     | 1148.403 | 16.8     | 1148.403 | 16.75705 | 1148.403 | 16.7656 |
| 16.55382 | 1148.403 | 16.80793 | 1148.403 | 16.80672 | 1148.403 | 16.76    | 1148.403 | 16.77   |
| 16.56    | 1148.403 | 16.81    | 1148.403 | 16.81    | 1148.403 | 16.76705 | 1148.403 | 16.7756 |
| 16.56382 | 1148.403 | 16.81793 | 1148.403 | 16.81672 | 1148.403 | 16.77    | 1148.403 | 16.78   |
| 16.57    | 1148.403 | 16.82    | 1148.403 | 16.82    | 1148.403 | 16.77705 | 1148.403 | 16.7856 |
| 16.57382 | 1148.403 | 16.82793 | 1148.403 | 16.82672 | 1148.403 | 16.78    | 1148.403 | 16.79   |
| 16.58    | 1148.403 | 16.83    | 1148.403 | 16.83    | 1148.403 | 16.78705 | 1148.403 | 16.7956 |
| 16.58382 | 1148.403 | 16.83793 | 1148.403 | 16.83672 | 1148.403 | 16.79    | 1148.403 | 16.8    |
| 16.59    | 1148.403 | 16.84    | 1148.403 | 16.84    | 1148.403 | 16.79705 | 1148.403 | 16.8056 |
| 16.59382 | 1148.403 | 16.84793 | 1148.403 | 16.84672 | 1148.403 | 16.8     | 1148.403 | 16.81   |
| 16.6     | 1148.403 | 16.85    | 1148.403 | 16.85    | 1148.403 | 16.80705 | 1148.403 | 16.8156 |
| 16.60382 | 1148.403 | 16.85793 | 1148.403 | 16.85672 | 1148.403 | 16.81    | 1148.403 | 16.82   |
| 16.61    | 1148.403 | 16.86    | 1148.403 | 16.86    | 1148.403 | 16.81705 | 1148.403 | 16.8256 |
| 16.61382 | 1148.403 | 16.86793 | 1148.403 | 16.86672 | 1148.403 | 16.82    | 1148.403 | 16.83   |
| 16.62    | 1148.403 | 16.87    | 1148.403 | 16.87    | 1148.403 | 16.82705 | 1148.403 | 16.8356 |
| 16.62382 | 1148.403 | 16.87793 | 1148.403 | 16.87672 | 1148.403 | 16.83    | 1148.403 | 16.84   |
| 16.63    | 1148.403 | 16.88    | 1148.403 | 16.88    | 1148.403 | 16.83705 | 1148.403 | 16.8456 |
| 16.63382 | 1148.403 | 16.88793 | 1148.403 | 16.88672 | 1148.403 | 16.84    | 1148.403 | 16.85   |
| 16.64    | 1148.403 | 16.89    | 1148.403 | 16.89    | 1148.403 | 16.84705 | 1148.403 | 16.8556 |
| 16.64382 | 1148.403 | 16.89793 | 1148.403 | 16.89672 | 1148.403 | 16.85    | 1148.403 | 16.86   |
| 16.65    | 1148.403 | 16.9     | 1148.403 | 16.9     | 1148.403 | 16.85705 | 1148.403 | 16.8656 |
| 16.65382 | 1148.403 | 16.90793 | 1148.403 | 16.90672 | 1148.403 | 16.86    | 1148.403 | 16.87   |
| 16.66    | 1148.403 | 16.91    | 1148.403 | 16.91    | 1148.403 | 16.86705 | 1148.403 | 16.8756 |
| 16.66382 | 1148.403 | 16.91793 | 1148.403 | 16.91672 | 1148.403 | 16.87    | 1148.403 | 16.88   |
| 16.67    | 1148.403 | 16.92    | 1148.403 | 16.92    | 1148.403 | 16.87705 | 1148.403 | 16.8856 |
| 16.67382 | 1148.403 | 16.92793 | 1148.403 | 16.92672 | 1148.403 | 16.88    | 1148.403 | 16.89   |
| 16.68    | 1148.403 | 16.93    | 1148.403 | 16.93    | 1148.403 | 16.88705 | 1148.403 | 16.8956 |
| 16.68382 | 1148.403 | 16.93793 | 1148.403 | 16.93672 | 1148.403 | 16.89    | 1148.403 | 16.9    |
| 16.69    | 1148.403 | 16.94    | 1148.403 | 16.94    | 1148.403 | 16.89705 | 1148.403 | 16.9056 |
| 16.69382 | 1148.403 | 16.94793 | 1148.403 | 16.94672 | 1148.403 | 16.9     | 1148.403 | 16.91   |
| 16.7     | 1148.403 | 16.95    | 1148.403 | 16.95    | 1148.403 | 16.90705 | 1148.403 | 16.9156 |
| 16.70382 | 1148.403 | 16.95793 | 1148.403 | 16.95672 | 1148.403 | 16.91    | 1148.403 | 16.92   |
| 16.71    | 1148.403 | 16.96    | 1148.403 | 16.96    | 1148.403 | 16.91705 | 1148.403 | 16.9256 |
| 16.71382 | 1148.403 | 16.96793 | 1148.403 | 16.96672 | 1148.403 | 16.92    | 1148.403 | 16.93   |
| 16.72    | 1148.403 | 16.97    | 1148.403 | 16.97    | 1148.403 | 16.92705 | 1148.403 | 16.9356 |
| 16.72382 | 1148.403 | 16.97793 | 1148.403 | 16.97672 | 1148.403 | 16.93    | 1148.403 | 16.94   |
| 16.73    | 1148.403 | 16.98    | 1148.403 | 16.98    | 1148.403 | 16.93705 | 1148.403 | 16.9456 |
| 16.73382 | 1148.403 | 16.98793 | 1148.403 | 16.98672 | 1148.403 | 16.94    | 1148.403 | 16.95   |
| 16.74    | 1148.403 | 16.99    | 1148.403 | 16.99    | 1148.403 | 16.94705 | 1148.403 | 16.9556 |
| 16.74382 | 1148.403 | 16.99793 | 1148.403 | 16.99672 | 1148.403 | 16.95    | 1148.403 | 16.96   |
| 16.75    | 1148.403 | 17       | 1148.403 | 17       | 1148.403 | 16.95705 | 1148.403 | 16.9656 |

|          |          |          |          |          |          |          |          |         |
|----------|----------|----------|----------|----------|----------|----------|----------|---------|
| 16.75382 | 1148.403 | 17.00793 | 1148.403 | 17.00672 | 1148.403 | 16.96    | 1148.403 | 16.97   |
| 16.76    | 1148.403 | 17.01    | 1148.403 | 17.01    | 1148.403 | 16.96705 | 1148.403 | 16.9756 |
| 16.76382 | 1148.403 | 17.01793 | 1148.403 | 17.01672 | 1148.403 | 16.97    | 1148.403 | 16.98   |
| 16.77    | 1148.403 | 17.02    | 1148.403 | 17.02    | 1148.403 | 16.97705 | 1148.403 | 16.9856 |
| 16.77382 | 1148.403 | 17.02793 | 1148.403 | 17.02672 | 1148.403 | 16.98    | 1148.403 | 16.99   |
| 16.78    | 1148.403 | 17.03    | 1148.403 | 17.03    | 1148.403 | 16.98705 | 1148.403 | 16.9956 |
| 16.78382 | 1148.403 | 17.03793 | 1148.403 | 17.03672 | 1148.403 | 16.99    | 1148.403 | 17      |
| 16.79    | 1148.403 | 17.04    | 1148.403 | 17.04    | 1148.403 | 16.99705 | 1148.403 | 17.0056 |
| 16.79382 | 1148.403 | 17.04793 | 1148.403 | 17.04672 | 1148.403 | 17       | 1148.403 | 17.01   |
| 16.8     | 1148.403 | 17.05    | 1148.403 | 17.05    | 1148.403 | 17.00705 | 1148.403 | 17.0156 |
| 16.80382 | 1148.403 | 17.05793 | 1148.403 | 17.05672 | 1148.403 | 17.01    | 1148.403 | 17.02   |
| 16.81    | 1148.403 | 17.06    | 1148.403 | 17.06    | 1148.403 | 17.01705 | 1148.403 | 17.0256 |
| 16.81382 | 1148.403 | 17.06793 | 1148.403 | 17.06672 | 1148.403 | 17.02    | 1148.403 | 17.03   |
| 16.82    | 1148.403 | 17.07    | 1148.403 | 17.07    | 1148.403 | 17.02705 | 1148.403 | 17.0356 |
| 16.82382 | 1148.403 | 17.07793 | 1148.403 | 17.07672 | 1148.403 | 17.03    | 1148.403 | 17.04   |
| 16.83    | 1148.403 | 17.08    | 1148.403 | 17.08    | 1148.403 | 17.03705 | 1148.403 | 17.0456 |
| 16.83382 | 1148.403 | 17.08793 | 1148.403 | 17.08672 | 1148.403 | 17.04    | 1148.403 | 17.05   |
| 16.84    | 1148.403 | 17.09    | 1148.403 | 17.09    | 1148.403 | 17.04705 | 1148.403 | 17.0556 |
| 16.84382 | 1148.403 | 17.09793 | 1148.403 | 17.09672 | 1148.403 | 17.05    | 1148.403 | 17.06   |
| 16.85    | 1148.403 | 17.1     | 1148.403 | 17.1     | 1148.403 | 17.05705 | 1148.403 | 17.0656 |
| 16.85382 | 1148.403 | 17.10793 | 1148.403 | 17.10672 | 1148.403 | 17.06    | 1148.403 | 17.07   |
| 16.86    | 1148.403 | 17.11    | 1148.403 | 17.11    | 1148.403 | 17.06705 | 1148.403 | 17.0756 |
| 16.86382 | 1148.403 | 17.11793 | 1148.403 | 17.11672 | 1148.403 | 17.07    | 1148.403 | 17.08   |
| 16.87    | 1148.403 | 17.12    | 1148.403 | 17.12    | 1148.403 | 17.07705 | 1148.403 | 17.0856 |
| 16.87382 | 1148.403 | 17.12793 | 1148.403 | 17.12672 | 1148.403 | 17.08    | 1148.403 | 17.09   |
| 16.88    | 1148.403 | 17.13    | 1148.403 | 17.13    | 1148.403 | 17.08705 | 1148.403 | 17.0956 |
| 16.88382 | 1148.403 | 17.13793 | 1148.403 | 17.13672 | 1148.403 | 17.09    | 1148.403 | 17.1    |
| 16.89    | 1148.403 | 17.14    | 1148.403 | 17.14    | 1148.403 | 17.09705 | 1148.403 | 17.1056 |
| 16.89382 | 1148.403 | 17.14793 | 1148.403 | 17.14672 | 1148.403 | 17.1     | 1148.403 | 17.11   |
| 16.9     | 1148.403 | 17.15    | 1148.403 | 17.15    | 1148.403 | 17.10705 | 1148.403 | 17.1156 |
| 16.90382 | 1148.403 | 17.15793 | 1148.403 | 17.15672 | 1148.403 | 17.11    | 1148.403 | 17.12   |
| 16.91    | 1148.403 | 17.16    | 1148.403 | 17.16    | 1148.403 | 17.11705 | 1148.403 | 17.1256 |
| 16.91382 | 1148.403 | 17.16793 | 1148.403 | 17.16672 | 1148.403 | 17.12    | 1148.403 | 17.13   |
| 16.92    | 1148.403 | 17.17    | 1148.403 | 17.17    | 1148.403 | 17.12705 | 1148.403 | 17.1356 |
| 16.92382 | 1148.403 | 17.17793 | 1148.403 | 17.17672 | 1148.403 | 17.13    | 1148.403 | 17.14   |
| 16.93    | 1148.403 | 17.18    | 1148.403 | 17.18    | 1148.403 | 17.13705 | 1148.403 | 17.1456 |
| 16.93382 | 1148.403 | 17.18793 | 1148.403 | 17.18672 | 1148.403 | 17.14    | 1148.403 | 17.15   |
| 16.94    | 1148.403 | 17.19    | 1148.403 | 17.19    | 1148.403 | 17.14705 | 1148.403 | 17.1556 |
| 16.94382 | 1148.403 | 17.19793 | 1148.403 | 17.19672 | 1148.403 | 17.15    | 1148.403 | 17.16   |
| 16.95    | 1148.403 | 17.2     | 1148.403 | 17.2     | 1148.403 | 17.15705 | 1148.403 | 17.1656 |
| 16.95382 | 1148.403 | 17.20793 | 1148.403 | 17.20672 | 1148.403 | 17.16    | 1148.403 | 17.17   |
| 16.96    | 1148.403 | 17.21    | 1148.403 | 17.21    | 1148.403 | 17.16705 | 1148.403 | 17.1756 |
| 16.96382 | 1148.403 | 17.21793 | 1148.403 | 17.21672 | 1148.403 | 17.17    | 1148.403 | 17.18   |
| 16.97    | 1148.403 | 17.22    | 1148.403 | 17.22    | 1148.403 | 17.17705 | 1148.403 | 17.1856 |
| 16.97382 | 1148.403 | 17.22793 | 1148.403 | 17.22672 | 1148.403 | 17.18    | 1148.403 | 17.19   |
| 16.98    | 1148.403 | 17.23    | 1148.403 | 17.23    | 1148.403 | 17.18705 | 1148.403 | 17.1956 |
| 16.98382 | 1148.403 | 17.23793 | 1148.403 | 17.23672 | 1148.403 | 17.19    | 1148.403 | 17.2    |

|          |          |          |          |          |          |          |          |         |
|----------|----------|----------|----------|----------|----------|----------|----------|---------|
| 16.99    | 1148.403 | 17.24    | 1148.403 | 17.24    | 1148.403 | 17.19705 | 1148.403 | 17.2056 |
| 16.99382 | 1148.403 | 17.24793 | 1148.403 | 17.24672 | 1148.403 | 17.2     | 1148.403 | 17.21   |
| 17       | 1148.403 | 17.25    | 1148.403 | 17.25    | 1148.403 | 17.20705 | 1148.403 | 17.2156 |
| 17.00382 | 1148.403 | 17.25793 | 1148.403 | 17.25672 | 1148.403 | 17.21    | 1148.403 | 17.22   |
| 17.01    | 1148.403 | 17.26    | 1148.403 | 17.26    | 1148.403 | 17.21705 | 1148.403 | 17.2256 |
| 17.01382 | 1148.403 | 17.26793 | 1148.403 | 17.26672 | 1148.403 | 17.22    | 1148.403 | 17.23   |
| 17.02    | 1148.403 | 17.27    | 1148.403 | 17.27    | 1148.403 | 17.22705 | 1148.403 | 17.2356 |
| 17.02382 | 1148.403 | 17.27793 | 1148.403 | 17.27672 | 1148.403 | 17.23    | 1148.403 | 17.24   |
| 17.03    | 1148.403 | 17.28    | 1148.403 | 17.28    | 1148.403 | 17.23705 | 1148.403 | 17.2456 |
| 17.03382 | 1148.403 | 17.28793 | 1148.403 | 17.28672 | 1148.403 | 17.24    | 1148.403 | 17.25   |
| 17.04    | 1148.403 | 17.29    | 1148.403 | 17.29    | 1148.403 | 17.24705 | 1148.403 | 17.2556 |
| 17.04382 | 1148.403 | 17.29793 | 1148.403 | 17.29672 | 1148.403 | 17.25    | 1148.403 | 17.26   |
| 17.05    | 1148.403 | 17.3     | 1148.403 | 17.3     | 1148.403 | 17.25705 | 1148.403 | 17.2656 |
| 17.05382 | 1148.403 | 17.30793 | 1148.403 | 17.30672 | 1148.403 | 17.26    | 1148.403 | 17.27   |
| 17.06    | 1148.403 | 17.31    | 1148.403 | 17.31    | 1148.403 | 17.26705 | 1148.403 | 17.2756 |
| 17.06382 | 1148.403 | 17.31793 | 1148.403 | 17.31672 | 1148.403 | 17.27    | 1148.403 | 17.28   |
| 17.07    | 1148.403 | 17.32    | 1148.403 | 17.32    | 1148.403 | 17.27705 | 1148.403 | 17.2856 |
| 17.07382 | 1148.403 | 17.32793 | 1148.403 | 17.32672 | 1148.403 | 17.28    | 1148.403 | 17.29   |
| 17.08    | 1148.403 | 17.33    | 1148.403 | 17.33    | 1148.403 | 17.28705 | 1148.403 | 17.2956 |
| 17.08382 | 1148.403 | 17.33793 | 1148.403 | 17.33672 | 1148.403 | 17.29    | 1148.403 | 17.3    |
| 17.09    | 1148.403 | 17.34    | 1148.403 | 17.34    | 1148.403 | 17.29705 | 1148.403 | 17.3056 |
| 17.09382 | 1148.403 | 17.34793 | 1148.403 | 17.34672 | 1148.403 | 17.3     | 1148.403 | 17.31   |
| 17.1     | 1148.403 | 17.35    | 1148.403 | 17.35    | 1148.403 | 17.30705 | 1148.403 | 17.3156 |
| 17.10382 | 1148.403 | 17.35793 | 1148.403 | 17.35672 | 1148.403 | 17.31    | 1148.403 | 17.32   |
| 17.11    | 1148.403 | 17.36    | 1148.403 | 17.36    | 1148.403 | 17.31705 | 1148.403 | 17.3256 |
| 17.11382 | 1148.403 | 17.36793 | 1148.403 | 17.36672 | 1148.403 | 17.32    | 1148.403 | 17.33   |
| 17.12    | 1148.403 | 17.37    | 1148.403 | 17.37    | 1148.403 | 17.32705 | 1148.403 | 17.3356 |
| 17.12382 | 1148.403 | 17.37793 | 1148.403 | 17.37672 | 1148.403 | 17.33    | 1148.403 | 17.34   |
| 17.13    | 1148.403 | 17.38    | 1148.403 | 17.38    | 1148.403 | 17.33705 | 1148.403 | 17.3456 |
| 17.13382 | 1148.403 | 17.38793 | 1148.403 | 17.38672 | 1148.403 | 17.34    | 1148.403 | 17.35   |
| 17.14    | 1148.403 | 17.39    | 1148.403 | 17.39    | 1148.403 | 17.34705 | 1148.403 | 17.3556 |
| 17.14382 | 1148.403 | 17.39793 | 1148.403 | 17.39672 | 1148.403 | 17.35    | 1148.403 | 17.36   |
| 17.15    | 1148.403 | 17.4     | 1148.403 | 17.4     | 1148.403 | 17.35705 | 1148.403 | 17.3656 |
| 17.15382 | 1148.403 | 17.40793 | 1148.403 | 17.40672 | 1148.403 | 17.36    | 1148.403 | 17.37   |
| 17.16    | 1148.403 | 17.41    | 1148.403 | 17.41    | 1148.403 | 17.36705 | 1148.403 | 17.3756 |
| 17.16382 | 1148.403 | 17.41793 | 1148.403 | 17.41672 | 1148.403 | 17.37    | 1148.403 | 17.38   |
| 17.17    | 1148.403 | 17.42    | 1148.403 | 17.42    | 1148.403 | 17.37705 | 1148.403 | 17.3856 |
| 17.17382 | 1148.403 | 17.42793 | 1148.403 | 17.42672 | 1148.403 | 17.38    | 1148.403 | 17.39   |
| 17.18    | 1148.403 | 17.43    | 1148.403 | 17.43    | 1148.403 | 17.38705 | 1148.403 | 17.3956 |
| 17.18382 | 1148.403 | 17.43793 | 1148.403 | 17.43672 | 1148.403 | 17.39    | 1148.403 | 17.4    |
| 17.19    | 1148.403 | 17.44    | 1148.403 | 17.44    | 1148.403 | 17.39705 | 1148.403 | 17.4056 |
| 17.19382 | 1148.403 | 17.44793 | 1148.403 | 17.44672 | 1148.403 | 17.4     | 1148.403 | 17.41   |
| 17.2     | 1148.403 | 17.45    | 1148.403 | 17.45    | 1148.403 | 17.40705 | 1148.403 | 17.4156 |
| 17.20382 | 1148.403 | 17.45793 | 1148.403 | 17.45672 | 1148.403 | 17.41    | 1148.403 | 17.42   |
| 17.21    | 1148.403 | 17.46    | 1148.403 | 17.46    | 1148.403 | 17.41705 | 1148.403 | 17.4256 |
| 17.21382 | 1148.403 | 17.46793 | 1148.403 | 17.46672 | 1148.403 | 17.42    | 1148.403 | 17.43   |
| 17.22    | 1148.403 | 17.47    | 1148.403 | 17.47    | 1148.403 | 17.42705 | 1148.403 | 17.4356 |



|          |          |          |          |          |          |          |          |         |
|----------|----------|----------|----------|----------|----------|----------|----------|---------|
| 17.22382 | 1148.403 | 17.47793 | 1148.403 | 17.47672 | 1148.403 | 17.43    | 1148.403 | 17.44   |
| 17.23    | 1148.403 | 17.48    | 1148.403 | 17.48    | 1148.403 | 17.43705 | 1148.403 | 17.4456 |
| 17.23382 | 1148.403 | 17.48793 | 1148.403 | 17.48672 | 1148.403 | 17.44    | 1148.403 | 17.45   |
| 17.24    | 1148.403 | 17.49    | 1148.403 | 17.49    | 1148.403 | 17.44705 | 1148.403 | 17.4556 |
| 17.24382 | 1148.403 | 17.49793 | 1148.403 | 17.49672 | 1148.403 | 17.45    | 1148.403 | 17.46   |
| 17.25    | 1148.403 | 17.5     | 1148.403 | 17.5     | 1148.403 | 17.45705 | 1148.403 | 17.4656 |
| 17.25382 | 1148.403 | 17.50793 | 1148.403 | 17.50672 | 1148.403 | 17.46    | 1148.403 | 17.47   |
| 17.26    | 1148.403 | 17.51    | 1148.403 | 17.51    | 1148.403 | 17.46705 | 1148.403 | 17.4756 |
| 17.26382 | 1148.403 | 17.51793 | 1148.403 | 17.51672 | 1148.403 | 17.47    | 1148.403 | 17.48   |
| 17.27    | 1148.403 | 17.52    | 1148.403 | 17.52    | 1148.403 | 17.47705 | 1148.403 | 17.4856 |
| 17.27382 | 1148.403 | 17.52793 | 1148.403 | 17.52672 | 1148.403 | 17.48    | 1148.403 | 17.49   |
| 17.28    | 1148.403 | 17.53    | 1148.403 | 17.53    | 1148.403 | 17.48705 | 1148.403 | 17.4956 |
| 17.28382 | 1148.403 | 17.53793 | 1148.403 | 17.53672 | 1148.403 | 17.49    | 1148.403 | 17.5    |
| 17.29    | 1148.403 | 17.54    | 1148.403 | 17.54    | 1148.403 | 17.49705 | 1148.403 | 17.5056 |
| 17.29382 | 1148.403 | 17.54793 | 1148.403 | 17.54672 | 1148.403 | 17.5     | 1148.403 | 17.51   |
| 17.3     | 1148.403 | 17.55    | 1148.403 | 17.55    | 1148.403 | 17.50705 | 1148.403 | 17.5156 |
| 17.30382 | 1148.403 | 17.55793 | 1148.403 | 17.55672 | 1148.403 | 17.51    | 1148.403 | 17.52   |
| 17.31    | 1148.403 | 17.56    | 1148.403 | 17.56    | 1148.403 | 17.51705 | 1148.403 | 17.5256 |
| 17.31382 | 1148.403 | 17.56793 | 1148.403 | 17.56672 | 1148.403 | 17.52    | 1148.403 | 17.53   |
| 17.32    | 1148.403 | 17.57    | 1148.403 | 17.57    | 1148.403 | 17.52705 | 1148.403 | 17.5356 |
| 17.32382 | 1148.403 | 17.57793 | 1148.403 | 17.57672 | 1148.403 | 17.53    | 1148.403 | 17.54   |
| 17.33    | 1148.403 | 17.58    | 1148.403 | 17.58    | 1148.403 | 17.53705 | 1148.403 | 17.5456 |
| 17.33382 | 1148.403 | 17.58793 | 1148.403 | 17.58672 | 1148.403 | 17.54    | 1148.403 | 17.55   |
| 17.34    | 1148.403 | 17.59    | 1148.403 | 17.59    | 1148.403 | 17.54705 | 1148.403 | 17.5556 |
| 17.34382 | 1148.403 | 17.59793 | 1148.403 | 17.59672 | 1148.403 | 17.55    | 1148.403 | 17.56   |
| 17.35    | 1148.403 | 17.6     | 1148.403 | 17.6     | 1148.403 | 17.55705 | 1148.403 | 17.5656 |
| 17.35382 | 1148.403 | 17.60793 | 1148.403 | 17.60672 | 1148.403 | 17.56    | 1148.403 | 17.57   |
| 17.36    | 1148.403 | 17.61    | 1148.403 | 17.61    | 1148.403 | 17.56705 | 1148.403 | 17.5756 |
| 17.36382 | 1148.403 | 17.61793 | 1148.403 | 17.61672 | 1148.403 | 17.57    | 1148.403 | 17.58   |
| 17.37    | 1148.403 | 17.62    | 1148.403 | 17.62    | 1148.403 | 17.57705 | 1148.403 | 17.5856 |
| 17.37382 | 1148.403 | 17.62793 | 1148.403 | 17.62672 | 1148.403 | 17.58    | 1148.403 | 17.59   |
| 17.38    | 1148.403 | 17.63    | 1148.403 | 17.63    | 1148.403 | 17.58705 | 1148.403 | 17.5956 |
| 17.38382 | 1148.403 | 17.63793 | 1148.403 | 17.63672 | 1148.403 | 17.59    | 1148.403 | 17.6    |
| 17.39    | 1148.403 | 17.64    | 1148.403 | 17.64    | 1148.403 | 17.59705 | 1148.403 | 17.6056 |
| 17.39382 | 1148.403 | 17.6477  | 1148.403 | 17.64672 | 1148.403 | 17.6     | 1148.403 | 17.61   |
| 17.4     | 1148.403 | 17.65    | 1148.403 | 17.65    | 1148.403 | 17.60705 | 1148.403 | 17.6156 |
| 17.40382 | 1148.403 | 17.65767 | 1148.403 | 17.65672 | 1148.403 | 17.61    | 1148.403 | 17.62   |
| 17.41    | 1148.403 | 17.66    | 1148.403 | 17.66    | 1148.403 | 17.61705 | 1148.403 | 17.6256 |
| 17.41382 | 1148.403 | 17.66767 | 1148.403 | 17.66672 | 1148.403 | 17.62    | 1148.403 | 17.63   |
| 17.42    | 1148.403 | 17.67    | 1148.403 | 17.67    | 1148.403 | 17.62705 | 1148.403 | 17.6356 |
| 17.42382 | 1148.403 | 17.67767 | 1148.403 | 17.67672 | 1148.403 | 17.63    | 1148.403 | 17.64   |
| 17.43    | 1148.403 | 17.68    | 1148.403 | 17.68    | 1148.403 | 17.63705 | 1148.403 | 17.6456 |
| 17.43382 | 1148.403 | 17.68767 | 1148.403 | 17.68672 | 1148.403 | 17.64    | 1148.403 | 17.65   |
| 17.44    | 1148.403 | 17.69    | 1148.403 | 17.69    | 1148.403 | 17.64705 | 1148.403 | 17.6556 |
| 17.44382 | 1148.403 | 17.69767 | 1148.403 | 17.69672 | 1148.403 | 17.65    | 1148.403 | 17.66   |
| 17.45    | 1148.403 | 17.7     | 1148.403 | 17.7     | 1148.403 | 17.65705 | 1148.403 | 17.6656 |
| 17.45382 | 1148.403 | 17.70767 | 1148.403 | 17.70672 | 1148.403 | 17.66    | 1148.403 | 17.67   |

|          |          |          |          |          |          |          |          |         |
|----------|----------|----------|----------|----------|----------|----------|----------|---------|
| 17.46    | 1148.403 | 17.71    | 1148.403 | 17.71    | 1148.403 | 17.66705 | 1148.403 | 17.6756 |
| 17.46382 | 1148.403 | 17.71767 | 1148.403 | 17.71672 | 1148.403 | 17.67    | 1148.403 | 17.68   |
| 17.47    | 1148.403 | 17.72    | 1148.403 | 17.72    | 1148.403 | 17.67705 | 1148.403 | 17.6856 |
| 17.47382 | 1148.403 | 17.72767 | 1148.403 | 17.72672 | 1148.403 | 17.68    | 1148.403 | 17.69   |
| 17.48    | 1148.403 | 17.73    | 1148.403 | 17.73    | 1148.403 | 17.68705 | 1148.403 | 17.6956 |
| 17.48382 | 1148.403 | 17.73767 | 1148.403 | 17.73672 | 1148.403 | 17.69    | 1148.403 | 17.7    |
| 17.49    | 1148.403 | 17.74    | 1148.403 | 17.74    | 1148.403 | 17.69705 | 1148.403 | 17.7056 |
| 17.49382 | 1148.403 | 17.74767 | 1148.403 | 17.74672 | 1148.403 | 17.7     | 1148.403 | 17.71   |
| 17.5     | 1148.403 | 17.75    | 1148.403 | 17.75    | 1148.403 | 17.70705 | 1148.403 | 17.7156 |
| 17.50382 | 1148.403 | 17.75767 | 1148.403 | 17.75672 | 1148.403 | 17.71    | 1148.403 | 17.72   |
| 17.51    | 1148.403 | 17.76    | 1148.403 | 17.76    | 1148.403 | 17.71705 | 1148.403 | 17.7256 |
| 17.51382 | 1148.403 | 17.76767 | 1148.403 | 17.76672 | 1148.403 | 17.72    | 1148.403 | 17.73   |
| 17.52    | 1148.403 | 17.77    | 1148.403 | 17.77    | 1148.403 | 17.72705 | 1148.403 | 17.7356 |
| 17.52382 | 1148.403 | 17.77767 | 1148.403 | 17.77672 | 1148.403 | 17.73    | 1148.403 | 17.74   |
| 17.53    | 1148.403 | 17.78    | 1148.403 | 17.78    | 1148.403 | 17.73705 | 1148.403 | 17.7456 |
| 17.53382 | 1148.403 | 17.78767 | 1148.403 | 17.78672 | 1148.403 | 17.74    | 1148.403 | 17.75   |
| 17.54    | 1148.403 | 17.79    | 1148.403 | 17.79    | 1148.403 | 17.74705 | 1148.403 | 17.7556 |
| 17.54382 | 1148.403 | 17.79767 | 1148.403 | 17.79672 | 1148.403 | 17.75    | 1148.403 | 17.76   |
| 17.55    | 1148.403 | 17.8     | 1148.403 | 17.8     | 1148.403 | 17.75705 | 1148.403 | 17.7656 |
| 17.55382 | 1148.403 | 17.80767 | 1148.403 | 17.80672 | 1148.403 | 17.76    | 1148.403 | 17.77   |
| 17.56    | 1148.403 | 17.81    | 1148.403 | 17.81    | 1148.403 | 17.76705 | 1148.403 | 17.7756 |
| 17.56382 | 1148.403 | 17.81767 | 1148.403 | 17.81672 | 1148.403 | 17.77    | 1148.403 | 17.78   |
| 17.57    | 1148.403 | 17.82    | 1148.403 | 17.82    | 1148.403 | 17.77705 | 1148.403 | 17.7856 |
| 17.57382 | 1148.403 | 17.82767 | 1148.403 | 17.82672 | 1148.403 | 17.78    | 1148.403 | 17.79   |
| 17.58    | 1148.403 | 17.83    | 1148.403 | 17.83    | 1148.403 | 17.78705 | 1148.403 | 17.7956 |
| 17.58382 | 1148.403 | 17.83767 | 1148.403 | 17.83672 | 1148.403 | 17.79    | 1148.403 | 17.8    |
| 17.59    | 1148.403 | 17.84    | 1148.403 | 17.84    | 1148.403 | 17.79705 | 1148.403 | 17.8056 |
| 17.59382 | 1148.403 | 17.84767 | 1148.403 | 17.84672 | 1148.403 | 17.8     | 1148.403 | 17.81   |
| 17.6     | 1148.403 | 17.85    | 1148.403 | 17.85    | 1148.403 | 17.80705 | 1148.403 | 17.8156 |
| 17.60382 | 1148.403 | 17.85767 | 1148.403 | 17.85672 | 1148.403 | 17.81    | 1148.403 | 17.82   |
| 17.61    | 1148.403 | 17.86    | 1148.403 | 17.86    | 1148.403 | 17.81705 | 1148.403 | 17.8256 |
| 17.61382 | 1148.403 | 17.86767 | 1148.403 | 17.86672 | 1148.403 | 17.82    | 1148.403 | 17.83   |
| 17.62    | 1148.403 | 17.87    | 1148.403 | 17.87    | 1148.403 | 17.82705 | 1148.403 | 17.8356 |
| 17.62382 | 1148.403 | 17.87767 | 1148.403 | 17.87672 | 1148.403 | 17.83    | 1148.403 | 17.84   |
| 17.63    | 1148.403 | 17.88    | 1148.403 | 17.88    | 1148.403 | 17.83705 | 1148.403 | 17.8456 |
| 17.63382 | 1148.403 | 17.88767 | 1148.403 | 17.88672 | 1148.403 | 17.84    | 1148.403 | 17.85   |
| 17.64    | 1148.403 | 17.89    | 1148.403 | 17.89    | 1148.403 | 17.84705 | 1148.403 | 17.8556 |
| 17.64382 | 1148.403 | 17.89767 | 1148.403 | 17.89672 | 1148.403 | 17.85    | 1148.403 | 17.86   |
| 17.65    | 1148.403 | 17.9     | 1148.403 | 17.9     | 1148.403 | 17.85705 | 1148.403 | 17.8656 |
| 17.65382 | 1148.403 | 17.90767 | 1148.403 | 17.90672 | 1148.403 | 17.86    | 1148.403 | 17.87   |
| 17.66    | 1148.403 | 17.91    | 1148.403 | 17.91    | 1148.403 | 17.86705 | 1148.403 | 17.8756 |
| 17.66382 | 1148.403 | 17.91767 | 1148.403 | 17.91672 | 1148.403 | 17.87    | 1148.403 | 17.88   |
| 17.67    | 1148.403 | 17.92    | 1148.403 | 17.92    | 1148.403 | 17.87705 | 1148.403 | 17.8856 |
| 17.67382 | 1148.403 | 17.92767 | 1148.403 | 17.92672 | 1148.403 | 17.88    | 1148.403 | 17.89   |
| 17.68    | 1148.403 | 17.93    | 1148.403 | 17.93    | 1148.403 | 17.88705 | 1148.403 | 17.8956 |
| 17.68382 | 1148.403 | 17.93767 | 1148.403 | 17.93672 | 1148.403 | 17.89    | 1148.403 | 17.9    |
| 17.69    | 1148.403 | 17.94    | 1148.403 | 17.94    | 1148.403 | 17.89705 | 1148.403 | 17.9056 |

|          |          |          |          |          |          |          |          |         |
|----------|----------|----------|----------|----------|----------|----------|----------|---------|
| 17.69382 | 1148.403 | 17.94767 | 1148.403 | 17.94672 | 1148.403 | 17.9     | 1148.403 | 17.91   |
| 17.7     | 1148.403 | 17.95    | 1148.403 | 17.95    | 1148.403 | 17.90705 | 1148.403 | 17.9156 |
| 17.70382 | 1148.403 | 17.95767 | 1148.403 | 17.95672 | 1148.403 | 17.91    | 1148.403 | 17.92   |
| 17.71    | 1148.403 | 17.96    | 1148.403 | 17.96    | 1148.403 | 17.91705 | 1148.403 | 17.9256 |
| 17.71382 | 1148.403 | 17.96767 | 1148.403 | 17.96672 | 1148.403 | 17.92    | 1148.403 | 17.93   |
| 17.72    | 1148.403 | 17.97    | 1148.403 | 17.97    | 1148.403 | 17.92705 | 1148.403 | 17.9356 |
| 17.72382 | 1148.403 | 17.97767 | 1148.403 | 17.97672 | 1148.403 | 17.93    | 1148.403 | 17.94   |
| 17.73    | 1148.403 | 17.98    | 1148.403 | 17.98    | 1148.403 | 17.93705 | 1148.403 | 17.9456 |
| 17.73382 | 1148.403 | 17.98767 | 1148.403 | 17.98672 | 1148.403 | 17.94    | 1148.403 | 17.95   |
| 17.74    | 1148.403 | 17.99    | 1148.403 | 17.99    | 1148.403 | 17.94705 | 1148.403 | 17.9556 |
| 17.74382 | 1148.403 | 17.99767 | 1148.403 | 17.99672 | 1148.403 | 17.95    | 1148.403 | 17.96   |
| 17.75    | 1148.403 | 18       | 1148.403 | 18       | 1148.403 | 17.95705 | 1148.403 | 17.9656 |
| 17.75382 | 1148.403 | 18.00767 | 1148.403 | 18.00672 | 1148.403 | 17.96    | 1148.403 | 17.97   |
| 17.76    | 1148.403 | 18.01    | 1148.403 | 18.01    | 1148.403 | 17.96705 | 1148.403 | 17.9756 |
| 17.76382 | 1148.403 | 18.01767 | 1148.403 | 18.01672 | 1148.403 | 17.97    | 1148.403 | 17.98   |
| 17.77    | 1148.403 | 18.02    | 1148.403 | 18.02    | 1148.403 | 17.97705 | 1148.403 | 17.9856 |
| 17.77382 | 1148.403 | 18.02767 | 1148.403 | 18.02672 | 1148.403 | 17.98    | 1148.403 | 17.99   |
| 17.78    | 1148.403 | 18.03    | 1148.403 | 18.03    | 1148.403 | 17.98705 | 1148.403 | 17.9956 |
| 17.78382 | 1148.403 | 18.03767 | 1148.403 | 18.03672 | 1148.403 | 17.99    | 1148.403 | 18      |
| 17.79    | 1148.403 | 18.04    | 1148.403 | 18.04    | 1148.403 | 17.99705 | 1148.403 | 18.0056 |
| 17.79382 | 1148.403 | 18.04767 | 1148.403 | 18.04672 | 1148.403 | 18       | 1148.403 | 18.01   |
| 17.8     | 1148.403 | 18.05    | 1148.403 | 18.05    | 1148.403 | 18.00705 | 1148.403 | 18.0156 |
| 17.80382 | 1148.403 | 18.05767 | 1148.403 | 18.05672 | 1148.403 | 18.01    | 1148.403 | 18.02   |
| 17.81    | 1148.403 | 18.06    | 1148.403 | 18.06    | 1148.403 | 18.01705 | 1148.403 | 18.0256 |
| 17.81382 | 1148.403 | 18.06767 | 1148.403 | 18.06672 | 1148.403 | 18.02    | 1148.403 | 18.03   |
| 17.82    | 1148.403 | 18.07    | 1148.403 | 18.07    | 1148.403 | 18.02705 | 1148.403 | 18.0356 |
| 17.82382 | 1148.403 | 18.07767 | 1148.403 | 18.07672 | 1148.403 | 18.03    | 1148.403 | 18.04   |
| 17.83    | 1148.403 | 18.08    | 1148.403 | 18.08    | 1148.403 | 18.03705 | 1148.403 | 18.0456 |
| 17.83382 | 1148.403 | 18.08767 | 1148.403 | 18.08672 | 1148.403 | 18.04    | 1148.403 | 18.05   |
| 17.84    | 1148.403 | 18.09    | 1148.403 | 18.09    | 1148.403 | 18.04705 | 1148.403 | 18.0556 |
| 17.84382 | 1148.403 | 18.09767 | 1148.403 | 18.09672 | 1148.403 | 18.05    | 1148.403 | 18.06   |
| 17.85    | 1148.403 | 18.1     | 1148.403 | 18.1     | 1148.403 | 18.05705 | 1148.403 | 18.0656 |
| 17.85382 | 1148.403 | 18.10767 | 1148.403 | 18.10672 | 1148.403 | 18.06    | 1148.403 | 18.07   |
| 17.86    | 1148.403 | 18.11    | 1148.403 | 18.11    | 1148.403 | 18.06705 | 1148.403 | 18.0756 |
| 17.86382 | 1148.403 | 18.11767 | 1148.403 | 18.11672 | 1148.403 | 18.07    | 1148.403 | 18.08   |
| 17.87    | 1148.403 | 18.12    | 1148.403 | 18.12    | 1148.403 | 18.07705 | 1148.403 | 18.0856 |
| 17.87382 | 1148.403 | 18.12767 | 1148.403 | 18.12672 | 1148.403 | 18.08    | 1148.403 | 18.09   |
| 17.88    | 1148.403 | 18.13    | 1148.403 | 18.13    | 1148.403 | 18.08705 | 1148.403 | 18.0956 |
| 17.88382 | 1148.403 | 18.13767 | 1148.403 | 18.13672 | 1148.403 | 18.09    | 1148.403 | 18.1    |
| 17.89    | 1148.403 | 18.14    | 1148.403 | 18.14    | 1148.403 | 18.09705 | 1148.403 | 18.1056 |
| 17.89382 | 1148.403 | 18.14767 | 1148.403 | 18.14672 | 1148.403 | 18.1     | 1148.403 | 18.11   |
| 17.9     | 1148.403 | 18.15    | 1148.403 | 18.15    | 1148.403 | 18.10705 | 1148.403 | 18.1156 |
| 17.90382 | 1148.403 | 18.15767 | 1148.403 | 18.15672 | 1148.403 | 18.11    | 1148.403 | 18.12   |
| 17.91    | 1148.403 | 18.16    | 1148.403 | 18.16    | 1148.403 | 18.11705 | 1148.403 | 18.1256 |
| 17.91382 | 1148.403 | 18.16767 | 1148.403 | 18.16672 | 1148.403 | 18.12    | 1148.403 | 18.13   |
| 17.92    | 1148.403 | 18.17    | 1148.403 | 18.17    | 1148.403 | 18.12705 | 1148.403 | 18.1356 |
| 17.92382 | 1148.403 | 18.17767 | 1148.403 | 18.17672 | 1148.403 | 18.13    | 1148.403 | 18.14   |

|          |          |          |          |          |          |          |          |         |
|----------|----------|----------|----------|----------|----------|----------|----------|---------|
| 17.93    | 1148.403 | 18.18    | 1148.403 | 18.18    | 1148.403 | 18.13705 | 1148.403 | 18.1456 |
| 17.93382 | 1148.403 | 18.18767 | 1148.403 | 18.18672 | 1148.403 | 18.14    | 1148.403 | 18.15   |
| 17.94    | 1148.403 | 18.19    | 1148.403 | 18.19    | 1148.403 | 18.14705 | 1148.403 | 18.1556 |
| 17.94382 | 1148.403 | 18.19767 | 1148.403 | 18.19672 | 1148.403 | 18.15    | 1148.403 | 18.16   |
| 17.95    | 1148.403 | 18.2     | 1148.403 | 18.2     | 1148.403 | 18.15705 | 1148.403 | 18.1656 |
| 17.95382 | 1148.403 | 18.20767 | 1148.403 | 18.20672 | 1148.403 | 18.16    | 1148.403 | 18.17   |
| 17.96    | 1148.403 | 18.21    | 1148.403 | 18.21    | 1148.403 | 18.16705 | 1148.403 | 18.1756 |
| 17.96382 | 1148.403 | 18.21767 | 1148.403 | 18.21672 | 1148.403 | 18.17    | 1148.403 | 18.18   |
| 17.97    | 1148.403 | 18.22    | 1148.403 | 18.22    | 1148.403 | 18.17705 | 1148.403 | 18.1856 |
| 17.97382 | 1148.403 | 18.22767 | 1148.403 | 18.22672 | 1148.403 | 18.18    | 1148.403 | 18.19   |
| 17.98    | 1148.403 | 18.23    | 1148.403 | 18.23    | 1148.403 | 18.18705 | 1148.403 | 18.1956 |
| 17.98382 | 1148.403 | 18.23767 | 1148.403 | 18.23672 | 1148.403 | 18.19    | 1148.403 | 18.2    |
| 17.99    | 1148.403 | 18.24    | 1148.403 | 18.24    | 1148.403 | 18.19705 | 1148.403 | 18.2056 |
| 17.99382 | 1148.403 | 18.24767 | 1148.403 | 18.24672 | 1148.403 | 18.2     | 1148.403 | 18.21   |
| 18       | 1148.403 | 18.25    | 1148.403 | 18.25    | 1148.403 | 18.20705 | 1148.403 | 18.2156 |
| 18.00382 | 1148.403 | 18.25767 | 1148.403 | 18.25672 | 1148.403 | 18.21    | 1148.403 | 18.22   |
| 18.01    | 1148.403 | 18.26    | 1148.403 | 18.26    | 1148.403 | 18.21705 | 1148.403 | 18.2256 |
| 18.01382 | 1148.403 | 18.26767 | 1148.403 | 18.26672 | 1148.403 | 18.22    | 1148.403 | 18.23   |
| 18.02    | 1148.403 | 18.27    | 1148.403 | 18.27    | 1148.403 | 18.22705 | 1148.403 | 18.2356 |
| 18.02382 | 1148.403 | 18.27767 | 1148.403 | 18.27672 | 1148.403 | 18.23    | 1148.403 | 18.24   |
| 18.03    | 1148.403 | 18.28    | 1148.403 | 18.28    | 1148.403 | 18.23705 | 1148.403 | 18.2456 |
| 18.03382 | 1148.403 | 18.28767 | 1148.403 | 18.28672 | 1148.403 | 18.24    | 1148.403 | 18.25   |
| 18.04    | 1148.403 | 18.29    | 1148.403 | 18.29    | 1148.403 | 18.24705 | 1148.403 | 18.2556 |
| 18.04382 | 1148.403 | 18.29767 | 1148.403 | 18.29672 | 1148.403 | 18.25    | 1148.403 | 18.26   |
| 18.05    | 1148.403 | 18.3     | 1148.403 | 18.3     | 1148.403 | 18.25705 | 1148.403 | 18.2656 |
| 18.05382 | 1148.403 | 18.30767 | 1148.403 | 18.30672 | 1148.403 | 18.26    | 1148.403 | 18.27   |
| 18.06    | 1148.403 | 18.31    | 1148.403 | 18.31    | 1148.403 | 18.26705 | 1148.403 | 18.2756 |
| 18.06382 | 1148.403 | 18.31767 | 1148.403 | 18.31672 | 1148.403 | 18.27    | 1148.403 | 18.28   |
| 18.07    | 1148.403 | 18.32    | 1148.403 | 18.32    | 1148.403 | 18.27705 | 1148.403 | 18.2856 |
| 18.07382 | 1148.403 | 18.32767 | 1148.403 | 18.32672 | 1148.403 | 18.28    | 1148.403 | 18.29   |
| 18.08    | 1148.403 | 18.33    | 1148.403 | 18.33    | 1148.403 | 18.28705 | 1148.403 | 18.2956 |
| 18.08382 | 1148.403 | 18.33767 | 1148.403 | 18.33672 | 1148.403 | 18.29    | 1148.403 | 18.3    |
| 18.09    | 1148.403 | 18.34    | 1148.403 | 18.34    | 1148.403 | 18.29705 | 1148.403 | 18.3056 |
| 18.09382 | 1148.403 | 18.34767 | 1148.403 | 18.34672 | 1148.403 | 18.3     | 1148.403 | 18.31   |
| 18.1     | 1148.403 | 18.35    | 1148.403 | 18.35    | 1148.403 | 18.30705 | 1148.403 | 18.3156 |
| 18.10382 | 1148.403 | 18.35767 | 1148.403 | 18.35672 | 1148.403 | 18.31    | 1148.403 | 18.32   |
| 18.11    | 1148.403 | 18.36    | 1148.403 | 18.36    | 1148.403 | 18.31705 | 1148.403 | 18.3256 |
| 18.11382 | 1148.403 | 18.36767 | 1148.403 | 18.36672 | 1148.403 | 18.32    | 1148.403 | 18.33   |
| 18.12    | 1148.403 | 18.37    | 1148.403 | 18.37    | 1148.403 | 18.32705 | 1148.403 | 18.3356 |
| 18.12382 | 1148.403 | 18.37767 | 1148.403 | 18.37672 | 1148.403 | 18.33    | 1148.403 | 18.34   |
| 18.13    | 1148.403 | 18.38    | 1148.403 | 18.38    | 1148.403 | 18.33705 | 1148.403 | 18.3456 |
| 18.13382 | 1148.403 | 18.38767 | 1148.403 | 18.38672 | 1148.403 | 18.34    | 1148.403 | 18.35   |
| 18.14    | 1148.403 | 18.39    | 1148.403 | 18.39    | 1148.403 | 18.34705 | 1148.403 | 18.3556 |
| 18.14382 | 1148.403 | 18.39767 | 1148.403 | 18.39672 | 1148.403 | 18.35    | 1148.403 | 18.36   |
| 18.15    | 1148.403 | 18.4     | 1148.403 | 18.4     | 1148.403 | 18.35705 | 1148.403 | 18.3656 |
| 18.15382 | 1148.403 | 18.40767 | 1148.403 | 18.40672 | 1148.403 | 18.36    | 1148.403 | 18.37   |
| 18.16    | 1148.403 | 18.41    | 1148.403 | 18.41    | 1148.403 | 18.36705 | 1148.403 | 18.3756 |

|          |          |          |          |          |          |          |          |         |
|----------|----------|----------|----------|----------|----------|----------|----------|---------|
| 18.16382 | 1148.403 | 18.41767 | 1148.403 | 18.41672 | 1148.403 | 18.37    | 1148.403 | 18.38   |
| 18.17    | 1148.403 | 18.42    | 1148.403 | 18.42    | 1148.403 | 18.37705 | 1148.403 | 18.3856 |
| 18.17382 | 1148.403 | 18.42767 | 1148.403 | 18.42672 | 1148.403 | 18.38    | 1148.403 | 18.39   |
| 18.18    | 1148.403 | 18.43    | 1148.403 | 18.43    | 1148.403 | 18.38705 | 1148.403 | 18.3956 |
| 18.18382 | 1148.403 | 18.43767 | 1148.403 | 18.43672 | 1148.403 | 18.39    | 1148.403 | 18.4    |
| 18.19    | 1148.403 | 18.44    | 1148.403 | 18.44    | 1148.403 | 18.39705 | 1148.403 | 18.4056 |
| 18.19382 | 1148.403 | 18.44767 | 1148.403 | 18.44672 | 1148.403 | 18.4     | 1148.403 | 18.41   |
| 18.2     | 1148.403 | 18.45    | 1148.403 | 18.45    | 1148.403 | 18.40705 | 1148.403 | 18.4156 |
| 18.20382 | 1148.403 | 18.45767 | 1148.403 | 18.45672 | 1148.403 | 18.41    | 1148.403 | 18.42   |
| 18.21    | 1148.403 | 18.46    | 1148.403 | 18.46    | 1148.403 | 18.41705 | 1148.403 | 18.4256 |
| 18.21382 | 1148.403 | 18.46767 | 1148.403 | 18.46672 | 1148.403 | 18.42    | 1148.403 | 18.43   |
| 18.22    | 1148.403 | 18.47    | 1148.403 | 18.47    | 1148.403 | 18.42705 | 1148.403 | 18.4356 |
| 18.22382 | 1148.403 | 18.47767 | 1148.403 | 18.47672 | 1148.403 | 18.43    | 1148.403 | 18.44   |
| 18.23    | 1148.403 | 18.48    | 1148.403 | 18.48    | 1148.403 | 18.43705 | 1148.403 | 18.4456 |
| 18.23382 | 1148.403 | 18.48767 | 1148.403 | 18.48672 | 1148.403 | 18.44    | 1148.403 | 18.45   |
| 18.24    | 1148.403 | 18.49    | 1148.403 | 18.49    | 1148.403 | 18.44705 | 1148.403 | 18.4556 |
| 18.24382 | 1148.403 | 18.49767 | 1148.403 | 18.49672 | 1148.403 | 18.45    | 1148.403 | 18.46   |
| 18.25    | 1148.403 | 18.5     | 1148.403 | 18.5     | 1148.403 | 18.45705 | 1148.403 | 18.4656 |
| 18.25382 | 1148.403 | 18.50767 | 1148.403 | 18.50672 | 1148.403 | 18.46    | 1148.403 | 18.47   |
| 18.26    | 1148.403 | 18.51    | 1148.403 | 18.51    | 1148.403 | 18.46705 | 1148.403 | 18.4756 |
| 18.26382 | 1148.403 | 18.51767 | 1148.403 | 18.51672 | 1148.403 | 18.47    | 1148.403 | 18.48   |
| 18.27    | 1148.403 | 18.52    | 1148.403 | 18.52    | 1148.403 | 18.47705 | 1148.403 | 18.4856 |
| 18.27382 | 1148.403 | 18.52767 | 1148.403 | 18.52672 | 1148.403 | 18.48    | 1148.403 | 18.49   |
| 18.28    | 1148.403 | 18.53    | 1148.403 | 18.53    | 1148.403 | 18.48705 | 1148.403 | 18.4956 |
| 18.28382 | 1148.403 | 18.53767 | 1148.403 | 18.53672 | 1148.403 | 18.49    | 1148.403 | 18.5    |
| 18.29    | 1148.403 | 18.54    | 1148.403 | 18.54    | 1148.403 | 18.49705 | 1148.403 | 18.5056 |
| 18.29382 | 1148.403 | 18.54767 | 1148.403 | 18.54672 | 1148.403 | 18.5     | 1148.403 | 18.51   |
| 18.3     | 1148.403 | 18.55    | 1148.403 | 18.55    | 1148.403 | 18.50705 | 1148.403 | 18.5156 |
| 18.30382 | 1148.403 | 18.55767 | 1148.403 | 18.55672 | 1148.403 | 18.51    | 1148.403 | 18.52   |
| 18.31    | 1148.403 | 18.56    | 1148.403 | 18.56    | 1148.403 | 18.51705 | 1148.403 | 18.5256 |
| 18.31382 | 1148.403 | 18.56767 | 1148.403 | 18.56672 | 1148.403 | 18.52    | 1148.403 | 18.53   |
| 18.32    | 1148.403 | 18.57    | 1148.403 | 18.57    | 1148.403 | 18.52705 | 1148.403 | 18.5356 |
| 18.32382 | 1148.403 | 18.57767 | 1148.403 | 18.57672 | 1148.403 | 18.53    | 1148.403 | 18.54   |
| 18.33    | 1148.403 | 18.58    | 1148.403 | 18.58    | 1148.403 | 18.53705 | 1148.403 | 18.5456 |
| 18.33382 | 1148.403 | 18.58767 | 1148.403 | 18.58672 | 1148.403 | 18.54    | 1148.403 | 18.55   |
| 18.34    | 1148.403 | 18.59    | 1148.403 | 18.59    | 1148.403 | 18.54705 | 1148.403 | 18.5556 |
| 18.34382 | 1148.403 | 18.59767 | 1148.403 | 18.59672 | 1148.403 | 18.55    | 1148.403 | 18.56   |
| 18.35    | 1148.403 | 18.6     | 1148.403 | 18.6     | 1148.403 | 18.55705 | 1148.403 | 18.5656 |
| 18.35382 | 1148.403 | 18.60767 | 1148.403 | 18.60672 | 1148.403 | 18.56    | 1148.403 | 18.57   |
| 18.36    | 1148.403 | 18.61    | 1148.403 | 18.61    | 1148.403 | 18.56705 | 1148.403 | 18.5756 |
| 18.36382 | 1148.403 | 18.61767 | 1148.403 | 18.61672 | 1148.403 | 18.57    | 1148.403 | 18.58   |
| 18.37    | 1148.403 | 18.62    | 1148.403 | 18.62    | 1148.403 | 18.57705 | 1148.403 | 18.5856 |
| 18.37382 | 1148.403 | 18.62767 | 1148.403 | 18.62672 | 1148.403 | 18.58    | 1148.403 | 18.59   |
| 18.38    | 1148.403 | 18.63    | 1148.403 | 18.63    | 1148.403 | 18.58705 | 1148.403 | 18.5956 |
| 18.38382 | 1148.403 | 18.63767 | 1148.403 | 18.63672 | 1148.403 | 18.59    | 1148.403 | 18.6    |
| 18.39    | 1148.403 | 18.64    | 1148.403 | 18.64    | 1148.403 | 18.59705 | 1148.403 | 18.6056 |
| 18.39382 | 1148.403 | 18.64767 | 1148.403 | 18.64672 | 1148.403 | 18.6     | 1148.403 | 18.61   |

|          |          |          |          |          |          |          |          |          |
|----------|----------|----------|----------|----------|----------|----------|----------|----------|
| 18.4     | 1148.403 | 18.65    | 1148.403 | 18.65    | 1148.403 | 18.60705 | 1148.403 | 18.6156  |
| 18.40382 | 1148.403 | 18.65767 | 1148.403 | 18.65672 | 1148.403 | 18.61    | 1148.403 | 18.62    |
| 18.41    | 1148.403 | 18.66    | 1148.403 | 18.66    | 1148.403 | 18.61705 | 1148.403 | 18.6256  |
| 18.41382 | 1148.403 | 18.66767 | 1148.403 | 18.66672 | 1148.403 | 18.62    | 1148.403 | 18.63    |
| 18.42    | 1148.403 | 18.67    | 1148.403 | 18.67    | 1148.403 | 18.62705 | 1148.403 | 18.6356  |
| 18.42382 | 1148.403 | 18.67767 | 1148.403 | 18.67672 | 1148.403 | 18.63    | 1148.403 | 18.64    |
| 18.43    | 1148.403 | 18.68    | 1148.403 | 18.68    | 1148.403 | 18.63705 | 1148.403 | 18.6456  |
| 18.43382 | 1148.403 | 18.68767 | 1148.403 | 18.68672 | 1148.403 | 18.64    | 1148.403 | 18.65    |
| 18.44    | 1148.403 | 18.69    | 1148.403 | 18.69    | 1148.403 | 18.64705 | 1148.403 | 18.6556  |
| 18.44382 | 1148.403 | 18.69767 | 1148.403 | 18.69672 | 1148.403 | 18.65    | 1148.403 | 18.66    |
| 18.45    | 1148.403 | 18.7     | 1148.403 | 18.7     | 1148.403 | 18.65705 | 1148.403 | 18.6656  |
| 18.45382 | 1148.403 | 18.70767 | 1148.403 | 18.70672 | 1148.403 | 18.66    | 1148.403 | 18.67    |
| 18.46    | 1148.403 | 18.71    | 1148.403 | 18.71    | 1148.403 | 18.66705 | 1148.403 | 18.6756  |
| 18.46382 | 1148.403 | 18.71767 | 1148.403 | 18.71672 | 1148.403 | 18.67    | 1148.403 | 18.68    |
| 18.47    | 1148.403 | 18.72    | 1148.403 | 18.72    | 1148.403 | 18.67705 | 1148.403 | 18.6856  |
| 18.47382 | 1148.403 | 18.72767 | 1148.403 | 18.72672 | 1148.403 | 18.68    | 1148.403 | 18.69    |
| 18.48    | 1148.403 | 18.73    | 1148.403 | 18.73    | 1148.403 | 18.68705 | 1148.403 | 18.6956  |
| 18.48382 | 1148.403 | 18.73767 | 1148.403 | 18.73672 | 1148.403 | 18.69    | 1148.403 | 18.7     |
| 18.49    | 1148.403 | 18.74    | 1148.403 | 18.7389  | 1148.403 | 18.69705 | 1148.403 | 18.7056  |
| 18.49382 | 1148.403 | 18.74767 | 1148.403 | 18.74    | 1148.403 | 18.7     | 1148.403 | 18.71    |
| 18.5     | 1148.403 | 18.75    | 1148.403 | 18.74218 | 1148.403 | 18.70705 | 1148.403 | 18.7156  |
| 18.50382 | 1148.403 | 18.75767 | 1148.403 | 18.75    | 1148.403 | 18.71    | 1148.403 | 18.72    |
| 18.51    | 1148.403 | 18.76    | 1148.403 | 18.75218 | 1148.403 | 18.71705 | 1148.403 | 18.7256  |
| 18.51382 | 1148.403 | 18.76767 | 1148.403 | 18.76    | 1148.403 | 18.72    | 1148.403 | 18.73    |
| 18.52    | 1148.403 | 18.77    | 1148.403 | 18.76218 | 1148.403 | 18.72705 | 1148.403 | 18.7356  |
| 18.52382 | 1148.403 | 18.77767 | 1148.403 | 18.77    | 1148.403 | 18.73    | 1148.403 | 18.74    |
| 18.53    | 1148.403 | 18.78    | 1148.403 | 18.77218 | 1148.403 | 18.73705 | 1148.403 | 18.7456  |
| 18.53382 | 1148.403 | 18.78767 | 1148.403 | 18.77623 | 1148.403 | 18.74    | 1148.403 | 18.75    |
| 18.54    | 1148.403 | 18.79    | 1148.403 | 18.78    | 1148.403 | 18.74705 | 1148.403 | 18.7556  |
| 18.54382 | 1148.403 | 18.79767 | 1148.403 | 18.78463 | 1148.403 | 18.75    | 1148.403 | 18.75786 |
| 18.55    | 1148.403 | 18.8     | 1148.403 | 18.79    | 1148.403 | 18.75705 | 1148.403 | 18.76    |
| 18.55382 | 1148.403 | 18.80767 | 1148.403 | 18.79463 | 1148.403 | 18.76    | 1148.403 | 18.76215 |
| 18.56    | 1148.403 | 18.81    | 1148.403 | 18.8     | 1148.403 | 18.76705 | 1148.403 | 18.77    |
| 18.56382 | 1148.403 | 18.81767 | 1148.403 | 18.80463 | 1148.403 | 18.77    | 1148.403 | 18.77215 |
| 18.57    | 1148.403 | 18.82    | 1148.403 | 18.81    | 1148.403 | 18.77705 | 1148.403 | 18.78    |
| 18.57382 | 1148.403 | 18.82767 | 1148.403 | 18.81463 | 1148.403 | 18.78    | 1148.403 | 18.78215 |
| 18.58    | 1148.403 | 18.83    | 1148.403 | 18.82    | 1148.403 | 18.78705 | 1148.403 | 18.79    |
| 18.58382 | 1148.403 | 18.83767 | 1148.403 | 18.82463 | 1148.403 | 18.79    | 1148.403 | 18.79215 |
| 18.59    | 1148.403 | 18.84    | 1148.403 | 18.83    | 1148.403 | 18.79705 | 1148.403 | 18.8     |
| 18.59382 | 1148.403 | 18.84767 | 1148.403 | 18.83463 | 1148.403 | 18.8     | 1148.403 | 18.80215 |
| 18.6     | 1148.403 | 18.85    | 1148.403 | 18.84    | 1148.403 | 18.80705 | 1148.403 | 18.80717 |
| 18.60382 | 1148.403 | 18.85767 | 1148.403 | 18.84463 | 1148.403 | 18.81    | 1148.403 | 18.81    |
| 18.61    | 1148.403 | 18.86    | 1148.403 | 18.85    | 1148.403 | 18.81705 | 1148.403 | 18.81573 |
| 18.61382 | 1148.403 | 18.86767 | 1148.403 | 18.85463 | 1148.403 | 18.82    | 1148.403 | 18.82    |
| 18.62    | 1148.403 | 18.87    | 1148.403 | 18.86    | 1148.403 | 18.82705 | 1148.403 | 18.82573 |
| 18.62382 | 1148.403 | 18.87767 | 1148.403 | 18.86463 | 1148.403 | 18.83    | 1148.403 | 18.83    |
| 18.63    | 1148.403 | 18.88    | 1148.403 | 18.87    | 1148.403 | 18.83705 | 1148.403 | 18.83573 |

|          |          |          |          |          |          |          |          |          |
|----------|----------|----------|----------|----------|----------|----------|----------|----------|
| 18.63382 | 1148.403 | 18.88767 | 1148.403 | 18.87463 | 1148.403 | 18.84    | 1148.403 | 18.84    |
| 18.64    | 1148.403 | 18.89    | 1148.403 | 18.88    | 1148.403 | 18.84705 | 1148.403 | 18.84573 |
| 18.64382 | 1148.403 | 18.89767 | 1148.403 | 18.88463 | 1148.403 | 18.85    | 1148.403 | 18.85    |
| 18.65    | 1148.403 | 18.9     | 1148.403 | 18.89    | 1148.403 | 18.85705 | 1148.403 | 18.85573 |
| 18.65382 | 1148.403 | 18.90767 | 1148.403 | 18.89463 | 1148.403 | 18.86    | 1148.403 | 18.86    |
| 18.66    | 1148.403 | 18.91    | 1148.403 | 18.9     | 1148.403 | 18.86705 | 1148.403 | 18.86573 |
| 18.66382 | 1148.403 | 18.91767 | 1148.403 | 18.90463 | 1148.403 | 18.87    | 1148.403 | 18.87    |
| 18.67    | 1148.403 | 18.92    | 1148.403 | 18.91    | 1148.403 | 18.87705 | 1148.403 | 18.87573 |
| 18.67382 | 1148.403 | 18.92767 | 1148.403 | 18.91463 | 1148.403 | 18.88    | 1148.403 | 18.88    |
| 18.68    | 1148.403 | 18.93    | 1148.403 | 18.92    | 1148.403 | 18.88705 | 1148.403 | 18.88573 |
| 18.68382 | 1148.403 | 18.93767 | 1148.403 | 18.92463 | 1148.403 | 18.89    | 1148.403 | 18.89    |
| 18.69    | 1148.403 | 18.94    | 1148.403 | 18.93    | 1148.403 | 18.89705 | 1148.403 | 18.89573 |
| 18.69382 | 1148.403 | 18.94767 | 1148.403 | 18.93463 | 1148.403 | 18.9     | 1148.403 | 18.9     |
| 18.7     | 1148.403 | 18.95    | 1148.403 | 18.94    | 1148.403 | 18.90705 | 1148.403 | 18.90573 |
| 18.70382 | 1148.403 | 18.95767 | 1148.403 | 18.94463 | 1148.403 | 18.91    | 1148.403 | 18.91    |
| 18.71    | 1148.403 | 18.96    | 1148.403 | 18.95    | 1148.403 | 18.91705 | 1148.403 | 18.91573 |
| 18.71382 | 1148.403 | 18.96767 | 1148.403 | 18.95463 | 1148.403 | 18.92    | 1148.403 | 18.92    |
| 18.72    | 1148.403 | 18.97    | 1148.403 | 18.96    | 1148.403 | 18.92705 | 1148.403 | 18.92573 |
| 18.72382 | 1148.403 | 18.97767 | 1148.403 | 18.96463 | 1148.403 | 18.93    | 1148.403 | 18.93    |
| 18.73    | 1148.403 | 18.98    | 1148.403 | 18.97    | 1148.403 | 18.93705 | 1148.403 | 18.93573 |
| 18.73382 | 1148.403 | 18.98767 | 1148.403 | 18.97463 | 1148.403 | 18.94    | 1148.403 | 18.94    |
| 18.74    | 1148.403 | 18.99    | 1148.403 | 18.98    | 1148.403 | 18.94705 | 1148.403 | 18.94573 |
| 18.74382 | 1148.403 | 18.99767 | 1148.403 | 18.98463 | 1148.403 | 18.95    | 1148.403 | 18.95    |
| 18.75    | 1148.403 | 19       | 1148.403 | 18.99    | 1148.403 | 18.95705 | 1148.403 | 18.95573 |
| 18.75382 | 1148.403 | 19.00767 | 1148.403 | 18.99463 | 1148.403 | 18.96    | 1148.403 | 18.96    |
| 18.76    | 1148.403 | 19.01    | 1148.403 | 19       | 1148.403 | 18.96705 | 1148.403 | 18.96573 |
| 18.76382 | 1148.403 | 19.01767 | 1148.403 | 19.00463 | 1148.403 | 18.97    | 1148.403 | 18.97    |
| 18.77    | 1148.403 | 19.02    | 1148.403 | 19.01    | 1148.403 | 18.97705 | 1148.403 | 18.97573 |
| 18.77382 | 1148.403 | 19.02767 | 1148.403 | 19.01463 | 1148.403 | 18.98    | 1148.403 | 18.98    |
| 18.78    | 1148.403 | 19.03    | 1148.403 | 19.02    | 1148.403 | 18.98705 | 1148.403 | 18.98573 |
| 18.78382 | 1148.403 | 19.03767 | 1148.403 | 19.02463 | 1148.403 | 18.99    | 1148.403 | 18.99    |
| 18.7852  | 1148.403 | 19.04    | 1148.403 | 19.03    | 1148.403 | 18.99705 | 1148.403 | 18.99573 |
| 18.79    | 1148.403 | 19.04767 | 1148.403 | 19.03463 | 1148.403 | 19       | 1148.403 | 19       |
| 18.79158 | 1148.403 | 19.05    | 1148.403 | 19.04    | 1148.403 | 19.00705 | 1148.403 | 19.00573 |
| 18.79311 | 1148.403 | 19.05709 | 1148.403 | 19.04463 | 1148.403 | 19.01    | 1148.403 | 19.01    |
| 18.8     | 1148.403 | 19.06    | 1148.403 | 19.05    | 1148.403 | 19.01705 | 1148.403 | 19.01573 |
| 18.80175 | 1148.403 | 19.061   | 1148.403 | 19.05463 | 1148.403 | 19.02    | 1148.403 | 19.02    |
| 18.81    | 1148.403 | 19.06713 | 1148.403 | 19.06    | 1148.403 | 19.02705 | 1148.403 | 19.02573 |
| 18.81175 | 1148.403 | 19.07    | 1148.403 | 19.06463 | 1148.403 | 19.03    | 1148.403 | 19.03    |
| 18.82    | 1148.403 | 19.07701 | 1148.403 | 19.07    | 1148.403 | 19.03705 | 1148.403 | 19.03573 |
| 18.82175 | 1148.403 | 19.08    | 1148.403 | 19.07463 | 1148.403 | 19.04    | 1148.403 | 19.04    |
| 18.83    | 1148.403 | 19.08701 | 1148.403 | 19.08    | 1148.403 | 19.04705 | 1148.403 | 19.04573 |
| 18.83175 | 1148.403 | 19.09    | 1148.403 | 19.08463 | 1148.403 | 19.05    | 1148.403 | 19.05    |
| 18.84    | 1148.403 | 19.09701 | 1148.403 | 19.09    | 1148.403 | 19.05705 | 1148.403 | 19.05573 |
| 18.84175 | 1148.403 | 19.1     | 1148.403 | 19.09463 | 1148.403 | 19.06    | 1148.403 | 19.06    |
| 18.85    | 1148.403 | 19.10701 | 1148.403 | 19.1     | 1148.403 | 19.06705 | 1148.403 | 19.06573 |
| 18.85175 | 1148.403 | 19.11    | 1148.403 | 19.10463 | 1148.403 | 19.07    | 1148.403 | 19.07    |

|          |          |          |          |          |          |          |          |          |
|----------|----------|----------|----------|----------|----------|----------|----------|----------|
| 18.86    | 1148.403 | 19.11701 | 1148.403 | 19.11    | 1148.403 | 19.07705 | 1148.403 | 19.07573 |
| 18.86175 | 1148.403 | 19.12    | 1148.403 | 19.11463 | 1148.403 | 19.08    | 1148.403 | 19.08    |
| 18.87    | 1148.403 | 19.12701 | 1148.403 | 19.12    | 1148.403 | 19.08705 | 1148.403 | 19.08573 |
| 18.87175 | 1148.403 | 19.13    | 1148.403 | 19.12463 | 1148.403 | 19.09    | 1148.403 | 19.09    |
| 18.88    | 1148.403 | 19.13701 | 1148.403 | 19.13    | 1148.403 | 19.09705 | 1148.403 | 19.09573 |
| 18.88175 | 1148.403 | 19.14    | 1148.403 | 19.13463 | 1148.403 | 19.1     | 1148.403 | 19.1     |
| 18.89    | 1148.403 | 19.14701 | 1148.403 | 19.14    | 1148.403 | 19.10705 | 1148.403 | 19.10573 |
| 18.89175 | 1148.403 | 19.15    | 1148.403 | 19.14463 | 1148.403 | 19.11    | 1148.403 | 19.11    |
| 18.9     | 1148.403 | 19.15701 | 1148.403 | 19.15    | 1148.403 | 19.11705 | 1148.403 | 19.11573 |
| 18.90175 | 1148.403 | 19.16    | 1148.403 | 19.15463 | 1148.403 | 19.12    | 1148.403 | 19.12    |
| 18.91    | 1148.403 | 19.16701 | 1148.403 | 19.16    | 1148.403 | 19.12705 | 1148.403 | 19.12573 |
| 18.91175 | 1148.403 | 19.17    | 1148.403 | 19.16463 | 1148.403 | 19.13    | 1148.403 | 19.13    |
| 18.92    | 1148.403 | 19.17701 | 1148.403 | 19.17    | 1148.403 | 19.13705 | 1148.403 | 19.13573 |
| 18.92175 | 1148.403 | 19.18    | 1148.403 | 19.17463 | 1148.403 | 19.14    | 1148.403 | 19.14    |
| 18.93    | 1148.403 | 19.18701 | 1148.403 | 19.18    | 1148.403 | 19.14705 | 1148.403 | 19.14573 |
| 18.93175 | 1148.403 | 19.19    | 1148.403 | 19.18463 | 1148.403 | 19.15    | 1148.403 | 19.15    |
| 18.94    | 1148.403 | 19.19701 | 1148.403 | 19.19    | 1148.403 | 19.15705 | 1148.403 | 19.15573 |
| 18.94175 | 1148.403 | 19.2     | 1148.403 | 19.19463 | 1148.403 | 19.16    | 1148.403 | 19.16    |
| 18.95    | 1148.403 | 19.20701 | 1148.403 | 19.2     | 1148.403 | 19.16705 | 1148.403 | 19.16573 |
| 18.95175 | 1148.403 | 19.21    | 1148.403 | 19.20463 | 1148.403 | 19.17    | 1148.403 | 19.17    |
| 18.96    | 1148.403 | 19.21701 | 1148.403 | 19.21    | 1148.403 | 19.17705 | 1148.403 | 19.17573 |
| 18.96175 | 1148.403 | 19.22    | 1148.403 | 19.21463 | 1148.403 | 19.18    | 1148.403 | 19.18    |
| 18.97    | 1148.403 | 19.22671 | 1148.403 | 19.22    | 1148.403 | 19.18705 | 1148.403 | 19.18573 |
| 18.97175 | 1148.403 | 19.23    | 1148.403 | 19.22463 | 1148.403 | 19.19    | 1148.403 | 19.19    |
| 18.98    | 1148.403 | 19.23678 | 1148.403 | 19.23    | 1148.403 | 19.19705 | 1148.403 | 19.19573 |
| 18.98175 | 1148.403 | 19.24    | 1148.403 | 19.23463 | 1148.403 | 19.2     | 1148.403 | 19.2     |
| 18.99    | 1148.403 | 19.24666 | 1148.403 | 19.24    | 1148.403 | 19.20705 | 1148.403 | 19.20573 |
| 18.99175 | 1148.403 | 19.25    | 1148.403 | 19.24463 | 1148.403 | 19.21    | 1148.403 | 19.21    |
| 19       | 1148.403 | 19.25666 | 1148.403 | 19.25    | 1148.403 | 19.21705 | 1148.403 | 19.21573 |
| 19.00175 | 1148.403 | 19.26    | 1148.403 | 19.25463 | 1148.403 | 19.22    | 1148.403 | 19.22    |
| 19.01    | 1148.403 | 19.26666 | 1148.403 | 19.26    | 1148.403 | 19.22705 | 1148.403 | 19.22573 |
| 19.01175 | 1148.403 | 19.27    | 1148.403 | 19.26463 | 1148.403 | 19.23    | 1148.403 | 19.23    |
| 19.02    | 1148.403 | 19.27666 | 1148.403 | 19.27    | 1148.403 | 19.23705 | 1148.403 | 19.23573 |
| 19.02175 | 1148.403 | 19.28    | 1148.403 | 19.27463 | 1148.403 | 19.24    | 1148.403 | 19.24    |
| 19.03    | 1148.403 | 19.28666 | 1148.403 | 19.28    | 1148.403 | 19.24705 | 1148.403 | 19.24573 |
| 19.03175 | 1148.403 | 19.29    | 1148.403 | 19.28463 | 1148.403 | 19.25    | 1148.403 | 19.25    |
| 19.04    | 1148.403 | 19.29666 | 1148.403 | 19.29    | 1148.403 | 19.25705 | 1148.403 | 19.25573 |
| 19.04175 | 1148.403 | 19.3     | 1148.403 | 19.29463 | 1148.403 | 19.26    | 1148.403 | 19.26    |
| 19.05    | 1148.403 | 19.30666 | 1148.403 | 19.3     | 1148.403 | 19.26705 | 1148.403 | 19.26573 |
| 19.05175 | 1148.403 | 19.31    | 1148.403 | 19.30463 | 1148.403 | 19.27    | 1148.403 | 19.27    |
| 19.06    | 1148.403 | 19.31666 | 1148.403 | 19.31    | 1148.403 | 19.27675 | 1148.403 | 19.27573 |
| 19.06175 | 1148.403 | 19.32    | 1148.403 | 19.31463 | 1148.403 | 19.28    | 1148.403 | 19.28    |
| 19.07    | 1148.403 | 19.32666 | 1148.403 | 19.32    | 1148.403 | 19.28682 | 1148.403 | 19.28573 |
| 19.07175 | 1148.403 | 19.33    | 1148.403 | 19.32463 | 1148.403 | 19.29    | 1148.403 | 19.29    |
| 19.08    | 1148.403 | 19.33666 | 1148.403 | 19.33    | 1148.403 | 19.2967  | 1148.403 | 19.29573 |
| 19.08175 | 1148.403 | 19.34    | 1148.403 | 19.33463 | 1148.403 | 19.3     | 1148.403 | 19.3     |
| 19.09    | 1148.403 | 19.34666 | 1148.403 | 19.34    | 1148.403 | 19.3067  | 1148.403 | 19.30573 |



|          |          |          |          |          |          |          |          |          |
|----------|----------|----------|----------|----------|----------|----------|----------|----------|
| 19.09175 | 1148.403 | 19.35    | 1148.403 | 19.34463 | 1148.403 | 19.30812 | 1148.403 | 19.31    |
| 19.1     | 1148.403 | 19.35666 | 1148.403 | 19.35    | 1148.403 | 19.30975 | 1148.403 | 19.31573 |
| 19.10175 | 1148.403 | 19.36    | 1148.403 | 19.35463 | 1148.403 | 19.31162 | 1148.403 | 19.32    |
| 19.11    | 1148.403 | 19.36666 | 1148.403 | 19.36    | 1148.403 | 19.32    | 1148.403 | 19.32573 |
| 19.11175 | 1148.403 | 19.37    | 1148.403 | 19.36463 | 1148.403 | 19.32162 | 1148.403 | 19.33    |
| 19.12    | 1148.403 | 19.37666 | 1148.403 | 19.37    | 1148.403 | 19.33    | 1148.403 | 19.33573 |
| 19.12175 | 1148.403 | 19.38    | 1148.403 | 19.37463 | 1148.403 | 19.33162 | 1148.403 | 19.34    |
| 19.13    | 1148.403 | 19.38666 | 1148.403 | 19.38    | 1148.403 | 19.34    | 1148.403 | 19.34573 |
| 19.13175 | 1148.403 | 19.39    | 1148.403 | 19.38463 | 1148.403 | 19.34162 | 1148.403 | 19.35    |
| 19.14    | 1148.403 | 19.39666 | 1148.403 | 19.39    | 1148.403 | 19.35    | 1148.403 | 19.35573 |
| 19.14175 | 1148.403 | 19.4     | 1148.403 | 19.39463 | 1148.403 | 19.35162 | 1148.403 | 19.36    |
| 19.15    | 1148.403 | 19.40666 | 1148.403 | 19.4     | 1148.403 | 19.36    | 1148.403 | 19.36573 |
| 19.15175 | 1148.403 | 19.41    | 1148.403 | 19.40463 | 1148.403 | 19.36162 | 1148.403 | 19.37    |
| 19.16    | 1148.403 | 19.41666 | 1148.403 | 19.41    | 1148.403 | 19.37    | 1148.403 | 19.37573 |
| 19.16175 | 1148.403 | 19.42    | 1148.403 | 19.41463 | 1148.403 | 19.37162 | 1148.403 | 19.38    |
| 19.17    | 1148.403 | 19.42666 | 1148.403 | 19.42    | 1148.403 | 19.38    | 1148.403 | 19.38573 |
| 19.17175 | 1148.403 | 19.43    | 1148.403 | 19.42463 | 1148.403 | 19.38162 | 1148.403 | 19.39    |
| 19.18    | 1148.403 | 19.43666 | 1148.403 | 19.43    | 1148.403 | 19.39    | 1148.403 | 19.39573 |
| 19.18175 | 1148.403 | 19.44    | 1148.403 | 19.43463 | 1148.403 | 19.39162 | 1148.403 | 19.4     |
| 19.19    | 1148.403 | 19.44666 | 1148.403 | 19.44    | 1148.403 | 19.4     | 1148.403 | 19.40573 |
| 19.19175 | 1148.403 | 19.45    | 1148.403 | 19.44463 | 1148.403 | 19.40162 | 1148.403 | 19.41    |
| 19.2     | 1148.403 | 19.45666 | 1148.403 | 19.45    | 1148.403 | 19.41    | 1148.403 | 19.41573 |
| 19.20175 | 1148.403 | 19.46    | 1148.403 | 19.45463 | 1148.403 | 19.41162 | 1148.403 | 19.42    |
| 19.21    | 1148.403 | 19.46666 | 1148.403 | 19.46    | 1148.403 | 19.42    | 1148.403 | 19.42573 |
| 19.21175 | 1148.403 | 19.47    | 1148.403 | 19.46463 | 1148.403 | 19.42162 | 1148.403 | 19.43    |
| 19.22    | 1148.403 | 19.47666 | 1148.403 | 19.47    | 1148.403 | 19.43    | 1148.403 | 19.43573 |
| 19.22175 | 1148.403 | 19.48    | 1148.403 | 19.47463 | 1148.403 | 19.43162 | 1148.403 | 19.44    |
| 19.23    | 1148.403 | 19.48666 | 1148.403 | 19.48    | 1148.403 | 19.44    | 1148.403 | 19.44573 |
| 19.23175 | 1148.403 | 19.49    | 1148.403 | 19.48463 | 1148.403 | 19.44162 | 1148.403 | 19.45    |
| 19.24    | 1148.403 | 19.49666 | 1148.403 | 19.49    | 1148.403 | 19.45    | 1148.403 | 19.45573 |
| 19.24175 | 1148.403 | 19.5     | 1148.403 | 19.49463 | 1148.403 | 19.45162 | 1148.403 | 19.46    |
| 19.25    | 1148.403 | 19.50666 | 1148.403 | 19.5     | 1148.403 | 19.46    | 1148.403 | 19.46573 |
| 19.25175 | 1148.403 | 19.51    | 1148.403 | 19.50463 | 1148.403 | 19.46162 | 1148.403 | 19.47    |
| 19.26    | 1148.403 | 19.51666 | 1148.403 | 19.51    | 1148.403 | 19.47    | 1148.403 | 19.47573 |
| 19.26175 | 1148.403 | 19.52    | 1148.403 | 19.51463 | 1148.403 | 19.47162 | 1148.403 | 19.48    |
| 19.27    | 1148.403 | 19.52666 | 1148.403 | 19.52    | 1148.403 | 19.48    | 1148.403 | 19.48573 |
| 19.27175 | 1148.403 | 19.53    | 1148.403 | 19.52463 | 1148.403 | 19.48162 | 1148.403 | 19.49    |
| 19.28    | 1148.403 | 19.53666 | 1148.403 | 19.53    | 1148.403 | 19.49    | 1148.403 | 19.49573 |
| 19.28175 | 1148.403 | 19.54    | 1148.403 | 19.53463 | 1148.403 | 19.49162 | 1148.403 | 19.5     |
| 19.29    | 1148.403 | 19.54666 | 1148.403 | 19.54    | 1148.403 | 19.5     | 1148.403 | 19.50573 |
| 19.29175 | 1148.403 | 19.55    | 1148.403 | 19.54463 | 1148.403 | 19.50162 | 1148.403 | 19.51    |
| 19.3     | 1148.403 | 19.55666 | 1148.403 | 19.55    | 1148.403 | 19.51    | 1148.403 | 19.51573 |
| 19.30175 | 1148.403 | 19.56    | 1148.403 | 19.55463 | 1148.403 | 19.51162 | 1148.403 | 19.52    |
| 19.31    | 1148.403 | 19.56666 | 1148.403 | 19.56    | 1148.403 | 19.52    | 1148.403 | 19.52573 |
| 19.31175 | 1148.403 | 19.57    | 1148.403 | 19.56463 | 1148.403 | 19.52162 | 1148.403 | 19.53    |
| 19.32    | 1148.403 | 19.57666 | 1148.403 | 19.57    | 1148.403 | 19.53    | 1148.403 | 19.53573 |
| 19.32175 | 1148.403 | 19.58    | 1148.403 | 19.57463 | 1148.403 | 19.53162 | 1148.403 | 19.54    |

|          |          |          |          |          |          |          |          |          |
|----------|----------|----------|----------|----------|----------|----------|----------|----------|
| 19.33    | 1148.403 | 19.58666 | 1148.403 | 19.58    | 1148.403 | 19.54    | 1148.403 | 19.54602 |
| 19.33175 | 1148.403 | 19.59    | 1148.403 | 19.58463 | 1148.403 | 19.54162 | 1148.403 | 19.55    |
| 19.34    | 1148.403 | 19.59666 | 1148.403 | 19.59    | 1148.403 | 19.55    | 1148.403 | 19.55112 |
| 19.34175 | 1148.403 | 19.6     | 1148.403 | 19.59463 | 1148.403 | 19.55162 | 1148.403 | 19.558   |
| 19.35    | 1148.403 | 19.60666 | 1148.403 | 19.6     | 1148.403 | 19.56    | 1148.403 | 19.56    |
| 19.35175 | 1148.403 | 19.61    | 1148.403 | 19.60463 | 1148.403 | 19.56162 | 1148.403 | 19.56786 |
| 19.36    | 1148.403 | 19.61666 | 1148.403 | 19.61    | 1148.403 | 19.57    | 1148.403 | 19.57    |
| 19.36175 | 1148.403 | 19.62    | 1148.403 | 19.61463 | 1148.403 | 19.57162 | 1148.403 | 19.57786 |
| 19.37    | 1148.403 | 19.62666 | 1148.403 | 19.62    | 1148.403 | 19.58    | 1148.403 | 19.58    |
| 19.37175 | 1148.403 | 19.63    | 1148.403 | 19.62463 | 1148.403 | 19.58162 | 1148.403 | 19.58786 |
| 19.38    | 1148.403 | 19.63666 | 1148.403 | 19.63    | 1148.403 | 19.59    | 1148.403 | 19.59    |
| 19.38175 | 1148.403 | 19.64    | 1148.403 | 19.63463 | 1148.403 | 19.59162 | 1148.403 | 19.59786 |
| 19.39    | 1148.403 | 19.64666 | 1148.403 | 19.64    | 1148.403 | 19.6     | 1148.403 | 19.6     |
| 19.39175 | 1148.403 | 19.65    | 1148.403 | 19.64463 | 1148.403 | 19.60162 | 1148.403 | 19.60786 |
| 19.4     | 1148.403 | 19.65666 | 1148.403 | 19.65    | 1148.403 | 19.61    | 1148.403 | 19.61    |
| 19.40175 | 1148.403 | 19.66    | 1148.403 | 19.65463 | 1148.403 | 19.61162 | 1148.403 | 19.61786 |
| 19.41    | 1148.403 | 19.66666 | 1148.403 | 19.66    | 1148.403 | 19.62    | 1148.403 | 19.62    |
| 19.41175 | 1148.403 | 19.67    | 1148.403 | 19.66463 | 1148.403 | 19.62162 | 1148.403 | 19.62786 |
| 19.42    | 1148.403 | 19.67666 | 1148.403 | 19.67    | 1148.403 | 19.63    | 1148.403 | 19.63    |
| 19.42175 | 1148.403 | 19.68    | 1148.403 | 19.67463 | 1148.403 | 19.63162 | 1148.403 | 19.63786 |
| 19.43    | 1148.403 | 19.68666 | 1148.403 | 19.68    | 1148.403 | 19.64    | 1148.403 | 19.64    |
| 19.43175 | 1148.403 | 19.69    | 1148.403 | 19.68463 | 1148.403 | 19.64162 | 1148.403 | 19.64786 |
| 19.44    | 1148.403 | 19.69666 | 1148.403 | 19.6857  | 1148.403 | 19.65    | 1148.403 | 19.65    |
| 19.44175 | 1148.403 | 19.7     | 1148.403 | 19.69    | 1148.403 | 19.65162 | 1148.403 | 19.65786 |
| 19.45    | 1148.403 | 19.70666 | 1148.403 | 19.69665 | 1148.403 | 19.66    | 1148.403 | 19.66    |
| 19.45175 | 1148.403 | 19.71    | 1148.403 | 19.69793 | 1148.403 | 19.66162 | 1148.403 | 19.66786 |
| 19.46    | 1148.403 | 19.71666 | 1148.403 | 19.7     | 1148.403 | 19.67    | 1148.403 | 19.67    |
| 19.46175 | 1148.403 | 19.72    | 1148.403 | 19.70146 | 1148.403 | 19.67162 | 1148.403 | 19.67786 |
| 19.47    | 1148.403 | 19.72666 | 1148.403 | 19.71    | 1148.403 | 19.68    | 1148.403 | 19.68    |
| 19.47175 | 1148.403 | 19.73    | 1148.403 | 19.71146 | 1148.403 | 19.68162 | 1148.403 | 19.68786 |
| 19.48    | 1148.403 | 19.73666 | 1148.403 | 19.72    | 1148.403 | 19.69    | 1148.403 | 19.69    |
| 19.48175 | 1148.403 | 19.74    | 1148.403 | 19.72146 | 1148.403 | 19.69162 | 1148.403 | 19.69786 |
| 19.49    | 1148.403 | 19.74666 | 1148.403 | 19.73    | 1148.403 | 19.7     | 1148.403 | 19.7     |
| 19.49175 | 1148.403 | 19.75    | 1148.403 | 19.73146 | 1148.403 | 19.70162 | 1148.403 | 19.70786 |
| 19.5     | 1148.403 | 19.75666 | 1148.403 | 19.74    | 1148.403 | 19.71    | 1148.403 | 19.71    |
| 19.50175 | 1148.403 | 19.76    | 1148.403 | 19.74146 | 1148.403 | 19.71162 | 1148.403 | 19.71786 |
| 19.51    | 1148.403 | 19.76666 | 1148.403 | 19.75    | 1148.403 | 19.72    | 1148.403 | 19.72    |
| 19.51175 | 1148.403 | 19.77    | 1148.403 | 19.75146 | 1148.403 | 19.72162 | 1148.403 | 19.72786 |
| 19.52    | 1148.403 | 19.77666 | 1148.403 | 19.76    | 1148.403 | 19.73    | 1148.403 | 19.73    |
| 19.52175 | 1148.403 | 19.78    | 1148.403 | 19.76146 | 1148.403 | 19.73162 | 1148.403 | 19.73786 |
| 19.53    | 1148.403 | 19.78666 | 1148.403 | 19.77    | 1148.403 | 19.74    | 1148.403 | 19.74    |
| 19.53175 | 1148.403 | 19.79    | 1148.403 | 19.77146 | 1148.403 | 19.74162 | 1148.403 | 19.74786 |
| 19.54    | 1148.403 | 19.79666 | 1148.403 | 19.7755  | 1148.403 | 19.75    | 1148.403 | 19.75    |
| 19.54175 | 1148.403 | 19.8     | 1148.403 | 19.78    | 1148.403 | 19.75162 | 1148.403 | 19.75786 |
| 19.55    | 1148.403 | 19.80666 | 1148.403 | 19.78367 | 1148.403 | 19.76    | 1148.403 | 19.76    |
| 19.55175 | 1148.403 | 19.81    | 1148.403 | 19.7848  | 1148.403 | 19.76162 | 1148.403 | 19.76786 |
| 19.56    | 1148.403 | 19.81666 | 1148.403 | 19.78799 | 1148.403 | 19.77    | 1148.403 | 19.77    |

|          |          |          |          |          |          |          |          |          |
|----------|----------|----------|----------|----------|----------|----------|----------|----------|
| 19.56175 | 1148.403 | 19.82    | 1148.403 | 19.79    | 1148.403 | 19.77162 | 1148.403 | 19.77786 |
| 19.57    | 1148.403 | 19.82666 | 1148.403 | 19.79388 | 1148.403 | 19.78    | 1148.403 | 19.78    |
| 19.57175 | 1148.403 | 19.83    | 1148.403 | 19.79753 | 1148.403 | 19.78162 | 1148.403 | 19.78786 |
| 19.58    | 1148.403 | 19.83666 | 1148.403 | 19.8     | 1148.403 | 19.79    | 1148.403 | 19.79    |
| 19.58175 | 1148.403 | 19.84    | 1148.403 | 19.80358 | 1148.403 | 19.79162 | 1148.403 | 19.79786 |
| 19.59    | 1148.403 | 19.84666 | 1148.403 | 19.81    | 1148.403 | 19.8     | 1148.403 | 19.8     |
| 19.59175 | 1148.403 | 19.85    | 1148.403 | 19.81358 | 1148.403 | 19.80162 | 1148.403 | 19.80786 |
| 19.6     | 1148.403 | 19.85666 | 1148.403 | 19.82    | 1148.403 | 19.81    | 1148.403 | 19.81    |
| 19.60175 | 1148.403 | 19.86    | 1148.403 | 19.82358 | 1148.403 | 19.81162 | 1148.403 | 19.81786 |
| 19.61    | 1148.403 | 19.86666 | 1148.403 | 19.83    | 1148.403 | 19.82    | 1148.403 | 19.82    |
| 19.61175 | 1148.403 | 19.87    | 1148.403 | 19.83358 | 1148.403 | 19.82162 | 1148.403 | 19.82786 |
| 19.62    | 1148.403 | 19.87666 | 1148.403 | 19.84    | 1148.403 | 19.83    | 1148.403 | 19.83    |
| 19.62175 | 1148.403 | 19.88    | 1148.403 | 19.84358 | 1148.403 | 19.83162 | 1148.403 | 19.83786 |
| 19.63    | 1148.403 | 19.88666 | 1148.403 | 19.85    | 1148.403 | 19.84    | 1148.403 | 19.84    |
| 19.63175 | 1148.403 | 19.89    | 1148.403 | 19.85358 | 1148.403 | 19.84162 | 1148.403 | 19.84786 |
| 19.63295 | 1148.403 | 19.89666 | 1148.403 | 19.86    | 1148.403 | 19.85    | 1148.403 | 19.85    |
| 19.63649 | 1148.403 | 19.9     | 1148.403 | 19.86358 | 1148.403 | 19.85162 | 1148.403 | 19.85786 |
| 19.64    | 1148.403 | 19.90666 | 1148.403 | 19.87    | 1148.403 | 19.86    | 1148.403 | 19.86    |
| 19.64405 | 1148.403 | 19.91    | 1148.403 | 19.87358 | 1148.403 | 19.86162 | 1148.403 | 19.86786 |
| 19.64768 | 1148.403 | 19.91666 | 1148.403 | 19.88    | 1148.403 | 19.87    | 1148.403 | 19.87    |
| 19.65    | 1148.403 | 19.92    | 1148.403 | 19.88358 | 1148.403 | 19.87162 | 1148.403 | 19.87786 |
| 19.65232 | 1148.403 | 19.92666 | 1148.403 | 19.89    | 1148.403 | 19.88    | 1148.403 | 19.88    |
| 19.66    | 1148.403 | 19.93    | 1148.403 | 19.89358 | 1148.403 | 19.88162 | 1148.403 | 19.88786 |
| 19.6622  | 1148.403 | 19.93666 | 1148.403 | 19.9     | 1148.403 | 19.89    | 1148.403 | 19.89    |
| 19.67    | 1148.403 | 19.94    | 1148.403 | 19.90358 | 1148.403 | 19.89162 | 1148.403 | 19.89786 |
| 19.6722  | 1148.403 | 19.94666 | 1148.403 | 19.91    | 1148.403 | 19.9     | 1148.403 | 19.9     |
| 19.68    | 1148.403 | 19.95    | 1148.403 | 19.91358 | 1148.403 | 19.90162 | 1148.403 | 19.90786 |
| 19.6822  | 1148.403 | 19.95666 | 1148.403 | 19.92    | 1148.403 | 19.91    | 1148.403 | 19.91    |
| 19.69    | 1148.403 | 19.96    | 1148.403 | 19.92358 | 1148.403 | 19.91162 | 1148.403 | 19.91786 |
| 19.6922  | 1148.403 | 19.96666 | 1148.403 | 19.93    | 1148.403 | 19.92    | 1148.403 | 19.92    |
| 19.7     | 1148.403 | 19.97    | 1148.403 | 19.93358 | 1148.403 | 19.92162 | 1148.403 | 19.92786 |
| 19.7022  | 1148.403 | 19.97666 | 1148.403 | 19.94    | 1148.403 | 19.93    | 1148.403 | 19.93    |
| 19.71    | 1148.403 | 19.98    | 1148.403 | 19.94358 | 1148.403 | 19.93162 | 1148.403 | 19.93786 |
| 19.7122  | 1148.403 | 19.98666 | 1148.403 | 19.95    | 1148.403 | 19.94    | 1148.403 | 19.94    |
| 19.72    | 1148.403 | 19.99    | 1148.403 | 19.95358 | 1148.403 | 19.94162 | 1148.403 | 19.94786 |
| 19.7222  | 1148.403 | 19.99666 | 1148.403 | 19.96    | 1148.403 | 19.95    | 1148.403 | 19.95    |
| 19.73    | 1148.403 | 20       | 1148.403 | 19.96358 | 1148.403 | 19.95162 | 1148.403 | 19.95786 |
| 19.7322  | 1148.403 |          |          | 19.97    | 1148.403 | 19.96    | 1148.403 | 19.96    |
| 19.74    | 1148.403 |          |          | 19.97358 | 1148.403 | 19.96162 | 1148.403 | 19.96786 |
| 19.7422  | 1148.403 |          |          | 19.98    | 1148.403 | 19.97    | 1148.403 | 19.97    |
| 19.75    | 1148.403 |          |          | 19.98358 | 1148.403 | 19.97162 | 1148.403 | 19.97786 |
| 19.7522  | 1148.403 |          |          | 19.99    | 1148.403 | 19.98    | 1148.403 | 19.98    |
| 19.76    | 1148.403 |          |          | 19.99358 | 1148.403 | 19.98162 | 1148.403 | 19.98786 |
| 19.7622  | 1148.403 |          |          | 20       | 1148.403 | 19.99    | 1148.403 | 19.99    |
| 19.77    | 1148.403 |          |          |          |          | 19.99162 | 1148.403 | 19.99786 |
| 19.7722  | 1148.403 |          |          |          |          | 20       | 1148.403 | 20       |
| 19.78    | 1148.403 |          |          |          |          |          |          |          |

|          |          |
|----------|----------|
| 19.7822  | 1148.403 |
| 19.79    | 1148.403 |
| 19.7922  | 1148.403 |
| 19.8     | 1148.403 |
| 19.8022  | 1148.403 |
| 19.81    | 1148.403 |
| 19.8122  | 1148.403 |
| 19.82    | 1148.403 |
| 19.8222  | 1148.403 |
| 19.83    | 1148.403 |
| 19.8322  | 1148.403 |
| 19.84    | 1148.403 |
| 19.8422  | 1148.403 |
| 19.85    | 1148.403 |
| 19.8522  | 1148.403 |
| 19.86    | 1148.403 |
| 19.8622  | 1148.403 |
| 19.87    | 1148.403 |
| 19.8722  | 1148.403 |
| 19.88    | 1148.403 |
| 19.8822  | 1148.403 |
| 19.88389 | 1148.403 |
| 19.89    | 1148.403 |
| 19.89146 | 1148.403 |
| 19.89643 | 1148.403 |
| 19.9     | 1148.403 |
| 19.90477 | 1148.403 |
| 19.90966 | 1148.403 |
| 19.91233 | 1148.403 |
| 19.92    | 1148.403 |
| 19.92198 | 1148.403 |
| 19.93    | 1148.403 |
| 19.93198 | 1148.403 |
| 19.94    | 1148.403 |
| 19.94198 | 1148.403 |
| 19.95    | 1148.403 |
| 19.95198 | 1148.403 |
| 19.96    | 1148.403 |
| 19.96198 | 1148.403 |
| 19.97    | 1148.403 |
| 19.97198 | 1148.403 |
| 19.98    | 1148.403 |
| 19.98198 | 1148.403 |
| 19.99    | 1148.403 |
| 19.99198 | 1148.403 |
| 20       | 1148.403 |



|              | L6:9.50s |              | L6:9.60s |              | L6:9.70s |              | L6:9.80s |              |
|--------------|----------|--------------|----------|--------------|----------|--------------|----------|--------------|
|              | L7:9.00s |              | L7:9.00s |              | L7:9.00s |              | L7:9.00s |              |
| J3.om<br>rpm | t<br>s   | J3.om<br>rpm | t<br>s   | J3.om<br>rpm | t<br>s   | J3.om<br>rpm | t<br>s   | J3.om<br>rpm |
| 1152.51      | 0        | 1152.51      | 0        | 1152.51      | 0        | 1152.51      | 0        | 1152.51      |
| 1152.51      | 0.006678 | 1152.51      | 0.006678 | 1152.51      | 0.006678 | 1152.51      | 0.006678 | 1152.51      |
| 1152.51      | 0.01     | 1152.51      | 0.01     | 1152.51      | 0.01     | 1152.51      | 0.01     | 1152.51      |
| 1152.51      | 0.016678 | 1152.51      | 0.016678 | 1152.51      | 0.016678 | 1152.51      | 0.016678 | 1152.51      |
| 1152.51      | 0.02     | 1152.51      | 0.02     | 1152.51      | 0.02     | 1152.51      | 0.02     | 1152.51      |
| 1152.51      | 0.026678 | 1152.51      | 0.026678 | 1152.51      | 0.026678 | 1152.51      | 0.026678 | 1152.51      |
| 1152.51      | 0.03     | 1152.51      | 0.03     | 1152.51      | 0.03     | 1152.51      | 0.03     | 1152.51      |
| 1152.51      | 0.036678 | 1152.51      | 0.036678 | 1152.51      | 0.036678 | 1152.51      | 0.036678 | 1152.51      |
| 1152.51      | 0.04     | 1152.51      | 0.04     | 1152.51      | 0.04     | 1152.51      | 0.04     | 1152.51      |
| 1152.51      | 0.046678 | 1152.51      | 0.046678 | 1152.51      | 0.046678 | 1152.51      | 0.046678 | 1152.51      |
| 1152.51      | 0.05     | 1152.51      | 0.05     | 1152.51      | 0.05     | 1152.51      | 0.05     | 1152.51      |
| 1152.51      | 0.056678 | 1152.51      | 0.056678 | 1152.51      | 0.056678 | 1152.51      | 0.056678 | 1152.51      |
| 1152.51      | 0.06     | 1152.51      | 0.06     | 1152.51      | 0.06     | 1152.51      | 0.06     | 1152.51      |
| 1152.51      | 0.066678 | 1152.51      | 0.066678 | 1152.51      | 0.066678 | 1152.51      | 0.066678 | 1152.51      |
| 1152.51      | 0.07     | 1152.51      | 0.07     | 1152.51      | 0.07     | 1152.51      | 0.07     | 1152.51      |
| 1152.51      | 0.076678 | 1152.51      | 0.076678 | 1152.51      | 0.076678 | 1152.51      | 0.076678 | 1152.51      |
| 1152.51      | 0.08     | 1152.51      | 0.08     | 1152.51      | 0.08     | 1152.51      | 0.08     | 1152.51      |
| 1152.51      | 0.086678 | 1152.51      | 0.086678 | 1152.51      | 0.086678 | 1152.51      | 0.086678 | 1152.51      |
| 1152.51      | 0.09     | 1152.51      | 0.09     | 1152.51      | 0.09     | 1152.51      | 0.09     | 1152.51      |
| 1152.51      | 0.096678 | 1152.51      | 0.096678 | 1152.51      | 0.096678 | 1152.51      | 0.096678 | 1152.51      |
| 1152.51      | 0.1      | 1152.51      | 0.1      | 1152.51      | 0.1      | 1152.51      | 0.1      | 1152.51      |
| 1152.51      | 0.106678 | 1152.51      | 0.106678 | 1152.51      | 0.106678 | 1152.51      | 0.106678 | 1152.51      |
| 1152.51      | 0.11     | 1152.51      | 0.11     | 1152.51      | 0.11     | 1152.51      | 0.11     | 1152.51      |
| 1152.51      | 0.116678 | 1152.51      | 0.116678 | 1152.51      | 0.116678 | 1152.51      | 0.116678 | 1152.51      |
| 1152.51      | 0.12     | 1152.51      | 0.12     | 1152.51      | 0.12     | 1152.51      | 0.12     | 1152.51      |
| 1152.51      | 0.126678 | 1152.51      | 0.126678 | 1152.51      | 0.126678 | 1152.51      | 0.126678 | 1152.51      |
| 1152.51      | 0.13     | 1152.51      | 0.13     | 1152.51      | 0.13     | 1152.51      | 0.13     | 1152.51      |
| 1152.51      | 0.136678 | 1152.51      | 0.136678 | 1152.51      | 0.136678 | 1152.51      | 0.136678 | 1152.51      |
| 1152.51      | 0.14     | 1152.51      | 0.14     | 1152.51      | 0.14     | 1152.51      | 0.14     | 1152.51      |
| 1152.51      | 0.146678 | 1152.51      | 0.146678 | 1152.51      | 0.146678 | 1152.51      | 0.146678 | 1152.51      |
| 1152.51      | 0.15     | 1152.51      | 0.15     | 1152.51      | 0.15     | 1152.51      | 0.15     | 1152.51      |
| 1152.51      | 0.156678 | 1152.51      | 0.156678 | 1152.51      | 0.156678 | 1152.51      | 0.156678 | 1152.51      |
| 1152.51      | 0.16     | 1152.51      | 0.16     | 1152.51      | 0.16     | 1152.51      | 0.16     | 1152.51      |
| 1152.51      | 0.166678 | 1152.51      | 0.166678 | 1152.51      | 0.166678 | 1152.51      | 0.166678 | 1152.51      |
| 1152.51      | 0.17     | 1152.51      | 0.17     | 1152.51      | 0.17     | 1152.51      | 0.17     | 1152.51      |
| 1152.51      | 0.176678 | 1152.51      | 0.176678 | 1152.51      | 0.176678 | 1152.51      | 0.176678 | 1152         |

[illegible]

[illegible]



[illegible]

[illegible]

[illegible]

[illegible]

[illegible]

[illegible]

[illegible]

[illegible]



[illegible]

[illegible]

[illegible]

[illegible]

|          |          |          |          |          |          |          |          |          |
|----------|----------|----------|----------|----------|----------|----------|----------|----------|
| 1152.51  | 9.037861 | 1152.51  | 9.037861 | 1152.51  | 9.037861 | 1152.51  | 9.037861 | 1152.51  |
| 1152.508 | 9.039282 | 1152.508 | 9.039282 | 1152.508 | 9.039282 | 1152.508 | 9.039282 | 1152.508 |
| 1152.505 | 9.040722 | 1152.505 | 9.040722 | 1152.505 | 9.040722 | 1152.505 | 9.040722 | 1152.505 |
| 1152.504 | 9.04175  | 1152.504 | 9.04175  | 1152.504 | 9.04175  | 1152.504 | 9.04175  | 1152.504 |
| 1152.504 | 9.042924 | 1152.504 | 9.042924 | 1152.504 | 9.042924 | 1152.504 | 9.042924 | 1152.504 |
| 1152.503 | 9.044098 | 1152.503 | 9.044098 | 1152.503 | 9.044098 | 1152.503 | 9.044098 | 1152.503 |
| 1152.501 | 9.045713 | 1152.501 | 9.045713 | 1152.501 | 9.045713 | 1152.501 | 9.045713 | 1152.501 |
| 1152.499 | 9.04674  | 1152.499 | 9.04674  | 1152.499 | 9.04674  | 1152.499 | 9.04674  | 1152.499 |
| 1152.498 | 9.047767 | 1152.498 | 9.047767 | 1152.498 | 9.047767 | 1152.498 | 9.047767 | 1152.498 |
| 1152.497 | 9.048795 | 1152.497 | 9.048795 | 1152.497 | 9.048795 | 1152.497 | 9.048795 | 1152.497 |
| 1152.496 | 9.05     | 1152.496 | 9.05     | 1152.496 | 9.05     | 1152.496 | 9.05     | 1152.496 |
| 1152.494 | 9.051397 | 1152.494 | 9.051397 | 1152.494 | 9.051397 | 1152.494 | 9.051397 | 1152.494 |
| 1152.492 | 9.052714 | 1152.492 | 9.052714 | 1152.492 | 9.052714 | 1152.492 | 9.052714 | 1152.492 |
| 1152.49  | 9.053867 | 1152.49  | 9.053867 | 1152.49  | 9.053867 | 1152.49  | 9.053867 | 1152.49  |
| 1152.488 | 9.05502  | 1152.488 | 9.05502  | 1152.488 | 9.05502  | 1152.488 | 9.05502  | 1152.488 |
| 1152.487 | 9.056172 | 1152.487 | 9.056172 | 1152.487 | 9.056172 | 1152.487 | 9.056172 | 1152.487 |
| 1152.484 | 9.05819  | 1152.484 | 9.05819  | 1152.484 | 9.05819  | 1152.484 | 9.05819  | 1152.484 |
| 1152.481 | 9.06     | 1152.481 | 9.06     | 1152.481 | 9.06     | 1152.481 | 9.06     | 1152.481 |
| 1152.479 | 9.061279 | 1152.479 | 9.061279 | 1152.479 | 9.061279 | 1152.479 | 9.061279 | 1152.479 |
| 1152.478 | 9.062339 | 1152.478 | 9.062339 | 1152.478 | 9.062339 | 1152.478 | 9.062339 | 1152.478 |
| 1152.475 | 9.064194 | 1152.475 | 9.064194 | 1152.475 | 9.064194 | 1152.475 | 9.064194 | 1152.475 |
| 1152.472 | 9.06626  | 1152.472 | 9.06626  | 1152.472 | 9.06626  | 1152.472 | 9.06626  | 1152.472 |
| 1152.469 | 9.068325 | 1152.469 | 9.068325 | 1152.469 | 9.068325 | 1152.469 | 9.068325 | 1152.469 |
| 1152.466 | 9.07     | 1152.466 | 9.07     | 1152.466 | 9.07     | 1152.466 | 9.07     | 1152.466 |
| 1152.464 | 9.071122 | 1152.464 | 9.071122 | 1152.464 | 9.071122 | 1152.464 | 9.071122 | 1152.464 |
| 1152.462 | 9.072312 | 1152.462 | 9.072312 | 1152.462 | 9.072312 | 1152.462 | 9.072312 | 1152.462 |
| 1152.459 | 9.074562 | 1152.459 | 9.074562 | 1152.459 | 9.074562 | 1152.459 | 9.074562 | 1152.459 |
| 1152.45  | 9.08     | 1152.45  | 9.08     | 1152.45  | 9.08     | 1152.45  | 9.08     | 1152.45  |
| 1152.446 | 9.082571 | 1152.446 | 9.082571 | 1152.446 | 9.082571 | 1152.446 | 9.082571 | 1152.446 |
| 1152.434 | 9.09     | 1152.434 | 9.09     | 1152.434 | 9.09     | 1152.434 | 9.09     | 1152.434 |
| 1152.43  | 9.092571 | 1152.43  | 9.092571 | 1152.43  | 9.092571 | 1152.43  | 9.092571 | 1152.43  |
| 1152.419 | 9.1      | 1152.419 | 9.1      | 1152.419 | 9.1      | 1152.419 | 9.1      | 1152.419 |
| 1152.415 | 9.102571 | 1152.415 | 9.102571 | 1152.415 | 9.102571 | 1152.415 | 9.102571 | 1152.415 |
| 1152.403 | 9.11     | 1152.403 | 9.11     | 1152.403 | 9.11     | 1152.403 | 9.11     | 1152.403 |
| 1152.399 | 9.112571 | 1152.399 | 9.112571 | 1152.399 | 9.112571 | 1152.399 | 9.112571 | 1152.399 |
| 1152.387 | 9.12     | 1152.387 | 9.12     | 1152.387 | 9.12     | 1152.387 | 9.12     | 1152.387 |
| 1152.383 | 9.122571 | 1152.383 | 9.122571 | 1152.383 | 9.122571 | 1152.383 | 9.122571 | 1152.383 |
| 1152.371 | 9.13     | 1152.371 | 9.13     | 1152.371 | 9.13     | 1152.371 | 9.13     | 1152.371 |
| 1152.367 | 9.132571 | 1152.367 | 9.132571 | 1152.367 | 9.132571 | 1152.367 | 9.132571 | 1152.367 |
| 1152.355 | 9.14     | 1152.355 | 9.14     | 1152.355 | 9.14     | 1152.355 | 9.14     | 1152.355 |
| 1152.351 | 9.142571 | 1152.351 | 9.142571 | 1152.351 | 9.142571 | 1152.351 | 9.142571 | 1152.351 |
| 1152.339 | 9.15     | 1152.339 | 9.15     | 1152.339 | 9.15     | 1152.339 | 9.15     | 1152.339 |
| 1152.334 | 9.152571 | 1152.334 | 9.152571 | 1152.334 | 9.152571 | 1152.334 | 9.152571 | 1152.334 |
| 1152.322 | 9.16     | 1152.322 | 9.16     | 1152.322 | 9.16     | 1152.322 | 9.16     | 1152.322 |
| 1152.318 | 9.162571 | 1152.318 | 9.162571 | 1152.318 | 9.162571 | 1152.318 | 9.162571 | 1152.318 |
| 1152.306 | 9.17     | 1152.306 | 9.17     | 1152.306 | 9.17     | 1152.306 | 9.17     | 1152.306 |
| 1152.302 | 9.172571 | 1152.302 | 9.172571 | 1152.302 | 9.172571 | 1152.302 | 9.172571 | 1152.302 |

|          |          |          |          |          |          |          |          |          |
|----------|----------|----------|----------|----------|----------|----------|----------|----------|
| 1152.29  | 9.18     | 1152.29  | 9.18     | 1152.29  | 9.18     | 1152.29  | 9.18     | 1152.29  |
| 1152.285 | 9.182571 | 1152.285 | 9.182571 | 1152.285 | 9.182571 | 1152.285 | 9.182571 | 1152.285 |
| 1152.273 | 9.19     | 1152.273 | 9.19     | 1152.273 | 9.19     | 1152.273 | 9.19     | 1152.273 |
| 1152.269 | 9.192571 | 1152.269 | 9.192571 | 1152.269 | 9.192571 | 1152.269 | 9.192571 | 1152.269 |
| 1152.257 | 9.2      | 1152.257 | 9.2      | 1152.257 | 9.2      | 1152.257 | 9.2      | 1152.257 |
| 1152.253 | 9.202571 | 1152.253 | 9.202571 | 1152.253 | 9.202571 | 1152.253 | 9.202571 | 1152.253 |
| 1152.24  | 9.21     | 1152.24  | 9.21     | 1152.24  | 9.21     | 1152.24  | 9.21     | 1152.24  |
| 1152.236 | 9.212571 | 1152.236 | 9.212571 | 1152.236 | 9.212571 | 1152.236 | 9.212571 | 1152.236 |
| 1152.224 | 9.22     | 1152.224 | 9.22     | 1152.224 | 9.22     | 1152.224 | 9.22     | 1152.224 |
| 1152.22  | 9.222571 | 1152.22  | 9.222571 | 1152.22  | 9.222571 | 1152.22  | 9.222571 | 1152.22  |
| 1152.208 | 9.23     | 1152.208 | 9.23     | 1152.208 | 9.23     | 1152.208 | 9.23     | 1152.208 |
| 1152.203 | 9.232571 | 1152.203 | 9.232571 | 1152.203 | 9.232571 | 1152.203 | 9.232571 | 1152.203 |
| 1152.191 | 9.24     | 1152.191 | 9.24     | 1152.191 | 9.24     | 1152.191 | 9.24     | 1152.191 |
| 1152.187 | 9.242571 | 1152.187 | 9.242571 | 1152.187 | 9.242571 | 1152.187 | 9.242571 | 1152.187 |
| 1152.175 | 9.25     | 1152.175 | 9.25     | 1152.175 | 9.25     | 1152.175 | 9.25     | 1152.175 |
| 1152.17  | 9.252571 | 1152.17  | 9.252571 | 1152.17  | 9.252571 | 1152.17  | 9.252571 | 1152.17  |
| 1152.158 | 9.26     | 1152.158 | 9.26     | 1152.158 | 9.26     | 1152.158 | 9.26     | 1152.158 |
| 1152.154 | 9.262571 | 1152.154 | 9.262571 | 1152.154 | 9.262571 | 1152.154 | 9.262571 | 1152.154 |
| 1152.142 | 9.27     | 1152.142 | 9.27     | 1152.142 | 9.27     | 1152.142 | 9.27     | 1152.142 |
| 1152.137 | 9.272571 | 1152.137 | 9.272571 | 1152.137 | 9.272571 | 1152.137 | 9.272571 | 1152.137 |
| 1152.125 | 9.28     | 1152.125 | 9.28     | 1152.125 | 9.28     | 1152.125 | 9.28     | 1152.125 |
| 1152.121 | 9.282571 | 1152.121 | 9.282571 | 1152.121 | 9.282571 | 1152.121 | 9.282571 | 1152.121 |
| 1152.109 | 9.29     | 1152.109 | 9.29     | 1152.109 | 9.29     | 1152.109 | 9.29     | 1152.109 |
| 1152.104 | 9.292571 | 1152.104 | 9.292571 | 1152.104 | 9.292571 | 1152.104 | 9.292571 | 1152.104 |
| 1152.092 | 9.3      | 1152.092 | 9.3      | 1152.092 | 9.3      | 1152.092 | 9.3      | 1152.092 |
| 1152.088 | 9.302571 | 1152.088 | 9.302571 | 1152.088 | 9.302571 | 1152.088 | 9.302571 | 1152.088 |
| 1152.076 | 9.31     | 1152.076 | 9.31     | 1152.076 | 9.31     | 1152.076 | 9.31     | 1152.076 |
| 1152.071 | 9.312571 | 1152.071 | 9.312571 | 1152.071 | 9.312571 | 1152.071 | 9.312571 | 1152.071 |
| 1152.059 | 9.32     | 1152.059 | 9.32     | 1152.059 | 9.32     | 1152.059 | 9.32     | 1152.059 |
| 1152.055 | 9.322571 | 1152.055 | 9.322571 | 1152.055 | 9.322571 | 1152.055 | 9.322571 | 1152.055 |
| 1152.043 | 9.33     | 1152.043 | 9.33     | 1152.043 | 9.33     | 1152.043 | 9.33     | 1152.043 |
| 1152.038 | 9.332571 | 1152.038 | 9.332571 | 1152.038 | 9.332571 | 1152.038 | 9.332571 | 1152.038 |
| 1152.026 | 9.34     | 1152.026 | 9.34     | 1152.026 | 9.34     | 1152.026 | 9.34     | 1152.026 |
| 1152.022 | 9.342571 | 1152.022 | 9.342571 | 1152.022 | 9.342571 | 1152.022 | 9.342571 | 1152.022 |
| 1152.01  | 9.35     | 1152.01  | 9.35     | 1152.01  | 9.35     | 1152.01  | 9.35     | 1152.01  |
| 1152.005 | 9.352571 | 1152.005 | 9.352571 | 1152.005 | 9.352571 | 1152.005 | 9.352571 | 1152.005 |
| 1151.993 | 9.36     | 1151.993 | 9.36     | 1151.993 | 9.36     | 1151.993 | 9.36     | 1151.993 |
| 1151.989 | 9.362571 | 1151.989 | 9.362571 | 1151.989 | 9.362571 | 1151.989 | 9.362571 | 1151.989 |
| 1151.977 | 9.37     | 1151.977 | 9.37     | 1151.977 | 9.37     | 1151.977 | 9.37     | 1151.977 |
| 1151.972 | 9.372571 | 1151.972 | 9.372571 | 1151.972 | 9.372571 | 1151.972 | 9.372571 | 1151.972 |
| 1151.96  | 9.38     | 1151.96  | 9.38     | 1151.96  | 9.38     | 1151.96  | 9.38     | 1151.96  |
| 1151.956 | 9.382571 | 1151.956 | 9.382571 | 1151.956 | 9.382571 | 1151.956 | 9.382571 | 1151.956 |
| 1151.944 | 9.39     | 1151.944 | 9.39     | 1151.944 | 9.39     | 1151.944 | 9.39     | 1151.944 |
| 1151.939 | 9.392571 | 1151.939 | 9.392571 | 1151.939 | 9.392571 | 1151.939 | 9.392571 | 1151.939 |
| 1151.928 | 9.4      | 1151.927 | 9.4      | 1151.927 | 9.4      | 1151.927 | 9.4      | 1151.927 |
| 1151.926 | 9.402571 | 1151.923 | 9.402571 | 1151.923 | 9.402571 | 1151.923 | 9.402571 | 1151.923 |
| 1151.923 | 9.41     | 1151.911 | 9.41     | 1151.911 | 9.41     | 1151.911 | 9.41     | 1151.911 |

|          |          |          |          |          |          |          |          |          |
|----------|----------|----------|----------|----------|----------|----------|----------|----------|
| 1151.922 | 9.412571 | 1151.906 | 9.412571 | 1151.906 | 9.412571 | 1151.906 | 9.412571 | 1151.906 |
| 1151.919 | 9.42     | 1151.894 | 9.42     | 1151.894 | 9.42     | 1151.894 | 9.42     | 1151.894 |
| 1151.916 | 9.422571 | 1151.89  | 9.422571 | 1151.89  | 9.422571 | 1151.89  | 9.422571 | 1151.89  |
| 1151.914 | 9.43     | 1151.878 | 9.43     | 1151.878 | 9.43     | 1151.878 | 9.43     | 1151.878 |
| 1151.911 | 9.432571 | 1151.873 | 9.432571 | 1151.873 | 9.432571 | 1151.873 | 9.432571 | 1151.873 |
| 1151.909 | 9.44     | 1151.861 | 9.44     | 1151.861 | 9.44     | 1151.861 | 9.44     | 1151.861 |
| 1151.905 | 9.442571 | 1151.857 | 9.442571 | 1151.857 | 9.442571 | 1151.857 | 9.442571 | 1151.857 |
| 1151.904 | 9.45     | 1151.845 | 9.45     | 1151.845 | 9.45     | 1151.845 | 9.45     | 1151.845 |
| 1151.902 | 9.452571 | 1151.84  | 9.452571 | 1151.84  | 9.452571 | 1151.84  | 9.452571 | 1151.84  |
| 1151.9   | 9.46     | 1151.828 | 9.46     | 1151.828 | 9.46     | 1151.828 | 9.46     | 1151.828 |
| 1151.898 | 9.462571 | 1151.824 | 9.462571 | 1151.824 | 9.462571 | 1151.824 | 9.462571 | 1151.824 |
| 1151.894 | 9.47     | 1151.811 | 9.47     | 1151.811 | 9.47     | 1151.811 | 9.47     | 1151.811 |
| 1151.892 | 9.472571 | 1151.807 | 9.472571 | 1151.807 | 9.472571 | 1151.807 | 9.472571 | 1151.807 |
| 1151.89  | 9.48     | 1151.795 | 9.48     | 1151.795 | 9.48     | 1151.795 | 9.48     | 1151.795 |
| 1151.887 | 9.482571 | 1151.791 | 9.482571 | 1151.791 | 9.482571 | 1151.791 | 9.482571 | 1151.791 |
| 1151.885 | 9.49     | 1151.778 | 9.49     | 1151.778 | 9.49     | 1151.778 | 9.49     | 1151.778 |
| 1151.883 | 9.492571 | 1151.774 | 9.492571 | 1151.774 | 9.492571 | 1151.774 | 9.492571 | 1151.774 |
| 1151.881 | 9.499732 | 1151.762 | 9.5      | 1151.762 | 9.5      | 1151.762 | 9.5      | 1151.762 |
| 1151.879 | 9.500827 | 1151.761 | 9.502571 | 1151.758 | 9.502571 | 1151.758 | 9.502571 | 1151.758 |
| 1151.877 | 9.50225  | 1151.758 | 9.51     | 1151.745 | 9.51     | 1151.745 | 9.51     | 1151.745 |
| 1151.874 | 9.503299 | 1151.756 | 9.512571 | 1151.741 | 9.512571 | 1151.741 | 9.512571 | 1151.741 |
| 1151.872 | 9.505134 | 1151.753 | 9.52     | 1151.729 | 9.52     | 1151.729 | 9.52     | 1151.729 |
| 1151.869 | 9.50674  | 1151.751 | 9.522571 | 1151.725 | 9.522571 | 1151.725 | 9.522571 | 1151.725 |
| 1151.867 | 9.508186 | 1151.748 | 9.53     | 1151.712 | 9.53     | 1151.712 | 9.53     | 1151.712 |
| 1151.864 | 9.509631 | 1151.746 | 9.532571 | 1151.708 | 9.532571 | 1151.708 | 9.532571 | 1151.708 |
| 1151.862 | 9.511242 | 1151.743 | 9.54     | 1151.696 | 9.54     | 1151.696 | 9.54     | 1151.696 |
| 1151.859 | 9.513132 | 1151.74  | 9.542571 | 1151.692 | 9.542571 | 1151.692 | 9.542571 | 1151.692 |
| 1151.856 | 9.514215 | 1151.738 | 9.55     | 1151.679 | 9.55     | 1151.679 | 9.55     | 1151.679 |
| 1151.852 | 9.515298 | 1151.737 | 9.552571 | 1151.675 | 9.552571 | 1151.675 | 9.552571 | 1151.675 |
| 1151.849 | 9.516381 | 1151.735 | 9.56     | 1151.663 | 9.56     | 1151.663 | 9.56     | 1151.663 |
| 1151.846 | 9.517464 | 1151.733 | 9.562571 | 1151.659 | 9.562571 | 1151.659 | 9.562571 | 1151.659 |
| 1151.844 | 9.52     | 1151.729 | 9.57     | 1151.646 | 9.57     | 1151.646 | 9.57     | 1151.646 |
| 1151.842 | 9.521331 | 1151.727 | 9.572571 | 1151.642 | 9.572571 | 1151.642 | 9.572571 | 1151.642 |
| 1151.84  | 9.522559 | 1151.725 | 9.58     | 1151.63  | 9.58     | 1151.63  | 9.58     | 1151.63  |
| 1151.837 | 9.523992 | 1151.722 | 9.582571 | 1151.626 | 9.582571 | 1151.626 | 9.582571 | 1151.626 |
| 1151.835 | 9.525246 | 1151.72  | 9.59     | 1151.613 | 9.59     | 1151.613 | 9.59     | 1151.613 |
| 1151.833 | 9.526661 | 1151.718 | 9.592571 | 1151.609 | 9.592571 | 1151.609 | 9.592571 | 1151.609 |
| 1151.829 | 9.528077 | 1151.716 | 9.599732 | 1151.597 | 9.6      | 1151.597 | 9.6      | 1151.597 |
| 1151.828 | 9.529077 | 1151.714 | 9.600827 | 1151.595 | 9.602571 | 1151.592 | 9.602571 | 1151.592 |
| 1151.825 | 9.530372 | 1151.712 | 9.60225  | 1151.593 | 9.61     | 1151.58  | 9.61     | 1151.58  |
| 1151.823 | 9.531862 | 1151.709 | 9.603299 | 1151.591 | 9.612571 | 1151.576 | 9.612571 | 1151.576 |
| 1151.821 | 9.5336   | 1151.706 | 9.605134 | 1151.588 | 9.62     | 1151.564 | 9.62     | 1151.564 |
| 1151.818 | 9.535019 | 1151.704 | 9.60674  | 1151.586 | 9.622571 | 1151.559 | 9.622571 | 1151.559 |
| 1151.814 | 9.536546 | 1151.702 | 9.608186 | 1151.583 | 9.63     | 1151.547 | 9.63     | 1151.547 |
| 1151.811 | 9.538074 | 1151.699 | 9.609631 | 1151.581 | 9.632571 | 1151.543 | 9.632571 | 1151.543 |
| 1151.81  | 9.539601 | 1151.697 | 9.611242 | 1151.578 | 9.64     | 1151.531 | 9.64     | 1151.531 |
| 1151.808 | 9.541084 | 1151.694 | 9.613132 | 1151.575 | 9.642571 | 1151.526 | 9.642571 | 1151.526 |

|          |          |          |          |          |          |          |          |          |
|----------|----------|----------|----------|----------|----------|----------|----------|----------|
| 1151.801 | 9.543011 | 1151.691 | 9.614215 | 1151.573 | 9.65     | 1151.514 | 9.65     | 1151.514 |
| 1151.797 | 9.545662 | 1151.687 | 9.615298 | 1151.571 | 9.652571 | 1151.51  | 9.652571 | 1151.51  |
| 1151.795 | 9.547349 | 1151.684 | 9.616381 | 1151.57  | 9.66     | 1151.498 | 9.66     | 1151.498 |
| 1151.79  | 9.549035 | 1151.681 | 9.617464 | 1151.568 | 9.662571 | 1151.493 | 9.662571 | 1151.493 |
| 1151.785 | 9.550241 | 1151.679 | 9.62     | 1151.564 | 9.67     | 1151.481 | 9.67     | 1151.481 |
| 1151.781 | 9.5517   | 1151.677 | 9.621331 | 1151.561 | 9.672571 | 1151.477 | 9.672571 | 1151.477 |
| 1151.778 | 9.553012 | 1151.674 | 9.622559 | 1151.559 | 9.68     | 1151.465 | 9.68     | 1151.465 |
| 1151.774 | 9.554817 | 1151.671 | 9.623992 | 1151.557 | 9.682571 | 1151.46  | 9.682571 | 1151.46  |
| 1151.77  | 9.555966 | 1151.669 | 9.625246 | 1151.555 | 9.69     | 1151.448 | 9.69     | 1151.448 |
| 1151.767 | 9.557114 | 1151.668 | 9.626661 | 1151.553 | 9.692571 | 1151.444 | 9.692571 | 1151.444 |
| 1151.764 | 9.559124 | 1151.664 | 9.628077 | 1151.55  | 9.699732 | 1151.432 | 9.7      | 1151.431 |
| 1151.761 | 9.560287 | 1151.662 | 9.629077 | 1151.549 | 9.700827 | 1151.43  | 9.702571 | 1151.427 |
| 1151.758 | 9.561663 | 1151.66  | 9.630372 | 1151.547 | 9.70225  | 1151.428 | 9.71     | 1151.415 |
| 1151.755 | 9.563011 | 1151.658 | 9.631862 | 1151.544 | 9.703299 | 1151.426 | 9.712571 | 1151.411 |
| 1151.751 | 9.564191 | 1151.656 | 9.6336   | 1151.541 | 9.705134 | 1151.423 | 9.72     | 1151.398 |
| 1151.748 | 9.566255 | 1151.652 | 9.635019 | 1151.539 | 9.70674  | 1151.42  | 9.722571 | 1151.394 |
| 1151.745 | 9.568319 | 1151.649 | 9.636546 | 1151.536 | 9.708186 | 1151.418 | 9.73     | 1151.382 |
| 1151.742 | 9.57     | 1151.646 | 9.638074 | 1151.534 | 9.709631 | 1151.416 | 9.732571 | 1151.378 |
| 1151.739 | 9.571146 | 1151.644 | 9.639601 | 1151.531 | 9.711242 | 1151.413 | 9.74     | 1151.365 |
| 1151.736 | 9.572285 | 1151.643 | 9.641084 | 1151.529 | 9.713132 | 1151.41  | 9.742571 | 1151.361 |
| 1151.732 | 9.576312 | 1151.636 | 9.643011 | 1151.526 | 9.714215 | 1151.408 | 9.75     | 1151.349 |
| 1151.729 | 9.578999 | 1151.631 | 9.645662 | 1151.521 | 9.715298 | 1151.406 | 9.752571 | 1151.345 |
| 1151.725 | 9.58     | 1151.63  | 9.647349 | 1151.518 | 9.716381 | 1151.404 | 9.76     | 1151.332 |
| 1151.722 | 9.583071 | 1151.625 | 9.649035 | 1151.516 | 9.717464 | 1151.403 | 9.762571 | 1151.328 |
| 1151.72  | 9.585757 | 1151.62  | 9.650241 | 1151.514 | 9.72     | 1151.398 | 9.77     | 1151.316 |
| 1151.717 | 9.588175 | 1151.616 | 9.6517   | 1151.511 | 9.721331 | 1151.396 | 9.772571 | 1151.312 |
| 1151.712 | 9.59     | 1151.613 | 9.653012 | 1151.509 | 9.722559 | 1151.394 | 9.78     | 1151.299 |
| 1151.709 | 9.592764 | 1151.609 | 9.654817 | 1151.506 | 9.723992 | 1151.392 | 9.782571 | 1151.295 |
| 1151.706 | 9.59486  | 1151.605 | 9.655966 | 1151.504 | 9.725246 | 1151.39  | 9.79     | 1151.283 |
| 1151.704 | 9.596957 | 1151.602 | 9.657114 | 1151.502 | 9.726661 | 1151.387 | 9.792571 | 1151.278 |
| 1151.701 | 9.599054 | 1151.598 | 9.659124 | 1151.499 | 9.728077 | 1151.385 | 9.799732 | 1151.267 |
| 1151.696 | 9.6003   | 1151.596 | 9.660287 | 1151.497 | 9.729081 | 1151.383 | 9.800827 | 1151.265 |
| 1151.693 | 9.602396 | 1151.593 | 9.661663 | 1151.495 | 9.730401 | 1151.381 | 9.80225  | 1151.262 |
| 1151.69  | 9.604376 | 1151.589 | 9.663011 | 1151.493 | 9.731897 | 1151.379 | 9.803299 | 1151.261 |
| 1151.688 | 9.606355 | 1151.586 | 9.664191 | 1151.491 | 9.733641 | 1151.376 | 9.805134 | 1151.258 |
| 1151.685 | 9.608334 | 1151.583 | 9.666255 | 1151.487 | 9.735063 | 1151.374 | 9.80674  | 1151.255 |
| 1151.679 | 9.61     | 1151.58  | 9.668319 | 1151.484 | 9.736592 | 1151.371 | 9.808186 | 1151.253 |
| 1151.676 | 9.612262 | 1151.576 | 9.67     | 1151.481 | 9.738121 | 1151.368 | 9.809631 | 1151.25  |
| 1151.674 | 9.614132 | 1151.573 | 9.671146 | 1151.479 | 9.739651 | 1151.366 | 9.811242 | 1151.248 |
| 1151.672 | 9.616001 | 1151.57  | 9.672285 | 1151.477 | 9.741084 | 1151.364 | 9.813132 | 1151.244 |
| 1151.669 | 9.617871 | 1151.567 | 9.676312 | 1151.471 | 9.743012 | 1151.36  | 9.814215 | 1151.243 |
| 1151.663 | 9.62     | 1151.564 | 9.678999 | 1151.466 | 9.745663 | 1151.356 | 9.815298 | 1151.241 |
| 1151.66  | 9.622137 | 1151.56  | 9.68     | 1151.465 | 9.747351 | 1151.353 | 9.816381 | 1151.239 |
| 1151.658 | 9.623898 | 1151.557 | 9.683071 | 1151.459 | 9.749038 | 1151.35  | 9.817464 | 1151.237 |
| 1151.656 | 9.62566  | 1151.554 | 9.685757 | 1151.455 | 9.750241 | 1151.348 | 9.82     | 1151.233 |
| 1151.653 | 9.627421 | 1151.551 | 9.688175 | 1151.451 | 9.7517   | 1151.346 | 9.821331 | 1151.231 |
| 1151.646 | 9.63     | 1151.547 | 9.69     | 1151.448 | 9.753012 | 1151.344 | 9.822559 | 1151.229 |



|          |          |          |          |          |          |          |          |          |
|----------|----------|----------|----------|----------|----------|----------|----------|----------|
| 1151.644 | 9.632013 | 1151.544 | 9.692764 | 1151.443 | 9.754817 | 1151.341 | 9.823992 | 1151.227 |
| 1151.642 | 9.633668 | 1151.541 | 9.69486  | 1151.44  | 9.755965 | 1151.339 | 9.825246 | 1151.224 |
| 1151.64  | 9.635323 | 1151.538 | 9.696957 | 1151.436 | 9.757114 | 1151.337 | 9.826661 | 1151.222 |
| 1151.638 | 9.636978 | 1151.536 | 9.699054 | 1151.433 | 9.759124 | 1151.334 | 9.828077 | 1151.22  |
| 1151.63  | 9.64     | 1151.531 | 9.7003   | 1151.431 | 9.760287 | 1151.332 | 9.829077 | 1151.218 |
| 1151.628 | 9.641891 | 1151.527 | 9.702396 | 1151.427 | 9.761663 | 1151.33  | 9.830372 | 1151.216 |
| 1151.626 | 9.643441 | 1151.525 | 9.704376 | 1151.424 | 9.763011 | 1151.327 | 9.831862 | 1151.213 |
| 1151.624 | 9.644991 | 1151.522 | 9.706355 | 1151.421 | 9.76419  | 1151.325 | 9.8336   | 1151.211 |
| 1151.621 | 9.646541 | 1151.52  | 9.708334 | 1151.418 | 9.766255 | 1151.322 | 9.835019 | 1151.208 |
| 1151.619 | 9.65     | 1151.514 | 9.71     | 1151.415 | 9.768319 | 1151.319 | 9.836546 | 1151.206 |
| 1151.617 | 9.651771 | 1151.511 | 9.712262 | 1151.411 | 9.77     | 1151.316 | 9.838074 | 1151.203 |
| 1151.614 | 9.653218 | 1151.509 | 9.714132 | 1151.408 | 9.771146 | 1151.314 | 9.839601 | 1151.201 |
| 1151.61  | 9.654665 | 1151.506 | 9.716001 | 1151.405 | 9.772284 | 1151.312 | 9.841084 | 1151.198 |
| 1151.608 | 9.656112 | 1151.504 | 9.717871 | 1151.402 | 9.776312 | 1151.305 | 9.843011 | 1151.195 |
| 1151.606 | 9.66     | 1151.498 | 9.72     | 1151.398 | 9.778998 | 1151.301 | 9.845662 | 1151.191 |
| 1151.604 | 9.661654 | 1151.495 | 9.722137 | 1151.395 | 9.78     | 1151.299 | 9.847349 | 1151.188 |
| 1151.602 | 9.663    | 1151.493 | 9.723898 | 1151.392 | 9.783071 | 1151.294 | 9.849035 | 1151.185 |
| 1151.597 | 9.664346 | 1151.49  | 9.72566  | 1151.389 | 9.785757 | 1151.29  | 9.850241 | 1151.183 |
| 1151.594 | 9.665693 | 1151.488 | 9.727421 | 1151.386 | 9.788175 | 1151.286 | 9.8517   | 1151.181 |
| 1151.592 | 9.67     | 1151.481 | 9.73     | 1151.382 | 9.79     | 1151.283 | 9.853012 | 1151.179 |
| 1151.591 | 9.671539 | 1151.478 | 9.732013 | 1151.379 | 9.792764 | 1151.278 | 9.854817 | 1151.176 |
| 1151.589 | 9.672787 | 1151.476 | 9.733668 | 1151.376 | 9.79486  | 1151.275 | 9.855966 | 1151.174 |
| 1151.587 | 9.674036 | 1151.474 | 9.735323 | 1151.373 | 9.796957 | 1151.271 | 9.857114 | 1151.172 |
| 1151.58  | 9.675285 | 1151.472 | 9.736978 | 1151.37  | 9.799054 | 1151.268 | 9.859124 | 1151.168 |
| 1151.578 | 9.679655 | 1151.465 | 9.74     | 1151.365 | 9.8003   | 1151.266 | 9.860287 | 1151.167 |
| 1151.576 | 9.68121  | 1151.463 | 9.741891 | 1151.362 | 9.802396 | 1151.262 | 9.861663 | 1151.164 |
| 1151.573 | 9.682234 | 1151.461 | 9.743441 | 1151.36  | 9.804376 | 1151.259 | 9.863011 | 1151.162 |
| 1151.566 | 9.683258 | 1151.459 | 9.744991 | 1151.357 | 9.806355 | 1151.256 | 9.864191 | 1151.16  |
| 1151.564 | 9.68505  | 1151.456 | 9.746541 | 1151.355 | 9.808334 | 1151.252 | 9.866255 | 1151.157 |
| 1151.561 | 9.686522 | 1151.454 | 9.75     | 1151.349 | 9.81     | 1151.25  | 9.868319 | 1151.153 |
| 1151.558 | 9.687993 | 1151.451 | 9.751771 | 1151.346 | 9.812262 | 1151.246 | 9.87     | 1151.15  |
| 1151.556 | 9.689465 | 1151.449 | 9.753218 | 1151.343 | 9.814132 | 1151.243 | 9.871146 | 1151.149 |
| 1151.554 | 9.691682 | 1151.445 | 9.754665 | 1151.341 | 9.816001 | 1151.24  | 9.872285 | 1151.147 |
| 1151.552 | 9.693153 | 1151.443 | 9.756112 | 1151.339 | 9.817871 | 1151.237 | 9.876312 | 1151.14  |
| 1151.549 | 9.694374 | 1151.441 | 9.76     | 1151.332 | 9.82     | 1151.233 | 9.878999 | 1151.136 |
| 1151.547 | 9.695595 | 1151.439 | 9.761654 | 1151.33  | 9.822137 | 1151.23  | 9.88     | 1151.134 |
| 1151.545 | 9.696815 | 1151.437 | 9.763    | 1151.327 | 9.823898 | 1151.227 | 9.883071 | 1151.129 |
| 1151.543 | 9.7      | 1151.431 | 9.764346 | 1151.325 | 9.82566  | 1151.224 | 9.885757 | 1151.124 |
| 1151.54  | 9.701395 | 1151.429 | 9.765693 | 1151.323 | 9.827421 | 1151.221 | 9.888175 | 1151.12  |
| 1151.538 | 9.702616 | 1151.427 | 9.77     | 1151.316 | 9.83     | 1151.217 | 9.89     | 1151.117 |
| 1151.536 | 9.703715 | 1151.425 | 9.771539 | 1151.313 | 9.832013 | 1151.213 | 9.892764 | 1151.113 |
| 1151.531 | 9.704813 | 1151.424 | 9.772787 | 1151.311 | 9.833668 | 1151.211 | 9.89486  | 1151.109 |
| 1151.528 | 9.705912 | 1151.422 | 9.774036 | 1151.309 | 9.835323 | 1151.208 | 9.896957 | 1151.106 |
| 1151.514 | 9.71     | 1151.415 | 9.775285 | 1151.307 | 9.836978 | 1151.205 | 9.899054 | 1151.102 |
| 1151.512 | 9.711256 | 1151.413 | 9.779655 | 1151.3   | 9.84     | 1151.2   | 9.9003   | 1151.1   |
| 1151.498 | 9.712354 | 1151.411 | 9.78121  | 1151.297 | 9.841891 | 1151.197 | 9.902396 | 1151.097 |
| 1151.495 | 9.714332 | 1151.408 | 9.782234 | 1151.296 | 9.843441 | 1151.194 | 9.904376 | 1151.094 |

|          |          |          |          |          |          |          |          |          |
|----------|----------|----------|----------|----------|----------|----------|----------|----------|
| 1151.481 | 9.718499 | 1151.401 | 9.783258 | 1151.294 | 9.844991 | 1151.192 | 9.906355 | 1151.09  |
| 1151.478 | 9.72     | 1151.398 | 9.78505  | 1151.291 | 9.846541 | 1151.189 | 9.908334 | 1151.087 |
| 1151.465 | 9.721625 | 1151.396 | 9.786522 | 1151.288 | 9.85     | 1151.184 | 9.91     | 1151.084 |
| 1151.462 | 9.723674 | 1151.392 | 9.787993 | 1151.286 | 9.851771 | 1151.181 | 9.912262 | 1151.081 |
| 1151.448 | 9.724751 | 1151.391 | 9.789465 | 1151.284 | 9.853218 | 1151.178 | 9.914132 | 1151.077 |
| 1151.445 | 9.725828 | 1151.389 | 9.791682 | 1151.28  | 9.854665 | 1151.176 | 9.916001 | 1151.074 |
| 1151.431 | 9.726905 | 1151.387 | 9.793153 | 1151.277 | 9.856112 | 1151.173 | 9.917871 | 1151.071 |
| 1151.429 | 9.728789 | 1151.384 | 9.794374 | 1151.275 | 9.86     | 1151.167 | 9.92     | 1151.068 |
| 1151.415 | 9.73     | 1151.382 | 9.795595 | 1151.273 | 9.861654 | 1151.164 | 9.922137 | 1151.064 |
| 1151.412 | 9.731218 | 1151.38  | 9.796815 | 1151.271 | 9.863    | 1151.162 | 9.923898 | 1151.061 |
| 1151.398 | 9.732275 | 1151.378 | 9.8      | 1151.266 | 9.864346 | 1151.16  | 9.92566  | 1151.058 |
| 1151.396 | 9.734039 | 1151.375 | 9.801395 | 1151.264 | 9.865693 | 1151.158 | 9.927421 | 1151.056 |
| 1151.382 | 9.735295 | 1151.373 | 9.802616 | 1151.262 | 9.87     | 1151.15  | 9.93     | 1151.051 |
| 1151.379 | 9.736663 | 1151.371 | 9.803715 | 1151.26  | 9.871539 | 1151.148 | 9.932013 | 1151.048 |
| 1151.365 | 9.74     | 1151.365 | 9.804813 | 1151.258 | 9.872787 | 1151.146 | 9.933668 | 1151.045 |
| 1151.363 | 9.741563 | 1151.363 | 9.805912 | 1151.256 | 9.874036 | 1151.144 | 9.935323 | 1151.042 |
| 1151.349 | 9.75     | 1151.349 | 9.81     | 1151.25  | 9.875285 | 1151.142 | 9.936978 | 1151.04  |
| 1151.346 | 9.751563 | 1151.346 | 9.811256 | 1151.248 | 9.879655 | 1151.134 | 9.94     | 1151.035 |
| 1151.332 | 9.76     | 1151.332 | 9.812354 | 1151.246 | 9.88121  | 1151.132 | 9.941891 | 1151.032 |
| 1151.33  | 9.761563 | 1151.33  | 9.814332 | 1151.242 | 9.882234 | 1151.13  | 9.943441 | 1151.029 |
| 1151.316 | 9.77     | 1151.316 | 9.818499 | 1151.236 | 9.883258 | 1151.129 | 9.944991 | 1151.026 |
| 1151.313 | 9.771563 | 1151.313 | 9.82     | 1151.233 | 9.88505  | 1151.126 | 9.946541 | 1151.024 |
| 1151.299 | 9.78     | 1151.299 | 9.821625 | 1151.23  | 9.886522 | 1151.123 | 9.95     | 1151.018 |
| 1151.297 | 9.781563 | 1151.297 | 9.823674 | 1151.227 | 9.887993 | 1151.121 | 9.951771 | 1151.015 |
| 1151.283 | 9.79     | 1151.283 | 9.824751 | 1151.225 | 9.889465 | 1151.118 | 9.953218 | 1151.013 |
| 1151.28  | 9.791563 | 1151.28  | 9.825828 | 1151.223 | 9.891682 | 1151.115 | 9.954665 | 1151.01  |
| 1151.266 | 9.8      | 1151.266 | 9.826905 | 1151.222 | 9.893153 | 1151.112 | 9.956112 | 1151.008 |
| 1151.264 | 9.801563 | 1151.264 | 9.828789 | 1151.219 | 9.894374 | 1151.11  | 9.96     | 1151.002 |
| 1151.25  | 9.81     | 1151.25  | 9.83     | 1151.217 | 9.895595 | 1151.108 | 9.961654 | 1150.999 |
| 1151.247 | 9.811563 | 1151.247 | 9.831218 | 1151.215 | 9.896815 | 1151.106 | 9.963    | 1150.997 |
| 1151.233 | 9.82     | 1151.233 | 9.832275 | 1151.213 | 9.9      | 1151.101 | 9.964346 | 1150.994 |
| 1151.231 | 9.821563 | 1151.231 | 9.834039 | 1151.21  | 9.901395 | 1151.099 | 9.965693 | 1150.992 |
| 1151.217 | 9.83     | 1151.217 | 9.835295 | 1151.208 | 9.902616 | 1151.097 | 9.97     | 1150.985 |
| 1151.214 | 9.831563 | 1151.214 | 9.836663 | 1151.206 | 9.903715 | 1151.095 | 9.971539 | 1150.983 |
| 1151.2   | 9.84     | 1151.2   | 9.84     | 1151.2   | 9.904813 | 1151.093 | 9.972787 | 1150.981 |
| 1151.197 | 9.841563 | 1151.197 | 9.841563 | 1151.197 | 9.905912 | 1151.091 | 9.974036 | 1150.978 |
| 1151.184 | 9.85     | 1151.184 | 9.85     | 1151.184 | 9.91     | 1151.084 | 9.975285 | 1150.976 |
| 1151.181 | 9.851563 | 1151.181 | 9.851563 | 1151.181 | 9.911256 | 1151.082 | 9.979655 | 1150.969 |
| 1151.167 | 9.86     | 1151.167 | 9.86     | 1151.167 | 9.912354 | 1151.08  | 9.98121  | 1150.967 |
| 1151.164 | 9.861563 | 1151.164 | 9.861563 | 1151.164 | 9.914332 | 1151.077 | 9.982234 | 1150.965 |
| 1151.15  | 9.87     | 1151.15  | 9.87     | 1151.15  | 9.918499 | 1151.07  | 9.983258 | 1150.963 |
| 1151.148 | 9.871563 | 1151.148 | 9.871563 | 1151.148 | 9.92     | 1151.068 | 9.98505  | 1150.96  |
| 1151.134 | 9.88     | 1151.134 | 9.88     | 1151.134 | 9.921625 | 1151.065 | 9.986522 | 1150.958 |
| 1151.131 | 9.881563 | 1151.131 | 9.881563 | 1151.131 | 9.923674 | 1151.062 | 9.987993 | 1150.955 |
| 1151.117 | 9.89     | 1151.117 | 9.89     | 1151.117 | 9.924751 | 1151.06  | 9.989465 | 1150.953 |
| 1151.115 | 9.891563 | 1151.115 | 9.891563 | 1151.115 | 9.925828 | 1151.058 | 9.991682 | 1150.949 |
| 1151.101 | 9.9      | 1151.101 | 9.9      | 1151.101 | 9.926905 | 1151.056 | 9.993153 | 1150.947 |

|          |          |          |          |          |          |          |          |          |
|----------|----------|----------|----------|----------|----------|----------|----------|----------|
| 1151.098 | 9.901563 | 1151.098 | 9.901563 | 1151.098 | 9.928789 | 1151.053 | 9.994374 | 1150.945 |
| 1151.084 | 9.91     | 1151.084 | 9.91     | 1151.084 | 9.93     | 1151.051 | 9.995595 | 1150.943 |
| 1151.082 | 9.911563 | 1151.082 | 9.911563 | 1151.082 | 9.931218 | 1151.049 | 9.996815 | 1150.941 |
| 1151.068 | 9.92     | 1151.068 | 9.92     | 1151.068 | 9.932275 | 1151.047 | 9.998492 | 1150.938 |
| 1151.065 | 9.921563 | 1151.065 | 9.921563 | 1151.065 | 9.934039 | 1151.045 | 9.999732 | 1150.936 |
| 1151.051 | 9.93     | 1151.051 | 9.93     | 1151.051 | 9.935295 | 1151.042 | 10.00084 | 1150.934 |
| 1151.049 | 9.931563 | 1151.049 | 9.931563 | 1151.049 | 9.936663 | 1151.04  | 10.00206 | 1150.932 |
| 1151.035 | 9.94     | 1151.035 | 9.94     | 1151.035 | 9.94     | 1151.035 | 10.00313 | 1150.93  |
| 1151.032 | 9.941563 | 1151.032 | 9.941563 | 1151.032 | 9.941564 | 1151.032 | 10.005   | 1150.927 |
| 1151.018 | 9.95     | 1151.018 | 9.95     | 1151.018 | 9.95     | 1151.018 | 10.00607 | 1150.925 |
| 1151.016 | 9.951563 | 1151.016 | 9.951563 | 1151.016 | 9.951564 | 1151.016 | 10.00714 | 1150.924 |
| 1151.002 | 9.96     | 1151.002 | 9.96     | 1151.002 | 9.96     | 1151.002 | 10.00821 | 1150.922 |
| 1150.999 | 9.961563 | 1150.999 | 9.961563 | 1150.999 | 9.961564 | 1150.999 | 10.00928 | 1150.92  |
| 1150.985 | 9.97     | 1150.985 | 9.97     | 1150.985 | 9.97     | 1150.985 | 10.01045 | 1150.918 |
| 1150.983 | 9.971563 | 1150.983 | 9.971563 | 1150.983 | 9.971564 | 1150.983 | 10.01161 | 1150.916 |
| 1150.969 | 9.98     | 1150.969 | 9.98     | 1150.969 | 9.98     | 1150.969 | 10.01342 | 1150.913 |
| 1150.966 | 9.981563 | 1150.966 | 9.981563 | 1150.966 | 9.981564 | 1150.966 | 10.01514 | 1150.91  |
| 1150.952 | 9.99     | 1150.952 | 9.99     | 1150.952 | 9.99     | 1150.952 | 10.01829 | 1150.905 |
| 1150.949 | 9.991563 | 1150.949 | 9.991563 | 1150.949 | 9.991564 | 1150.949 | 10.02    | 1150.902 |
| 1150.946 | 9.993673 | 1150.946 | 9.993673 | 1150.946 | 9.993673 | 1150.946 | 10.02109 | 1150.901 |
| 1150.943 | 9.995254 | 1150.943 | 9.995254 | 1150.943 | 9.995255 | 1150.943 | 10.02262 | 1150.898 |
| 1150.939 | 9.998023 | 1150.939 | 9.998023 | 1150.939 | 9.998023 | 1150.939 | 10.02386 | 1150.896 |
| 1150.937 | 9.999135 | 1150.937 | 9.999135 | 1150.937 | 9.999135 | 1150.937 | 10.02498 | 1150.894 |
| 1150.935 | 10.00025 | 1150.935 | 10.00025 | 1150.935 | 10.00025 | 1150.935 | 10.02611 | 1150.892 |
| 1150.933 | 10.00138 | 1150.933 | 10.00138 | 1150.933 | 10.00138 | 1150.933 | 10.02723 | 1150.89  |
| 1150.931 | 10.0027  | 1150.931 | 10.0027  | 1150.931 | 10.0027  | 1150.931 | 10.02835 | 1150.889 |
| 1150.929 | 10.00424 | 1150.929 | 10.00424 | 1150.929 | 10.00424 | 1150.929 | 10.02941 | 1150.887 |
| 1150.926 | 10.00558 | 1150.926 | 10.00558 | 1150.926 | 10.00558 | 1150.926 | 10.03045 | 1150.885 |
| 1150.924 | 10.00674 | 1150.924 | 10.00674 | 1150.924 | 10.00674 | 1150.924 | 10.03148 | 1150.883 |
| 1150.922 | 10.00791 | 1150.922 | 10.00791 | 1150.922 | 10.00791 | 1150.922 | 10.03263 | 1150.881 |
| 1150.921 | 10.00907 | 1150.921 | 10.00907 | 1150.921 | 10.00907 | 1150.921 | 10.03381 | 1150.878 |
| 1150.919 | 10.01009 | 1150.919 | 10.01009 | 1150.919 | 10.01009 | 1150.919 | 10.0351  | 1150.874 |
| 1150.916 | 10.01155 | 1150.916 | 10.01155 | 1150.916 | 10.01155 | 1150.916 | 10.03628 | 1150.87  |
| 1150.913 | 10.01336 | 1150.913 | 10.01336 | 1150.913 | 10.01336 | 1150.913 | 10.03756 | 1150.865 |
| 1150.911 | 10.01505 | 1150.911 | 10.01505 | 1150.911 | 10.01505 | 1150.911 | 10.03894 | 1150.859 |
| 1150.905 | 10.01819 | 1150.905 | 10.01819 | 1150.905 | 10.01819 | 1150.905 | 10.04    | 1150.854 |
| 1150.902 | 10.02    | 1150.902 | 10.02    | 1150.902 | 10.02    | 1150.902 | 10.04107 | 1150.849 |
| 1150.901 | 10.02109 | 1150.901 | 10.02109 | 1150.901 | 10.02109 | 1150.901 | 10.04229 | 1150.842 |
| 1150.898 | 10.02262 | 1150.898 | 10.02262 | 1150.898 | 10.02262 | 1150.898 | 10.04329 | 1150.836 |
| 1150.896 | 10.02387 | 1150.896 | 10.02387 | 1150.896 | 10.02387 | 1150.896 | 10.04454 | 1150.829 |
| 1150.894 | 10.02499 | 1150.894 | 10.02499 | 1150.894 | 10.02499 | 1150.894 | 10.04563 | 1150.823 |
| 1150.892 | 10.02611 | 1150.892 | 10.02611 | 1150.892 | 10.02611 | 1150.892 | 10.04667 | 1150.816 |
| 1150.89  | 10.02723 | 1150.89  | 10.02723 | 1150.89  | 10.02723 | 1150.89  | 10.04776 | 1150.809 |
| 1150.889 | 10.02836 | 1150.889 | 10.02836 | 1150.889 | 10.02836 | 1150.889 | 10.04886 | 1150.802 |
| 1150.887 | 10.02941 | 1150.887 | 10.02941 | 1150.887 | 10.02941 | 1150.887 | 10.05    | 1150.794 |
| 1150.885 | 10.03044 | 1150.885 | 10.03044 | 1150.885 | 10.03044 | 1150.885 | 10.05118 | 1150.786 |
| 1150.883 | 10.03151 | 1150.883 | 10.03151 | 1150.883 | 10.03151 | 1150.883 | 10.05222 | 1150.778 |

|          |          |          |          |          |          |          |          |          |
|----------|----------|----------|----------|----------|----------|----------|----------|----------|
| 1150.88  | 10.03266 | 1150.881 | 10.03266 | 1150.881 | 10.03266 | 1150.881 | 10.05353 | 1150.769 |
| 1150.877 | 10.03413 | 1150.877 | 10.03413 | 1150.877 | 10.03413 | 1150.877 | 10.05533 | 1150.755 |
| 1150.873 | 10.03572 | 1150.872 | 10.03572 | 1150.872 | 10.03572 | 1150.872 | 10.05728 | 1150.74  |
| 1150.868 | 10.03695 | 1150.868 | 10.03695 | 1150.868 | 10.03695 | 1150.868 | 10.05903 | 1150.727 |
| 1150.863 | 10.03806 | 1150.863 | 10.03806 | 1150.863 | 10.03806 | 1150.863 | 10.06012 | 1150.719 |
| 1150.857 | 10.03916 | 1150.858 | 10.03916 | 1150.858 | 10.03916 | 1150.858 | 10.06124 | 1150.71  |
| 1150.85  | 10.0402  | 1150.853 | 10.0402  | 1150.853 | 10.0402  | 1150.853 | 10.06225 | 1150.703 |
| 1150.844 | 10.04136 | 1150.847 | 10.04136 | 1150.847 | 10.04136 | 1150.847 | 10.06367 | 1150.692 |
| 1150.837 | 10.04243 | 1150.841 | 10.04243 | 1150.841 | 10.04243 | 1150.841 | 10.06524 | 1150.679 |
| 1150.831 | 10.04391 | 1150.833 | 10.04391 | 1150.833 | 10.04391 | 1150.833 | 10.06674 | 1150.667 |
| 1150.823 | 10.04493 | 1150.827 | 10.04493 | 1150.827 | 10.04493 | 1150.827 | 10.06808 | 1150.656 |
| 1150.814 | 10.04631 | 1150.819 | 10.04631 | 1150.819 | 10.04631 | 1150.819 | 10.06929 | 1150.646 |
| 1150.807 | 10.04735 | 1150.812 | 10.04735 | 1150.812 | 10.04735 | 1150.812 | 10.07032 | 1150.637 |
| 1150.798 | 10.04839 | 1150.805 | 10.04839 | 1150.805 | 10.04839 | 1150.805 | 10.07134 | 1150.629 |
| 1150.791 | 10.04968 | 1150.796 | 10.04968 | 1150.796 | 10.04968 | 1150.796 | 10.07256 | 1150.618 |
| 1150.784 | 10.05077 | 1150.789 | 10.05077 | 1150.789 | 10.05077 | 1150.789 | 10.07389 | 1150.607 |
| 1150.773 | 10.0523  | 1150.778 | 10.0523  | 1150.778 | 10.0523  | 1150.778 | 10.0749  | 1150.598 |
| 1150.765 | 10.05343 | 1150.769 | 10.05343 | 1150.769 | 10.05343 | 1150.769 | 10.07625 | 1150.587 |
| 1150.751 | 10.05499 | 1150.758 | 10.05499 | 1150.758 | 10.05499 | 1150.758 | 10.07769 | 1150.574 |
| 1150.74  | 10.05667 | 1150.745 | 10.05667 | 1150.745 | 10.05667 | 1150.745 | 10.07886 | 1150.564 |
| 1150.73  | 10.05811 | 1150.734 | 10.05811 | 1150.734 | 10.05811 | 1150.734 | 10.07988 | 1150.555 |
| 1150.72  | 10.05955 | 1150.723 | 10.05955 | 1150.723 | 10.05955 | 1150.723 | 10.08148 | 1150.541 |
| 1150.712 | 10.06084 | 1150.713 | 10.06084 | 1150.713 | 10.06084 | 1150.713 | 10.08289 | 1150.529 |
| 1150.702 | 10.062   | 1150.705 | 10.062   | 1150.705 | 10.062   | 1150.705 | 10.08412 | 1150.518 |
| 1150.69  | 10.06328 | 1150.695 | 10.06328 | 1150.695 | 10.06328 | 1150.695 | 10.08536 | 1150.507 |
| 1150.68  | 10.0647  | 1150.684 | 10.0647  | 1150.684 | 10.0647  | 1150.684 | 10.08751 | 1150.489 |
| 1150.67  | 10.06605 | 1150.673 | 10.06605 | 1150.673 | 10.06605 | 1150.673 | 10.09    | 1150.468 |
| 1150.661 | 10.06724 | 1150.663 | 10.06724 | 1150.663 | 10.06724 | 1150.663 | 10.09116 | 1150.458 |
| 1150.653 | 10.0683  | 1150.654 | 10.0683  | 1150.654 | 10.0683  | 1150.654 | 10.09265 | 1150.445 |
| 1150.644 | 10.06936 | 1150.645 | 10.06936 | 1150.645 | 10.06936 | 1150.645 | 10.09425 | 1150.431 |
| 1150.634 | 10.07042 | 1150.636 | 10.07042 | 1150.636 | 10.07042 | 1150.636 | 10.09645 | 1150.412 |
| 1150.625 | 10.07153 | 1150.627 | 10.07153 | 1150.627 | 10.07153 | 1150.627 | 10.09785 | 1150.4   |
| 1150.615 | 10.07272 | 1150.617 | 10.07272 | 1150.617 | 10.07272 | 1150.617 | 10.09925 | 1150.387 |
| 1150.606 | 10.07397 | 1150.606 | 10.07397 | 1150.606 | 10.07397 | 1150.606 | 10.10046 | 1150.377 |
| 1150.594 | 10.07523 | 1150.595 | 10.07523 | 1150.595 | 10.07523 | 1150.595 | 10.10172 | 1150.366 |
| 1150.585 | 10.0765  | 1150.584 | 10.0765  | 1150.584 | 10.0765  | 1150.584 | 10.10316 | 1150.353 |
| 1150.574 | 10.07777 | 1150.574 | 10.07777 | 1150.574 | 10.07777 | 1150.574 | 10.10514 | 1150.335 |
| 1150.564 | 10.07895 | 1150.563 | 10.07895 | 1150.563 | 10.07895 | 1150.563 | 10.1064  | 1150.324 |
| 1150.554 | 10.08    | 1150.554 | 10.08    | 1150.554 | 10.08    | 1150.554 | 10.10766 | 1150.313 |
| 1150.545 | 10.08136 | 1150.542 | 10.08136 | 1150.542 | 10.08136 | 1150.542 | 10.10986 | 1150.294 |
| 1150.534 | 10.08249 | 1150.532 | 10.08249 | 1150.532 | 10.08249 | 1150.532 | 10.11109 | 1150.283 |
| 1150.519 | 10.08404 | 1150.519 | 10.08404 | 1150.519 | 10.08404 | 1150.519 | 10.11244 | 1150.271 |
| 1150.51  | 10.08675 | 1150.495 | 10.08675 | 1150.495 | 10.08675 | 1150.495 | 10.11381 | 1150.259 |
| 1150.494 | 10.08848 | 1150.48  | 10.08848 | 1150.48  | 10.08848 | 1150.48  | 10.11571 | 1150.243 |
| 1150.467 | 10.09    | 1150.467 | 10.09    | 1150.467 | 10.09    | 1150.467 | 10.11691 | 1150.232 |
| 1150.458 | 10.09104 | 1150.459 | 10.09104 | 1150.459 | 10.09104 | 1150.459 | 10.11812 | 1150.222 |
| 1150.443 | 10.09271 | 1150.444 | 10.09271 | 1150.444 | 10.09271 | 1150.444 | 10.12    | 1150.206 |

|          |          |          |          |          |          |          |          |          |
|----------|----------|----------|----------|----------|----------|----------|----------|----------|
| 1150.43  | 10.0943  | 1150.431 | 10.0943  | 1150.431 | 10.0943  | 1150.431 | 10.1214  | 1150.193 |
| 1150.417 | 10.09568 | 1150.418 | 10.09568 | 1150.418 | 10.09568 | 1150.418 | 10.12256 | 1150.183 |
| 1150.405 | 10.09707 | 1150.406 | 10.09707 | 1150.406 | 10.09707 | 1150.406 | 10.12416 | 1150.169 |
| 1150.393 | 10.09846 | 1150.394 | 10.09846 | 1150.394 | 10.09846 | 1150.394 | 10.12518 | 1150.16  |
| 1150.38  | 10.1     | 1150.381 | 10.1     | 1150.381 | 10.1     | 1150.381 | 10.1262  | 1150.151 |
| 1150.365 | 10.10171 | 1150.365 | 10.10171 | 1150.365 | 10.10171 | 1150.365 | 10.12798 | 1150.136 |
| 1150.353 | 10.10315 | 1150.353 | 10.10315 | 1150.353 | 10.10315 | 1150.353 | 10.13    | 1150.118 |
| 1150.335 | 10.10512 | 1150.335 | 10.10512 | 1150.335 | 10.10512 | 1150.335 | 10.13122 | 1150.107 |
| 1150.324 | 10.10638 | 1150.324 | 10.10638 | 1150.324 | 10.10638 | 1150.324 | 10.1324  | 1150.097 |
| 1150.313 | 10.10763 | 1150.313 | 10.10763 | 1150.313 | 10.10763 | 1150.313 | 10.13344 | 1150.088 |
| 1150.294 | 10.10983 | 1150.294 | 10.10983 | 1150.294 | 10.10983 | 1150.294 | 10.13525 | 1150.072 |
| 1150.283 | 10.11109 | 1150.283 | 10.11109 | 1150.283 | 10.11109 | 1150.283 | 10.13633 | 1150.063 |
| 1150.271 | 10.11243 | 1150.271 | 10.11243 | 1150.271 | 10.11243 | 1150.271 | 10.13808 | 1150.047 |
| 1150.259 | 10.11381 | 1150.259 | 10.11381 | 1150.259 | 10.11381 | 1150.259 | 10.14    | 1150.03  |
| 1150.243 | 10.1157  | 1150.243 | 10.1157  | 1150.243 | 10.1157  | 1150.243 | 10.14108 | 1150.021 |
| 1150.232 | 10.11691 | 1150.232 | 10.11691 | 1150.232 | 10.11691 | 1150.232 | 10.14242 | 1150.009 |
| 1150.222 | 10.11811 | 1150.222 | 10.11811 | 1150.222 | 10.11811 | 1150.222 | 10.14375 | 1149.998 |
| 1150.205 | 10.12    | 1150.205 | 10.12    | 1150.205 | 10.12    | 1150.205 | 10.14509 | 1149.986 |
| 1150.193 | 10.1214  | 1150.193 | 10.1214  | 1150.193 | 10.1214  | 1150.193 | 10.14978 | 1149.945 |
| 1150.183 | 10.12256 | 1150.183 | 10.12256 | 1150.183 | 10.12256 | 1150.183 | 10.1514  | 1149.931 |
| 1150.169 | 10.12416 | 1150.169 | 10.12416 | 1150.169 | 10.12416 | 1150.169 | 10.15267 | 1149.92  |
| 1150.16  | 10.12518 | 1150.16  | 10.12518 | 1150.16  | 10.12518 | 1150.16  | 10.15395 | 1149.909 |
| 1150.151 | 10.1262  | 1150.151 | 10.1262  | 1150.151 | 10.1262  | 1150.151 | 10.15618 | 1149.889 |
| 1150.136 | 10.12798 | 1150.136 | 10.12798 | 1150.136 | 10.12798 | 1150.136 | 10.15814 | 1149.872 |
| 1150.118 | 10.13    | 1150.118 | 10.13    | 1150.118 | 10.13    | 1150.118 | 10.16    | 1149.855 |
| 1150.107 | 10.13122 | 1150.107 | 10.13122 | 1150.107 | 10.13122 | 1150.107 | 10.16224 | 1149.836 |
| 1150.097 | 10.1324  | 1150.097 | 10.1324  | 1150.097 | 10.1324  | 1150.097 | 10.1642  | 1149.819 |
| 1150.088 | 10.13344 | 1150.088 | 10.13344 | 1150.088 | 10.13344 | 1150.088 | 10.16596 | 1149.803 |
| 1150.072 | 10.13525 | 1150.072 | 10.13525 | 1150.072 | 10.13525 | 1150.072 | 10.16773 | 1149.788 |
| 1150.062 | 10.13631 | 1150.063 | 10.13631 | 1150.063 | 10.13631 | 1150.063 | 10.16949 | 1149.772 |
| 1150.052 | 10.13773 | 1150.05  | 10.13773 | 1150.05  | 10.13773 | 1150.05  | 10.17202 | 1149.75  |
| 1150.03  | 10.14    | 1150.03  | 10.14    | 1150.03  | 10.14    | 1150.03  | 10.17376 | 1149.735 |
| 1150.013 | 10.14212 | 1150.012 | 10.14212 | 1150.012 | 10.14212 | 1150.012 | 10.17551 | 1149.719 |
| 1149.998 | 10.14344 | 1150     | 10.14344 | 1150     | 10.14344 | 1150     | 10.17742 | 1149.702 |
| 1149.985 | 10.14493 | 1149.987 | 10.14493 | 1149.987 | 10.14493 | 1149.987 | 10.17874 | 1149.69  |
| 1149.972 | 10.14642 | 1149.974 | 10.14642 | 1149.974 | 10.14642 | 1149.974 | 10.18    | 1149.677 |
| 1149.958 | 10.14791 | 1149.961 | 10.14791 | 1149.961 | 10.14791 | 1149.961 | 10.18151 | 1149.66  |
| 1149.943 | 10.15    | 1149.943 | 10.15    | 1149.943 | 10.15    | 1149.943 | 10.18282 | 1149.642 |
| 1149.928 | 10.1517  | 1149.928 | 10.1517  | 1149.928 | 10.1517  | 1149.928 | 10.18401 | 1149.624 |
| 1149.915 | 10.1532  | 1149.915 | 10.1532  | 1149.915 | 10.1532  | 1149.915 | 10.18519 | 1149.604 |
| 1149.901 | 10.15469 | 1149.902 | 10.15469 | 1149.902 | 10.15469 | 1149.902 | 10.18638 | 1149.581 |
| 1149.888 | 10.15618 | 1149.889 | 10.15618 | 1149.889 | 10.15618 | 1149.889 | 10.18992 | 1149.508 |
| 1149.855 | 10.16    | 1149.855 | 10.16    | 1149.855 | 10.16    | 1149.855 | 10.19094 | 1149.485 |
| 1149.84  | 10.16171 | 1149.84  | 10.16171 | 1149.84  | 10.16171 | 1149.84  | 10.19246 | 1149.448 |
| 1149.826 | 10.16332 | 1149.826 | 10.16332 | 1149.826 | 10.16332 | 1149.826 | 10.19379 | 1149.416 |
| 1149.812 | 10.16493 | 1149.812 | 10.16493 | 1149.812 | 10.16493 | 1149.812 | 10.19479 | 1149.39  |
| 1149.798 | 10.16654 | 1149.798 | 10.16654 | 1149.798 | 10.16654 | 1149.798 | 10.19579 | 1149.364 |

|          |          |          |          |          |          |          |          |          |
|----------|----------|----------|----------|----------|----------|----------|----------|----------|
| 1149.768 | 10.17    | 1149.768 | 10.17    | 1149.768 | 10.17    | 1149.768 | 10.19679 | 1149.337 |
| 1149.751 | 10.17184 | 1149.752 | 10.17184 | 1149.752 | 10.17184 | 1149.752 | 10.19854 | 1149.289 |
| 1149.736 | 10.17358 | 1149.736 | 10.17358 | 1149.736 | 10.17358 | 1149.736 | 10.2     | 1149.247 |
| 1149.721 | 10.17532 | 1149.721 | 10.17532 | 1149.721 | 10.17532 | 1149.721 | 10.20114 | 1149.212 |
| 1149.704 | 10.17673 | 1149.709 | 10.17726 | 1149.704 | 10.17726 | 1149.704 | 10.20303 | 1149.151 |
| 1149.694 | 10.17819 | 1149.695 | 10.17838 | 1149.694 | 10.17838 | 1149.694 | 10.20482 | 1149.089 |
| 1149.683 | 10.17965 | 1149.68  | 10.17949 | 1149.683 | 10.17949 | 1149.683 | 10.20639 | 1149.033 |
| 1149.664 | 10.18167 | 1149.658 | 10.18127 | 1149.664 | 10.18127 | 1149.664 | 10.20795 | 1148.975 |
| 1149.65  | 10.18312 | 1149.638 | 10.1823  | 1149.651 | 10.1823  | 1149.651 | 10.20952 | 1148.914 |
| 1149.636 | 10.18431 | 1149.619 | 10.18332 | 1149.636 | 10.18332 | 1149.636 | 10.21054 | 1148.874 |
| 1149.619 | 10.18549 | 1149.598 | 10.18434 | 1149.62  | 10.18434 | 1149.62  | 10.21204 | 1148.812 |
| 1149.553 | 10.18667 | 1149.576 | 10.18792 | 1149.553 | 10.18792 | 1149.553 | 10.21377 | 1148.74  |
| 1149.508 | 10.19    | 1149.506 | 10.19    | 1149.508 | 10.19    | 1149.508 | 10.21614 | 1148.636 |
| 1149.467 | 10.19135 | 1149.475 | 10.19171 | 1149.468 | 10.19171 | 1149.468 | 10.21765 | 1148.568 |
| 1149.416 | 10.19253 | 1149.446 | 10.1938  | 1149.416 | 10.1938  | 1149.416 | 10.22    | 1148.457 |
| 1149.365 | 10.19439 | 1149.4   | 10.1948  | 1149.391 | 10.1948  | 1149.391 | 10.22108 | 1148.404 |
| 1149.29  | 10.19879 | 1149.283 | 10.1958  | 1149.365 | 10.1958  | 1149.365 | 10.22301 | 1148.306 |
| 1149.248 | 10.2     | 1149.247 | 10.1968  | 1149.338 | 10.1968  | 1149.338 | 10.22565 | 1148.167 |
| 1149.214 | 10.20162 | 1149.198 | 10.19855 | 1149.29  | 10.19855 | 1149.29  | 10.22734 | 1148.075 |
| 1149.153 | 10.20305 | 1149.151 | 10.2     | 1149.249 | 10.2     | 1149.249 | 10.22902 | 1147.981 |
| 1149.091 | 10.20431 | 1149.109 | 10.20114 | 1149.214 | 10.20114 | 1149.214 | 10.23024 | 1147.912 |
| 1149.035 | 10.20556 | 1149.065 | 10.20302 | 1149.153 | 10.20302 | 1149.153 | 10.2322  | 1147.797 |
| 1148.976 | 10.20775 | 1148.984 | 10.20481 | 1149.091 | 10.20481 | 1149.091 | 10.23405 | 1147.685 |
| 1148.916 | 10.20994 | 1148.899 | 10.20637 | 1149.035 | 10.20637 | 1149.035 | 10.2366  | 1147.527 |
| 1148.875 | 10.21128 | 1148.845 | 10.20793 | 1148.977 | 10.20793 | 1148.977 | 10.23823 | 1147.423 |
| 1148.813 | 10.21235 | 1148.801 | 10.2095  | 1148.916 | 10.2095  | 1148.916 | 10.24    | 1147.307 |
| 1148.741 | 10.21424 | 1148.72  | 10.21054 | 1148.875 | 10.21054 | 1148.875 | 10.24119 | 1147.227 |
| 1148.637 | 10.21683 | 1148.606 | 10.21204 | 1148.814 | 10.21204 | 1148.814 | 10.24225 | 1147.155 |
| 1148.569 | 10.21847 | 1148.53  | 10.21376 | 1148.741 | 10.21376 | 1148.741 | 10.24331 | 1147.081 |
| 1148.458 | 10.22    | 1148.458 | 10.21613 | 1148.638 | 10.21613 | 1148.638 | 10.24437 | 1147.006 |
| 1148.405 | 10.22113 | 1148.403 | 10.21764 | 1148.57  | 10.21764 | 1148.57  | 10.24623 | 1146.874 |
| 1148.307 | 10.22301 | 1148.307 | 10.22    | 1148.458 | 10.22    | 1148.458 | 10.24809 | 1146.739 |
| 1148.168 | 10.22479 | 1148.214 | 10.22108 | 1148.406 | 10.22108 | 1148.406 | 10.24995 | 1146.6   |
| 1148.076 | 10.22635 | 1148.13  | 10.223   | 1148.308 | 10.223   | 1148.308 | 10.25131 | 1146.497 |
| 1147.982 | 10.22792 | 1148.044 | 10.22565 | 1148.168 | 10.22565 | 1148.168 | 10.25248 | 1146.407 |
| 1147.912 | 10.23    | 1147.926 | 10.22733 | 1148.077 | 10.22733 | 1148.077 | 10.25365 | 1146.315 |
| 1147.798 | 10.23112 | 1147.861 | 10.22901 | 1147.983 | 10.22901 | 1147.983 | 10.25482 | 1146.223 |
| 1147.686 | 10.23213 | 1147.802 | 10.23024 | 1147.913 | 10.23024 | 1147.913 | 10.25686 | 1146.058 |
| 1147.528 | 10.23313 | 1147.741 | 10.2322  | 1147.798 | 10.2322  | 1147.798 | 10.25891 | 1145.89  |
| 1147.424 | 10.23414 | 1147.68  | 10.23405 | 1147.687 | 10.23405 | 1147.687 | 10.26    | 1145.798 |
| 1147.307 | 10.23589 | 1147.572 | 10.2366  | 1147.528 | 10.2366  | 1147.528 | 10.26143 | 1145.676 |
| 1147.228 | 10.23765 | 1147.461 | 10.23822 | 1147.424 | 10.23822 | 1147.424 | 10.2627  | 1145.567 |
| 1147.155 | 10.23941 | 1147.347 | 10.24    | 1147.308 | 10.24    | 1147.308 | 10.26385 | 1145.466 |
| 1147.081 | 10.24061 | 1147.267 | 10.24119 | 1147.228 | 10.24119 | 1147.228 | 10.26499 | 1145.365 |
| 1147.007 | 10.24232 | 1147.15  | 10.24225 | 1147.156 | 10.24225 | 1147.156 | 10.26614 | 1145.263 |
| 1146.874 | 10.24429 | 1147.013 | 10.24331 | 1147.082 | 10.24331 | 1147.082 | 10.26814 | 1145.081 |
| 1146.739 | 10.24699 | 1146.819 | 10.24437 | 1147.007 | 10.24437 | 1147.007 | 10.27    | 1144.91  |

|          |          |          |          |          |          |          |          |          |
|----------|----------|----------|----------|----------|----------|----------|----------|----------|
| 1146.601 | 10.24871 | 1146.693 | 10.24623 | 1146.875 | 10.24623 | 1146.875 | 10.27148 | 1144.771 |
| 1146.498 | 10.25    | 1146.597 | 10.24809 | 1146.74  | 10.24809 | 1146.74  | 10.27281 | 1144.644 |
| 1146.407 | 10.25127 | 1146.501 | 10.24995 | 1146.602 | 10.24995 | 1146.602 | 10.27413 | 1144.516 |
| 1146.316 | 10.2524  | 1146.413 | 10.25131 | 1146.498 | 10.25131 | 1146.498 | 10.27546 | 1144.386 |
| 1146.223 | 10.25354 | 1146.324 | 10.25248 | 1146.408 | 10.25248 | 1146.408 | 10.27778 | 1144.156 |
| 1146.059 | 10.25468 | 1146.234 | 10.25365 | 1146.316 | 10.25365 | 1146.316 | 10.28    | 1143.932 |
| 1145.89  | 10.25666 | 1146.075 | 10.25482 | 1146.224 | 10.25482 | 1146.224 | 10.28165 | 1143.762 |
| 1145.798 | 10.25865 | 1145.911 | 10.25686 | 1146.059 | 10.25686 | 1146.059 | 10.28312 | 1143.608 |
| 1145.677 | 10.26    | 1145.799 | 10.2589  | 1145.891 | 10.2589  | 1145.891 | 10.28459 | 1143.452 |
| 1145.567 | 10.26141 | 1145.678 | 10.26    | 1145.799 | 10.26    | 1145.799 | 10.28607 | 1143.294 |
| 1145.467 | 10.26267 | 1145.57  | 10.26143 | 1145.677 | 10.26143 | 1145.677 | 10.28864 | 1143.015 |
| 1145.365 | 10.26393 | 1145.459 | 10.2627  | 1145.567 | 10.2627  | 1145.567 | 10.29    | 1142.865 |
| 1145.263 | 10.26519 | 1145.348 | 10.26385 | 1145.467 | 10.26385 | 1145.467 | 10.29181 | 1142.663 |
| 1145.082 | 10.26739 | 1145.15  | 10.26499 | 1145.366 | 10.26499 | 1145.366 | 10.29341 | 1142.481 |
| 1144.91  | 10.26959 | 1144.948 | 10.26613 | 1145.264 | 10.26613 | 1145.264 | 10.29485 | 1142.315 |
| 1144.771 | 10.27076 | 1144.839 | 10.26813 | 1145.082 | 10.26813 | 1145.082 | 10.29629 | 1142.148 |
| 1144.644 | 10.27292 | 1144.634 | 10.27    | 1144.91  | 10.27    | 1144.91  | 10.29773 | 1141.978 |
| 1144.516 | 10.27415 | 1144.514 | 10.27148 | 1144.772 | 10.27148 | 1144.772 | 10.3     | 1141.708 |
| 1144.386 | 10.27539 | 1144.393 | 10.2728  | 1144.645 | 10.2728  | 1144.645 | 10.30165 | 1141.51  |
| 1144.156 | 10.27662 | 1144.271 | 10.27413 | 1144.517 | 10.27413 | 1144.517 | 10.30298 | 1141.347 |
| 1143.932 | 10.27879 | 1144.055 | 10.27546 | 1144.387 | 10.27546 | 1144.387 | 10.30432 | 1141.182 |
| 1143.762 | 10.28    | 1143.932 | 10.27778 | 1144.157 | 10.27778 | 1144.157 | 10.30566 | 1141.016 |
| 1143.608 | 10.2816  | 1143.768 | 10.28    | 1143.932 | 10.28    | 1143.932 | 10.31    | 1140.465 |
| 1143.452 | 10.28303 | 1143.618 | 10.28165 | 1143.762 | 10.28165 | 1143.762 | 10.31153 | 1140.268 |
| 1143.294 | 10.28446 | 1143.466 | 10.28312 | 1143.609 | 10.28312 | 1143.609 | 10.31295 | 1140.082 |
| 1143.015 | 10.2859  | 1143.312 | 10.28459 | 1143.453 | 10.28459 | 1143.453 | 10.31437 | 1139.895 |
| 1142.865 | 10.28841 | 1143.04  | 10.28606 | 1143.295 | 10.28606 | 1143.295 | 10.31579 | 1139.705 |
| 1142.663 | 10.29    | 1142.865 | 10.28864 | 1143.016 | 10.28864 | 1143.016 | 10.32    | 1139.134 |
| 1142.481 | 10.29178 | 1142.665 | 10.29    | 1142.865 | 10.29    | 1142.865 | 10.32162 | 1138.91  |
| 1142.315 | 10.29337 | 1142.485 | 10.2918  | 1142.663 | 10.2918  | 1142.663 | 10.32314 | 1138.698 |
| 1142.147 | 10.29496 | 1142.302 | 10.2934  | 1142.481 | 10.2934  | 1142.481 | 10.32466 | 1138.483 |
| 1141.978 | 10.29654 | 1142.117 | 10.29485 | 1142.316 | 10.29485 | 1142.316 | 10.32617 | 1138.267 |
| 1141.708 | 10.29932 | 1141.79  | 10.29629 | 1142.148 | 10.29629 | 1142.148 | 10.33    | 1137.714 |
| 1141.51  | 10.3004  | 1141.661 | 10.29773 | 1141.979 | 10.29773 | 1141.979 | 10.33173 | 1137.459 |
| 1141.347 | 10.30194 | 1141.474 | 10.3     | 1141.709 | 10.3     | 1141.709 | 10.33335 | 1137.219 |
| 1141.182 | 10.30367 | 1141.262 | 10.30165 | 1141.511 | 10.30165 | 1141.511 | 10.33497 | 1136.975 |
| 1141.015 | 10.30522 | 1141.07  | 10.30298 | 1141.347 | 10.30298 | 1141.347 | 10.33658 | 1136.73  |
| 1140.465 | 10.30677 | 1140.875 | 10.30432 | 1141.182 | 10.30432 | 1141.182 | 10.34    | 1136.205 |
| 1140.268 | 10.30832 | 1140.678 | 10.30565 | 1141.016 | 10.30565 | 1141.016 | 10.34185 | 1135.918 |
| 1140.082 | 10.31    | 1140.463 | 10.31    | 1140.465 | 10.31    | 1140.465 | 10.34357 | 1135.646 |
| 1139.894 | 10.31177 | 1140.234 | 10.31153 | 1140.268 | 10.31153 | 1140.268 | 10.34529 | 1135.372 |
| 1139.704 | 10.31321 | 1140.046 | 10.31295 | 1140.082 | 10.31295 | 1140.082 | 10.34701 | 1135.096 |
| 1139.133 | 10.31464 | 1139.856 | 10.31437 | 1139.895 | 10.31437 | 1139.895 | 10.35    | 1134.609 |
| 1138.909 | 10.31607 | 1139.664 | 10.31578 | 1139.705 | 10.31578 | 1139.705 | 10.35196 | 1134.286 |
| 1138.697 | 10.32    | 1139.131 | 10.32    | 1139.134 | 10.32    | 1139.134 | 10.35379 | 1133.982 |
| 1138.482 | 10.32164 | 1138.905 | 10.32162 | 1138.91  | 10.32162 | 1138.91  | 10.35561 | 1133.674 |
| 1138.266 | 10.32316 | 1138.693 | 10.32314 | 1138.698 | 10.32314 | 1138.698 | 10.35744 | 1133.364 |

|          |          |          |          |          |          |          |          |          |
|----------|----------|----------|----------|----------|----------|----------|----------|----------|
| 1137.712 | 10.32467 | 1138.478 | 10.32465 | 1138.483 | 10.32465 | 1138.483 | 10.36    | 1132.924 |
| 1137.458 | 10.32619 | 1138.262 | 10.32617 | 1138.267 | 10.32617 | 1138.267 | 10.36208 | 1132.564 |
| 1137.217 | 10.33    | 1137.711 | 10.33    | 1137.713 | 10.33    | 1137.713 | 10.36402 | 1132.224 |
| 1136.974 | 10.33173 | 1137.457 | 10.33173 | 1137.459 | 10.33173 | 1137.459 | 10.36595 | 1131.881 |
| 1136.729 | 10.33335 | 1137.216 | 10.33335 | 1137.218 | 10.33335 | 1137.218 | 10.36788 | 1131.535 |
| 1136.204 | 10.33497 | 1136.972 | 10.33497 | 1136.975 | 10.33497 | 1136.975 | 10.37    | 1131.152 |
| 1135.917 | 10.33659 | 1136.727 | 10.33658 | 1136.73  | 10.33658 | 1136.73  | 10.37221 | 1130.751 |
| 1135.645 | 10.34    | 1136.203 | 10.34    | 1136.205 | 10.34    | 1136.205 | 10.37425 | 1130.374 |
| 1135.371 | 10.34185 | 1135.915 | 10.34185 | 1135.918 | 10.34185 | 1135.918 | 10.37629 | 1129.994 |
| 1135.094 | 10.34357 | 1135.644 | 10.34357 | 1135.646 | 10.34357 | 1135.646 | 10.37833 | 1129.609 |
| 1134.607 | 10.34529 | 1135.369 | 10.34529 | 1135.372 | 10.34529 | 1135.372 | 10.38    | 1129.292 |
| 1134.284 | 10.34701 | 1135.093 | 10.347   | 1135.095 | 10.347   | 1135.095 | 10.38233 | 1128.848 |
| 1133.98  | 10.35    | 1134.606 | 10.35    | 1134.608 | 10.35    | 1134.608 | 10.38448 | 1128.431 |
| 1133.673 | 10.35197 | 1134.283 | 10.35196 | 1134.286 | 10.35196 | 1134.286 | 10.38663 | 1128.011 |
| 1133.362 | 10.35379 | 1133.979 | 10.35379 | 1133.981 | 10.35379 | 1133.981 | 10.38878 | 1127.586 |
| 1132.923 | 10.35561 | 1133.671 | 10.35561 | 1133.674 | 10.35561 | 1133.674 | 10.39    | 1127.345 |
| 1132.562 | 10.35744 | 1133.361 | 10.35744 | 1133.364 | 10.35744 | 1133.364 | 10.39246 | 1126.855 |
| 1132.222 | 10.36    | 1132.922 | 10.36    | 1132.924 | 10.36    | 1132.924 | 10.39472 | 1126.396 |
| 1131.88  | 10.36208 | 1132.561 | 10.36208 | 1132.563 | 10.36208 | 1132.563 | 10.39699 | 1125.933 |
| 1131.534 | 10.36402 | 1132.221 | 10.36401 | 1132.224 | 10.36401 | 1132.224 | 10.39925 | 1125.465 |
| 1131.15  | 10.36595 | 1131.878 | 10.36595 | 1131.881 | 10.36595 | 1131.881 | 10.40032 | 1125.243 |
| 1130.749 | 10.36788 | 1131.532 | 10.36788 | 1131.535 | 10.36788 | 1131.535 | 10.40259 | 1124.772 |
| 1130.372 | 10.37    | 1131.149 | 10.37    | 1131.152 | 10.37    | 1131.152 | 10.40497 | 1124.268 |
| 1129.992 | 10.37221 | 1130.748 | 10.37221 | 1130.75  | 10.37221 | 1130.75  | 10.40735 | 1123.76  |
| 1129.607 | 10.37425 | 1130.371 | 10.37425 | 1130.373 | 10.37425 | 1130.373 | 10.40973 | 1123.247 |
| 1129.29  | 10.37629 | 1129.99  | 10.37629 | 1129.993 | 10.37629 | 1129.993 | 10.41272 | 1122.598 |
| 1128.846 | 10.37833 | 1129.606 | 10.37833 | 1129.609 | 10.37833 | 1129.609 | 10.41522 | 1122.048 |
| 1128.429 | 10.38    | 1129.289 | 10.38    | 1129.292 | 10.38    | 1129.292 | 10.41772 | 1121.492 |
| 1128.009 | 10.38233 | 1128.845 | 10.38233 | 1128.847 | 10.38233 | 1128.847 | 10.42    | 1120.979 |
| 1127.584 | 10.38448 | 1128.428 | 10.38448 | 1128.431 | 10.38448 | 1128.431 | 10.42285 | 1120.335 |
| 1127.343 | 10.38663 | 1128.007 | 10.38663 | 1128.01  | 10.38663 | 1128.01  | 10.42547 | 1119.735 |
| 1126.853 | 10.38879 | 1127.583 | 10.38878 | 1127.585 | 10.38878 | 1127.585 | 10.42809 | 1119.129 |
| 1126.394 | 10.39    | 1127.342 | 10.39    | 1127.344 | 10.39    | 1127.344 | 10.43    | 1118.684 |
| 1125.931 | 10.39246 | 1126.851 | 10.39246 | 1126.854 | 10.39246 | 1126.854 | 10.43299 | 1117.983 |
| 1125.463 | 10.39472 | 1126.393 | 10.39472 | 1126.395 | 10.39472 | 1126.395 | 10.43573 | 1117.331 |
| 1125.241 | 10.39699 | 1125.929 | 10.39699 | 1125.932 | 10.39699 | 1125.932 | 10.43847 | 1116.672 |
| 1124.769 | 10.39925 | 1125.462 | 10.39925 | 1125.464 | 10.39925 | 1125.464 | 10.44    | 1116.302 |
| 1124.266 | 10.40032 | 1125.24  | 10.40032 | 1125.242 | 10.40032 | 1125.242 | 10.44313 | 1115.542 |
| 1123.758 | 10.40259 | 1124.768 | 10.40259 | 1124.771 | 10.40259 | 1124.771 | 10.446   | 1114.834 |
| 1123.244 | 10.40497 | 1124.265 | 10.40497 | 1124.267 | 10.40497 | 1124.267 | 10.44886 | 1114.119 |
| 1122.596 | 10.40735 | 1123.756 | 10.40735 | 1123.759 | 10.40735 | 1123.759 | 10.45    | 1113.835 |
| 1122.045 | 10.40973 | 1123.243 | 10.40973 | 1123.246 | 10.40973 | 1123.246 | 10.45327 | 1113.011 |
| 1121.489 | 10.41272 | 1122.595 | 10.41272 | 1122.597 | 10.41272 | 1122.597 | 10.45627 | 1112.245 |
| 1120.976 | 10.41522 | 1122.044 | 10.41522 | 1122.047 | 10.41522 | 1122.047 | 10.45926 | 1111.472 |
| 1120.333 | 10.41772 | 1121.488 | 10.41771 | 1121.491 | 10.41771 | 1121.491 | 10.46043 | 1111.17  |
| 1119.732 | 10.42    | 1120.975 | 10.42    | 1120.978 | 10.42    | 1120.978 | 10.46342 | 1110.39  |
| 1119.126 | 10.42285 | 1120.332 | 10.42285 | 1120.334 | 10.42285 | 1120.334 | 10.46654 | 1109.564 |



|          |          |          |          |          |          |          |          |          |
|----------|----------|----------|----------|----------|----------|----------|----------|----------|
| 1118.764 | 10.42547 | 1119.731 | 10.42547 | 1119.734 | 10.42547 | 1119.734 | 10.46967 | 1108.729 |
| 1118.49  | 10.42809 | 1119.125 | 10.42809 | 1119.128 | 10.42809 | 1119.128 | 10.47357 | 1107.68  |
| 1118.149 | 10.43    | 1118.68  | 10.43    | 1118.683 | 10.43    | 1118.683 | 10.47683 | 1106.79  |
| 1117.809 | 10.43299 | 1117.979 | 10.43299 | 1117.982 | 10.43299 | 1117.982 | 10.48    | 1105.913 |
| 1117.513 | 10.43573 | 1117.327 | 10.43573 | 1117.329 | 10.43573 | 1117.329 | 10.48372 | 1104.881 |
| 1116.996 | 10.43847 | 1116.668 | 10.43847 | 1116.67  | 10.43847 | 1116.67  | 10.48711 | 1103.923 |
| 1116.627 | 10.44    | 1116.299 | 10.44    | 1116.301 | 10.44    | 1116.301 | 10.49    | 1103.101 |
| 1116.394 | 10.44313 | 1115.538 | 10.44313 | 1115.54  | 10.44313 | 1115.54  | 10.49388 | 1101.992 |
| 1115.975 | 10.44718 | 1114.535 | 10.446   | 1114.833 | 10.446   | 1114.833 | 10.49741 | 1100.964 |
| 1115.609 | 10.45    | 1113.838 | 10.44886 | 1114.118 | 10.44886 | 1114.118 | 10.5     | 1100.204 |
| 1115.349 | 10.45223 | 1113.289 | 10.45    | 1113.833 | 10.45    | 1113.833 | 10.50404 | 1099.014 |
| 1115.089 | 10.45357 | 1112.961 | 10.45327 | 1113.009 | 10.45327 | 1113.009 | 10.5059  | 1098.457 |
| 1114.83  | 10.45474 | 1112.675 | 10.45627 | 1112.244 | 10.45627 | 1112.244 | 10.5074  | 1098.014 |
| 1114.151 | 10.45679 | 1112.176 | 10.45926 | 1111.47  | 10.45926 | 1111.47  | 10.50994 | 1097.261 |
| 1113.857 | 10.45828 | 1111.816 | 10.46043 | 1111.168 | 10.46043 | 1111.168 | 10.51184 | 1096.697 |
| 1113.601 | 10.45976 | 1111.457 | 10.46342 | 1110.389 | 10.46342 | 1110.389 | 10.5135  | 1096.211 |
| 1113.193 | 10.4617  | 1110.989 | 10.46615 | 1109.667 | 10.46654 | 1109.562 | 10.51498 | 1095.775 |
| 1112.181 | 10.46318 | 1110.632 | 10.46916 | 1108.876 | 10.46967 | 1108.727 | 10.51647 | 1095.34  |
| 1111.954 | 10.46426 | 1110.375 | 10.47037 | 1108.559 | 10.47357 | 1107.678 | 10.5178  | 1094.949 |
| 1111.594 | 10.46533 | 1110.118 | 10.47294 | 1107.884 | 10.47683 | 1106.788 | 10.51914 | 1094.559 |
| 1111.283 | 10.4664  | 1109.862 | 10.47426 | 1107.541 | 10.48    | 1105.911 | 10.52019 | 1094.253 |
| 1111.011 | 10.46993 | 1109.024 | 10.47558 | 1107.199 | 10.48372 | 1104.879 | 10.52139 | 1093.904 |
| 1110.741 | 10.47165 | 1108.615 | 10.4769  | 1106.858 | 10.48574 | 1104.311 | 10.52326 | 1093.365 |
| 1110.269 | 10.47312 | 1108.27  | 10.48    | 1106.057 | 10.48746 | 1103.829 | 10.52745 | 1092.157 |
| 1109.804 | 10.4744  | 1107.969 | 10.48151 | 1105.67  | 10.48991 | 1103.146 | 10.53    | 1091.426 |
| 1109.54  | 10.47664 | 1107.444 | 10.48282 | 1105.333 | 10.4928  | 1102.342 | 10.53152 | 1090.994 |
| 1109.321 | 10.47866 | 1106.974 | 10.48384 | 1105.073 | 10.49406 | 1101.993 | 10.53285 | 1090.614 |
| 1108.946 | 10.48    | 1106.662 | 10.48485 | 1104.815 | 10.49532 | 1101.645 | 10.53402 | 1090.282 |
| 1108.433 | 10.48119 | 1106.386 | 10.48586 | 1104.557 | 10.49658 | 1101.298 | 10.53607 | 1089.703 |
| 1108.107 | 10.48219 | 1106.154 | 10.48932 | 1103.679 | 10.5     | 1100.357 | 10.53791 | 1089.183 |
| 1107.783 | 10.48397 | 1105.745 | 10.49049 | 1103.384 | 10.50144 | 1099.963 | 10.54    | 1088.594 |
| 1107.484 | 10.48641 | 1105.186 | 10.4916  | 1103.104 | 10.5027  | 1099.62  | 10.54109 | 1088.288 |
| 1107.12  | 10.48796 | 1104.831 | 10.49302 | 1102.749 | 10.50465 | 1099.091 | 10.54283 | 1087.802 |
| 1106.776 | 10.48951 | 1104.477 | 10.49425 | 1102.439 | 10.50901 | 1097.911 | 10.54447 | 1087.345 |
| 1106.476 | 10.49052 | 1104.249 | 10.49642 | 1101.899 | 10.51048 | 1097.515 | 10.54591 | 1086.947 |
| 1106.176 | 10.49194 | 1103.927 | 10.49837 | 1101.414 | 10.51156 | 1097.226 | 10.54734 | 1086.55  |
| 1105.656 | 10.49357 | 1103.56  | 10.5     | 1101.009 | 10.51294 | 1096.858 | 10.54877 | 1086.154 |
| 1105.369 | 10.49581 | 1103.056 | 10.50115 | 1100.725 | 10.51414 | 1096.537 | 10.55    | 1085.816 |
| 1105.009 | 10.49724 | 1102.737 | 10.50298 | 1100.274 | 10.51624 | 1095.977 | 10.55181 | 1085.318 |
| 1104.627 | 10.49866 | 1102.418 | 10.5047  | 1099.853 | 10.51814 | 1095.475 | 10.55334 | 1084.901 |
| 1104.103 | 10.5     | 1102.121 | 10.5062  | 1099.485 | 10.52    | 1094.983 | 10.55543 | 1084.33  |
| 1103.772 | 10.50101 | 1101.897 | 10.5077  | 1099.118 | 10.52112 | 1094.689 | 10.55676 | 1083.967 |
| 1103.533 | 10.5027  | 1101.522 | 10.50921 | 1098.753 | 10.5229  | 1094.221 | 10.5591  | 1083.334 |
| 1103.216 | 10.50431 | 1101.168 | 10.51021 | 1098.508 | 10.52457 | 1093.783 | 10.56033 | 1083     |
| 1102.854 | 10.50572 | 1100.859 | 10.51189 | 1098.104 | 10.52604 | 1093.401 | 10.56185 | 1082.593 |
| 1102.359 | 10.50713 | 1100.551 | 10.51348 | 1097.721 | 10.5275  | 1093.02  | 10.56288 | 1082.316 |
| 1102.046 | 10.50959 | 1100.014 | 10.51566 | 1097.197 | 10.52897 | 1092.641 | 10.5646  | 1081.856 |

|          |          |          |          |          |          |          |          |          |
|----------|----------|----------|----------|----------|----------|----------|----------|----------|
| 1101.692 | 10.51072 | 1099.769 | 10.51705 | 1096.865 | 10.53    | 1092.373 | 10.56696 | 1081.226 |
| 1101.463 | 10.512   | 1099.492 | 10.51844 | 1096.534 | 10.53185 | 1091.897 | 10.56846 | 1080.826 |
| 1101.259 | 10.51312 | 1099.25  | 10.52    | 1096.162 | 10.5334  | 1091.498 | 10.56997 | 1080.427 |
| 1101.055 | 10.51501 | 1098.843 | 10.52186 | 1095.721 | 10.53553 | 1090.951 | 10.57105 | 1080.142 |
| 1100.852 | 10.51762 | 1098.284 | 10.52362 | 1095.307 | 10.53689 | 1090.604 | 10.5728  | 1079.679 |
| 1100.498 | 10.51928 | 1097.931 | 10.52515 | 1094.946 | 10.53927 | 1090     | 10.57447 | 1079.242 |
| 1100.145 | 10.52057 | 1097.657 | 10.52669 | 1094.587 | 10.54034 | 1089.729 | 10.57593 | 1078.861 |
| 1099.794 | 10.52218 | 1097.318 | 10.52822 | 1094.228 | 10.54188 | 1089.34  | 10.57738 | 1078.48  |
| 1099.538 | 10.52402 | 1096.93  | 10.53    | 1093.814 | 10.54292 | 1089.077 | 10.57993 | 1077.817 |
| 1099.318 | 10.52655 | 1096.4   | 10.53107 | 1093.567 | 10.54467 | 1088.639 | 10.58142 | 1077.433 |
| 1099.098 | 10.52816 | 1096.064 | 10.53286 | 1093.152 | 10.54706 | 1088.04  | 10.58326 | 1076.958 |
| 1098.88  | 10.53    | 1095.682 | 10.53456 | 1092.761 | 10.54859 | 1087.66  | 10.58427 | 1076.701 |
| 1098.498 | 10.53119 | 1095.437 | 10.53605 | 1092.419 | 10.55    | 1087.309 | 10.58527 | 1076.443 |
| 1098.119 | 10.53225 | 1095.217 | 10.53754 | 1092.079 | 10.55106 | 1087.047 | 10.58627 | 1076.187 |
| 1097.93  | 10.53332 | 1094.999 | 10.54    | 1091.518 | 10.55284 | 1086.607 | 10.58803 | 1075.739 |
| 1097.666 | 10.53438 | 1094.78  | 10.54109 | 1091.27  | 10.55452 | 1086.193 | 10.58978 | 1075.293 |
| 1097.432 | 10.53625 | 1094.399 | 10.54306 | 1090.827 | 10.556   | 1085.831 | 10.59123 | 1074.926 |
| 1097.223 | 10.53811 | 1094.019 | 10.54576 | 1090.22  | 10.55747 | 1085.47  | 10.59232 | 1074.651 |
| 1097.014 | 10.53998 | 1093.642 | 10.54748 | 1089.836 | 10.56    | 1084.855 | 10.59428 | 1074.158 |
| 1096.806 | 10.54133 | 1093.37  | 10.54919 | 1089.453 | 10.56109 | 1084.592 | 10.5956  | 1073.827 |
| 1096.443 | 10.54251 | 1093.132 | 10.55025 | 1089.219 | 10.56304 | 1084.121 | 10.59682 | 1073.521 |
| 1096.125 | 10.54369 | 1092.896 | 10.55231 | 1088.763 | 10.56572 | 1083.477 | 10.59856 | 1073.086 |
| 1095.86  | 10.54487 | 1092.66  | 10.5534  | 1088.523 | 10.56742 | 1083.069 | 10.6     | 1072.729 |
| 1095.622 | 10.54694 | 1092.248 | 10.55449 | 1088.284 | 10.56913 | 1082.662 | 10.60104 | 1072.471 |
| 1095.386 | 10.54901 | 1091.838 | 10.55639 | 1087.867 | 10.57024 | 1082.397 | 10.60268 | 1072.065 |
| 1095.151 | 10.5503  | 1091.585 | 10.5583  | 1087.451 | 10.5723  | 1081.911 | 10.60638 | 1071.157 |
| 1094.741 | 10.55146 | 1091.358 | 10.56    | 1087.082 | 10.57338 | 1081.655 | 10.60926 | 1070.455 |
| 1094.434 | 10.55275 | 1091.105 | 10.56134 | 1086.791 | 10.57447 | 1081.401 | 10.61041 | 1070.176 |
| 1094.252 | 10.55391 | 1090.878 | 10.56253 | 1086.535 | 10.57636 | 1080.956 | 10.61201 | 1069.79  |
| 1094.048 | 10.55507 | 1090.652 | 10.56361 | 1086.304 | 10.57826 | 1080.513 | 10.61309 | 1069.528 |
| 1093.844 | 10.55623 | 1090.427 | 10.56468 | 1086.075 | 10.58    | 1080.108 | 10.61474 | 1069.132 |
| 1093.642 | 10.55827 | 1090.034 | 10.56575 | 1085.846 | 10.58134 | 1079.798 | 10.61701 | 1068.589 |
| 1093.166 | 10.56    | 1089.702 | 10.56763 | 1085.446 | 10.58252 | 1079.524 | 10.61846 | 1068.245 |
| 1092.694 | 10.56183 | 1089.353 | 10.5695  | 1085.048 | 10.58421 | 1079.136 | 10.6199  | 1067.902 |
| 1092.425 | 10.56295 | 1089.14  | 10.57155 | 1084.614 | 10.58605 | 1078.715 | 10.62092 | 1067.66  |
| 1092.123 | 10.56406 | 1088.927 | 10.57303 | 1084.305 | 10.59    | 1077.815 | 10.62244 | 1067.303 |
| 1091.823 | 10.56688 | 1088.396 | 10.57431 | 1084.036 | 10.59105 | 1077.578 | 10.62387 | 1066.966 |
| 1091.412 | 10.56969 | 1087.869 | 10.57545 | 1083.798 | 10.59265 | 1077.216 | 10.62513 | 1066.672 |
| 1091.153 | 10.57078 | 1087.665 | 10.57659 | 1083.561 | 10.59626 | 1076.408 | 10.62638 | 1066.378 |
| 1090.976 | 10.57212 | 1087.416 | 10.57773 | 1083.325 | 10.59906 | 1075.784 | 10.62764 | 1066.086 |
| 1090.717 | 10.5733  | 1087.199 | 10.58    | 1082.856 | 10.6004  | 1075.488 | 10.62983 | 1065.576 |
| 1090.474 | 10.57514 | 1086.859 | 10.5813  | 1082.588 | 10.60195 | 1075.147 | 10.63112 | 1065.279 |
| 1090.141 | 10.57768 | 1086.395 | 10.58244 | 1082.355 | 10.603   | 1074.916 | 10.63253 | 1064.955 |
| 1089.93  | 10.57929 | 1086.101 | 10.58422 | 1081.992 | 10.60459 | 1074.567 | 10.63396 | 1064.627 |
| 1089.72  | 10.58051 | 1085.881 | 10.58799 | 1081.226 | 10.60678 | 1074.09  | 10.63593 | 1064.177 |
| 1089.411 | 10.58185 | 1085.639 | 10.59    | 1080.822 | 10.60818 | 1073.787 | 10.63718 | 1063.892 |
| 1089.158 | 10.58338 | 1085.363 | 10.59135 | 1080.552 | 10.60957 | 1073.485 | 10.63843 | 1063.608 |

|          |          |          |          |          |          |          |          |          |
|----------|----------|----------|----------|----------|----------|----------|----------|----------|
| 1088.947 | 10.58549 | 1084.986 | 10.59254 | 1080.315 | 10.6109  | 1073.199 | 10.64    | 1063.254 |
| 1088.659 | 10.58683 | 1084.748 | 10.59358 | 1080.108 | 10.61237 | 1072.883 | 10.64161 | 1062.891 |
| 1088.476 | 10.58817 | 1084.51  | 10.5954  | 1079.746 | 10.61377 | 1072.583 | 10.64297 | 1062.586 |
| 1088.295 | 10.59    | 1084.187 | 10.59704 | 1079.423 | 10.615   | 1072.322 | 10.64484 | 1062.169 |
| 1087.978 | 10.59163 | 1083.902 | 10.59991 | 1078.86  | 10.61622 | 1072.062 | 10.64604 | 1061.904 |
| 1087.816 | 10.59299 | 1083.664 | 10.60129 | 1078.59  | 10.61745 | 1071.803 | 10.64812 | 1061.443 |
| 1087.62  | 10.59486 | 1083.339 | 10.60241 | 1078.372 | 10.61959 | 1071.351 | 10.65    | 1061.028 |
| 1087.379 | 10.59605 | 1083.133 | 10.60438 | 1077.992 | 10.6206  | 1071.139 | 10.65115 | 1060.777 |
| 1087.164 | 10.59724 | 1082.928 | 10.6061  | 1077.662 | 10.62161 | 1070.927 | 10.65263 | 1060.453 |
| 1086.976 | 10.59932 | 1082.57  | 10.60782 | 1077.332 | 10.62322 | 1070.592 | 10.65423 | 1060.105 |
| 1086.789 | 10.60059 | 1082.355 | 10.61    | 1076.917 | 10.62465 | 1070.295 | 10.65643 | 1059.628 |
| 1086.602 | 10.60159 | 1082.184 | 10.61181 | 1076.574 | 10.6259  | 1070.035 | 10.65784 | 1059.327 |
| 1086.365 | 10.6032  | 1081.913 | 10.61324 | 1076.305 | 10.62715 | 1069.777 | 10.65924 | 1059.026 |
| 1086.124 | 10.60463 | 1081.671 | 10.61521 | 1075.936 | 10.62841 | 1069.519 | 10.66049 | 1058.759 |
| 1085.922 | 10.60589 | 1081.46  | 10.61646 | 1075.702 | 10.63    | 1069.193 | 10.66186 | 1058.467 |
| 1085.645 | 10.60715 | 1081.25  | 10.61771 | 1075.47  | 10.63162 | 1068.862 | 10.66343 | 1058.134 |
| 1085.47  | 10.60841 | 1081.041 | 10.61991 | 1075.064 | 10.63299 | 1068.584 | 10.66559 | 1057.678 |
| 1085.165 | 10.61    | 1080.777 | 10.62115 | 1074.836 | 10.63488 | 1068.203 | 10.66697 | 1057.389 |
| 1084.923 | 10.61164 | 1080.507 | 10.62261 | 1074.568 | 10.63608 | 1067.962 | 10.66937 | 1056.887 |
| 1084.755 | 10.61303 | 1080.28  | 10.62413 | 1074.291 | 10.63818 | 1067.542 | 10.67071 | 1056.609 |
| 1084.538 | 10.61494 | 1079.969 | 10.62622 | 1073.913 | 10.64    | 1067.179 | 10.672   | 1056.343 |
| 1084.304 | 10.61615 | 1079.772 | 10.62755 | 1073.673 | 10.64116 | 1066.948 | 10.67312 | 1056.112 |
| 1083.983 | 10.61828 | 1079.43  | 10.62888 | 1073.434 | 10.64267 | 1066.651 | 10.67506 | 1055.715 |
| 1083.78  | 10.62    | 1079.155 | 10.63    | 1073.234 | 10.6443  | 1066.33  | 10.67772 | 1055.173 |
| 1083.579 | 10.62118 | 1078.966 | 10.63176 | 1072.921 | 10.64654 | 1065.892 | 10.67942 | 1054.83  |
| 1083.395 | 10.62272 | 1078.723 | 10.63325 | 1072.658 | 10.64797 | 1065.615 | 10.68059 | 1054.594 |
| 1083.159 | 10.6244  | 1078.459 | 10.63529 | 1072.298 | 10.6494  | 1065.338 | 10.68225 | 1054.26  |
| 1082.936 | 10.6267  | 1078.099 | 10.63659 | 1072.07  | 10.6505  | 1065.127 | 10.68416 | 1053.881 |
| 1082.742 | 10.62817 | 1077.871 | 10.63887 | 1071.673 | 10.6519  | 1064.858 | 10.68678 | 1053.362 |
| 1082.55  | 10.62964 | 1077.644 | 10.64    | 1071.478 | 10.6535  | 1064.552 | 10.68844 | 1053.034 |
| 1082.216 | 10.63103 | 1077.43  | 10.64128 | 1071.257 | 10.65571 | 1064.132 | 10.69    | 1052.729 |
| 1082.018 | 10.63278 | 1077.163 | 10.64295 | 1070.971 | 10.65711 | 1063.867 | 10.69124 | 1052.487 |
| 1081.776 | 10.63443 | 1076.913 | 10.64478 | 1070.66  | 10.65957 | 1063.405 | 10.69236 | 1052.27  |
| 1081.644 | 10.63587 | 1076.695 | 10.64729 | 1070.234 | 10.66073 | 1063.19  | 10.69348 | 1052.054 |
| 1081.512 | 10.63732 | 1076.478 | 10.64889 | 1069.966 | 10.66204 | 1062.945 | 10.6946  | 1051.839 |
| 1081.381 | 10.63985 | 1076.101 | 10.65    | 1069.78  | 10.66319 | 1062.733 | 10.69655 | 1051.464 |
| 1081.153 | 10.64143 | 1075.868 | 10.65113 | 1069.592 | 10.66518 | 1062.367 | 10.69851 | 1051.091 |
| 1080.929 | 10.64329 | 1075.594 | 10.65213 | 1069.426 | 10.6679  | 1061.869 | 10.7     | 1050.808 |
| 1080.772 | 10.64431 | 1075.445 | 10.65393 | 1069.129 | 10.66964 | 1061.554 | 10.7014  | 1050.544 |
| 1080.632 | 10.64534 | 1075.296 | 10.65641 | 1068.723 | 10.67122 | 1061.268 | 10.70266 | 1050.309 |
| 1080.508 | 10.64636 | 1075.148 | 10.65798 | 1068.466 | 10.67231 | 1061.074 | 10.70391 | 1050.076 |
| 1080.384 | 10.64815 | 1074.891 | 10.66    | 1068.14  | 10.67426 | 1060.725 | 10.70516 | 1049.843 |
| 1080.26  | 10.64995 | 1074.634 | 10.66118 | 1067.951 | 10.67694 | 1060.25  | 10.70735 | 1049.438 |
| 1080.045 | 10.65126 | 1074.448 | 10.66224 | 1067.781 | 10.67865 | 1059.949 | 10.70954 | 1049.036 |
| 1079.832 | 10.65238 | 1074.29  | 10.6633  | 1067.613 | 10.68    | 1059.712 | 10.71076 | 1048.813 |
| 1079.711 | 10.65339 | 1074.148 | 10.66436 | 1067.444 | 10.68127 | 1059.491 | 10.71292 | 1048.422 |
| 1079.555 | 10.65439 | 1074.007 | 10.66622 | 1067.151 | 10.68242 | 1059.292 | 10.71399 | 1048.23  |

|          |          |          |          |          |          |          |          |          |
|----------|----------|----------|----------|----------|----------|----------|----------|----------|
| 1079.415 | 10.6554  | 1073.867 | 10.66807 | 1066.86  | 10.68356 | 1059.095 | 10.7151  | 1048.031 |
| 1079.275 | 10.65716 | 1073.623 | 10.67    | 1066.56  | 10.68471 | 1058.898 | 10.7168  | 1047.727 |
| 1079.137 | 10.65893 | 1073.38  | 10.67134 | 1066.354 | 10.68671 | 1058.555 | 10.71788 | 1047.535 |
| 1078.896 | 10.66    | 1073.233 | 10.67253 | 1066.17  | 10.68871 | 1058.215 | 10.71897 | 1047.343 |
| 1078.658 | 10.66131 | 1073.054 | 10.67372 | 1065.988 | 10.69    | 1057.997 | 10.72    | 1047.161 |
| 1078.518 | 10.66249 | 1072.895 | 10.67491 | 1065.806 | 10.69144 | 1057.756 | 10.72124 | 1046.944 |
| 1078.383 | 10.66368 | 1072.736 | 10.677   | 1065.49  | 10.69272 | 1057.542 | 10.72239 | 1046.743 |
| 1078.234 | 10.66486 | 1072.578 | 10.67909 | 1065.177 | 10.694   | 1057.329 | 10.72354 | 1046.543 |
| 1078.087 | 10.66693 | 1072.303 | 10.6803  | 1064.996 | 10.69528 | 1057.118 | 10.72469 | 1046.344 |
| 1077.94  | 10.66899 | 1072.03  | 10.68148 | 1064.821 | 10.69753 | 1056.749 | 10.72872 | 1045.653 |
| 1077.685 | 10.67    | 1071.898 | 10.68279 | 1064.627 | 10.69977 | 1056.383 | 10.73    | 1045.435 |
| 1077.451 | 10.67148 | 1071.706 | 10.68411 | 1064.435 | 10.70078 | 1056.219 | 10.73119 | 1045.234 |
| 1077.275 | 10.67281 | 1071.535 | 10.68543 | 1064.243 | 10.70299 | 1055.864 | 10.73227 | 1045.053 |
| 1077.121 | 10.67413 | 1071.366 | 10.68773 | 1063.91  | 10.7044  | 1055.64  | 10.73334 | 1044.873 |
| 1076.983 | 10.67545 | 1071.197 | 10.69    | 1063.583 | 10.70581 | 1055.417 | 10.73523 | 1044.56  |
| 1076.846 | 10.67777 | 1070.905 | 10.69162 | 1063.353 | 10.70827 | 1055.029 | 10.73685 | 1044.292 |
| 1076.711 | 10.68    | 1070.625 | 10.69306 | 1063.151 | 10.71    | 1054.758 | 10.73847 | 1044.026 |
| 1076.475 | 10.68163 | 1070.422 | 10.69435 | 1062.97  | 10.71173 | 1054.49  | 10.74    | 1043.778 |
| 1076.327 | 10.68309 | 1070.244 | 10.69564 | 1062.79  | 10.71326 | 1054.255 | 10.74186 | 1043.477 |
| 1076.087 | 10.68439 | 1070.085 | 10.69693 | 1062.611 | 10.71427 | 1054.1   | 10.74348 | 1043.217 |
| 1075.936 | 10.6857  | 1069.927 | 10.6992  | 1062.299 | 10.71538 | 1053.931 | 10.74494 | 1042.984 |
| 1075.787 | 10.687   | 1069.77  | 10.70032 | 1062.145 | 10.71769 | 1053.581 | 10.7464  | 1042.752 |
| 1075.528 | 10.68929 | 1069.497 | 10.70167 | 1061.962 | 10.71916 | 1053.361 | 10.74786 | 1042.522 |
| 1075.432 | 10.69033 | 1069.374 | 10.70317 | 1061.76  | 10.72021 | 1053.204 | 10.75    | 1042.188 |
| 1075.252 | 10.69169 | 1069.214 | 10.70468 | 1061.559 | 10.72168 | 1052.985 | 10.75167 | 1041.928 |
| 1075.095 | 10.69321 | 1069.037 | 10.70618 | 1061.36  | 10.72296 | 1052.796 | 10.7531  | 1041.709 |
| 1074.939 | 10.69473 | 1068.861 | 10.70881 | 1061.014 | 10.72425 | 1052.608 | 10.75453 | 1041.491 |
| 1074.785 | 10.69625 | 1068.687 | 10.71    | 1060.858 | 10.72553 | 1052.421 | 10.75596 | 1041.274 |
| 1074.519 | 10.69891 | 1068.385 | 10.71187 | 1060.617 | 10.73    | 1051.778 | 10.76    | 1040.666 |
| 1074.425 | 10.7     | 1068.263 | 10.71353 | 1060.405 | 10.73147 | 1051.569 | 10.76163 | 1040.424 |
| 1074.333 | 10.70189 | 1068.053 | 10.71457 | 1060.272 | 10.73282 | 1051.378 | 10.76315 | 1040.202 |
| 1074.175 | 10.70357 | 1067.868 | 10.71597 | 1060.094 | 10.73418 | 1051.188 | 10.76466 | 1039.982 |
| 1074.034 | 10.70525 | 1067.685 | 10.71727 | 1059.932 | 10.73554 | 1051     | 10.76617 | 1039.763 |
| 1073.894 | 10.70693 | 1067.504 | 10.71856 | 1059.771 | 10.74    | 1050.387 | 10.77    | 1039.216 |
| 1073.757 | 10.70988 | 1067.191 | 10.72    | 1059.593 | 10.74155 | 1050.177 | 10.77173 | 1038.972 |
| 1073.663 | 10.71102 | 1067.071 | 10.72148 | 1059.41  | 10.743   | 1049.983 | 10.77334 | 1038.748 |
| 1073.509 | 10.71206 | 1066.962 | 10.72286 | 1059.242 | 10.74445 | 1049.79  | 10.77494 | 1038.526 |
| 1073.341 | 10.71388 | 1066.774 | 10.72424 | 1059.076 | 10.7459  | 1049.599 | 10.77655 | 1038.306 |
| 1073.248 | 10.71496 | 1066.663 | 10.72562 | 1058.91  | 10.75    | 1049.064 | 10.78    | 1037.838 |
| 1073.133 | 10.71613 | 1066.544 | 10.73    | 1058.392 | 10.75166 | 1048.852 | 10.78184 | 1037.593 |
| 1073.026 | 10.71725 | 1066.431 | 10.73158 | 1058.208 | 10.7532  | 1048.656 | 10.78354 | 1037.368 |
| 1072.874 | 10.71899 | 1066.256 | 10.73305 | 1058.039 | 10.75474 | 1048.462 | 10.78524 | 1037.146 |
| 1072.79  | 10.72    | 1066.156 | 10.73452 | 1057.871 | 10.75628 | 1048.27  | 10.78694 | 1036.926 |
| 1072.674 | 10.72111 | 1066.047 | 10.73599 | 1057.704 | 10.76    | 1047.812 | 10.79    | 1036.535 |
| 1072.56  | 10.72257 | 1065.904 | 10.74    | 1057.258 | 10.76176 | 1047.598 | 10.79194 | 1036.289 |
| 1072.447 | 10.72403 | 1065.763 | 10.74168 | 1057.073 | 10.7634  | 1047.402 | 10.79374 | 1036.066 |
| 1072.151 | 10.72549 | 1065.623 | 10.74325 | 1056.904 | 10.76504 | 1047.208 | 10.79554 | 1035.845 |

|          |          |          |          |          |          |          |          |          |
|----------|----------|----------|----------|----------|----------|----------|----------|----------|
| 1072.028 | 10.73    | 1065.2   | 10.74482 | 1056.736 | 10.76668 | 1047.016 | 10.79734 | 1035.627 |
| 1071.914 | 10.73167 | 1065.046 | 10.74639 | 1056.57  | 10.77    | 1046.631 | 10.8     | 1035.307 |
| 1071.803 | 10.73326 | 1064.903 | 10.75    | 1056.193 | 10.77187 | 1046.417 | 10.80205 | 1035.064 |
| 1071.693 | 10.73484 | 1064.761 | 10.75179 | 1056.008 | 10.77361 | 1046.222 | 10.80395 | 1034.843 |
| 1071.495 | 10.73643 | 1064.621 | 10.75346 | 1055.84  | 10.77534 | 1046.03  | 10.80584 | 1034.626 |
| 1071.375 | 10.74    | 1064.311 | 10.75512 | 1055.674 | 10.77707 | 1045.84  | 10.80774 | 1034.411 |
| 1071.267 | 10.74181 | 1064.157 | 10.75678 | 1055.51  | 10.78    | 1045.523 | 10.81    | 1034.158 |
| 1071.161 | 10.7435  | 1064.016 | 10.76    | 1055.197 | 10.78198 | 1045.311 | 10.81217 | 1033.918 |
| 1071.058 | 10.74518 | 1063.878 | 10.7619  | 1055.015 | 10.78381 | 1045.119 | 10.81416 | 1033.702 |
| 1070.908 | 10.74687 | 1063.741 | 10.76366 | 1054.85  | 10.78565 | 1044.93  | 10.81615 | 1033.49  |
| 1070.795 | 10.75    | 1063.491 | 10.76543 | 1054.688 | 10.78748 | 1044.743 | 10.81814 | 1033.281 |
| 1070.695 | 10.75193 | 1063.34  | 10.76719 | 1054.527 | 10.79    | 1044.489 | 10.82    | 1033.088 |
| 1070.597 | 10.75371 | 1063.204 | 10.77    | 1054.274 | 10.79209 | 1044.282 | 10.82228 | 1032.854 |
| 1070.502 | 10.75549 | 1063.071 | 10.77201 | 1054.096 | 10.79402 | 1044.095 | 10.82437 | 1032.646 |
| 1070.392 | 10.75728 | 1062.939 | 10.77387 | 1053.936 | 10.79595 | 1043.911 | 10.82646 | 1032.44  |
| 1070.289 | 10.76    | 1062.742 | 10.77573 | 1053.778 | 10.79788 | 1043.729 | 10.82856 | 1032.239 |
| 1070.198 | 10.76204 | 1062.596 | 10.7776  | 1053.622 | 10.8     | 1043.533 | 10.83    | 1032.101 |
| 1070.11  | 10.76392 | 1062.467 | 10.78    | 1053.424 | 10.80221 | 1043.331 | 10.83239 | 1031.875 |
| 1070.025 | 10.76581 | 1062.339 | 10.78213 | 1053.252 | 10.80424 | 1043.151 | 10.83458 | 1031.675 |
| 1069.949 | 10.76769 | 1062.215 | 10.78409 | 1053.098 | 10.80627 | 1042.973 | 10.83678 | 1031.479 |
| 1069.857 | 10.77    | 1062.064 | 10.78605 | 1052.947 | 10.8083  | 1042.8   | 10.83897 | 1031.287 |
| 1069.777 | 10.77215 | 1061.927 | 10.78801 | 1052.799 | 10.81    | 1042.655 | 10.84    | 1031.198 |
| 1069.701 | 10.77414 | 1061.805 | 10.79    | 1052.65  | 10.81232 | 1042.461 | 10.84251 | 1030.983 |
| 1069.628 | 10.77612 | 1061.686 | 10.79224 | 1052.486 | 10.81445 | 1042.289 | 10.8448  | 1030.794 |
| 1069.58  | 10.77811 | 1061.57  | 10.7943  | 1052.34  | 10.81658 | 1042.121 | 10.8471  | 1030.609 |
| 1069.501 | 10.78    | 1061.461 | 10.79636 | 1052.197 | 10.81871 | 1041.957 | 10.84939 | 1030.429 |
| 1069.435 | 10.78227 | 1061.333 | 10.79843 | 1052.058 | 10.82    | 1041.858 | 10.85262 | 1030.18  |
| 1069.372 | 10.78435 | 1061.221 | 10.8     | 1051.953 | 10.82244 | 1041.675 | 10.85502 | 1030.004 |
| 1069.314 | 10.78644 | 1061.112 | 10.80236 | 1051.799 | 10.82467 | 1041.514 | 10.85742 | 1029.834 |
| 1069.28  | 10.78853 | 1061.007 | 10.80452 | 1051.663 | 10.8269  | 1041.356 | 10.85981 | 1029.668 |
| 1069.225 | 10.79    | 1060.934 | 10.80668 | 1051.532 | 10.82913 | 1041.204 | 10.86274 | 1029.47  |
| 1069.174 | 10.79238 | 1060.818 | 10.80885 | 1051.403 | 10.83032 | 1041.123 | 10.86524 | 1029.31  |
| 1069.128 | 10.79458 | 1060.718 | 10.81    | 1051.336 | 10.83255 | 1040.974 | 10.86774 | 1029.155 |
| 1069.085 | 10.79677 | 1060.621 | 10.81247 | 1051.194 | 10.83489 | 1040.826 | 10.87    | 1029.021 |
| 1069.031 | 10.79896 | 1060.528 | 10.81474 | 1051.071 | 10.83722 | 1040.682 | 10.87286 | 1028.854 |
| 1068.998 | 10.8     | 1060.485 | 10.81701 | 1050.952 | 10.83956 | 1040.543 | 10.87546 | 1028.713 |
| 1068.969 | 10.8025  | 1060.383 | 10.81927 | 1050.837 | 10.84267 | 1040.362 | 10.87806 | 1028.578 |
| 1068.946 | 10.8048  | 1060.297 | 10.82032 | 1050.785 | 10.84511 | 1040.229 | 10.88    | 1028.481 |
| 1068.921 | 10.80709 | 1060.215 | 10.82259 | 1050.674 | 10.84755 | 1040.101 | 10.88298 | 1028.336 |
| 1068.908 | 10.80939 | 1060.137 | 10.82496 | 1050.565 | 10.84999 | 1039.978 | 10.88568 | 1028.216 |
| 1068.9   | 10.81262 | 1060.031 | 10.82733 | 1050.461 | 10.85279 | 1039.84  | 10.88839 | 1028.104 |
| 1068.897 | 10.81502 | 1059.961 | 10.8297  | 1050.362 | 10.85533 | 1039.725 | 10.89    | 1028.039 |
| 1068.897 | 10.81742 | 1059.896 | 10.83271 | 1050.24  | 10.85788 | 1039.616 | 10.89309 | 1027.92  |
| 1068.906 | 10.81982 | 1059.836 | 10.83519 | 1050.149 | 10.86    | 1039.529 | 10.8959  | 1027.824 |
| 1068.922 | 10.82274 | 1059.765 | 10.83766 | 1050.063 | 10.86291 | 1039.413 | 10.89871 | 1027.737 |
| 1068.936 | 10.82525 | 1059.714 | 10.84    | 1049.986 | 10.86556 | 1039.318 | 10.9     | 1027.699 |
| 1068.962 | 10.82776 | 1059.668 | 10.84283 | 1049.896 | 10.8682  | 1039.23  | 10.90321 | 1027.608 |

|          |          |          |          |          |          |          |          |          |
|----------|----------|----------|----------|----------|----------|----------|----------|----------|
| 1068.997 | 10.83    | 1059.631 | 10.84541 | 1049.825 | 10.87    | 1039.173 | 10.90612 | 1027.541 |
| 1069.039 | 10.83286 | 1059.587 | 10.84799 | 1049.759 | 10.87303 | 1039.081 | 10.90903 | 1027.482 |
| 1069.064 | 10.83548 | 1059.557 | 10.85    | 1049.711 | 10.87578 | 1039.01  | 10.91042 | 1027.456 |
| 1069.12  | 10.83809 | 1059.533 | 10.85295 | 1049.645 | 10.87853 | 1038.946 | 10.91333 | 1027.406 |
| 1069.184 | 10.84    | 1059.519 | 10.85564 | 1049.595 | 10.88    | 1038.914 | 10.91634 | 1027.37  |
| 1069.255 | 10.84299 | 1059.5   | 10.85833 | 1049.553 | 10.88315 | 1038.85  | 10.91935 | 1027.343 |
| 1069.285 | 10.84571 | 1059.494 | 10.86    | 1049.529 | 10.886   | 1038.806 | 10.92043 | 1027.335 |
| 1069.374 | 10.84843 | 1059.495 | 10.86307 | 1049.489 | 10.88886 | 1038.769 | 10.92344 | 1027.316 |
| 1069.469 | 10.85    | 1059.498 | 10.86586 | 1049.464 | 10.89    | 1038.756 | 10.92655 | 1027.315 |
| 1069.573 | 10.85311 | 1059.507 | 10.86866 | 1049.448 | 10.89327 | 1038.723 | 10.92966 | 1027.325 |
| 1069.618 | 10.85593 | 1059.528 | 10.87    | 1049.442 | 10.89622 | 1038.708 | 10.93355 | 1027.345 |
| 1069.728 | 10.85876 | 1059.556 | 10.87319 | 1049.431 | 10.89918 | 1038.703 | 10.93675 | 1027.382 |
| 1069.858 | 10.86    | 1059.571 | 10.87609 | 1049.436 | 10.90042 | 1038.702 | 10.93996 | 1027.431 |
| 1069.997 | 10.86323 | 1059.611 | 10.87899 | 1049.448 | 10.90338 | 1038.704 | 10.94366 | 1027.495 |
| 1070.185 | 10.86616 | 1059.662 | 10.88    | 1049.454 | 10.90644 | 1038.722 | 10.94695 | 1027.574 |
| 1070.353 | 10.86909 | 1059.722 | 10.88331 | 1049.477 | 10.9095  | 1038.751 | 10.95    | 1027.659 |
| 1070.531 | 10.87042 | 1059.75  | 10.88631 | 1049.513 | 10.9135  | 1038.797 | 10.95376 | 1027.771 |
| 1070.75  | 10.87335 | 1059.817 | 10.88931 | 1049.558 | 10.91665 | 1038.852 | 10.95713 | 1027.896 |
| 1070.959 | 10.87639 | 1059.901 | 10.89043 | 1049.576 | 10.91981 | 1038.918 | 10.96    | 1028.013 |
| 1071.169 | 10.87942 | 1059.995 | 10.89343 | 1049.628 | 10.92361 | 1039.006 | 10.96385 | 1028.178 |
| 1071.426 | 10.88043 | 1060.027 | 10.89653 | 1049.699 | 10.92686 | 1039.101 | 10.96729 | 1028.351 |
| 1071.679 | 10.88347 | 1060.128 | 10.89963 | 1049.781 | 10.93    | 1039.205 | 10.97    | 1028.498 |
| 1071.908 | 10.88661 | 1060.248 | 10.90354 | 1049.891 | 10.93371 | 1039.335 | 10.97393 | 1028.719 |
| 1072.217 | 10.88974 | 1060.38  | 10.90674 | 1050     | 10.93705 | 1039.474 | 10.97743 | 1028.945 |
| 1072.517 | 10.89359 | 1060.547 | 10.90994 | 1050.121 | 10.94    | 1039.608 | 10.98    | 1029.12  |
| 1072.764 | 10.89682 | 1060.708 | 10.91366 | 1050.269 | 10.94381 | 1039.789 | 10.984   | 1029.401 |
| 1073.127 | 10.9     | 1060.877 | 10.91695 | 1050.42  | 10.94722 | 1039.975 | 10.98756 | 1029.682 |
| 1073.477 | 10.9037  | 1061.081 | 10.92    | 1050.571 | 10.95    | 1040.137 | 10.99    | 1029.884 |
| 1073.74  | 10.90702 | 1061.284 | 10.92376 | 1050.765 | 10.9539  | 1040.372 | 10.99406 | 1030.229 |
| 1074.162 | 10.91    | 1061.477 | 10.92714 | 1050.961 | 10.95738 | 1040.608 | 10.99765 | 1030.566 |
| 1074.564 | 10.9138  | 1061.73  | 10.93    | 1051.138 | 10.96    | 1040.795 | 11       | 1030.795 |
| 1074.842 | 10.91721 | 1061.98  | 10.93386 | 1051.383 | 10.96398 | 1041.088 | 11.00345 | 1031.14  |
| 1075.324 | 10.92    | 1062.195 | 10.93731 | 1051.628 | 10.96752 | 1041.378 | 11.0046  | 1031.26  |
| 1075.781 | 10.9239  | 1062.501 | 10.94    | 1051.828 | 10.97    | 1041.589 | 11.00634 | 1031.444 |
| 1076.075 | 10.92738 | 1062.801 | 10.94394 | 1052.13  | 10.97405 | 1041.944 | 11.00814 | 1031.637 |
| 1076.62  | 10.93    | 1063.034 | 10.94746 | 1052.426 | 10.97764 | 1042.289 | 11.00994 | 1031.834 |
| 1077.131 | 10.93398 | 1063.398 | 10.95    | 1052.647 | 10.98    | 1042.524 | 11.01094 | 1031.946 |
| 1077.443 | 10.93754 | 1063.75  | 10.95402 | 1053.008 | 10.9841  | 1042.943 | 11.01222 | 1032.09  |
| 1078.052 | 10.94    | 1064.001 | 10.9576  | 1053.358 | 10.98772 | 1043.344 | 11.01349 | 1032.235 |
| 1078.871 | 10.94406 | 1064.425 | 10.96    | 1053.601 | 10.99    | 1043.606 | 11.0146  | 1032.362 |
| 1079.029 | 10.94767 | 1064.831 | 10.96409 | 1054.024 | 10.99172 | 1043.805 | 11.0157  | 1032.492 |
| 1079.226 | 10.95    | 1065.101 | 10.96771 | 1054.429 | 10.99324 | 1043.985 | 11.01707 | 1032.653 |
| 1079.458 | 10.95412 | 1065.587 | 10.97    | 1054.694 | 10.99438 | 1044.122 | 11.01843 | 1032.817 |
| 1079.648 | 10.95777 | 1066.048 | 10.97414 | 1055.181 | 10.9958  | 1044.295 | 11.01979 | 1032.982 |
| 1079.839 | 10.96    | 1066.338 | 10.97778 | 1055.642 | 10.99705 | 1044.448 | 11.02156 | 1033.199 |
| 1080.032 | 10.96416 | 1066.889 | 10.98    | 1055.932 | 10.99878 | 1044.663 | 11.0231  | 1033.393 |
| 1080.207 | 10.96969 | 1067.683 | 10.98158 | 1056.14  | 11       | 1044.817 | 11.02541 | 1033.688 |

|          |          |          |          |          |          |          |          |          |
|----------|----------|----------|----------|----------|----------|----------|----------|----------|
| 1080.524 | 10.97095 | 1067.866 | 10.98279 | 1056.301 | 11.00106 | 1044.951 | 11.02695 | 1033.887 |
| 1080.698 | 10.97216 | 1068.044 | 10.98381 | 1056.439 | 11.00219 | 1045.097 | 11.02848 | 1034.089 |
| 1080.897 | 10.9736  | 1068.257 | 10.9852  | 1056.627 | 11.00386 | 1045.314 | 11.03    | 1034.292 |
| 1081.172 | 10.97489 | 1068.449 | 10.98683 | 1056.85  | 11.00496 | 1045.459 | 11.03175 | 1034.529 |
| 1081.349 | 10.97602 | 1068.619 | 10.98809 | 1057.025 | 11.00631 | 1045.639 | 11.03294 | 1034.692 |
| 1081.661 | 10.97747 | 1068.839 | 10.98955 | 1057.23  | 11.00766 | 1045.821 | 11.03413 | 1034.858 |
| 1081.852 | 10.97896 | 1069.068 | 10.99092 | 1057.426 | 11.009   | 1046.005 | 11.03531 | 1035.025 |
| 1082.145 | 10.98    | 1069.23  | 10.99241 | 1057.64  | 11.01019 | 1046.169 | 11.03754 | 1035.341 |
| 1082.326 | 10.98159 | 1069.479 | 10.99415 | 1057.893 | 11.0117  | 1046.379 | 11.03976 | 1035.663 |
| 1082.644 | 10.98334 | 1069.757 | 10.9952  | 1058.049 | 11.01312 | 1046.581 | 11.04232 | 1036.043 |
| 1082.878 | 10.98442 | 1069.931 | 10.99626 | 1058.207 | 11.01508 | 1046.862 | 11.04431 | 1036.347 |
| 1083.306 | 10.9855  | 1070.105 | 10.99841 | 1058.529 | 11.01633 | 1047.043 | 11.04703 | 1036.768 |
| 1083.588 | 10.98763 | 1070.451 | 11       | 1058.772 | 11.01851 | 1047.364 | 11.04975 | 1037.199 |
| 1084.175 | 10.98975 | 1070.802 | 11.00117 | 1058.952 | 11.02    | 1047.586 | 11.05231 | 1037.61  |
| 1084.506 | 10.99116 | 1071.039 | 11.00269 | 1059.188 | 11.02249 | 1047.963 | 11.05356 | 1037.812 |
| 1084.8   | 10.99267 | 1071.294 | 11.00433 | 1059.447 | 11.02357 | 1048.13  | 11.05549 | 1038.131 |
| 1085.033 | 10.99436 | 1071.584 | 11.00659 | 1059.808 | 11.02465 | 1048.297 | 11.05695 | 1038.374 |
| 1085.268 | 10.99668 | 1071.986 | 11.00803 | 1060.04  | 11.02573 | 1048.466 | 11.05802 | 1038.553 |
| 1085.656 | 10.99816 | 1072.245 | 11.01    | 1060.363 | 11.02817 | 1048.858 | 11.0596  | 1038.819 |
| 1086.048 | 11       | 1072.571 | 11.01164 | 1060.635 | 11.02996 | 1049.148 | 11.06061 | 1038.99  |
| 1086.597 | 11.00169 | 1072.873 | 11.01308 | 1060.877 | 11.03205 | 1049.488 | 11.06213 | 1039.249 |
| 1087.113 | 11.00317 | 1073.142 | 11.01428 | 1061.08  | 11.03476 | 1049.943 | 11.06342 | 1039.471 |
| 1087.637 | 11.0044  | 1073.368 | 11.01548 | 1061.285 | 11.03747 | 1050.407 | 11.06521 | 1039.78  |
| 1088.169 | 11.0063  | 1073.721 | 11.01738 | 1061.616 | 11.04    | 1050.849 | 11.067   | 1040.093 |
| 1088.847 | 11.0082  | 1074.078 | 11.01928 | 1061.95  | 11.0431  | 1051.394 | 11.06871 | 1040.392 |
| 1089.355 | 11.01    | 1074.419 | 11.02218 | 1062.463 | 11.04454 | 1051.653 | 11.07    | 1040.62  |
| 1089.832 | 11.01217 | 1074.835 | 11.02496 | 1062.971 | 11.046   | 1051.917 | 11.07134 | 1040.858 |
| 1090.122 | 11.01483 | 1075.355 | 11.02774 | 1063.489 | 11.04778 | 1052.243 | 11.07271 | 1041.102 |
| 1090.431 | 11.01749 | 1075.884 | 11.03    | 1063.916 | 11.04909 | 1052.483 | 11.07395 | 1041.326 |
| 1090.744 | 11.02    | 1076.39  | 11.03318 | 1064.521 | 11.05044 | 1052.733 | 11.07504 | 1041.523 |
| 1090.992 | 11.02304 | 1077.008 | 11.03436 | 1064.75  | 11.05169 | 1052.966 | 11.07613 | 1041.72  |
| 1091.362 | 11.02568 | 1077.561 | 11.03571 | 1065.012 | 11.0527  | 1053.154 | 11.07722 | 1041.919 |
| 1091.795 | 11.0268  | 1077.795 | 11.03678 | 1065.223 | 11.05435 | 1053.464 | 11.07913 | 1042.268 |
| 1092.039 | 11.02823 | 1078.097 | 11.03785 | 1065.435 | 11.05605 | 1053.787 | 11.08027 | 1042.479 |
| 1092.283 | 11.02935 | 1078.336 | 11.0389  | 1065.644 | 11.05716 | 1053.998 | 11.08152 | 1042.711 |
| 1092.739 | 11.03038 | 1078.556 | 11.04    | 1065.863 | 11.05905 | 1054.362 | 11.08313 | 1043.011 |
| 1092.977 | 11.03233 | 1078.974 | 11.04132 | 1066.129 | 11.06012 | 1054.566 | 11.08463 | 1043.294 |
| 1093.264 | 11.03419 | 1079.376 | 11.04278 | 1066.423 | 11.06141 | 1054.816 | 11.08595 | 1043.543 |
| 1093.769 | 11.03524 | 1079.603 | 11.04465 | 1066.803 | 11.06253 | 1055.036 | 11.08727 | 1043.793 |
| 1094.227 | 11.03628 | 1079.831 | 11.04584 | 1067.046 | 11.06451 | 1055.421 | 11.08958 | 1044.234 |
| 1094.687 | 11.03796 | 1080.199 | 11.04803 | 1067.495 | 11.06624 | 1055.763 | 11.0924  | 1044.782 |
| 1095.115 | 11.03941 | 1080.518 | 11.04982 | 1067.866 | 11.06798 | 1056.107 | 11.09425 | 1045.143 |
| 1095.357 | 11.04084 | 1080.833 | 11.05093 | 1068.098 | 11.07    | 1056.511 | 11.09623 | 1045.534 |
| 1095.665 | 11.0422  | 1081.136 | 11.05209 | 1068.341 | 11.07144 | 1056.801 | 11.09821 | 1045.927 |
| 1095.991 | 11.04345 | 1081.417 | 11.05471 | 1068.89  | 11.07299 | 1057.113 | 11.1     | 1046.286 |
| 1096.441 | 11.04583 | 1081.95  | 11.05648 | 1069.267 | 11.07444 | 1057.41  | 11.10226 | 1046.74  |
| 1096.729 | 11.0477  | 1082.376 | 11.05826 | 1069.646 | 11.07572 | 1057.671 | 11.10423 | 1047.142 |

|          |          |          |          |          |          |          |          |          |
|----------|----------|----------|----------|----------|----------|----------|----------|----------|
| 1097.235 | 11.04958 | 1082.804 | 11.06    | 1070.02  | 11.077   | 1057.933 | 11.10593 | 1047.491 |
| 1097.569 | 11.05099 | 1083.127 | 11.06143 | 1070.33  | 11.07923 | 1058.395 | 11.10763 | 1047.842 |
| 1097.91  | 11.05226 | 1083.42  | 11.06293 | 1070.656 | 11.08032 | 1058.622 | 11.10934 | 1048.196 |
| 1098.21  | 11.05362 | 1083.734 | 11.06433 | 1070.961 | 11.08233 | 1059.044 | 11.11195 | 1048.741 |
| 1098.511 | 11.05549 | 1084.168 | 11.06555 | 1071.228 | 11.08395 | 1059.388 | 11.11384 | 1049.141 |
| 1098.778 | 11.05668 | 1084.446 | 11.06677 | 1071.497 | 11.0862  | 1059.867 | 11.11573 | 1049.545 |
| 1098.927 | 11.05876 | 1084.934 | 11.0689  | 1071.97  | 11.08834 | 1060.326 | 11.12    | 1050.469 |
| 1098.987 | 11.06    | 1085.228 | 11.07    | 1072.215 | 11.09    | 1060.686 | 11.12216 | 1050.939 |
| 1098.992 | 11.0615  | 1085.585 | 11.07221 | 1072.711 | 11.09244 | 1061.216 | 11.12803 | 1052.249 |
| 1099.014 | 11.06285 | 1085.906 | 11.07359 | 1073.023 | 11.09458 | 1061.686 | 11.12997 | 1052.685 |
| 1099.069 | 11.06419 | 1086.229 | 11.07843 | 1074.136 | 11.09633 | 1062.073 | 11.13138 | 1052.862 |
| 1099.19  | 11.06654 | 1086.798 | 11.08    | 1074.5   | 11.09807 | 1062.462 | 11.1336  | 1052.878 |
| 1099.301 | 11.06889 | 1087.371 | 11.08147 | 1074.842 | 11.09982 | 1062.853 | 11.13493 | 1052.872 |
| 1099.396 | 11.07    | 1087.642 | 11.08283 | 1075.16  | 11.102   | 1063.343 | 11.13918 | 1053.019 |
| 1099.592 | 11.07176 | 1088.074 | 11.08522 | 1075.722 | 11.10384 | 1063.763 | 11.14061 | 1053.079 |
| 1099.685 | 11.07339 | 1088.382 | 11.08722 | 1076.198 | 11.10569 | 1064.185 | 11.14485 | 1053.257 |
| 1099.777 | 11.07467 | 1088.375 | 11.08923 | 1076.676 | 11.10942 | 1065.052 | 11.15    | 1053.459 |
| 1099.872 | 11.07739 | 1088.334 | 11.09066 | 1076.93  | 11.11061 | 1065.261 | 11.15485 | 1053.649 |
| 1100.005 | 11.07899 | 1088.402 | 11.09229 | 1076.931 | 11.11225 | 1065.277 | 11.16    | 1053.871 |
| 1100.137 | 11.08    | 1088.463 | 11.09404 | 1076.91  | 11.11511 | 1065.283 | 11.16485 | 1054.082 |
| 1100.321 | 11.08182 | 1088.583 | 11.09579 | 1076.961 | 11.11797 | 1065.39  | 11.17    | 1054.313 |
| 1100.585 | 11.08347 | 1088.682 | 11.09754 | 1077.052 | 11.12    | 1065.486 | 11.17485 | 1054.533 |
| 1100.774 | 11.08512 | 1088.765 | 11.09929 | 1077.15  | 11.12327 | 1065.64  | 11.18    | 1054.777 |
| 1101.082 | 11.08756 | 1088.885 | 11.102   | 1077.292 | 11.13    | 1065.937 | 11.18485 | 1055.01  |
| 1101.399 | 11.08999 | 1089.012 | 11.10641 | 1077.496 | 11.13327 | 1066.081 | 11.19    | 1055.266 |
| 1101.717 | 11.09279 | 1089.161 | 11.11    | 1077.671 | 11.14    | 1066.399 | 11.19485 | 1055.51  |
| 1102.045 | 11.09763 | 1089.429 | 11.11504 | 1077.921 | 11.14327 | 1066.555 | 11.2     | 1055.779 |
| 1102.373 | 11.1     | 1089.56  | 11.12    | 1078.177 | 11.15    | 1066.888 | 11.20485 | 1056.036 |
| 1102.712 | 11.10554 | 1089.869 | 11.12504 | 1078.438 | 11.15327 | 1067.051 | 11.21    | 1056.317 |
| 1103.051 | 11.11    | 1090.126 | 11.13    | 1078.704 | 11.16    | 1067.4   | 11.21485 | 1056.585 |
| 1103.4   | 11.11554 | 1090.448 | 11.13504 | 1078.977 | 11.16327 | 1067.57  | 11.22    | 1056.88  |
| 1103.75  | 11.12    | 1090.715 | 11.14    | 1079.255 | 11.17    | 1067.935 | 11.22485 | 1057.16  |
| 1104.111 | 11.12554 | 1091.048 | 11.14504 | 1079.539 | 11.17327 | 1068.113 | 11.23    | 1057.468 |
| 1104.472 | 11.13    | 1091.325 | 11.15    | 1079.828 | 11.18    | 1068.493 | 11.23485 | 1057.76  |
| 1104.843 | 11.13554 | 1091.671 | 11.15504 | 1080.123 | 11.18327 | 1068.68  | 11.24    | 1058.081 |
| 1105.215 | 11.14    | 1091.957 | 11.16    | 1080.423 | 11.19    | 1069.076 | 11.24485 | 1058.385 |
| 1105.597 | 11.14554 | 1092.315 | 11.16504 | 1080.731 | 11.19327 | 1069.27  | 11.24876 | 1058.637 |
| 1105.98  | 11.15    | 1092.611 | 11.17    | 1081.042 | 11.2     | 1069.683 | 11.24977 | 1058.702 |
| 1106.374 | 11.15554 | 1092.982 | 11.17504 | 1081.361 | 11.20327 | 1069.885 | 11.25108 | 1058.787 |
| 1106.768 | 11.16    | 1093.289 | 11.18    | 1081.684 | 11.21    | 1070.314 | 11.25449 | 1059.012 |
| 1107.173 | 11.16554 | 1093.672 | 11.18504 | 1082.015 | 11.21327 | 1070.524 | 11.26    | 1059.383 |
| 1107.579 | 11.17    | 1093.988 | 11.19    | 1082.35  | 11.22    | 1070.969 | 11.2639  | 1059.647 |
| 1107.995 | 11.17554 | 1094.384 | 11.19504 | 1082.693 | 11.22327 | 1071.187 | 11.26854 | 1059.969 |
| 1108.412 | 11.18    | 1094.711 | 11.2     | 1083.039 | 11.23    | 1071.649 | 11.27    | 1060.071 |
| 1108.84  | 11.18554 | 1095.12  | 11.20504 | 1083.394 | 11.23327 | 1071.875 | 11.27531 | 1060.448 |
| 1109.268 | 11.19    | 1095.456 | 11.21    | 1083.752 | 11.24    | 1072.354 | 11.28    | 1060.786 |
| 1109.707 | 11.19554 | 1095.878 | 11.21504 | 1084.119 | 11.24327 | 1072.588 | 11.28522 | 1061.167 |



|          |          |          |          |          |          |          |          |          |
|----------|----------|----------|----------|----------|----------|----------|----------|----------|
| 1110.147 | 11.2     | 1096.225 | 11.22    | 1084.489 | 11.24874 | 1072.989 | 11.29    | 1061.524 |
| 1110.598 | 11.20554 | 1096.66  | 11.22504 | 1084.868 | 11.24976 | 1073.064 | 11.29522 | 1061.918 |
| 1111.05  | 11.21    | 1097.017 | 11.23    | 1085.251 | 11.2511  | 1073.163 | 11.3     | 1062.288 |
| 1111.512 | 11.21554 | 1097.465 | 11.23504 | 1085.641 | 11.2549  | 1073.448 | 11.30522 | 1062.695 |
| 1111.975 | 11.22    | 1097.833 | 11.24    | 1086.036 | 11.26    | 1073.836 | 11.31    | 1063.077 |
| 1112.45  | 11.22554 | 1098.294 | 11.24504 | 1086.439 | 11.26434 | 1074.168 | 11.31522 | 1063.497 |
| 1112.925 | 11.23    | 1098.673 | 11.24874 | 1086.742 | 11.26855 | 1074.497 | 11.32    | 1063.892 |
| 1113.286 | 11.23554 | 1099.147 | 11.24984 | 1086.831 | 11.27    | 1074.611 | 11.32522 | 1064.326 |
| 1113.387 | 11.24    | 1099.536 | 11.25122 | 1086.945 | 11.27444 | 1074.964 | 11.33    | 1064.733 |
| 1113.543 | 11.24554 | 1100.023 | 11.25615 | 1087.356 | 11.28    | 1075.415 | 11.33522 | 1065.18  |
| 1114.045 | 11.24874 | 1100.31  | 11.26    | 1087.681 | 11.28436 | 1075.77  | 11.34    | 1065.599 |
| 1114.397 | 11.24987 | 1100.411 | 11.26563 | 1088.16  | 11.29    | 1076.241 | 11.34522 | 1066.061 |
| 1114.978 | 11.25134 | 1100.543 | 11.26854 | 1088.411 | 11.29436 | 1076.608 | 11.35    | 1066.493 |
| 1115.255 | 11.2573  | 1101.088 | 11.27    | 1088.538 | 11.3     | 1077.093 | 11.35522 | 1066.967 |
| 1115.403 | 11.26    | 1101.337 | 11.27264 | 1088.768 | 11.30436 | 1077.47  | 11.36    | 1067.412 |
| 1115.638 | 11.26681 | 1101.969 | 11.28    | 1089.425 | 11.31    | 1077.97  | 11.36522 | 1067.901 |
| 1116.44  | 11.26854 | 1102.133 | 11.28259 | 1089.657 | 11.31436 | 1078.358 | 11.37    | 1068.358 |
| 1116.676 | 11.26992 | 1102.262 | 11.29    | 1090.336 | 11.32    | 1078.872 | 11.37522 | 1068.861 |
| 1117.5   | 11.27134 | 1102.398 | 11.29259 | 1090.575 | 11.32436 | 1079.272 | 11.38    | 1069.331 |
| 1117.741 | 11.27958 | 1103.195 | 11.3     | 1091.272 | 11.33    | 1079.8   | 11.38522 | 1069.848 |
| 1118.584 | 11.28118 | 1103.35  | 11.30259 | 1091.517 | 11.33436 | 1080.211 | 11.39    | 1070.331 |
| 1118.831 | 11.28941 | 1104.157 | 11.31    | 1092.233 | 11.34    | 1080.754 | 11.39522 | 1070.861 |
| 1119.692 | 11.29118 | 1104.332 | 11.31259 | 1092.485 | 11.34436 | 1081.176 | 11.4     | 1071.357 |
| 1119.944 | 11.29941 | 1105.159 | 11.32    | 1093.219 | 11.35    | 1081.733 | 11.40522 | 1071.902 |
| 1120.825 | 11.30118 | 1105.339 | 11.32259 | 1093.477 | 11.35436 | 1082.166 | 11.41    | 1072.411 |
| 1121.082 | 11.30941 | 1106.186 | 11.33    | 1094.23  | 11.36    | 1082.738 | 11.41522 | 1072.97  |
| 1121.982 | 11.31118 | 1106.37  | 11.33259 | 1094.495 | 11.36436 | 1083.183 | 11.42    | 1073.492 |
| 1122.245 | 11.31941 | 1107.237 | 11.34    | 1095.267 | 11.37    | 1083.77  | 11.42522 | 1074.066 |
| 1123.163 | 11.32118 | 1107.426 | 11.34259 | 1095.538 | 11.37436 | 1084.226 | 11.43    | 1074.601 |
| 1123.432 | 11.32941 | 1108.313 | 11.35    | 1096.329 | 11.38    | 1084.828 | 11.43522 | 1075.189 |
| 1124.369 | 11.33118 | 1108.506 | 11.35259 | 1096.606 | 11.38436 | 1085.296 | 11.44    | 1075.737 |
| 1124.644 | 11.33941 | 1109.414 | 11.36    | 1097.416 | 11.39    | 1085.913 | 11.44522 | 1076.339 |
| 1125.601 | 11.34118 | 1109.612 | 11.36259 | 1097.701 | 11.39436 | 1086.392 | 11.45    | 1076.901 |
| 1125.881 | 11.34941 | 1110.54  | 11.37    | 1098.53  | 11.4     | 1087.024 | 11.45522 | 1077.518 |
| 1126.857 | 11.35118 | 1110.742 | 11.37259 | 1098.821 | 11.40436 | 1087.515 | 11.46    | 1078.093 |
| 1127.143 | 11.35941 | 1111.691 | 11.38    | 1099.67  | 11.41    | 1088.162 | 11.46522 | 1078.724 |
| 1128.139 | 11.36118 | 1111.898 | 11.38259 | 1099.967 | 11.41436 | 1088.664 | 11.47    | 1079.313 |
| 1128.43  | 11.36941 | 1112.868 | 11.39    | 1100.835 | 11.42    | 1089.326 | 11.47522 | 1079.959 |
| 1129.445 | 11.37118 | 1113.079 | 11.39259 | 1101.14  | 11.42436 | 1089.841 | 11.48    | 1080.561 |
| 1129.743 | 11.37941 | 1114.07  | 11.4     | 1102.027 | 11.43    | 1090.518 | 11.48522 | 1081.221 |
| 1130.778 | 11.38118 | 1114.285 | 11.40259 | 1102.339 | 11.43436 | 1091.044 | 11.49    | 1081.837 |
| 1131.081 | 11.38941 | 1115.298 | 11.41    | 1103.246 | 11.44    | 1091.737 | 11.49522 | 1082.513 |
| 1132.136 | 11.39118 | 1115.518 | 11.41259 | 1103.564 | 11.44436 | 1092.275 | 11.5     | 1083.142 |
| 1132.445 | 11.39941 | 1116.551 | 11.42    | 1104.491 | 11.45    | 1092.984 | 11.50522 | 1083.832 |
| 1133.52  | 11.40118 | 1116.776 | 11.42259 | 1104.816 | 11.45436 | 1093.534 | 11.51    | 1084.475 |
| 1133.835 | 11.40941 | 1117.83  | 11.43    | 1105.762 | 11.46    | 1094.258 | 11.51522 | 1085.18  |
| 1134.93  | 11.41118 | 1118.06  | 11.43259 | 1106.094 | 11.46436 | 1094.82  | 11.52    | 1085.837 |

|          |          |          |          |          |          |          |          |          |
|----------|----------|----------|----------|----------|----------|----------|----------|----------|
| 1135.251 | 11.41941 | 1119.137 | 11.44    | 1107.061 | 11.47    | 1095.559 | 11.52522 | 1086.557 |
| 1136.367 | 11.42118 | 1119.37  | 11.44259 | 1107.4   | 11.47436 | 1096.134 | 11.53    | 1087.228 |
| 1136.693 | 11.42941 | 1120.467 | 11.45    | 1108.386 | 11.48    | 1096.889 | 11.53104 | 1087.374 |
| 1137.829 | 11.43118 | 1120.706 | 11.45259 | 1108.733 | 11.48436 | 1097.475 | 11.53421 | 1087.822 |
| 1138.162 | 11.43941 | 1121.828 | 11.46    | 1109.739 | 11.49    | 1098.246 | 11.54    | 1088.651 |
| 1139.318 | 11.44118 | 1122.07  | 11.46259 | 1110.093 | 11.49436 | 1098.845 | 11.54312 | 1089.098 |
| 1139.657 | 11.44941 | 1123.209 | 11.47    | 1111.119 | 11.5     | 1099.632 | 11.55    | 1090.102 |
| 1140.834 | 11.45118 | 1123.457 | 11.47259 | 1111.48  | 11.50436 | 1100.242 | 11.55312 | 1090.558 |
| 1141.178 | 11.45859 | 1124.515 | 11.48    | 1112.527 | 11.51    | 1101.045 | 11.56    | 1091.581 |
| 1142.376 | 11.46    | 1124.717 | 11.48259 | 1112.894 | 11.51436 | 1101.668 | 11.56312 | 1092.045 |
| 1142.727 | 11.46106 | 1124.868 | 11.49    | 1113.962 | 11.52    | 1102.487 | 11.57    | 1093.087 |
| 1143.945 | 11.46847 | 1125.935 | 11.49259 | 1114.337 | 11.52436 | 1103.123 | 11.57312 | 1093.56  |
| 1144.302 | 11.47    | 1126.157 | 11.5     | 1115.425 | 11.53    | 1103.958 | 11.58    | 1094.619 |
| 1144.647 | 11.47106 | 1126.311 | 11.50259 | 1115.807 | 11.53103 | 1104.11  | 11.58312 | 1095.1   |
| 1145.036 | 11.47847 | 1127.398 | 11.51    | 1116.916 | 11.53497 | 1104.699 | 11.59    | 1096.178 |
| 1145.23  | 11.48    | 1127.625 | 11.51259 | 1117.305 | 11.54    | 1105.457 | 11.59312 | 1096.666 |
| 1145.468 | 11.48106 | 1127.782 | 11.52    | 1118.434 | 11.54387 | 1106.044 | 11.6     | 1097.761 |
| 1145.661 | 11.48847 | 1128.889 | 11.52259 | 1118.831 | 11.55    | 1106.985 | 11.60312 | 1098.257 |
| 1145.808 | 11.49    | 1129.12  | 11.53    | 1119.981 | 11.55387 | 1107.582 | 11.61    | 1099.369 |
| 1145.918 | 11.49106 | 1129.28  | 11.53104 | 1120.142 | 11.56    | 1108.54  | 11.61312 | 1099.873 |
| 1146.02  | 11.49847 | 1130.407 | 11.53683 | 1121.051 | 11.56387 | 1109.147 | 11.62    | 1101     |
| 1146.115 | 11.5     | 1130.642 | 11.54    | 1121.553 | 11.57    | 1110.121 | 11.62312 | 1101.512 |
| 1146.294 | 11.50106 | 1130.805 | 11.54569 | 1122.456 | 11.57387 | 1110.738 | 11.63    | 1102.655 |
| 1146.43  | 11.50847 | 1131.953 | 11.55    | 1123.15  | 11.58    | 1111.728 | 11.63312 | 1103.174 |
| 1146.574 | 11.51    | 1132.191 | 11.55569 | 1124.069 | 11.58387 | 1112.356 | 11.64    | 1104.333 |
| 1146.674 | 11.51106 | 1132.357 | 11.56    | 1124.773 | 11.59    | 1113.361 | 11.64312 | 1104.858 |
| 1146.767 | 11.51847 | 1133.525 | 11.56569 | 1125.707 | 11.59387 | 1113.998 | 11.65    | 1106.032 |
| 1146.863 | 11.52    | 1133.769 | 11.57    | 1126.423 | 11.6     | 1115.018 | 11.65312 | 1106.565 |
| 1146.959 | 11.52106 | 1133.938 | 11.57569 | 1127.372 | 11.60387 | 1115.665 | 11.66    | 1107.754 |
| 1147.045 | 11.52847 | 1135.126 | 11.58    | 1128.099 | 11.61    | 1116.7   | 11.66312 | 1108.293 |
| 1147.153 | 11.53    | 1135.373 | 11.58569 | 1129.062 | 11.61387 | 1117.356 | 11.67    | 1109.496 |
| 1147.243 | 11.53102 | 1135.539 | 11.59    | 1129.8   | 11.62    | 1118.405 | 11.67312 | 1110.041 |
| 1147.314 | 11.53239 | 1135.762 | 11.59569 | 1130.777 | 11.62387 | 1119.07  | 11.68    | 1111.258 |
| 1147.382 | 11.54    | 1137.016 | 11.6     | 1131.526 | 11.63    | 1120.134 | 11.68312 | 1111.81  |
| 1147.446 | 11.54134 | 1137.238 | 11.60569 | 1132.517 | 11.63387 | 1120.808 | 11.69    | 1113.04  |
| 1147.567 | 11.54958 | 1138.616 | 11.61    | 1133.275 | 11.64    | 1121.884 | 11.69312 | 1113.597 |
| 1147.608 | 11.55118 | 1138.883 | 11.61569 | 1134.28  | 11.64387 | 1122.567 | 11.7     | 1114.841 |
| 1147.753 | 11.55941 | 1140.272 | 11.62    | 1135.048 | 11.65    | 1123.657 | 11.70312 | 1115.404 |
| 1147.817 | 11.56118 | 1140.572 | 11.62569 | 1136.065 | 11.65387 | 1124.347 | 11.71    | 1116.66  |
| 1147.899 | 11.56941 | 1141.982 | 11.63    | 1136.844 | 11.66    | 1125.451 | 11.71312 | 1117.229 |
| 1147.928 | 11.57118 | 1142.287 | 11.63569 | 1137.874 | 11.66387 | 1126.149 | 11.71746 | 1118.026 |
| 1147.949 | 11.57941 | 1143.718 | 11.64    | 1138.661 | 11.67    | 1127.265 | 11.71954 | 1118.409 |
| 1147.981 | 11.58118 | 1144.028 | 11.64569 | 1139.704 | 11.67387 | 1127.971 | 11.72181 | 1118.828 |
| 1148.006 | 11.58364 | 1144.447 | 11.65    | 1140.501 | 11.68    | 1129.099 | 11.73    | 1120.35  |
| 1148.024 | 11.58539 | 1144.724 | 11.65569 | 1141.555 | 11.68387 | 1129.813 | 11.73181 | 1120.687 |
| 1148.037 | 11.58714 | 1144.978 | 11.66    | 1142.361 | 11.69    | 1130.952 | 11.74    | 1122.222 |
| 1148.054 | 11.58861 | 1145.173 | 11.66569 | 1143.427 | 11.69387 | 1131.673 | 11.74181 | 1122.562 |

|          |          |          |          |          |          |          |          |          |
|----------|----------|----------|----------|----------|----------|----------|----------|----------|
| 1148.069 | 11.58992 | 1145.335 | 11.66675 | 1143.627 | 11.7     | 1132.824 | 11.75    | 1124.11  |
| 1148.074 | 11.59137 | 1145.501 | 11.66797 | 1143.855 | 11.70387 | 1133.552 | 11.75181 | 1124.453 |
| 1148.081 | 11.59325 | 1145.693 | 11.67    | 1144.213 | 11.71    | 1134.714 | 11.76    | 1126.014 |
| 1148.08  | 11.59625 | 1145.962 | 11.67122 | 1144.423 | 11.71274 | 1135.235 | 11.76181 | 1126.359 |
| 1148.078 | 11.59831 | 1146.126 | 11.67313 | 1144.72  | 11.72    | 1136.623 | 11.77    | 1127.931 |
| 1148.077 | 11.6     | 1146.25  | 11.67742 | 1145.281 | 11.72243 | 1137.088 | 11.77181 | 1128.279 |
| 1148.076 | 11.60236 | 1146.414 | 11.68    | 1145.552 | 11.73    | 1138.549 | 11.78    | 1129.863 |
| 1148.073 | 11.60374 | 1146.508 | 11.68182 | 1145.712 | 11.73243 | 1139.017 | 11.78181 | 1130.213 |
| 1148.068 | 11.60498 | 1146.591 | 11.68418 | 1145.895 | 11.74    | 1140.49  | 11.79    | 1131.808 |
| 1148.063 | 11.60626 | 1146.678 | 11.68568 | 1146.005 | 11.74243 | 1140.963 | 11.79181 | 1132.16  |
| 1148.056 | 11.60755 | 1146.763 | 11.6883  | 1146.195 | 11.75    | 1142.448 | 11.8     | 1133.766 |
| 1148.051 | 11.60884 | 1146.847 | 11.69    | 1146.317 | 11.75227 | 1142.893 | 11.80181 | 1134.12  |
| 1148.046 | 11.61    | 1146.922 | 11.69172 | 1146.44  | 11.75452 | 1143.331 | 11.81    | 1135.735 |
| 1148.042 | 11.61147 | 1147.015 | 11.69321 | 1146.545 | 11.75718 | 1143.783 | 11.81181 | 1136.092 |
| 1148.038 | 11.61265 | 1147.085 | 11.69455 | 1146.638 | 11.75984 | 1144.169 | 11.82    | 1137.717 |
| 1148.034 | 11.61383 | 1147.151 | 11.6959  | 1146.729 | 11.76133 | 1144.373 | 11.82181 | 1138.076 |
| 1148.03  | 11.61578 | 1147.249 | 11.69724 | 1146.815 | 11.76258 | 1144.528 | 11.83    | 1139.709 |
| 1148.026 | 11.61773 | 1147.333 | 11.6996  | 1146.959 | 11.76418 | 1144.708 | 11.83181 | 1140.07  |
| 1148.021 | 11.61969 | 1147.406 | 11.70245 | 1147.106 | 11.7657  | 1144.864 | 11.83401 | 1140.51  |
| 1148.019 | 11.62223 | 1147.491 | 11.70427 | 1147.185 | 11.76725 | 1145.014 | 11.83652 | 1141.005 |
| 1148.015 | 11.62612 | 1147.574 | 11.71    | 1147.349 | 11.7688  | 1145.156 | 11.84    | 1141.561 |
| 1148.012 | 11.63    | 1147.638 | 11.71207 | 1147.405 | 11.77    | 1145.262 | 11.84251 | 1141.936 |
| 1148.009 | 11.63445 | 1147.706 | 11.71478 | 1147.458 | 11.77161 | 1145.403 | 11.84661 | 1142.374 |
| 1148.006 | 11.63834 | 1147.756 | 11.71758 | 1147.505 | 11.77301 | 1145.526 | 11.84954 | 1142.664 |
| 1148.003 | 11.64    | 1147.775 | 11.72    | 1147.542 | 11.77422 | 1145.636 | 11.85335 | 1143.036 |
| 1148.001 | 11.64135 | 1147.79  | 11.72321 | 1147.588 | 11.77549 | 1145.75  | 11.85477 | 1143.179 |
| 1147.998 | 11.64275 | 1147.805 | 11.72602 | 1147.623 | 11.77675 | 1145.866 | 11.85599 | 1143.307 |
| 1147.996 | 11.64519 | 1147.829 | 11.72836 | 1147.649 | 11.77801 | 1145.98  | 11.8581  | 1143.547 |
| 1147.993 | 11.64763 | 1147.848 | 11.73    | 1147.667 | 11.77959 | 1146.123 | 11.85945 | 1143.713 |
| 1147.992 | 11.65    | 1147.864 | 11.73268 | 1147.693 | 11.78164 | 1146.302 | 11.86154 | 1143.99  |
| 1147.989 | 11.65279 | 1147.88  | 11.73672 | 1147.721 | 11.78278 | 1146.396 | 11.86294 | 1144.193 |
| 1147.987 | 11.65941 | 1147.893 | 11.73969 | 1147.736 | 11.78391 | 1146.485 | 11.86434 | 1144.399 |
| 1147.985 | 11.66095 | 1147.895 | 11.7434  | 1147.752 | 11.78599 | 1146.63  | 11.86573 | 1144.606 |
| 1147.984 | 11.66756 | 1147.902 | 11.75    | 1147.763 | 11.78787 | 1146.746 | 11.86803 | 1144.939 |
| 1147.982 | 11.67    | 1147.902 | 11.7534  | 1147.769 | 11.79    | 1146.857 | 11.87    | 1145.21  |
| 1147.981 | 11.67756 | 1147.904 | 11.76    | 1147.775 | 11.79215 | 1146.961 | 11.8724  | 1145.498 |
| 1147.979 | 11.68    | 1147.905 | 11.7634  | 1147.777 | 11.79781 | 1147.132 | 11.87447 | 1145.711 |
| 1147.978 | 11.6869  | 1147.906 | 11.77    | 1147.78  | 11.8     | 1147.19  | 11.87633 | 1145.877 |
| 1147.977 | 11.69    | 1147.905 | 11.7734  | 1147.782 | 11.80647 | 1147.345 | 11.87801 | 1146.009 |
| 1147.976 | 11.69681 | 1147.902 | 11.78    | 1147.782 | 11.81    | 1147.417 | 11.87952 | 1146.115 |
| 1147.974 | 11.7     | 1147.899 | 11.7834  | 1147.782 | 11.81163 | 1147.445 | 11.88172 | 1146.259 |
| 1147.974 | 11.70681 | 1147.894 | 11.79    | 1147.782 | 11.81306 | 1147.47  | 11.88323 | 1146.342 |
| 1147.972 | 11.71    | 1147.893 | 11.7934  | 1147.781 | 11.81449 | 1147.494 | 11.88474 | 1146.42  |
| 1147.972 | 11.71681 | 1147.89  | 11.8     | 1147.781 | 11.817   | 1147.531 | 11.88781 | 1146.569 |
| 1147.971 | 11.72    | 1147.89  | 11.8034  | 1147.781 | 11.81926 | 1147.56  | 11.89    | 1146.673 |
| 1147.97  | 11.72681 | 1147.888 | 11.81    | 1147.781 | 11.82032 | 1147.573 | 11.89101 | 1146.721 |
| 1147.97  | 11.73    | 1147.887 | 11.8134  | 1147.781 | 11.82258 | 1147.598 | 11.89202 | 1146.767 |

|          |          |          |          |          |          |          |          |          |
|----------|----------|----------|----------|----------|----------|----------|----------|----------|
| 1147.969 | 11.73681 | 1147.884 | 11.82    | 1147.782 | 11.82753 | 1147.626 | 11.89377 | 1146.847 |
| 1147.969 | 11.74    | 1147.883 | 11.8234  | 1147.782 | 11.83    | 1147.636 | 11.89535 | 1146.917 |
| 1147.969 | 11.74681 | 1147.881 | 11.83    | 1147.783 | 11.83566 | 1147.654 | 11.89693 | 1146.983 |
| 1147.968 | 11.75    | 1147.88  | 11.8334  | 1147.783 | 11.84    | 1147.661 | 11.89851 | 1147.046 |
| 1147.968 | 11.75681 | 1147.88  | 11.84    | 1147.784 | 11.84566 | 1147.671 | 11.9     | 1147.102 |
| 1147.968 | 11.76    | 1147.879 | 11.8434  | 1147.784 | 11.85    | 1147.679 | 11.90181 | 1147.167 |
| 1147.968 | 11.76681 | 1147.879 | 11.85    | 1147.786 | 11.85566 | 1147.688 | 11.90467 | 1147.246 |
| 1147.968 | 11.77    | 1147.878 | 11.8534  | 1147.786 | 11.86    | 1147.691 | 11.90687 | 1147.296 |
| 1147.968 | 11.77681 | 1147.877 | 11.86    | 1147.788 | 11.86566 | 1147.694 | 11.91    | 1147.351 |
| 1147.968 | 11.78    | 1147.877 | 11.8634  | 1147.788 | 11.87    | 1147.693 | 11.91251 | 1147.392 |
| 1147.968 | 11.78681 | 1147.876 | 11.87    | 1147.79  | 11.87566 | 1147.693 | 11.91568 | 1147.428 |
| 1147.968 | 11.79    | 1147.876 | 11.8734  | 1147.791 | 11.88    | 1147.694 | 11.91885 | 1147.459 |
| 1147.969 | 11.79681 | 1147.877 | 11.88    | 1147.792 | 11.88566 | 1147.695 | 11.92    | 1147.47  |
| 1147.969 | 11.8     | 1147.876 | 11.8834  | 1147.793 | 11.89    | 1147.697 | 11.92362 | 1147.502 |
| 1147.969 | 11.80681 | 1147.876 | 11.89    | 1147.795 | 11.89566 | 1147.7   | 11.92679 | 1147.526 |
| 1147.97  | 11.81    | 1147.876 | 11.8934  | 1147.796 | 11.9     | 1147.701 | 11.9296  | 1147.545 |
| 1147.97  | 11.81681 | 1147.876 | 11.9     | 1147.798 | 11.90566 | 1147.702 | 11.93321 | 1147.568 |
| 1147.971 | 11.82    | 1147.877 | 11.9034  | 1147.799 | 11.91    | 1147.703 | 11.93825 | 1147.588 |
| 1147.971 | 11.82681 | 1147.877 | 11.91    | 1147.801 | 11.91566 | 1147.704 | 11.94    | 1147.593 |
| 1147.972 | 11.83    | 1147.878 | 11.9134  | 1147.802 | 11.92    | 1147.706 | 11.94577 | 1147.609 |
| 1147.973 | 11.83681 | 1147.878 | 11.92    | 1147.804 | 11.92566 | 1147.709 | 11.95    | 1147.613 |
| 1147.974 | 11.84    | 1147.878 | 11.9234  | 1147.806 | 11.93    | 1147.711 | 11.95577 | 1147.619 |
| 1147.974 | 11.84681 | 1147.879 | 11.92913 | 1147.808 | 11.93566 | 1147.713 | 11.96    | 1147.623 |
| 1147.975 | 11.85    | 1147.879 | 11.93082 | 1147.808 | 11.94    | 1147.715 | 11.96577 | 1147.628 |
| 1147.976 | 11.85681 | 1147.88  | 11.93655 | 1147.81  | 11.94566 | 1147.717 | 11.97    | 1147.632 |
| 1147.977 | 11.86    | 1147.881 | 11.94    | 1147.811 | 11.95    | 1147.719 | 11.97577 | 1147.635 |
| 1147.978 | 11.86681 | 1147.882 | 11.94655 | 1147.814 | 11.95566 | 1147.722 | 11.98    | 1147.637 |
| 1147.979 | 11.87    | 1147.882 | 11.95    | 1147.815 | 11.96    | 1147.724 | 11.98577 | 1147.639 |
| 1147.98  | 11.87681 | 1147.884 | 11.95655 | 1147.817 | 11.96566 | 1147.726 | 11.99    | 1147.641 |
| 1147.981 | 11.88    | 1147.884 | 11.96    | 1147.819 | 11.97    | 1147.728 | 11.99577 | 1147.643 |
| 1147.982 | 11.88681 | 1147.885 | 11.96655 | 1147.821 | 11.97566 | 1147.731 | 12       | 1147.646 |
| 1147.983 | 11.89    | 1147.886 | 11.97    | 1147.823 | 11.98    | 1147.733 | 12.00577 | 1147.649 |
| 1147.984 | 11.89681 | 1147.888 | 11.97655 | 1147.825 | 11.98566 | 1147.736 | 12.01    | 1147.651 |
| 1147.985 | 11.9     | 1147.888 | 11.98    | 1147.827 | 11.99    | 1147.738 | 12.01577 | 1147.654 |
| 1147.986 | 11.90681 | 1147.89  | 11.98655 | 1147.829 | 11.99566 | 1147.741 | 12.02    | 1147.657 |
| 1147.988 | 11.91    | 1147.891 | 11.99    | 1147.831 | 12       | 1147.743 | 12.02577 | 1147.66  |
| 1147.989 | 11.91681 | 1147.892 | 11.99655 | 1147.834 | 12.00566 | 1147.746 | 12.03    | 1147.662 |
| 1147.99  | 11.92    | 1147.893 | 12       | 1147.835 | 12.01    | 1147.749 | 12.03577 | 1147.666 |
| 1147.991 | 11.92681 | 1147.895 | 12.00655 | 1147.838 | 12.01566 | 1147.751 | 12.04    | 1147.668 |
| 1147.993 | 11.93    | 1147.896 | 12.01    | 1147.839 | 12.02    | 1147.754 | 12.04577 | 1147.672 |
| 1147.994 | 11.93681 | 1147.898 | 12.01655 | 1147.842 | 12.02566 | 1147.757 | 12.05    | 1147.675 |
| 1147.995 | 11.94    | 1147.899 | 12.02    | 1147.844 | 12.03    | 1147.759 | 12.05577 | 1147.678 |
| 1147.997 | 11.94681 | 1147.901 | 12.02655 | 1147.847 | 12.03566 | 1147.762 | 12.06    | 1147.681 |
| 1147.998 | 11.95    | 1147.901 | 12.03    | 1147.848 | 12.04    | 1147.765 | 12.06577 | 1147.684 |
| 1148     | 11.95681 | 1147.903 | 12.03655 | 1147.851 | 12.04566 | 1147.768 | 12.07    | 1147.687 |
| 1148.001 | 11.96    | 1147.904 | 12.04    | 1147.853 | 12.05    | 1147.77  | 12.07577 | 1147.691 |
| 1148.002 | 11.96681 | 1147.907 | 12.04655 | 1147.856 | 12.05566 | 1147.773 | 12.08    | 1147.694 |

|          |          |          |          |          |          |          |          |          |
|----------|----------|----------|----------|----------|----------|----------|----------|----------|
| 1148.004 | 11.97    | 1147.908 | 12.05    | 1147.858 | 12.06    | 1147.776 | 12.08577 | 1147.698 |
| 1148.005 | 11.97681 | 1147.91  | 12.05655 | 1147.861 | 12.06566 | 1147.779 | 12.09    | 1147.7   |
| 1148.007 | 11.98    | 1147.911 | 12.06    | 1147.862 | 12.07    | 1147.781 | 12.09577 | 1147.704 |
| 1148.009 | 11.98681 | 1147.913 | 12.06655 | 1147.865 | 12.07566 | 1147.784 | 12.1     | 1147.707 |
| 1148.01  | 11.99    | 1147.914 | 12.07    | 1147.867 | 12.08    | 1147.787 | 12.10577 | 1147.711 |
| 1148.012 | 11.99681 | 1147.917 | 12.07655 | 1147.87  | 12.08566 | 1147.79  | 12.11    | 1147.713 |
| 1148.014 | 12       | 1147.918 | 12.08    | 1147.872 | 12.09    | 1147.792 | 12.11577 | 1147.717 |
| 1148.015 | 12.00681 | 1147.92  | 12.08655 | 1147.875 | 12.09566 | 1147.796 | 12.12    | 1147.72  |
| 1148.017 | 12.01    | 1147.921 | 12.09    | 1147.877 | 12.1     | 1147.798 | 12.12577 | 1147.724 |
| 1148.018 | 12.01681 | 1147.924 | 12.09655 | 1147.88  | 12.10566 | 1147.801 | 12.13    | 1147.727 |
| 1148.02  | 12.02    | 1147.925 | 12.1     | 1147.882 | 12.11    | 1147.804 | 12.13577 | 1147.731 |
| 1148.022 | 12.02681 | 1147.928 | 12.10655 | 1147.885 | 12.11566 | 1147.807 | 12.14    | 1147.733 |
| 1148.024 | 12.03    | 1147.929 | 12.11    | 1147.887 | 12.12    | 1147.81  | 12.14577 | 1147.737 |
| 1148.025 | 12.03681 | 1147.931 | 12.11655 | 1147.89  | 12.12566 | 1147.813 | 12.15    | 1147.74  |
| 1148.027 | 12.04    | 1147.933 | 12.12    | 1147.892 | 12.13    | 1147.816 | 12.15577 | 1147.744 |
| 1148.029 | 12.04681 | 1147.935 | 12.12655 | 1147.895 | 12.13566 | 1147.819 | 12.16    | 1147.747 |
| 1148.031 | 12.05    | 1147.936 | 12.13    | 1147.897 | 12.14    | 1147.821 | 12.16577 | 1147.751 |
| 1148.032 | 12.05681 | 1147.939 | 12.13655 | 1147.9   | 12.14566 | 1147.825 | 12.17    | 1147.754 |
| 1148.034 | 12.06    | 1147.94  | 12.14    | 1147.902 | 12.15    | 1147.827 | 12.17577 | 1147.757 |
| 1148.036 | 12.06681 | 1147.943 | 12.14655 | 1147.905 | 12.15566 | 1147.831 | 12.18    | 1147.76  |
| 1148.038 | 12.07    | 1147.944 | 12.15    | 1147.907 | 12.16    | 1147.833 | 12.18577 | 1147.764 |
| 1148.039 | 12.07681 | 1147.947 | 12.15655 | 1147.91  | 12.16566 | 1147.837 | 12.19    | 1147.767 |
| 1148.041 | 12.08    | 1147.949 | 12.16    | 1147.912 | 12.17    | 1147.839 | 12.19577 | 1147.771 |
| 1148.043 | 12.08681 | 1147.951 | 12.16655 | 1147.915 | 12.17566 | 1147.843 | 12.2     | 1147.774 |
| 1148.045 | 12.09    | 1147.953 | 12.17    | 1147.917 | 12.18    | 1147.845 | 12.20577 | 1147.778 |
| 1148.047 | 12.09681 | 1147.955 | 12.17655 | 1147.92  | 12.18566 | 1147.848 | 12.21    | 1147.781 |
| 1148.049 | 12.1     | 1147.957 | 12.18    | 1147.922 | 12.19    | 1147.851 | 12.21577 | 1147.784 |
| 1148.05  | 12.10681 | 1147.96  | 12.18655 | 1147.926 | 12.19566 | 1147.854 | 12.22    | 1147.787 |
| 1148.052 | 12.11    | 1147.961 | 12.19    | 1147.927 | 12.2     | 1147.857 | 12.22577 | 1147.791 |
| 1148.054 | 12.11681 | 1147.964 | 12.19655 | 1147.931 | 12.20566 | 1147.86  | 12.23    | 1147.794 |
| 1148.056 | 12.12    | 1147.965 | 12.2     | 1147.933 | 12.21    | 1147.863 | 12.23577 | 1147.798 |
| 1148.058 | 12.12681 | 1147.968 | 12.20655 | 1147.936 | 12.21566 | 1147.866 | 12.24    | 1147.801 |
| 1148.06  | 12.13    | 1147.97  | 12.21    | 1147.938 | 12.22    | 1147.869 | 12.24577 | 1147.805 |
| 1148.061 | 12.13681 | 1147.973 | 12.21655 | 1147.941 | 12.22566 | 1147.872 | 12.25    | 1147.807 |
| 1148.064 | 12.14    | 1147.974 | 12.22    | 1147.943 | 12.23    | 1147.875 | 12.25577 | 1147.811 |
| 1148.065 | 12.14681 | 1147.977 | 12.22655 | 1147.946 | 12.23566 | 1147.878 | 12.26    | 1147.814 |
| 1148.067 | 12.15    | 1147.978 | 12.23    | 1147.948 | 12.24    | 1147.881 | 12.26577 | 1147.818 |
| 1148.069 | 12.15681 | 1147.981 | 12.23655 | 1147.952 | 12.24566 | 1147.884 | 12.27    | 1147.821 |
| 1148.071 | 12.16    | 1147.983 | 12.24    | 1147.953 | 12.25    | 1147.887 | 12.27577 | 1147.825 |
| 1148.073 | 12.16681 | 1147.986 | 12.24655 | 1147.957 | 12.25566 | 1147.89  | 12.28    | 1147.828 |
| 1148.075 | 12.17    | 1147.987 | 12.25    | 1147.958 | 12.26    | 1147.893 | 12.28577 | 1147.831 |
| 1148.077 | 12.17681 | 1147.99  | 12.25655 | 1147.962 | 12.26566 | 1147.896 | 12.29    | 1147.834 |
| 1148.079 | 12.18    | 1147.992 | 12.26    | 1147.964 | 12.27    | 1147.899 | 12.29577 | 1147.838 |
| 1148.08  | 12.18681 | 1147.995 | 12.26655 | 1147.967 | 12.27566 | 1147.902 | 12.3     | 1147.841 |
| 1148.082 | 12.19    | 1147.996 | 12.27    | 1147.969 | 12.28    | 1147.905 | 12.30577 | 1147.845 |
| 1148.084 | 12.19681 | 1147.999 | 12.27655 | 1147.972 | 12.28566 | 1147.908 | 12.31    | 1147.848 |
| 1148.086 | 12.2     | 1148     | 12.28    | 1147.974 | 12.29    | 1147.91  | 12.31577 | 1147.851 |

|          |          |          |          |          |          |          |          |          |
|----------|----------|----------|----------|----------|----------|----------|----------|----------|
| 1148.088 | 12.20681 | 1148.004 | 12.28655 | 1147.977 | 12.29566 | 1147.914 | 12.32    | 1147.854 |
| 1148.09  | 12.21    | 1148.005 | 12.29    | 1147.979 | 12.3     | 1147.916 | 12.32577 | 1147.858 |
| 1148.092 | 12.21681 | 1148.008 | 12.29655 | 1147.983 | 12.30566 | 1147.92  | 12.33    | 1147.861 |
| 1148.094 | 12.22    | 1148.009 | 12.3     | 1147.984 | 12.31    | 1147.922 | 12.33577 | 1147.864 |
| 1148.095 | 12.22681 | 1148.013 | 12.30655 | 1147.988 | 12.31566 | 1147.925 | 12.34    | 1147.867 |
| 1148.098 | 12.23    | 1148.014 | 12.31    | 1147.989 | 12.32    | 1147.928 | 12.34577 | 1147.871 |
| 1148.099 | 12.23681 | 1148.017 | 12.31655 | 1147.993 | 12.32566 | 1147.931 | 12.35    | 1147.874 |
| 1148.101 | 12.24    | 1148.018 | 12.32    | 1147.995 | 12.33    | 1147.934 | 12.35577 | 1147.878 |
| 1148.103 | 12.24681 | 1148.021 | 12.32655 | 1147.998 | 12.33566 | 1147.937 | 12.36    | 1147.88  |
| 1148.105 | 12.25    | 1148.023 | 12.33    | 1148     | 12.34    | 1147.94  | 12.36577 | 1147.884 |
| 1148.107 | 12.25681 | 1148.026 | 12.33655 | 1148.003 | 12.34566 | 1147.943 | 12.37    | 1147.887 |
| 1148.109 | 12.26    | 1148.027 | 12.34    | 1148.005 | 12.35    | 1147.945 | 12.37577 | 1147.89  |
| 1148.111 | 12.26681 | 1148.03  | 12.34655 | 1148.008 | 12.35566 | 1147.949 | 12.38    | 1147.893 |
| 1148.113 | 12.27    | 1148.032 | 12.35    | 1148.01  | 12.36    | 1147.951 | 12.38577 | 1147.897 |
| 1148.114 | 12.27681 | 1148.035 | 12.35655 | 1148.013 | 12.36566 | 1147.954 | 12.39    | 1147.899 |
| 1148.116 | 12.28    | 1148.036 | 12.36    | 1148.015 | 12.37    | 1147.957 | 12.39577 | 1147.903 |
| 1148.118 | 12.28681 | 1148.039 | 12.36655 | 1148.018 | 12.37566 | 1147.96  | 12.4     | 1147.906 |
| 1148.12  | 12.29    | 1148.041 | 12.37    | 1148.02  | 12.38    | 1147.962 | 12.40577 | 1147.909 |
| 1148.122 | 12.29681 | 1148.044 | 12.37655 | 1148.023 | 12.38566 | 1147.966 | 12.41    | 1147.912 |
| 1148.124 | 12.3     | 1148.045 | 12.38    | 1148.025 | 12.39    | 1147.968 | 12.41577 | 1147.916 |
| 1148.125 | 12.30681 | 1148.048 | 12.38655 | 1148.028 | 12.39566 | 1147.971 | 12.42    | 1147.918 |
| 1148.127 | 12.31    | 1148.05  | 12.39    | 1148.03  | 12.4     | 1147.974 | 12.42577 | 1147.922 |
| 1148.129 | 12.31681 | 1148.053 | 12.39655 | 1148.033 | 12.40566 | 1147.977 | 12.43    | 1147.925 |
| 1148.131 | 12.32    | 1148.054 | 12.4     | 1148.035 | 12.41    | 1147.979 | 12.43577 | 1147.928 |
| 1148.133 | 12.32681 | 1148.057 | 12.40655 | 1148.038 | 12.41566 | 1147.982 | 12.44    | 1147.931 |
| 1148.135 | 12.33    | 1148.059 | 12.41    | 1148.039 | 12.42    | 1147.985 | 12.44577 | 1147.934 |
| 1148.136 | 12.33681 | 1148.062 | 12.41655 | 1148.043 | 12.42566 | 1147.988 | 12.45    | 1147.937 |
| 1148.138 | 12.34    | 1148.063 | 12.42    | 1148.044 | 12.43    | 1147.99  | 12.45577 | 1147.94  |
| 1148.14  | 12.34681 | 1148.066 | 12.42655 | 1148.047 | 12.43566 | 1147.993 | 12.46    | 1147.943 |
| 1148.142 | 12.35    | 1148.067 | 12.43    | 1148.049 | 12.44    | 1147.996 | 12.46577 | 1147.947 |
| 1148.144 | 12.35681 | 1148.07  | 12.43655 | 1148.052 | 12.44566 | 1147.999 | 12.47    | 1147.949 |
| 1148.146 | 12.36    | 1148.072 | 12.44    | 1148.054 | 12.45    | 1148.001 | 12.47577 | 1147.953 |
| 1148.147 | 12.36681 | 1148.075 | 12.44655 | 1148.057 | 12.45566 | 1148.004 | 12.48    | 1147.955 |
| 1148.149 | 12.37    | 1148.076 | 12.45    | 1148.059 | 12.46    | 1148.007 | 12.48577 | 1147.959 |
| 1148.151 | 12.37681 | 1148.079 | 12.45655 | 1148.062 | 12.46566 | 1148.01  | 12.49    | 1147.961 |
| 1148.153 | 12.38    | 1148.08  | 12.46    | 1148.063 | 12.47    | 1148.012 | 12.49577 | 1147.964 |
| 1148.154 | 12.38681 | 1148.083 | 12.46655 | 1148.066 | 12.47566 | 1148.015 | 12.5     | 1147.967 |
| 1148.156 | 12.39    | 1148.085 | 12.47    | 1148.068 | 12.48    | 1148.017 | 12.50577 | 1147.97  |
| 1148.158 | 12.39681 | 1148.088 | 12.47655 | 1148.071 | 12.48566 | 1148.02  | 12.51    | 1147.973 |
| 1148.16  | 12.4     | 1148.089 | 12.48    | 1148.073 | 12.49    | 1148.022 | 12.51577 | 1147.976 |
| 1148.161 | 12.40681 | 1148.092 | 12.48655 | 1148.076 | 12.49566 | 1148.025 | 12.52    | 1147.979 |
| 1148.163 | 12.41    | 1148.093 | 12.49    | 1148.077 | 12.5     | 1148.028 | 12.52577 | 1147.982 |
| 1148.165 | 12.41681 | 1148.096 | 12.49655 | 1148.08  | 12.50566 | 1148.031 | 12.53    | 1147.984 |
| 1148.166 | 12.42    | 1148.097 | 12.5     | 1148.082 | 12.51    | 1148.033 | 12.53577 | 1147.988 |
| 1148.168 | 12.42681 | 1148.1   | 12.50655 | 1148.085 | 12.51566 | 1148.036 | 12.54    | 1147.99  |
| 1148.17  | 12.43    | 1148.101 | 12.51    | 1148.086 | 12.52    | 1148.038 | 12.54577 | 1147.993 |
| 1148.171 | 12.43681 | 1148.104 | 12.51655 | 1148.089 | 12.52566 | 1148.041 | 12.55    | 1147.996 |

|          |          |          |          |          |          |          |          |          |
|----------|----------|----------|----------|----------|----------|----------|----------|----------|
| 1148.173 | 12.44    | 1148.106 | 12.52    | 1148.091 | 12.53    | 1148.043 | 12.55577 | 1147.999 |
| 1148.175 | 12.44681 | 1148.108 | 12.52655 | 1148.094 | 12.53566 | 1148.046 | 12.56    | 1148.001 |
| 1148.176 | 12.45    | 1148.11  | 12.53    | 1148.095 | 12.54    | 1148.048 | 12.56577 | 1148.005 |
| 1148.178 | 12.45681 | 1148.113 | 12.53655 | 1148.098 | 12.54566 | 1148.051 | 12.57    | 1148.007 |
| 1148.18  | 12.46    | 1148.114 | 12.54    | 1148.1   | 12.55    | 1148.053 | 12.57577 | 1148.01  |
| 1148.181 | 12.46681 | 1148.117 | 12.54655 | 1148.103 | 12.55566 | 1148.056 | 12.58    | 1148.013 |
| 1148.183 | 12.47    | 1148.118 | 12.55    | 1148.104 | 12.56    | 1148.058 | 12.58577 | 1148.016 |
| 1148.184 | 12.47681 | 1148.121 | 12.55655 | 1148.107 | 12.56566 | 1148.061 | 12.59    | 1148.018 |
| 1148.186 | 12.48    | 1148.122 | 12.56    | 1148.108 | 12.57    | 1148.063 | 12.59577 | 1148.021 |
| 1148.188 | 12.48681 | 1148.125 | 12.56655 | 1148.111 | 12.57566 | 1148.066 | 12.6     | 1148.023 |
| 1148.189 | 12.49    | 1148.126 | 12.57    | 1148.113 | 12.58    | 1148.068 | 12.60577 | 1148.026 |
| 1148.191 | 12.49681 | 1148.129 | 12.57655 | 1148.115 | 12.58566 | 1148.071 | 12.61    | 1148.029 |
| 1148.193 | 12.5     | 1148.13  | 12.58    | 1148.117 | 12.59    | 1148.073 | 12.61577 | 1148.032 |
| 1148.194 | 12.50681 | 1148.132 | 12.58655 | 1148.12  | 12.59566 | 1148.075 | 12.62    | 1148.034 |
| 1148.196 | 12.51    | 1148.134 | 12.59    | 1148.121 | 12.6     | 1148.077 | 12.62577 | 1148.037 |
| 1148.197 | 12.51681 | 1148.136 | 12.59655 | 1148.124 | 12.60566 | 1148.08  | 12.63    | 1148.039 |
| 1148.199 | 12.52    | 1148.138 | 12.6     | 1148.125 | 12.61    | 1148.082 | 12.63577 | 1148.042 |
| 1148.2   | 12.52681 | 1148.14  | 12.60655 | 1148.128 | 12.61566 | 1148.085 | 12.64    | 1148.045 |
| 1148.202 | 12.53    | 1148.141 | 12.61    | 1148.129 | 12.62    | 1148.087 | 12.64577 | 1148.047 |
| 1148.203 | 12.53681 | 1148.144 | 12.61655 | 1148.132 | 12.62566 | 1148.089 | 12.65    | 1148.05  |
| 1148.205 | 12.54    | 1148.145 | 12.62    | 1148.133 | 12.63    | 1148.091 | 12.65577 | 1148.053 |
| 1148.206 | 12.54681 | 1148.148 | 12.62655 | 1148.136 | 12.63566 | 1148.094 | 12.66    | 1148.055 |
| 1148.208 | 12.55    | 1148.149 | 12.63    | 1148.137 | 12.64    | 1148.096 | 12.66577 | 1148.058 |
| 1148.209 | 12.55681 | 1148.151 | 12.63655 | 1148.14  | 12.64566 | 1148.098 | 12.67    | 1148.06  |
| 1148.211 | 12.56    | 1148.153 | 12.64    | 1148.141 | 12.65    | 1148.1   | 12.67577 | 1148.063 |
| 1148.212 | 12.56681 | 1148.155 | 12.64655 | 1148.144 | 12.65566 | 1148.103 | 12.68    | 1148.065 |
| 1148.214 | 12.57    | 1148.156 | 12.65    | 1148.145 | 12.66    | 1148.105 | 12.68577 | 1148.068 |
| 1148.215 | 12.57681 | 1148.159 | 12.65655 | 1148.148 | 12.66566 | 1148.107 | 12.69    | 1148.07  |
| 1148.217 | 12.58    | 1148.16  | 12.66    | 1148.149 | 12.67    | 1148.109 | 12.69577 | 1148.073 |
| 1148.218 | 12.58681 | 1148.162 | 12.66655 | 1148.152 | 12.67566 | 1148.112 | 12.7     | 1148.075 |
| 1148.219 | 12.59    | 1148.164 | 12.67    | 1148.153 | 12.68    | 1148.114 | 12.70577 | 1148.077 |
| 1148.221 | 12.59681 | 1148.166 | 12.67655 | 1148.155 | 12.68566 | 1148.116 | 12.71    | 1148.079 |
| 1148.222 | 12.6     | 1148.167 | 12.68    | 1148.157 | 12.69    | 1148.118 | 12.71577 | 1148.082 |
| 1148.223 | 12.60681 | 1148.17  | 12.68655 | 1148.159 | 12.69566 | 1148.12  | 12.72    | 1148.084 |
| 1148.225 | 12.61    | 1148.171 | 12.69    | 1148.16  | 12.7     | 1148.122 | 12.72577 | 1148.087 |
| 1148.226 | 12.61681 | 1148.173 | 12.69655 | 1148.163 | 12.70566 | 1148.125 | 12.73    | 1148.089 |
| 1148.228 | 12.62    | 1148.174 | 12.7     | 1148.164 | 12.71    | 1148.126 | 12.73577 | 1148.092 |
| 1148.229 | 12.62681 | 1148.177 | 12.70655 | 1148.166 | 12.71566 | 1148.129 | 12.74    | 1148.094 |
| 1148.23  | 12.63    | 1148.178 | 12.71    | 1148.168 | 12.72    | 1148.131 | 12.74577 | 1148.096 |
| 1148.232 | 12.63681 | 1148.18  | 12.71655 | 1148.17  | 12.72566 | 1148.133 | 12.75    | 1148.098 |
| 1148.233 | 12.64    | 1148.181 | 12.72    | 1148.171 | 12.73    | 1148.135 | 12.75577 | 1148.101 |
| 1148.234 | 12.64681 | 1148.183 | 12.72655 | 1148.174 | 12.73566 | 1148.137 | 12.76    | 1148.103 |
| 1148.236 | 12.65    | 1148.184 | 12.73    | 1148.175 | 12.74    | 1148.139 | 12.76577 | 1148.105 |
| 1148.237 | 12.65681 | 1148.187 | 12.73655 | 1148.177 | 12.74566 | 1148.141 | 12.77    | 1148.107 |
| 1148.238 | 12.66    | 1148.188 | 12.74    | 1148.178 | 12.75    | 1148.143 | 12.77577 | 1148.11  |
| 1148.239 | 12.66681 | 1148.19  | 12.74655 | 1148.181 | 12.75566 | 1148.145 | 12.78    | 1148.112 |
| 1148.241 | 12.67    | 1148.191 | 12.75    | 1148.182 | 12.76    | 1148.147 | 12.78577 | 1148.114 |

|          |          |          |          |          |          |          |          |          |
|----------|----------|----------|----------|----------|----------|----------|----------|----------|
| 1148.242 | 12.67681 | 1148.193 | 12.75655 | 1148.184 | 12.76566 | 1148.149 | 12.79    | 1148.116 |
| 1148.243 | 12.68    | 1148.194 | 12.76    | 1148.185 | 12.77    | 1148.151 | 12.79577 | 1148.119 |
| 1148.245 | 12.68681 | 1148.196 | 12.76655 | 1148.187 | 12.77566 | 1148.153 | 12.8     | 1148.121 |
| 1148.246 | 12.69    | 1148.197 | 12.77    | 1148.189 | 12.78    | 1148.155 | 12.80577 | 1148.123 |
| 1148.247 | 12.69681 | 1148.2   | 12.77655 | 1148.191 | 12.78566 | 1148.157 | 12.81    | 1148.125 |
| 1148.248 | 12.7     | 1148.201 | 12.78    | 1148.192 | 12.79    | 1148.158 | 12.81577 | 1148.127 |
| 1148.249 | 12.70681 | 1148.203 | 12.78655 | 1148.194 | 12.79566 | 1148.161 | 12.82    | 1148.129 |
| 1148.251 | 12.71    | 1148.204 | 12.79    | 1148.195 | 12.8     | 1148.162 | 12.82577 | 1148.131 |
| 1148.252 | 12.71681 | 1148.206 | 12.79655 | 1148.197 | 12.80566 | 1148.164 | 12.83    | 1148.133 |
| 1148.253 | 12.72    | 1148.207 | 12.8     | 1148.199 | 12.81    | 1148.166 | 12.83577 | 1148.136 |
| 1148.254 | 12.72681 | 1148.209 | 12.80655 | 1148.201 | 12.81566 | 1148.168 | 12.84    | 1148.137 |
| 1148.256 | 12.73    | 1148.21  | 12.81    | 1148.202 | 12.82    | 1148.17  | 12.84577 | 1148.14  |
| 1148.257 | 12.73681 | 1148.212 | 12.81655 | 1148.204 | 12.82566 | 1148.172 | 12.85    | 1148.141 |
| 1148.258 | 12.74    | 1148.213 | 12.82    | 1148.205 | 12.83    | 1148.173 | 12.85577 | 1148.144 |
| 1148.259 | 12.74681 | 1148.215 | 12.82655 | 1148.207 | 12.83566 | 1148.175 | 12.86    | 1148.146 |
| 1148.26  | 12.75    | 1148.216 | 12.83    | 1148.208 | 12.84    | 1148.177 | 12.86577 | 1148.148 |
| 1148.261 | 12.75681 | 1148.218 | 12.83655 | 1148.21  | 12.84566 | 1148.179 | 12.87    | 1148.149 |
| 1148.263 | 12.76    | 1148.219 | 12.84    | 1148.211 | 12.85    | 1148.18  | 12.87577 | 1148.152 |
| 1148.264 | 12.76681 | 1148.221 | 12.84655 | 1148.213 | 12.85566 | 1148.182 | 12.88    | 1148.153 |
| 1148.265 | 12.77    | 1148.222 | 12.85    | 1148.214 | 12.86    | 1148.184 | 12.88577 | 1148.156 |
| 1148.266 | 12.77681 | 1148.224 | 12.85655 | 1148.216 | 12.86566 | 1148.186 | 12.89    | 1148.157 |
| 1148.267 | 12.78    | 1148.224 | 12.86    | 1148.217 | 12.87    | 1148.187 | 12.89577 | 1148.16  |
| 1148.268 | 12.78681 | 1148.226 | 12.86655 | 1148.219 | 12.87566 | 1148.189 | 12.9     | 1148.161 |
| 1148.269 | 12.79    | 1148.227 | 12.87    | 1148.22  | 12.88    | 1148.191 | 12.90577 | 1148.163 |
| 1148.27  | 12.79681 | 1148.229 | 12.87655 | 1148.222 | 12.88566 | 1148.193 | 12.91    | 1148.165 |
| 1148.271 | 12.8     | 1148.23  | 12.88    | 1148.223 | 12.89    | 1148.194 | 12.91577 | 1148.167 |
| 1148.272 | 12.80681 | 1148.232 | 12.88655 | 1148.225 | 12.89566 | 1148.196 | 12.92    | 1148.169 |
| 1148.273 | 12.81    | 1148.233 | 12.89    | 1148.226 | 12.9     | 1148.197 | 12.92577 | 1148.171 |
| 1148.274 | 12.81681 | 1148.235 | 12.89655 | 1148.228 | 12.90566 | 1148.199 | 12.93    | 1148.172 |
| 1148.276 | 12.82    | 1148.236 | 12.9     | 1148.229 | 12.91    | 1148.201 | 12.93577 | 1148.174 |
| 1148.276 | 12.82681 | 1148.237 | 12.90655 | 1148.231 | 12.91566 | 1148.202 | 12.94    | 1148.176 |
| 1148.278 | 12.83    | 1148.238 | 12.91    | 1148.231 | 12.92    | 1148.204 | 12.94577 | 1148.178 |
| 1148.279 | 12.83681 | 1148.24  | 12.91655 | 1148.233 | 12.92566 | 1148.206 | 12.95    | 1148.179 |
| 1148.28  | 12.84    | 1148.241 | 12.92    | 1148.234 | 12.93    | 1148.207 | 12.95577 | 1148.182 |
| 1148.281 | 12.84681 | 1148.243 | 12.92655 | 1148.236 | 12.93566 | 1148.209 | 12.96    | 1148.183 |
| 1148.282 | 12.85    | 1148.243 | 12.93    | 1148.237 | 12.94    | 1148.21  | 12.96577 | 1148.185 |
| 1148.283 | 12.85681 | 1148.245 | 12.93655 | 1148.239 | 12.94566 | 1148.212 | 12.97    | 1148.186 |
| 1148.284 | 12.86    | 1148.246 | 12.94    | 1148.24  | 12.95    | 1148.213 | 12.97577 | 1148.188 |
| 1148.285 | 12.86681 | 1148.248 | 12.94655 | 1148.241 | 12.95566 | 1148.215 | 12.98    | 1148.19  |
| 1148.286 | 12.87    | 1148.248 | 12.95    | 1148.242 | 12.96    | 1148.216 | 12.98577 | 1148.192 |
| 1148.286 | 12.87681 | 1148.25  | 12.95655 | 1148.244 | 12.96566 | 1148.218 | 12.99    | 1148.193 |
| 1148.288 | 12.88    | 1148.251 | 12.96    | 1148.245 | 12.97    | 1148.219 | 12.99577 | 1148.195 |
| 1148.288 | 12.88681 | 1148.253 | 12.96655 | 1148.247 | 12.97566 | 1148.221 | 13       | 1148.197 |
| 1148.289 | 12.89    | 1148.253 | 12.97    | 1148.247 | 12.98    | 1148.222 | 13.00577 | 1148.199 |
| 1148.29  | 12.89681 | 1148.255 | 12.97655 | 1148.249 | 12.98566 | 1148.224 | 13.01    | 1148.2   |
| 1148.291 | 12.9     | 1148.256 | 12.98    | 1148.25  | 12.99    | 1148.225 | 13.01577 | 1148.202 |
| 1148.292 | 12.90681 | 1148.257 | 12.98655 | 1148.252 | 12.99566 | 1148.227 | 13.02    | 1148.203 |



|          |          |          |          |          |          |          |          |          |
|----------|----------|----------|----------|----------|----------|----------|----------|----------|
| 1148.293 | 12.91    | 1148.258 | 12.99    | 1148.252 | 13       | 1148.228 | 13.02577 | 1148.205 |
| 1148.294 | 12.91681 | 1148.26  | 12.99655 | 1148.254 | 13.00566 | 1148.229 | 13.03    | 1148.206 |
| 1148.295 | 12.92    | 1148.261 | 13       | 1148.255 | 13.01    | 1148.231 | 13.03577 | 1148.208 |
| 1148.296 | 12.92681 | 1148.262 | 13.00655 | 1148.256 | 13.01566 | 1148.232 | 13.04    | 1148.21  |
| 1148.297 | 12.93    | 1148.263 | 13.01    | 1148.257 | 13.02    | 1148.233 | 13.04577 | 1148.211 |
| 1148.298 | 12.93681 | 1148.264 | 13.01655 | 1148.259 | 13.02566 | 1148.235 | 13.05    | 1148.213 |
| 1148.299 | 12.94    | 1148.265 | 13.02    | 1148.26  | 13.03    | 1148.236 | 13.05577 | 1148.214 |
| 1148.299 | 12.94681 | 1148.267 | 13.02655 | 1148.261 | 13.03566 | 1148.238 | 13.06    | 1148.216 |
| 1148.3   | 12.95    | 1148.267 | 13.03    | 1148.262 | 13.04    | 1148.239 | 13.06577 | 1148.217 |
| 1148.301 | 12.95681 | 1148.269 | 13.03655 | 1148.264 | 13.04566 | 1148.24  | 13.07    | 1148.219 |
| 1148.302 | 12.96    | 1148.27  | 13.04    | 1148.264 | 13.05    | 1148.242 | 13.07577 | 1148.22  |
| 1148.303 | 12.96681 | 1148.271 | 13.04655 | 1148.266 | 13.05566 | 1148.243 | 13.08    | 1148.222 |
| 1148.304 | 12.97    | 1148.272 | 13.05    | 1148.267 | 13.06    | 1148.244 | 13.08577 | 1148.223 |
| 1148.304 | 12.97681 | 1148.273 | 13.05655 | 1148.268 | 13.06566 | 1148.246 | 13.09    | 1148.225 |
| 1148.305 | 12.98    | 1148.274 | 13.06    | 1148.269 | 13.07    | 1148.247 | 13.09577 | 1148.226 |
| 1148.306 | 12.98681 | 1148.275 | 13.06655 | 1148.27  | 13.07566 | 1148.248 | 13.1     | 1148.227 |
| 1148.307 | 12.99    | 1148.276 | 13.07    | 1148.271 | 13.08    | 1148.249 | 13.10577 | 1148.229 |
| 1148.308 | 12.99681 | 1148.277 | 13.07655 | 1148.272 | 13.08566 | 1148.251 | 13.11    | 1148.23  |
| 1148.309 | 13       | 1148.278 | 13.08    | 1148.273 | 13.09    | 1148.252 | 13.11577 | 1148.232 |
| 1148.309 | 13.00681 | 1148.28  | 13.08655 | 1148.275 | 13.09566 | 1148.253 | 13.12    | 1148.233 |
| 1148.31  | 13.01    | 1148.28  | 13.09    | 1148.275 | 13.1     | 1148.254 | 13.12577 | 1148.235 |
| 1148.311 | 13.01681 | 1148.282 | 13.09655 | 1148.277 | 13.10566 | 1148.256 | 13.13    | 1148.236 |
| 1148.312 | 13.02    | 1148.282 | 13.1     | 1148.277 | 13.11    | 1148.257 | 13.13577 | 1148.237 |
| 1148.312 | 13.02681 | 1148.284 | 13.10655 | 1148.279 | 13.11566 | 1148.258 | 13.14    | 1148.239 |
| 1148.313 | 13.03    | 1148.284 | 13.11    | 1148.28  | 13.12    | 1148.259 | 13.14577 | 1148.24  |
| 1148.314 | 13.03681 | 1148.286 | 13.11655 | 1148.281 | 13.12566 | 1148.26  | 13.15    | 1148.241 |
| 1148.315 | 13.04    | 1148.286 | 13.12    | 1148.282 | 13.13    | 1148.261 | 13.15577 | 1148.243 |
| 1148.315 | 13.04681 | 1148.287 | 13.12655 | 1148.283 | 13.13566 | 1148.263 | 13.16    | 1148.244 |
| 1148.316 | 13.05    | 1148.288 | 13.13    | 1148.284 | 13.14    | 1148.264 | 13.16577 | 1148.245 |
| 1148.317 | 13.05681 | 1148.289 | 13.13655 | 1148.285 | 13.14566 | 1148.265 | 13.17    | 1148.246 |
| 1148.318 | 13.06    | 1148.29  | 13.14    | 1148.286 | 13.15    | 1148.266 | 13.17577 | 1148.248 |
| 1148.318 | 13.06681 | 1148.291 | 13.14655 | 1148.287 | 13.15566 | 1148.267 | 13.18    | 1148.249 |
| 1148.319 | 13.07    | 1148.292 | 13.15    | 1148.288 | 13.16    | 1148.268 | 13.18577 | 1148.251 |
| 1148.32  | 13.07681 | 1148.293 | 13.15655 | 1148.289 | 13.16566 | 1148.27  | 13.19    | 1148.252 |
| 1148.321 | 13.08    | 1148.294 | 13.16    | 1148.289 | 13.17    | 1148.271 | 13.19577 | 1148.253 |
| 1148.321 | 13.08681 | 1148.295 | 13.16655 | 1148.291 | 13.17566 | 1148.272 | 13.2     | 1148.254 |
| 1148.322 | 13.09    | 1148.296 | 13.17    | 1148.291 | 13.18    | 1148.273 | 13.20577 | 1148.255 |
| 1148.323 | 13.09681 | 1148.297 | 13.17655 | 1148.293 | 13.18566 | 1148.274 | 13.21    | 1148.257 |
| 1148.323 | 13.1     | 1148.297 | 13.18    | 1148.293 | 13.19    | 1148.275 | 13.21577 | 1148.258 |
| 1148.324 | 13.10681 | 1148.299 | 13.18655 | 1148.294 | 13.19566 | 1148.276 | 13.22    | 1148.259 |
| 1148.325 | 13.11    | 1148.299 | 13.19    | 1148.295 | 13.2     | 1148.277 | 13.22577 | 1148.26  |
| 1148.325 | 13.11681 | 1148.3   | 13.19655 | 1148.296 | 13.20566 | 1148.278 | 13.23    | 1148.261 |
| 1148.326 | 13.12    | 1148.301 | 13.2     | 1148.297 | 13.21    | 1148.279 | 13.23577 | 1148.263 |
| 1148.327 | 13.12681 | 1148.302 | 13.20655 | 1148.298 | 13.21566 | 1148.28  | 13.24    | 1148.264 |
| 1148.327 | 13.13    | 1148.303 | 13.21    | 1148.299 | 13.22    | 1148.281 | 13.24577 | 1148.265 |
| 1148.328 | 13.13681 | 1148.304 | 13.21655 | 1148.3   | 13.22566 | 1148.282 | 13.25    | 1148.266 |
| 1148.329 | 13.14    | 1148.304 | 13.22    | 1148.3   | 13.23    | 1148.283 | 13.25577 | 1148.267 |

|          |          |          |          |          |          |          |          |          |
|----------|----------|----------|----------|----------|----------|----------|----------|----------|
| 1148.329 | 13.14681 | 1148.305 | 13.22655 | 1148.302 | 13.23566 | 1148.284 | 13.26    | 1148.268 |
| 1148.33  | 13.15    | 1148.306 | 13.23    | 1148.302 | 13.24    | 1148.285 | 13.26577 | 1148.27  |
| 1148.331 | 13.15681 | 1148.307 | 13.23655 | 1148.303 | 13.24566 | 1148.286 | 13.27    | 1148.27  |
| 1148.331 | 13.16    | 1148.308 | 13.24    | 1148.304 | 13.25    | 1148.287 | 13.27577 | 1148.272 |
| 1148.332 | 13.16681 | 1148.309 | 13.24655 | 1148.305 | 13.25566 | 1148.288 | 13.28    | 1148.273 |
| 1148.333 | 13.17    | 1148.309 | 13.25    | 1148.306 | 13.26    | 1148.289 | 13.28577 | 1148.274 |
| 1148.333 | 13.17681 | 1148.31  | 13.25655 | 1148.307 | 13.26566 | 1148.29  | 13.29    | 1148.275 |
| 1148.334 | 13.18    | 1148.311 | 13.26    | 1148.307 | 13.27    | 1148.291 | 13.29577 | 1148.276 |
| 1148.334 | 13.18681 | 1148.312 | 13.26655 | 1148.308 | 13.27566 | 1148.292 | 13.3     | 1148.277 |
| 1148.335 | 13.19    | 1148.312 | 13.27    | 1148.309 | 13.28    | 1148.293 | 13.30577 | 1148.278 |
| 1148.335 | 13.19681 | 1148.313 | 13.27655 | 1148.31  | 13.28566 | 1148.294 | 13.31    | 1148.279 |
| 1148.336 | 13.2     | 1148.314 | 13.28    | 1148.31  | 13.29    | 1148.295 | 13.31577 | 1148.28  |
| 1148.337 | 13.20681 | 1148.315 | 13.28655 | 1148.312 | 13.29566 | 1148.296 | 13.32    | 1148.281 |
| 1148.337 | 13.21    | 1148.315 | 13.29    | 1148.312 | 13.3     | 1148.297 | 13.32577 | 1148.282 |
| 1148.338 | 13.21681 | 1148.316 | 13.29655 | 1148.313 | 13.30566 | 1148.298 | 13.33    | 1148.283 |
| 1148.338 | 13.22    | 1148.317 | 13.3     | 1148.314 | 13.31    | 1148.298 | 13.33577 | 1148.284 |
| 1148.339 | 13.22681 | 1148.318 | 13.30655 | 1148.315 | 13.31566 | 1148.299 | 13.34    | 1148.285 |
| 1148.34  | 13.23    | 1148.318 | 13.31    | 1148.315 | 13.32    | 1148.3   | 13.34577 | 1148.286 |
| 1148.34  | 13.23681 | 1148.319 | 13.31655 | 1148.316 | 13.32566 | 1148.301 | 13.35    | 1148.287 |
| 1148.341 | 13.24    | 1148.32  | 13.32    | 1148.317 | 13.33    | 1148.302 | 13.35577 | 1148.288 |
| 1148.341 | 13.24681 | 1148.321 | 13.32655 | 1148.318 | 13.33566 | 1148.303 | 13.36    | 1148.289 |
| 1148.342 | 13.25    | 1148.321 | 13.33    | 1148.318 | 13.34    | 1148.304 | 13.36577 | 1148.29  |
| 1148.342 | 13.25681 | 1148.322 | 13.33655 | 1148.319 | 13.34566 | 1148.305 | 13.37    | 1148.291 |
| 1148.343 | 13.26    | 1148.323 | 13.34    | 1148.32  | 13.35    | 1148.305 | 13.37577 | 1148.292 |
| 1148.343 | 13.26681 | 1148.324 | 13.34655 | 1148.321 | 13.35566 | 1148.306 | 13.38    | 1148.293 |
| 1148.344 | 13.27    | 1148.324 | 13.35    | 1148.321 | 13.36    | 1148.307 | 13.38577 | 1148.294 |
| 1148.344 | 13.27681 | 1148.325 | 13.35655 | 1148.322 | 13.36566 | 1148.308 | 13.39    | 1148.295 |
| 1148.345 | 13.28    | 1148.325 | 13.36    | 1148.322 | 13.37    | 1148.309 | 13.39577 | 1148.296 |
| 1148.345 | 13.28681 | 1148.326 | 13.36655 | 1148.323 | 13.37566 | 1148.31  | 13.4     | 1148.297 |
| 1148.346 | 13.29    | 1148.327 | 13.37    | 1148.324 | 13.38    | 1148.31  | 13.40577 | 1148.298 |
| 1148.346 | 13.29681 | 1148.328 | 13.37655 | 1148.325 | 13.38566 | 1148.311 | 13.41    | 1148.298 |
| 1148.347 | 13.3     | 1148.328 | 13.38    | 1148.325 | 13.39    | 1148.312 | 13.41577 | 1148.299 |
| 1148.347 | 13.30681 | 1148.329 | 13.38655 | 1148.326 | 13.39566 | 1148.313 | 13.42    | 1148.3   |
| 1148.348 | 13.31    | 1148.329 | 13.39    | 1148.327 | 13.4     | 1148.313 | 13.42577 | 1148.301 |
| 1148.348 | 13.31681 | 1148.33  | 13.39655 | 1148.327 | 13.40566 | 1148.314 | 13.43    | 1148.302 |
| 1148.349 | 13.32    | 1148.331 | 13.4     | 1148.328 | 13.41    | 1148.315 | 13.43577 | 1148.303 |
| 1148.349 | 13.32681 | 1148.332 | 13.40655 | 1148.329 | 13.41566 | 1148.316 | 13.44    | 1148.304 |
| 1148.35  | 13.33    | 1148.332 | 13.41    | 1148.329 | 13.42    | 1148.316 | 13.44577 | 1148.305 |
| 1148.35  | 13.33681 | 1148.333 | 13.41655 | 1148.33  | 13.42566 | 1148.317 | 13.45    | 1148.305 |
| 1148.351 | 13.34    | 1148.333 | 13.42    | 1148.33  | 13.43    | 1148.318 | 13.45577 | 1148.306 |
| 1148.351 | 13.34681 | 1148.334 | 13.42655 | 1148.331 | 13.43566 | 1148.319 | 13.46    | 1148.307 |
| 1148.352 | 13.35    | 1148.334 | 13.43    | 1148.332 | 13.44    | 1148.319 | 13.46577 | 1148.308 |
| 1148.352 | 13.35681 | 1148.335 | 13.43655 | 1148.333 | 13.44566 | 1148.32  | 13.47    | 1148.309 |
| 1148.353 | 13.36    | 1148.336 | 13.44    | 1148.333 | 13.45    | 1148.321 | 13.47577 | 1148.31  |
| 1148.353 | 13.36681 | 1148.336 | 13.44655 | 1148.334 | 13.45566 | 1148.322 | 13.48    | 1148.31  |
| 1148.354 | 13.37    | 1148.337 | 13.45    | 1148.334 | 13.46    | 1148.322 | 13.48577 | 1148.311 |
| 1148.354 | 13.37681 | 1148.338 | 13.45655 | 1148.335 | 13.46566 | 1148.323 | 13.49    | 1148.312 |

|          |          |          |          |          |          |          |          |          |
|----------|----------|----------|----------|----------|----------|----------|----------|----------|
| 1148.354 | 13.38    | 1148.338 | 13.46    | 1148.335 | 13.47    | 1148.324 | 13.49577 | 1148.313 |
| 1148.355 | 13.38681 | 1148.339 | 13.46655 | 1148.336 | 13.47566 | 1148.324 | 13.5     | 1148.313 |
| 1148.355 | 13.39    | 1148.339 | 13.47    | 1148.337 | 13.48    | 1148.325 | 13.50577 | 1148.314 |
| 1148.356 | 13.39681 | 1148.34  | 13.47655 | 1148.337 | 13.48566 | 1148.326 | 13.51    | 1148.315 |
| 1148.356 | 13.4     | 1148.34  | 13.48    | 1148.338 | 13.49    | 1148.326 | 13.51577 | 1148.316 |
| 1148.357 | 13.40681 | 1148.341 | 13.48655 | 1148.338 | 13.49566 | 1148.327 | 13.52    | 1148.316 |
| 1148.357 | 13.41    | 1148.341 | 13.49    | 1148.339 | 13.5     | 1148.328 | 13.52577 | 1148.317 |
| 1148.357 | 13.41681 | 1148.342 | 13.49655 | 1148.34  | 13.50566 | 1148.328 | 13.53    | 1148.318 |
| 1148.358 | 13.42    | 1148.342 | 13.5     | 1148.34  | 13.51    | 1148.329 | 13.53577 | 1148.319 |
| 1148.358 | 13.42681 | 1148.343 | 13.50655 | 1148.341 | 13.51566 | 1148.33  | 13.54    | 1148.319 |
| 1148.359 | 13.43    | 1148.343 | 13.51    | 1148.341 | 13.52    | 1148.33  | 13.54577 | 1148.32  |
| 1148.359 | 13.43681 | 1148.344 | 13.51655 | 1148.342 | 13.52566 | 1148.331 | 13.55    | 1148.321 |
| 1148.359 | 13.44    | 1148.344 | 13.52    | 1148.342 | 13.53    | 1148.332 | 13.55577 | 1148.322 |
| 1148.36  | 13.44681 | 1148.345 | 13.52655 | 1148.343 | 13.53566 | 1148.332 | 13.56    | 1148.322 |
| 1148.36  | 13.45    | 1148.346 | 13.53    | 1148.343 | 13.54    | 1148.333 | 13.56577 | 1148.323 |
| 1148.361 | 13.45681 | 1148.346 | 13.53655 | 1148.344 | 13.54566 | 1148.333 | 13.57    | 1148.324 |
| 1148.361 | 13.46    | 1148.347 | 13.54    | 1148.344 | 13.55    | 1148.334 | 13.57577 | 1148.324 |
| 1148.361 | 13.46681 | 1148.347 | 13.54655 | 1148.345 | 13.55566 | 1148.335 | 13.58    | 1148.325 |
| 1148.362 | 13.47    | 1148.348 | 13.55    | 1148.345 | 13.56    | 1148.335 | 13.58577 | 1148.326 |
| 1148.362 | 13.47681 | 1148.348 | 13.55655 | 1148.346 | 13.56566 | 1148.336 | 13.59    | 1148.326 |
| 1148.362 | 13.48    | 1148.348 | 13.56    | 1148.346 | 13.57    | 1148.336 | 13.59577 | 1148.327 |
| 1148.363 | 13.48681 | 1148.349 | 13.56655 | 1148.347 | 13.57566 | 1148.337 | 13.6     | 1148.328 |
| 1148.363 | 13.49    | 1148.349 | 13.57    | 1148.347 | 13.58    | 1148.338 | 13.60577 | 1148.328 |
| 1148.363 | 13.49681 | 1148.35  | 13.57655 | 1148.348 | 13.58566 | 1148.338 | 13.61    | 1148.329 |
| 1148.364 | 13.5     | 1148.35  | 13.58    | 1148.348 | 13.59    | 1148.339 | 13.61577 | 1148.33  |
| 1148.364 | 13.50681 | 1148.351 | 13.58655 | 1148.349 | 13.59566 | 1148.339 | 13.62    | 1148.33  |
| 1148.365 | 13.51    | 1148.351 | 13.59    | 1148.349 | 13.6     | 1148.34  | 13.62577 | 1148.331 |
| 1148.365 | 13.51681 | 1148.352 | 13.59655 | 1148.35  | 13.60566 | 1148.34  | 13.63    | 1148.332 |
| 1148.365 | 13.52    | 1148.352 | 13.6     | 1148.35  | 13.61    | 1148.341 | 13.63577 | 1148.332 |
| 1148.366 | 13.52681 | 1148.353 | 13.60655 | 1148.351 | 13.61566 | 1148.342 | 13.64    | 1148.333 |
| 1148.366 | 13.53    | 1148.353 | 13.61    | 1148.351 | 13.62    | 1148.342 | 13.64577 | 1148.334 |
| 1148.366 | 13.53681 | 1148.354 | 13.61655 | 1148.352 | 13.62566 | 1148.343 | 13.65    | 1148.334 |
| 1148.367 | 13.54    | 1148.354 | 13.62    | 1148.352 | 13.63    | 1148.343 | 13.65577 | 1148.335 |
| 1148.367 | 13.54681 | 1148.355 | 13.62655 | 1148.353 | 13.63566 | 1148.344 | 13.66    | 1148.335 |
| 1148.367 | 13.55    | 1148.355 | 13.63    | 1148.353 | 13.64    | 1148.344 | 13.66577 | 1148.336 |
| 1148.368 | 13.55681 | 1148.356 | 13.63655 | 1148.354 | 13.64566 | 1148.345 | 13.67    | 1148.336 |
| 1148.368 | 13.56    | 1148.356 | 13.64    | 1148.354 | 13.65    | 1148.345 | 13.67577 | 1148.337 |
| 1148.368 | 13.56681 | 1148.356 | 13.64655 | 1148.354 | 13.65566 | 1148.346 | 13.68    | 1148.338 |
| 1148.369 | 13.57    | 1148.357 | 13.65    | 1148.355 | 13.66    | 1148.346 | 13.68577 | 1148.338 |
| 1148.369 | 13.57681 | 1148.357 | 13.65655 | 1148.355 | 13.66566 | 1148.347 | 13.69    | 1148.339 |
| 1148.369 | 13.58    | 1148.357 | 13.66    | 1148.356 | 13.67    | 1148.347 | 13.69577 | 1148.339 |
| 1148.369 | 13.58681 | 1148.358 | 13.66655 | 1148.356 | 13.67566 | 1148.348 | 13.7     | 1148.34  |
| 1148.37  | 13.59    | 1148.358 | 13.67    | 1148.357 | 13.68    | 1148.348 | 13.70577 | 1148.341 |
| 1148.37  | 13.59681 | 1148.359 | 13.67655 | 1148.357 | 13.68566 | 1148.349 | 13.71    | 1148.341 |
| 1148.37  | 13.6     | 1148.359 | 13.68    | 1148.357 | 13.69    | 1148.349 | 13.71577 | 1148.342 |
| 1148.371 | 13.60681 | 1148.36  | 13.68655 | 1148.358 | 13.69566 | 1148.35  | 13.72    | 1148.342 |
| 1148.371 | 13.61    | 1148.36  | 13.69    | 1148.358 | 13.7     | 1148.35  | 13.72577 | 1148.343 |

|          |          |          |          |          |          |          |          |          |
|----------|----------|----------|----------|----------|----------|----------|----------|----------|
| 1148.371 | 13.61681 | 1148.36  | 13.69655 | 1148.359 | 13.70566 | 1148.351 | 13.73    | 1148.343 |
| 1148.372 | 13.62    | 1148.361 | 13.7     | 1148.359 | 13.71    | 1148.351 | 13.73577 | 1148.344 |
| 1148.372 | 13.62681 | 1148.361 | 13.70655 | 1148.359 | 13.71566 | 1148.352 | 13.74    | 1148.344 |
| 1148.372 | 13.63    | 1148.361 | 13.71    | 1148.36  | 13.72    | 1148.352 | 13.74577 | 1148.345 |
| 1148.372 | 13.63681 | 1148.362 | 13.71655 | 1148.36  | 13.72566 | 1148.353 | 13.75    | 1148.345 |
| 1148.373 | 13.64    | 1148.362 | 13.72    | 1148.361 | 13.73    | 1148.353 | 13.75577 | 1148.346 |
| 1148.373 | 13.64681 | 1148.363 | 13.72655 | 1148.361 | 13.73566 | 1148.353 | 13.76    | 1148.346 |
| 1148.373 | 13.65    | 1148.363 | 13.73    | 1148.361 | 13.74    | 1148.354 | 13.76577 | 1148.347 |
| 1148.374 | 13.65681 | 1148.363 | 13.73655 | 1148.362 | 13.74566 | 1148.354 | 13.77    | 1148.347 |
| 1148.374 | 13.66    | 1148.364 | 13.74    | 1148.362 | 13.75    | 1148.355 | 13.77577 | 1148.348 |
| 1148.374 | 13.66681 | 1148.364 | 13.74655 | 1148.363 | 13.75566 | 1148.355 | 13.78    | 1148.348 |
| 1148.374 | 13.67    | 1148.364 | 13.75    | 1148.363 | 13.76    | 1148.356 | 13.78577 | 1148.349 |
| 1148.375 | 13.67681 | 1148.365 | 13.75655 | 1148.363 | 13.76566 | 1148.356 | 13.79    | 1148.349 |
| 1148.375 | 13.68    | 1148.365 | 13.76    | 1148.364 | 13.77    | 1148.356 | 13.79577 | 1148.35  |
| 1148.375 | 13.68681 | 1148.365 | 13.76655 | 1148.364 | 13.77566 | 1148.357 | 13.8     | 1148.35  |
| 1148.375 | 13.69    | 1148.366 | 13.77    | 1148.364 | 13.78    | 1148.357 | 13.80577 | 1148.351 |
| 1148.376 | 13.69681 | 1148.366 | 13.77655 | 1148.365 | 13.78566 | 1148.358 | 13.81    | 1148.351 |
| 1148.376 | 13.7     | 1148.366 | 13.78    | 1148.365 | 13.79    | 1148.358 | 13.81577 | 1148.352 |
| 1148.376 | 13.70681 | 1148.367 | 13.78655 | 1148.365 | 13.79566 | 1148.359 | 13.82    | 1148.352 |
| 1148.376 | 13.71    | 1148.367 | 13.79    | 1148.366 | 13.8     | 1148.359 | 13.82577 | 1148.353 |
| 1148.377 | 13.71681 | 1148.367 | 13.79655 | 1148.366 | 13.80566 | 1148.359 | 13.83    | 1148.353 |
| 1148.377 | 13.72    | 1148.368 | 13.8     | 1148.366 | 13.81    | 1148.36  | 13.83577 | 1148.353 |
| 1148.377 | 13.72681 | 1148.368 | 13.80655 | 1148.367 | 13.81566 | 1148.36  | 13.84    | 1148.354 |
| 1148.377 | 13.73    | 1148.368 | 13.81    | 1148.367 | 13.82    | 1148.36  | 13.84577 | 1148.354 |
| 1148.378 | 13.73681 | 1148.369 | 13.81655 | 1148.367 | 13.82566 | 1148.361 | 13.85    | 1148.355 |
| 1148.378 | 13.74    | 1148.369 | 13.82    | 1148.368 | 13.83    | 1148.361 | 13.85577 | 1148.355 |
| 1148.378 | 13.74681 | 1148.369 | 13.82655 | 1148.368 | 13.83566 | 1148.362 | 13.86    | 1148.356 |
| 1148.378 | 13.75    | 1148.37  | 13.83    | 1148.368 | 13.84    | 1148.362 | 13.86577 | 1148.356 |
| 1148.378 | 13.75681 | 1148.37  | 13.83655 | 1148.369 | 13.84566 | 1148.362 | 13.87    | 1148.356 |
| 1148.379 | 13.76    | 1148.37  | 13.84    | 1148.369 | 13.85    | 1148.363 | 13.87577 | 1148.357 |
| 1148.379 | 13.76681 | 1148.371 | 13.84655 | 1148.369 | 13.85566 | 1148.363 | 13.88    | 1148.357 |
| 1148.379 | 13.77    | 1148.371 | 13.85    | 1148.369 | 13.86    | 1148.363 | 13.88577 | 1148.358 |
| 1148.379 | 13.77681 | 1148.371 | 13.85655 | 1148.37  | 13.86566 | 1148.364 | 13.89    | 1148.358 |
| 1148.38  | 13.78    | 1148.371 | 13.86    | 1148.37  | 13.87    | 1148.364 | 13.89577 | 1148.359 |
| 1148.38  | 13.78681 | 1148.372 | 13.86655 | 1148.37  | 13.87566 | 1148.365 | 13.9     | 1148.359 |
| 1148.38  | 13.79    | 1148.372 | 13.87    | 1148.371 | 13.88    | 1148.365 | 13.90577 | 1148.359 |
| 1148.38  | 13.79681 | 1148.372 | 13.87655 | 1148.371 | 13.88566 | 1148.365 | 13.91    | 1148.36  |
| 1148.38  | 13.8     | 1148.373 | 13.88    | 1148.371 | 13.89    | 1148.366 | 13.91577 | 1148.36  |
| 1148.381 | 13.80681 | 1148.373 | 13.88655 | 1148.372 | 13.89566 | 1148.366 | 13.92    | 1148.36  |
| 1148.381 | 13.81    | 1148.373 | 13.89    | 1148.372 | 13.9     | 1148.366 | 13.92577 | 1148.361 |
| 1148.381 | 13.81681 | 1148.373 | 13.89655 | 1148.372 | 13.90566 | 1148.367 | 13.93    | 1148.361 |
| 1148.381 | 13.82    | 1148.374 | 13.9     | 1148.372 | 13.91    | 1148.367 | 13.93577 | 1148.362 |
| 1148.381 | 13.82681 | 1148.374 | 13.90655 | 1148.373 | 13.91566 | 1148.367 | 13.94    | 1148.362 |
| 1148.382 | 13.83    | 1148.374 | 13.91    | 1148.373 | 13.92    | 1148.368 | 13.94577 | 1148.362 |
| 1148.382 | 13.83681 | 1148.375 | 13.91655 | 1148.373 | 13.92566 | 1148.368 | 13.95    | 1148.363 |
| 1148.382 | 13.84    | 1148.375 | 13.92    | 1148.374 | 13.93    | 1148.368 | 13.95577 | 1148.363 |
| 1148.382 | 13.84681 | 1148.375 | 13.92655 | 1148.374 | 13.93566 | 1148.369 | 13.96    | 1148.363 |

|          |          |          |          |          |          |          |          |          |
|----------|----------|----------|----------|----------|----------|----------|----------|----------|
| 1148.382 | 13.85    | 1148.375 | 13.93    | 1148.374 | 13.94    | 1148.369 | 13.96577 | 1148.364 |
| 1148.383 | 13.85681 | 1148.376 | 13.93655 | 1148.374 | 13.94566 | 1148.369 | 13.97    | 1148.364 |
| 1148.383 | 13.86    | 1148.376 | 13.94    | 1148.375 | 13.95    | 1148.369 | 13.97577 | 1148.365 |
| 1148.383 | 13.86681 | 1148.376 | 13.94655 | 1148.375 | 13.95566 | 1148.37  | 13.98    | 1148.365 |
| 1148.383 | 13.87    | 1148.376 | 13.95    | 1148.375 | 13.96    | 1148.37  | 13.98577 | 1148.365 |
| 1148.383 | 13.87681 | 1148.377 | 13.95655 | 1148.375 | 13.96566 | 1148.37  | 13.99    | 1148.366 |
| 1148.384 | 13.88    | 1148.377 | 13.96    | 1148.376 | 13.97    | 1148.371 | 13.99577 | 1148.366 |
| 1148.384 | 13.88681 | 1148.377 | 13.96655 | 1148.376 | 13.97566 | 1148.371 | 14       | 1148.366 |
| 1148.384 | 13.89    | 1148.377 | 13.97    | 1148.376 | 13.98    | 1148.371 | 14.00577 | 1148.367 |
| 1148.384 | 13.89681 | 1148.378 | 13.97655 | 1148.376 | 13.98566 | 1148.372 | 14.01    | 1148.367 |
| 1148.384 | 13.9     | 1148.378 | 13.98    | 1148.377 | 13.99    | 1148.372 | 14.01577 | 1148.367 |
| 1148.384 | 13.90681 | 1148.378 | 13.98655 | 1148.377 | 13.99566 | 1148.372 | 14.02    | 1148.368 |
| 1148.385 | 13.91    | 1148.378 | 13.99    | 1148.377 | 14       | 1148.372 | 14.02577 | 1148.368 |
| 1148.385 | 13.91681 | 1148.378 | 13.99655 | 1148.377 | 14.00566 | 1148.373 | 14.03    | 1148.368 |
| 1148.385 | 13.92    | 1148.379 | 14       | 1148.378 | 14.01    | 1148.373 | 14.03577 | 1148.369 |
| 1148.385 | 13.92681 | 1148.379 | 14.00655 | 1148.378 | 14.01566 | 1148.373 | 14.04    | 1148.369 |
| 1148.385 | 13.93    | 1148.379 | 14.01    | 1148.378 | 14.02    | 1148.373 | 14.04577 | 1148.369 |
| 1148.385 | 13.93681 | 1148.379 | 14.01655 | 1148.378 | 14.02566 | 1148.374 | 14.05    | 1148.369 |
| 1148.386 | 13.94    | 1148.379 | 14.02    | 1148.379 | 14.03    | 1148.374 | 14.05577 | 1148.37  |
| 1148.386 | 13.94681 | 1148.38  | 14.02655 | 1148.379 | 14.03566 | 1148.374 | 14.06    | 1148.37  |
| 1148.386 | 13.95    | 1148.38  | 14.03    | 1148.379 | 14.04    | 1148.375 | 14.06577 | 1148.37  |
| 1148.386 | 13.95681 | 1148.38  | 14.03655 | 1148.379 | 14.04566 | 1148.375 | 14.07    | 1148.371 |
| 1148.386 | 13.96    | 1148.38  | 14.04    | 1148.379 | 14.05    | 1148.375 | 14.07577 | 1148.371 |
| 1148.386 | 13.96681 | 1148.381 | 14.04655 | 1148.38  | 14.05566 | 1148.375 | 14.08    | 1148.371 |
| 1148.387 | 13.97    | 1148.381 | 14.05    | 1148.38  | 14.06    | 1148.376 | 14.08577 | 1148.372 |
| 1148.387 | 13.97681 | 1148.381 | 14.05655 | 1148.38  | 14.06566 | 1148.376 | 14.09    | 1148.372 |
| 1148.387 | 13.98    | 1148.381 | 14.06    | 1148.38  | 14.07    | 1148.376 | 14.09577 | 1148.372 |
| 1148.387 | 13.98681 | 1148.381 | 14.06655 | 1148.381 | 14.07566 | 1148.376 | 14.1     | 1148.372 |
| 1148.387 | 13.99    | 1148.382 | 14.07    | 1148.381 | 14.08    | 1148.377 | 14.10577 | 1148.373 |
| 1148.387 | 13.99681 | 1148.382 | 14.07655 | 1148.381 | 14.08566 | 1148.377 | 14.11    | 1148.373 |
| 1148.387 | 14       | 1148.382 | 14.08    | 1148.381 | 14.09    | 1148.377 | 14.11577 | 1148.373 |
| 1148.388 | 14.00681 | 1148.382 | 14.08655 | 1148.381 | 14.09566 | 1148.377 | 14.12    | 1148.373 |
| 1148.388 | 14.01    | 1148.382 | 14.09    | 1148.382 | 14.1     | 1148.378 | 14.12577 | 1148.374 |
| 1148.388 | 14.01681 | 1148.383 | 14.09655 | 1148.382 | 14.10566 | 1148.378 | 14.13    | 1148.374 |
| 1148.388 | 14.02    | 1148.383 | 14.1     | 1148.382 | 14.11    | 1148.378 | 14.13577 | 1148.374 |
| 1148.388 | 14.02681 | 1148.383 | 14.10655 | 1148.382 | 14.11566 | 1148.378 | 14.14    | 1148.375 |
| 1148.388 | 14.03    | 1148.383 | 14.11    | 1148.382 | 14.12    | 1148.378 | 14.14577 | 1148.375 |
| 1148.388 | 14.03681 | 1148.383 | 14.11655 | 1148.383 | 14.12566 | 1148.379 | 14.15    | 1148.375 |
| 1148.389 | 14.04    | 1148.383 | 14.12    | 1148.383 | 14.13    | 1148.379 | 14.15577 | 1148.375 |
| 1148.389 | 14.04681 | 1148.384 | 14.12655 | 1148.383 | 14.13566 | 1148.379 | 14.16    | 1148.376 |
| 1148.389 | 14.05    | 1148.384 | 14.13    | 1148.383 | 14.14    | 1148.379 | 14.16577 | 1148.376 |
| 1148.389 | 14.05681 | 1148.384 | 14.13655 | 1148.383 | 14.14566 | 1148.38  | 14.17    | 1148.376 |
| 1148.389 | 14.06    | 1148.384 | 14.14    | 1148.383 | 14.15    | 1148.38  | 14.17577 | 1148.376 |
| 1148.389 | 14.06681 | 1148.384 | 14.14655 | 1148.384 | 14.15566 | 1148.38  | 14.18    | 1148.377 |
| 1148.389 | 14.07    | 1148.385 | 14.15    | 1148.384 | 14.16    | 1148.38  | 14.18577 | 1148.377 |
| 1148.39  | 14.07681 | 1148.385 | 14.15655 | 1148.384 | 14.16566 | 1148.38  | 14.19    | 1148.377 |
| 1148.39  | 14.08    | 1148.385 | 14.16    | 1148.384 | 14.17    | 1148.381 | 14.19577 | 1148.377 |

|          |          |          |          |          |          |          |          |          |
|----------|----------|----------|----------|----------|----------|----------|----------|----------|
| 1148.39  | 14.08681 | 1148.385 | 14.16655 | 1148.384 | 14.17566 | 1148.381 | 14.2     | 1148.378 |
| 1148.39  | 14.09    | 1148.385 | 14.17    | 1148.384 | 14.18    | 1148.381 | 14.20577 | 1148.378 |
| 1148.39  | 14.09681 | 1148.385 | 14.17655 | 1148.385 | 14.18566 | 1148.381 | 14.21    | 1148.378 |
| 1148.39  | 14.1     | 1148.386 | 14.18    | 1148.385 | 14.19    | 1148.381 | 14.21577 | 1148.378 |
| 1148.39  | 14.10681 | 1148.386 | 14.18655 | 1148.385 | 14.19566 | 1148.382 | 14.22    | 1148.378 |
| 1148.39  | 14.11    | 1148.386 | 14.19    | 1148.385 | 14.2     | 1148.382 | 14.22577 | 1148.379 |
| 1148.39  | 14.11681 | 1148.386 | 14.19655 | 1148.385 | 14.20566 | 1148.382 | 14.23    | 1148.379 |
| 1148.391 | 14.12    | 1148.386 | 14.2     | 1148.385 | 14.21    | 1148.382 | 14.23577 | 1148.379 |
| 1148.391 | 14.12681 | 1148.386 | 14.20655 | 1148.386 | 14.21566 | 1148.382 | 14.24    | 1148.379 |
| 1148.391 | 14.13    | 1148.386 | 14.21    | 1148.386 | 14.22    | 1148.383 | 14.24577 | 1148.38  |
| 1148.391 | 14.13681 | 1148.387 | 14.21655 | 1148.386 | 14.22566 | 1148.383 | 14.25    | 1148.38  |
| 1148.391 | 14.14    | 1148.387 | 14.22    | 1148.386 | 14.23    | 1148.383 | 14.25577 | 1148.38  |
| 1148.391 | 14.14681 | 1148.387 | 14.22655 | 1148.386 | 14.23566 | 1148.383 | 14.26    | 1148.38  |
| 1148.391 | 14.15    | 1148.387 | 14.23    | 1148.386 | 14.24    | 1148.383 | 14.26577 | 1148.38  |
| 1148.391 | 14.15681 | 1148.387 | 14.23655 | 1148.387 | 14.24566 | 1148.384 | 14.27    | 1148.381 |
| 1148.392 | 14.16    | 1148.387 | 14.24    | 1148.387 | 14.25    | 1148.384 | 14.27577 | 1148.381 |
| 1148.392 | 14.16681 | 1148.388 | 14.24655 | 1148.387 | 14.25566 | 1148.384 | 14.28    | 1148.381 |
| 1148.392 | 14.17    | 1148.388 | 14.25    | 1148.387 | 14.26    | 1148.384 | 14.28577 | 1148.381 |
| 1148.392 | 14.17681 | 1148.388 | 14.25655 | 1148.387 | 14.26566 | 1148.384 | 14.29    | 1148.381 |
| 1148.392 | 14.18    | 1148.388 | 14.26    | 1148.387 | 14.27    | 1148.384 | 14.29577 | 1148.382 |
| 1148.392 | 14.18681 | 1148.388 | 14.26655 | 1148.388 | 14.27566 | 1148.385 | 14.3     | 1148.382 |
| 1148.392 | 14.19    | 1148.388 | 14.27    | 1148.388 | 14.28    | 1148.385 | 14.30577 | 1148.382 |
| 1148.392 | 14.19681 | 1148.388 | 14.27655 | 1148.388 | 14.28566 | 1148.385 | 14.31    | 1148.382 |
| 1148.392 | 14.2     | 1148.389 | 14.28    | 1148.388 | 14.29    | 1148.385 | 14.31577 | 1148.382 |
| 1148.392 | 14.20681 | 1148.389 | 14.28655 | 1148.388 | 14.29566 | 1148.385 | 14.32    | 1148.383 |
| 1148.393 | 14.21    | 1148.389 | 14.29    | 1148.388 | 14.3     | 1148.385 | 14.32577 | 1148.383 |
| 1148.393 | 14.21681 | 1148.389 | 14.29655 | 1148.388 | 14.30566 | 1148.386 | 14.33    | 1148.383 |
| 1148.393 | 14.22    | 1148.389 | 14.3     | 1148.388 | 14.31    | 1148.386 | 14.33577 | 1148.383 |
| 1148.393 | 14.22681 | 1148.389 | 14.30655 | 1148.389 | 14.31566 | 1148.386 | 14.34    | 1148.383 |
| 1148.393 | 14.23    | 1148.389 | 14.31    | 1148.389 | 14.32    | 1148.386 | 14.34577 | 1148.384 |
| 1148.393 | 14.23681 | 1148.389 | 14.31655 | 1148.389 | 14.32566 | 1148.386 | 14.35    | 1148.384 |
| 1148.393 | 14.24    | 1148.39  | 14.32    | 1148.389 | 14.33    | 1148.386 | 14.35577 | 1148.384 |
| 1148.393 | 14.24681 | 1148.39  | 14.32655 | 1148.389 | 14.33566 | 1148.387 | 14.36    | 1148.384 |
| 1148.393 | 14.25    | 1148.39  | 14.33    | 1148.389 | 14.34    | 1148.387 | 14.36577 | 1148.384 |
| 1148.393 | 14.25681 | 1148.39  | 14.33655 | 1148.389 | 14.34566 | 1148.387 | 14.37    | 1148.384 |
| 1148.393 | 14.26    | 1148.39  | 14.34    | 1148.39  | 14.35    | 1148.387 | 14.37577 | 1148.385 |
| 1148.394 | 14.26681 | 1148.39  | 14.34655 | 1148.39  | 14.35566 | 1148.387 | 14.38    | 1148.385 |
| 1148.394 | 14.27    | 1148.39  | 14.35    | 1148.39  | 14.36    | 1148.387 | 14.38577 | 1148.385 |
| 1148.394 | 14.27681 | 1148.39  | 14.35655 | 1148.39  | 14.36566 | 1148.387 | 14.39    | 1148.385 |
| 1148.394 | 14.28    | 1148.391 | 14.36    | 1148.39  | 14.37    | 1148.388 | 14.39577 | 1148.385 |
| 1148.394 | 14.28681 | 1148.391 | 14.36655 | 1148.39  | 14.37566 | 1148.388 | 14.4     | 1148.385 |
| 1148.394 | 14.29    | 1148.391 | 14.37    | 1148.39  | 14.38    | 1148.388 | 14.40577 | 1148.386 |
| 1148.394 | 14.29681 | 1148.391 | 14.37655 | 1148.39  | 14.38566 | 1148.388 | 14.41    | 1148.386 |
| 1148.394 | 14.3     | 1148.391 | 14.38    | 1148.391 | 14.39    | 1148.388 | 14.41577 | 1148.386 |
| 1148.394 | 14.30681 | 1148.391 | 14.38655 | 1148.391 | 14.39566 | 1148.388 | 14.42    | 1148.386 |
| 1148.394 | 14.31    | 1148.391 | 14.39    | 1148.391 | 14.4     | 1148.388 | 14.42577 | 1148.386 |
| 1148.394 | 14.31681 | 1148.391 | 14.39655 | 1148.391 | 14.40566 | 1148.389 | 14.43    | 1148.386 |

|          |          |          |          |          |          |          |          |          |
|----------|----------|----------|----------|----------|----------|----------|----------|----------|
| 1148.395 | 14.32    | 1148.391 | 14.4     | 1148.391 | 14.41    | 1148.389 | 14.43577 | 1148.387 |
| 1148.395 | 14.32681 | 1148.392 | 14.40655 | 1148.391 | 14.41566 | 1148.389 | 14.44    | 1148.387 |
| 1148.395 | 14.33    | 1148.392 | 14.41    | 1148.391 | 14.42    | 1148.389 | 14.44577 | 1148.387 |
| 1148.395 | 14.33681 | 1148.392 | 14.41655 | 1148.391 | 14.42566 | 1148.389 | 14.45    | 1148.387 |
| 1148.395 | 14.34    | 1148.392 | 14.42    | 1148.391 | 14.43    | 1148.389 | 14.45577 | 1148.387 |
| 1148.395 | 14.34681 | 1148.392 | 14.42655 | 1148.392 | 14.43566 | 1148.389 | 14.46    | 1148.387 |
| 1148.395 | 14.35    | 1148.392 | 14.43    | 1148.392 | 14.44    | 1148.39  | 14.46577 | 1148.388 |
| 1148.395 | 14.35681 | 1148.392 | 14.43655 | 1148.392 | 14.44566 | 1148.39  | 14.47    | 1148.388 |
| 1148.395 | 14.36    | 1148.392 | 14.44    | 1148.392 | 14.45    | 1148.39  | 14.47577 | 1148.388 |
| 1148.395 | 14.36681 | 1148.392 | 14.44655 | 1148.392 | 14.45566 | 1148.39  | 14.48    | 1148.388 |
| 1148.395 | 14.37    | 1148.392 | 14.45    | 1148.392 | 14.46    | 1148.39  | 14.48577 | 1148.388 |
| 1148.395 | 14.37681 | 1148.393 | 14.45655 | 1148.392 | 14.46566 | 1148.39  | 14.49    | 1148.388 |
| 1148.395 | 14.38    | 1148.393 | 14.46    | 1148.392 | 14.47    | 1148.39  | 14.49577 | 1148.388 |
| 1148.395 | 14.38681 | 1148.393 | 14.46655 | 1148.392 | 14.47566 | 1148.39  | 14.5     | 1148.388 |
| 1148.396 | 14.39    | 1148.393 | 14.47    | 1148.392 | 14.48    | 1148.39  | 14.50577 | 1148.389 |
| 1148.396 | 14.39681 | 1148.393 | 14.47655 | 1148.393 | 14.48566 | 1148.391 | 14.51    | 1148.389 |
| 1148.396 | 14.4     | 1148.393 | 14.48    | 1148.393 | 14.49    | 1148.391 | 14.51577 | 1148.389 |
| 1148.396 | 14.40681 | 1148.393 | 14.48655 | 1148.393 | 14.49566 | 1148.391 | 14.52    | 1148.389 |
| 1148.396 | 14.41    | 1148.393 | 14.49    | 1148.393 | 14.5     | 1148.391 | 14.52577 | 1148.389 |
| 1148.396 | 14.41681 | 1148.393 | 14.49655 | 1148.393 | 14.50566 | 1148.391 | 14.53    | 1148.389 |
| 1148.396 | 14.42    | 1148.393 | 14.5     | 1148.393 | 14.51    | 1148.391 | 14.53577 | 1148.389 |
| 1148.396 | 14.42681 | 1148.394 | 14.50655 | 1148.393 | 14.51566 | 1148.391 | 14.54    | 1148.39  |
| 1148.396 | 14.43    | 1148.394 | 14.51    | 1148.393 | 14.52    | 1148.391 | 14.54577 | 1148.39  |
| 1148.396 | 14.43681 | 1148.394 | 14.51655 | 1148.393 | 14.52566 | 1148.392 | 14.55    | 1148.39  |
| 1148.396 | 14.44    | 1148.394 | 14.52    | 1148.393 | 14.53    | 1148.392 | 14.55577 | 1148.39  |
| 1148.396 | 14.44681 | 1148.394 | 14.52655 | 1148.394 | 14.53566 | 1148.392 | 14.56    | 1148.39  |
| 1148.396 | 14.45    | 1148.394 | 14.53    | 1148.394 | 14.54    | 1148.392 | 14.56577 | 1148.39  |
| 1148.396 | 14.45681 | 1148.394 | 14.53655 | 1148.394 | 14.54566 | 1148.392 | 14.57    | 1148.39  |
| 1148.396 | 14.46    | 1148.394 | 14.54    | 1148.394 | 14.55    | 1148.392 | 14.57577 | 1148.39  |
| 1148.397 | 14.46681 | 1148.394 | 14.54655 | 1148.394 | 14.55566 | 1148.392 | 14.58    | 1148.39  |
| 1148.397 | 14.47    | 1148.394 | 14.55    | 1148.394 | 14.56    | 1148.392 | 14.58577 | 1148.391 |
| 1148.397 | 14.47681 | 1148.394 | 14.55655 | 1148.394 | 14.56566 | 1148.392 | 14.59    | 1148.391 |
| 1148.397 | 14.48    | 1148.394 | 14.56    | 1148.394 | 14.57    | 1148.392 | 14.59577 | 1148.391 |
| 1148.397 | 14.48681 | 1148.395 | 14.56655 | 1148.394 | 14.57566 | 1148.393 | 14.6     | 1148.391 |
| 1148.397 | 14.49    | 1148.395 | 14.57    | 1148.394 | 14.58    | 1148.393 | 14.60577 | 1148.391 |
| 1148.397 | 14.49681 | 1148.395 | 14.57655 | 1148.394 | 14.58566 | 1148.393 | 14.61    | 1148.391 |
| 1148.397 | 14.5     | 1148.395 | 14.58    | 1148.394 | 14.59    | 1148.393 | 14.61577 | 1148.391 |
| 1148.397 | 14.50681 | 1148.395 | 14.58655 | 1148.395 | 14.59566 | 1148.393 | 14.62    | 1148.391 |
| 1148.397 | 14.51    | 1148.395 | 14.59    | 1148.395 | 14.6     | 1148.393 | 14.62577 | 1148.392 |
| 1148.397 | 14.51681 | 1148.395 | 14.59655 | 1148.395 | 14.60566 | 1148.393 | 14.63    | 1148.392 |
| 1148.397 | 14.52    | 1148.395 | 14.6     | 1148.395 | 14.61    | 1148.393 | 14.63577 | 1148.392 |
| 1148.397 | 14.52681 | 1148.395 | 14.60655 | 1148.395 | 14.61566 | 1148.393 | 14.64    | 1148.392 |
| 1148.397 | 14.53    | 1148.395 | 14.61    | 1148.395 | 14.62    | 1148.393 | 14.64577 | 1148.392 |
| 1148.397 | 14.53681 | 1148.395 | 14.61655 | 1148.395 | 14.62566 | 1148.393 | 14.65    | 1148.392 |
| 1148.397 | 14.54    | 1148.395 | 14.62    | 1148.395 | 14.63    | 1148.394 | 14.65577 | 1148.392 |
| 1148.397 | 14.54681 | 1148.395 | 14.62655 | 1148.395 | 14.63566 | 1148.394 | 14.66    | 1148.392 |
| 1148.398 | 14.55    | 1148.396 | 14.63    | 1148.395 | 14.64    | 1148.394 | 14.66577 | 1148.392 |

|          |          |          |          |          |          |          |          |          |
|----------|----------|----------|----------|----------|----------|----------|----------|----------|
| 1148.398 | 14.55681 | 1148.396 | 14.63655 | 1148.395 | 14.64566 | 1148.394 | 14.67    | 1148.392 |
| 1148.398 | 14.56    | 1148.396 | 14.64    | 1148.395 | 14.65    | 1148.394 | 14.67577 | 1148.393 |
| 1148.398 | 14.56681 | 1148.396 | 14.64655 | 1148.395 | 14.65566 | 1148.394 | 14.68    | 1148.393 |
| 1148.398 | 14.57    | 1148.396 | 14.65    | 1148.396 | 14.66    | 1148.394 | 14.68577 | 1148.393 |
| 1148.398 | 14.57681 | 1148.396 | 14.65655 | 1148.396 | 14.66566 | 1148.394 | 14.69    | 1148.393 |
| 1148.398 | 14.58    | 1148.396 | 14.66    | 1148.396 | 14.67    | 1148.394 | 14.69577 | 1148.393 |
| 1148.398 | 14.58681 | 1148.396 | 14.66655 | 1148.396 | 14.67566 | 1148.394 | 14.7     | 1148.393 |
| 1148.398 | 14.59    | 1148.396 | 14.67    | 1148.396 | 14.68    | 1148.394 | 14.70577 | 1148.393 |
| 1148.398 | 14.59681 | 1148.396 | 14.67655 | 1148.396 | 14.68566 | 1148.395 | 14.71    | 1148.393 |
| 1148.398 | 14.6     | 1148.396 | 14.68    | 1148.396 | 14.69    | 1148.395 | 14.71577 | 1148.393 |
| 1148.398 | 14.60681 | 1148.396 | 14.68655 | 1148.396 | 14.69566 | 1148.395 | 14.72    | 1148.393 |
| 1148.398 | 14.61    | 1148.396 | 14.69    | 1148.396 | 14.7     | 1148.395 | 14.72577 | 1148.394 |
| 1148.398 | 14.61681 | 1148.396 | 14.69655 | 1148.396 | 14.70566 | 1148.395 | 14.73    | 1148.394 |
| 1148.398 | 14.62    | 1148.396 | 14.7     | 1148.396 | 14.71    | 1148.395 | 14.73577 | 1148.394 |
| 1148.398 | 14.62681 | 1148.397 | 14.70655 | 1148.396 | 14.71566 | 1148.395 | 14.74    | 1148.394 |
| 1148.398 | 14.63    | 1148.397 | 14.71    | 1148.396 | 14.72    | 1148.395 | 14.74577 | 1148.394 |
| 1148.398 | 14.63681 | 1148.397 | 14.71655 | 1148.396 | 14.72566 | 1148.395 | 14.75    | 1148.394 |
| 1148.398 | 14.64    | 1148.397 | 14.72    | 1148.396 | 14.73    | 1148.395 | 14.75577 | 1148.394 |
| 1148.398 | 14.64681 | 1148.397 | 14.72655 | 1148.397 | 14.73566 | 1148.395 | 14.76    | 1148.394 |
| 1148.398 | 14.65    | 1148.397 | 14.73    | 1148.397 | 14.74    | 1148.395 | 14.76577 | 1148.394 |
| 1148.398 | 14.65681 | 1148.397 | 14.73655 | 1148.397 | 14.74566 | 1148.395 | 14.77    | 1148.394 |
| 1148.399 | 14.66    | 1148.397 | 14.74    | 1148.397 | 14.75    | 1148.395 | 14.77577 | 1148.394 |
| 1148.399 | 14.66681 | 1148.397 | 14.74655 | 1148.397 | 14.75566 | 1148.396 | 14.78    | 1148.394 |
| 1148.399 | 14.67    | 1148.397 | 14.75    | 1148.397 | 14.76    | 1148.396 | 14.78577 | 1148.395 |
| 1148.399 | 14.67681 | 1148.397 | 14.75655 | 1148.397 | 14.76566 | 1148.396 | 14.79    | 1148.395 |
| 1148.399 | 14.68    | 1148.397 | 14.76    | 1148.397 | 14.77    | 1148.396 | 14.79577 | 1148.395 |
| 1148.399 | 14.68681 | 1148.397 | 14.76655 | 1148.397 | 14.77566 | 1148.396 | 14.8     | 1148.395 |
| 1148.399 | 14.69    | 1148.397 | 14.77    | 1148.397 | 14.78    | 1148.396 | 14.80577 | 1148.395 |
| 1148.399 | 14.69681 | 1148.397 | 14.77655 | 1148.397 | 14.78566 | 1148.396 | 14.81    | 1148.395 |
| 1148.399 | 14.7     | 1148.397 | 14.78    | 1148.397 | 14.79    | 1148.396 | 14.81577 | 1148.395 |
| 1148.399 | 14.70681 | 1148.397 | 14.78655 | 1148.397 | 14.79566 | 1148.396 | 14.82    | 1148.395 |
| 1148.399 | 14.71    | 1148.397 | 14.79    | 1148.397 | 14.8     | 1148.396 | 14.82577 | 1148.395 |
| 1148.399 | 14.71681 | 1148.398 | 14.79655 | 1148.397 | 14.80566 | 1148.396 | 14.83    | 1148.395 |
| 1148.399 | 14.72    | 1148.398 | 14.8     | 1148.397 | 14.81    | 1148.396 | 14.83577 | 1148.395 |
| 1148.399 | 14.72681 | 1148.398 | 14.80655 | 1148.397 | 14.81566 | 1148.396 | 14.84    | 1148.395 |
| 1148.399 | 14.73    | 1148.398 | 14.81    | 1148.397 | 14.82    | 1148.396 | 14.84577 | 1148.395 |
| 1148.399 | 14.73681 | 1148.398 | 14.81655 | 1148.398 | 14.82566 | 1148.396 | 14.85    | 1148.395 |
| 1148.399 | 14.74    | 1148.398 | 14.82    | 1148.398 | 14.83    | 1148.397 | 14.85577 | 1148.396 |
| 1148.399 | 14.74681 | 1148.398 | 14.82655 | 1148.398 | 14.83566 | 1148.397 | 14.86    | 1148.396 |
| 1148.399 | 14.75    | 1148.398 | 14.83    | 1148.398 | 14.84    | 1148.397 | 14.86577 | 1148.396 |
| 1148.399 | 14.75681 | 1148.398 | 14.83655 | 1148.398 | 14.84566 | 1148.397 | 14.87    | 1148.396 |
| 1148.399 | 14.76    | 1148.398 | 14.84    | 1148.398 | 14.85    | 1148.397 | 14.87577 | 1148.396 |
| 1148.399 | 14.76681 | 1148.398 | 14.84655 | 1148.398 | 14.85566 | 1148.397 | 14.88    | 1148.396 |
| 1148.399 | 14.77    | 1148.398 | 14.85    | 1148.398 | 14.86    | 1148.397 | 14.88577 | 1148.396 |
| 1148.399 | 14.77681 | 1148.398 | 14.85655 | 1148.398 | 14.86566 | 1148.397 | 14.89    | 1148.396 |
| 1148.399 | 14.78    | 1148.398 | 14.86    | 1148.398 | 14.87    | 1148.397 | 14.89577 | 1148.396 |
| 1148.399 | 14.78681 | 1148.398 | 14.86655 | 1148.398 | 14.87566 | 1148.397 | 14.9     | 1148.396 |



|          |          |          |          |          |          |          |          |          |
|----------|----------|----------|----------|----------|----------|----------|----------|----------|
| 1148.4   | 14.79    | 1148.398 | 14.87    | 1148.398 | 14.88    | 1148.397 | 14.90577 | 1148.396 |
| 1148.4   | 14.79681 | 1148.398 | 14.87655 | 1148.398 | 14.88566 | 1148.397 | 14.91    | 1148.396 |
| 1148.4   | 14.8     | 1148.398 | 14.88    | 1148.398 | 14.89    | 1148.397 | 14.91577 | 1148.396 |
| 1148.4   | 14.80681 | 1148.398 | 14.88655 | 1148.398 | 14.89566 | 1148.397 | 14.92    | 1148.396 |
| 1148.4   | 14.81    | 1148.398 | 14.89    | 1148.398 | 14.9     | 1148.397 | 14.92577 | 1148.396 |
| 1148.4   | 14.81681 | 1148.398 | 14.89655 | 1148.398 | 14.90566 | 1148.397 | 14.93    | 1148.397 |
| 1148.4   | 14.82    | 1148.399 | 14.9     | 1148.398 | 14.91    | 1148.397 | 14.93577 | 1148.397 |
| 1148.4   | 14.82681 | 1148.399 | 14.90655 | 1148.398 | 14.91566 | 1148.398 | 14.94    | 1148.397 |
| 1148.4   | 14.83    | 1148.399 | 14.91    | 1148.398 | 14.92    | 1148.398 | 14.94577 | 1148.397 |
| 1148.4   | 14.83681 | 1148.399 | 14.91655 | 1148.398 | 14.92566 | 1148.398 | 14.95    | 1148.397 |
| 1148.4   | 14.84    | 1148.399 | 14.92    | 1148.399 | 14.93    | 1148.398 | 14.95577 | 1148.397 |
| 1148.4   | 14.84681 | 1148.399 | 14.92655 | 1148.399 | 14.93566 | 1148.398 | 14.96    | 1148.397 |
| 1148.4   | 14.85    | 1148.399 | 14.93    | 1148.399 | 14.94    | 1148.398 | 14.96577 | 1148.397 |
| 1148.4   | 14.85681 | 1148.399 | 14.93655 | 1148.399 | 14.94566 | 1148.398 | 14.97    | 1148.397 |
| 1148.4   | 14.86    | 1148.399 | 14.94    | 1148.399 | 14.95    | 1148.398 | 14.97577 | 1148.397 |
| 1148.4   | 14.86681 | 1148.399 | 14.94655 | 1148.399 | 14.95566 | 1148.398 | 14.98    | 1148.397 |
| 1148.4   | 14.87    | 1148.399 | 14.95    | 1148.399 | 14.96    | 1148.398 | 14.98577 | 1148.397 |
| 1148.4   | 14.87681 | 1148.399 | 14.95655 | 1148.399 | 14.96566 | 1148.398 | 14.99    | 1148.397 |
| 1148.4   | 14.88    | 1148.399 | 14.96    | 1148.399 | 14.97    | 1148.398 | 14.99577 | 1148.397 |
| 1148.4   | 14.88681 | 1148.399 | 14.96655 | 1148.399 | 14.97566 | 1148.398 | 15       | 1148.397 |
| 1148.4   | 14.89    | 1148.399 | 14.97    | 1148.399 | 14.98    | 1148.398 | 15.00577 | 1148.397 |
| 1148.4   | 14.89681 | 1148.399 | 14.97655 | 1148.399 | 14.98566 | 1148.398 | 15.01    | 1148.397 |
| 1148.4   | 14.9     | 1148.399 | 14.98    | 1148.399 | 14.99    | 1148.398 | 15.01577 | 1148.398 |
| 1148.4   | 14.90681 | 1148.399 | 14.98655 | 1148.399 | 14.99566 | 1148.398 | 15.02    | 1148.398 |
| 1148.4   | 14.91    | 1148.399 | 14.99    | 1148.399 | 15       | 1148.398 | 15.02577 | 1148.398 |
| 1148.4   | 14.91681 | 1148.399 | 14.99655 | 1148.399 | 15.00566 | 1148.398 | 15.03    | 1148.398 |
| 1148.4   | 14.92    | 1148.399 | 15       | 1148.399 | 15.01    | 1148.398 | 15.03577 | 1148.398 |
| 1148.4   | 14.92681 | 1148.399 | 15.00655 | 1148.399 | 15.01566 | 1148.398 | 15.04    | 1148.398 |
| 1148.4   | 14.93    | 1148.399 | 15.01    | 1148.399 | 15.02    | 1148.398 | 15.04577 | 1148.398 |
| 1148.4   | 14.93681 | 1148.399 | 15.01655 | 1148.399 | 15.02566 | 1148.399 | 15.05    | 1148.398 |
| 1148.4   | 14.94    | 1148.399 | 15.02    | 1148.399 | 15.03    | 1148.399 | 15.05577 | 1148.398 |
| 1148.4   | 14.94681 | 1148.399 | 15.02655 | 1148.399 | 15.03566 | 1148.399 | 15.06    | 1148.398 |
| 1148.4   | 14.95    | 1148.399 | 15.03    | 1148.399 | 15.04    | 1148.399 | 15.06577 | 1148.398 |
| 1148.4   | 14.95681 | 1148.4   | 15.03655 | 1148.399 | 15.04566 | 1148.399 | 15.07    | 1148.398 |
| 1148.4   | 14.96    | 1148.4   | 15.04    | 1148.399 | 15.05    | 1148.399 | 15.07577 | 1148.398 |
| 1148.4   | 14.96681 | 1148.4   | 15.04655 | 1148.399 | 15.05566 | 1148.399 | 15.08    | 1148.398 |
| 1148.401 | 14.97    | 1148.4   | 15.05    | 1148.399 | 15.06    | 1148.399 | 15.08577 | 1148.398 |
| 1148.401 | 14.97681 | 1148.4   | 15.05655 | 1148.4   | 15.06566 | 1148.399 | 15.09    | 1148.398 |
| 1148.401 | 14.98    | 1148.4   | 15.06    | 1148.4   | 15.07    | 1148.399 | 15.09577 | 1148.398 |
| 1148.401 | 14.98681 | 1148.4   | 15.06655 | 1148.4   | 15.07566 | 1148.399 | 15.1     | 1148.398 |
| 1148.401 | 14.99    | 1148.4   | 15.07    | 1148.4   | 15.08    | 1148.399 | 15.10577 | 1148.398 |
| 1148.401 | 14.99681 | 1148.4   | 15.07655 | 1148.4   | 15.08566 | 1148.399 | 15.11    | 1148.398 |
| 1148.401 | 15       | 1148.4   | 15.08    | 1148.4   | 15.09    | 1148.399 | 15.11577 | 1148.398 |
| 1148.401 | 15.00681 | 1148.4   | 15.08655 | 1148.4   | 15.09566 | 1148.399 | 15.12    | 1148.398 |
| 1148.401 | 15.01    | 1148.4   | 15.09    | 1148.4   | 15.1     | 1148.399 | 15.12577 | 1148.399 |
| 1148.401 | 15.01681 | 1148.4   | 15.09655 | 1148.4   | 15.10566 | 1148.399 | 15.13    | 1148.399 |
| 1148.401 | 15.02    | 1148.4   | 15.1     | 1148.4   | 15.11    | 1148.399 | 15.13577 | 1148.399 |

|          |          |          |          |          |          |          |          |          |
|----------|----------|----------|----------|----------|----------|----------|----------|----------|
| 1148.401 | 15.02681 | 1148.4   | 15.10655 | 1148.4   | 15.11566 | 1148.399 | 15.14    | 1148.399 |
| 1148.401 | 15.03    | 1148.4   | 15.11    | 1148.4   | 15.12    | 1148.399 | 15.14577 | 1148.399 |
| 1148.401 | 15.03681 | 1148.4   | 15.11655 | 1148.4   | 15.12566 | 1148.399 | 15.15    | 1148.399 |
| 1148.401 | 15.04    | 1148.4   | 15.12    | 1148.4   | 15.13    | 1148.399 | 15.15577 | 1148.399 |
| 1148.401 | 15.04681 | 1148.4   | 15.12655 | 1148.4   | 15.13566 | 1148.399 | 15.16    | 1148.399 |
| 1148.401 | 15.05    | 1148.4   | 15.13    | 1148.4   | 15.14    | 1148.399 | 15.16577 | 1148.399 |
| 1148.401 | 15.05681 | 1148.4   | 15.13655 | 1148.4   | 15.14566 | 1148.399 | 15.17    | 1148.399 |
| 1148.401 | 15.06    | 1148.4   | 15.14    | 1148.4   | 15.15    | 1148.399 | 15.17577 | 1148.399 |
| 1148.401 | 15.06681 | 1148.4   | 15.14655 | 1148.4   | 15.15566 | 1148.4   | 15.18    | 1148.399 |
| 1148.401 | 15.07    | 1148.4   | 15.15    | 1148.4   | 15.16    | 1148.4   | 15.18577 | 1148.399 |
| 1148.401 | 15.07681 | 1148.4   | 15.15655 | 1148.4   | 15.16566 | 1148.4   | 15.19    | 1148.399 |
| 1148.401 | 15.08    | 1148.4   | 15.16    | 1148.4   | 15.17    | 1148.4   | 15.19577 | 1148.399 |
| 1148.401 | 15.08681 | 1148.4   | 15.16655 | 1148.4   | 15.17566 | 1148.4   | 15.2     | 1148.399 |
| 1148.401 | 15.09    | 1148.4   | 15.17    | 1148.4   | 15.18    | 1148.4   | 15.20577 | 1148.399 |
| 1148.401 | 15.09681 | 1148.4   | 15.17655 | 1148.4   | 15.18566 | 1148.4   | 15.21    | 1148.399 |
| 1148.401 | 15.1     | 1148.4   | 15.18    | 1148.4   | 15.19    | 1148.4   | 15.21577 | 1148.399 |
| 1148.401 | 15.10681 | 1148.4   | 15.18655 | 1148.4   | 15.19566 | 1148.4   | 15.22    | 1148.399 |
| 1148.401 | 15.11    | 1148.4   | 15.19    | 1148.4   | 15.2     | 1148.4   | 15.22577 | 1148.399 |
| 1148.401 | 15.11681 | 1148.4   | 15.19655 | 1148.4   | 15.20566 | 1148.4   | 15.23    | 1148.399 |
| 1148.401 | 15.12    | 1148.4   | 15.2     | 1148.4   | 15.21    | 1148.4   | 15.23577 | 1148.399 |
| 1148.401 | 15.12681 | 1148.4   | 15.20655 | 1148.4   | 15.21566 | 1148.4   | 15.24    | 1148.399 |
| 1148.401 | 15.13    | 1148.401 | 15.21    | 1148.4   | 15.22    | 1148.4   | 15.24577 | 1148.399 |
| 1148.401 | 15.13681 | 1148.401 | 15.21655 | 1148.4   | 15.22566 | 1148.4   | 15.25    | 1148.399 |
| 1148.401 | 15.14    | 1148.401 | 15.22    | 1148.4   | 15.23    | 1148.4   | 15.25577 | 1148.4   |
| 1148.401 | 15.14681 | 1148.401 | 15.22655 | 1148.4   | 15.23566 | 1148.4   | 15.26    | 1148.4   |
| 1148.401 | 15.15    | 1148.401 | 15.23    | 1148.4   | 15.24    | 1148.4   | 15.26577 | 1148.4   |
| 1148.401 | 15.15681 | 1148.401 | 15.23655 | 1148.401 | 15.24566 | 1148.4   | 15.27    | 1148.4   |
| 1148.401 | 15.16    | 1148.401 | 15.24    | 1148.401 | 15.25    | 1148.4   | 15.27577 | 1148.4   |
| 1148.401 | 15.16681 | 1148.401 | 15.24655 | 1148.401 | 15.25566 | 1148.4   | 15.28    | 1148.4   |
| 1148.401 | 15.17    | 1148.401 | 15.25    | 1148.401 | 15.26    | 1148.4   | 15.28577 | 1148.4   |
| 1148.401 | 15.17681 | 1148.401 | 15.25655 | 1148.401 | 15.26566 | 1148.4   | 15.29    | 1148.4   |
| 1148.401 | 15.18    | 1148.401 | 15.26    | 1148.401 | 15.27    | 1148.4   | 15.29577 | 1148.4   |
| 1148.401 | 15.18681 | 1148.401 | 15.26655 | 1148.401 | 15.27566 | 1148.4   | 15.3     | 1148.4   |
| 1148.401 | 15.19    | 1148.401 | 15.27    | 1148.401 | 15.28    | 1148.4   | 15.30577 | 1148.4   |
| 1148.401 | 15.19681 | 1148.401 | 15.27655 | 1148.401 | 15.28566 | 1148.4   | 15.31    | 1148.4   |
| 1148.401 | 15.2     | 1148.401 | 15.28    | 1148.401 | 15.29    | 1148.4   | 15.31577 | 1148.4   |
| 1148.401 | 15.20681 | 1148.401 | 15.28655 | 1148.401 | 15.29566 | 1148.4   | 15.32    | 1148.4   |
| 1148.401 | 15.21    | 1148.401 | 15.29    | 1148.401 | 15.3     | 1148.4   | 15.32577 | 1148.4   |
| 1148.401 | 15.21681 | 1148.401 | 15.29655 | 1148.401 | 15.30566 | 1148.4   | 15.33    | 1148.4   |
| 1148.401 | 15.22    | 1148.401 | 15.3     | 1148.401 | 15.31    | 1148.4   | 15.33577 | 1148.4   |
| 1148.401 | 15.22681 | 1148.401 | 15.30655 | 1148.401 | 15.31566 | 1148.4   | 15.34    | 1148.4   |
| 1148.401 | 15.23    | 1148.401 | 15.31    | 1148.401 | 15.32    | 1148.4   | 15.34577 | 1148.4   |
| 1148.401 | 15.23681 | 1148.401 | 15.31655 | 1148.401 | 15.32566 | 1148.4   | 15.35    | 1148.4   |
| 1148.402 | 15.24    | 1148.401 | 15.32    | 1148.401 | 15.33    | 1148.4   | 15.35577 | 1148.4   |
| 1148.402 | 15.24681 | 1148.401 | 15.32655 | 1148.401 | 15.33566 | 1148.401 | 15.36    | 1148.4   |
| 1148.402 | 15.25    | 1148.401 | 15.33    | 1148.401 | 15.34    | 1148.401 | 15.36577 | 1148.4   |
| 1148.402 | 15.25681 | 1148.401 | 15.33655 | 1148.401 | 15.34566 | 1148.401 | 15.37    | 1148.4   |

|          |          |          |          |          |          |          |          |          |
|----------|----------|----------|----------|----------|----------|----------|----------|----------|
| 1148.402 | 15.26    | 1148.401 | 15.34    | 1148.401 | 15.35    | 1148.401 | 15.37577 | 1148.4   |
| 1148.402 | 15.26681 | 1148.401 | 15.34655 | 1148.401 | 15.35566 | 1148.401 | 15.38    | 1148.4   |
| 1148.402 | 15.27    | 1148.401 | 15.35    | 1148.401 | 15.36    | 1148.401 | 15.38577 | 1148.4   |
| 1148.402 | 15.27681 | 1148.401 | 15.35655 | 1148.401 | 15.36566 | 1148.401 | 15.39    | 1148.4   |
| 1148.402 | 15.28    | 1148.401 | 15.36    | 1148.401 | 15.37    | 1148.401 | 15.39577 | 1148.4   |
| 1148.402 | 15.28681 | 1148.401 | 15.36655 | 1148.401 | 15.37566 | 1148.401 | 15.4     | 1148.4   |
| 1148.402 | 15.29    | 1148.401 | 15.37    | 1148.401 | 15.38    | 1148.401 | 15.40577 | 1148.4   |
| 1148.402 | 15.29681 | 1148.401 | 15.37655 | 1148.401 | 15.38566 | 1148.401 | 15.41    | 1148.4   |
| 1148.402 | 15.3     | 1148.401 | 15.38    | 1148.401 | 15.39    | 1148.401 | 15.41577 | 1148.4   |
| 1148.402 | 15.30681 | 1148.401 | 15.38655 | 1148.401 | 15.39566 | 1148.401 | 15.42    | 1148.4   |
| 1148.402 | 15.31    | 1148.401 | 15.39    | 1148.401 | 15.4     | 1148.401 | 15.42577 | 1148.4   |
| 1148.402 | 15.31681 | 1148.401 | 15.39655 | 1148.401 | 15.40566 | 1148.401 | 15.43    | 1148.4   |
| 1148.402 | 15.32    | 1148.401 | 15.4     | 1148.401 | 15.41    | 1148.401 | 15.43577 | 1148.401 |
| 1148.402 | 15.32681 | 1148.401 | 15.40655 | 1148.401 | 15.41566 | 1148.401 | 15.44    | 1148.401 |
| 1148.402 | 15.33    | 1148.401 | 15.41    | 1148.401 | 15.42    | 1148.401 | 15.44577 | 1148.401 |
| 1148.402 | 15.33681 | 1148.401 | 15.41655 | 1148.401 | 15.42566 | 1148.401 | 15.45    | 1148.401 |
| 1148.402 | 15.34    | 1148.401 | 15.42    | 1148.401 | 15.43    | 1148.401 | 15.45577 | 1148.401 |
| 1148.402 | 15.34681 | 1148.401 | 15.42655 | 1148.401 | 15.43566 | 1148.401 | 15.46    | 1148.401 |
| 1148.402 | 15.35    | 1148.401 | 15.43    | 1148.401 | 15.44    | 1148.401 | 15.46577 | 1148.401 |
| 1148.402 | 15.35681 | 1148.401 | 15.43655 | 1148.401 | 15.44566 | 1148.401 | 15.47    | 1148.401 |
| 1148.402 | 15.36    | 1148.401 | 15.44    | 1148.401 | 15.45    | 1148.401 | 15.47577 | 1148.401 |
| 1148.402 | 15.36681 | 1148.401 | 15.44655 | 1148.401 | 15.45566 | 1148.401 | 15.48    | 1148.401 |
| 1148.402 | 15.37    | 1148.401 | 15.45    | 1148.401 | 15.46    | 1148.401 | 15.48577 | 1148.401 |
| 1148.402 | 15.37681 | 1148.401 | 15.45655 | 1148.401 | 15.46566 | 1148.401 | 15.49    | 1148.401 |
| 1148.402 | 15.38    | 1148.401 | 15.46    | 1148.401 | 15.47    | 1148.401 | 15.49577 | 1148.401 |
| 1148.402 | 15.38681 | 1148.401 | 15.46655 | 1148.401 | 15.47566 | 1148.401 | 15.5     | 1148.401 |
| 1148.402 | 15.39    | 1148.401 | 15.47    | 1148.401 | 15.48    | 1148.401 | 15.50577 | 1148.401 |
| 1148.402 | 15.39681 | 1148.401 | 15.47655 | 1148.401 | 15.48566 | 1148.401 | 15.51    | 1148.401 |
| 1148.402 | 15.4     | 1148.401 | 15.48    | 1148.401 | 15.49    | 1148.401 | 15.51577 | 1148.401 |
| 1148.402 | 15.40681 | 1148.402 | 15.48655 | 1148.401 | 15.49566 | 1148.401 | 15.52    | 1148.401 |
| 1148.402 | 15.41    | 1148.402 | 15.49    | 1148.401 | 15.5     | 1148.401 | 15.52577 | 1148.401 |
| 1148.402 | 15.41681 | 1148.402 | 15.49655 | 1148.401 | 15.50566 | 1148.401 | 15.53    | 1148.401 |
| 1148.402 | 15.42    | 1148.402 | 15.5     | 1148.401 | 15.51    | 1148.401 | 15.53577 | 1148.401 |
| 1148.402 | 15.42681 | 1148.402 | 15.50655 | 1148.402 | 15.51566 | 1148.401 | 15.54    | 1148.401 |
| 1148.402 | 15.43    | 1148.402 | 15.51    | 1148.402 | 15.52    | 1148.401 | 15.54577 | 1148.401 |
| 1148.402 | 15.43681 | 1148.402 | 15.51655 | 1148.402 | 15.52566 | 1148.401 | 15.55    | 1148.401 |
| 1148.402 | 15.44    | 1148.402 | 15.52    | 1148.402 | 15.53    | 1148.401 | 15.55577 | 1148.401 |
| 1148.402 | 15.44681 | 1148.402 | 15.52655 | 1148.402 | 15.53566 | 1148.401 | 15.56    | 1148.401 |
| 1148.402 | 15.45    | 1148.402 | 15.53    | 1148.402 | 15.54    | 1148.401 | 15.56577 | 1148.401 |
| 1148.402 | 15.45681 | 1148.402 | 15.53655 | 1148.402 | 15.54566 | 1148.401 | 15.57    | 1148.401 |
| 1148.402 | 15.46    | 1148.402 | 15.54    | 1148.402 | 15.55    | 1148.401 | 15.57577 | 1148.401 |
| 1148.402 | 15.46681 | 1148.402 | 15.54655 | 1148.402 | 15.55566 | 1148.401 | 15.58    | 1148.401 |
| 1148.402 | 15.47    | 1148.402 | 15.55    | 1148.402 | 15.56    | 1148.401 | 15.58577 | 1148.401 |
| 1148.402 | 15.47681 | 1148.402 | 15.55655 | 1148.402 | 15.56566 | 1148.401 | 15.59    | 1148.401 |
| 1148.402 | 15.48    | 1148.402 | 15.56    | 1148.402 | 15.57    | 1148.401 | 15.59577 | 1148.401 |
| 1148.402 | 15.48681 | 1148.402 | 15.56655 | 1148.402 | 15.57566 | 1148.401 | 15.6     | 1148.401 |
| 1148.402 | 15.49    | 1148.402 | 15.57    | 1148.402 | 15.58    | 1148.401 | 15.60577 | 1148.401 |

|          |          |          |          |          |          |          |          |          |
|----------|----------|----------|----------|----------|----------|----------|----------|----------|
| 1148.402 | 15.49681 | 1148.402 | 15.57655 | 1148.402 | 15.58566 | 1148.401 | 15.61    | 1148.401 |
| 1148.402 | 15.5     | 1148.402 | 15.58    | 1148.402 | 15.59    | 1148.401 | 15.61577 | 1148.401 |
| 1148.402 | 15.50681 | 1148.402 | 15.58655 | 1148.402 | 15.59566 | 1148.401 | 15.62    | 1148.401 |
| 1148.402 | 15.51    | 1148.402 | 15.59    | 1148.402 | 15.6     | 1148.401 | 15.62577 | 1148.401 |
| 1148.402 | 15.51681 | 1148.402 | 15.59655 | 1148.402 | 15.60566 | 1148.402 | 15.63    | 1148.401 |
| 1148.402 | 15.52    | 1148.402 | 15.6     | 1148.402 | 15.61    | 1148.402 | 15.63577 | 1148.401 |
| 1148.402 | 15.52681 | 1148.402 | 15.60655 | 1148.402 | 15.61566 | 1148.402 | 15.64    | 1148.401 |
| 1148.402 | 15.53    | 1148.402 | 15.61    | 1148.402 | 15.62    | 1148.402 | 15.64577 | 1148.401 |
| 1148.402 | 15.53681 | 1148.402 | 15.61655 | 1148.402 | 15.62566 | 1148.402 | 15.65    | 1148.401 |
| 1148.402 | 15.54    | 1148.402 | 15.62    | 1148.402 | 15.63    | 1148.402 | 15.65577 | 1148.401 |
| 1148.402 | 15.54681 | 1148.402 | 15.62655 | 1148.402 | 15.63566 | 1148.402 | 15.66    | 1148.401 |
| 1148.402 | 15.55    | 1148.402 | 15.63    | 1148.402 | 15.64    | 1148.402 | 15.66577 | 1148.401 |
| 1148.402 | 15.55681 | 1148.402 | 15.63655 | 1148.402 | 15.64566 | 1148.402 | 15.67    | 1148.401 |
| 1148.402 | 15.56    | 1148.402 | 15.64    | 1148.402 | 15.65    | 1148.402 | 15.67577 | 1148.401 |
| 1148.402 | 15.56681 | 1148.402 | 15.64655 | 1148.402 | 15.65566 | 1148.402 | 15.68    | 1148.401 |
| 1148.402 | 15.57    | 1148.402 | 15.65    | 1148.402 | 15.66    | 1148.402 | 15.68577 | 1148.401 |
| 1148.402 | 15.57681 | 1148.402 | 15.65655 | 1148.402 | 15.66566 | 1148.402 | 15.69    | 1148.401 |
| 1148.402 | 15.58    | 1148.402 | 15.66    | 1148.402 | 15.67    | 1148.402 | 15.69577 | 1148.401 |
| 1148.402 | 15.58681 | 1148.402 | 15.66655 | 1148.402 | 15.67566 | 1148.402 | 15.7     | 1148.401 |
| 1148.402 | 15.59    | 1148.402 | 15.67    | 1148.402 | 15.68    | 1148.402 | 15.70577 | 1148.402 |
| 1148.402 | 15.59681 | 1148.402 | 15.67655 | 1148.402 | 15.68566 | 1148.402 | 15.71    | 1148.402 |
| 1148.402 | 15.6     | 1148.402 | 15.68    | 1148.402 | 15.69    | 1148.402 | 15.71577 | 1148.402 |
| 1148.402 | 15.60681 | 1148.402 | 15.68655 | 1148.402 | 15.69566 | 1148.402 | 15.72    | 1148.402 |
| 1148.402 | 15.61    | 1148.402 | 15.69    | 1148.402 | 15.7     | 1148.402 | 15.72577 | 1148.402 |
| 1148.402 | 15.61681 | 1148.402 | 15.69655 | 1148.402 | 15.70566 | 1148.402 | 15.73    | 1148.402 |
| 1148.402 | 15.62    | 1148.402 | 15.7     | 1148.402 | 15.71    | 1148.402 | 15.73577 | 1148.402 |
| 1148.402 | 15.62681 | 1148.402 | 15.70655 | 1148.402 | 15.71566 | 1148.402 | 15.74    | 1148.402 |
| 1148.402 | 15.63    | 1148.402 | 15.71    | 1148.402 | 15.72    | 1148.402 | 15.74577 | 1148.402 |
| 1148.402 | 15.63681 | 1148.402 | 15.71655 | 1148.402 | 15.72566 | 1148.402 | 15.75    | 1148.402 |
| 1148.402 | 15.64    | 1148.402 | 15.72    | 1148.402 | 15.73    | 1148.402 | 15.75577 | 1148.402 |
| 1148.402 | 15.64681 | 1148.402 | 15.72655 | 1148.402 | 15.73566 | 1148.402 | 15.76    | 1148.402 |
| 1148.402 | 15.65    | 1148.402 | 15.73    | 1148.402 | 15.74    | 1148.402 | 15.76577 | 1148.402 |
| 1148.402 | 15.65681 | 1148.402 | 15.73655 | 1148.402 | 15.74566 | 1148.402 | 15.77    | 1148.402 |
| 1148.402 | 15.66    | 1148.402 | 15.74    | 1148.402 | 15.75    | 1148.402 | 15.77577 | 1148.402 |
| 1148.402 | 15.66681 | 1148.402 | 15.74655 | 1148.402 | 15.75566 | 1148.402 | 15.78    | 1148.402 |
| 1148.402 | 15.67    | 1148.402 | 15.75    | 1148.402 | 15.76    | 1148.402 | 15.78577 | 1148.402 |
| 1148.402 | 15.67681 | 1148.402 | 15.75655 | 1148.402 | 15.76566 | 1148.402 | 15.79    | 1148.402 |
| 1148.402 | 15.68    | 1148.402 | 15.76    | 1148.402 | 15.77    | 1148.402 | 15.79577 | 1148.402 |
| 1148.402 | 15.68681 | 1148.402 | 15.76655 | 1148.402 | 15.77566 | 1148.402 | 15.8     | 1148.402 |
| 1148.402 | 15.69    | 1148.402 | 15.77    | 1148.402 | 15.78    | 1148.402 | 15.80577 | 1148.402 |
| 1148.402 | 15.69681 | 1148.402 | 15.77655 | 1148.402 | 15.78566 | 1148.402 | 15.81    | 1148.402 |
| 1148.402 | 15.7     | 1148.402 | 15.78    | 1148.402 | 15.79    | 1148.402 | 15.81577 | 1148.402 |
| 1148.402 | 15.70681 | 1148.402 | 15.78655 | 1148.402 | 15.79566 | 1148.402 | 15.82    | 1148.402 |
| 1148.402 | 15.71    | 1148.402 | 15.79    | 1148.402 | 15.8     | 1148.402 | 15.82577 | 1148.402 |
| 1148.402 | 15.71681 | 1148.402 | 15.79655 | 1148.402 | 15.80566 | 1148.402 | 15.83    | 1148.402 |
| 1148.402 | 15.72    | 1148.402 | 15.8     | 1148.402 | 15.81    | 1148.402 | 15.83577 | 1148.402 |
| 1148.402 | 15.72681 | 1148.402 | 15.80655 | 1148.402 | 15.81566 | 1148.402 | 15.84    | 1148.402 |

|          |          |          |          |          |          |          |          |          |
|----------|----------|----------|----------|----------|----------|----------|----------|----------|
| 1148.402 | 15.73    | 1148.402 | 15.81    | 1148.402 | 15.82    | 1148.402 | 15.84577 | 1148.402 |
| 1148.402 | 15.73681 | 1148.402 | 15.81655 | 1148.402 | 15.82566 | 1148.402 | 15.85    | 1148.402 |
| 1148.402 | 15.74    | 1148.402 | 15.82    | 1148.402 | 15.83    | 1148.402 | 15.85577 | 1148.402 |
| 1148.402 | 15.74681 | 1148.402 | 15.82655 | 1148.402 | 15.83566 | 1148.402 | 15.86    | 1148.402 |
| 1148.402 | 15.75    | 1148.402 | 15.83    | 1148.402 | 15.84    | 1148.402 | 15.86577 | 1148.402 |
| 1148.402 | 15.75681 | 1148.402 | 15.83655 | 1148.402 | 15.84566 | 1148.402 | 15.87    | 1148.402 |
| 1148.402 | 15.76    | 1148.402 | 15.84    | 1148.402 | 15.85    | 1148.402 | 15.87577 | 1148.402 |
| 1148.402 | 15.76681 | 1148.402 | 15.84655 | 1148.402 | 15.85566 | 1148.402 | 15.88    | 1148.402 |
| 1148.402 | 15.77    | 1148.402 | 15.85    | 1148.402 | 15.86    | 1148.402 | 15.88577 | 1148.402 |
| 1148.402 | 15.77681 | 1148.402 | 15.85655 | 1148.402 | 15.86566 | 1148.402 | 15.89    | 1148.402 |
| 1148.402 | 15.78    | 1148.402 | 15.86    | 1148.402 | 15.87    | 1148.402 | 15.89577 | 1148.402 |
| 1148.402 | 15.78681 | 1148.402 | 15.86655 | 1148.402 | 15.87566 | 1148.402 | 15.9     | 1148.402 |
| 1148.402 | 15.79    | 1148.402 | 15.87    | 1148.402 | 15.88    | 1148.402 | 15.90577 | 1148.402 |
| 1148.402 | 15.79681 | 1148.402 | 15.87655 | 1148.402 | 15.88566 | 1148.402 | 15.91    | 1148.402 |
| 1148.402 | 15.8     | 1148.402 | 15.88    | 1148.402 | 15.89    | 1148.402 | 15.91577 | 1148.402 |
| 1148.402 | 15.80681 | 1148.402 | 15.88655 | 1148.402 | 15.89566 | 1148.402 | 15.92    | 1148.402 |
| 1148.402 | 15.81    | 1148.402 | 15.89    | 1148.402 | 15.9     | 1148.402 | 15.92577 | 1148.402 |
| 1148.402 | 15.81681 | 1148.402 | 15.89655 | 1148.402 | 15.90566 | 1148.402 | 15.93    | 1148.402 |
| 1148.402 | 15.82    | 1148.402 | 15.9     | 1148.402 | 15.91    | 1148.402 | 15.93577 | 1148.402 |
| 1148.402 | 15.82681 | 1148.402 | 15.90655 | 1148.402 | 15.91566 | 1148.402 | 15.94    | 1148.402 |
| 1148.402 | 15.83    | 1148.402 | 15.91    | 1148.402 | 15.92    | 1148.402 | 15.94577 | 1148.402 |
| 1148.402 | 15.83681 | 1148.402 | 15.91655 | 1148.402 | 15.92566 | 1148.402 | 15.95    | 1148.402 |
| 1148.402 | 15.84    | 1148.402 | 15.92    | 1148.402 | 15.93    | 1148.402 | 15.95577 | 1148.402 |
| 1148.403 | 15.84681 | 1148.402 | 15.92655 | 1148.402 | 15.93566 | 1148.402 | 15.96    | 1148.402 |
| 1148.403 | 15.85    | 1148.402 | 15.93    | 1148.402 | 15.94    | 1148.402 | 15.96577 | 1148.402 |
| 1148.403 | 15.85681 | 1148.402 | 15.93655 | 1148.402 | 15.94566 | 1148.402 | 15.97    | 1148.402 |
| 1148.403 | 15.86    | 1148.402 | 15.94    | 1148.402 | 15.95    | 1148.402 | 15.97577 | 1148.402 |
| 1148.403 | 15.86681 | 1148.402 | 15.94655 | 1148.402 | 15.95566 | 1148.402 | 15.98    | 1148.402 |
| 1148.403 | 15.87    | 1148.402 | 15.95    | 1148.402 | 15.96    | 1148.402 | 15.98577 | 1148.402 |
| 1148.403 | 15.87681 | 1148.402 | 15.95655 | 1148.402 | 15.96566 | 1148.402 | 15.99    | 1148.402 |
| 1148.403 | 15.88    | 1148.402 | 15.96    | 1148.402 | 15.97    | 1148.402 | 15.99577 | 1148.402 |
| 1148.403 | 15.88681 | 1148.402 | 15.96655 | 1148.402 | 15.97566 | 1148.402 | 16       | 1148.402 |
| 1148.403 | 15.89    | 1148.402 | 15.97    | 1148.402 | 15.98    | 1148.402 | 16.00577 | 1148.402 |
| 1148.403 | 15.89681 | 1148.402 | 15.97655 | 1148.402 | 15.98566 | 1148.402 | 16.01    | 1148.402 |
| 1148.403 | 15.9     | 1148.402 | 15.98    | 1148.402 | 15.99    | 1148.402 | 16.01577 | 1148.402 |
| 1148.403 | 15.90681 | 1148.402 | 15.98655 | 1148.402 | 15.99566 | 1148.402 | 16.02    | 1148.402 |
| 1148.403 | 15.91    | 1148.402 | 15.99    | 1148.402 | 16       | 1148.402 | 16.02577 | 1148.402 |
| 1148.403 | 15.91681 | 1148.402 | 15.99655 | 1148.402 | 16.00566 | 1148.402 | 16.03    | 1148.402 |
| 1148.403 | 15.92    | 1148.402 | 16       | 1148.402 | 16.01    | 1148.402 | 16.03577 | 1148.402 |
| 1148.403 | 15.92681 | 1148.402 | 16.00655 | 1148.402 | 16.01566 | 1148.402 | 16.04    | 1148.402 |
| 1148.403 | 15.93    | 1148.402 | 16.01    | 1148.402 | 16.02    | 1148.402 | 16.04577 | 1148.402 |
| 1148.403 | 15.93681 | 1148.402 | 16.01655 | 1148.402 | 16.02566 | 1148.402 | 16.05    | 1148.402 |
| 1148.403 | 15.94    | 1148.402 | 16.02    | 1148.402 | 16.03    | 1148.402 | 16.05577 | 1148.402 |
| 1148.403 | 15.94681 | 1148.402 | 16.02655 | 1148.402 | 16.03566 | 1148.402 | 16.06    | 1148.402 |
| 1148.403 | 15.95    | 1148.402 | 16.03    | 1148.402 | 16.04    | 1148.402 | 16.06577 | 1148.402 |
| 1148.403 | 15.95681 | 1148.402 | 16.03655 | 1148.402 | 16.04566 | 1148.402 | 16.07    | 1148.402 |
| 1148.403 | 15.96    | 1148.402 | 16.04    | 1148.402 | 16.05    | 1148.402 | 16.07577 | 1148.402 |

|          |          |          |          |          |          |          |          |          |
|----------|----------|----------|----------|----------|----------|----------|----------|----------|
| 1148.403 | 15.96681 | 1148.402 | 16.04655 | 1148.402 | 16.05566 | 1148.402 | 16.08    | 1148.402 |
| 1148.403 | 15.97    | 1148.402 | 16.05    | 1148.402 | 16.06    | 1148.402 | 16.08577 | 1148.402 |
| 1148.403 | 15.97681 | 1148.402 | 16.05655 | 1148.402 | 16.06566 | 1148.402 | 16.09    | 1148.402 |
| 1148.403 | 15.98    | 1148.402 | 16.06    | 1148.402 | 16.07    | 1148.402 | 16.09577 | 1148.402 |
| 1148.403 | 15.98681 | 1148.402 | 16.06655 | 1148.402 | 16.07566 | 1148.402 | 16.1     | 1148.402 |
| 1148.403 | 15.99    | 1148.402 | 16.07    | 1148.402 | 16.08    | 1148.402 | 16.10577 | 1148.402 |
| 1148.403 | 15.99681 | 1148.402 | 16.07655 | 1148.402 | 16.08566 | 1148.402 | 16.11    | 1148.402 |
| 1148.403 | 16       | 1148.402 | 16.08    | 1148.402 | 16.09    | 1148.402 | 16.11577 | 1148.402 |
| 1148.403 | 16.00681 | 1148.403 | 16.08655 | 1148.402 | 16.09566 | 1148.402 | 16.12    | 1148.402 |
| 1148.403 | 16.01    | 1148.403 | 16.09    | 1148.402 | 16.1     | 1148.402 | 16.12577 | 1148.402 |
| 1148.403 | 16.01681 | 1148.403 | 16.09655 | 1148.402 | 16.10566 | 1148.402 | 16.13    | 1148.402 |
| 1148.403 | 16.02    | 1148.403 | 16.1     | 1148.402 | 16.11    | 1148.402 | 16.13577 | 1148.402 |
| 1148.403 | 16.02681 | 1148.403 | 16.10655 | 1148.403 | 16.11566 | 1148.402 | 16.14    | 1148.402 |
| 1148.403 | 16.03    | 1148.403 | 16.11    | 1148.403 | 16.12    | 1148.402 | 16.14577 | 1148.402 |
| 1148.403 | 16.03681 | 1148.403 | 16.11655 | 1148.403 | 16.12566 | 1148.402 | 16.15    | 1148.402 |
| 1148.403 | 16.04    | 1148.403 | 16.12    | 1148.403 | 16.13    | 1148.402 | 16.15577 | 1148.402 |
| 1148.403 | 16.04681 | 1148.403 | 16.12655 | 1148.403 | 16.13566 | 1148.402 | 16.16    | 1148.402 |
| 1148.403 | 16.05    | 1148.403 | 16.13    | 1148.403 | 16.14    | 1148.402 | 16.16577 | 1148.402 |
| 1148.403 | 16.05681 | 1148.403 | 16.13655 | 1148.403 | 16.14566 | 1148.402 | 16.17    | 1148.402 |
| 1148.403 | 16.06    | 1148.403 | 16.14    | 1148.403 | 16.15    | 1148.402 | 16.17577 | 1148.402 |
| 1148.403 | 16.06681 | 1148.403 | 16.14655 | 1148.403 | 16.15566 | 1148.402 | 16.18    | 1148.402 |
| 1148.403 | 16.07    | 1148.403 | 16.15    | 1148.403 | 16.16    | 1148.402 | 16.18577 | 1148.402 |
| 1148.403 | 16.07681 | 1148.403 | 16.15655 | 1148.403 | 16.16566 | 1148.402 | 16.19    | 1148.402 |
| 1148.403 | 16.08    | 1148.403 | 16.16    | 1148.403 | 16.17    | 1148.402 | 16.19577 | 1148.402 |
| 1148.403 | 16.08681 | 1148.403 | 16.16655 | 1148.403 | 16.17566 | 1148.402 | 16.2     | 1148.402 |
| 1148.403 | 16.09    | 1148.403 | 16.17    | 1148.403 | 16.18    | 1148.402 | 16.20577 | 1148.402 |
| 1148.403 | 16.09681 | 1148.403 | 16.17655 | 1148.403 | 16.18566 | 1148.402 | 16.21    | 1148.402 |
| 1148.403 | 16.1     | 1148.403 | 16.18    | 1148.403 | 16.19    | 1148.402 | 16.21577 | 1148.402 |
| 1148.403 | 16.10681 | 1148.403 | 16.18655 | 1148.403 | 16.19566 | 1148.402 | 16.22    | 1148.402 |
| 1148.403 | 16.11    | 1148.403 | 16.19    | 1148.403 | 16.2     | 1148.402 | 16.22577 | 1148.402 |
| 1148.403 | 16.11681 | 1148.403 | 16.19655 | 1148.403 | 16.20566 | 1148.402 | 16.23    | 1148.402 |
| 1148.403 | 16.12    | 1148.403 | 16.2     | 1148.403 | 16.21    | 1148.403 | 16.23577 | 1148.402 |
| 1148.403 | 16.12681 | 1148.403 | 16.20655 | 1148.403 | 16.21566 | 1148.403 | 16.24    | 1148.402 |
| 1148.403 | 16.13    | 1148.403 | 16.21    | 1148.403 | 16.22    | 1148.403 | 16.24577 | 1148.402 |
| 1148.403 | 16.13681 | 1148.403 | 16.21655 | 1148.403 | 16.22566 | 1148.403 | 16.25    | 1148.402 |
| 1148.403 | 16.14    | 1148.403 | 16.22    | 1148.403 | 16.23    | 1148.403 | 16.25577 | 1148.402 |
| 1148.403 | 16.14681 | 1148.403 | 16.22655 | 1148.403 | 16.23566 | 1148.403 | 16.26    | 1148.402 |
| 1148.403 | 16.15    | 1148.403 | 16.23    | 1148.403 | 16.24    | 1148.403 | 16.26577 | 1148.402 |
| 1148.403 | 16.15681 | 1148.403 | 16.23655 | 1148.403 | 16.24566 | 1148.403 | 16.27    | 1148.402 |
| 1148.403 | 16.16    | 1148.403 | 16.24    | 1148.403 | 16.25    | 1148.403 | 16.27577 | 1148.402 |
| 1148.403 | 16.16681 | 1148.403 | 16.24655 | 1148.403 | 16.25566 | 1148.403 | 16.28    | 1148.402 |
| 1148.403 | 16.17    | 1148.403 | 16.25    | 1148.403 | 16.26    | 1148.403 | 16.28577 | 1148.402 |
| 1148.403 | 16.17681 | 1148.403 | 16.25655 | 1148.403 | 16.26566 | 1148.403 | 16.29    | 1148.402 |
| 1148.403 | 16.18    | 1148.403 | 16.26    | 1148.403 | 16.27    | 1148.403 | 16.29577 | 1148.402 |
| 1148.403 | 16.18681 | 1148.403 | 16.26655 | 1148.403 | 16.27566 | 1148.403 | 16.3     | 1148.402 |
| 1148.403 | 16.19    | 1148.403 | 16.27    | 1148.403 | 16.28    | 1148.403 | 16.30577 | 1148.402 |
| 1148.403 | 16.19681 | 1148.403 | 16.27655 | 1148.403 | 16.28566 | 1148.403 | 16.31    | 1148.403 |

|          |          |          |          |          |          |          |          |          |
|----------|----------|----------|----------|----------|----------|----------|----------|----------|
| 1148.403 | 16.2     | 1148.403 | 16.28    | 1148.403 | 16.29    | 1148.403 | 16.31577 | 1148.403 |
| 1148.403 | 16.20681 | 1148.403 | 16.28655 | 1148.403 | 16.29566 | 1148.403 | 16.32    | 1148.403 |
| 1148.403 | 16.21    | 1148.403 | 16.29    | 1148.403 | 16.3     | 1148.403 | 16.32577 | 1148.403 |
| 1148.403 | 16.21681 | 1148.403 | 16.29655 | 1148.403 | 16.30566 | 1148.403 | 16.33    | 1148.403 |
| 1148.403 | 16.22    | 1148.403 | 16.3     | 1148.403 | 16.31    | 1148.403 | 16.33577 | 1148.403 |
| 1148.403 | 16.22681 | 1148.403 | 16.30655 | 1148.403 | 16.31566 | 1148.403 | 16.34    | 1148.403 |
| 1148.403 | 16.23    | 1148.403 | 16.31    | 1148.403 | 16.32    | 1148.403 | 16.34577 | 1148.403 |
| 1148.403 | 16.23681 | 1148.403 | 16.31655 | 1148.403 | 16.32566 | 1148.403 | 16.35    | 1148.403 |
| 1148.403 | 16.24    | 1148.403 | 16.32    | 1148.403 | 16.33    | 1148.403 | 16.35577 | 1148.403 |
| 1148.403 | 16.24681 | 1148.403 | 16.32655 | 1148.403 | 16.33566 | 1148.403 | 16.36    | 1148.403 |
| 1148.403 | 16.25    | 1148.403 | 16.33    | 1148.403 | 16.34    | 1148.403 | 16.36577 | 1148.403 |
| 1148.403 | 16.25681 | 1148.403 | 16.33655 | 1148.403 | 16.34566 | 1148.403 | 16.37    | 1148.403 |
| 1148.403 | 16.26    | 1148.403 | 16.34    | 1148.403 | 16.35    | 1148.403 | 16.37577 | 1148.403 |
| 1148.403 | 16.26681 | 1148.403 | 16.34655 | 1148.403 | 16.35566 | 1148.403 | 16.38    | 1148.403 |
| 1148.403 | 16.27    | 1148.403 | 16.35    | 1148.403 | 16.36    | 1148.403 | 16.38577 | 1148.403 |
| 1148.403 | 16.27681 | 1148.403 | 16.35655 | 1148.403 | 16.36566 | 1148.403 | 16.39    | 1148.403 |
| 1148.403 | 16.28    | 1148.403 | 16.36    | 1148.403 | 16.37    | 1148.403 | 16.39577 | 1148.403 |
| 1148.403 | 16.28681 | 1148.403 | 16.36655 | 1148.403 | 16.37566 | 1148.403 | 16.4     | 1148.403 |
| 1148.403 | 16.29    | 1148.403 | 16.37    | 1148.403 | 16.38    | 1148.403 | 16.40577 | 1148.403 |
| 1148.403 | 16.29681 | 1148.403 | 16.37655 | 1148.403 | 16.38566 | 1148.403 | 16.41    | 1148.403 |
| 1148.403 | 16.3     | 1148.403 | 16.38    | 1148.403 | 16.39    | 1148.403 | 16.41577 | 1148.403 |
| 1148.403 | 16.30681 | 1148.403 | 16.38655 | 1148.403 | 16.39566 | 1148.403 | 16.42    | 1148.403 |
| 1148.403 | 16.31    | 1148.403 | 16.39    | 1148.403 | 16.4     | 1148.403 | 16.42577 | 1148.403 |
| 1148.403 | 16.31681 | 1148.403 | 16.39655 | 1148.403 | 16.40566 | 1148.403 | 16.43    | 1148.403 |
| 1148.403 | 16.32    | 1148.403 | 16.4     | 1148.403 | 16.41    | 1148.403 | 16.43577 | 1148.403 |
| 1148.403 | 16.32681 | 1148.403 | 16.40655 | 1148.403 | 16.41566 | 1148.403 | 16.44    | 1148.403 |
| 1148.403 | 16.33    | 1148.403 | 16.41    | 1148.403 | 16.42    | 1148.403 | 16.44577 | 1148.403 |
| 1148.403 | 16.33681 | 1148.403 | 16.41655 | 1148.403 | 16.42566 | 1148.403 | 16.45    | 1148.403 |
| 1148.403 | 16.34    | 1148.403 | 16.42    | 1148.403 | 16.43    | 1148.403 | 16.45577 | 1148.403 |
| 1148.403 | 16.34681 | 1148.403 | 16.42655 | 1148.403 | 16.43566 | 1148.403 | 16.46    | 1148.403 |
| 1148.403 | 16.35    | 1148.403 | 16.43    | 1148.403 | 16.44    | 1148.403 | 16.46577 | 1148.403 |
| 1148.403 | 16.35681 | 1148.403 | 16.43655 | 1148.403 | 16.44566 | 1148.403 | 16.47    | 1148.403 |
| 1148.403 | 16.36    | 1148.403 | 16.44    | 1148.403 | 16.45    | 1148.403 | 16.47577 | 1148.403 |
| 1148.403 | 16.36681 | 1148.403 | 16.44655 | 1148.403 | 16.45566 | 1148.403 | 16.48    | 1148.403 |
| 1148.403 | 16.37    | 1148.403 | 16.45    | 1148.403 | 16.46    | 1148.403 | 16.48577 | 1148.403 |
| 1148.403 | 16.37681 | 1148.403 | 16.45655 | 1148.403 | 16.46566 | 1148.403 | 16.49    | 1148.403 |
| 1148.403 | 16.38    | 1148.403 | 16.46    | 1148.403 | 16.47    | 1148.403 | 16.49577 | 1148.403 |
| 1148.403 | 16.38681 | 1148.403 | 16.46655 | 1148.403 | 16.47566 | 1148.403 | 16.5     | 1148.403 |
| 1148.403 | 16.39    | 1148.403 | 16.47    | 1148.403 | 16.48    | 1148.403 | 16.50577 | 1148.403 |
| 1148.403 | 16.39681 | 1148.403 | 16.47655 | 1148.403 | 16.48566 | 1148.403 | 16.51    | 1148.403 |
| 1148.403 | 16.4     | 1148.403 | 16.48    | 1148.403 | 16.49    | 1148.403 | 16.51577 | 1148.403 |
| 1148.403 | 16.40681 | 1148.403 | 16.48655 | 1148.403 | 16.49566 | 1148.403 | 16.52    | 1148.403 |
| 1148.403 | 16.41    | 1148.403 | 16.49    | 1148.403 | 16.5     | 1148.403 | 16.52577 | 1148.403 |
| 1148.403 | 16.41681 | 1148.403 | 16.49655 | 1148.403 | 16.50566 | 1148.403 | 16.53    | 1148.403 |
| 1148.403 | 16.42    | 1148.403 | 16.5     | 1148.403 | 16.51    | 1148.403 | 16.53577 | 1148.403 |
| 1148.403 | 16.42681 | 1148.403 | 16.50655 | 1148.403 | 16.51566 | 1148.403 | 16.54    | 1148.403 |
| 1148.403 | 16.43    | 1148.403 | 16.51    | 1148.403 | 16.52    | 1148.403 | 16.54577 | 1148.403 |

|          |          |          |          |          |          |          |          |          |
|----------|----------|----------|----------|----------|----------|----------|----------|----------|
| 1148.403 | 16.43681 | 1148.403 | 16.51655 | 1148.403 | 16.52566 | 1148.403 | 16.55    | 1148.403 |
| 1148.403 | 16.44    | 1148.403 | 16.52    | 1148.403 | 16.53    | 1148.403 | 16.55577 | 1148.403 |
| 1148.403 | 16.44681 | 1148.403 | 16.52655 | 1148.403 | 16.53566 | 1148.403 | 16.56    | 1148.403 |
| 1148.403 | 16.45    | 1148.403 | 16.53    | 1148.403 | 16.54    | 1148.403 | 16.56577 | 1148.403 |
| 1148.403 | 16.45681 | 1148.403 | 16.53655 | 1148.403 | 16.54566 | 1148.403 | 16.57    | 1148.403 |
| 1148.403 | 16.46    | 1148.403 | 16.54    | 1148.403 | 16.55    | 1148.403 | 16.57577 | 1148.403 |
| 1148.403 | 16.46681 | 1148.403 | 16.54655 | 1148.403 | 16.55566 | 1148.403 | 16.58    | 1148.403 |
| 1148.403 | 16.47    | 1148.403 | 16.55    | 1148.403 | 16.56    | 1148.403 | 16.58577 | 1148.403 |
| 1148.403 | 16.47681 | 1148.403 | 16.55655 | 1148.403 | 16.56566 | 1148.403 | 16.59    | 1148.403 |
| 1148.403 | 16.48    | 1148.403 | 16.56    | 1148.403 | 16.57    | 1148.403 | 16.59577 | 1148.403 |
| 1148.403 | 16.48681 | 1148.403 | 16.56655 | 1148.403 | 16.57566 | 1148.403 | 16.6     | 1148.403 |
| 1148.403 | 16.49    | 1148.403 | 16.57    | 1148.403 | 16.58    | 1148.403 | 16.60577 | 1148.403 |
| 1148.403 | 16.49681 | 1148.403 | 16.57655 | 1148.403 | 16.58566 | 1148.403 | 16.61    | 1148.403 |
| 1148.403 | 16.5     | 1148.403 | 16.58    | 1148.403 | 16.59    | 1148.403 | 16.61577 | 1148.403 |
| 1148.403 | 16.50681 | 1148.403 | 16.58655 | 1148.403 | 16.59566 | 1148.403 | 16.62    | 1148.403 |
| 1148.403 | 16.51    | 1148.403 | 16.59    | 1148.403 | 16.6     | 1148.403 | 16.62577 | 1148.403 |
| 1148.403 | 16.51681 | 1148.403 | 16.59655 | 1148.403 | 16.60566 | 1148.403 | 16.63    | 1148.403 |
| 1148.403 | 16.52    | 1148.403 | 16.6     | 1148.403 | 16.61    | 1148.403 | 16.63577 | 1148.403 |
| 1148.403 | 16.52681 | 1148.403 | 16.60655 | 1148.403 | 16.61566 | 1148.403 | 16.64    | 1148.403 |
| 1148.403 | 16.53    | 1148.403 | 16.61    | 1148.403 | 16.62    | 1148.403 | 16.64577 | 1148.403 |
| 1148.403 | 16.53681 | 1148.403 | 16.61655 | 1148.403 | 16.62566 | 1148.403 | 16.65    | 1148.403 |
| 1148.403 | 16.54    | 1148.403 | 16.62    | 1148.403 | 16.63    | 1148.403 | 16.65577 | 1148.403 |
| 1148.403 | 16.54681 | 1148.403 | 16.62655 | 1148.403 | 16.63566 | 1148.403 | 16.66    | 1148.403 |
| 1148.403 | 16.55    | 1148.403 | 16.63    | 1148.403 | 16.64    | 1148.403 | 16.66577 | 1148.403 |
| 1148.403 | 16.55681 | 1148.403 | 16.63655 | 1148.403 | 16.64566 | 1148.403 | 16.67    | 1148.403 |
| 1148.403 | 16.56    | 1148.403 | 16.64    | 1148.403 | 16.65    | 1148.403 | 16.67577 | 1148.403 |
| 1148.403 | 16.56681 | 1148.403 | 16.64655 | 1148.403 | 16.65566 | 1148.403 | 16.68    | 1148.403 |
| 1148.403 | 16.57    | 1148.403 | 16.65    | 1148.403 | 16.66    | 1148.403 | 16.68577 | 1148.403 |
| 1148.403 | 16.57681 | 1148.403 | 16.65655 | 1148.403 | 16.66566 | 1148.403 | 16.69    | 1148.403 |
| 1148.403 | 16.58    | 1148.403 | 16.66    | 1148.403 | 16.67    | 1148.403 | 16.69577 | 1148.403 |
| 1148.403 | 16.58681 | 1148.403 | 16.66655 | 1148.403 | 16.67566 | 1148.403 | 16.7     | 1148.403 |
| 1148.403 | 16.59    | 1148.403 | 16.67    | 1148.403 | 16.68    | 1148.403 | 16.70577 | 1148.403 |
| 1148.403 | 16.59681 | 1148.403 | 16.67655 | 1148.403 | 16.68566 | 1148.403 | 16.71    | 1148.403 |
| 1148.403 | 16.6     | 1148.403 | 16.68    | 1148.403 | 16.69    | 1148.403 | 16.71577 | 1148.403 |
| 1148.403 | 16.60681 | 1148.403 | 16.68655 | 1148.403 | 16.69566 | 1148.403 | 16.72    | 1148.403 |
| 1148.403 | 16.61    | 1148.403 | 16.69    | 1148.403 | 16.7     | 1148.403 | 16.72577 | 1148.403 |
| 1148.403 | 16.61681 | 1148.403 | 16.69655 | 1148.403 | 16.70566 | 1148.403 | 16.73    | 1148.403 |
| 1148.403 | 16.62    | 1148.403 | 16.7     | 1148.403 | 16.71    | 1148.403 | 16.73577 | 1148.403 |
| 1148.403 | 16.62681 | 1148.403 | 16.70655 | 1148.403 | 16.71566 | 1148.403 | 16.74    | 1148.403 |
| 1148.403 | 16.63    | 1148.403 | 16.71    | 1148.403 | 16.72    | 1148.403 | 16.74577 | 1148.403 |
| 1148.403 | 16.63681 | 1148.403 | 16.71655 | 1148.403 | 16.72566 | 1148.403 | 16.75    | 1148.403 |
| 1148.403 | 16.64    | 1148.403 | 16.72    | 1148.403 | 16.73    | 1148.403 | 16.75577 | 1148.403 |
| 1148.403 | 16.64681 | 1148.403 | 16.72655 | 1148.403 | 16.73566 | 1148.403 | 16.76    | 1148.403 |
| 1148.403 | 16.65    | 1148.403 | 16.73    | 1148.403 | 16.74    | 1148.403 | 16.76577 | 1148.403 |
| 1148.403 | 16.65681 | 1148.403 | 16.73655 | 1148.403 | 16.74566 | 1148.403 | 16.77    | 1148.403 |
| 1148.403 | 16.66    | 1148.403 | 16.74    | 1148.403 | 16.75    | 1148.403 | 16.77577 | 1148.403 |
| 1148.403 | 16.66681 | 1148.403 | 16.74655 | 1148.403 | 16.75566 | 1148.403 | 16.78    | 1148.403 |



|          |          |          |          |          |          |          |          |          |
|----------|----------|----------|----------|----------|----------|----------|----------|----------|
| 1148.403 | 16.67    | 1148.403 | 16.75    | 1148.403 | 16.76    | 1148.403 | 16.78577 | 1148.403 |
| 1148.403 | 16.67681 | 1148.403 | 16.75655 | 1148.403 | 16.76566 | 1148.403 | 16.79    | 1148.403 |
| 1148.403 | 16.68    | 1148.403 | 16.76    | 1148.403 | 16.77    | 1148.403 | 16.79577 | 1148.403 |
| 1148.403 | 16.68681 | 1148.403 | 16.76655 | 1148.403 | 16.77566 | 1148.403 | 16.8     | 1148.403 |
| 1148.403 | 16.69    | 1148.403 | 16.77    | 1148.403 | 16.78    | 1148.403 | 16.80577 | 1148.403 |
| 1148.403 | 16.69681 | 1148.403 | 16.77655 | 1148.403 | 16.78566 | 1148.403 | 16.81    | 1148.403 |
| 1148.403 | 16.7     | 1148.403 | 16.78    | 1148.403 | 16.79    | 1148.403 | 16.81577 | 1148.403 |
| 1148.403 | 16.70681 | 1148.403 | 16.78655 | 1148.403 | 16.79566 | 1148.403 | 16.82    | 1148.403 |
| 1148.403 | 16.71    | 1148.403 | 16.79    | 1148.403 | 16.8     | 1148.403 | 16.82577 | 1148.403 |
| 1148.403 | 16.71681 | 1148.403 | 16.79655 | 1148.403 | 16.80566 | 1148.403 | 16.83    | 1148.403 |
| 1148.403 | 16.72    | 1148.403 | 16.8     | 1148.403 | 16.81    | 1148.403 | 16.83577 | 1148.403 |
| 1148.403 | 16.72681 | 1148.403 | 16.80655 | 1148.403 | 16.81566 | 1148.403 | 16.84    | 1148.403 |
| 1148.403 | 16.73    | 1148.403 | 16.81    | 1148.403 | 16.82    | 1148.403 | 16.84577 | 1148.403 |
| 1148.403 | 16.73681 | 1148.403 | 16.81655 | 1148.403 | 16.82566 | 1148.403 | 16.85    | 1148.403 |
| 1148.403 | 16.74    | 1148.403 | 16.82    | 1148.403 | 16.83    | 1148.403 | 16.85577 | 1148.403 |
| 1148.403 | 16.74681 | 1148.403 | 16.82655 | 1148.403 | 16.83566 | 1148.403 | 16.86    | 1148.403 |
| 1148.403 | 16.75    | 1148.403 | 16.83    | 1148.403 | 16.84    | 1148.403 | 16.86577 | 1148.403 |
| 1148.403 | 16.75681 | 1148.403 | 16.83655 | 1148.403 | 16.84566 | 1148.403 | 16.87    | 1148.403 |
| 1148.403 | 16.76    | 1148.403 | 16.84    | 1148.403 | 16.85    | 1148.403 | 16.87577 | 1148.403 |
| 1148.403 | 16.76681 | 1148.403 | 16.84655 | 1148.403 | 16.85566 | 1148.403 | 16.88    | 1148.403 |
| 1148.403 | 16.77    | 1148.403 | 16.85    | 1148.403 | 16.86    | 1148.403 | 16.88577 | 1148.403 |
| 1148.403 | 16.77681 | 1148.403 | 16.85655 | 1148.403 | 16.86566 | 1148.403 | 16.89    | 1148.403 |
| 1148.403 | 16.78    | 1148.403 | 16.86    | 1148.403 | 16.87    | 1148.403 | 16.89577 | 1148.403 |
| 1148.403 | 16.78681 | 1148.403 | 16.86655 | 1148.403 | 16.87566 | 1148.403 | 16.9     | 1148.403 |
| 1148.403 | 16.79    | 1148.403 | 16.87    | 1148.403 | 16.88    | 1148.403 | 16.90577 | 1148.403 |
| 1148.403 | 16.79681 | 1148.403 | 16.87655 | 1148.403 | 16.88566 | 1148.403 | 16.91    | 1148.403 |
| 1148.403 | 16.8     | 1148.403 | 16.88    | 1148.403 | 16.89    | 1148.403 | 16.91577 | 1148.403 |
| 1148.403 | 16.80681 | 1148.403 | 16.88655 | 1148.403 | 16.89566 | 1148.403 | 16.92    | 1148.403 |
| 1148.403 | 16.81    | 1148.403 | 16.89    | 1148.403 | 16.9     | 1148.403 | 16.92577 | 1148.403 |
| 1148.403 | 16.81641 | 1148.403 | 16.89655 | 1148.403 | 16.90566 | 1148.403 | 16.93    | 1148.403 |
| 1148.403 | 16.81768 | 1148.403 | 16.9     | 1148.403 | 16.91    | 1148.403 | 16.93577 | 1148.403 |
| 1148.403 | 16.82    | 1148.403 | 16.90655 | 1148.403 | 16.91566 | 1148.403 | 16.94    | 1148.403 |
| 1148.403 | 16.82618 | 1148.403 | 16.91    | 1148.403 | 16.92    | 1148.403 | 16.94577 | 1148.403 |
| 1148.403 | 16.83    | 1148.403 | 16.91655 | 1148.403 | 16.92566 | 1148.403 | 16.95    | 1148.403 |
| 1148.403 | 16.83607 | 1148.403 | 16.92    | 1148.403 | 16.93    | 1148.403 | 16.95577 | 1148.403 |
| 1148.403 | 16.84    | 1148.403 | 16.92655 | 1148.403 | 16.93566 | 1148.403 | 16.96    | 1148.403 |
| 1148.403 | 16.84607 | 1148.403 | 16.93    | 1148.403 | 16.94    | 1148.403 | 16.96577 | 1148.403 |
| 1148.403 | 16.85    | 1148.403 | 16.93655 | 1148.403 | 16.94566 | 1148.403 | 16.97    | 1148.403 |
| 1148.403 | 16.85607 | 1148.403 | 16.94    | 1148.403 | 16.95    | 1148.403 | 16.97577 | 1148.403 |
| 1148.403 | 16.86    | 1148.403 | 16.94655 | 1148.403 | 16.95566 | 1148.403 | 16.98    | 1148.403 |
| 1148.403 | 16.86607 | 1148.403 | 16.95    | 1148.403 | 16.96    | 1148.403 | 16.98577 | 1148.403 |
| 1148.403 | 16.87    | 1148.403 | 16.95655 | 1148.403 | 16.96566 | 1148.403 | 16.99    | 1148.403 |
| 1148.403 | 16.87607 | 1148.403 | 16.96    | 1148.403 | 16.97    | 1148.403 | 16.99577 | 1148.403 |
| 1148.403 | 16.88    | 1148.403 | 16.96655 | 1148.403 | 16.97566 | 1148.403 | 17       | 1148.403 |
| 1148.403 | 16.88607 | 1148.403 | 16.97    | 1148.403 | 16.98    | 1148.403 | 17.00577 | 1148.403 |
| 1148.403 | 16.89    | 1148.403 | 16.97655 | 1148.403 | 16.98566 | 1148.403 | 17.01    | 1148.403 |
| 1148.403 | 16.89607 | 1148.403 | 16.98    | 1148.403 | 16.99    | 1148.403 | 17.01577 | 1148.403 |

|          |          |          |          |          |          |          |          |          |
|----------|----------|----------|----------|----------|----------|----------|----------|----------|
| 1148.403 | 16.9     | 1148.403 | 16.98655 | 1148.403 | 16.99566 | 1148.403 | 17.02    | 1148.403 |
| 1148.403 | 16.90607 | 1148.403 | 16.99    | 1148.403 | 17       | 1148.403 | 17.02577 | 1148.403 |
| 1148.403 | 16.91    | 1148.403 | 16.99655 | 1148.403 | 17.00566 | 1148.403 | 17.03    | 1148.403 |
| 1148.403 | 16.91607 | 1148.403 | 17       | 1148.403 | 17.01    | 1148.403 | 17.03577 | 1148.403 |
| 1148.403 | 16.92    | 1148.403 | 17.00655 | 1148.403 | 17.01566 | 1148.403 | 17.04    | 1148.403 |
| 1148.403 | 16.92607 | 1148.403 | 17.01    | 1148.403 | 17.02    | 1148.403 | 17.04577 | 1148.403 |
| 1148.403 | 16.93    | 1148.403 | 17.01655 | 1148.403 | 17.02566 | 1148.403 | 17.05    | 1148.403 |
| 1148.403 | 16.93607 | 1148.403 | 17.02    | 1148.403 | 17.03    | 1148.403 | 17.05577 | 1148.403 |
| 1148.403 | 16.94    | 1148.403 | 17.02655 | 1148.403 | 17.03566 | 1148.403 | 17.06    | 1148.403 |
| 1148.403 | 16.94607 | 1148.403 | 17.03    | 1148.403 | 17.04    | 1148.403 | 17.06577 | 1148.403 |
| 1148.403 | 16.95    | 1148.403 | 17.03655 | 1148.403 | 17.04566 | 1148.403 | 17.07    | 1148.403 |
| 1148.403 | 16.95607 | 1148.403 | 17.04    | 1148.403 | 17.05    | 1148.403 | 17.07577 | 1148.403 |
| 1148.403 | 16.96    | 1148.403 | 17.04655 | 1148.403 | 17.05566 | 1148.403 | 17.08    | 1148.403 |
| 1148.403 | 16.96607 | 1148.403 | 17.05    | 1148.403 | 17.06    | 1148.403 | 17.08577 | 1148.403 |
| 1148.403 | 16.97    | 1148.403 | 17.05655 | 1148.403 | 17.06566 | 1148.403 | 17.09    | 1148.403 |
| 1148.403 | 16.97607 | 1148.403 | 17.06    | 1148.403 | 17.07    | 1148.403 | 17.09577 | 1148.403 |
| 1148.403 | 16.98    | 1148.403 | 17.06655 | 1148.403 | 17.07566 | 1148.403 | 17.1     | 1148.403 |
| 1148.403 | 16.98607 | 1148.403 | 17.07    | 1148.403 | 17.08    | 1148.403 | 17.10577 | 1148.403 |
| 1148.403 | 16.99    | 1148.403 | 17.07655 | 1148.403 | 17.08566 | 1148.403 | 17.11    | 1148.403 |
| 1148.403 | 16.99607 | 1148.403 | 17.08    | 1148.403 | 17.09    | 1148.403 | 17.11577 | 1148.403 |
| 1148.403 | 17       | 1148.403 | 17.08655 | 1148.403 | 17.09566 | 1148.403 | 17.12    | 1148.403 |
| 1148.403 | 17.00607 | 1148.403 | 17.09    | 1148.403 | 17.1     | 1148.403 | 17.12577 | 1148.403 |
| 1148.403 | 17.01    | 1148.403 | 17.09655 | 1148.403 | 17.10566 | 1148.403 | 17.13    | 1148.403 |
| 1148.403 | 17.01607 | 1148.403 | 17.1     | 1148.403 | 17.11    | 1148.403 | 17.13577 | 1148.403 |
| 1148.403 | 17.02    | 1148.403 | 17.10655 | 1148.403 | 17.11566 | 1148.403 | 17.14    | 1148.403 |
| 1148.403 | 17.02607 | 1148.403 | 17.11    | 1148.403 | 17.12    | 1148.403 | 17.14577 | 1148.403 |
| 1148.403 | 17.03    | 1148.403 | 17.11655 | 1148.403 | 17.12566 | 1148.403 | 17.15    | 1148.403 |
| 1148.403 | 17.03607 | 1148.403 | 17.12    | 1148.403 | 17.13    | 1148.403 | 17.15577 | 1148.403 |
| 1148.403 | 17.04    | 1148.403 | 17.12655 | 1148.403 | 17.13566 | 1148.403 | 17.16    | 1148.403 |
| 1148.403 | 17.04607 | 1148.403 | 17.13    | 1148.403 | 17.14    | 1148.403 | 17.16577 | 1148.403 |
| 1148.403 | 17.05    | 1148.403 | 17.13655 | 1148.403 | 17.14566 | 1148.403 | 17.17    | 1148.403 |
| 1148.403 | 17.05607 | 1148.403 | 17.14    | 1148.403 | 17.15    | 1148.403 | 17.17577 | 1148.403 |
| 1148.403 | 17.06    | 1148.403 | 17.14655 | 1148.403 | 17.15566 | 1148.403 | 17.18    | 1148.403 |
| 1148.403 | 17.06607 | 1148.403 | 17.15    | 1148.403 | 17.16    | 1148.403 | 17.18577 | 1148.403 |
| 1148.403 | 17.07    | 1148.403 | 17.15655 | 1148.403 | 17.16566 | 1148.403 | 17.19    | 1148.403 |
| 1148.403 | 17.07607 | 1148.403 | 17.16    | 1148.403 | 17.17    | 1148.403 | 17.19577 | 1148.403 |
| 1148.403 | 17.08    | 1148.403 | 17.16655 | 1148.403 | 17.17566 | 1148.403 | 17.2     | 1148.403 |
| 1148.403 | 17.08607 | 1148.403 | 17.17    | 1148.403 | 17.18    | 1148.403 | 17.20577 | 1148.403 |
| 1148.403 | 17.09    | 1148.403 | 17.17655 | 1148.403 | 17.18566 | 1148.403 | 17.21    | 1148.403 |
| 1148.403 | 17.09607 | 1148.403 | 17.18    | 1148.403 | 17.19    | 1148.403 | 17.21577 | 1148.403 |
| 1148.403 | 17.1     | 1148.403 | 17.18655 | 1148.403 | 17.19566 | 1148.403 | 17.22    | 1148.403 |
| 1148.403 | 17.10607 | 1148.403 | 17.19    | 1148.403 | 17.2     | 1148.403 | 17.22577 | 1148.403 |
| 1148.403 | 17.11    | 1148.403 | 17.19655 | 1148.403 | 17.20566 | 1148.403 | 17.23    | 1148.403 |
| 1148.403 | 17.11607 | 1148.403 | 17.2     | 1148.403 | 17.21    | 1148.403 | 17.23577 | 1148.403 |
| 1148.403 | 17.12    | 1148.403 | 17.20655 | 1148.403 | 17.21566 | 1148.403 | 17.24    | 1148.403 |
| 1148.403 | 17.12607 | 1148.403 | 17.21    | 1148.403 | 17.22    | 1148.403 | 17.24577 | 1148.403 |
| 1148.403 | 17.13    | 1148.403 | 17.21655 | 1148.403 | 17.22566 | 1148.403 | 17.25    | 1148.403 |

|          |          |          |          |          |          |          |          |          |
|----------|----------|----------|----------|----------|----------|----------|----------|----------|
| 1148.403 | 17.13607 | 1148.403 | 17.22    | 1148.403 | 17.23    | 1148.403 | 17.25577 | 1148.403 |
| 1148.403 | 17.14    | 1148.403 | 17.22655 | 1148.403 | 17.23566 | 1148.403 | 17.26    | 1148.403 |
| 1148.403 | 17.14607 | 1148.403 | 17.23    | 1148.403 | 17.24    | 1148.403 | 17.26577 | 1148.403 |
| 1148.403 | 17.15    | 1148.403 | 17.23655 | 1148.403 | 17.24566 | 1148.403 | 17.27    | 1148.403 |
| 1148.403 | 17.15607 | 1148.403 | 17.24    | 1148.403 | 17.25    | 1148.403 | 17.27577 | 1148.403 |
| 1148.403 | 17.16    | 1148.403 | 17.24655 | 1148.403 | 17.25566 | 1148.403 | 17.28    | 1148.403 |
| 1148.403 | 17.16607 | 1148.403 | 17.25    | 1148.403 | 17.26    | 1148.403 | 17.28577 | 1148.403 |
| 1148.403 | 17.17    | 1148.403 | 17.25655 | 1148.403 | 17.26566 | 1148.403 | 17.29    | 1148.403 |
| 1148.403 | 17.17607 | 1148.403 | 17.26    | 1148.403 | 17.27    | 1148.403 | 17.29577 | 1148.403 |
| 1148.403 | 17.18    | 1148.403 | 17.26655 | 1148.403 | 17.27566 | 1148.403 | 17.3     | 1148.403 |
| 1148.403 | 17.18607 | 1148.403 | 17.27    | 1148.403 | 17.28    | 1148.403 | 17.30577 | 1148.403 |
| 1148.403 | 17.19    | 1148.403 | 17.27655 | 1148.403 | 17.28566 | 1148.403 | 17.31    | 1148.403 |
| 1148.403 | 17.19607 | 1148.403 | 17.28    | 1148.403 | 17.29    | 1148.403 | 17.31577 | 1148.403 |
| 1148.403 | 17.2     | 1148.403 | 17.28655 | 1148.403 | 17.29566 | 1148.403 | 17.32    | 1148.403 |
| 1148.403 | 17.20607 | 1148.403 | 17.29    | 1148.403 | 17.3     | 1148.403 | 17.32577 | 1148.403 |
| 1148.403 | 17.21    | 1148.403 | 17.29655 | 1148.403 | 17.30566 | 1148.403 | 17.33    | 1148.403 |
| 1148.403 | 17.21607 | 1148.403 | 17.3     | 1148.403 | 17.31    | 1148.403 | 17.33577 | 1148.403 |
| 1148.403 | 17.22    | 1148.403 | 17.30655 | 1148.403 | 17.31566 | 1148.403 | 17.34    | 1148.403 |
| 1148.403 | 17.22607 | 1148.403 | 17.31    | 1148.403 | 17.32    | 1148.403 | 17.34577 | 1148.403 |
| 1148.403 | 17.23    | 1148.403 | 17.31655 | 1148.403 | 17.32566 | 1148.403 | 17.35    | 1148.403 |
| 1148.403 | 17.23607 | 1148.403 | 17.32    | 1148.403 | 17.33    | 1148.403 | 17.35577 | 1148.403 |
| 1148.403 | 17.24    | 1148.403 | 17.32655 | 1148.403 | 17.33566 | 1148.403 | 17.36    | 1148.403 |
| 1148.403 | 17.24607 | 1148.403 | 17.33    | 1148.403 | 17.34    | 1148.403 | 17.36577 | 1148.403 |
| 1148.403 | 17.25    | 1148.403 | 17.33655 | 1148.403 | 17.34566 | 1148.403 | 17.37    | 1148.403 |
| 1148.403 | 17.25607 | 1148.403 | 17.34    | 1148.403 | 17.35    | 1148.403 | 17.37577 | 1148.403 |
| 1148.403 | 17.26    | 1148.403 | 17.34655 | 1148.403 | 17.35566 | 1148.403 | 17.38    | 1148.403 |
| 1148.403 | 17.26607 | 1148.403 | 17.35    | 1148.403 | 17.36    | 1148.403 | 17.38577 | 1148.403 |
| 1148.403 | 17.27    | 1148.403 | 17.35655 | 1148.403 | 17.36566 | 1148.403 | 17.39    | 1148.403 |
| 1148.403 | 17.27607 | 1148.403 | 17.36    | 1148.403 | 17.37    | 1148.403 | 17.39577 | 1148.403 |
| 1148.403 | 17.28    | 1148.403 | 17.36655 | 1148.403 | 17.37566 | 1148.403 | 17.4     | 1148.403 |
| 1148.403 | 17.28607 | 1148.403 | 17.37    | 1148.403 | 17.38    | 1148.403 | 17.40577 | 1148.403 |
| 1148.403 | 17.29    | 1148.403 | 17.37655 | 1148.403 | 17.38566 | 1148.403 | 17.41    | 1148.403 |
| 1148.403 | 17.29607 | 1148.403 | 17.38    | 1148.403 | 17.39    | 1148.403 | 17.41577 | 1148.403 |
| 1148.403 | 17.3     | 1148.403 | 17.38655 | 1148.403 | 17.39566 | 1148.403 | 17.42    | 1148.403 |
| 1148.403 | 17.30607 | 1148.403 | 17.39    | 1148.403 | 17.4     | 1148.403 | 17.42577 | 1148.403 |
| 1148.403 | 17.31    | 1148.403 | 17.39655 | 1148.403 | 17.40566 | 1148.403 | 17.43    | 1148.403 |
| 1148.403 | 17.31607 | 1148.403 | 17.4     | 1148.403 | 17.41    | 1148.403 | 17.43577 | 1148.403 |
| 1148.403 | 17.32    | 1148.403 | 17.40655 | 1148.403 | 17.41566 | 1148.403 | 17.44    | 1148.403 |
| 1148.403 | 17.32607 | 1148.403 | 17.41    | 1148.403 | 17.42    | 1148.403 | 17.44577 | 1148.403 |
| 1148.403 | 17.33    | 1148.403 | 17.41655 | 1148.403 | 17.42566 | 1148.403 | 17.45    | 1148.403 |
| 1148.403 | 17.33607 | 1148.403 | 17.42    | 1148.403 | 17.43    | 1148.403 | 17.45577 | 1148.403 |
| 1148.403 | 17.34    | 1148.403 | 17.42655 | 1148.403 | 17.43566 | 1148.403 | 17.46    | 1148.403 |
| 1148.403 | 17.34607 | 1148.403 | 17.43    | 1148.403 | 17.44    | 1148.403 | 17.46577 | 1148.403 |
| 1148.403 | 17.35    | 1148.403 | 17.43655 | 1148.403 | 17.44566 | 1148.403 | 17.47    | 1148.403 |
| 1148.403 | 17.35607 | 1148.403 | 17.44    | 1148.403 | 17.45    | 1148.403 | 17.47577 | 1148.403 |
| 1148.403 | 17.36    | 1148.403 | 17.44655 | 1148.403 | 17.45566 | 1148.403 | 17.48    | 1148.403 |
| 1148.403 | 17.36607 | 1148.403 | 17.45    | 1148.403 | 17.46    | 1148.403 | 17.48577 | 1148.403 |

|          |          |          |          |          |          |          |          |          |
|----------|----------|----------|----------|----------|----------|----------|----------|----------|
| 1148.403 | 17.37    | 1148.403 | 17.45655 | 1148.403 | 17.46566 | 1148.403 | 17.49    | 1148.403 |
| 1148.403 | 17.37607 | 1148.403 | 17.46    | 1148.403 | 17.47    | 1148.403 | 17.49577 | 1148.403 |
| 1148.403 | 17.38    | 1148.403 | 17.46655 | 1148.403 | 17.47566 | 1148.403 | 17.5     | 1148.403 |
| 1148.403 | 17.38607 | 1148.403 | 17.47    | 1148.403 | 17.48    | 1148.403 | 17.50577 | 1148.403 |
| 1148.403 | 17.39    | 1148.403 | 17.47655 | 1148.403 | 17.48566 | 1148.403 | 17.51    | 1148.403 |
| 1148.403 | 17.39607 | 1148.403 | 17.48    | 1148.403 | 17.49    | 1148.403 | 17.51577 | 1148.403 |
| 1148.403 | 17.4     | 1148.403 | 17.48655 | 1148.403 | 17.49566 | 1148.403 | 17.52    | 1148.403 |
| 1148.403 | 17.40607 | 1148.403 | 17.49    | 1148.403 | 17.5     | 1148.403 | 17.52577 | 1148.403 |
| 1148.403 | 17.41    | 1148.403 | 17.49655 | 1148.403 | 17.50566 | 1148.403 | 17.53    | 1148.403 |
| 1148.403 | 17.41607 | 1148.403 | 17.5     | 1148.403 | 17.51    | 1148.403 | 17.53577 | 1148.403 |
| 1148.403 | 17.42    | 1148.403 | 17.50655 | 1148.403 | 17.51566 | 1148.403 | 17.54    | 1148.403 |
| 1148.403 | 17.42607 | 1148.403 | 17.51    | 1148.403 | 17.52    | 1148.403 | 17.54577 | 1148.403 |
| 1148.403 | 17.43    | 1148.403 | 17.51655 | 1148.403 | 17.52566 | 1148.403 | 17.55    | 1148.403 |
| 1148.403 | 17.43607 | 1148.403 | 17.52    | 1148.403 | 17.53    | 1148.403 | 17.55577 | 1148.403 |
| 1148.403 | 17.44    | 1148.403 | 17.52655 | 1148.403 | 17.53566 | 1148.403 | 17.56    | 1148.403 |
| 1148.403 | 17.44607 | 1148.403 | 17.53    | 1148.403 | 17.54    | 1148.403 | 17.56577 | 1148.403 |
| 1148.403 | 17.45    | 1148.403 | 17.53655 | 1148.403 | 17.54566 | 1148.403 | 17.57    | 1148.403 |
| 1148.403 | 17.45607 | 1148.403 | 17.54    | 1148.403 | 17.55    | 1148.403 | 17.57577 | 1148.403 |
| 1148.403 | 17.46    | 1148.403 | 17.54655 | 1148.403 | 17.55566 | 1148.403 | 17.58    | 1148.403 |
| 1148.403 | 17.46607 | 1148.403 | 17.55    | 1148.403 | 17.56    | 1148.403 | 17.58577 | 1148.403 |
| 1148.403 | 17.47    | 1148.403 | 17.55655 | 1148.403 | 17.56566 | 1148.403 | 17.59    | 1148.403 |
| 1148.403 | 17.47607 | 1148.403 | 17.56    | 1148.403 | 17.57    | 1148.403 | 17.59577 | 1148.403 |
| 1148.403 | 17.48    | 1148.403 | 17.56655 | 1148.403 | 17.57566 | 1148.403 | 17.6     | 1148.403 |
| 1148.403 | 17.48607 | 1148.403 | 17.57    | 1148.403 | 17.58    | 1148.403 | 17.60577 | 1148.403 |
| 1148.403 | 17.49    | 1148.403 | 17.57655 | 1148.403 | 17.58566 | 1148.403 | 17.61    | 1148.403 |
| 1148.403 | 17.49607 | 1148.403 | 17.58    | 1148.403 | 17.59    | 1148.403 | 17.61577 | 1148.403 |
| 1148.403 | 17.5     | 1148.403 | 17.58655 | 1148.403 | 17.59566 | 1148.403 | 17.62    | 1148.403 |
| 1148.403 | 17.50607 | 1148.403 | 17.59    | 1148.403 | 17.6     | 1148.403 | 17.62577 | 1148.403 |
| 1148.403 | 17.51    | 1148.403 | 17.59655 | 1148.403 | 17.60566 | 1148.403 | 17.63    | 1148.403 |
| 1148.403 | 17.51607 | 1148.403 | 17.6     | 1148.403 | 17.61    | 1148.403 | 17.63577 | 1148.403 |
| 1148.403 | 17.52    | 1148.403 | 17.60655 | 1148.403 | 17.61566 | 1148.403 | 17.64    | 1148.403 |
| 1148.403 | 17.52607 | 1148.403 | 17.61    | 1148.403 | 17.62    | 1148.403 | 17.64577 | 1148.403 |
| 1148.403 | 17.53    | 1148.403 | 17.61655 | 1148.403 | 17.62566 | 1148.403 | 17.65    | 1148.403 |
| 1148.403 | 17.53607 | 1148.403 | 17.62    | 1148.403 | 17.63    | 1148.403 | 17.65577 | 1148.403 |
| 1148.403 | 17.54    | 1148.403 | 17.62655 | 1148.403 | 17.63566 | 1148.403 | 17.66    | 1148.403 |
| 1148.403 | 17.54607 | 1148.403 | 17.63    | 1148.403 | 17.64    | 1148.403 | 17.66577 | 1148.403 |
| 1148.403 | 17.55    | 1148.403 | 17.63655 | 1148.403 | 17.64566 | 1148.403 | 17.67    | 1148.403 |
| 1148.403 | 17.55607 | 1148.403 | 17.64    | 1148.403 | 17.65    | 1148.403 | 17.67577 | 1148.403 |
| 1148.403 | 17.56    | 1148.403 | 17.64655 | 1148.403 | 17.65566 | 1148.403 | 17.68    | 1148.403 |
| 1148.403 | 17.56607 | 1148.403 | 17.65    | 1148.403 | 17.66    | 1148.403 | 17.68577 | 1148.403 |
| 1148.403 | 17.57    | 1148.403 | 17.65655 | 1148.403 | 17.66566 | 1148.403 | 17.69    | 1148.403 |
| 1148.403 | 17.57607 | 1148.403 | 17.66    | 1148.403 | 17.67    | 1148.403 | 17.69577 | 1148.403 |
| 1148.403 | 17.58    | 1148.403 | 17.66655 | 1148.403 | 17.67566 | 1148.403 | 17.7     | 1148.403 |
| 1148.403 | 17.58607 | 1148.403 | 17.67    | 1148.403 | 17.68    | 1148.403 | 17.70577 | 1148.403 |
| 1148.403 | 17.59    | 1148.403 | 17.67655 | 1148.403 | 17.68566 | 1148.403 | 17.71    | 1148.403 |
| 1148.403 | 17.59607 | 1148.403 | 17.68    | 1148.403 | 17.69    | 1148.403 | 17.71577 | 1148.403 |
| 1148.403 | 17.6     | 1148.403 | 17.68655 | 1148.403 | 17.69566 | 1148.403 | 17.72    | 1148.403 |

|          |          |          |          |          |          |          |          |          |
|----------|----------|----------|----------|----------|----------|----------|----------|----------|
| 1148.403 | 17.60607 | 1148.403 | 17.69    | 1148.403 | 17.7     | 1148.403 | 17.72577 | 1148.403 |
| 1148.403 | 17.61    | 1148.403 | 17.69655 | 1148.403 | 17.70566 | 1148.403 | 17.73    | 1148.403 |
| 1148.403 | 17.61607 | 1148.403 | 17.7     | 1148.403 | 17.71    | 1148.403 | 17.73577 | 1148.403 |
| 1148.403 | 17.62    | 1148.403 | 17.70655 | 1148.403 | 17.71566 | 1148.403 | 17.74    | 1148.403 |
| 1148.403 | 17.62607 | 1148.403 | 17.71    | 1148.403 | 17.72    | 1148.403 | 17.74577 | 1148.403 |
| 1148.403 | 17.63    | 1148.403 | 17.71655 | 1148.403 | 17.72566 | 1148.403 | 17.75    | 1148.403 |
| 1148.403 | 17.63607 | 1148.403 | 17.72    | 1148.403 | 17.73    | 1148.403 | 17.75577 | 1148.403 |
| 1148.403 | 17.64    | 1148.403 | 17.72655 | 1148.403 | 17.73566 | 1148.403 | 17.76    | 1148.403 |
| 1148.403 | 17.64607 | 1148.403 | 17.73    | 1148.403 | 17.74    | 1148.403 | 17.76577 | 1148.403 |
| 1148.403 | 17.65    | 1148.403 | 17.73655 | 1148.403 | 17.74566 | 1148.403 | 17.77    | 1148.403 |
| 1148.403 | 17.65607 | 1148.403 | 17.74    | 1148.403 | 17.75    | 1148.403 | 17.77577 | 1148.403 |
| 1148.403 | 17.66    | 1148.403 | 17.74655 | 1148.403 | 17.75566 | 1148.403 | 17.78    | 1148.403 |
| 1148.403 | 17.66607 | 1148.403 | 17.75    | 1148.403 | 17.76    | 1148.403 | 17.78577 | 1148.403 |
| 1148.403 | 17.67    | 1148.403 | 17.75655 | 1148.403 | 17.76566 | 1148.403 | 17.79    | 1148.403 |
| 1148.403 | 17.67607 | 1148.403 | 17.76    | 1148.403 | 17.77    | 1148.403 | 17.79577 | 1148.403 |
| 1148.403 | 17.68    | 1148.403 | 17.76655 | 1148.403 | 17.77566 | 1148.403 | 17.8     | 1148.403 |
| 1148.403 | 17.68607 | 1148.403 | 17.77    | 1148.403 | 17.78    | 1148.403 | 17.80577 | 1148.403 |
| 1148.403 | 17.69    | 1148.403 | 17.77655 | 1148.403 | 17.78566 | 1148.403 | 17.81    | 1148.403 |
| 1148.403 | 17.69607 | 1148.403 | 17.78    | 1148.403 | 17.79    | 1148.403 | 17.81577 | 1148.403 |
| 1148.403 | 17.7     | 1148.403 | 17.78655 | 1148.403 | 17.79566 | 1148.403 | 17.82    | 1148.403 |
| 1148.403 | 17.70607 | 1148.403 | 17.79    | 1148.403 | 17.8     | 1148.403 | 17.82577 | 1148.403 |
| 1148.403 | 17.71    | 1148.403 | 17.79655 | 1148.403 | 17.80566 | 1148.403 | 17.83    | 1148.403 |
| 1148.403 | 17.71607 | 1148.403 | 17.8     | 1148.403 | 17.81    | 1148.403 | 17.83577 | 1148.403 |
| 1148.403 | 17.72    | 1148.403 | 17.80655 | 1148.403 | 17.81566 | 1148.403 | 17.84    | 1148.403 |
| 1148.403 | 17.72607 | 1148.403 | 17.81    | 1148.403 | 17.82    | 1148.403 | 17.84577 | 1148.403 |
| 1148.403 | 17.73    | 1148.403 | 17.81655 | 1148.403 | 17.82566 | 1148.403 | 17.85    | 1148.403 |
| 1148.403 | 17.73607 | 1148.403 | 17.82    | 1148.403 | 17.83    | 1148.403 | 17.85577 | 1148.403 |
| 1148.403 | 17.74    | 1148.403 | 17.82655 | 1148.403 | 17.83566 | 1148.403 | 17.86    | 1148.403 |
| 1148.403 | 17.74607 | 1148.403 | 17.83    | 1148.403 | 17.84    | 1148.403 | 17.86577 | 1148.403 |
| 1148.403 | 17.75    | 1148.403 | 17.83655 | 1148.403 | 17.84566 | 1148.403 | 17.87    | 1148.403 |
| 1148.403 | 17.75607 | 1148.403 | 17.84    | 1148.403 | 17.85    | 1148.403 | 17.87577 | 1148.403 |
| 1148.403 | 17.76    | 1148.403 | 17.84655 | 1148.403 | 17.85566 | 1148.403 | 17.88    | 1148.403 |
| 1148.403 | 17.76607 | 1148.403 | 17.85    | 1148.403 | 17.86    | 1148.403 | 17.88577 | 1148.403 |
| 1148.403 | 17.77    | 1148.403 | 17.85655 | 1148.403 | 17.86566 | 1148.403 | 17.89    | 1148.403 |
| 1148.403 | 17.77607 | 1148.403 | 17.86    | 1148.403 | 17.87    | 1148.403 | 17.89577 | 1148.403 |
| 1148.403 | 17.78    | 1148.403 | 17.86655 | 1148.403 | 17.87566 | 1148.403 | 17.9     | 1148.403 |
| 1148.403 | 17.78607 | 1148.403 | 17.87    | 1148.403 | 17.88    | 1148.403 | 17.90577 | 1148.403 |
| 1148.403 | 17.79    | 1148.403 | 17.87655 | 1148.403 | 17.88566 | 1148.403 | 17.91    | 1148.403 |
| 1148.403 | 17.79607 | 1148.403 | 17.88    | 1148.403 | 17.89    | 1148.403 | 17.91577 | 1148.403 |
| 1148.403 | 17.8     | 1148.403 | 17.88655 | 1148.403 | 17.89566 | 1148.403 | 17.92    | 1148.403 |
| 1148.403 | 17.80607 | 1148.403 | 17.89    | 1148.403 | 17.9     | 1148.403 | 17.92577 | 1148.403 |
| 1148.403 | 17.81    | 1148.403 | 17.89655 | 1148.403 | 17.90566 | 1148.403 | 17.93    | 1148.403 |
| 1148.403 | 17.81607 | 1148.403 | 17.9     | 1148.403 | 17.91    | 1148.403 | 17.93577 | 1148.403 |
| 1148.403 | 17.82    | 1148.403 | 17.90655 | 1148.403 | 17.91566 | 1148.403 | 17.94    | 1148.403 |
| 1148.403 | 17.82607 | 1148.403 | 17.91    | 1148.403 | 17.92    | 1148.403 | 17.94577 | 1148.403 |
| 1148.403 | 17.83    | 1148.403 | 17.91655 | 1148.403 | 17.92566 | 1148.403 | 17.95    | 1148.403 |
| 1148.403 | 17.83607 | 1148.403 | 17.92    | 1148.403 | 17.93    | 1148.403 | 17.95577 | 1148.403 |

|          |          |          |          |          |          |          |          |          |
|----------|----------|----------|----------|----------|----------|----------|----------|----------|
| 1148.403 | 17.84    | 1148.403 | 17.92655 | 1148.403 | 17.93566 | 1148.403 | 17.96    | 1148.403 |
| 1148.403 | 17.84607 | 1148.403 | 17.93    | 1148.403 | 17.94    | 1148.403 | 17.96577 | 1148.403 |
| 1148.403 | 17.85    | 1148.403 | 17.93655 | 1148.403 | 17.94566 | 1148.403 | 17.97    | 1148.403 |
| 1148.403 | 17.85607 | 1148.403 | 17.94    | 1148.403 | 17.95    | 1148.403 | 17.97577 | 1148.403 |
| 1148.403 | 17.86    | 1148.403 | 17.94655 | 1148.403 | 17.95566 | 1148.403 | 17.98    | 1148.403 |
| 1148.403 | 17.86607 | 1148.403 | 17.95    | 1148.403 | 17.96    | 1148.403 | 17.98577 | 1148.403 |
| 1148.403 | 17.87    | 1148.403 | 17.95655 | 1148.403 | 17.96566 | 1148.403 | 17.99    | 1148.403 |
| 1148.403 | 17.87607 | 1148.403 | 17.96    | 1148.403 | 17.97    | 1148.403 | 17.99577 | 1148.403 |
| 1148.403 | 17.88    | 1148.403 | 17.96655 | 1148.403 | 17.97566 | 1148.403 | 18       | 1148.403 |
| 1148.403 | 17.88607 | 1148.403 | 17.97    | 1148.403 | 17.98    | 1148.403 | 18.00577 | 1148.403 |
| 1148.403 | 17.89    | 1148.403 | 17.97655 | 1148.403 | 17.98566 | 1148.403 | 18.01    | 1148.403 |
| 1148.403 | 17.89607 | 1148.403 | 17.98    | 1148.403 | 17.99    | 1148.403 | 18.01577 | 1148.403 |
| 1148.403 | 17.9     | 1148.403 | 17.98655 | 1148.403 | 17.99566 | 1148.403 | 18.02    | 1148.403 |
| 1148.403 | 17.90607 | 1148.403 | 17.99    | 1148.403 | 18       | 1148.403 | 18.02577 | 1148.403 |
| 1148.403 | 17.91    | 1148.403 | 17.99655 | 1148.403 | 18.00566 | 1148.403 | 18.03    | 1148.403 |
| 1148.403 | 17.91607 | 1148.403 | 18       | 1148.403 | 18.01    | 1148.403 | 18.03577 | 1148.403 |
| 1148.403 | 17.92    | 1148.403 | 18.00655 | 1148.403 | 18.01566 | 1148.403 | 18.04    | 1148.403 |
| 1148.403 | 17.92607 | 1148.403 | 18.01    | 1148.403 | 18.02    | 1148.403 | 18.04577 | 1148.403 |
| 1148.403 | 17.93    | 1148.403 | 18.01655 | 1148.403 | 18.02566 | 1148.403 | 18.05    | 1148.403 |
| 1148.403 | 17.93607 | 1148.403 | 18.02    | 1148.403 | 18.03    | 1148.403 | 18.05577 | 1148.403 |
| 1148.403 | 17.94    | 1148.403 | 18.02655 | 1148.403 | 18.03566 | 1148.403 | 18.06    | 1148.403 |
| 1148.403 | 17.94607 | 1148.403 | 18.03    | 1148.403 | 18.04    | 1148.403 | 18.06577 | 1148.403 |
| 1148.403 | 17.95    | 1148.403 | 18.03655 | 1148.403 | 18.04566 | 1148.403 | 18.07    | 1148.403 |
| 1148.403 | 17.95607 | 1148.403 | 18.04    | 1148.403 | 18.05    | 1148.403 | 18.07577 | 1148.403 |
| 1148.403 | 17.96    | 1148.403 | 18.04655 | 1148.403 | 18.05566 | 1148.403 | 18.08    | 1148.403 |
| 1148.403 | 17.96607 | 1148.403 | 18.05    | 1148.403 | 18.06    | 1148.403 | 18.08577 | 1148.403 |
| 1148.403 | 17.97    | 1148.403 | 18.05655 | 1148.403 | 18.06566 | 1148.403 | 18.09    | 1148.403 |
| 1148.403 | 17.97607 | 1148.403 | 18.06    | 1148.403 | 18.07    | 1148.403 | 18.09577 | 1148.403 |
| 1148.403 | 17.98    | 1148.403 | 18.06655 | 1148.403 | 18.07566 | 1148.403 | 18.1     | 1148.403 |
| 1148.403 | 17.98607 | 1148.403 | 18.07    | 1148.403 | 18.08    | 1148.403 | 18.10577 | 1148.403 |
| 1148.403 | 17.99    | 1148.403 | 18.07655 | 1148.403 | 18.08566 | 1148.403 | 18.11    | 1148.403 |
| 1148.403 | 17.99607 | 1148.403 | 18.08    | 1148.403 | 18.09    | 1148.403 | 18.11577 | 1148.403 |
| 1148.403 | 18       | 1148.403 | 18.08655 | 1148.403 | 18.09566 | 1148.403 | 18.12    | 1148.403 |
| 1148.403 | 18.00607 | 1148.403 | 18.09    | 1148.403 | 18.1     | 1148.403 | 18.12577 | 1148.403 |
| 1148.403 | 18.01    | 1148.403 | 18.09655 | 1148.403 | 18.10566 | 1148.403 | 18.13    | 1148.403 |
| 1148.403 | 18.01607 | 1148.403 | 18.1     | 1148.403 | 18.11    | 1148.403 | 18.13577 | 1148.403 |
| 1148.403 | 18.02    | 1148.403 | 18.10655 | 1148.403 | 18.11566 | 1148.403 | 18.14    | 1148.403 |
| 1148.403 | 18.02607 | 1148.403 | 18.11    | 1148.403 | 18.12    | 1148.403 | 18.14577 | 1148.403 |
| 1148.403 | 18.03    | 1148.403 | 18.11655 | 1148.403 | 18.12566 | 1148.403 | 18.15    | 1148.403 |
| 1148.403 | 18.03607 | 1148.403 | 18.12    | 1148.403 | 18.13    | 1148.403 | 18.15577 | 1148.403 |
| 1148.403 | 18.04    | 1148.403 | 18.12655 | 1148.403 | 18.13566 | 1148.403 | 18.16    | 1148.403 |
| 1148.403 | 18.04607 | 1148.403 | 18.13    | 1148.403 | 18.14    | 1148.403 | 18.16577 | 1148.403 |
| 1148.403 | 18.05    | 1148.403 | 18.13655 | 1148.403 | 18.14566 | 1148.403 | 18.17    | 1148.403 |
| 1148.403 | 18.05607 | 1148.403 | 18.14    | 1148.403 | 18.15    | 1148.403 | 18.17577 | 1148.403 |
| 1148.403 | 18.06    | 1148.403 | 18.14655 | 1148.403 | 18.15566 | 1148.403 | 18.18    | 1148.403 |
| 1148.403 | 18.06607 | 1148.403 | 18.15    | 1148.403 | 18.16    | 1148.403 | 18.18577 | 1148.403 |
| 1148.403 | 18.07    | 1148.403 | 18.15655 | 1148.403 | 18.16566 | 1148.403 | 18.19    | 1148.403 |

|          |          |          |          |          |          |          |          |          |
|----------|----------|----------|----------|----------|----------|----------|----------|----------|
| 1148.403 | 18.07607 | 1148.403 | 18.16    | 1148.403 | 18.17    | 1148.403 | 18.19577 | 1148.403 |
| 1148.403 | 18.08    | 1148.403 | 18.16655 | 1148.403 | 18.17566 | 1148.403 | 18.2     | 1148.403 |
| 1148.403 | 18.08607 | 1148.403 | 18.17    | 1148.403 | 18.18    | 1148.403 | 18.20577 | 1148.403 |
| 1148.403 | 18.09    | 1148.403 | 18.17655 | 1148.403 | 18.18566 | 1148.403 | 18.21    | 1148.403 |
| 1148.403 | 18.09607 | 1148.403 | 18.18    | 1148.403 | 18.19    | 1148.403 | 18.21577 | 1148.403 |
| 1148.403 | 18.1     | 1148.403 | 18.18655 | 1148.403 | 18.19566 | 1148.403 | 18.22    | 1148.403 |
| 1148.403 | 18.10607 | 1148.403 | 18.19    | 1148.403 | 18.2     | 1148.403 | 18.22577 | 1148.403 |
| 1148.403 | 18.11    | 1148.403 | 18.19655 | 1148.403 | 18.20566 | 1148.403 | 18.23    | 1148.403 |
| 1148.403 | 18.11607 | 1148.403 | 18.2     | 1148.403 | 18.21    | 1148.403 | 18.23577 | 1148.403 |
| 1148.403 | 18.12    | 1148.403 | 18.20655 | 1148.403 | 18.21566 | 1148.403 | 18.24    | 1148.403 |
| 1148.403 | 18.12607 | 1148.403 | 18.21    | 1148.403 | 18.22    | 1148.403 | 18.24577 | 1148.403 |
| 1148.403 | 18.13    | 1148.403 | 18.21655 | 1148.403 | 18.22566 | 1148.403 | 18.25    | 1148.403 |
| 1148.403 | 18.13607 | 1148.403 | 18.22    | 1148.403 | 18.23    | 1148.403 | 18.25577 | 1148.403 |
| 1148.403 | 18.14    | 1148.403 | 18.22655 | 1148.403 | 18.23566 | 1148.403 | 18.26    | 1148.403 |
| 1148.403 | 18.14607 | 1148.403 | 18.23    | 1148.403 | 18.24    | 1148.403 | 18.26577 | 1148.403 |
| 1148.403 | 18.15    | 1148.403 | 18.23655 | 1148.403 | 18.24566 | 1148.403 | 18.27    | 1148.403 |
| 1148.403 | 18.15607 | 1148.403 | 18.24    | 1148.403 | 18.25    | 1148.403 | 18.27577 | 1148.403 |
| 1148.403 | 18.16    | 1148.403 | 18.24655 | 1148.403 | 18.25566 | 1148.403 | 18.28    | 1148.403 |
| 1148.403 | 18.16607 | 1148.403 | 18.25    | 1148.403 | 18.26    | 1148.403 | 18.28577 | 1148.403 |
| 1148.403 | 18.17    | 1148.403 | 18.25655 | 1148.403 | 18.26566 | 1148.403 | 18.29    | 1148.403 |
| 1148.403 | 18.17607 | 1148.403 | 18.26    | 1148.403 | 18.27    | 1148.403 | 18.29577 | 1148.403 |
| 1148.403 | 18.18    | 1148.403 | 18.26655 | 1148.403 | 18.27566 | 1148.403 | 18.3     | 1148.403 |
| 1148.403 | 18.18607 | 1148.403 | 18.27    | 1148.403 | 18.28    | 1148.403 | 18.30577 | 1148.403 |
| 1148.403 | 18.19    | 1148.403 | 18.27655 | 1148.403 | 18.28566 | 1148.403 | 18.31    | 1148.403 |
| 1148.403 | 18.19607 | 1148.403 | 18.28    | 1148.403 | 18.29    | 1148.403 | 18.31577 | 1148.403 |
| 1148.403 | 18.2     | 1148.403 | 18.28655 | 1148.403 | 18.29566 | 1148.403 | 18.32    | 1148.403 |
| 1148.403 | 18.20607 | 1148.403 | 18.29    | 1148.403 | 18.3     | 1148.403 | 18.32577 | 1148.403 |
| 1148.403 | 18.21    | 1148.403 | 18.29655 | 1148.403 | 18.30566 | 1148.403 | 18.33    | 1148.403 |
| 1148.403 | 18.21607 | 1148.403 | 18.3     | 1148.403 | 18.31    | 1148.403 | 18.33577 | 1148.403 |
| 1148.403 | 18.22    | 1148.403 | 18.30655 | 1148.403 | 18.31566 | 1148.403 | 18.34    | 1148.403 |
| 1148.403 | 18.22607 | 1148.403 | 18.31    | 1148.403 | 18.32    | 1148.403 | 18.34577 | 1148.403 |
| 1148.403 | 18.23    | 1148.403 | 18.31655 | 1148.403 | 18.32566 | 1148.403 | 18.35    | 1148.403 |
| 1148.403 | 18.23607 | 1148.403 | 18.32    | 1148.403 | 18.33    | 1148.403 | 18.35577 | 1148.403 |
| 1148.403 | 18.24    | 1148.403 | 18.32655 | 1148.403 | 18.33566 | 1148.403 | 18.36    | 1148.403 |
| 1148.403 | 18.24607 | 1148.403 | 18.33    | 1148.403 | 18.34    | 1148.403 | 18.36577 | 1148.403 |
| 1148.403 | 18.25    | 1148.403 | 18.33655 | 1148.403 | 18.34566 | 1148.403 | 18.37    | 1148.403 |
| 1148.403 | 18.25607 | 1148.403 | 18.34    | 1148.403 | 18.35    | 1148.403 | 18.37577 | 1148.403 |
| 1148.403 | 18.26    | 1148.403 | 18.34655 | 1148.403 | 18.35566 | 1148.403 | 18.38    | 1148.403 |
| 1148.403 | 18.26607 | 1148.403 | 18.35    | 1148.403 | 18.36    | 1148.403 | 18.38577 | 1148.403 |
| 1148.403 | 18.27    | 1148.403 | 18.35655 | 1148.403 | 18.36566 | 1148.403 | 18.39    | 1148.403 |
| 1148.403 | 18.27607 | 1148.403 | 18.36    | 1148.403 | 18.37    | 1148.403 | 18.39577 | 1148.403 |
| 1148.403 | 18.28    | 1148.403 | 18.36655 | 1148.403 | 18.37566 | 1148.403 | 18.4     | 1148.403 |
| 1148.403 | 18.28607 | 1148.403 | 18.37    | 1148.403 | 18.38    | 1148.403 | 18.40577 | 1148.403 |
| 1148.403 | 18.29    | 1148.403 | 18.37655 | 1148.403 | 18.38566 | 1148.403 | 18.41    | 1148.403 |
| 1148.403 | 18.29607 | 1148.403 | 18.38    | 1148.403 | 18.39    | 1148.403 | 18.41577 | 1148.403 |
| 1148.403 | 18.3     | 1148.403 | 18.38655 | 1148.403 | 18.39566 | 1148.403 | 18.42    | 1148.403 |
| 1148.403 | 18.30607 | 1148.403 | 18.39    | 1148.403 | 18.4     | 1148.403 | 18.42577 | 1148.403 |

|          |          |          |          |          |          |          |          |          |
|----------|----------|----------|----------|----------|----------|----------|----------|----------|
| 1148.403 | 18.31    | 1148.403 | 18.39655 | 1148.403 | 18.40566 | 1148.403 | 18.43    | 1148.403 |
| 1148.403 | 18.31607 | 1148.403 | 18.4     | 1148.403 | 18.41    | 1148.403 | 18.43577 | 1148.403 |
| 1148.403 | 18.32    | 1148.403 | 18.40655 | 1148.403 | 18.41566 | 1148.403 | 18.44    | 1148.403 |
| 1148.403 | 18.32607 | 1148.403 | 18.41    | 1148.403 | 18.42    | 1148.403 | 18.44577 | 1148.403 |
| 1148.403 | 18.33    | 1148.403 | 18.41655 | 1148.403 | 18.42566 | 1148.403 | 18.45    | 1148.403 |
| 1148.403 | 18.33607 | 1148.403 | 18.42    | 1148.403 | 18.43    | 1148.403 | 18.45577 | 1148.403 |
| 1148.403 | 18.34    | 1148.403 | 18.42655 | 1148.403 | 18.43566 | 1148.403 | 18.46    | 1148.403 |
| 1148.403 | 18.34607 | 1148.403 | 18.43    | 1148.403 | 18.44    | 1148.403 | 18.46577 | 1148.403 |
| 1148.403 | 18.35    | 1148.403 | 18.43655 | 1148.403 | 18.44566 | 1148.403 | 18.47    | 1148.403 |
| 1148.403 | 18.35607 | 1148.403 | 18.44    | 1148.403 | 18.45    | 1148.403 | 18.47577 | 1148.403 |
| 1148.403 | 18.36    | 1148.403 | 18.44655 | 1148.403 | 18.45566 | 1148.403 | 18.48    | 1148.403 |
| 1148.403 | 18.36607 | 1148.403 | 18.45    | 1148.403 | 18.46    | 1148.403 | 18.48577 | 1148.403 |
| 1148.403 | 18.37    | 1148.403 | 18.45655 | 1148.403 | 18.46566 | 1148.403 | 18.49    | 1148.403 |
| 1148.403 | 18.37607 | 1148.403 | 18.46    | 1148.403 | 18.47    | 1148.403 | 18.49577 | 1148.403 |
| 1148.403 | 18.38    | 1148.403 | 18.46655 | 1148.403 | 18.47566 | 1148.403 | 18.5     | 1148.403 |
| 1148.403 | 18.38607 | 1148.403 | 18.47    | 1148.403 | 18.48    | 1148.403 | 18.50577 | 1148.403 |
| 1148.403 | 18.39    | 1148.403 | 18.47655 | 1148.403 | 18.48566 | 1148.403 | 18.51    | 1148.403 |
| 1148.403 | 18.39607 | 1148.403 | 18.48    | 1148.403 | 18.49    | 1148.403 | 18.51577 | 1148.403 |
| 1148.403 | 18.4     | 1148.403 | 18.48655 | 1148.403 | 18.49566 | 1148.403 | 18.52    | 1148.403 |
| 1148.403 | 18.40607 | 1148.403 | 18.49    | 1148.403 | 18.5     | 1148.403 | 18.52577 | 1148.403 |
| 1148.403 | 18.41    | 1148.403 | 18.49655 | 1148.403 | 18.50566 | 1148.403 | 18.53    | 1148.403 |
| 1148.403 | 18.41607 | 1148.403 | 18.5     | 1148.403 | 18.51    | 1148.403 | 18.53577 | 1148.403 |
| 1148.403 | 18.42    | 1148.403 | 18.50655 | 1148.403 | 18.51566 | 1148.403 | 18.54    | 1148.403 |
| 1148.403 | 18.42607 | 1148.403 | 18.51    | 1148.403 | 18.52    | 1148.403 | 18.54577 | 1148.403 |
| 1148.403 | 18.43    | 1148.403 | 18.51655 | 1148.403 | 18.52566 | 1148.403 | 18.55    | 1148.403 |
| 1148.403 | 18.43607 | 1148.403 | 18.52    | 1148.403 | 18.53    | 1148.403 | 18.55577 | 1148.403 |
| 1148.403 | 18.44    | 1148.403 | 18.52655 | 1148.403 | 18.53566 | 1148.403 | 18.56    | 1148.403 |
| 1148.403 | 18.44607 | 1148.403 | 18.53    | 1148.403 | 18.54    | 1148.403 | 18.56577 | 1148.403 |
| 1148.403 | 18.45    | 1148.403 | 18.53655 | 1148.403 | 18.54566 | 1148.403 | 18.57    | 1148.403 |
| 1148.403 | 18.45607 | 1148.403 | 18.54    | 1148.403 | 18.55    | 1148.403 | 18.57577 | 1148.403 |
| 1148.403 | 18.46    | 1148.403 | 18.54655 | 1148.403 | 18.55566 | 1148.403 | 18.58    | 1148.403 |
| 1148.403 | 18.46607 | 1148.403 | 18.55    | 1148.403 | 18.56    | 1148.403 | 18.58577 | 1148.403 |
| 1148.403 | 18.47    | 1148.403 | 18.55655 | 1148.403 | 18.56566 | 1148.403 | 18.59    | 1148.403 |
| 1148.403 | 18.47607 | 1148.403 | 18.56    | 1148.403 | 18.57    | 1148.403 | 18.59577 | 1148.403 |
| 1148.403 | 18.48    | 1148.403 | 18.56655 | 1148.403 | 18.57566 | 1148.403 | 18.6     | 1148.403 |
| 1148.403 | 18.48607 | 1148.403 | 18.57    | 1148.403 | 18.58    | 1148.403 | 18.60577 | 1148.403 |
| 1148.403 | 18.49    | 1148.403 | 18.57655 | 1148.403 | 18.58566 | 1148.403 | 18.61    | 1148.403 |
| 1148.403 | 18.49607 | 1148.403 | 18.58    | 1148.403 | 18.59    | 1148.403 | 18.61577 | 1148.403 |
| 1148.403 | 18.5     | 1148.403 | 18.58655 | 1148.403 | 18.59566 | 1148.403 | 18.62    | 1148.403 |
| 1148.403 | 18.50607 | 1148.403 | 18.59    | 1148.403 | 18.6     | 1148.403 | 18.62577 | 1148.403 |
| 1148.403 | 18.51    | 1148.403 | 18.59655 | 1148.403 | 18.60566 | 1148.403 | 18.63    | 1148.403 |
| 1148.403 | 18.51607 | 1148.403 | 18.6     | 1148.403 | 18.61    | 1148.403 | 18.63577 | 1148.403 |
| 1148.403 | 18.52    | 1148.403 | 18.60655 | 1148.403 | 18.61566 | 1148.403 | 18.64    | 1148.403 |
| 1148.403 | 18.52607 | 1148.403 | 18.61    | 1148.403 | 18.62    | 1148.403 | 18.64577 | 1148.403 |
| 1148.403 | 18.53    | 1148.403 | 18.61655 | 1148.403 | 18.62566 | 1148.403 | 18.65    | 1148.403 |
| 1148.403 | 18.53607 | 1148.403 | 18.62    | 1148.403 | 18.63    | 1148.403 | 18.65577 | 1148.403 |
| 1148.403 | 18.54    | 1148.403 | 18.62655 | 1148.403 | 18.63566 | 1148.403 | 18.66    | 1148.403 |



|          |          |          |          |          |          |          |          |          |
|----------|----------|----------|----------|----------|----------|----------|----------|----------|
| 1148.403 | 18.54607 | 1148.403 | 18.63    | 1148.403 | 18.64    | 1148.403 | 18.66577 | 1148.403 |
| 1148.403 | 18.55    | 1148.403 | 18.63655 | 1148.403 | 18.64566 | 1148.403 | 18.67    | 1148.403 |
| 1148.403 | 18.55607 | 1148.403 | 18.64    | 1148.403 | 18.65    | 1148.403 | 18.67577 | 1148.403 |
| 1148.403 | 18.56    | 1148.403 | 18.64655 | 1148.403 | 18.65566 | 1148.403 | 18.68    | 1148.403 |
| 1148.403 | 18.56607 | 1148.403 | 18.65    | 1148.403 | 18.66    | 1148.403 | 18.68577 | 1148.403 |
| 1148.403 | 18.57    | 1148.403 | 18.65655 | 1148.403 | 18.66566 | 1148.403 | 18.69    | 1148.403 |
| 1148.403 | 18.57607 | 1148.403 | 18.66    | 1148.403 | 18.67    | 1148.403 | 18.69577 | 1148.403 |
| 1148.403 | 18.58    | 1148.403 | 18.66655 | 1148.403 | 18.67566 | 1148.403 | 18.7     | 1148.403 |
| 1148.403 | 18.58607 | 1148.403 | 18.67    | 1148.403 | 18.68    | 1148.403 | 18.70577 | 1148.403 |
| 1148.403 | 18.59    | 1148.403 | 18.67655 | 1148.403 | 18.68566 | 1148.403 | 18.71    | 1148.403 |
| 1148.403 | 18.59607 | 1148.403 | 18.68    | 1148.403 | 18.69    | 1148.403 | 18.71577 | 1148.403 |
| 1148.403 | 18.6     | 1148.403 | 18.68655 | 1148.403 | 18.69566 | 1148.403 | 18.72    | 1148.403 |
| 1148.403 | 18.60607 | 1148.403 | 18.69    | 1148.403 | 18.7     | 1148.403 | 18.72577 | 1148.403 |
| 1148.403 | 18.61    | 1148.403 | 18.69655 | 1148.403 | 18.70566 | 1148.403 | 18.73    | 1148.403 |
| 1148.403 | 18.61607 | 1148.403 | 18.7     | 1148.403 | 18.71    | 1148.403 | 18.73577 | 1148.403 |
| 1148.403 | 18.62    | 1148.403 | 18.70655 | 1148.403 | 18.71566 | 1148.403 | 18.74    | 1148.403 |
| 1148.403 | 18.62607 | 1148.403 | 18.71    | 1148.403 | 18.71814 | 1148.403 | 18.74577 | 1148.403 |
| 1148.403 | 18.63    | 1148.403 | 18.71655 | 1148.403 | 18.72    | 1148.403 | 18.75    | 1148.403 |
| 1148.403 | 18.63607 | 1148.403 | 18.72    | 1148.403 | 18.72248 | 1148.403 | 18.75577 | 1148.403 |
| 1148.403 | 18.64    | 1148.403 | 18.72655 | 1148.403 | 18.73    | 1148.403 | 18.76    | 1148.403 |
| 1148.403 | 18.64607 | 1148.403 | 18.73    | 1148.403 | 18.73248 | 1148.403 | 18.76577 | 1148.403 |
| 1148.403 | 18.65    | 1148.403 | 18.73655 | 1148.403 | 18.74    | 1148.403 | 18.77    | 1148.403 |
| 1148.403 | 18.65607 | 1148.403 | 18.73894 | 1148.403 | 18.74248 | 1148.403 | 18.77577 | 1148.403 |
| 1148.403 | 18.66    | 1148.403 | 18.74    | 1148.403 | 18.75    | 1148.403 | 18.78    | 1148.403 |
| 1148.403 | 18.66607 | 1148.403 | 18.74239 | 1148.403 | 18.75248 | 1148.403 | 18.78577 | 1148.403 |
| 1148.403 | 18.67    | 1148.403 | 18.75    | 1148.403 | 18.76    | 1148.403 | 18.78914 | 1148.403 |
| 1148.403 | 18.67607 | 1148.403 | 18.75239 | 1148.403 | 18.76248 | 1148.403 | 18.79042 | 1148.403 |
| 1148.403 | 18.68    | 1148.403 | 18.76    | 1148.403 | 18.76386 | 1148.403 | 18.79337 | 1148.403 |
| 1148.403 | 18.68607 | 1148.403 | 18.76239 | 1148.403 | 18.77    | 1148.403 | 18.8     | 1148.403 |
| 1148.403 | 18.69    | 1148.403 | 18.77    | 1148.403 | 18.77158 | 1148.403 | 18.80337 | 1148.403 |
| 1148.403 | 18.69607 | 1148.403 | 18.77239 | 1148.403 | 18.78    | 1148.403 | 18.81    | 1148.403 |
| 1148.403 | 18.7     | 1148.403 | 18.78    | 1148.403 | 18.78158 | 1148.403 | 18.81337 | 1148.403 |
| 1148.403 | 18.70607 | 1148.403 | 18.78239 | 1148.403 | 18.79    | 1148.403 | 18.82    | 1148.403 |
| 1148.403 | 18.71    | 1148.403 | 18.78379 | 1148.403 | 18.79158 | 1148.403 | 18.82337 | 1148.403 |
| 1148.403 | 18.71607 | 1148.403 | 18.79    | 1148.403 | 18.8     | 1148.403 | 18.83    | 1148.403 |
| 1148.403 | 18.72    | 1148.403 | 18.7916  | 1148.403 | 18.80158 | 1148.403 | 18.83337 | 1148.403 |
| 1148.403 | 18.72607 | 1148.403 | 18.8     | 1148.403 | 18.81    | 1148.403 | 18.84    | 1148.403 |
| 1148.403 | 18.73    | 1148.403 | 18.8016  | 1148.403 | 18.81158 | 1148.403 | 18.84337 | 1148.403 |
| 1148.403 | 18.73607 | 1148.403 | 18.81    | 1148.403 | 18.82    | 1148.403 | 18.85    | 1148.403 |
| 1148.403 | 18.74    | 1148.403 | 18.8116  | 1148.403 | 18.82158 | 1148.403 | 18.85337 | 1148.403 |
| 1148.403 | 18.74607 | 1148.403 | 18.82    | 1148.403 | 18.83    | 1148.403 | 18.86    | 1148.403 |
| 1148.403 | 18.75    | 1148.403 | 18.8216  | 1148.403 | 18.83158 | 1148.403 | 18.86337 | 1148.403 |
| 1148.403 | 18.75607 | 1148.403 | 18.83    | 1148.403 | 18.84    | 1148.403 | 18.87    | 1148.403 |
| 1148.403 | 18.75917 | 1148.403 | 18.8316  | 1148.403 | 18.84158 | 1148.403 | 18.87337 | 1148.403 |
| 1148.403 | 18.76039 | 1148.403 | 18.84    | 1148.403 | 18.85    | 1148.403 | 18.88    | 1148.403 |
| 1148.403 | 18.7631  | 1148.403 | 18.8416  | 1148.403 | 18.85158 | 1148.403 | 18.88337 | 1148.403 |
| 1148.403 | 18.77    | 1148.403 | 18.85    | 1148.403 | 18.86    | 1148.403 | 18.89    | 1148.403 |

|          |          |          |         |          |          |          |          |          |
|----------|----------|----------|---------|----------|----------|----------|----------|----------|
| 1148.403 | 18.7731  | 1148.403 | 18.8516 | 1148.403 | 18.86158 | 1148.403 | 18.89337 | 1148.403 |
| 1148.403 | 18.78    | 1148.403 | 18.86   | 1148.403 | 18.87    | 1148.403 | 18.9     | 1148.403 |
| 1148.403 | 18.7831  | 1148.403 | 18.8616 | 1148.403 | 18.87158 | 1148.403 | 18.90337 | 1148.403 |
| 1148.403 | 18.79    | 1148.403 | 18.87   | 1148.403 | 18.88    | 1148.403 | 18.91    | 1148.403 |
| 1148.403 | 18.7931  | 1148.403 | 18.8716 | 1148.403 | 18.88158 | 1148.403 | 18.91337 | 1148.403 |
| 1148.403 | 18.8     | 1148.403 | 18.88   | 1148.403 | 18.89    | 1148.403 | 18.92    | 1148.403 |
| 1148.403 | 18.8031  | 1148.403 | 18.8816 | 1148.403 | 18.89158 | 1148.403 | 18.92337 | 1148.403 |
| 1148.403 | 18.81    | 1148.403 | 18.89   | 1148.403 | 18.9     | 1148.403 | 18.93    | 1148.403 |
| 1148.403 | 18.8131  | 1148.403 | 18.8916 | 1148.403 | 18.90158 | 1148.403 | 18.93337 | 1148.403 |
| 1148.403 | 18.82    | 1148.403 | 18.9    | 1148.403 | 18.91    | 1148.403 | 18.94    | 1148.403 |
| 1148.403 | 18.8231  | 1148.403 | 18.9016 | 1148.403 | 18.91158 | 1148.403 | 18.94337 | 1148.403 |
| 1148.403 | 18.83    | 1148.403 | 18.91   | 1148.403 | 18.92    | 1148.403 | 18.95    | 1148.403 |
| 1148.403 | 18.8331  | 1148.403 | 18.9116 | 1148.403 | 18.92158 | 1148.403 | 18.95337 | 1148.403 |
| 1148.403 | 18.83895 | 1148.403 | 18.92   | 1148.403 | 18.93    | 1148.403 | 18.96    | 1148.403 |
| 1148.403 | 18.84    | 1148.403 | 18.9216 | 1148.403 | 18.93158 | 1148.403 | 18.96337 | 1148.403 |
| 1148.403 | 18.84668 | 1148.403 | 18.93   | 1148.403 | 18.94    | 1148.403 | 18.97    | 1148.403 |
| 1148.403 | 18.85    | 1148.403 | 18.9316 | 1148.403 | 18.94158 | 1148.403 | 18.97337 | 1148.403 |
| 1148.403 | 18.85668 | 1148.403 | 18.94   | 1148.403 | 18.95    | 1148.403 | 18.98    | 1148.403 |
| 1148.403 | 18.86    | 1148.403 | 18.9416 | 1148.403 | 18.95158 | 1148.403 | 18.98337 | 1148.403 |
| 1148.403 | 18.86668 | 1148.403 | 18.95   | 1148.403 | 18.96    | 1148.403 | 18.99    | 1148.403 |
| 1148.403 | 18.87    | 1148.403 | 18.9516 | 1148.403 | 18.96158 | 1148.403 | 18.99337 | 1148.403 |
| 1148.403 | 18.87668 | 1148.403 | 18.96   | 1148.403 | 18.97    | 1148.403 | 19       | 1148.403 |
| 1148.403 | 18.88    | 1148.403 | 18.9616 | 1148.403 | 18.97158 | 1148.403 | 19.00337 | 1148.403 |
| 1148.403 | 18.88668 | 1148.403 | 18.97   | 1148.403 | 18.98    | 1148.403 | 19.01    | 1148.403 |
| 1148.403 | 18.89    | 1148.403 | 18.9716 | 1148.403 | 18.98158 | 1148.403 | 19.01337 | 1148.403 |
| 1148.403 | 18.89668 | 1148.403 | 18.98   | 1148.403 | 18.99    | 1148.403 | 19.02    | 1148.403 |
| 1148.403 | 18.9     | 1148.403 | 18.9816 | 1148.403 | 18.99158 | 1148.403 | 19.02337 | 1148.403 |
| 1148.403 | 18.90668 | 1148.403 | 18.99   | 1148.403 | 19       | 1148.403 | 19.03    | 1148.403 |
| 1148.403 | 18.91    | 1148.403 | 18.9916 | 1148.403 | 19.00158 | 1148.403 | 19.03337 | 1148.403 |
| 1148.403 | 18.91668 | 1148.403 | 19      | 1148.403 | 19.01    | 1148.403 | 19.04    | 1148.403 |
| 1148.403 | 18.92    | 1148.403 | 19.0016 | 1148.403 | 19.01158 | 1148.403 | 19.04337 | 1148.403 |
| 1148.403 | 18.92668 | 1148.403 | 19.01   | 1148.403 | 19.02    | 1148.403 | 19.05    | 1148.403 |
| 1148.403 | 18.93    | 1148.403 | 19.0116 | 1148.403 | 19.02158 | 1148.403 | 19.05337 | 1148.403 |
| 1148.403 | 18.93668 | 1148.403 | 19.02   | 1148.403 | 19.03    | 1148.403 | 19.06    | 1148.403 |
| 1148.403 | 18.94    | 1148.403 | 19.0216 | 1148.403 | 19.03158 | 1148.403 | 19.06337 | 1148.403 |
| 1148.403 | 18.94668 | 1148.403 | 19.03   | 1148.403 | 19.04    | 1148.403 | 19.07    | 1148.403 |
| 1148.403 | 18.95    | 1148.403 | 19.0316 | 1148.403 | 19.04158 | 1148.403 | 19.07337 | 1148.403 |
| 1148.403 | 18.95668 | 1148.403 | 19.04   | 1148.403 | 19.05    | 1148.403 | 19.07489 | 1148.403 |
| 1148.403 | 18.96    | 1148.403 | 19.0416 | 1148.403 | 19.05158 | 1148.403 | 19.08    | 1148.403 |
| 1148.403 | 18.96668 | 1148.403 | 19.05   | 1148.403 | 19.06    | 1148.403 | 19.08133 | 1148.403 |
| 1148.403 | 18.97    | 1148.403 | 19.0516 | 1148.403 | 19.06158 | 1148.403 | 19.08461 | 1148.403 |
| 1148.403 | 18.97668 | 1148.403 | 19.06   | 1148.403 | 19.07    | 1148.403 | 19.09    | 1148.403 |
| 1148.403 | 18.98    | 1148.403 | 19.0616 | 1148.403 | 19.07158 | 1148.403 | 19.09315 | 1148.403 |
| 1148.403 | 18.98668 | 1148.403 | 19.07   | 1148.403 | 19.08    | 1148.403 | 19.1     | 1148.403 |
| 1148.403 | 18.99    | 1148.403 | 19.0716 | 1148.403 | 19.08158 | 1148.403 | 19.10315 | 1148.403 |
| 1148.403 | 18.99668 | 1148.403 | 19.08   | 1148.403 | 19.09    | 1148.403 | 19.11    | 1148.403 |
| 1148.403 | 19       | 1148.403 | 19.0816 | 1148.403 | 19.09158 | 1148.403 | 19.11315 | 1148.403 |

|          |          |          |         |          |          |          |          |          |
|----------|----------|----------|---------|----------|----------|----------|----------|----------|
| 1148.403 | 19.00668 | 1148.403 | 19.09   | 1148.403 | 19.1     | 1148.403 | 19.12    | 1148.403 |
| 1148.403 | 19.01    | 1148.403 | 19.0916 | 1148.403 | 19.10158 | 1148.403 | 19.12315 | 1148.403 |
| 1148.403 | 19.01668 | 1148.403 | 19.1    | 1148.403 | 19.11    | 1148.403 | 19.13    | 1148.403 |
| 1148.403 | 19.02    | 1148.403 | 19.1016 | 1148.403 | 19.11158 | 1148.403 | 19.13315 | 1148.403 |
| 1148.403 | 19.02668 | 1148.403 | 19.11   | 1148.403 | 19.12    | 1148.403 | 19.14    | 1148.403 |
| 1148.403 | 19.03    | 1148.403 | 19.1116 | 1148.403 | 19.12158 | 1148.403 | 19.14315 | 1148.403 |
| 1148.403 | 19.03668 | 1148.403 | 19.12   | 1148.403 | 19.13    | 1148.403 | 19.15    | 1148.403 |
| 1148.403 | 19.04    | 1148.403 | 19.1216 | 1148.403 | 19.13158 | 1148.403 | 19.15315 | 1148.403 |
| 1148.403 | 19.04668 | 1148.403 | 19.13   | 1148.403 | 19.14    | 1148.403 | 19.16    | 1148.403 |
| 1148.403 | 19.05    | 1148.403 | 19.1316 | 1148.403 | 19.14158 | 1148.403 | 19.16315 | 1148.403 |
| 1148.403 | 19.05668 | 1148.403 | 19.14   | 1148.403 | 19.15    | 1148.403 | 19.17    | 1148.403 |
| 1148.403 | 19.06    | 1148.403 | 19.1416 | 1148.403 | 19.15158 | 1148.403 | 19.17315 | 1148.403 |
| 1148.403 | 19.06668 | 1148.403 | 19.15   | 1148.403 | 19.16    | 1148.403 | 19.18    | 1148.403 |
| 1148.403 | 19.07    | 1148.403 | 19.1516 | 1148.403 | 19.16158 | 1148.403 | 19.18315 | 1148.403 |
| 1148.403 | 19.07668 | 1148.403 | 19.16   | 1148.403 | 19.17    | 1148.403 | 19.19    | 1148.403 |
| 1148.403 | 19.08    | 1148.403 | 19.1616 | 1148.403 | 19.17158 | 1148.403 | 19.19315 | 1148.403 |
| 1148.403 | 19.08668 | 1148.403 | 19.17   | 1148.403 | 19.18    | 1148.403 | 19.2     | 1148.403 |
| 1148.403 | 19.09    | 1148.403 | 19.1716 | 1148.403 | 19.18158 | 1148.403 | 19.20315 | 1148.403 |
| 1148.403 | 19.09668 | 1148.403 | 19.18   | 1148.403 | 19.19    | 1148.403 | 19.21    | 1148.403 |
| 1148.403 | 19.1     | 1148.403 | 19.1816 | 1148.403 | 19.19158 | 1148.403 | 19.21315 | 1148.403 |
| 1148.403 | 19.10668 | 1148.403 | 19.19   | 1148.403 | 19.2     | 1148.403 | 19.22    | 1148.403 |
| 1148.403 | 19.11    | 1148.403 | 19.1916 | 1148.403 | 19.20158 | 1148.403 | 19.22315 | 1148.403 |
| 1148.403 | 19.11668 | 1148.403 | 19.2    | 1148.403 | 19.21    | 1148.403 | 19.23    | 1148.403 |
| 1148.403 | 19.12    | 1148.403 | 19.2016 | 1148.403 | 19.21158 | 1148.403 | 19.23315 | 1148.403 |
| 1148.403 | 19.12668 | 1148.403 | 19.21   | 1148.403 | 19.22    | 1148.403 | 19.24    | 1148.403 |
| 1148.403 | 19.13    | 1148.403 | 19.2116 | 1148.403 | 19.22158 | 1148.403 | 19.24315 | 1148.403 |
| 1148.403 | 19.13668 | 1148.403 | 19.22   | 1148.403 | 19.23    | 1148.403 | 19.25    | 1148.403 |
| 1148.403 | 19.14    | 1148.403 | 19.2216 | 1148.403 | 19.23158 | 1148.403 | 19.25315 | 1148.403 |
| 1148.403 | 19.14668 | 1148.403 | 19.23   | 1148.403 | 19.24    | 1148.403 | 19.26    | 1148.403 |
| 1148.403 | 19.15    | 1148.403 | 19.2316 | 1148.403 | 19.24158 | 1148.403 | 19.26315 | 1148.403 |
| 1148.403 | 19.15668 | 1148.403 | 19.24   | 1148.403 | 19.25    | 1148.403 | 19.27    | 1148.403 |
| 1148.403 | 19.16    | 1148.403 | 19.2416 | 1148.403 | 19.25158 | 1148.403 | 19.27315 | 1148.403 |
| 1148.403 | 19.16668 | 1148.403 | 19.25   | 1148.403 | 19.26    | 1148.403 | 19.28    | 1148.403 |
| 1148.403 | 19.17    | 1148.403 | 19.2516 | 1148.403 | 19.26158 | 1148.403 | 19.28315 | 1148.403 |
| 1148.403 | 19.17668 | 1148.403 | 19.26   | 1148.403 | 19.27    | 1148.403 | 19.29    | 1148.403 |
| 1148.403 | 19.18    | 1148.403 | 19.2616 | 1148.403 | 19.27158 | 1148.403 | 19.29315 | 1148.403 |
| 1148.403 | 19.18668 | 1148.403 | 19.27   | 1148.403 | 19.28    | 1148.403 | 19.3     | 1148.403 |
| 1148.403 | 19.19    | 1148.403 | 19.2716 | 1148.403 | 19.28158 | 1148.403 | 19.30315 | 1148.403 |
| 1148.403 | 19.19668 | 1148.403 | 19.28   | 1148.403 | 19.29    | 1148.403 | 19.31    | 1148.403 |
| 1148.403 | 19.2     | 1148.403 | 19.2816 | 1148.403 | 19.29158 | 1148.403 | 19.31315 | 1148.403 |
| 1148.403 | 19.20668 | 1148.403 | 19.29   | 1148.403 | 19.3     | 1148.403 | 19.32    | 1148.403 |
| 1148.403 | 19.21    | 1148.403 | 19.2916 | 1148.403 | 19.30158 | 1148.403 | 19.32315 | 1148.403 |
| 1148.403 | 19.21668 | 1148.403 | 19.3    | 1148.403 | 19.31    | 1148.403 | 19.33    | 1148.403 |
| 1148.403 | 19.22    | 1148.403 | 19.3016 | 1148.403 | 19.31158 | 1148.403 | 19.33315 | 1148.403 |
| 1148.403 | 19.22668 | 1148.403 | 19.31   | 1148.403 | 19.32    | 1148.403 | 19.34    | 1148.403 |
| 1148.403 | 19.23    | 1148.403 | 19.3116 | 1148.403 | 19.32158 | 1148.403 | 19.34315 | 1148.403 |
| 1148.403 | 19.23668 | 1148.403 | 19.32   | 1148.403 | 19.33    | 1148.403 | 19.35    | 1148.403 |

|          |          |          |         |          |          |          |          |          |
|----------|----------|----------|---------|----------|----------|----------|----------|----------|
| 1148.403 | 19.24    | 1148.403 | 19.3216 | 1148.403 | 19.33158 | 1148.403 | 19.35315 | 1148.403 |
| 1148.403 | 19.24668 | 1148.403 | 19.33   | 1148.403 | 19.34    | 1148.403 | 19.36    | 1148.403 |
| 1148.403 | 19.25    | 1148.403 | 19.3316 | 1148.403 | 19.34158 | 1148.403 | 19.36315 | 1148.403 |
| 1148.403 | 19.25668 | 1148.403 | 19.34   | 1148.403 | 19.35    | 1148.403 | 19.37    | 1148.403 |
| 1148.403 | 19.26    | 1148.403 | 19.3416 | 1148.403 | 19.35158 | 1148.403 | 19.37315 | 1148.403 |
| 1148.403 | 19.26668 | 1148.403 | 19.35   | 1148.403 | 19.36    | 1148.403 | 19.38    | 1148.403 |
| 1148.403 | 19.27    | 1148.403 | 19.3516 | 1148.403 | 19.36158 | 1148.403 | 19.38315 | 1148.403 |
| 1148.403 | 19.27668 | 1148.403 | 19.36   | 1148.403 | 19.37    | 1148.403 | 19.39    | 1148.403 |
| 1148.403 | 19.28    | 1148.403 | 19.3616 | 1148.403 | 19.37158 | 1148.403 | 19.39315 | 1148.403 |
| 1148.403 | 19.28668 | 1148.403 | 19.37   | 1148.403 | 19.38    | 1148.403 | 19.4     | 1148.403 |
| 1148.403 | 19.29    | 1148.403 | 19.3716 | 1148.403 | 19.38158 | 1148.403 | 19.40315 | 1148.403 |
| 1148.403 | 19.29668 | 1148.403 | 19.38   | 1148.403 | 19.39    | 1148.403 | 19.41    | 1148.403 |
| 1148.403 | 19.3     | 1148.403 | 19.3816 | 1148.403 | 19.39158 | 1148.403 | 19.41315 | 1148.403 |
| 1148.403 | 19.30668 | 1148.403 | 19.39   | 1148.403 | 19.4     | 1148.403 | 19.42    | 1148.403 |
| 1148.403 | 19.31    | 1148.403 | 19.3916 | 1148.403 | 19.40158 | 1148.403 | 19.42315 | 1148.403 |
| 1148.403 | 19.31668 | 1148.403 | 19.4    | 1148.403 | 19.41    | 1148.403 | 19.43    | 1148.403 |
| 1148.403 | 19.32    | 1148.403 | 19.4016 | 1148.403 | 19.41158 | 1148.403 | 19.43315 | 1148.403 |
| 1148.403 | 19.32668 | 1148.403 | 19.41   | 1148.403 | 19.42    | 1148.403 | 19.44    | 1148.403 |
| 1148.403 | 19.33    | 1148.403 | 19.4116 | 1148.403 | 19.42158 | 1148.403 | 19.44315 | 1148.403 |
| 1148.403 | 19.33668 | 1148.403 | 19.42   | 1148.403 | 19.43    | 1148.403 | 19.45    | 1148.403 |
| 1148.403 | 19.34    | 1148.403 | 19.4216 | 1148.403 | 19.43158 | 1148.403 | 19.45315 | 1148.403 |
| 1148.403 | 19.34668 | 1148.403 | 19.43   | 1148.403 | 19.44    | 1148.403 | 19.46    | 1148.403 |
| 1148.403 | 19.35    | 1148.403 | 19.4316 | 1148.403 | 19.44158 | 1148.403 | 19.46315 | 1148.403 |
| 1148.403 | 19.35668 | 1148.403 | 19.44   | 1148.403 | 19.45    | 1148.403 | 19.47    | 1148.403 |
| 1148.403 | 19.36    | 1148.403 | 19.4416 | 1148.403 | 19.45158 | 1148.403 | 19.47315 | 1148.403 |
| 1148.403 | 19.36668 | 1148.403 | 19.45   | 1148.403 | 19.46    | 1148.403 | 19.48    | 1148.403 |
| 1148.403 | 19.37    | 1148.403 | 19.4516 | 1148.403 | 19.46158 | 1148.403 | 19.48315 | 1148.403 |
| 1148.403 | 19.37668 | 1148.403 | 19.46   | 1148.403 | 19.47    | 1148.403 | 19.49    | 1148.403 |
| 1148.403 | 19.38    | 1148.403 | 19.4616 | 1148.403 | 19.47158 | 1148.403 | 19.49315 | 1148.403 |
| 1148.403 | 19.38668 | 1148.403 | 19.47   | 1148.403 | 19.48    | 1148.403 | 19.5     | 1148.403 |
| 1148.403 | 19.39    | 1148.403 | 19.4716 | 1148.403 | 19.48158 | 1148.403 | 19.50315 | 1148.403 |
| 1148.403 | 19.39668 | 1148.403 | 19.48   | 1148.403 | 19.49    | 1148.403 | 19.51    | 1148.403 |
| 1148.403 | 19.4     | 1148.403 | 19.4816 | 1148.403 | 19.49158 | 1148.403 | 19.51315 | 1148.403 |
| 1148.403 | 19.40668 | 1148.403 | 19.49   | 1148.403 | 19.5     | 1148.403 | 19.52    | 1148.403 |
| 1148.403 | 19.41    | 1148.403 | 19.4916 | 1148.403 | 19.50158 | 1148.403 | 19.52315 | 1148.403 |
| 1148.403 | 19.41668 | 1148.403 | 19.5    | 1148.403 | 19.51    | 1148.403 | 19.53    | 1148.403 |
| 1148.403 | 19.42    | 1148.403 | 19.5016 | 1148.403 | 19.51158 | 1148.403 | 19.53315 | 1148.403 |
| 1148.403 | 19.42668 | 1148.403 | 19.51   | 1148.403 | 19.52    | 1148.403 | 19.54    | 1148.403 |
| 1148.403 | 19.43    | 1148.403 | 19.5116 | 1148.403 | 19.52158 | 1148.403 | 19.54315 | 1148.403 |
| 1148.403 | 19.43668 | 1148.403 | 19.52   | 1148.403 | 19.53    | 1148.403 | 19.55    | 1148.403 |
| 1148.403 | 19.44    | 1148.403 | 19.5216 | 1148.403 | 19.53158 | 1148.403 | 19.55315 | 1148.403 |
| 1148.403 | 19.44668 | 1148.403 | 19.53   | 1148.403 | 19.54    | 1148.403 | 19.56    | 1148.403 |
| 1148.403 | 19.45    | 1148.403 | 19.5316 | 1148.403 | 19.54158 | 1148.403 | 19.56315 | 1148.403 |
| 1148.403 | 19.45668 | 1148.403 | 19.54   | 1148.403 | 19.55    | 1148.403 | 19.57    | 1148.403 |
| 1148.403 | 19.46    | 1148.403 | 19.5416 | 1148.403 | 19.55158 | 1148.403 | 19.57315 | 1148.403 |
| 1148.403 | 19.46668 | 1148.403 | 19.55   | 1148.403 | 19.56    | 1148.403 | 19.58    | 1148.403 |
| 1148.403 | 19.47    | 1148.403 | 19.5516 | 1148.403 | 19.56158 | 1148.403 | 19.58315 | 1148.403 |

|          |          |          |         |          |          |          |          |          |
|----------|----------|----------|---------|----------|----------|----------|----------|----------|
| 1148.403 | 19.47668 | 1148.403 | 19.56   | 1148.403 | 19.57    | 1148.403 | 19.59    | 1148.403 |
| 1148.403 | 19.48    | 1148.403 | 19.5616 | 1148.403 | 19.57158 | 1148.403 | 19.59315 | 1148.403 |
| 1148.403 | 19.48668 | 1148.403 | 19.57   | 1148.403 | 19.58    | 1148.403 | 19.6     | 1148.403 |
| 1148.403 | 19.49    | 1148.403 | 19.5716 | 1148.403 | 19.58158 | 1148.403 | 19.60315 | 1148.403 |
| 1148.403 | 19.49668 | 1148.403 | 19.58   | 1148.403 | 19.59    | 1148.403 | 19.61    | 1148.403 |
| 1148.403 | 19.5     | 1148.403 | 19.5816 | 1148.403 | 19.59158 | 1148.403 | 19.61315 | 1148.403 |
| 1148.403 | 19.50677 | 1148.403 | 19.59   | 1148.403 | 19.6     | 1148.403 | 19.62    | 1148.403 |
| 1148.403 | 19.51    | 1148.403 | 19.5916 | 1148.403 | 19.60158 | 1148.403 | 19.62315 | 1148.403 |
| 1148.403 | 19.5168  | 1148.403 | 19.6    | 1148.403 | 19.61    | 1148.403 | 19.63    | 1148.403 |
| 1148.403 | 19.52    | 1148.403 | 19.6016 | 1148.403 | 19.61158 | 1148.403 | 19.63315 | 1148.403 |
| 1148.403 | 19.52668 | 1148.403 | 19.61   | 1148.403 | 19.62    | 1148.403 | 19.64    | 1148.403 |
| 1148.403 | 19.53    | 1148.403 | 19.6116 | 1148.403 | 19.62158 | 1148.403 | 19.64315 | 1148.403 |
| 1148.403 | 19.53668 | 1148.403 | 19.62   | 1148.403 | 19.63    | 1148.403 | 19.65    | 1148.403 |
| 1148.403 | 19.54    | 1148.403 | 19.6216 | 1148.403 | 19.63158 | 1148.403 | 19.65315 | 1148.403 |
| 1148.403 | 19.54668 | 1148.403 | 19.63   | 1148.403 | 19.64    | 1148.403 | 19.66    | 1148.403 |
| 1148.403 | 19.55    | 1148.403 | 19.6316 | 1148.403 | 19.64158 | 1148.403 | 19.66315 | 1148.403 |
| 1148.403 | 19.55668 | 1148.403 | 19.64   | 1148.403 | 19.65    | 1148.403 | 19.67    | 1148.403 |
| 1148.403 | 19.56    | 1148.403 | 19.6416 | 1148.403 | 19.65158 | 1148.403 | 19.67315 | 1148.403 |
| 1148.403 | 19.56668 | 1148.403 | 19.65   | 1148.403 | 19.66    | 1148.403 | 19.68    | 1148.403 |
| 1148.403 | 19.57    | 1148.403 | 19.6516 | 1148.403 | 19.66158 | 1148.403 | 19.68315 | 1148.403 |
| 1148.403 | 19.57668 | 1148.403 | 19.66   | 1148.403 | 19.67    | 1148.403 | 19.69    | 1148.403 |
| 1148.403 | 19.58    | 1148.403 | 19.6616 | 1148.403 | 19.67158 | 1148.403 | 19.69315 | 1148.403 |
| 1148.403 | 19.58668 | 1148.403 | 19.67   | 1148.403 | 19.68    | 1148.403 | 19.7     | 1148.403 |
| 1148.403 | 19.59    | 1148.403 | 19.6716 | 1148.403 | 19.68158 | 1148.403 | 19.70315 | 1148.403 |
| 1148.403 | 19.59668 | 1148.403 | 19.68   | 1148.403 | 19.69    | 1148.403 | 19.71    | 1148.403 |
| 1148.403 | 19.6     | 1148.403 | 19.6816 | 1148.403 | 19.69158 | 1148.403 | 19.71315 | 1148.403 |
| 1148.403 | 19.60668 | 1148.403 | 19.69   | 1148.403 | 19.69269 | 1148.403 | 19.72    | 1148.403 |
| 1148.403 | 19.61    | 1148.403 | 19.6916 | 1148.403 | 19.69599 | 1148.403 | 19.72315 | 1148.403 |
| 1148.403 | 19.61668 | 1148.403 | 19.7    | 1148.403 | 19.7     | 1148.403 | 19.73    | 1148.403 |
| 1148.403 | 19.62    | 1148.403 | 19.7016 | 1148.403 | 19.70377 | 1148.403 | 19.73315 | 1148.403 |
| 1148.403 | 19.62668 | 1148.403 | 19.71   | 1148.403 | 19.71    | 1148.403 | 19.74    | 1148.403 |
| 1148.403 | 19.63    | 1148.403 | 19.7116 | 1148.403 | 19.71377 | 1148.403 | 19.74315 | 1148.403 |
| 1148.403 | 19.63668 | 1148.403 | 19.72   | 1148.403 | 19.71546 | 1148.403 | 19.75    | 1148.403 |
| 1148.403 | 19.64    | 1148.403 | 19.7216 | 1148.403 | 19.72    | 1148.403 | 19.75315 | 1148.403 |
| 1148.403 | 19.64668 | 1148.403 | 19.73   | 1148.403 | 19.72148 | 1148.403 | 19.76    | 1148.403 |
| 1148.403 | 19.65    | 1148.403 | 19.7316 | 1148.403 | 19.73    | 1148.403 | 19.76315 | 1148.403 |
| 1148.403 | 19.65668 | 1148.403 | 19.74   | 1148.403 | 19.73148 | 1148.403 | 19.77    | 1148.403 |
| 1148.403 | 19.66    | 1148.403 | 19.7416 | 1148.403 | 19.74    | 1148.403 | 19.77315 | 1148.403 |
| 1148.403 | 19.66668 | 1148.403 | 19.75   | 1148.403 | 19.74148 | 1148.403 | 19.78    | 1148.403 |
| 1148.403 | 19.67    | 1148.403 | 19.7516 | 1148.403 | 19.75    | 1148.403 | 19.78315 | 1148.403 |
| 1148.403 | 19.67668 | 1148.403 | 19.76   | 1148.403 | 19.75148 | 1148.403 | 19.79    | 1148.403 |
| 1148.403 | 19.68    | 1148.403 | 19.7616 | 1148.403 | 19.76    | 1148.403 | 19.79315 | 1148.403 |
| 1148.403 | 19.68668 | 1148.403 | 19.77   | 1148.403 | 19.76148 | 1148.403 | 19.8     | 1148.403 |
| 1148.403 | 19.69    | 1148.403 | 19.7716 | 1148.403 | 19.77    | 1148.403 | 19.80315 | 1148.403 |
| 1148.403 | 19.69668 | 1148.403 | 19.78   | 1148.403 | 19.77148 | 1148.403 | 19.81    | 1148.403 |
| 1148.403 | 19.7     | 1148.403 | 19.7816 | 1148.403 | 19.78    | 1148.403 | 19.81315 | 1148.403 |
| 1148.403 | 19.70668 | 1148.403 | 19.79   | 1148.403 | 19.78148 | 1148.403 | 19.82    | 1148.403 |

|          |          |          |          |          |          |          |          |          |
|----------|----------|----------|----------|----------|----------|----------|----------|----------|
| 1148.403 | 19.71    | 1148.403 | 19.7916  | 1148.403 | 19.79    | 1148.403 | 19.82315 | 1148.403 |
| 1148.403 | 19.71668 | 1148.403 | 19.8     | 1148.403 | 19.79148 | 1148.403 | 19.83    | 1148.403 |
| 1148.403 | 19.72    | 1148.403 | 19.8016  | 1148.403 | 19.8     | 1148.403 | 19.83315 | 1148.403 |
| 1148.403 | 19.72668 | 1148.403 | 19.81    | 1148.403 | 19.80148 | 1148.403 | 19.84    | 1148.403 |
| 1148.403 | 19.73    | 1148.403 | 19.8116  | 1148.403 | 19.81    | 1148.403 | 19.84315 | 1148.403 |
| 1148.403 | 19.73668 | 1148.403 | 19.82    | 1148.403 | 19.81148 | 1148.403 | 19.85    | 1148.403 |
| 1148.403 | 19.74    | 1148.403 | 19.8216  | 1148.403 | 19.82    | 1148.403 | 19.85315 | 1148.403 |
| 1148.403 | 19.74668 | 1148.403 | 19.83    | 1148.403 | 19.82148 | 1148.403 | 19.86    | 1148.403 |
| 1148.403 | 19.75    | 1148.403 | 19.8316  | 1148.403 | 19.83    | 1148.403 | 19.86315 | 1148.403 |
| 1148.403 | 19.75668 | 1148.403 | 19.84    | 1148.403 | 19.83148 | 1148.403 | 19.87    | 1148.403 |
| 1148.403 | 19.76    | 1148.403 | 19.8416  | 1148.403 | 19.84    | 1148.403 | 19.87315 | 1148.403 |
| 1148.403 | 19.76668 | 1148.403 | 19.85    | 1148.403 | 19.84148 | 1148.403 | 19.88    | 1148.403 |
| 1148.403 | 19.77    | 1148.403 | 19.8516  | 1148.403 | 19.85    | 1148.403 | 19.88315 | 1148.403 |
| 1148.403 | 19.77668 | 1148.403 | 19.86    | 1148.403 | 19.85148 | 1148.403 | 19.89    | 1148.403 |
| 1148.403 | 19.78    | 1148.403 | 19.8616  | 1148.403 | 19.86    | 1148.403 | 19.89315 | 1148.403 |
| 1148.403 | 19.78668 | 1148.403 | 19.87    | 1148.403 | 19.86148 | 1148.403 | 19.9     | 1148.403 |
| 1148.403 | 19.79    | 1148.403 | 19.8716  | 1148.403 | 19.87    | 1148.403 | 19.90315 | 1148.403 |
| 1148.403 | 19.79668 | 1148.403 | 19.87568 | 1148.403 | 19.87148 | 1148.403 | 19.91    | 1148.403 |
| 1148.403 | 19.8     | 1148.403 | 19.88    | 1148.403 | 19.88    | 1148.403 | 19.91315 | 1148.403 |
| 1148.403 | 19.80668 | 1148.403 | 19.88337 | 1148.403 | 19.88148 | 1148.403 | 19.92    | 1148.403 |
| 1148.403 | 19.81    | 1148.403 | 19.88734 | 1148.403 | 19.89    | 1148.403 | 19.92315 | 1148.403 |
| 1148.403 | 19.81668 | 1148.403 | 19.89    | 1148.403 | 19.89148 | 1148.403 | 19.93    | 1148.403 |
| 1148.403 | 19.82    | 1148.403 | 19.8939  | 1148.403 | 19.9     | 1148.403 | 19.93315 | 1148.403 |
| 1148.403 | 19.82668 | 1148.403 | 19.89781 | 1148.403 | 19.90148 | 1148.403 | 19.94    | 1148.403 |
| 1148.403 | 19.83    | 1148.403 | 19.9     | 1148.403 | 19.91    | 1148.403 | 19.94315 | 1148.403 |
| 1148.403 | 19.83668 | 1148.403 | 19.90206 | 1148.403 | 19.91148 | 1148.403 | 19.95    | 1148.403 |
| 1148.403 | 19.84    | 1148.403 | 19.91    | 1148.403 | 19.92    | 1148.403 | 19.95315 | 1148.403 |
| 1148.403 | 19.84668 | 1148.403 | 19.91179 | 1148.403 | 19.92148 | 1148.403 | 19.96    | 1148.403 |
| 1148.403 | 19.85    | 1148.403 | 19.92    | 1148.403 | 19.93    | 1148.403 | 19.96315 | 1148.403 |
| 1148.403 | 19.85668 | 1148.403 | 19.92179 | 1148.403 | 19.93148 | 1148.403 | 19.97    | 1148.403 |
| 1148.403 | 19.86    | 1148.403 | 19.93    | 1148.403 | 19.94    | 1148.403 | 19.97315 | 1148.403 |
| 1148.403 | 19.86668 | 1148.403 | 19.93179 | 1148.403 | 19.94148 | 1148.403 | 19.98    | 1148.403 |
| 1148.403 | 19.87    | 1148.403 | 19.94    | 1148.403 | 19.95    | 1148.403 | 19.98315 | 1148.403 |
| 1148.403 | 19.87668 | 1148.403 | 19.94179 | 1148.403 | 19.95148 | 1148.403 | 19.99    | 1148.403 |
| 1148.403 | 19.88    | 1148.403 | 19.95    | 1148.403 | 19.96    | 1148.403 | 19.99315 | 1148.403 |
| 1148.403 | 19.88663 | 1148.403 | 19.95179 | 1148.403 | 19.96148 | 1148.403 | 20       | 1148.403 |
| 1148.403 | 19.89    | 1148.403 | 19.96    | 1148.403 | 19.97    | 1148.403 |          |          |
| 1148.403 | 19.89674 | 1148.403 | 19.96179 | 1148.403 | 19.97148 | 1148.403 |          |          |
| 1148.403 | 19.9     | 1148.403 | 19.96326 | 1148.403 | 19.98    | 1148.403 |          |          |
| 1148.403 | 19.90662 | 1148.403 | 19.97    | 1148.403 | 19.98148 | 1148.403 |          |          |
| 1148.403 | 19.91    | 1148.403 | 19.97127 | 1148.403 | 19.99    | 1148.403 |          |          |
| 1148.403 | 19.91662 | 1148.403 | 19.97368 | 1148.403 | 19.99148 | 1148.403 |          |          |
| 1148.403 | 19.92    | 1148.403 | 19.98    | 1148.403 | 20       | 1148.403 |          |          |
| 1148.403 | 19.92662 | 1148.403 | 19.98232 | 1148.403 |          |          |          |          |
| 1148.403 | 19.93    | 1148.403 | 19.9847  | 1148.403 |          |          |          |          |
| 1148.403 | 19.93662 | 1148.403 | 19.99    | 1148.403 |          |          |          |          |
|          | 19.94    | 1148.403 | 19.99203 | 1148.403 |          |          |          |          |

|          |          |    |          |
|----------|----------|----|----------|
| 19.94662 | 1148.403 | 20 | 1148.403 |
| 19.95    | 1148.403 |    |          |
| 19.95662 | 1148.403 |    |          |
| 19.96    | 1148.403 |    |          |
| 19.96662 | 1148.403 |    |          |
| 19.97    | 1148.403 |    |          |
| 19.97662 | 1148.403 |    |          |
| 19.98    | 1148.403 |    |          |
| 19.98662 | 1148.403 |    |          |
| 19.99    | 1148.403 |    |          |
| 19.99662 | 1148.403 |    |          |
| 20       | 1148.403 |    |          |





|          |         |          |         |          |         |          |         |          |
|----------|---------|----------|---------|----------|---------|----------|---------|----------|
| L6:9.90s |         | L6:9.00s |         | L6:9.00s |         | L6:9.50s |         | L6:9.50s |
| L7:9.00s |         | L7:9.50s |         | L7:9.90s |         | L7:9.00s |         | L7:9.50s |
| t        | J3.om   | t        | J3.om   | t        | J3.om   | t        | J3.om   | t        |
| s        | rpm     | s        | rpm     | s        | rpm     | s        | rpm     | s        |
| 0        | 1152.51 | 0        | 1152.51 | 0        | 1152.51 | 0        | 1152.51 | 0        |
| 0.006678 | 1152.51 | 0.006678 | 1152.51 | 0.006678 | 1152.51 | 0.006678 | 1152.51 | 0.006678 |
| 0.01     | 1152.51 | 0.01     | 1152.51 | 0.01     | 1152.51 | 0.01     | 1152.51 | 0.01     |
| 0.016678 | 1152.51 | 0.016678 | 1152.51 | 0.016678 | 1152.51 | 0.016678 | 1152.51 | 0.016678 |
| 0.02     | 1152.51 | 0.02     | 1152.51 | 0.02     | 1152.51 | 0.02     | 1152.51 | 0.02     |
| 0.026678 | 1152.51 | 0.026678 | 1152.51 | 0.026678 | 1152.51 | 0.026678 | 1152.51 | 0.026678 |
| 0.03     | 1152.51 | 0.03     | 1152.51 | 0.03     | 1152.51 | 0.03     | 1152.51 | 0.03     |
| 0.036678 | 1152.51 | 0.036678 | 1152.51 | 0.036678 | 1152.51 | 0.036678 | 1152.51 | 0.036678 |
| 0.04     | 1152.51 | 0.04     | 1152.51 | 0.04     | 1152.51 | 0.04     | 1152.51 | 0.04     |
| 0.046678 | 1152.51 | 0.046678 | 1152.51 | 0.046678 | 1152.51 | 0.046678 | 1152.51 | 0.046678 |
| 0.05     | 1152.51 | 0.05     | 1152.51 | 0.05     | 1152.51 | 0.05     | 1152.51 | 0.05     |
| 0.056678 | 1152.51 | 0.056678 | 1152.51 | 0.056678 | 1152.51 | 0.056678 | 1152.51 | 0.056678 |
| 0.06     | 1152.51 | 0.06     | 1152.51 | 0.06     | 1152.51 | 0.06     | 1152.51 | 0.06     |
| 0.066678 | 1152.51 | 0.066678 | 1152.51 | 0.066678 | 1152.51 | 0.066678 | 1152.51 | 0.066678 |
| 0.07     | 1152.51 | 0.07     | 1152.51 | 0.07     | 1152.51 | 0.07     | 1152.51 | 0.07     |
| 0.076678 | 1152.51 | 0.076678 | 1152.51 | 0.076678 | 1152.51 | 0.076678 | 1152.51 | 0.076678 |
| 0.08     | 1152.51 | 0.08     | 1152.51 | 0.08     | 1152.51 | 0.08     | 1152.51 | 0.08     |
| 0.086678 | 1152.51 | 0.086678 | 1152.51 | 0.086678 | 1152.51 | 0.086678 | 1152.51 | 0.086678 |
| 0.09     | 1152.51 | 0.09     | 1152.51 | 0.09     | 1152.51 | 0.09     | 1152.51 | 0.09     |
| 0.096678 | 1152.51 | 0.096678 | 1152.51 | 0.096678 | 1152.51 | 0.096678 | 1152.51 | 0.096678 |
| 0.1      | 1152.51 | 0.1      | 1152.51 | 0.1      | 1152.51 | 0.1      | 1152.51 | 0.1      |
| 0.106678 | 1152.51 | 0.106678 | 1152.51 | 0.106678 | 1152.51 | 0.106678 | 1152.51 | 0.106678 |
| 0.11     | 1152.51 | 0.11     | 1152.51 | 0.11     | 1152.51 | 0.11     | 1152.51 | 0.11     |
| 0.116678 | 1152.51 | 0.116678 | 1152.51 | 0.116678 | 1152.51 | 0.116678 | 1152.51 | 0.116678 |
| 0.12     | 1152.51 | 0.12     | 1152.51 | 0.12     | 1152.51 | 0.12     | 1152.51 | 0.12     |
| 0.126678 | 1152.51 | 0.126678 | 1152.51 | 0.126678 | 1152.51 | 0.126678 | 1152.51 | 0.126678 |
| 0.13     | 1152.51 | 0.13     | 1152.51 | 0.13     | 1152.51 | 0.13     | 1152.51 | 0.13     |
| 0.136678 | 1152.51 | 0.136678 | 1152.51 | 0.136678 | 1152.51 | 0.136678 | 1152.51 | 0.136678 |
| 0.14     | 1152.51 | 0.14     | 1152.51 | 0.14     | 1152.51 | 0.14     | 1152.51 | 0.14     |
| 0.146678 | 1152.51 | 0.146678 | 1152.51 | 0.146678 | 1152.51 | 0.146678 | 1152.51 | 0.146678 |
| 0.15     | 1152.51 | 0.15     | 1152.51 | 0.15     | 1152.51 | 0.15     | 1152.51 | 0.15     |
| 0.156678 | 1152.51 | 0.156678 | 1152.51 | 0.156678 | 1152.51 | 0.156678 | 1152.51 | 0.156678 |
| 0.16     | 1152.51 | 0.16     | 1152.51 | 0.16     | 1152.51 | 0.16     | 1152.51 | 0.16     |
| 0.166678 | 1152.51 | 0.166678 | 1152.51 | 0.166678 | 1152.51 | 0.166678 | 1152.51 | 0.166678 |
| 0.17     | 1152.51 | 0.17     | 1152.51 | 0.17     | 1152.51 | 0.17     | 1152.51 | 0.17     |
| 0.176678 | 1152.51 | 0.176678 | 1152.51 | 0.176678 | 1152.51 | 0.176678 | 1152.51 | 0.176678 |
| 0.18     | 1152.51 | 0.18     | 1152.51 | 0.18     | 1152.51 | 0.18     | 1152.51 | 0.18     |
| 0.186678 | 1152.51 | 0.186678 | 1152.51 | 0.186678 | 1152.51 | 0.186678 | 1152.51 | 0.186678 |
| 0.19     | 1152.51 | 0.19     | 1152.51 | 0.19     | 1152.51 | 0.19     | 1152.51 | 0.19     |
| 0.196678 | 1152.51 | 0.196678 | 1152.51 | 0.196678 | 1152.51 | 0.196678 | 1152.51 | 0.196678 |
| 0.2      | 1152.51 | 0.2      | 1152.51 | 0.2      | 1152.51 | 0.2      | 1152.51 | 0.2      |
| 0.206678 | 1152.51 | 0.206678 | 1152.51 | 0.206678 | 1152.51 | 0.206678 | 1152.51 | 0.206678 |
| 0.21     | 1152.51 | 0.21     | 1152.51 | 0.21     | 1152.51 | 0.21     | 1152.51 | 0.21     |

|          |         |          |         |          |         |          |         |          |
|----------|---------|----------|---------|----------|---------|----------|---------|----------|
| 0.216678 | 1152.51 | 0.216678 | 1152.51 | 0.216678 | 1152.51 | 0.216678 | 1152.51 | 0.216678 |
| 0.22     | 1152.51 | 0.22     | 1152.51 | 0.22     | 1152.51 | 0.22     | 1152.51 | 0.22     |
| 0.226678 | 1152.51 | 0.226678 | 1152.51 | 0.226678 | 1152.51 | 0.226678 | 1152.51 | 0.226678 |
| 0.23     | 1152.51 | 0.23     | 1152.51 | 0.23     | 1152.51 | 0.23     | 1152.51 | 0.23     |
| 0.236678 | 1152.51 | 0.236678 | 1152.51 | 0.236678 | 1152.51 | 0.236678 | 1152.51 | 0.236678 |
| 0.24     | 1152.51 | 0.24     | 1152.51 | 0.24     | 1152.51 | 0.24     | 1152.51 | 0.24     |
| 0.246678 | 1152.51 | 0.246678 | 1152.51 | 0.246678 | 1152.51 | 0.246678 | 1152.51 | 0.246678 |
| 0.25     | 1152.51 | 0.25     | 1152.51 | 0.25     | 1152.51 | 0.25     | 1152.51 | 0.25     |
| 0.256678 | 1152.51 | 0.256678 | 1152.51 | 0.256678 | 1152.51 | 0.256678 | 1152.51 | 0.256678 |
| 0.26     | 1152.51 | 0.26     | 1152.51 | 0.26     | 1152.51 | 0.26     | 1152.51 | 0.26     |
| 0.266678 | 1152.51 | 0.266678 | 1152.51 | 0.266678 | 1152.51 | 0.266678 | 1152.51 | 0.266678 |
| 0.27     | 1152.51 | 0.27     | 1152.51 | 0.27     | 1152.51 | 0.27     | 1152.51 | 0.27     |
| 0.276678 | 1152.51 | 0.276678 | 1152.51 | 0.276678 | 1152.51 | 0.276678 | 1152.51 | 0.276678 |
| 0.28     | 1152.51 | 0.28     | 1152.51 | 0.28     | 1152.51 | 0.28     | 1152.51 | 0.28     |
| 0.286678 | 1152.51 | 0.286678 | 1152.51 | 0.286678 | 1152.51 | 0.286678 | 1152.51 | 0.286678 |
| 0.29     | 1152.51 | 0.29     | 1152.51 | 0.29     | 1152.51 | 0.29     | 1152.51 | 0.29     |
| 0.296678 | 1152.51 | 0.296678 | 1152.51 | 0.296678 | 1152.51 | 0.296678 | 1152.51 | 0.296678 |
| 0.3      | 1152.51 | 0.3      | 1152.51 | 0.3      | 1152.51 | 0.3      | 1152.51 | 0.3      |
| 0.306678 | 1152.51 | 0.306678 | 1152.51 | 0.306678 | 1152.51 | 0.306678 | 1152.51 | 0.306678 |
| 0.31     | 1152.51 | 0.31     | 1152.51 | 0.31     | 1152.51 | 0.31     | 1152.51 | 0.31     |
| 0.316678 | 1152.51 | 0.316678 | 1152.51 | 0.316678 | 1152.51 | 0.316678 | 1152.51 | 0.316678 |
| 0.32     | 1152.51 | 0.32     | 1152.51 | 0.32     | 1152.51 | 0.32     | 1152.51 | 0.32     |
| 0.326678 | 1152.51 | 0.326678 | 1152.51 | 0.326678 | 1152.51 | 0.326678 | 1152.51 | 0.326678 |
| 0.33     | 1152.51 | 0.33     | 1152.51 | 0.33     | 1152.51 | 0.33     | 1152.51 | 0.33     |
| 0.336678 | 1152.51 | 0.336678 | 1152.51 | 0.336678 | 1152.51 | 0.336678 | 1152.51 | 0.336678 |
| 0.34     | 1152.51 | 0.34     | 1152.51 | 0.34     | 1152.51 | 0.34     | 1152.51 | 0.34     |
| 0.346678 | 1152.51 | 0.346678 | 1152.51 | 0.346678 | 1152.51 | 0.346678 | 1152.51 | 0.346678 |
| 0.35     | 1152.51 | 0.35     | 1152.51 | 0.35     | 1152.51 | 0.35     | 1152.51 | 0.35     |
| 0.356678 | 1152.51 | 0.356678 | 1152.51 | 0.356678 | 1152.51 | 0.356678 | 1152.51 | 0.356678 |
| 0.36     | 1152.51 | 0.36     | 1152.51 | 0.36     | 1152.51 | 0.36     | 1152.51 | 0.36     |
| 0.366678 | 1152.51 | 0.366678 | 1152.51 | 0.366678 | 1152.51 | 0.366678 | 1152.51 | 0.366678 |
| 0.37     | 1152.51 | 0.37     | 1152.51 | 0.37     | 1152.51 | 0.37     | 1152.51 | 0.37     |
| 0.376678 | 1152.51 | 0.376678 | 1152.51 | 0.376678 | 1152.51 | 0.376678 | 1152.51 | 0.376678 |
| 0.38     | 1152.51 | 0.38     | 1152.51 | 0.38     | 1152.51 | 0.38     | 1152.51 | 0.38     |
| 0.386678 | 1152.51 | 0.386678 | 1152.51 | 0.386678 | 1152.51 | 0.386678 | 1152.51 | 0.386678 |
| 0.39     | 1152.51 | 0.39     | 1152.51 | 0.39     | 1152.51 | 0.39     | 1152.51 | 0.39     |
| 0.396678 | 1152.51 | 0.396678 | 1152.51 | 0.396678 | 1152.51 | 0.396678 | 1152.51 | 0.396678 |
| 0.4      | 1152.51 | 0.4      | 1152.51 | 0.4      | 1152.51 | 0.4      | 1152.51 | 0.4      |
| 0.406678 | 1152.51 | 0.406678 | 1152.51 | 0.406678 | 1152.51 | 0.406678 | 1152.51 | 0.406678 |
| 0.41     | 1152.51 | 0.41     | 1152.51 | 0.41     | 1152.51 | 0.41     | 1152.51 | 0.41     |
| 0.416678 | 1152.51 | 0.416678 | 1152.51 | 0.416678 | 1152.51 | 0.416678 | 1152.51 | 0.416678 |
| 0.42     | 1152.51 | 0.42     | 1152.51 | 0.42     | 1152.51 | 0.42     | 1152.51 | 0.42     |
| 0.426678 | 1152.51 | 0.426678 | 1152.51 | 0.426678 | 1152.51 | 0.426678 | 1152.51 | 0.426678 |
| 0.43     | 1152.51 | 0.43     | 1152.51 | 0.43     | 1152.51 | 0.43     | 1152.51 | 0.43     |
| 0.436678 | 1152.51 | 0.436678 | 1152.51 | 0.436678 | 1152.51 | 0.436678 | 1152.51 | 0.436678 |
| 0.44     | 1152.51 | 0.44     | 1152.51 | 0.44     | 1152.51 | 0.44     | 1152.51 | 0.44     |
| 0.446678 | 1152.51 | 0.446678 | 1152.51 | 0.446678 | 1152.51 | 0.446678 | 1152.51 | 0.446678 |

|          |         |          |         |          |         |          |         |          |
|----------|---------|----------|---------|----------|---------|----------|---------|----------|
| 0.45     | 1152.51 | 0.45     | 1152.51 | 0.45     | 1152.51 | 0.45     | 1152.51 | 0.45     |
| 0.456678 | 1152.51 | 0.456678 | 1152.51 | 0.456678 | 1152.51 | 0.456678 | 1152.51 | 0.456678 |
| 0.46     | 1152.51 | 0.46     | 1152.51 | 0.46     | 1152.51 | 0.46     | 1152.51 | 0.46     |
| 0.466678 | 1152.51 | 0.466678 | 1152.51 | 0.466678 | 1152.51 | 0.466678 | 1152.51 | 0.466678 |
| 0.47     | 1152.51 | 0.47     | 1152.51 | 0.47     | 1152.51 | 0.47     | 1152.51 | 0.47     |
| 0.476678 | 1152.51 | 0.476678 | 1152.51 | 0.476678 | 1152.51 | 0.476678 | 1152.51 | 0.476678 |
| 0.48     | 1152.51 | 0.48     | 1152.51 | 0.48     | 1152.51 | 0.48     | 1152.51 | 0.48     |
| 0.486678 | 1152.51 | 0.486678 | 1152.51 | 0.486678 | 1152.51 | 0.486678 | 1152.51 | 0.486678 |
| 0.49     | 1152.51 | 0.49     | 1152.51 | 0.49     | 1152.51 | 0.49     | 1152.51 | 0.49     |
| 0.496678 | 1152.51 | 0.496678 | 1152.51 | 0.496678 | 1152.51 | 0.496678 | 1152.51 | 0.496678 |
| 0.5      | 1152.51 | 0.5      | 1152.51 | 0.5      | 1152.51 | 0.5      | 1152.51 | 0.5      |
| 0.506678 | 1152.51 | 0.506678 | 1152.51 | 0.506678 | 1152.51 | 0.506678 | 1152.51 | 0.506678 |
| 0.51     | 1152.51 | 0.51     | 1152.51 | 0.51     | 1152.51 | 0.51     | 1152.51 | 0.51     |
| 0.516678 | 1152.51 | 0.516678 | 1152.51 | 0.516678 | 1152.51 | 0.516678 | 1152.51 | 0.516678 |
| 0.52     | 1152.51 | 0.52     | 1152.51 | 0.52     | 1152.51 | 0.52     | 1152.51 | 0.52     |
| 0.526678 | 1152.51 | 0.526678 | 1152.51 | 0.526678 | 1152.51 | 0.526678 | 1152.51 | 0.526678 |
| 0.53     | 1152.51 | 0.53     | 1152.51 | 0.53     | 1152.51 | 0.53     | 1152.51 | 0.53     |
| 0.536678 | 1152.51 | 0.536678 | 1152.51 | 0.536678 | 1152.51 | 0.536678 | 1152.51 | 0.536678 |
| 0.54     | 1152.51 | 0.54     | 1152.51 | 0.54     | 1152.51 | 0.54     | 1152.51 | 0.54     |
| 0.546678 | 1152.51 | 0.546678 | 1152.51 | 0.546678 | 1152.51 | 0.546678 | 1152.51 | 0.546678 |
| 0.55     | 1152.51 | 0.55     | 1152.51 | 0.55     | 1152.51 | 0.55     | 1152.51 | 0.55     |
| 0.556678 | 1152.51 | 0.556678 | 1152.51 | 0.556678 | 1152.51 | 0.556678 | 1152.51 | 0.556678 |
| 0.56     | 1152.51 | 0.56     | 1152.51 | 0.56     | 1152.51 | 0.56     | 1152.51 | 0.56     |
| 0.566678 | 1152.51 | 0.566678 | 1152.51 | 0.566678 | 1152.51 | 0.566678 | 1152.51 | 0.566678 |
| 0.57     | 1152.51 | 0.57     | 1152.51 | 0.57     | 1152.51 | 0.57     | 1152.51 | 0.57     |
| 0.576678 | 1152.51 | 0.576678 | 1152.51 | 0.576678 | 1152.51 | 0.576678 | 1152.51 | 0.576678 |
| 0.58     | 1152.51 | 0.58     | 1152.51 | 0.58     | 1152.51 | 0.58     | 1152.51 | 0.58     |
| 0.586678 | 1152.51 | 0.586678 | 1152.51 | 0.586678 | 1152.51 | 0.586678 | 1152.51 | 0.586678 |
| 0.59     | 1152.51 | 0.59     | 1152.51 | 0.59     | 1152.51 | 0.59     | 1152.51 | 0.59     |
| 0.596678 | 1152.51 | 0.596678 | 1152.51 | 0.596678 | 1152.51 | 0.596678 | 1152.51 | 0.596678 |
| 0.6      | 1152.51 | 0.6      | 1152.51 | 0.6      | 1152.51 | 0.6      | 1152.51 | 0.6      |
| 0.606678 | 1152.51 | 0.606678 | 1152.51 | 0.606678 | 1152.51 | 0.606678 | 1152.51 | 0.606678 |
| 0.61     | 1152.51 | 0.61     | 1152.51 | 0.61     | 1152.51 | 0.61     | 1152.51 | 0.61     |
| 0.616678 | 1152.51 | 0.616678 | 1152.51 | 0.616678 | 1152.51 | 0.616678 | 1152.51 | 0.616678 |
| 0.62     | 1152.51 | 0.62     | 1152.51 | 0.62     | 1152.51 | 0.62     | 1152.51 | 0.62     |
| 0.626678 | 1152.51 | 0.626678 | 1152.51 | 0.626678 | 1152.51 | 0.626678 | 1152.51 | 0.626678 |
| 0.63     | 1152.51 | 0.63     | 1152.51 | 0.63     | 1152.51 | 0.63     | 1152.51 | 0.63     |
| 0.636678 | 1152.51 | 0.636678 | 1152.51 | 0.636678 | 1152.51 | 0.636678 | 1152.51 | 0.636678 |
| 0.64     | 1152.51 | 0.64     | 1152    |          |         |          |         |          |

|          |         |          |         |          |         |          |         |          |
|----------|---------|----------|---------|----------|---------|----------|---------|----------|
| 0.686678 | 1152.51 | 0.686678 | 1152.51 | 0.686678 | 1152.51 | 0.686678 | 1152.51 | 0.686678 |
| 0.69     | 1152.51 | 0.69     | 1152.51 | 0.69     | 1152.51 | 0.69     | 1152.51 | 0.69     |
| 0.696678 | 1152.51 | 0.696678 | 1152.51 | 0.696678 | 1152.51 | 0.696678 | 1152.51 | 0.696678 |
| 0.7      | 1152.51 | 0.7      | 1152.51 | 0.7      | 1152.51 | 0.7      | 1152.51 | 0.7      |
| 0.706678 | 1152.51 | 0.706678 | 1152.51 | 0.706678 | 1152.51 | 0.706678 | 1152.51 | 0.706678 |
| 0.71     | 1152.51 | 0.71     | 1152.51 | 0.71     | 1152.51 | 0.71     | 1152.51 | 0.71     |
| 0.716678 | 1152.51 | 0.716678 | 1152.51 | 0.716678 | 1152.51 | 0.716678 | 1152.51 | 0.716678 |
| 0.72     | 1152.51 | 0.72     | 1152.51 | 0.72     | 1152.51 | 0.72     | 1152.51 | 0.72     |
| 0.726678 | 1152.51 | 0.726678 | 1152.51 | 0.726678 | 1152.51 | 0.726678 | 1152.51 | 0.726678 |
| 0.73     | 1152.51 | 0.73     | 1152.51 | 0.73     | 1152.51 | 0.73     | 1152.51 | 0.73     |
| 0.736678 | 1152.51 | 0.736678 | 1152.51 | 0.736678 | 1152.51 | 0.736678 | 1152.51 | 0.736678 |
| 0.74     | 1152.51 | 0.74     | 1152.51 | 0.74     | 1152.51 | 0.74     | 1152.51 | 0.74     |
| 0.746678 | 1152.51 | 0.746678 | 1152.51 | 0.746678 | 1152.51 | 0.746678 | 1152.51 | 0.746678 |
| 0.75     | 1152.51 | 0.75     | 1152.51 | 0.75     | 1152.51 | 0.75     | 1152.51 | 0.75     |
| 0.756678 | 1152.51 | 0.756678 | 1152.51 | 0.756678 | 1152.51 | 0.756678 | 1152.51 | 0.756678 |
| 0.76     | 1152.51 | 0.76     | 1152.51 | 0.76     | 1152.51 | 0.76     | 1152.51 | 0.76     |
| 0.766678 | 1152.51 | 0.766678 | 1152.51 | 0.766678 | 1152.51 | 0.766678 | 1152.51 | 0.766678 |
| 0.77     | 1152.51 | 0.77     | 1152.51 | 0.77     | 1152.51 | 0.77     | 1152.51 | 0.77     |
| 0.776678 | 1152.51 | 0.776678 | 1152.51 | 0.776678 | 1152.51 | 0.776678 | 1152.51 | 0.776678 |
| 0.78     | 1152.51 | 0.78     | 1152.51 | 0.78     | 1152.51 | 0.78     | 1152.51 | 0.78     |
| 0.786678 | 1152.51 | 0.786678 | 1152.51 | 0.786678 | 1152.51 | 0.786678 | 1152.51 | 0.786678 |
| 0.79     | 1152.51 | 0.79     | 1152.51 | 0.79     | 1152.51 | 0.79     | 1152.51 | 0.79     |
| 0.796678 | 1152.51 | 0.796678 | 1152.51 | 0.796678 | 1152.51 | 0.796678 | 1152.51 | 0.796678 |
| 0.8      | 1152.51 | 0.8      | 1152.51 | 0.8      | 1152.51 | 0.8      | 1152.51 | 0.8      |
| 0.806678 | 1152.51 | 0.806678 | 1152.51 | 0.806678 | 1152.51 | 0.806678 | 1152.51 | 0.806678 |
| 0.81     | 1152.51 | 0.81     | 1152.51 | 0.81     | 1152.51 | 0.81     | 1152.51 | 0.81     |
| 0.816678 | 1152.51 | 0.816678 | 1152.51 | 0.816678 | 1152.51 | 0.816678 | 1152.51 | 0.816678 |
| 0.82     | 1152.51 | 0.82     | 1152.51 | 0.82     | 1152.51 | 0.82     | 1152.51 | 0.82     |
| 0.826678 | 1152.51 | 0.826678 | 1152.51 | 0.826678 | 1152.51 | 0.826678 | 1152.51 | 0.826678 |
| 0.83     | 1152.51 | 0.83     | 1152.51 | 0.83     | 1152.51 | 0.83     | 1152.51 | 0.83     |
| 0.836678 | 1152.51 | 0.836678 | 1152.51 | 0.836678 | 1152.51 | 0.836678 | 1152.51 | 0.836678 |
| 0.84     | 1152.51 | 0.84     | 1152.51 | 0.84     | 1152.51 | 0.84     | 1152.51 | 0.84     |
| 0.846678 | 1152.51 | 0.846678 | 1152.51 | 0.846678 | 1152.51 | 0.846678 | 1152.51 | 0.846678 |
| 0.85     | 1152.51 | 0.85     | 1152.51 | 0.85     | 1152.51 | 0.85     | 1152.51 | 0.85     |
| 0.856678 | 1152.51 | 0.856678 | 1152.51 | 0.856678 | 1152.51 | 0.856678 | 1152.51 | 0.856678 |
| 0.86     | 1152.51 | 0.86     | 1152.51 | 0.86     | 1152.51 | 0.86     | 1152.51 | 0.86     |
| 0.866678 | 1152.51 | 0.866678 | 1152.51 | 0.866678 | 1152.51 | 0.866678 | 1152.51 | 0.866678 |
| 0.87     | 1152.51 | 0.87     | 1152.51 | 0.87     | 1152.51 | 0.87     | 1152.51 | 0.87     |
| 0.876678 | 1152.51 | 0.876678 | 1152.51 | 0.876678 | 1152.51 | 0.876678 | 1152.51 | 0.876678 |
| 0.88     | 1152.51 | 0.88     | 1152.51 | 0.88     | 1152.51 | 0.88     | 1152.51 | 0.88     |
| 0.886678 | 1152.51 | 0.886678 | 1152.51 | 0.886678 | 1152.51 | 0.886678 | 1152.51 | 0.886678 |
| 0.89     | 1152.51 | 0.89     | 1152.51 | 0.89     | 1152.51 | 0.89     | 1152.51 | 0.89     |
| 0.896678 | 1152.51 | 0.896678 | 1152.51 | 0.896678 | 1152.51 | 0.896678 | 1152.51 | 0.896678 |
| 0.9      | 1152.51 | 0.9      | 1152.51 | 0.9      | 1152.51 | 0.9      | 1152.51 | 0.9      |
| 0.906678 | 1152.51 | 0.906678 | 1152.51 | 0.906678 | 1152.51 | 0.906678 | 1152.51 | 0.906678 |
| 0.91     | 1152.51 | 0.91     | 1152.51 | 0.91     | 1152.51 | 0.91     | 1152.51 | 0.91     |
| 0.916678 | 1152.51 | 0.916678 | 1152.51 | 0.916678 | 1152.51 | 0.916678 | 1152.51 | 0.916678 |

|          |         |          |         |          |         |          |         |          |
|----------|---------|----------|---------|----------|---------|----------|---------|----------|
| 0.92     | 1152.51 | 0.92     | 1152.51 | 0.92     | 1152.51 | 0.92     | 1152.51 | 0.92     |
| 0.926678 | 1152.51 | 0.926678 | 1152.51 | 0.926678 | 1152.51 | 0.926678 | 1152.51 | 0.926678 |
| 0.93     | 1152.51 | 0.93     | 1152.51 | 0.93     | 1152.51 | 0.93     | 1152.51 | 0.93     |
| 0.936678 | 1152.51 | 0.936678 | 1152.51 | 0.936678 | 1152.51 | 0.936678 | 1152.51 | 0.936678 |
| 0.94     | 1152.51 | 0.94     | 1152.51 | 0.94     | 1152.51 | 0.94     | 1152.51 | 0.94     |
| 0.946678 | 1152.51 | 0.946678 | 1152.51 | 0.946678 | 1152.51 | 0.946678 | 1152.51 | 0.946678 |
| 0.95     | 1152.51 | 0.95     | 1152.51 | 0.95     | 1152.51 | 0.95     | 1152.51 | 0.95     |
| 0.956678 | 1152.51 | 0.956678 | 1152.51 | 0.956678 | 1152.51 | 0.956678 | 1152.51 | 0.956678 |
| 0.96     | 1152.51 | 0.96     | 1152.51 | 0.96     | 1152.51 | 0.96     | 1152.51 | 0.96     |
| 0.966678 | 1152.51 | 0.966678 | 1152.51 | 0.966678 | 1152.51 | 0.966678 | 1152.51 | 0.966678 |
| 0.97     | 1152.51 | 0.97     | 1152.51 | 0.97     | 1152.51 | 0.97     | 1152.51 | 0.97     |
| 0.976678 | 1152.51 | 0.976678 | 1152.51 | 0.976678 | 1152.51 | 0.976678 | 1152.51 | 0.976678 |
| 0.98     | 1152.51 | 0.98     | 1152.51 | 0.98     | 1152.51 | 0.98     | 1152.51 | 0.98     |
| 0.986678 | 1152.51 | 0.986678 | 1152.51 | 0.986678 | 1152.51 | 0.986678 | 1152.51 | 0.986678 |
| 0.99     | 1152.51 | 0.99     | 1152.51 | 0.99     | 1152.51 | 0.99     | 1152.51 | 0.99     |
| 0.996678 | 1152.51 | 0.996678 | 1152.51 | 0.996678 | 1152.51 | 0.996678 | 1152.51 | 0.996678 |
| 1        | 1152.51 | 1        | 1152.51 | 1        | 1152.51 | 1        | 1152.51 | 1        |
| 1.006678 | 1152.51 | 1.006678 | 1152.51 | 1.006678 | 1152.51 | 1.006678 | 1152.51 | 1.006678 |
| 1.01     | 1152.51 | 1.01     | 1152.51 | 1.01     | 1152.51 | 1.01     | 1152.51 | 1.01     |
| 1.016678 | 1152.51 | 1.016678 | 1152.51 | 1.016678 | 1152.51 | 1.016678 | 1152.51 | 1.016678 |
| 1.02     | 1152.51 | 1.02     | 1152.51 | 1.02     | 1152.51 | 1.02     | 1152.51 | 1.02     |
| 1.026678 | 1152.51 | 1.026678 | 1152.51 | 1.026678 | 1152.51 | 1.026678 | 1152.51 | 1.026678 |
| 1.03     | 1152.51 | 1.03     | 1152.51 | 1.03     | 1152.51 | 1.03     | 1152.51 | 1.03     |
| 1.036678 | 1152.51 | 1.036678 | 1152.51 | 1.036678 | 1152.51 | 1.036678 | 1152.51 | 1.036678 |
| 1.04     | 1152.51 | 1.04     | 1152.51 | 1.04     | 1152.51 | 1.04     | 1152.51 | 1.04     |
| 1.046678 | 1152.51 | 1.046678 | 1152.51 | 1.046678 | 1152.51 | 1.046678 | 1152.51 | 1.046678 |
| 1.05     | 1152.51 | 1.05     | 1152.51 | 1.05     | 1152.51 | 1.05     | 1152.51 | 1.05     |
| 1.056678 | 1152.51 | 1.056678 | 1152.51 | 1.056678 | 1152.51 | 1.056678 | 1152.51 | 1.056678 |
| 1.06     | 1152.51 | 1.06     | 1152.51 | 1.06     | 1152.51 | 1.06     | 1152.51 | 1.06     |
| 1.066678 | 1152.51 | 1.066678 | 1152.51 | 1.066678 | 1152.51 | 1.066678 | 1152.51 | 1.066678 |
| 1.07     | 1152.51 | 1.07     | 1152.51 | 1.07     | 1152.51 | 1.07     | 1152.51 | 1.07     |
| 1.076678 | 1152.51 | 1.076678 | 1152.51 | 1.076678 | 1152.51 | 1.076678 | 1152.51 | 1.076678 |
| 1.08     | 1152.51 | 1.08     | 1152.51 | 1.08     | 1152.51 | 1.08     | 1152.51 | 1.08     |
| 1.086678 | 1152.51 | 1.086678 | 1152.51 | 1.086678 | 1152.51 | 1.086678 | 1152.51 | 1.086678 |
| 1.09     | 1152.51 | 1.09     | 1152.51 | 1.09     | 1152.51 | 1.09     | 1152.51 | 1.09     |
| 1.096678 | 1152.51 | 1.096678 | 1152.51 | 1.096678 | 1152.51 | 1.096678 | 1152.51 | 1.096678 |
| 1.1      | 1152.51 | 1.1      | 1152.51 | 1.1      | 1152.51 | 1.1      | 1152.51 | 1.1      |
| 1.106678 | 1152.51 | 1.106678 | 1152.51 | 1.106678 | 1152.51 | 1.106678 | 1152.51 | 1.106678 |
| 1.11     | 1152.51 | 1.11     | 1152.51 | 1.11     | 1152.51 | 1.11     | 1152.51 | 1.11     |
| 1.116678 | 1152.51 | 1.116678 | 1152.51 | 1.116678 | 1152.51 | 1.116678 | 1152.51 | 1.116678 |
| 1.12     | 1152.51 | 1.12     | 1152.51 | 1.12     | 1152.51 | 1.12     | 1152.51 | 1.12     |
| 1.126678 | 1152.51 | 1.126678 | 1152.51 | 1.126678 | 1152.51 | 1.126678 | 1152.51 | 1.126678 |
| 1.13     | 1152.51 | 1.13     | 1152.51 | 1.13     | 1152.51 | 1.13     | 1152.51 | 1.13     |
| 1.136678 | 1152.51 | 1.136678 | 1152.51 | 1.136678 | 1152.51 | 1.136678 | 1152.51 | 1.136678 |
| 1.14     | 1152.51 | 1.14     | 1152.51 | 1.14     | 1152.51 | 1.14     | 1152.51 | 1.14     |
| 1.146678 | 1152.51 | 1.146678 | 1152.51 | 1.146678 | 1152.51 | 1.146678 | 1152.51 | 1.146678 |
| 1.15     | 1152.51 | 1.15     | 1152.51 | 1.15     | 1152.51 | 1.15     | 1152.51 | 1.15     |

|          |         |          |         |          |         |          |         |          |
|----------|---------|----------|---------|----------|---------|----------|---------|----------|
| 1.156678 | 1152.51 | 1.156678 | 1152.51 | 1.156678 | 1152.51 | 1.156678 | 1152.51 | 1.156678 |
| 1.16     | 1152.51 | 1.16     | 1152.51 | 1.16     | 1152.51 | 1.16     | 1152.51 | 1.16     |
| 1.166678 | 1152.51 | 1.166678 | 1152.51 | 1.166678 | 1152.51 | 1.166678 | 1152.51 | 1.166678 |
| 1.17     | 1152.51 | 1.17     | 1152.51 | 1.17     | 1152.51 | 1.17     | 1152.51 | 1.17     |
| 1.176678 | 1152.51 | 1.176678 | 1152.51 | 1.176678 | 1152.51 | 1.176678 | 1152.51 | 1.176678 |
| 1.18     | 1152.51 | 1.18     | 1152.51 | 1.18     | 1152.51 | 1.18     | 1152.51 | 1.18     |
| 1.186678 | 1152.51 | 1.186678 | 1152.51 | 1.186678 | 1152.51 | 1.186678 | 1152.51 | 1.186678 |
| 1.19     | 1152.51 | 1.19     | 1152.51 | 1.19     | 1152.51 | 1.19     | 1152.51 | 1.19     |
| 1.196678 | 1152.51 | 1.196678 | 1152.51 | 1.196678 | 1152.51 | 1.196678 | 1152.51 | 1.196678 |
| 1.2      | 1152.51 | 1.2      | 1152.51 | 1.2      | 1152.51 | 1.2      | 1152.51 | 1.2      |
| 1.206678 | 1152.51 | 1.206678 | 1152.51 | 1.206678 | 1152.51 | 1.206678 | 1152.51 | 1.206678 |
| 1.21     | 1152.51 | 1.21     | 1152.51 | 1.21     | 1152.51 | 1.21     | 1152.51 | 1.21     |
| 1.216678 | 1152.51 | 1.216678 | 1152.51 | 1.216678 | 1152.51 | 1.216678 | 1152.51 | 1.216678 |
| 1.22     | 1152.51 | 1.22     | 1152.51 | 1.22     | 1152.51 | 1.22     | 1152.51 | 1.22     |
| 1.226678 | 1152.51 | 1.226678 | 1152.51 | 1.226678 | 1152.51 | 1.226678 | 1152.51 | 1.226678 |
| 1.23     | 1152.51 | 1.23     | 1152.51 | 1.23     | 1152.51 | 1.23     | 1152.51 | 1.23     |
| 1.236678 | 1152.51 | 1.236678 | 1152.51 | 1.236678 | 1152.51 | 1.236678 | 1152.51 | 1.236678 |
| 1.24     | 1152.51 | 1.24     | 1152.51 | 1.24     | 1152.51 | 1.24     | 1152.51 | 1.24     |
| 1.246678 | 1152.51 | 1.246678 | 1152.51 | 1.246678 | 1152.51 | 1.246678 | 1152.51 | 1.246678 |
| 1.25     | 1152.51 | 1.25     | 1152.51 | 1.25     | 1152.51 | 1.25     | 1152.51 | 1.25     |
| 1.256678 | 1152.51 | 1.256678 | 1152.51 | 1.256678 | 1152.51 | 1.256678 | 1152.51 | 1.256678 |
| 1.26     | 1152.51 | 1.26     | 1152.51 | 1.26     | 1152.51 | 1.26     | 1152.51 | 1.26     |
| 1.266678 | 1152.51 | 1.266678 | 1152.51 | 1.266678 | 1152.51 | 1.266678 | 1152.51 | 1.266678 |
| 1.27     | 1152.51 | 1.27     | 1152.51 | 1.27     | 1152.51 | 1.27     | 1152.51 | 1.27     |
| 1.276678 | 1152.51 | 1.276678 | 1152.51 | 1.276678 | 1152.51 | 1.276678 | 1152.51 | 1.276678 |
| 1.28     | 1152.51 | 1.28     | 1152.51 | 1.28     | 1152.51 | 1.28     | 1152.51 | 1.28     |
| 1.286678 | 1152.51 | 1.286678 | 1152.51 | 1.286678 | 1152.51 | 1.286678 | 1152.51 | 1.286678 |
| 1.29     | 1152.51 | 1.29     | 1152.51 | 1.29     | 1152.51 | 1.29     | 1152.51 | 1.29     |
| 1.296678 | 1152.51 | 1.296678 | 1152.51 | 1.296678 | 1152.51 | 1.296678 | 1152.51 | 1.296678 |
| 1.3      | 1152.51 | 1.3      | 1152.51 | 1.3      | 1152.51 | 1.3      | 1152.51 | 1.3      |
| 1.306678 | 1152.51 | 1.306678 | 1152.51 | 1.306678 | 1152.51 | 1.306678 | 1152.51 | 1.306678 |
| 1.31     | 1152.51 | 1.31     | 1152.51 | 1.31     | 1152.51 | 1.31     | 1152.51 | 1.31     |
| 1.316678 | 1152.51 | 1.316678 | 1152.51 | 1.316678 | 1152.51 | 1.316678 | 1152.51 | 1.316678 |
| 1.32     | 1152.51 | 1.32     | 1152.51 | 1.32     | 1152.51 | 1.32     | 1152.51 | 1.32     |
| 1.326678 | 1152.51 | 1.326678 | 1152.51 | 1.326678 | 1152.51 | 1.326678 | 1152.51 | 1.326678 |
| 1.33     | 1152.51 | 1.33     | 1152.51 | 1.33     | 1152.51 | 1.33     | 1152.51 | 1.33     |
| 1.336678 | 1152.51 | 1.336678 | 1152.51 | 1.336678 | 1152.51 | 1.336678 | 1152.51 | 1.336678 |
| 1.34     | 1152.51 | 1.34     | 1152.51 | 1.34     | 1152.51 | 1.34     | 1152.51 | 1.34     |
| 1.346678 | 1152.51 | 1.346678 | 1152.51 | 1.346678 | 1152.51 | 1.346678 | 1152.51 | 1.346678 |
| 1.35     | 1152.51 | 1.35     | 1152.51 | 1.35     | 1152.51 | 1.35     | 1152.51 | 1.35     |
| 1.356678 | 1152.51 | 1.356678 | 1152.51 | 1.356678 | 1152.51 | 1.356678 | 1152.51 | 1.356678 |
| 1.36     | 1152.51 | 1.36     | 1152.51 | 1.36     | 1152.51 | 1.36     | 1152.51 | 1.36     |
| 1.366678 | 1152.51 | 1.366678 | 1152.51 | 1.366678 | 1152.51 | 1.366678 | 1152.51 | 1.366678 |
| 1.37     | 1152.51 | 1.37     | 1152.51 | 1.37     | 1152.51 | 1.37     | 1152.51 | 1.37     |
| 1.376678 | 1152.51 | 1.376678 | 1152.51 | 1.376678 | 1152.51 | 1.376678 | 1152.51 | 1.376678 |
| 1.38     | 1152.51 | 1.38     | 1152.51 | 1.38     | 1152.51 | 1.38     | 1152.51 | 1.38     |
| 1.386678 | 1152.51 | 1.386678 | 1152.51 | 1.386678 | 1152.51 | 1.386678 | 1152.51 | 1.386678 |

|          |         |          |         |          |         |          |         |          |
|----------|---------|----------|---------|----------|---------|----------|---------|----------|
| 1.39     | 1152.51 | 1.39     | 1152.51 | 1.39     | 1152.51 | 1.39     | 1152.51 | 1.39     |
| 1.396678 | 1152.51 | 1.396678 | 1152.51 | 1.396678 | 1152.51 | 1.396678 | 1152.51 | 1.396678 |
| 1.4      | 1152.51 | 1.4      | 1152.51 | 1.4      | 1152.51 | 1.4      | 1152.51 | 1.4      |
| 1.406678 | 1152.51 | 1.406678 | 1152.51 | 1.406678 | 1152.51 | 1.406678 | 1152.51 | 1.406678 |
| 1.41     | 1152.51 | 1.41     | 1152.51 | 1.41     | 1152.51 | 1.41     | 1152.51 | 1.41     |
| 1.416678 | 1152.51 | 1.416678 | 1152.51 | 1.416678 | 1152.51 | 1.416678 | 1152.51 | 1.416678 |
| 1.42     | 1152.51 | 1.42     | 1152.51 | 1.42     | 1152.51 | 1.42     | 1152.51 | 1.42     |
| 1.426678 | 1152.51 | 1.426678 | 1152.51 | 1.426678 | 1152.51 | 1.426678 | 1152.51 | 1.426678 |
| 1.43     | 1152.51 | 1.43     | 1152.51 | 1.43     | 1152.51 | 1.43     | 1152.51 | 1.43     |
| 1.436678 | 1152.51 | 1.436678 | 1152.51 | 1.436678 | 1152.51 | 1.436678 | 1152.51 | 1.436678 |
| 1.44     | 1152.51 | 1.44     | 1152.51 | 1.44     | 1152.51 | 1.44     | 1152.51 | 1.44     |
| 1.446678 | 1152.51 | 1.446678 | 1152.51 | 1.446678 | 1152.51 | 1.446678 | 1152.51 | 1.446678 |
| 1.45     | 1152.51 | 1.45     | 1152.51 | 1.45     | 1152.51 | 1.45     | 1152.51 | 1.45     |
| 1.456678 | 1152.51 | 1.456678 | 1152.51 | 1.456678 | 1152.51 | 1.456678 | 1152.51 | 1.456678 |
| 1.46     | 1152.51 | 1.46     | 1152.51 | 1.46     | 1152.51 | 1.46     | 1152.51 | 1.46     |
| 1.466678 | 1152.51 | 1.466678 | 1152.51 | 1.466678 | 1152.51 | 1.466678 | 1152.51 | 1.466678 |
| 1.47     | 1152.51 | 1.47     | 1152.51 | 1.47     | 1152.51 | 1.47     | 1152.51 | 1.47     |
| 1.476678 | 1152.51 | 1.476678 | 1152.51 | 1.476678 | 1152.51 | 1.476678 | 1152.51 | 1.476678 |
| 1.48     | 1152.51 | 1.48     | 1152.51 | 1.48     | 1152.51 | 1.48     | 1152.51 | 1.48     |
| 1.486678 | 1152.51 | 1.486678 | 1152.51 | 1.486678 | 1152.51 | 1.486678 | 1152.51 | 1.486678 |
| 1.49     | 1152.51 | 1.49     | 1152.51 | 1.49     | 1152.51 | 1.49     | 1152.51 | 1.49     |
| 1.496678 | 1152.51 | 1.496678 | 1152.51 | 1.496678 | 1152.51 | 1.496678 | 1152.51 | 1.496678 |
| 1.5      | 1152.51 | 1.5      | 1152.51 | 1.5      | 1152.51 | 1.5      | 1152.51 | 1.5      |
| 1.506678 | 1152.51 | 1.506678 | 1152.51 | 1.506678 | 1152.51 | 1.506678 | 1152.51 | 1.506678 |
| 1.51     | 1152.51 | 1.51     | 1152.51 | 1.51     | 1152.51 | 1.51     | 1152.51 | 1.51     |
| 1.516678 | 1152.51 | 1.516678 | 1152.51 | 1.516678 | 1152.51 | 1.516678 | 1152.51 | 1.516678 |
| 1.52     | 1152.51 | 1.52     | 1152.51 | 1.52     | 1152.51 | 1.52     | 1152.51 | 1.52     |
| 1.526678 | 1152.51 | 1.526678 | 1152.51 | 1.526678 | 1152.51 | 1.526678 | 1152.51 | 1.526678 |
| 1.53     | 1152.51 | 1.53     | 1152.51 | 1.53     | 1152.51 | 1.53     | 1152.51 | 1.53     |
| 1.536678 | 1152.51 | 1.536678 | 1152.51 | 1.536678 | 1152.51 | 1.536678 | 1152.51 | 1.536678 |
| 1.54     | 1152.51 | 1.54     | 1152.51 | 1.54     | 1152.51 | 1.54     | 1152.51 | 1.54     |
| 1.546678 | 1152.51 | 1.546678 | 1152.51 | 1.546678 | 1152.51 | 1.546678 | 1152.51 | 1.546678 |
| 1.55     | 1152.51 | 1.55     | 1152.51 | 1.55     | 1152.51 | 1.55     | 1152.51 | 1.55     |
| 1.556678 | 1152.51 | 1.556678 | 1152.51 | 1.556678 | 1152.51 | 1.556678 | 1152.51 | 1.556678 |
| 1.56     | 1152.51 | 1.56     | 1152.51 | 1.56     | 1152.51 | 1.56     | 1152.51 | 1.56     |
| 1.566678 | 1152.51 | 1.566678 | 1152.51 | 1.566678 | 1152.51 | 1.566678 | 1152.51 | 1.566678 |
| 1.57     | 1152.51 | 1.57     | 1152.51 | 1.57     | 1152.51 | 1.57     | 1152.51 | 1.57     |
| 1.576678 | 1152.51 | 1.576678 | 1152.51 | 1.576678 | 1152.51 | 1.576678 | 1152.51 | 1.576678 |
| 1.58     | 1152.51 | 1.58     | 1152    |          |         |          |         |          |

|          |         |            |         |          |         |          |         |          |
|----------|---------|------------|---------|----------|---------|----------|---------|----------|
| 1.626678 | 1152.51 | 1.626678   | 1152.51 | 1.626678 | 1152.51 | 1.626678 | 1152.51 | 1.626678 |
| 1.63     | 1152.51 | 1.63       | 1152.51 | 1.63     | 1152.51 | 1.63     | 1152.51 | 1.63     |
| 1.636678 | 1152.51 | 1.636678   | 1152.51 | 1.636678 | 1152.51 | 1.636678 | 1152.51 | 1.636678 |
| 1.64     | 1152.51 | 1.64       | 1152.51 | 1.64     | 1152.51 | 1.64     | 1152.51 | 1.64     |
| 1.646678 | 1152.51 | 1.646678   | 1152.51 | 1.646678 | 1152.51 | 1.646678 | 1152.51 | 1.646678 |
| 1.65     | 1152.51 | 1.65       | 1152.51 | 1.65     | 1152.51 | 1.65     | 1152.51 | 1.65     |
| 1.656678 | 1152.51 | 1.656678   | 1152.51 | 1.656678 | 1152.51 | 1.656678 | 1152.51 | 1.656678 |
| 1.66     | 1152.51 | 1.66       | 1152.51 | 1.66     | 1152.51 | 1.66     | 1152.51 | 1.66     |
| 1.666678 | 1152.51 | 1.666678   | 1152.51 | 1.666678 | 1152.51 | 1.666678 | 1152.51 | 1.666678 |
| 1.67     | 1152.51 | 1.67       | 1152.51 | 1.67     | 1152.51 | 1.67     | 1152.51 | 1.67     |
| 1.676678 | 1152.51 | 1.676678   | 1152.51 | 1.676678 | 1152.51 | 1.676678 | 1152.51 | 1.676678 |
| 1.68     | 1152.51 | 1.68       | 1152.51 | 1.68     | 1152.51 | 1.68     | 1152.51 | 1.68     |
| 1.686678 | 1152.51 | 1.686678   | 1152.51 | 1.686678 | 1152.51 | 1.686678 | 1152.51 | 1.686678 |
| 1.69     | 1152.51 | 1.69       | 1152.51 | 1.69     | 1152.51 | 1.69     | 1152.51 | 1.69     |
| 1.696678 | 1152.51 | 1.696678   | 1152.51 | 1.696678 | 1152.51 | 1.696678 | 1152.51 | 1.696678 |
| 1.7      | 1152.51 | 1.7        | 1152.51 | 1.7      | 1152.51 | 1.7      | 1152.51 | 1.7      |
| 1.706678 | 1152.51 | 1.706678   | 1152.51 | 1.706678 | 1152.51 | 1.706678 | 1152.51 | 1.706678 |
| 1.71     | 1152.51 | 1.71       | 1152.51 | 1.71     | 1152.51 | 1.71     | 1152.51 | 1.71     |
| 1.716678 | 1152.51 | 1.716678   | 1152.51 | 1.716678 | 1152.51 | 1.716678 | 1152.51 | 1.716678 |
| 1.72     | 1152.51 | 1.72       | 1152.51 | 1.72     | 1152.51 | 1.72     | 1152.51 | 1.72     |
| 1.726678 | 1152.51 | 1.726678   | 1152.51 | 1.726678 | 1152.51 | 1.726678 | 1152.51 | 1.726678 |
| 1.73     | 1152.51 | 1.73       | 1152.51 | 1.73     | 1152.51 | 1.73     | 1152.51 | 1.73     |
| 1.736678 | 1152.51 | 1.736678   | 1152.51 | 1.736678 | 1152.51 | 1.736678 | 1152.51 | 1.736678 |
| 1.74     | 1152.51 | 1.74       | 1152.51 | 1.74     | 1152.51 | 1.74     | 1152.51 | 1.74     |
| 1.746678 | 1152.51 | 1.746678   | 1152.51 | 1.746678 | 1152.51 | 1.746678 | 1152.51 | 1.746678 |
| 1.75     | 1152.51 | 1.75       | 1152.51 | 1.75     | 1152.51 | 1.75     | 1152.51 | 1.75     |
| 1.756678 | 1152.51 | 1.756678   | 1152.51 | 1.756678 | 1152.51 | 1.756678 | 1152.51 | 1.756678 |
| 1.76     | 1152.51 | 1.76       | 1152.51 | 1.76     | 1152.51 | 1.76     | 1152.51 | 1.76     |
| 1.766678 | 1152.51 | 1.766678   | 1152.51 | 1.766678 | 1152.51 | 1.766678 | 1152.51 | 1.766678 |
| 1.77     | 1152.51 | 1.77       | 1152.51 | 1.77     | 1152.51 | 1.77     | 1152.51 | 1.77     |
| 1.776678 | 1152.51 | 1.776678   | 1152.51 | 1.776678 | 1152.51 | 1.776678 | 1152.51 | 1.776678 |
| 1.78     | 1152.51 | 1.78       | 1152.51 | 1.78     | 1152.51 | 1.78     | 1152.51 | 1.78     |
| 1.786678 | 1152.51 | 1.786678   | 1152.51 | 1.786678 | 1152.51 | 1.786678 | 1152.51 | 1.786678 |
| 1.79     | 1152.51 | 1.79       | 1152.51 | 1.79     | 1152.51 | 1.79     | 1152.51 | 1.79     |
| 1.796678 | 1152.51 | 1.796678   | 1152.51 | 1.796678 | 1152.51 | 1.796678 | 1152.51 | 1.796678 |
| 1.8      | 1152.51 | 1.8        | 1152.51 | 1.8      | 1152.51 | 1.8      | 1152.51 | 1.8      |
| 1.806678 | 1152.51 | 1.806678   | 1152.51 | 1.806678 | 1152.51 | 1.806678 | 1152.51 | 1.806678 |
| 1.81     | 1152.51 | 1.81       | 1152.51 | 1.81     | 1152.51 | 1.81     | 1152.51 | 1.81     |
| 1.816678 | 1152.51 | 1.816678</ |         |          |         |          |         |          |



|          |         |          |         |          |         |          |         |          |
|----------|---------|----------|---------|----------|---------|----------|---------|----------|
| 1.86     | 1152.51 | 1.86     | 1152.51 | 1.86     | 1152.51 | 1.86     | 1152.51 | 1.86     |
| 1.866678 | 1152.51 | 1.866678 | 1152.51 | 1.866678 | 1152.51 | 1.866678 | 1152.51 | 1.866678 |
| 1.87     | 1152.51 | 1.87     | 1152.51 | 1.87     | 1152.51 | 1.87     | 1152.51 | 1.87     |
| 1.876678 | 1152.51 | 1.876678 | 1152.51 | 1.876678 | 1152.51 | 1.876678 | 1152.51 | 1.876678 |
| 1.88     | 1152.51 | 1.88     | 1152.51 | 1.88     | 1152.51 | 1.88     | 1152.51 | 1.88     |
| 1.886678 | 1152.51 | 1.886678 | 1152.51 | 1.886678 | 1152.51 | 1.886678 | 1152.51 | 1.886678 |
| 1.89     | 1152.51 | 1.89     | 1152.51 | 1.89     | 1152.51 | 1.89     | 1152.51 | 1.89     |
| 1.896678 | 1152.51 | 1.896678 | 1152.51 | 1.896678 | 1152.51 | 1.896678 | 1152.51 | 1.896678 |
| 1.9      | 1152.51 | 1.9      | 1152.51 | 1.9      | 1152.51 | 1.9      | 1152.51 | 1.9      |
| 1.906678 | 1152.51 | 1.906678 | 1152.51 | 1.906678 | 1152.51 | 1.906678 | 1152.51 | 1.906678 |
| 1.91     | 1152.51 | 1.91     | 1152.51 | 1.91     | 1152.51 | 1.91     | 1152.51 | 1.91     |
| 1.916678 | 1152.51 | 1.916678 | 1152.51 | 1.916678 | 1152.51 | 1.916678 | 1152.51 | 1.916678 |
| 1.92     | 1152.51 | 1.92     | 1152.51 | 1.92     | 1152.51 | 1.92     | 1152.51 | 1.92     |
| 1.926678 | 1152.51 | 1.926678 | 1152.51 | 1.926678 | 1152.51 | 1.926678 | 1152.51 | 1.926678 |
| 1.93     | 1152.51 | 1.93     | 1152.51 | 1.93     | 1152.51 | 1.93     | 1152.51 | 1.93     |
| 1.936678 | 1152.51 | 1.936678 | 1152.51 | 1.936678 | 1152.51 | 1.936678 | 1152.51 | 1.936678 |
| 1.94     | 1152.51 | 1.94     | 1152.51 | 1.94     | 1152.51 | 1.94     | 1152.51 | 1.94     |
| 1.946678 | 1152.51 | 1.946678 | 1152.51 | 1.946678 | 1152.51 | 1.946678 | 1152.51 | 1.946678 |
| 1.95     | 1152.51 | 1.95     | 1152.51 | 1.95     | 1152.51 | 1.95     | 1152.51 | 1.95     |
| 1.956678 | 1152.51 | 1.956678 | 1152.51 | 1.956678 | 1152.51 | 1.956678 | 1152.51 | 1.956678 |
| 1.96     | 1152.51 | 1.96     | 1152.51 | 1.96     | 1152.51 | 1.96     | 1152.51 | 1.96     |
| 1.966678 | 1152.51 | 1.966678 | 1152.51 | 1.966678 | 1152.51 | 1.966678 | 1152.51 | 1.966678 |
| 1.97     | 1152.51 | 1.97     | 1152.51 | 1.97     | 1152.51 | 1.97     | 1152.51 | 1.97     |
| 1.976678 | 1152.51 | 1.976678 | 1152.51 | 1.976678 | 1152.51 | 1.976678 | 1152.51 | 1.976678 |
| 1.98     | 1152.51 | 1.98     | 1152.51 | 1.98     | 1152.51 | 1.98     | 1152.51 | 1.98     |
| 1.986678 | 1152.51 | 1.986678 | 1152.51 | 1.986678 | 1152.51 | 1.986678 | 1152.51 | 1.986678 |
| 1.99     | 1152.51 | 1.99     | 1152.51 | 1.99     | 1152.51 | 1.99     | 1152.51 | 1.99     |
| 1.996678 | 1152.51 | 1.996678 | 1152.51 | 1.996678 | 1152.51 | 1.996678 | 1152.51 | 1.996678 |
| 2        | 1152.51 | 2        | 1152.51 | 2        | 1152.51 | 2        | 1152.51 | 2        |
| 2.006678 | 1152.51 | 2.006678 | 1152.51 | 2.006678 | 1152.51 | 2.006678 | 1152.51 | 2.006678 |
| 2.01     | 1152.51 | 2.01     | 1152.51 | 2.01     | 1152.51 | 2.01     | 1152.51 | 2.01     |
| 2.016678 | 1152.51 | 2.016678 | 1152.51 | 2.016678 | 1152.51 | 2.016678 | 1152.51 | 2.016678 |
| 2.02     | 1152.51 | 2.02     | 1152.51 | 2.02     | 1152.51 | 2.02     | 1152.51 | 2.02     |
| 2.026678 | 1152.51 | 2.026678 | 1152.51 | 2.026678 | 1152.51 | 2.026678 | 1152.51 | 2.026678 |
| 2.03     | 1152.51 | 2.03     | 1152.51 | 2.03     | 1152.51 | 2.03     | 1152.51 | 2.03     |
| 2.036678 | 1152.51 | 2.036678 | 1152.51 | 2.036678 | 1152.51 | 2.036678 | 1152.51 | 2.036678 |
| 2.04     | 1152.51 | 2.04     | 1152.51 | 2.04     | 1152.51 | 2.04     | 1152.51 | 2.04     |
| 2.046678 | 1152.51 | 2.046678 | 1152.51 | 2.046678 | 1152.51 | 2.046678 | 1152.51 | 2.046678 |
| 2.05     | 1152.51 | 2.05     | 1152.51 | 2.05     | 1152.51 | 2.05     | 1152.51 | 2.05     |
| 2.056678 | 1152.51 | 2.056678 | 1152.51 | 2.056678 | 1152.51 | 2.056678 | 1152.51 | 2.056678 |
| 2.06     | 1152.51 | 2.06     | 1152.51 | 2.06     | 1152.51 | 2.06     | 1152.51 | 2.06     |
| 2.066678 | 1152.51 | 2.066678 | 1152.51 | 2.066678 | 1152.51 | 2.066678 | 1152.51 | 2.066678 |
| 2.07     | 1152.51 | 2.07     | 1152.51 | 2.07     | 1152.51 | 2.07     | 1152.51 | 2.07     |
| 2.076678 | 1152.51 | 2.076678 | 1152.51 | 2.076678 | 1152.51 | 2.076678 | 1152.51 | 2.076678 |
| 2.08     | 1152.51 | 2.08     | 1152.51 | 2.08     | 1152.51 | 2.08     | 1152.51 | 2.08     |
| 2.086678 | 1152.51 | 2.086678 | 1152.51 | 2.086678 | 1152.51 | 2.086678 | 1152.51 | 2.086678 |
| 2.09     | 1152.51 | 2.09     | 1152.51 | 2.09     | 1152.51 | 2.09     | 1152.51 | 2.09     |

|          |         |          |         |          |         |          |         |          |
|----------|---------|----------|---------|----------|---------|----------|---------|----------|
| 2.096678 | 1152.51 | 2.096678 | 1152.51 | 2.096678 | 1152.51 | 2.096678 | 1152.51 | 2.096678 |
| 2.1      | 1152.51 | 2.1      | 1152.51 | 2.1      | 1152.51 | 2.1      | 1152.51 | 2.1      |
| 2.106678 | 1152.51 | 2.106678 | 1152.51 | 2.106678 | 1152.51 | 2.106678 | 1152.51 | 2.106678 |
| 2.11     | 1152.51 | 2.11     | 1152.51 | 2.11     | 1152.51 | 2.11     | 1152.51 | 2.11     |
| 2.116678 | 1152.51 | 2.116678 | 1152.51 | 2.116678 | 1152.51 | 2.116678 | 1152.51 | 2.116678 |
| 2.12     | 1152.51 | 2.12     | 1152.51 | 2.12     | 1152.51 | 2.12     | 1152.51 | 2.12     |
| 2.126678 | 1152.51 | 2.126678 | 1152.51 | 2.126678 | 1152.51 | 2.126678 | 1152.51 | 2.126678 |
| 2.13     | 1152.51 | 2.13     | 1152.51 | 2.13     | 1152.51 | 2.13     | 1152.51 | 2.13     |
| 2.136678 | 1152.51 | 2.136678 | 1152.51 | 2.136678 | 1152.51 | 2.136678 | 1152.51 | 2.136678 |
| 2.14     | 1152.51 | 2.14     | 1152.51 | 2.14     | 1152.51 | 2.14     | 1152.51 | 2.14     |
| 2.146678 | 1152.51 | 2.146678 | 1152.51 | 2.146678 | 1152.51 | 2.146678 | 1152.51 | 2.146678 |
| 2.15     | 1152.51 | 2.15     | 1152.51 | 2.15     | 1152.51 | 2.15     | 1152.51 | 2.15     |
| 2.156678 | 1152.51 | 2.156678 | 1152.51 | 2.156678 | 1152.51 | 2.156678 | 1152.51 | 2.156678 |
| 2.16     | 1152.51 | 2.16     | 1152.51 | 2.16     | 1152.51 | 2.16     | 1152.51 | 2.16     |
| 2.166678 | 1152.51 | 2.166678 | 1152.51 | 2.166678 | 1152.51 | 2.166678 | 1152.51 | 2.166678 |
| 2.17     | 1152.51 | 2.17     | 1152.51 | 2.17     | 1152.51 | 2.17     | 1152.51 | 2.17     |
| 2.176678 | 1152.51 | 2.176678 | 1152.51 | 2.176678 | 1152.51 | 2.176678 | 1152.51 | 2.176678 |
| 2.18     | 1152.51 | 2.18     | 1152.51 | 2.18     | 1152.51 | 2.18     | 1152.51 | 2.18     |
| 2.186678 | 1152.51 | 2.186678 | 1152.51 | 2.186678 | 1152.51 | 2.186678 | 1152.51 | 2.186678 |
| 2.19     | 1152.51 | 2.19     | 1152.51 | 2.19     | 1152.51 | 2.19     | 1152.51 | 2.19     |
| 2.196678 | 1152.51 | 2.196678 | 1152.51 | 2.196678 | 1152.51 | 2.196678 | 1152.51 | 2.196678 |
| 2.2      | 1152.51 | 2.2      | 1152.51 | 2.2      | 1152.51 | 2.2      | 1152.51 | 2.2      |
| 2.206678 | 1152.51 | 2.206678 | 1152.51 | 2.206678 | 1152.51 | 2.206678 | 1152.51 | 2.206678 |
| 2.21     | 1152.51 | 2.21     | 1152.51 | 2.21     | 1152.51 | 2.21     | 1152.51 | 2.21     |
| 2.216678 | 1152.51 | 2.216678 | 1152.51 | 2.216678 | 1152.51 | 2.216678 | 1152.51 | 2.216678 |
| 2.22     | 1152.51 | 2.22     | 1152.51 | 2.22     | 1152.51 | 2.22     | 1152.51 | 2.22     |
| 2.226678 | 1152.51 | 2.226678 | 1152.51 | 2.226678 | 1152.51 | 2.226678 | 1152.51 | 2.226678 |
| 2.23     | 1152.51 | 2.23     | 1152.51 | 2.23     | 1152.51 | 2.23     | 1152.51 | 2.23     |
| 2.236678 | 1152.51 | 2.236678 | 1152.51 | 2.236678 | 1152.51 | 2.236678 | 1152.51 | 2.236678 |
| 2.24     | 1152.51 | 2.24     | 1152.51 | 2.24     | 1152.51 | 2.24     | 1152.51 | 2.24     |
| 2.246678 | 1152.51 | 2.246678 | 1152.51 | 2.246678 | 1152.51 | 2.246678 | 1152.51 | 2.246678 |
| 2.25     | 1152.51 | 2.25     | 1152.51 | 2.25     | 1152.51 | 2.25     | 1152.51 | 2.25     |
| 2.256678 | 1152.51 | 2.256678 | 1152.51 | 2.256678 | 1152.51 | 2.256678 | 1152.51 | 2.256678 |
| 2.26     | 1152.51 | 2.26     | 1152.51 | 2.26     | 1152.51 | 2.26     | 1152.51 | 2.26     |
| 2.266678 | 1152.51 | 2.266678 | 1152.51 | 2.266678 | 1152.51 | 2.266678 | 1152.51 | 2.266678 |
| 2.27     | 1152.51 | 2.27     | 1152.51 | 2.27     | 1152.51 | 2.27     | 1152.51 | 2.27     |
| 2.276678 | 1152.51 | 2.276678 | 1152.51 | 2.276678 | 1152.51 | 2.276678 | 1152.51 | 2.276678 |
| 2.28     | 1152.51 | 2.28     | 1152.51 | 2.28     | 1152.51 | 2.28     | 1152.51 | 2.28     |
| 2.286678 | 1152.51 | 2.286678 | 1152.51 | 2.286678 | 1152.51 | 2.286678 | 1152.51 | 2.286678 |
| 2.29     | 1152.51 | 2.29     | 1152.51 | 2.29     | 1152.51 | 2.29     | 1152.51 | 2.29     |
| 2.296678 | 1152.51 | 2.296678 | 1152.51 | 2.296678 | 1152.51 | 2.296678 | 1152.51 | 2.296678 |
| 2.3      | 1152.51 | 2.3      | 1152.51 | 2.3      | 1152.51 | 2.3      | 1152.51 | 2.3      |
| 2.306678 | 1152.51 | 2.306678 | 1152.51 | 2.306678 | 1152.51 | 2.306678 | 1152.51 | 2.306678 |
| 2.31     | 1152.51 | 2.31     | 1152.51 | 2.31     | 1152.51 | 2.31     | 1152.51 | 2.31     |
| 2.316678 | 1152.51 | 2.316678 | 1152.51 | 2.316678 | 1152.51 | 2.316678 | 1152.51 | 2.316678 |
| 2.32     | 1152.51 | 2.32     | 1152.51 | 2.32     | 1152.51 | 2.32     | 1152.51 | 2.32     |
| 2.326678 | 1152.51 | 2.326678 | 1152.51 | 2.326678 | 1152.51 | 2.326678 | 1152.51 | 2.326678 |

|          |         |          |         |          |         |          |         |          |
|----------|---------|----------|---------|----------|---------|----------|---------|----------|
| 2.33     | 1152.51 | 2.33     | 1152.51 | 2.33     | 1152.51 | 2.33     | 1152.51 | 2.33     |
| 2.336678 | 1152.51 | 2.336678 | 1152.51 | 2.336678 | 1152.51 | 2.336678 | 1152.51 | 2.336678 |
| 2.34     | 1152.51 | 2.34     | 1152.51 | 2.34     | 1152.51 | 2.34     | 1152.51 | 2.34     |
| 2.346678 | 1152.51 | 2.346678 | 1152.51 | 2.346678 | 1152.51 | 2.346678 | 1152.51 | 2.346678 |
| 2.35     | 1152.51 | 2.35     | 1152.51 | 2.35     | 1152.51 | 2.35     | 1152.51 | 2.35     |
| 2.356678 | 1152.51 | 2.356678 | 1152.51 | 2.356678 | 1152.51 | 2.356678 | 1152.51 | 2.356678 |
| 2.36     | 1152.51 | 2.36     | 1152.51 | 2.36     | 1152.51 | 2.36     | 1152.51 | 2.36     |
| 2.366678 | 1152.51 | 2.366678 | 1152.51 | 2.366678 | 1152.51 | 2.366678 | 1152.51 | 2.366678 |
| 2.37     | 1152.51 | 2.37     | 1152.51 | 2.37     | 1152.51 | 2.37     | 1152.51 | 2.37     |
| 2.376678 | 1152.51 | 2.376678 | 1152.51 | 2.376678 | 1152.51 | 2.376678 | 1152.51 | 2.376678 |
| 2.38     | 1152.51 | 2.38     | 1152.51 | 2.38     | 1152.51 | 2.38     | 1152.51 | 2.38     |
| 2.386678 | 1152.51 | 2.386678 | 1152.51 | 2.386678 | 1152.51 | 2.386678 | 1152.51 | 2.386678 |
| 2.39     | 1152.51 | 2.39     | 1152.51 | 2.39     | 1152.51 | 2.39     | 1152.51 | 2.39     |
| 2.396678 | 1152.51 | 2.396678 | 1152.51 | 2.396678 | 1152.51 | 2.396678 | 1152.51 | 2.396678 |
| 2.4      | 1152.51 | 2.4      | 1152.51 | 2.4      | 1152.51 | 2.4      | 1152.51 | 2.4      |
| 2.406678 | 1152.51 | 2.406678 | 1152.51 | 2.406678 | 1152.51 | 2.406678 | 1152.51 | 2.406678 |
| 2.41     | 1152.51 | 2.41     | 1152.51 | 2.41     | 1152.51 | 2.41     | 1152.51 | 2.41     |
| 2.416678 | 1152.51 | 2.416678 | 1152.51 | 2.416678 | 1152.51 | 2.416678 | 1152.51 | 2.416678 |
| 2.42     | 1152.51 | 2.42     | 1152.51 | 2.42     | 1152.51 | 2.42     | 1152.51 | 2.42     |
| 2.426678 | 1152.51 | 2.426678 | 1152.51 | 2.426678 | 1152.51 | 2.426678 | 1152.51 | 2.426678 |
| 2.43     | 1152.51 | 2.43     | 1152.51 | 2.43     | 1152.51 | 2.43     | 1152.51 | 2.43     |
| 2.436678 | 1152.51 | 2.436678 | 1152.51 | 2.436678 | 1152.51 | 2.436678 | 1152.51 | 2.436678 |
| 2.44     | 1152.51 | 2.44     | 1152.51 | 2.44     | 1152.51 | 2.44     | 1152.51 | 2.44     |
| 2.446678 | 1152.51 | 2.446678 | 1152.51 | 2.446678 | 1152.51 | 2.446678 | 1152.51 | 2.446678 |
| 2.45     | 1152.51 | 2.45     | 1152.51 | 2.45     | 1152.51 | 2.45     | 1152.51 | 2.45     |
| 2.456678 | 1152.51 | 2.456678 | 1152.51 | 2.456678 | 1152.51 | 2.456678 | 1152.51 | 2.456678 |
| 2.46     | 1152.51 | 2.46     | 1152.51 | 2.46     | 1152.51 | 2.46     | 1152.51 | 2.46     |
| 2.466678 | 1152.51 | 2.466678 | 1152.51 | 2.466678 | 1152.51 | 2.466678 | 1152.51 | 2.466678 |
| 2.47     | 1152.51 | 2.47     | 1152.51 | 2.47     | 1152.51 | 2.47     | 1152.51 | 2.47     |
| 2.476678 | 1152.51 | 2.476678 | 1152.51 | 2.476678 | 1152.51 | 2.476678 | 1152.51 | 2.476678 |
| 2.48     | 1152.51 | 2.48     | 1152.51 | 2.48     | 1152.51 | 2.48     | 1152.51 | 2.48     |
| 2.486678 | 1152.51 | 2.486678 | 1152.51 | 2.486678 | 1152.51 | 2.486678 | 1152.51 | 2.486678 |
| 2.49     | 1152.51 | 2.49     | 1152.51 | 2.49     | 1152.51 | 2.49     | 1152.51 | 2.49     |
| 2.496678 | 1152.51 | 2.496678 | 1152.51 | 2.496678 | 1152.51 | 2.496678 | 1152.51 | 2.496678 |
| 2.5      | 1152.51 | 2.5      | 1152.51 | 2.5      | 1152.51 | 2.5      | 1152.51 | 2.5      |
| 2.506678 | 1152.51 | 2.506678 | 1152.51 | 2.506678 | 1152.51 | 2.506678 | 1152.51 | 2.506678 |
| 2.51     | 1152.51 | 2.51     | 1152.51 | 2.51     | 1152.51 | 2.51     | 1152.51 | 2.51     |
| 2.516678 | 1152.51 | 2.516678 | 1152.51 | 2.516678 | 1152.51 | 2.516678 | 1152.51 | 2.516678 |
| 2.52     | 1152.51 | 2.52     | 1152    |          |         |          |         |          |

|          |         |            |         |          |         |          |         |          |
|----------|---------|------------|---------|----------|---------|----------|---------|----------|
| 2.566678 | 1152.51 | 2.566678   | 1152.51 | 2.566678 | 1152.51 | 2.566678 | 1152.51 | 2.566678 |
| 2.57     | 1152.51 | 2.57       | 1152.51 | 2.57     | 1152.51 | 2.57     | 1152.51 | 2.57     |
| 2.576678 | 1152.51 | 2.576678   | 1152.51 | 2.576678 | 1152.51 | 2.576678 | 1152.51 | 2.576678 |
| 2.58     | 1152.51 | 2.58       | 1152.51 | 2.58     | 1152.51 | 2.58     | 1152.51 | 2.58     |
| 2.586678 | 1152.51 | 2.586678   | 1152.51 | 2.586678 | 1152.51 | 2.586678 | 1152.51 | 2.586678 |
| 2.59     | 1152.51 | 2.59       | 1152.51 | 2.59     | 1152.51 | 2.59     | 1152.51 | 2.59     |
| 2.596678 | 1152.51 | 2.596678   | 1152.51 | 2.596678 | 1152.51 | 2.596678 | 1152.51 | 2.596678 |
| 2.6      | 1152.51 | 2.6        | 1152.51 | 2.6      | 1152.51 | 2.6      | 1152.51 | 2.6      |
| 2.606678 | 1152.51 | 2.606678   | 1152.51 | 2.606678 | 1152.51 | 2.606678 | 1152.51 | 2.606678 |
| 2.61     | 1152.51 | 2.61       | 1152.51 | 2.61     | 1152.51 | 2.61     | 1152.51 | 2.61     |
| 2.616678 | 1152.51 | 2.616678   | 1152.51 | 2.616678 | 1152.51 | 2.616678 | 1152.51 | 2.616678 |
| 2.62     | 1152.51 | 2.62       | 1152.51 | 2.62     | 1152.51 | 2.62     | 1152.51 | 2.62     |
| 2.626678 | 1152.51 | 2.626678   | 1152.51 | 2.626678 | 1152.51 | 2.626678 | 1152.51 | 2.626678 |
| 2.63     | 1152.51 | 2.63       | 1152.51 | 2.63     | 1152.51 | 2.63     | 1152.51 | 2.63     |
| 2.636678 | 1152.51 | 2.636678   | 1152.51 | 2.636678 | 1152.51 | 2.636678 | 1152.51 | 2.636678 |
| 2.64     | 1152.51 | 2.64       | 1152.51 | 2.64     | 1152.51 | 2.64     | 1152.51 | 2.64     |
| 2.646678 | 1152.51 | 2.646678   | 1152.51 | 2.646678 | 1152.51 | 2.646678 | 1152.51 | 2.646678 |
| 2.65     | 1152.51 | 2.65       | 1152.51 | 2.65     | 1152.51 | 2.65     | 1152.51 | 2.65     |
| 2.656678 | 1152.51 | 2.656678   | 1152.51 | 2.656678 | 1152.51 | 2.656678 | 1152.51 | 2.656678 |
| 2.66     | 1152.51 | 2.66       | 1152.51 | 2.66     | 1152.51 | 2.66     | 1152.51 | 2.66     |
| 2.666678 | 1152.51 | 2.666678   | 1152.51 | 2.666678 | 1152.51 | 2.666678 | 1152.51 | 2.666678 |
| 2.67     | 1152.51 | 2.67       | 1152.51 | 2.67     | 1152.51 | 2.67     | 1152.51 | 2.67     |
| 2.676678 | 1152.51 | 2.676678   | 1152.51 | 2.676678 | 1152.51 | 2.676678 | 1152.51 | 2.676678 |
| 2.68     | 1152.51 | 2.68       | 1152.51 | 2.68     | 1152.51 | 2.68     | 1152.51 | 2.68     |
| 2.686678 | 1152.51 | 2.686678   | 1152.51 | 2.686678 | 1152.51 | 2.686678 | 1152.51 | 2.686678 |
| 2.69     | 1152.51 | 2.69       | 1152.51 | 2.69     | 1152.51 | 2.69     | 1152.51 | 2.69     |
| 2.696678 | 1152.51 | 2.696678   | 1152.51 | 2.696678 | 1152.51 | 2.696678 | 1152.51 | 2.696678 |
| 2.7      | 1152.51 | 2.7        | 1152.51 | 2.7      | 1152.51 | 2.7      | 1152.51 | 2.7      |
| 2.706678 | 1152.51 | 2.706678   | 1152.51 | 2.706678 | 1152.51 | 2.706678 | 1152.51 | 2.706678 |
| 2.71     | 1152.51 | 2.71       | 1152.51 | 2.71     | 1152.51 | 2.71     | 1152.51 | 2.71     |
| 2.716678 | 1152.51 | 2.716678   | 1152.51 | 2.716678 | 1152.51 | 2.716678 | 1152.51 | 2.716678 |
| 2.72     | 1152.51 | 2.72       | 1152.51 | 2.72     | 1152.51 | 2.72     | 1152.51 | 2.72     |
| 2.726678 | 1152.51 | 2.726678   | 1152.51 | 2.726678 | 1152.51 | 2.726678 | 1152.51 | 2.726678 |
| 2.73     | 1152.51 | 2.73       | 1152.51 | 2.73     | 1152.51 | 2.73     | 1152.51 | 2.73     |
| 2.736678 | 1152.51 | 2.736678   | 1152.51 | 2.736678 | 1152.51 | 2.736678 | 1152.51 | 2.736678 |
| 2.74     | 1152.51 | 2.74       | 1152.51 | 2.74     | 1152.51 | 2.74     | 1152.51 | 2.74     |
| 2.746678 | 1152.51 | 2.746678   | 1152.51 | 2.746678 | 1152.51 | 2.746678 | 1152.51 | 2.746678 |
| 2.75     | 1152.51 | 2.75       | 1152.51 | 2.75     | 1152.51 | 2.75     | 1152.51 | 2.75     |
| 2.756678 | 1152.51 | 2.756678</ |         |          |         |          |         |          |

|          |         |          |         |          |         |          |         |          |
|----------|---------|----------|---------|----------|---------|----------|---------|----------|
| 2.8      | 1152.51 | 2.8      | 1152.51 | 2.8      | 1152.51 | 2.8      | 1152.51 | 2.8      |
| 2.806678 | 1152.51 | 2.806678 | 1152.51 | 2.806678 | 1152.51 | 2.806678 | 1152.51 | 2.806678 |
| 2.81     | 1152.51 | 2.81     | 1152.51 | 2.81     | 1152.51 | 2.81     | 1152.51 | 2.81     |
| 2.816678 | 1152.51 | 2.816678 | 1152.51 | 2.816678 | 1152.51 | 2.816678 | 1152.51 | 2.816678 |
| 2.82     | 1152.51 | 2.82     | 1152.51 | 2.82     | 1152.51 | 2.82     | 1152.51 | 2.82     |
| 2.826678 | 1152.51 | 2.826678 | 1152.51 | 2.826678 | 1152.51 | 2.826678 | 1152.51 | 2.826678 |
| 2.83     | 1152.51 | 2.83     | 1152.51 | 2.83     | 1152.51 | 2.83     | 1152.51 | 2.83     |
| 2.836678 | 1152.51 | 2.836678 | 1152.51 | 2.836678 | 1152.51 | 2.836678 | 1152.51 | 2.836678 |
| 2.84     | 1152.51 | 2.84     | 1152.51 | 2.84     | 1152.51 | 2.84     | 1152.51 | 2.84     |
| 2.846678 | 1152.51 | 2.846678 | 1152.51 | 2.846678 | 1152.51 | 2.846678 | 1152.51 | 2.846678 |
| 2.85     | 1152.51 | 2.85     | 1152.51 | 2.85     | 1152.51 | 2.85     | 1152.51 | 2.85     |
| 2.856678 | 1152.51 | 2.856678 | 1152.51 | 2.856678 | 1152.51 | 2.856678 | 1152.51 | 2.856678 |
| 2.86     | 1152.51 | 2.86     | 1152.51 | 2.86     | 1152.51 | 2.86     | 1152.51 | 2.86     |
| 2.866678 | 1152.51 | 2.866678 | 1152.51 | 2.866678 | 1152.51 | 2.866678 | 1152.51 | 2.866678 |
| 2.87     | 1152.51 | 2.87     | 1152.51 | 2.87     | 1152.51 | 2.87     | 1152.51 | 2.87     |
| 2.876678 | 1152.51 | 2.876678 | 1152.51 | 2.876678 | 1152.51 | 2.876678 | 1152.51 | 2.876678 |
| 2.88     | 1152.51 | 2.88     | 1152.51 | 2.88     | 1152.51 | 2.88     | 1152.51 | 2.88     |
| 2.886678 | 1152.51 | 2.886678 | 1152.51 | 2.886678 | 1152.51 | 2.886678 | 1152.51 | 2.886678 |
| 2.89     | 1152.51 | 2.89     | 1152.51 | 2.89     | 1152.51 | 2.89     | 1152.51 | 2.89     |
| 2.896678 | 1152.51 | 2.896678 | 1152.51 | 2.896678 | 1152.51 | 2.896678 | 1152.51 | 2.896678 |
| 2.9      | 1152.51 | 2.9      | 1152.51 | 2.9      | 1152.51 | 2.9      | 1152.51 | 2.9      |
| 2.906678 | 1152.51 | 2.906678 | 1152.51 | 2.906678 | 1152.51 | 2.906678 | 1152.51 | 2.906678 |
| 2.91     | 1152.51 | 2.91     | 1152.51 | 2.91     | 1152.51 | 2.91     | 1152.51 | 2.91     |
| 2.916678 | 1152.51 | 2.916678 | 1152.51 | 2.916678 | 1152.51 | 2.916678 | 1152.51 | 2.916678 |
| 2.92     | 1152.51 | 2.92     | 1152.51 | 2.92     | 1152.51 | 2.92     | 1152.51 | 2.92     |
| 2.926678 | 1152.51 | 2.926678 | 1152.51 | 2.926678 | 1152.51 | 2.926678 | 1152.51 | 2.926678 |
| 2.93     | 1152.51 | 2.93     | 1152.51 | 2.93     | 1152.51 | 2.93     | 1152.51 | 2.93     |
| 2.936678 | 1152.51 | 2.936678 | 1152.51 | 2.936678 | 1152.51 | 2.936678 | 1152.51 | 2.936678 |
| 2.94     | 1152.51 | 2.94     | 1152.51 | 2.94     | 1152.51 | 2.94     | 1152.51 | 2.94     |
| 2.946678 | 1152.51 | 2.946678 | 1152.51 | 2.946678 | 1152.51 | 2.946678 | 1152.51 | 2.946678 |
| 2.95     | 1152.51 | 2.95     | 1152.51 | 2.95     | 1152.51 | 2.95     | 1152.51 | 2.95     |
| 2.956678 | 1152.51 | 2.956678 | 1152.51 | 2.956678 | 1152.51 | 2.956678 | 1152.51 | 2.956678 |
| 2.96     | 1152.51 | 2.96     | 1152.51 | 2.96     | 1152.51 | 2.96     | 1152.51 | 2.96     |
| 2.966678 | 1152.51 | 2.966678 | 1152.51 | 2.966678 | 1152.51 | 2.966678 | 1152.51 | 2.966678 |
| 2.97     | 1152.51 | 2.97     | 1152.51 | 2.97     | 1152.51 | 2.97     | 1152.51 | 2.97     |
| 2.976678 | 1152.51 | 2.976678 | 1152.51 | 2.976678 | 1152.51 | 2.976678 | 1152.51 | 2.976678 |
| 2.98     | 1152.51 | 2.98     | 1152.51 | 2.98     | 1152.51 | 2.98     | 1152.51 | 2.98     |
| 2.986678 | 1152.51 | 2.986678 | 1152.51 | 2.986678 | 1152.51 | 2.986678 | 1152.51 | 2.986678 |
| 2.99     | 1152.51 | 2.99     | 1152    |          |         |          |         |          |

|          |         |            |         |          |         |          |         |          |
|----------|---------|------------|---------|----------|---------|----------|---------|----------|
| 3.036678 | 1152.51 | 3.036678   | 1152.51 | 3.036678 | 1152.51 | 3.036678 | 1152.51 | 3.036678 |
| 3.04     | 1152.51 | 3.04       | 1152.51 | 3.04     | 1152.51 | 3.04     | 1152.51 | 3.04     |
| 3.046678 | 1152.51 | 3.046678   | 1152.51 | 3.046678 | 1152.51 | 3.046678 | 1152.51 | 3.046678 |
| 3.05     | 1152.51 | 3.05       | 1152.51 | 3.05     | 1152.51 | 3.05     | 1152.51 | 3.05     |
| 3.056678 | 1152.51 | 3.056678   | 1152.51 | 3.056678 | 1152.51 | 3.056678 | 1152.51 | 3.056678 |
| 3.06     | 1152.51 | 3.06       | 1152.51 | 3.06     | 1152.51 | 3.06     | 1152.51 | 3.06     |
| 3.066678 | 1152.51 | 3.066678   | 1152.51 | 3.066678 | 1152.51 | 3.066678 | 1152.51 | 3.066678 |
| 3.07     | 1152.51 | 3.07       | 1152.51 | 3.07     | 1152.51 | 3.07     | 1152.51 | 3.07     |
| 3.076678 | 1152.51 | 3.076678   | 1152.51 | 3.076678 | 1152.51 | 3.076678 | 1152.51 | 3.076678 |
| 3.08     | 1152.51 | 3.08       | 1152.51 | 3.08     | 1152.51 | 3.08     | 1152.51 | 3.08     |
| 3.086678 | 1152.51 | 3.086678   | 1152.51 | 3.086678 | 1152.51 | 3.086678 | 1152.51 | 3.086678 |
| 3.09     | 1152.51 | 3.09       | 1152.51 | 3.09     | 1152.51 | 3.09     | 1152.51 | 3.09     |
| 3.096678 | 1152.51 | 3.096678   | 1152.51 | 3.096678 | 1152.51 | 3.096678 | 1152.51 | 3.096678 |
| 3.1      | 1152.51 | 3.1        | 1152.51 | 3.1      | 1152.51 | 3.1      | 1152.51 | 3.1      |
| 3.106678 | 1152.51 | 3.106678   | 1152.51 | 3.106678 | 1152.51 | 3.106678 | 1152.51 | 3.106678 |
| 3.11     | 1152.51 | 3.11       | 1152.51 | 3.11     | 1152.51 | 3.11     | 1152.51 | 3.11     |
| 3.116678 | 1152.51 | 3.116678   | 1152.51 | 3.116678 | 1152.51 | 3.116678 | 1152.51 | 3.116678 |
| 3.12     | 1152.51 | 3.12       | 1152.51 | 3.12     | 1152.51 | 3.12     | 1152.51 | 3.12     |
| 3.126678 | 1152.51 | 3.126678   | 1152.51 | 3.126678 | 1152.51 | 3.126678 | 1152.51 | 3.126678 |
| 3.13     | 1152.51 | 3.13       | 1152.51 | 3.13     | 1152.51 | 3.13     | 1152.51 | 3.13     |
| 3.136678 | 1152.51 | 3.136678   | 1152.51 | 3.136678 | 1152.51 | 3.136678 | 1152.51 | 3.136678 |
| 3.14     | 1152.51 | 3.14       | 1152.51 | 3.14     | 1152.51 | 3.14     | 1152.51 | 3.14     |
| 3.146678 | 1152.51 | 3.146678   | 1152.51 | 3.146678 | 1152.51 | 3.146678 | 1152.51 | 3.146678 |
| 3.15     | 1152.51 | 3.15       | 1152.51 | 3.15     | 1152.51 | 3.15     | 1152.51 | 3.15     |
| 3.156678 | 1152.51 | 3.156678   | 1152.51 | 3.156678 | 1152.51 | 3.156678 | 1152.51 | 3.156678 |
| 3.16     | 1152.51 | 3.16       | 1152.51 | 3.16     | 1152.51 | 3.16     | 1152.51 | 3.16     |
| 3.166678 | 1152.51 | 3.166678   | 1152.51 | 3.166678 | 1152.51 | 3.166678 | 1152.51 | 3.166678 |
| 3.17     | 1152.51 | 3.17       | 1152.51 | 3.17     | 1152.51 | 3.17     | 1152.51 | 3.17     |
| 3.176678 | 1152.51 | 3.176678   | 1152.51 | 3.176678 | 1152.51 | 3.176678 | 1152.51 | 3.176678 |
| 3.18     | 1152.51 | 3.18       | 1152.51 | 3.18     | 1152.51 | 3.18     | 1152.51 | 3.18     |
| 3.186678 | 1152.51 | 3.186678   | 1152.51 | 3.186678 | 1152.51 | 3.186678 | 1152.51 | 3.186678 |
| 3.19     | 1152.51 | 3.19       | 1152.51 | 3.19     | 1152.51 | 3.19     | 1152.51 | 3.19     |
| 3.196678 | 1152.51 | 3.196678   | 1152.51 | 3.196678 | 1152.51 | 3.196678 | 1152.51 | 3.196678 |
| 3.2      | 1152.51 | 3.2        | 1152.51 | 3.2      | 1152.51 | 3.2      | 1152.51 | 3.2      |
| 3.206678 | 1152.51 | 3.206678   | 1152.51 | 3.206678 | 1152.51 | 3.206678 | 1152.51 | 3.206678 |
| 3.21     | 1152.51 | 3.21       | 1152.51 | 3.21     | 1152.51 | 3.21     | 1152.51 | 3.21     |
| 3.216678 | 1152.51 | 3.216678   | 1152.51 | 3.216678 | 1152.51 | 3.216678 | 1152.51 | 3.216678 |
| 3.22     | 1152.51 | 3.22       | 1152.51 | 3.22     | 1152.51 | 3.22     | 1152.51 | 3.22     |
| 3.226678 | 1152.51 | 3.226678</ |         |          |         |          |         |          |

|          |         |          |         |          |         |          |         |          |
|----------|---------|----------|---------|----------|---------|----------|---------|----------|
| 3.27     | 1152.51 | 3.27     | 1152.51 | 3.27     | 1152.51 | 3.27     | 1152.51 | 3.27     |
| 3.276678 | 1152.51 | 3.276678 | 1152.51 | 3.276678 | 1152.51 | 3.276678 | 1152.51 | 3.276678 |
| 3.28     | 1152.51 | 3.28     | 1152.51 | 3.28     | 1152.51 | 3.28     | 1152.51 | 3.28     |
| 3.286678 | 1152.51 | 3.286678 | 1152.51 | 3.286678 | 1152.51 | 3.286678 | 1152.51 | 3.286678 |
| 3.29     | 1152.51 | 3.29     | 1152.51 | 3.29     | 1152.51 | 3.29     | 1152.51 | 3.29     |
| 3.296678 | 1152.51 | 3.296678 | 1152.51 | 3.296678 | 1152.51 | 3.296678 | 1152.51 | 3.296678 |
| 3.3      | 1152.51 | 3.3      | 1152.51 | 3.3      | 1152.51 | 3.3      | 1152.51 | 3.3      |
| 3.306678 | 1152.51 | 3.306678 | 1152.51 | 3.306678 | 1152.51 | 3.306678 | 1152.51 | 3.306678 |
| 3.31     | 1152.51 | 3.31     | 1152.51 | 3.31     | 1152.51 | 3.31     | 1152.51 | 3.31     |
| 3.316678 | 1152.51 | 3.316678 | 1152.51 | 3.316678 | 1152.51 | 3.316678 | 1152.51 | 3.316678 |
| 3.32     | 1152.51 | 3.32     | 1152.51 | 3.32     | 1152.51 | 3.32     | 1152.51 | 3.32     |
| 3.326678 | 1152.51 | 3.326678 | 1152.51 | 3.326678 | 1152.51 | 3.326678 | 1152.51 | 3.326678 |
| 3.33     | 1152.51 | 3.33     | 1152.51 | 3.33     | 1152.51 | 3.33     | 1152.51 | 3.33     |
| 3.336678 | 1152.51 | 3.336678 | 1152.51 | 3.336678 | 1152.51 | 3.336678 | 1152.51 | 3.336678 |
| 3.34     | 1152.51 | 3.34     | 1152.51 | 3.34     | 1152.51 | 3.34     | 1152.51 | 3.34     |
| 3.346678 | 1152.51 | 3.346678 | 1152.51 | 3.346678 | 1152.51 | 3.346678 | 1152.51 | 3.346678 |
| 3.35     | 1152.51 | 3.35     | 1152.51 | 3.35     | 1152.51 | 3.35     | 1152.51 | 3.35     |
| 3.356678 | 1152.51 | 3.356678 | 1152.51 | 3.356678 | 1152.51 | 3.356678 | 1152.51 | 3.356678 |
| 3.36     | 1152.51 | 3.36     | 1152.51 | 3.36     | 1152.51 | 3.36     | 1152.51 | 3.36     |
| 3.366678 | 1152.51 | 3.366678 | 1152.51 | 3.366678 | 1152.51 | 3.366678 | 1152.51 | 3.366678 |
| 3.37     | 1152.51 | 3.37     | 1152.51 | 3.37     | 1152.51 | 3.37     | 1152.51 | 3.37     |
| 3.376678 | 1152.51 | 3.376678 | 1152.51 | 3.376678 | 1152.51 | 3.376678 | 1152.51 | 3.376678 |
| 3.38     | 1152.51 | 3.38     | 1152.51 | 3.38     | 1152.51 | 3.38     | 1152.51 | 3.38     |
| 3.386678 | 1152.51 | 3.386678 | 1152.51 | 3.386678 | 1152.51 | 3.386678 | 1152.51 | 3.386678 |
| 3.39     | 1152.51 | 3.39     | 1152.51 | 3.39     | 1152.51 | 3.39     | 1152.51 | 3.39     |
| 3.396678 | 1152.51 | 3.396678 | 1152.51 | 3.396678 | 1152.51 | 3.396678 | 1152.51 | 3.396678 |
| 3.4      | 1152.51 | 3.4      | 1152.51 | 3.4      | 1152.51 | 3.4      | 1152.51 | 3.4      |
| 3.406678 | 1152.51 | 3.406678 | 1152.51 | 3.406678 | 1152.51 | 3.406678 | 1152.51 | 3.406678 |
| 3.41     | 1152.51 | 3.41     | 1152.51 | 3.41     | 1152.51 | 3.41     | 1152.51 | 3.41     |
| 3.416678 | 1152.51 | 3.416678 | 1152.51 | 3.416678 | 1152.51 | 3.416678 | 1152.51 | 3.416678 |
| 3.42     | 1152.51 | 3.42     | 1152.51 | 3.42     | 1152.51 | 3.42     | 1152.51 | 3.42     |
| 3.426678 | 1152.51 | 3.426678 | 1152.51 | 3.426678 | 1152.51 | 3.426678 | 1152.51 | 3.426678 |
| 3.43     | 1152.51 | 3.43     | 1152.51 | 3.43     | 1152.51 | 3.43     | 1152.51 | 3.43     |
| 3.436678 | 1152.51 | 3.436678 | 1152.51 | 3.436678 | 1152.51 | 3.436678 | 1152.51 | 3.436678 |
| 3.44     | 1152.51 | 3.44     | 1152.51 | 3.44     | 1152.51 | 3.44     | 1152.51 | 3.44     |
| 3.446678 | 1152.51 | 3.446678 | 1152.51 | 3.446678 | 1152.51 | 3.446678 | 1152.51 | 3.446678 |
| 3.45     | 1152.51 | 3.45     | 1152.51 | 3.45     | 1152.51 | 3.45     | 1152.51 | 3.45     |
| 3.456678 | 1152.51 | 3.456678 | 1152.51 | 3.456678 | 1152.51 | 3.456678 | 1152.51 | 3.456678 |
| 3.46     | 1152.51 | 3.46     | 1152    |          |         |          |         |          |

|          |         |          |         |          |         |          |         |          |
|----------|---------|----------|---------|----------|---------|----------|---------|----------|
| 3.506678 | 1152.51 | 3.506678 | 1152.51 | 3.506678 | 1152.51 | 3.506678 | 1152.51 | 3.506678 |
| 3.51     | 1152.51 | 3.51     | 1152.51 | 3.51     | 1152.51 | 3.51     | 1152.51 | 3.51     |
| 3.516678 | 1152.51 | 3.516678 | 1152.51 | 3.516678 | 1152.51 | 3.516678 | 1152.51 | 3.516678 |
| 3.52     | 1152.51 | 3.52     | 1152.51 | 3.52     | 1152.51 | 3.52     | 1152.51 | 3.52     |
| 3.526678 | 1152.51 | 3.526678 | 1152.51 | 3.526678 | 1152.51 | 3.526678 | 1152.51 | 3.526678 |
| 3.53     | 1152.51 | 3.53     | 1152.51 | 3.53     | 1152.51 | 3.53     | 1152.51 | 3.53     |
| 3.536678 | 1152.51 | 3.536678 | 1152.51 | 3.536678 | 1152.51 | 3.536678 | 1152.51 | 3.536678 |
| 3.54     | 1152.51 | 3.54     | 1152.51 | 3.54     | 1152.51 | 3.54     | 1152.51 | 3.54     |
| 3.546678 | 1152.51 | 3.546678 | 1152.51 | 3.546678 | 1152.51 | 3.546678 | 1152.51 | 3.546678 |
| 3.55     | 1152.51 | 3.55     | 1152.51 | 3.55     | 1152.51 | 3.55     | 1152.51 | 3.55     |
| 3.556678 | 1152.51 | 3.556678 | 1152.51 | 3.556678 | 1152.51 | 3.556678 | 1152.51 | 3.556678 |
| 3.56     | 1152.51 | 3.56     | 1152.51 | 3.56     | 1152.51 | 3.56     | 1152.51 | 3.56     |
| 3.566678 | 1152.51 | 3.566678 | 1152.51 | 3.566678 | 1152.51 | 3.566678 | 1152.51 | 3.566678 |
| 3.57     | 1152.51 | 3.57     | 1152.51 | 3.57     | 1152.51 | 3.57     | 1152.51 | 3.57     |
| 3.576678 | 1152.51 | 3.576678 | 1152.51 | 3.576678 | 1152.51 | 3.576678 | 1152.51 | 3.576678 |
| 3.58     | 1152.51 | 3.58     | 1152.51 | 3.58     | 1152.51 | 3.58     | 1152.51 | 3.58     |
| 3.586678 | 1152.51 | 3.586678 | 1152.51 | 3.586678 | 1152.51 | 3.586678 | 1152.51 | 3.586678 |
| 3.59     | 1152.51 | 3.59     | 1152.51 | 3.59     | 1152.51 | 3.59     | 1152.51 | 3.59     |
| 3.596678 | 1152.51 | 3.596678 | 1152.51 | 3.596678 | 1152.51 | 3.596678 | 1152.51 | 3.596678 |
| 3.6      | 1152.51 | 3.6      | 1152.51 | 3.6      | 1152.51 | 3.6      | 1152.51 | 3.6      |
| 3.606678 | 1152.51 | 3.606678 | 1152.51 | 3.606678 | 1152.51 | 3.606678 | 1152.51 | 3.606678 |
| 3.61     | 1152.51 | 3.61     | 1152.51 | 3.61     | 1152.51 | 3.61     | 1152.51 | 3.61     |
| 3.616678 | 1152.51 | 3.616678 | 1152.51 | 3.616678 | 1152.51 | 3.616678 | 1152.51 | 3.616678 |
| 3.62     | 1152.51 | 3.62     | 1152.51 | 3.62     | 1152.51 | 3.62     | 1152.51 | 3.62     |
| 3.626678 | 1152.51 | 3.626678 | 1152.51 | 3.626678 | 1152.51 | 3.626678 | 1152.51 | 3.626678 |
| 3.63     | 1152.51 | 3.63     | 1152.51 | 3.63     | 1152.51 | 3.63     | 1152.51 | 3.63     |
| 3.636678 | 1152.51 | 3.636678 | 1152.51 | 3.636678 | 1152.51 | 3.636678 | 1152.51 | 3.636678 |
| 3.64     | 1152.51 | 3.64     | 1152.51 | 3.64     | 1152.51 | 3.64     | 1152.51 | 3.64     |
| 3.646678 | 1152.51 | 3.646678 | 1152.51 | 3.646678 | 1152.51 | 3.646678 | 1152.51 | 3.646678 |
| 3.65     | 1152.51 | 3.65     | 1152.51 | 3.65     | 1152.51 | 3.65     | 1152.51 | 3.65     |
| 3.656678 | 1152.51 | 3.656678 | 1152.51 | 3.656678 | 1152.51 | 3.656678 | 1152.51 | 3.656678 |
| 3.66     | 1152.51 | 3.66     | 1152.51 | 3.66     | 1152.51 | 3.66     | 1152.51 | 3.66     |
| 3.666678 | 1152.51 | 3.666678 | 1152.51 | 3.666678 | 1152.51 | 3.666678 | 1152.51 | 3.666678 |
| 3.67     | 1152.51 | 3.67     | 1152.51 | 3.67     | 1152.51 | 3.67     | 1152.51 | 3.67     |
| 3.676678 | 1152.51 | 3.676678 | 1152.51 | 3.676678 | 1152.51 | 3.676678 | 1152.51 | 3.676678 |
| 3.68     | 1152.51 | 3.68     | 1152.51 | 3.68     | 1152.51 | 3.68     | 1152.51 | 3.68     |
| 3.686678 | 1152.51 | 3.686678 | 1152.51 | 3.686678 | 1152.51 | 3.686678 | 1152.51 | 3.686678 |
| 3.69     | 1152.51 | 3.69     | 1152.51 | 3.69     | 1152.51 | 3.69     | 1152.51 | 3.69     |
| 3.696678 | 1152.51 | 3.696678 | 1152.51 | 3.696678 | 1152.51 | 3.696678 | 1152.51 | 3.696678 |
| 3.7      | 1152.51 | 3.7      | 1152.51 | 3.7      | 1152.51 | 3.7      | 1152.51 | 3.7      |
| 3.706678 | 1152.51 | 3.706678 | 1152.51 | 3.706678 | 1152.51 | 3.706678 | 1152.51 | 3.706678 |
| 3.71     | 1152.51 | 3.71     | 1152.51 | 3.71     | 1152.51 | 3.71     | 1152.51 | 3.71     |
| 3.716678 | 1152.51 | 3.716678 | 1152.51 | 3.716678 | 1152.51 | 3.716678 | 1152.51 | 3.716678 |
| 3.72     | 1152.51 | 3.72     | 1152.51 | 3.72     | 1152.51 | 3.72     | 1152.51 | 3.72     |
| 3.726678 | 1152.51 | 3.726678 | 1152.51 | 3.726678 | 1152.51 | 3.726678 | 1152.51 | 3.726678 |
| 3.73     | 1152.51 | 3.73     | 1152.51 | 3.73     | 1152.51 | 3.73     | 1152.51 | 3.73     |
| 3.736678 | 1152.51 | 3.736678 | 1152.51 | 3.736678 | 1152.51 | 3.736678 | 1152.51 | 3.736678 |



|          |         |          |         |          |         |          |         |          |
|----------|---------|----------|---------|----------|---------|----------|---------|----------|
| 3.74     | 1152.51 | 3.74     | 1152.51 | 3.74     | 1152.51 | 3.74     | 1152.51 | 3.74     |
| 3.746678 | 1152.51 | 3.746678 | 1152.51 | 3.746678 | 1152.51 | 3.746678 | 1152.51 | 3.746678 |
| 3.75     | 1152.51 | 3.75     | 1152.51 | 3.75     | 1152.51 | 3.75     | 1152.51 | 3.75     |
| 3.756678 | 1152.51 | 3.756678 | 1152.51 | 3.756678 | 1152.51 | 3.756678 | 1152.51 | 3.756678 |
| 3.76     | 1152.51 | 3.76     | 1152.51 | 3.76     | 1152.51 | 3.76     | 1152.51 | 3.76     |
| 3.766678 | 1152.51 | 3.766678 | 1152.51 | 3.766678 | 1152.51 | 3.766678 | 1152.51 | 3.766678 |
| 3.77     | 1152.51 | 3.77     | 1152.51 | 3.77     | 1152.51 | 3.77     | 1152.51 | 3.77     |
| 3.776678 | 1152.51 | 3.776678 | 1152.51 | 3.776678 | 1152.51 | 3.776678 | 1152.51 | 3.776678 |
| 3.78     | 1152.51 | 3.78     | 1152.51 | 3.78     | 1152.51 | 3.78     | 1152.51 | 3.78     |
| 3.786678 | 1152.51 | 3.786678 | 1152.51 | 3.786678 | 1152.51 | 3.786678 | 1152.51 | 3.786678 |
| 3.79     | 1152.51 | 3.79     | 1152.51 | 3.79     | 1152.51 | 3.79     | 1152.51 | 3.79     |
| 3.796678 | 1152.51 | 3.796678 | 1152.51 | 3.796678 | 1152.51 | 3.796678 | 1152.51 | 3.796678 |
| 3.8      | 1152.51 | 3.8      | 1152.51 | 3.8      | 1152.51 | 3.8      | 1152.51 | 3.8      |
| 3.806678 | 1152.51 | 3.806678 | 1152.51 | 3.806678 | 1152.51 | 3.806678 | 1152.51 | 3.806678 |
| 3.81     | 1152.51 | 3.81     | 1152.51 | 3.81     | 1152.51 | 3.81     | 1152.51 | 3.81     |
| 3.816678 | 1152.51 | 3.816678 | 1152.51 | 3.816678 | 1152.51 | 3.816678 | 1152.51 | 3.816678 |
| 3.82     | 1152.51 | 3.82     | 1152.51 | 3.82     | 1152.51 | 3.82     | 1152.51 | 3.82     |
| 3.826678 | 1152.51 | 3.826678 | 1152.51 | 3.826678 | 1152.51 | 3.826678 | 1152.51 | 3.826678 |
| 3.83     | 1152.51 | 3.83     | 1152.51 | 3.83     | 1152.51 | 3.83     | 1152.51 | 3.83     |
| 3.836678 | 1152.51 | 3.836678 | 1152.51 | 3.836678 | 1152.51 | 3.836678 | 1152.51 | 3.836678 |
| 3.84     | 1152.51 | 3.84     | 1152.51 | 3.84     | 1152.51 | 3.84     | 1152.51 | 3.84     |
| 3.846678 | 1152.51 | 3.846678 | 1152.51 | 3.846678 | 1152.51 | 3.846678 | 1152.51 | 3.846678 |
| 3.85     | 1152.51 | 3.85     | 1152.51 | 3.85     | 1152.51 | 3.85     | 1152.51 | 3.85     |
| 3.856678 | 1152.51 | 3.856678 | 1152.51 | 3.856678 | 1152.51 | 3.856678 | 1152.51 | 3.856678 |
| 3.86     | 1152.51 | 3.86     | 1152.51 | 3.86     | 1152.51 | 3.86     | 1152.51 | 3.86     |
| 3.866678 | 1152.51 | 3.866678 | 1152.51 | 3.866678 | 1152.51 | 3.866678 | 1152.51 | 3.866678 |
| 3.87     | 1152.51 | 3.87     | 1152.51 | 3.87     | 1152.51 | 3.87     | 1152.51 | 3.87     |
| 3.876678 | 1152.51 | 3.876678 | 1152.51 | 3.876678 | 1152.51 | 3.876678 | 1152.51 | 3.876678 |
| 3.88     | 1152.51 | 3.88     | 1152.51 | 3.88     | 1152.51 | 3.88     | 1152.51 | 3.88     |
| 3.886678 | 1152.51 | 3.886678 | 1152.51 | 3.886678 | 1152.51 | 3.886678 | 1152.51 | 3.886678 |
| 3.89     | 1152.51 | 3.89     | 1152.51 | 3.89     | 1152.51 | 3.89     | 1152.51 | 3.89     |
| 3.896678 | 1152.51 | 3.896678 | 1152.51 | 3.896678 | 1152.51 | 3.896678 | 1152.51 | 3.896678 |
| 3.9      | 1152.51 | 3.9      | 1152.51 | 3.9      | 1152.51 | 3.9      | 1152.51 | 3.9      |
| 3.906678 | 1152.51 | 3.906678 | 1152.51 | 3.906678 | 1152.51 | 3.906678 | 1152.51 | 3.906678 |
| 3.91     | 1152.51 | 3.91     | 1152.51 | 3.91     | 1152.51 | 3.91     | 1152.51 | 3.91     |
| 3.916678 | 1152.51 | 3.916678 | 1152.51 | 3.916678 | 1152.51 | 3.916678 | 1152.51 | 3.916678 |
| 3.92     | 1152.51 | 3.92     | 1152.51 | 3.92     | 1152.51 | 3.92     | 1152.51 | 3.92     |
| 3.926678 | 1152.51 | 3.926678 | 1152.51 | 3.926678 | 1152.51 | 3.926678 | 1152.51 | 3.926678 |
| 3.93     | 1152.51 | 3.93     | 1152    |          |         |          |         |          |

|          |         |          |         |          |         |          |         |          |
|----------|---------|----------|---------|----------|---------|----------|---------|----------|
| 3.976678 | 1152.51 | 3.976678 | 1152.51 | 3.976678 | 1152.51 | 3.976678 | 1152.51 | 3.976678 |
| 3.98     | 1152.51 | 3.98     | 1152.51 | 3.98     | 1152.51 | 3.98     | 1152.51 | 3.98     |
| 3.986678 | 1152.51 | 3.986678 | 1152.51 | 3.986678 | 1152.51 | 3.986678 | 1152.51 | 3.986678 |
| 3.99     | 1152.51 | 3.99     | 1152.51 | 3.99     | 1152.51 | 3.99     | 1152.51 | 3.99     |
| 3.996678 | 1152.51 | 3.996678 | 1152.51 | 3.996678 | 1152.51 | 3.996678 | 1152.51 | 3.996678 |
| 4        | 1152.51 | 4        | 1152.51 | 4        | 1152.51 | 4        | 1152.51 | 4        |
| 4.006678 | 1152.51 | 4.006678 | 1152.51 | 4.006678 | 1152.51 | 4.006678 | 1152.51 | 4.006678 |
| 4.01     | 1152.51 | 4.01     | 1152.51 | 4.01     | 1152.51 | 4.01     | 1152.51 | 4.01     |
| 4.016678 | 1152.51 | 4.016678 | 1152.51 | 4.016678 | 1152.51 | 4.016678 | 1152.51 | 4.016678 |
| 4.02     | 1152.51 | 4.02     | 1152.51 | 4.02     | 1152.51 | 4.02     | 1152.51 | 4.02     |
| 4.026678 | 1152.51 | 4.026678 | 1152.51 | 4.026678 | 1152.51 | 4.026678 | 1152.51 | 4.026678 |
| 4.03     | 1152.51 | 4.03     | 1152.51 | 4.03     | 1152.51 | 4.03     | 1152.51 | 4.03     |
| 4.036678 | 1152.51 | 4.036678 | 1152.51 | 4.036678 | 1152.51 | 4.036678 | 1152.51 | 4.036678 |
| 4.04     | 1152.51 | 4.04     | 1152.51 | 4.04     | 1152.51 | 4.04     | 1152.51 | 4.04     |
| 4.046678 | 1152.51 | 4.046678 | 1152.51 | 4.046678 | 1152.51 | 4.046678 | 1152.51 | 4.046678 |
| 4.05     | 1152.51 | 4.05     | 1152.51 | 4.05     | 1152.51 | 4.05     | 1152.51 | 4.05     |
| 4.056678 | 1152.51 | 4.056678 | 1152.51 | 4.056678 | 1152.51 | 4.056678 | 1152.51 | 4.056678 |
| 4.06     | 1152.51 | 4.06     | 1152.51 | 4.06     | 1152.51 | 4.06     | 1152.51 | 4.06     |
| 4.066678 | 1152.51 | 4.066678 | 1152.51 | 4.066678 | 1152.51 | 4.066678 | 1152.51 | 4.066678 |
| 4.07     | 1152.51 | 4.07     | 1152.51 | 4.07     | 1152.51 | 4.07     | 1152.51 | 4.07     |
| 4.076678 | 1152.51 | 4.076678 | 1152.51 | 4.076678 | 1152.51 | 4.076678 | 1152.51 | 4.076678 |
| 4.08     | 1152.51 | 4.08     | 1152.51 | 4.08     | 1152.51 | 4.08     | 1152.51 | 4.08     |
| 4.086678 | 1152.51 | 4.086678 | 1152.51 | 4.086678 | 1152.51 | 4.086678 | 1152.51 | 4.086678 |
| 4.09     | 1152.51 | 4.09     | 1152.51 | 4.09     | 1152.51 | 4.09     | 1152.51 | 4.09     |
| 4.096678 | 1152.51 | 4.096678 | 1152.51 | 4.096678 | 1152.51 | 4.096678 | 1152.51 | 4.096678 |
| 4.1      | 1152.51 | 4.1      | 1152.51 | 4.1      | 1152.51 | 4.1      | 1152.51 | 4.1      |
| 4.106678 | 1152.51 | 4.106678 | 1152.51 | 4.106678 | 1152.51 | 4.106678 | 1152.51 | 4.106678 |
| 4.11     | 1152.51 | 4.11     | 1152.51 | 4.11     | 1152.51 | 4.11     | 1152.51 | 4.11     |
| 4.116678 | 1152.51 | 4.116678 | 1152.51 | 4.116678 | 1152.51 | 4.116678 | 1152.51 | 4.116678 |
| 4.12     | 1152.51 | 4.12     | 1152.51 | 4.12     | 1152.51 | 4.12     | 1152.51 | 4.12     |
| 4.126678 | 1152.51 | 4.126678 | 1152.51 | 4.126678 | 1152.51 | 4.126678 | 1152.51 | 4.126678 |
| 4.13     | 1152.51 | 4.13     | 1152.51 | 4.13     | 1152.51 | 4.13     | 1152.51 | 4.13     |
| 4.136678 | 1152.51 | 4.136678 | 1152.51 | 4.136678 | 1152.51 | 4.136678 | 1152.51 | 4.136678 |
| 4.14     | 1152.51 | 4.14     | 1152.51 | 4.14     | 1152.51 | 4.14     | 1152.51 | 4.14     |
| 4.146678 | 1152.51 | 4.146678 | 1152.51 | 4.146678 | 1152.51 | 4.146678 | 1152.51 | 4.146678 |
| 4.15     | 1152.51 | 4.15     | 1152.51 | 4.15     | 1152.51 | 4.15     | 1152.51 | 4.15     |
| 4.156678 | 1152.51 | 4.156678 | 1152.51 | 4.156678 | 1152.51 | 4.156678 | 1152.51 | 4.156678 |
| 4.16     | 1152.51 | 4.16     | 1152.51 | 4.16     | 1152.51 | 4.16     | 1152.51 | 4.16     |
| 4.166678 | 1152.51 | 4.166678 | 1152.5  |          |         |          |         |          |

|          |         |          |         |          |         |          |         |          |
|----------|---------|----------|---------|----------|---------|----------|---------|----------|
| 4.21     | 1152.51 | 4.21     | 1152.51 | 4.21     | 1152.51 | 4.21     | 1152.51 | 4.21     |
| 4.216678 | 1152.51 | 4.216678 | 1152.51 | 4.216678 | 1152.51 | 4.216678 | 1152.51 | 4.216678 |
| 4.22     | 1152.51 | 4.22     | 1152.51 | 4.22     | 1152.51 | 4.22     | 1152.51 | 4.22     |
| 4.226678 | 1152.51 | 4.226678 | 1152.51 | 4.226678 | 1152.51 | 4.226678 | 1152.51 | 4.226678 |
| 4.23     | 1152.51 | 4.23     | 1152.51 | 4.23     | 1152.51 | 4.23     | 1152.51 | 4.23     |
| 4.236678 | 1152.51 | 4.236678 | 1152.51 | 4.236678 | 1152.51 | 4.236678 | 1152.51 | 4.236678 |
| 4.24     | 1152.51 | 4.24     | 1152.51 | 4.24     | 1152.51 | 4.24     | 1152.51 | 4.24     |
| 4.246678 | 1152.51 | 4.246678 | 1152.51 | 4.246678 | 1152.51 | 4.246678 | 1152.51 | 4.246678 |
| 4.25     | 1152.51 | 4.25     | 1152.51 | 4.25     | 1152.51 | 4.25     | 1152.51 | 4.25     |
| 4.256678 | 1152.51 | 4.256678 | 1152.51 | 4.256678 | 1152.51 | 4.256678 | 1152.51 | 4.256678 |
| 4.26     | 1152.51 | 4.26     | 1152.51 | 4.26     | 1152.51 | 4.26     | 1152.51 | 4.26     |
| 4.266678 | 1152.51 | 4.266678 | 1152.51 | 4.266678 | 1152.51 | 4.266678 | 1152.51 | 4.266678 |
| 4.27     | 1152.51 | 4.27     | 1152.51 | 4.27     | 1152.51 | 4.27     | 1152.51 | 4.27     |
| 4.276678 | 1152.51 | 4.276678 | 1152.51 | 4.276678 | 1152.51 | 4.276678 | 1152.51 | 4.276678 |
| 4.28     | 1152.51 | 4.28     | 1152.51 | 4.28     | 1152.51 | 4.28     | 1152.51 | 4.28     |
| 4.286678 | 1152.51 | 4.286678 | 1152.51 | 4.286678 | 1152.51 | 4.286678 | 1152.51 | 4.286678 |
| 4.29     | 1152.51 | 4.29     | 1152.51 | 4.29     | 1152.51 | 4.29     | 1152.51 | 4.29     |
| 4.296678 | 1152.51 | 4.296678 | 1152.51 | 4.296678 | 1152.51 | 4.296678 | 1152.51 | 4.296678 |
| 4.3      | 1152.51 | 4.3      | 1152.51 | 4.3      | 1152.51 | 4.3      | 1152.51 | 4.3      |
| 4.306678 | 1152.51 | 4.306678 | 1152.51 | 4.306678 | 1152.51 | 4.306678 | 1152.51 | 4.306678 |
| 4.31     | 1152.51 | 4.31     | 1152.51 | 4.31     | 1152.51 | 4.31     | 1152.51 | 4.31     |
| 4.316678 | 1152.51 | 4.316678 | 1152.51 | 4.316678 | 1152.51 | 4.316678 | 1152.51 | 4.316678 |
| 4.32     | 1152.51 | 4.32     | 1152.51 | 4.32     | 1152.51 | 4.32     | 1152.51 | 4.32     |
| 4.326678 | 1152.51 | 4.326678 | 1152.51 | 4.326678 | 1152.51 | 4.326678 | 1152.51 | 4.326678 |
| 4.33     | 1152.51 | 4.33     | 1152.51 | 4.33     | 1152.51 | 4.33     | 1152.51 | 4.33     |
| 4.336678 | 1152.51 | 4.336678 | 1152.51 | 4.336678 | 1152.51 | 4.336678 | 1152.51 | 4.336678 |
| 4.34     | 1152.51 | 4.34     | 1152.51 | 4.34     | 1152.51 | 4.34     | 1152.51 | 4.34     |
| 4.346678 | 1152.51 | 4.346678 | 1152.51 | 4.346678 | 1152.51 | 4.346678 | 1152.51 | 4.346678 |
| 4.35     | 1152.51 | 4.35     | 1152.51 | 4.35     | 1152.51 | 4.35     | 1152.51 | 4.35     |
| 4.356678 | 1152.51 | 4.356678 | 1152.51 | 4.356678 | 1152.51 | 4.356678 | 1152.51 | 4.356678 |
| 4.36     | 1152.51 | 4.36     | 1152.51 | 4.36     | 1152.51 | 4.36     | 1152.51 | 4.36     |
| 4.366678 | 1152.51 | 4.366678 | 1152.51 | 4.366678 | 1152.51 | 4.366678 | 1152.51 | 4.366678 |
| 4.37     | 1152.51 | 4.37     | 1152.51 | 4.37     | 1152.51 | 4.37     | 1152.51 | 4.37     |
| 4.376678 | 1152.51 | 4.376678 | 1152.51 | 4.376678 | 1152.51 | 4.376678 | 1152.51 | 4.376678 |
| 4.38     | 1152.51 | 4.38     | 1152.51 | 4.38     | 1152.51 | 4.38     | 1152.51 | 4.38     |
| 4.386678 | 1152.51 | 4.386678 | 1152.51 | 4.386678 | 1152.51 | 4.386678 | 1152.51 | 4.386678 |
| 4.39     | 1152.51 | 4.39     | 1152.51 | 4.39     | 1152.51 | 4.39     | 1152.51 | 4.39     |
| 4.396678 | 1152.51 | 4.396678 | 1152.51 | 4.396678 | 1152.51 | 4.396678 | 1152.51 | 4.396678 |
| 4.4      | 1152.51 | 4.4      | 1152.51 | 4.4      | 1152.51 | 4.4      | 1152.51 | 4.4      |
| 4.406678 | 1152.51 | 4.406678 | 1152.51 | 4.406678 | 1152.51 | 4.406678 | 1152.51 | 4.406678 |
| 4.41     | 1152.51 | 4.41     | 1152.51 | 4.41     | 1152.51 | 4.41     | 1152.51 | 4.41     |
| 4.416678 | 1152.51 | 4.416678 | 1152.51 | 4.416678 | 1152.51 | 4.416678 | 1152.51 | 4.416678 |
| 4.42     | 1152.51 | 4.42     | 1152.51 | 4.42     | 1152.51 | 4.42     | 1152.51 | 4.42     |
| 4.426678 | 1152.51 | 4.426678 | 1152.51 | 4.426678 | 1152.51 | 4.426678 | 1152.51 | 4.426678 |
| 4.43     | 1152.51 | 4.43     | 1152.51 | 4.43     | 1152.51 | 4.43     | 1152.51 | 4.43     |
| 4.436678 | 1152.51 | 4.436678 | 1152.51 | 4.436678 | 1152.51 | 4.436678 | 1152.51 | 4.436678 |
| 4.44     | 1152.51 | 4.44     | 1152.51 | 4.44     | 1152.51 | 4.44     | 1152.51 | 4.44     |

|          |         |            |         |          |         |          |         |          |
|----------|---------|------------|---------|----------|---------|----------|---------|----------|
| 4.446678 | 1152.51 | 4.446678   | 1152.51 | 4.446678 | 1152.51 | 4.446678 | 1152.51 | 4.446678 |
| 4.45     | 1152.51 | 4.45       | 1152.51 | 4.45     | 1152.51 | 4.45     | 1152.51 | 4.45     |
| 4.456678 | 1152.51 | 4.456678   | 1152.51 | 4.456678 | 1152.51 | 4.456678 | 1152.51 | 4.456678 |
| 4.46     | 1152.51 | 4.46       | 1152.51 | 4.46     | 1152.51 | 4.46     | 1152.51 | 4.46     |
| 4.466678 | 1152.51 | 4.466678   | 1152.51 | 4.466678 | 1152.51 | 4.466678 | 1152.51 | 4.466678 |
| 4.47     | 1152.51 | 4.47       | 1152.51 | 4.47     | 1152.51 | 4.47     | 1152.51 | 4.47     |
| 4.476678 | 1152.51 | 4.476678   | 1152.51 | 4.476678 | 1152.51 | 4.476678 | 1152.51 | 4.476678 |
| 4.48     | 1152.51 | 4.48       | 1152.51 | 4.48     | 1152.51 | 4.48     | 1152.51 | 4.48     |
| 4.486678 | 1152.51 | 4.486678   | 1152.51 | 4.486678 | 1152.51 | 4.486678 | 1152.51 | 4.486678 |
| 4.49     | 1152.51 | 4.49       | 1152.51 | 4.49     | 1152.51 | 4.49     | 1152.51 | 4.49     |
| 4.496678 | 1152.51 | 4.496678   | 1152.51 | 4.496678 | 1152.51 | 4.496678 | 1152.51 | 4.496678 |
| 4.5      | 1152.51 | 4.5        | 1152.51 | 4.5      | 1152.51 | 4.5      | 1152.51 | 4.5      |
| 4.506678 | 1152.51 | 4.506678   | 1152.51 | 4.506678 | 1152.51 | 4.506678 | 1152.51 | 4.506678 |
| 4.51     | 1152.51 | 4.51       | 1152.51 | 4.51     | 1152.51 | 4.51     | 1152.51 | 4.51     |
| 4.516678 | 1152.51 | 4.516678   | 1152.51 | 4.516678 | 1152.51 | 4.516678 | 1152.51 | 4.516678 |
| 4.52     | 1152.51 | 4.52       | 1152.51 | 4.52     | 1152.51 | 4.52     | 1152.51 | 4.52     |
| 4.526678 | 1152.51 | 4.526678   | 1152.51 | 4.526678 | 1152.51 | 4.526678 | 1152.51 | 4.526678 |
| 4.53     | 1152.51 | 4.53       | 1152.51 | 4.53     | 1152.51 | 4.53     | 1152.51 | 4.53     |
| 4.536678 | 1152.51 | 4.536678   | 1152.51 | 4.536678 | 1152.51 | 4.536678 | 1152.51 | 4.536678 |
| 4.54     | 1152.51 | 4.54       | 1152.51 | 4.54     | 1152.51 | 4.54     | 1152.51 | 4.54     |
| 4.546678 | 1152.51 | 4.546678   | 1152.51 | 4.546678 | 1152.51 | 4.546678 | 1152.51 | 4.546678 |
| 4.55     | 1152.51 | 4.55       | 1152.51 | 4.55     | 1152.51 | 4.55     | 1152.51 | 4.55     |
| 4.556678 | 1152.51 | 4.556678   | 1152.51 | 4.556678 | 1152.51 | 4.556678 | 1152.51 | 4.556678 |
| 4.56     | 1152.51 | 4.56       | 1152.51 | 4.56     | 1152.51 | 4.56     | 1152.51 | 4.56     |
| 4.566678 | 1152.51 | 4.566678   | 1152.51 | 4.566678 | 1152.51 | 4.566678 | 1152.51 | 4.566678 |
| 4.57     | 1152.51 | 4.57       | 1152.51 | 4.57     | 1152.51 | 4.57     | 1152.51 | 4.57     |
| 4.576678 | 1152.51 | 4.576678   | 1152.51 | 4.576678 | 1152.51 | 4.576678 | 1152.51 | 4.576678 |
| 4.58     | 1152.51 | 4.58       | 1152.51 | 4.58     | 1152.51 | 4.58     | 1152.51 | 4.58     |
| 4.586678 | 1152.51 | 4.586678   | 1152.51 | 4.586678 | 1152.51 | 4.586678 | 1152.51 | 4.586678 |
| 4.59     | 1152.51 | 4.59       | 1152.51 | 4.59     | 1152.51 | 4.59     | 1152.51 | 4.59     |
| 4.596678 | 1152.51 | 4.596678   | 1152.51 | 4.596678 | 1152.51 | 4.596678 | 1152.51 | 4.596678 |
| 4.6      | 1152.51 | 4.6        | 1152.51 | 4.6      | 1152.51 | 4.6      | 1152.51 | 4.6      |
| 4.606678 | 1152.51 | 4.606678   | 1152.51 | 4.606678 | 1152.51 | 4.606678 | 1152.51 | 4.606678 |
| 4.61     | 1152.51 | 4.61       | 1152.51 | 4.61     | 1152.51 | 4.61     | 1152.51 | 4.61     |
| 4.616678 | 1152.51 | 4.616678   | 1152.51 | 4.616678 | 1152.51 | 4.616678 | 1152.51 | 4.616678 |
| 4.62     | 1152.51 | 4.62       | 1152.51 | 4.62     | 1152.51 | 4.62     | 1152.51 | 4.62     |
| 4.626678 | 1152.51 | 4.626678   | 1152.51 | 4.626678 | 1152.51 | 4.626678 | 1152.51 | 4.626678 |
| 4.63     | 1152.51 | 4.63       | 1152.51 | 4.63     | 1152.51 | 4.63     | 1152.51 | 4.63     |
| 4.636678 | 1152.51 | 4.636678</ |         |          |         |          |         |          |

|          |         |          |         |          |         |          |         |          |
|----------|---------|----------|---------|----------|---------|----------|---------|----------|
| 4.68     | 1152.51 | 4.68     | 1152.51 | 4.68     | 1152.51 | 4.68     | 1152.51 | 4.68     |
| 4.686678 | 1152.51 | 4.686678 | 1152.51 | 4.686678 | 1152.51 | 4.686678 | 1152.51 | 4.686678 |
| 4.69     | 1152.51 | 4.69     | 1152.51 | 4.69     | 1152.51 | 4.69     | 1152.51 | 4.69     |
| 4.696678 | 1152.51 | 4.696678 | 1152.51 | 4.696678 | 1152.51 | 4.696678 | 1152.51 | 4.696678 |
| 4.7      | 1152.51 | 4.7      | 1152.51 | 4.7      | 1152.51 | 4.7      | 1152.51 | 4.7      |
| 4.706678 | 1152.51 | 4.706678 | 1152.51 | 4.706678 | 1152.51 | 4.706678 | 1152.51 | 4.706678 |
| 4.71     | 1152.51 | 4.71     | 1152.51 | 4.71     | 1152.51 | 4.71     | 1152.51 | 4.71     |
| 4.716678 | 1152.51 | 4.716678 | 1152.51 | 4.716678 | 1152.51 | 4.716678 | 1152.51 | 4.716678 |
| 4.72     | 1152.51 | 4.72     | 1152.51 | 4.72     | 1152.51 | 4.72     | 1152.51 | 4.72     |
| 4.726678 | 1152.51 | 4.726678 | 1152.51 | 4.726678 | 1152.51 | 4.726678 | 1152.51 | 4.726678 |
| 4.73     | 1152.51 | 4.73     | 1152.51 | 4.73     | 1152.51 | 4.73     | 1152.51 | 4.73     |
| 4.736678 | 1152.51 | 4.736678 | 1152.51 | 4.736678 | 1152.51 | 4.736678 | 1152.51 | 4.736678 |
| 4.74     | 1152.51 | 4.74     | 1152.51 | 4.74     | 1152.51 | 4.74     | 1152.51 | 4.74     |
| 4.746678 | 1152.51 | 4.746678 | 1152.51 | 4.746678 | 1152.51 | 4.746678 | 1152.51 | 4.746678 |
| 4.75     | 1152.51 | 4.75     | 1152.51 | 4.75     | 1152.51 | 4.75     | 1152.51 | 4.75     |
| 4.756678 | 1152.51 | 4.756678 | 1152.51 | 4.756678 | 1152.51 | 4.756678 | 1152.51 | 4.756678 |
| 4.76     | 1152.51 | 4.76     | 1152.51 | 4.76     | 1152.51 | 4.76     | 1152.51 | 4.76     |
| 4.766678 | 1152.51 | 4.766678 | 1152.51 | 4.766678 | 1152.51 | 4.766678 | 1152.51 | 4.766678 |
| 4.77     | 1152.51 | 4.77     | 1152.51 | 4.77     | 1152.51 | 4.77     | 1152.51 | 4.77     |
| 4.776678 | 1152.51 | 4.776678 | 1152.51 | 4.776678 | 1152.51 | 4.776678 | 1152.51 | 4.776678 |
| 4.78     | 1152.51 | 4.78     | 1152.51 | 4.78     | 1152.51 | 4.78     | 1152.51 | 4.78     |
| 4.786678 | 1152.51 | 4.786678 | 1152.51 | 4.786678 | 1152.51 | 4.786678 | 1152.51 | 4.786678 |
| 4.79     | 1152.51 | 4.79     | 1152.51 | 4.79     | 1152.51 | 4.79     | 1152.51 | 4.79     |
| 4.796678 | 1152.51 | 4.796678 | 1152.51 | 4.796678 | 1152.51 | 4.796678 | 1152.51 | 4.796678 |
| 4.8      | 1152.51 | 4.8      | 1152.51 | 4.8      | 1152.51 | 4.8      | 1152.51 | 4.8      |
| 4.806678 | 1152.51 | 4.806678 | 1152.51 | 4.806678 | 1152.51 | 4.806678 | 1152.51 | 4.806678 |
| 4.81     | 1152.51 | 4.81     | 1152.51 | 4.81     | 1152.51 | 4.81     | 1152.51 | 4.81     |
| 4.816678 | 1152.51 | 4.816678 | 1152.51 | 4.816678 | 1152.51 | 4.816678 | 1152.51 | 4.816678 |
| 4.82     | 1152.51 | 4.82     | 1152.51 | 4.82     | 1152.51 | 4.82     | 1152.51 | 4.82     |
| 4.826678 | 1152.51 | 4.826678 | 1152.51 | 4.826678 | 1152.51 | 4.826678 | 1152.51 | 4.826678 |
| 4.83     | 1152.51 | 4.83     | 1152.51 | 4.83     | 1152.51 | 4.83     | 1152.51 | 4.83     |
| 4.836678 | 1152.51 | 4.836678 | 1152.51 | 4.836678 | 1152.51 | 4.836678 | 1152.51 | 4.836678 |
| 4.84     | 1152.51 | 4.84     | 1152.51 | 4.84     | 1152.51 | 4.84     | 1152.51 | 4.84     |
| 4.846678 | 1152.51 | 4.846678 | 1152.51 | 4.846678 | 1152.51 | 4.846678 | 1152.51 | 4.846678 |
| 4.85     | 1152.51 | 4.85     | 1152.51 | 4.85     | 1152.51 | 4.85     | 1152.51 | 4.85     |
| 4.856678 | 1152.51 | 4.856678 | 1152.51 | 4.856678 | 1152.51 | 4.856678 | 1152.51 | 4.856678 |
| 4.86     | 1152.51 | 4.86     | 1152.51 | 4.86     | 1152.51 | 4.86     | 1152.51 | 4.86     |
| 4.866678 | 1152.51 | 4.866678 | 1152.51 | 4.866678 | 1152.51 | 4.866678 | 1152.51 | 4.866678 |
| 4.87     | 1152.51 | 4.87     | 1152    |          |         |          |         |          |

|          |         |          |         |          |         |          |         |          |
|----------|---------|----------|---------|----------|---------|----------|---------|----------|
| 4.916678 | 1152.51 | 4.916678 | 1152.51 | 4.916678 | 1152.51 | 4.916678 | 1152.51 | 4.916678 |
| 4.92     | 1152.51 | 4.92     | 1152.51 | 4.92     | 1152.51 | 4.92     | 1152.51 | 4.92     |
| 4.926678 | 1152.51 | 4.926678 | 1152.51 | 4.926678 | 1152.51 | 4.926678 | 1152.51 | 4.926678 |
| 4.93     | 1152.51 | 4.93     | 1152.51 | 4.93     | 1152.51 | 4.93     | 1152.51 | 4.93     |
| 4.936678 | 1152.51 | 4.936678 | 1152.51 | 4.936678 | 1152.51 | 4.936678 | 1152.51 | 4.936678 |
| 4.94     | 1152.51 | 4.94     | 1152.51 | 4.94     | 1152.51 | 4.94     | 1152.51 | 4.94     |
| 4.946678 | 1152.51 | 4.946678 | 1152.51 | 4.946678 | 1152.51 | 4.946678 | 1152.51 | 4.946678 |
| 4.95     | 1152.51 | 4.95     | 1152.51 | 4.95     | 1152.51 | 4.95     | 1152.51 | 4.95     |
| 4.956678 | 1152.51 | 4.956678 | 1152.51 | 4.956678 | 1152.51 | 4.956678 | 1152.51 | 4.956678 |
| 4.96     | 1152.51 | 4.96     | 1152.51 | 4.96     | 1152.51 | 4.96     | 1152.51 | 4.96     |
| 4.966678 | 1152.51 | 4.966678 | 1152.51 | 4.966678 | 1152.51 | 4.966678 | 1152.51 | 4.966678 |
| 4.97     | 1152.51 | 4.97     | 1152.51 | 4.97     | 1152.51 | 4.97     | 1152.51 | 4.97     |
| 4.976678 | 1152.51 | 4.976678 | 1152.51 | 4.976678 | 1152.51 | 4.976678 | 1152.51 | 4.976678 |
| 4.98     | 1152.51 | 4.98     | 1152.51 | 4.98     | 1152.51 | 4.98     | 1152.51 | 4.98     |
| 4.986678 | 1152.51 | 4.986678 | 1152.51 | 4.986678 | 1152.51 | 4.986678 | 1152.51 | 4.986678 |
| 4.99     | 1152.51 | 4.99     | 1152.51 | 4.99     | 1152.51 | 4.99     | 1152.51 | 4.99     |
| 4.996678 | 1152.51 | 4.996678 | 1152.51 | 4.996678 | 1152.51 | 4.996678 | 1152.51 | 4.996678 |
| 5        | 1152.51 | 5        | 1152.51 | 5        | 1152.51 | 5        | 1152.51 | 5        |
| 5.006678 | 1152.51 | 5.006678 | 1152.51 | 5.006678 | 1152.51 | 5.006678 | 1152.51 | 5.006678 |
| 5.01     | 1152.51 | 5.01     | 1152.51 | 5.01     | 1152.51 | 5.01     | 1152.51 | 5.01     |
| 5.016678 | 1152.51 | 5.016678 | 1152.51 | 5.016678 | 1152.51 | 5.016678 | 1152.51 | 5.016678 |
| 5.02     | 1152.51 | 5.02     | 1152.51 | 5.02     | 1152.51 | 5.02     | 1152.51 | 5.02     |
| 5.026678 | 1152.51 | 5.026678 | 1152.51 | 5.026678 | 1152.51 | 5.026678 | 1152.51 | 5.026678 |
| 5.03     | 1152.51 | 5.03     | 1152.51 | 5.03     | 1152.51 | 5.03     | 1152.51 | 5.03     |
| 5.036678 | 1152.51 | 5.036678 | 1152.51 | 5.036678 | 1152.51 | 5.036678 | 1152.51 | 5.036678 |
| 5.04     | 1152.51 | 5.04     | 1152.51 | 5.04     | 1152.51 | 5.04     | 1152.51 | 5.04     |
| 5.046678 | 1152.51 | 5.046678 | 1152.51 | 5.046678 | 1152.51 | 5.046678 | 1152.51 | 5.046678 |
| 5.05     | 1152.51 | 5.05     | 1152.51 | 5.05     | 1152.51 | 5.05     | 1152.51 | 5.05     |
| 5.056678 | 1152.51 | 5.056678 | 1152.51 | 5.056678 | 1152.51 | 5.056678 | 1152.51 | 5.056678 |
| 5.06     | 1152.51 | 5.06     | 1152.51 | 5.06     | 1152.51 | 5.06     | 1152.51 | 5.06     |
| 5.066678 | 1152.51 | 5.066678 | 1152.51 | 5.066678 | 1152.51 | 5.066678 | 1152.51 | 5.066678 |
| 5.07     | 1152.51 | 5.07     | 1152.51 | 5.07     | 1152.51 | 5.07     | 1152.51 | 5.07     |
| 5.076678 | 1152.51 | 5.076678 | 1152.51 | 5.076678 | 1152.51 | 5.076678 | 1152.51 | 5.076678 |
| 5.08     | 1152.51 | 5.08     | 1152.51 | 5.08     | 1152.51 | 5.08     | 1152.51 | 5.08     |
| 5.086678 | 1152.51 | 5.086678 | 1152.51 | 5.086678 | 1152.51 | 5.086678 | 1152.51 | 5.086678 |
| 5.09     | 1152.51 | 5.09     | 1152.51 | 5.09     | 1152.51 | 5.09     | 1152.51 | 5.09     |
| 5.096678 | 1152.51 | 5.096678 | 1152.51 | 5.096678 | 1152.51 | 5.096678 | 1152.51 | 5.096678 |
| 5.1      | 1152.51 | 5.1      | 1152.51 | 5.1      | 1152.51 | 5.1      | 1152.51 | 5.1      |
| 5.106678 | 1152.51 | 5.106678 | 1152.51 | 5.106678 | 1152.51 | 5.106678 | 1152.51 | 5.106678 |
| 5.11     | 1152.51 | 5.11     | 1152.51 | 5.11     | 1152.51 | 5.11     | 1152.51 | 5.11     |
| 5.116678 | 1152.51 | 5.116678 | 1152.51 | 5.116678 | 1152.51 | 5.116678 | 1152.51 | 5.116678 |
| 5.12     | 1152.51 | 5.12     | 1152.51 | 5.12     | 1152.51 | 5.12     | 1152.51 | 5.12     |
| 5.126678 | 1152.51 | 5.126678 | 1152.51 | 5.126678 | 1152.51 | 5.126678 | 1152.51 | 5.126678 |
| 5.13     | 1152.51 | 5.13     | 1152.51 | 5.13     | 1152.51 | 5.13     | 1152.51 | 5.13     |
| 5.136678 | 1152.51 | 5.136678 | 1152.51 | 5.136678 | 1152.51 | 5.136678 | 1152.51 | 5.136678 |
| 5.14     | 1152.51 | 5.14     | 1152.51 | 5.14     | 1152.51 | 5.14     | 1152.51 | 5.14     |
| 5.146678 | 1152.51 | 5.146678 | 1152.51 | 5.146678 | 1152.51 | 5.146678 | 1152.51 | 5.146678 |

|          |         |          |         |          |         |          |         |          |
|----------|---------|----------|---------|----------|---------|----------|---------|----------|
| 5.15     | 1152.51 | 5.15     | 1152.51 | 5.15     | 1152.51 | 5.15     | 1152.51 | 5.15     |
| 5.156678 | 1152.51 | 5.156678 | 1152.51 | 5.156678 | 1152.51 | 5.156678 | 1152.51 | 5.156678 |
| 5.16     | 1152.51 | 5.16     | 1152.51 | 5.16     | 1152.51 | 5.16     | 1152.51 | 5.16     |
| 5.166678 | 1152.51 | 5.166678 | 1152.51 | 5.166678 | 1152.51 | 5.166678 | 1152.51 | 5.166678 |
| 5.17     | 1152.51 | 5.17     | 1152.51 | 5.17     | 1152.51 | 5.17     | 1152.51 | 5.17     |
| 5.176678 | 1152.51 | 5.176678 | 1152.51 | 5.176678 | 1152.51 | 5.176678 | 1152.51 | 5.176678 |
| 5.18     | 1152.51 | 5.18     | 1152.51 | 5.18     | 1152.51 | 5.18     | 1152.51 | 5.18     |
| 5.186678 | 1152.51 | 5.186678 | 1152.51 | 5.186678 | 1152.51 | 5.186678 | 1152.51 | 5.186678 |
| 5.19     | 1152.51 | 5.19     | 1152.51 | 5.19     | 1152.51 | 5.19     | 1152.51 | 5.19     |
| 5.196678 | 1152.51 | 5.196678 | 1152.51 | 5.196678 | 1152.51 | 5.196678 | 1152.51 | 5.196678 |
| 5.2      | 1152.51 | 5.2      | 1152.51 | 5.2      | 1152.51 | 5.2      | 1152.51 | 5.2      |
| 5.206678 | 1152.51 | 5.206678 | 1152.51 | 5.206678 | 1152.51 | 5.206678 | 1152.51 | 5.206678 |
| 5.21     | 1152.51 | 5.21     | 1152.51 | 5.21     | 1152.51 | 5.21     | 1152.51 | 5.21     |
| 5.216678 | 1152.51 | 5.216678 | 1152.51 | 5.216678 | 1152.51 | 5.216678 | 1152.51 | 5.216678 |
| 5.22     | 1152.51 | 5.22     | 1152.51 | 5.22     | 1152.51 | 5.22     | 1152.51 | 5.22     |
| 5.226678 | 1152.51 | 5.226678 | 1152.51 | 5.226678 | 1152.51 | 5.226678 | 1152.51 | 5.226678 |
| 5.23     | 1152.51 | 5.23     | 1152.51 | 5.23     | 1152.51 | 5.23     | 1152.51 | 5.23     |
| 5.236678 | 1152.51 | 5.236678 | 1152.51 | 5.236678 | 1152.51 | 5.236678 | 1152.51 | 5.236678 |
| 5.24     | 1152.51 | 5.24     | 1152.51 | 5.24     | 1152.51 | 5.24     | 1152.51 | 5.24     |
| 5.246678 | 1152.51 | 5.246678 | 1152.51 | 5.246678 | 1152.51 | 5.246678 | 1152.51 | 5.246678 |
| 5.25     | 1152.51 | 5.25     | 1152.51 | 5.25     | 1152.51 | 5.25     | 1152.51 | 5.25     |
| 5.256678 | 1152.51 | 5.256678 | 1152.51 | 5.256678 | 1152.51 | 5.256678 | 1152.51 | 5.256678 |
| 5.26     | 1152.51 | 5.26     | 1152.51 | 5.26     | 1152.51 | 5.26     | 1152.51 | 5.26     |
| 5.266678 | 1152.51 | 5.266678 | 1152.51 | 5.266678 | 1152.51 | 5.266678 | 1152.51 | 5.266678 |
| 5.27     | 1152.51 | 5.27     | 1152.51 | 5.27     | 1152.51 | 5.27     | 1152.51 | 5.27     |
| 5.276678 | 1152.51 | 5.276678 | 1152.51 | 5.276678 | 1152.51 | 5.276678 | 1152.51 | 5.276678 |
| 5.28     | 1152.51 | 5.28     | 1152.51 | 5.28     | 1152.51 | 5.28     | 1152.51 | 5.28     |
| 5.286678 | 1152.51 | 5.286678 | 1152.51 | 5.286678 | 1152.51 | 5.286678 | 1152.51 | 5.286678 |
| 5.29     | 1152.51 | 5.29     | 1152.51 | 5.29     | 1152.51 | 5.29     | 1152.51 | 5.29     |
| 5.296678 | 1152.51 | 5.296678 | 1152.51 | 5.296678 | 1152.51 | 5.296678 | 1152.51 | 5.296678 |
| 5.3      | 1152.51 | 5.3      | 1152.51 | 5.3      | 1152.51 | 5.3      | 1152.51 | 5.3      |
| 5.306678 | 1152.51 | 5.306678 | 1152.51 | 5.306678 | 1152.51 | 5.306678 | 1152.51 | 5.306678 |
| 5.31     | 1152.51 | 5.31     | 1152.51 | 5.31     | 1152.51 | 5.31     | 1152.51 | 5.31     |
| 5.316678 | 1152.51 | 5.316678 | 1152.51 | 5.316678 | 1152.51 | 5.316678 | 1152.51 | 5.316678 |
| 5.32     | 1152.51 | 5.32     | 1152.51 | 5.32     | 1152.51 | 5.32     | 1152.51 | 5.32     |
| 5.326678 | 1152.51 | 5.326678 | 1152.51 | 5.326678 | 1152.51 | 5.326678 | 1152.51 | 5.326678 |
| 5.33     | 1152.51 | 5.33     | 1152.51 | 5.33     | 1152.51 | 5.33     | 1152.51 | 5.33     |
| 5.336678 | 1152.51 | 5.336678 | 1152.51 | 5.336678 | 1152.51 | 5.336678 | 1152.51 | 5.336678 |
| 5.34     | 1152.51 | 5.34     | 1152.51 | 5.34     | 1152.51 | 5.34     | 1152.51 | 5.34     |
| 5.346678 | 1152.51 | 5.346678 | 1152.51 | 5.346678 | 1152.51 | 5.346678 | 1152.51 | 5.346678 |
| 5.35     | 1152.51 | 5.35     | 1152.51 | 5.35     | 1152.51 | 5.35     | 1152.51 | 5.35     |
| 5.356678 | 1152.51 | 5.356678 | 1152.51 | 5.356678 | 1152.51 | 5.356678 | 1152.51 | 5.356678 |
| 5.36     | 1152.51 | 5.36     | 1152.51 | 5.36     | 1152.51 | 5.36     | 1152.51 | 5.36     |
| 5.366678 | 1152.51 | 5.366678 | 1152.51 | 5.366678 | 1152.51 | 5.366678 | 1152.51 | 5.366678 |
| 5.37     | 1152.51 | 5.37     | 1152.51 | 5.37     | 1152.51 | 5.37     | 1152.51 | 5.37     |
| 5.376678 | 1152.51 | 5.376678 | 1152.51 | 5.376678 | 1152.51 | 5.376678 | 1152.51 | 5.376678 |
| 5.38     | 1152.51 | 5.38     | 1152.51 | 5.38     | 1152.51 | 5.38     | 1152.51 | 5.38     |

|          |         |          |         |          |         |          |         |          |
|----------|---------|----------|---------|----------|---------|----------|---------|----------|
| 5.386678 | 1152.51 | 5.386678 | 1152.51 | 5.386678 | 1152.51 | 5.386678 | 1152.51 | 5.386678 |
| 5.39     | 1152.51 | 5.39     | 1152.51 | 5.39     | 1152.51 | 5.39     | 1152.51 | 5.39     |
| 5.396678 | 1152.51 | 5.396678 | 1152.51 | 5.396678 | 1152.51 | 5.396678 | 1152.51 | 5.396678 |
| 5.4      | 1152.51 | 5.4      | 1152.51 | 5.4      | 1152.51 | 5.4      | 1152.51 | 5.4      |
| 5.406678 | 1152.51 | 5.406678 | 1152.51 | 5.406678 | 1152.51 | 5.406678 | 1152.51 | 5.406678 |
| 5.41     | 1152.51 | 5.41     | 1152.51 | 5.41     | 1152.51 | 5.41     | 1152.51 | 5.41     |
| 5.416678 | 1152.51 | 5.416678 | 1152.51 | 5.416678 | 1152.51 | 5.416678 | 1152.51 | 5.416678 |
| 5.42     | 1152.51 | 5.42     | 1152.51 | 5.42     | 1152.51 | 5.42     | 1152.51 | 5.42     |
| 5.426678 | 1152.51 | 5.426678 | 1152.51 | 5.426678 | 1152.51 | 5.426678 | 1152.51 | 5.426678 |
| 5.43     | 1152.51 | 5.43     | 1152.51 | 5.43     | 1152.51 | 5.43     | 1152.51 | 5.43     |
| 5.436678 | 1152.51 | 5.436678 | 1152.51 | 5.436678 | 1152.51 | 5.436678 | 1152.51 | 5.436678 |
| 5.44     | 1152.51 | 5.44     | 1152.51 | 5.44     | 1152.51 | 5.44     | 1152.51 | 5.44     |
| 5.446678 | 1152.51 | 5.446678 | 1152.51 | 5.446678 | 1152.51 | 5.446678 | 1152.51 | 5.446678 |
| 5.45     | 1152.51 | 5.45     | 1152.51 | 5.45     | 1152.51 | 5.45     | 1152.51 | 5.45     |
| 5.456678 | 1152.51 | 5.456678 | 1152.51 | 5.456678 | 1152.51 | 5.456678 | 1152.51 | 5.456678 |
| 5.46     | 1152.51 | 5.46     | 1152.51 | 5.46     | 1152.51 | 5.46     | 1152.51 | 5.46     |
| 5.466678 | 1152.51 | 5.466678 | 1152.51 | 5.466678 | 1152.51 | 5.466678 | 1152.51 | 5.466678 |
| 5.47     | 1152.51 | 5.47     | 1152.51 | 5.47     | 1152.51 | 5.47     | 1152.51 | 5.47     |
| 5.476678 | 1152.51 | 5.476678 | 1152.51 | 5.476678 | 1152.51 | 5.476678 | 1152.51 | 5.476678 |
| 5.48     | 1152.51 | 5.48     | 1152.51 | 5.48     | 1152.51 | 5.48     | 1152.51 | 5.48     |
| 5.486678 | 1152.51 | 5.486678 | 1152.51 | 5.486678 | 1152.51 | 5.486678 | 1152.51 | 5.486678 |
| 5.49     | 1152.51 | 5.49     | 1152.51 | 5.49     | 1152.51 | 5.49     | 1152.51 | 5.49     |
| 5.496678 | 1152.51 | 5.496678 | 1152.51 | 5.496678 | 1152.51 | 5.496678 | 1152.51 | 5.496678 |
| 5.5      | 1152.51 | 5.5      | 1152.51 | 5.5      | 1152.51 | 5.5      | 1152.51 | 5.5      |
| 5.506678 | 1152.51 | 5.506678 | 1152.51 | 5.506678 | 1152.51 | 5.506678 | 1152.51 | 5.506678 |
| 5.51     | 1152.51 | 5.51     | 1152.51 | 5.51     | 1152.51 | 5.51     | 1152.51 | 5.51     |
| 5.516678 | 1152.51 | 5.516678 | 1152.51 | 5.516678 | 1152.51 | 5.516678 | 1152.51 | 5.516678 |
| 5.52     | 1152.51 | 5.52     | 1152.51 | 5.52     | 1152.51 | 5.52     | 1152.51 | 5.52     |
| 5.526678 | 1152.51 | 5.526678 | 1152.51 | 5.526678 | 1152.51 | 5.526678 | 1152.51 | 5.526678 |
| 5.53     | 1152.51 | 5.53     | 1152.51 | 5.53     | 1152.51 | 5.53     | 1152.51 | 5.53     |
| 5.536678 | 1152.51 | 5.536678 | 1152.51 | 5.536678 | 1152.51 | 5.536678 | 1152.51 | 5.536678 |
| 5.54     | 1152.51 | 5.54     | 1152.51 | 5.54     | 1152.51 | 5.54     | 1152.51 | 5.54     |
| 5.546678 | 1152.51 | 5.546678 | 1152.51 | 5.546678 | 1152.51 | 5.546678 | 1152.51 | 5.546678 |
| 5.55     | 1152.51 | 5.55     | 1152.51 | 5.55     | 1152.51 | 5.55     | 1152.51 | 5.55     |
| 5.556678 | 1152.51 | 5.556678 | 1152.51 | 5.556678 | 1152.51 | 5.556678 | 1152.51 | 5.556678 |
| 5.56     | 1152.51 | 5.56     | 1152.51 | 5.56     | 1152.51 | 5.56     | 1152.51 | 5.56     |
| 5.566678 | 1152.51 | 5.566678 | 1152.51 | 5.566678 | 1152.51 | 5.566678 | 1152.51 | 5.566678 |
| 5.57     | 1152.51 | 5.57     | 1152.51 | 5.57     | 1152.51 | 5.57     | 1152.51 | 5.57     |
| 5.576678 | 1152.51 | 5.576678 | 1152.51 | 5.576678 | 1152.51 | 5.576678 | 1152.51 | 5.576678 |
| 5.58     | 1152.51 | 5.58     | 1152.51 | 5.58     | 1152.51 | 5.58     | 1152.51 | 5.58     |
| 5.586678 | 1152.51 | 5.586678 | 1152.51 | 5.586678 | 1152.51 | 5.586678 | 1152.51 | 5.586678 |
| 5.59     | 1152.51 | 5.59     | 1152.51 | 5.59     | 1152.51 | 5.59     | 1152.51 | 5.59     |
| 5.596678 | 1152.51 | 5.596678 | 1152.51 | 5.596678 | 1152.51 | 5.596678 | 1152.51 | 5.596678 |
| 5.6      | 1152.51 | 5.6      | 1152.51 | 5.6      | 1152.51 | 5.6      | 1152.51 | 5.6      |
| 5.606678 | 1152.51 | 5.606678 | 1152.51 | 5.606678 | 1152.51 | 5.606678 | 1152.51 | 5.606678 |
| 5.61     | 1152.51 | 5.61     | 1152.51 | 5.61     | 1152.51 | 5.61     | 1152.51 | 5.61     |
| 5.616678 | 1152.51 | 5.616678 | 1152.51 | 5.616678 | 1152.51 | 5.616678 | 1152.51 | 5.616678 |



|          |         |          |         |          |         |          |         |          |
|----------|---------|----------|---------|----------|---------|----------|---------|----------|
| 5.62     | 1152.51 | 5.62     | 1152.51 | 5.62     | 1152.51 | 5.62     | 1152.51 | 5.62     |
| 5.626678 | 1152.51 | 5.626678 | 1152.51 | 5.626678 | 1152.51 | 5.626678 | 1152.51 | 5.626678 |
| 5.63     | 1152.51 | 5.63     | 1152.51 | 5.63     | 1152.51 | 5.63     | 1152.51 | 5.63     |
| 5.636678 | 1152.51 | 5.636678 | 1152.51 | 5.636678 | 1152.51 | 5.636678 | 1152.51 | 5.636678 |
| 5.64     | 1152.51 | 5.64     | 1152.51 | 5.64     | 1152.51 | 5.64     | 1152.51 | 5.64     |
| 5.646678 | 1152.51 | 5.646678 | 1152.51 | 5.646678 | 1152.51 | 5.646678 | 1152.51 | 5.646678 |
| 5.65     | 1152.51 | 5.65     | 1152.51 | 5.65     | 1152.51 | 5.65     | 1152.51 | 5.65     |
| 5.656678 | 1152.51 | 5.656678 | 1152.51 | 5.656678 | 1152.51 | 5.656678 | 1152.51 | 5.656678 |
| 5.66     | 1152.51 | 5.66     | 1152.51 | 5.66     | 1152.51 | 5.66     | 1152.51 | 5.66     |
| 5.666678 | 1152.51 | 5.666678 | 1152.51 | 5.666678 | 1152.51 | 5.666678 | 1152.51 | 5.666678 |
| 5.67     | 1152.51 | 5.67     | 1152.51 | 5.67     | 1152.51 | 5.67     | 1152.51 | 5.67     |
| 5.676678 | 1152.51 | 5.676678 | 1152.51 | 5.676678 | 1152.51 | 5.676678 | 1152.51 | 5.676678 |
| 5.68     | 1152.51 | 5.68     | 1152.51 | 5.68     | 1152.51 | 5.68     | 1152.51 | 5.68     |
| 5.686678 | 1152.51 | 5.686678 | 1152.51 | 5.686678 | 1152.51 | 5.686678 | 1152.51 | 5.686678 |
| 5.69     | 1152.51 | 5.69     | 1152.51 | 5.69     | 1152.51 | 5.69     | 1152.51 | 5.69     |
| 5.696678 | 1152.51 | 5.696678 | 1152.51 | 5.696678 | 1152.51 | 5.696678 | 1152.51 | 5.696678 |
| 5.7      | 1152.51 | 5.7      | 1152.51 | 5.7      | 1152.51 | 5.7      | 1152.51 | 5.7      |
| 5.706678 | 1152.51 | 5.706678 | 1152.51 | 5.706678 | 1152.51 | 5.706678 | 1152.51 | 5.706678 |
| 5.71     | 1152.51 | 5.71     | 1152.51 | 5.71     | 1152.51 | 5.71     | 1152.51 | 5.71     |
| 5.716678 | 1152.51 | 5.716678 | 1152.51 | 5.716678 | 1152.51 | 5.716678 | 1152.51 | 5.716678 |
| 5.72     | 1152.51 | 5.72     | 1152.51 | 5.72     | 1152.51 | 5.72     | 1152.51 | 5.72     |
| 5.726678 | 1152.51 | 5.726678 | 1152.51 | 5.726678 | 1152.51 | 5.726678 | 1152.51 | 5.726678 |
| 5.73     | 1152.51 | 5.73     | 1152.51 | 5.73     | 1152.51 | 5.73     | 1152.51 | 5.73     |
| 5.736678 | 1152.51 | 5.736678 | 1152.51 | 5.736678 | 1152.51 | 5.736678 | 1152.51 | 5.736678 |
| 5.74     | 1152.51 | 5.74     | 1152.51 | 5.74     | 1152.51 | 5.74     | 1152.51 | 5.74     |
| 5.746678 | 1152.51 | 5.746678 | 1152.51 | 5.746678 | 1152.51 | 5.746678 | 1152.51 | 5.746678 |
| 5.75     | 1152.51 | 5.75     | 1152.51 | 5.75     | 1152.51 | 5.75     | 1152.51 | 5.75     |
| 5.756678 | 1152.51 | 5.756678 | 1152.51 | 5.756678 | 1152.51 | 5.756678 | 1152.51 | 5.756678 |
| 5.76     | 1152.51 | 5.76     | 1152.51 | 5.76     | 1152.51 | 5.76     | 1152.51 | 5.76     |
| 5.766678 | 1152.51 | 5.766678 | 1152.51 | 5.766678 | 1152.51 | 5.766678 | 1152.51 | 5.766678 |
| 5.77     | 1152.51 | 5.77     | 1152.51 | 5.77     | 1152.51 | 5.77     | 1152.51 | 5.77     |
| 5.776678 | 1152.51 | 5.776678 | 1152.51 | 5.776678 | 1152.51 | 5.776678 | 1152.51 | 5.776678 |
| 5.78     | 1152.51 | 5.78     | 1152.51 | 5.78     | 1152.51 | 5.78     | 1152.51 | 5.78     |
| 5.786678 | 1152.51 | 5.786678 | 1152.51 | 5.786678 | 1152.51 | 5.786678 | 1152.51 | 5.786678 |
| 5.79     | 1152.51 | 5.79     | 1152.51 | 5.79     | 1152.51 | 5.79     | 1152.51 | 5.79     |
| 5.796678 | 1152.51 | 5.796678 | 1152.51 | 5.796678 | 1152.51 | 5.796678 | 1152.51 | 5.796678 |
| 5.8      | 1152.51 | 5.8      | 1152.51 | 5.8      | 1152.51 | 5.8      | 1152.51 | 5.8      |
| 5.806678 | 1152.51 | 5.806678 | 1152.51 | 5.806678 | 1152.51 | 5.806678 | 1152.51 | 5.806678 |
| 5.81     | 1152.51 | 5.81     | 1152.51 | 5.81     | 1152.51 | 5.81     | 1152.51 | 5.81     |
| 5.816678 | 1152.51 | 5.816678 | 1152.51 | 5.816678 | 1152.51 | 5.816678 | 1152.51 | 5.816678 |
| 5.82     | 1152.51 | 5.82     | 1152.51 | 5.82     | 1152.51 | 5.82     | 1152.51 | 5.82     |
| 5.826678 | 1152.51 | 5.826678 | 1152.51 | 5.826678 | 1152.51 | 5.826678 | 1152.51 | 5.826678 |
| 5.83     | 1152.51 | 5.83     | 1152.51 | 5.83     | 1152.51 | 5.83     | 1152.51 | 5.83     |
| 5.836678 | 1152.51 | 5.836678 | 1152.51 | 5.836678 | 1152.51 | 5.836678 | 1152.51 | 5.836678 |
| 5.84     | 1152.51 | 5.84     | 1152.51 | 5.84     | 1152.51 | 5.84     | 1152.51 | 5.84     |
| 5.846678 | 1152.51 | 5.846678 | 1152.51 | 5.846678 | 1152.51 | 5.846678 | 1152.51 | 5.846678 |
| 5.85     | 1152.51 | 5.85     | 1152.51 | 5.85     | 1152.51 | 5.85     | 1152.51 | 5.85     |

|          |         |          |         |          |         |          |         |          |
|----------|---------|----------|---------|----------|---------|----------|---------|----------|
| 5.856678 | 1152.51 | 5.856678 | 1152.51 | 5.856678 | 1152.51 | 5.856678 | 1152.51 | 5.856678 |
| 5.86     | 1152.51 | 5.86     | 1152.51 | 5.86     | 1152.51 | 5.86     | 1152.51 | 5.86     |
| 5.866678 | 1152.51 | 5.866678 | 1152.51 | 5.866678 | 1152.51 | 5.866678 | 1152.51 | 5.866678 |
| 5.87     | 1152.51 | 5.87     | 1152.51 | 5.87     | 1152.51 | 5.87     | 1152.51 | 5.87     |
| 5.876678 | 1152.51 | 5.876678 | 1152.51 | 5.876678 | 1152.51 | 5.876678 | 1152.51 | 5.876678 |
| 5.88     | 1152.51 | 5.88     | 1152.51 | 5.88     | 1152.51 | 5.88     | 1152.51 | 5.88     |
| 5.886678 | 1152.51 | 5.886678 | 1152.51 | 5.886678 | 1152.51 | 5.886678 | 1152.51 | 5.886678 |
| 5.89     | 1152.51 | 5.89     | 1152.51 | 5.89     | 1152.51 | 5.89     | 1152.51 | 5.89     |
| 5.896678 | 1152.51 | 5.896678 | 1152.51 | 5.896678 | 1152.51 | 5.896678 | 1152.51 | 5.896678 |
| 5.9      | 1152.51 | 5.9      | 1152.51 | 5.9      | 1152.51 | 5.9      | 1152.51 | 5.9      |
| 5.906678 | 1152.51 | 5.906678 | 1152.51 | 5.906678 | 1152.51 | 5.906678 | 1152.51 | 5.906678 |
| 5.91     | 1152.51 | 5.91     | 1152.51 | 5.91     | 1152.51 | 5.91     | 1152.51 | 5.91     |
| 5.916678 | 1152.51 | 5.916678 | 1152.51 | 5.916678 | 1152.51 | 5.916678 | 1152.51 | 5.916678 |
| 5.92     | 1152.51 | 5.92     | 1152.51 | 5.92     | 1152.51 | 5.92     | 1152.51 | 5.92     |
| 5.926678 | 1152.51 | 5.926678 | 1152.51 | 5.926678 | 1152.51 | 5.926678 | 1152.51 | 5.926678 |
| 5.93     | 1152.51 | 5.93     | 1152.51 | 5.93     | 1152.51 | 5.93     | 1152.51 | 5.93     |
| 5.936678 | 1152.51 | 5.936678 | 1152.51 | 5.936678 | 1152.51 | 5.936678 | 1152.51 | 5.936678 |
| 5.94     | 1152.51 | 5.94     | 1152.51 | 5.94     | 1152.51 | 5.94     | 1152.51 | 5.94     |
| 5.946678 | 1152.51 | 5.946678 | 1152.51 | 5.946678 | 1152.51 | 5.946678 | 1152.51 | 5.946678 |
| 5.95     | 1152.51 | 5.95     | 1152.51 | 5.95     | 1152.51 | 5.95     | 1152.51 | 5.95     |
| 5.956678 | 1152.51 | 5.956678 | 1152.51 | 5.956678 | 1152.51 | 5.956678 | 1152.51 | 5.956678 |
| 5.96     | 1152.51 | 5.96     | 1152.51 | 5.96     | 1152.51 | 5.96     | 1152.51 | 5.96     |
| 5.966678 | 1152.51 | 5.966678 | 1152.51 | 5.966678 | 1152.51 | 5.966678 | 1152.51 | 5.966678 |
| 5.97     | 1152.51 | 5.97     | 1152.51 | 5.97     | 1152.51 | 5.97     | 1152.51 | 5.97     |
| 5.976678 | 1152.51 | 5.976678 | 1152.51 | 5.976678 | 1152.51 | 5.976678 | 1152.51 | 5.976678 |
| 5.98     | 1152.51 | 5.98     | 1152.51 | 5.98     | 1152.51 | 5.98     | 1152.51 | 5.98     |
| 5.986678 | 1152.51 | 5.986678 | 1152.51 | 5.986678 | 1152.51 | 5.986678 | 1152.51 | 5.986678 |
| 5.99     | 1152.51 | 5.99     | 1152.51 | 5.99     | 1152.51 | 5.99     | 1152.51 | 5.99     |
| 5.996678 | 1152.51 | 5.996678 | 1152.51 | 5.996678 | 1152.51 | 5.996678 | 1152.51 | 5.996678 |
| 6        | 1152.51 | 6        | 1152.51 | 6        | 1152.51 | 6        | 1152.51 | 6        |
| 6.006678 | 1152.51 | 6.006678 | 1152.51 | 6.006678 | 1152.51 | 6.006678 | 1152.51 | 6.006678 |
| 6.01     | 1152.51 | 6.01     | 1152.51 | 6.01     | 1152.51 | 6.01     | 1152.51 | 6.01     |
| 6.016678 | 1152.51 | 6.016678 | 1152.51 | 6.016678 | 1152.51 | 6.016678 | 1152.51 | 6.016678 |
| 6.02     | 1152.51 | 6.02     | 1152.51 | 6.02     | 1152.51 | 6.02     | 1152.51 | 6.02     |
| 6.026678 | 1152.51 | 6.026678 | 1152.51 | 6.026678 | 1152.51 | 6.026678 | 1152.51 | 6.026678 |
| 6.03     | 1152.51 | 6.03     | 1152.51 | 6.03     | 1152.51 | 6.03     | 1152.51 | 6.03     |
| 6.036678 | 1152.51 | 6.036678 | 1152.51 | 6.036678 | 1152.51 | 6.036678 | 1152.51 | 6.036678 |
| 6.04     | 1152.51 | 6.04     | 1152.51 | 6.04     | 1152.51 | 6.04     | 1152.51 | 6.04     |
| 6.046678 | 1152.51 | 6.046678 | 1152.5  |          |         |          |         |          |

|          |         |          |         |          |         |          |         |          |
|----------|---------|----------|---------|----------|---------|----------|---------|----------|
| 6.09     | 1152.51 | 6.09     | 1152.51 | 6.09     | 1152.51 | 6.09     | 1152.51 | 6.09     |
| 6.096678 | 1152.51 | 6.096678 | 1152.51 | 6.096678 | 1152.51 | 6.096678 | 1152.51 | 6.096678 |
| 6.1      | 1152.51 | 6.1      | 1152.51 | 6.1      | 1152.51 | 6.1      | 1152.51 | 6.1      |
| 6.106678 | 1152.51 | 6.106678 | 1152.51 | 6.106678 | 1152.51 | 6.106678 | 1152.51 | 6.106678 |
| 6.11     | 1152.51 | 6.11     | 1152.51 | 6.11     | 1152.51 | 6.11     | 1152.51 | 6.11     |
| 6.116678 | 1152.51 | 6.116678 | 1152.51 | 6.116678 | 1152.51 | 6.116678 | 1152.51 | 6.116678 |
| 6.12     | 1152.51 | 6.12     | 1152.51 | 6.12     | 1152.51 | 6.12     | 1152.51 | 6.12     |
| 6.126678 | 1152.51 | 6.126678 | 1152.51 | 6.126678 | 1152.51 | 6.126678 | 1152.51 | 6.126678 |
| 6.13     | 1152.51 | 6.13     | 1152.51 | 6.13     | 1152.51 | 6.13     | 1152.51 | 6.13     |
| 6.136678 | 1152.51 | 6.136678 | 1152.51 | 6.136678 | 1152.51 | 6.136678 | 1152.51 | 6.136678 |
| 6.14     | 1152.51 | 6.14     | 1152.51 | 6.14     | 1152.51 | 6.14     | 1152.51 | 6.14     |
| 6.146678 | 1152.51 | 6.146678 | 1152.51 | 6.146678 | 1152.51 | 6.146678 | 1152.51 | 6.146678 |
| 6.15     | 1152.51 | 6.15     | 1152.51 | 6.15     | 1152.51 | 6.15     | 1152.51 | 6.15     |
| 6.156678 | 1152.51 | 6.156678 | 1152.51 | 6.156678 | 1152.51 | 6.156678 | 1152.51 | 6.156678 |
| 6.16     | 1152.51 | 6.16     | 1152.51 | 6.16     | 1152.51 | 6.16     | 1152.51 | 6.16     |
| 6.166678 | 1152.51 | 6.166678 | 1152.51 | 6.166678 | 1152.51 | 6.166678 | 1152.51 | 6.166678 |
| 6.17     | 1152.51 | 6.17     | 1152.51 | 6.17     | 1152.51 | 6.17     | 1152.51 | 6.17     |
| 6.176678 | 1152.51 | 6.176678 | 1152.51 | 6.176678 | 1152.51 | 6.176678 | 1152.51 | 6.176678 |
| 6.18     | 1152.51 | 6.18     | 1152.51 | 6.18     | 1152.51 | 6.18     | 1152.51 | 6.18     |
| 6.186678 | 1152.51 | 6.186678 | 1152.51 | 6.186678 | 1152.51 | 6.186678 | 1152.51 | 6.186678 |
| 6.19     | 1152.51 | 6.19     | 1152.51 | 6.19     | 1152.51 | 6.19     | 1152.51 | 6.19     |
| 6.196678 | 1152.51 | 6.196678 | 1152.51 | 6.196678 | 1152.51 | 6.196678 | 1152.51 | 6.196678 |
| 6.2      | 1152.51 | 6.2      | 1152.51 | 6.2      | 1152.51 | 6.2      | 1152.51 | 6.2      |
| 6.206678 | 1152.51 | 6.206678 | 1152.51 | 6.206678 | 1152.51 | 6.206678 | 1152.51 | 6.206678 |
| 6.21     | 1152.51 | 6.21     | 1152.51 | 6.21     | 1152.51 | 6.21     | 1152.51 | 6.21     |
| 6.216678 | 1152.51 | 6.216678 | 1152.51 | 6.216678 | 1152.51 | 6.216678 | 1152.51 | 6.216678 |
| 6.22     | 1152.51 | 6.22     | 1152.51 | 6.22     | 1152.51 | 6.22     | 1152.51 | 6.22     |
| 6.226678 | 1152.51 | 6.226678 | 1152.51 | 6.226678 | 1152.51 | 6.226678 | 1152.51 | 6.226678 |
| 6.23     | 1152.51 | 6.23     | 1152.51 | 6.23     | 1152.51 | 6.23     | 1152.51 | 6.23     |
| 6.236678 | 1152.51 | 6.236678 | 1152.51 | 6.236678 | 1152.51 | 6.236678 | 1152.51 | 6.236678 |
| 6.24     | 1152.51 | 6.24     | 1152.51 | 6.24     | 1152.51 | 6.24     | 1152.51 | 6.24     |
| 6.246678 | 1152.51 | 6.246678 | 1152.51 | 6.246678 | 1152.51 | 6.246678 | 1152.51 | 6.246678 |
| 6.25     | 1152.51 | 6.25     | 1152.51 | 6.25     | 1152.51 | 6.25     | 1152.51 | 6.25     |
| 6.256678 | 1152.51 | 6.256678 | 1152.51 | 6.256678 | 1152.51 | 6.256678 | 1152.51 | 6.256678 |
| 6.26     | 1152.51 | 6.26     | 1152.51 | 6.26     | 1152.51 | 6.26     | 1152.51 | 6.26     |
| 6.266678 | 1152.51 | 6.266678 | 1152.51 | 6.266678 | 1152.51 | 6.266678 | 1152.51 | 6.266678 |
| 6.27     | 1152.51 | 6.27     | 1152.51 | 6.27     | 1152.51 | 6.27     | 1152.51 | 6.27     |
| 6.276678 | 1152.51 | 6.276678 | 1152.51 | 6.276678 | 1152.51 | 6.276678 | 1152.51 | 6.276678 |
| 6.28     | 1152.51 | 6.28     | 1152.51 | 6.28     | 1152.51 | 6.28     | 1152.51 | 6.28     |
| 6.286678 | 1152.51 | 6.286678 | 1152.51 | 6.286678 | 1152.51 | 6.286678 | 1152.51 | 6.286678 |
| 6.29     | 1152.51 | 6.29     | 1152.51 | 6.29     | 1152.51 | 6.29     | 1152.51 | 6.29     |
| 6.296678 | 1152.51 | 6.296678 | 1152.51 | 6.296678 | 1152.51 | 6.296678 | 1152.51 | 6.296678 |
| 6.3      | 1152.51 | 6.3      | 1152.51 | 6.3      | 1152.51 | 6.3      | 1152.51 | 6.3      |
| 6.306678 | 1152.51 | 6.306678 | 1152.51 | 6.306678 | 1152.51 | 6.306678 | 1152.51 | 6.306678 |
| 6.31     | 1152.51 | 6.31     | 1152.51 | 6.31     | 1152.51 | 6.31     | 1152.51 | 6.31     |
| 6.316678 | 1152.51 | 6.316678 | 1152.51 | 6.316678 | 1152.51 | 6.316678 | 1152.51 | 6.316678 |
| 6.32     | 1152.51 | 6.32     | 1152.51 | 6.32     | 1152.51 | 6.32     | 1152.51 | 6.32     |

|          |         |            |         |          |         |          |         |          |
|----------|---------|------------|---------|----------|---------|----------|---------|----------|
| 6.326678 | 1152.51 | 6.326678   | 1152.51 | 6.326678 | 1152.51 | 6.326678 | 1152.51 | 6.326678 |
| 6.33     | 1152.51 | 6.33       | 1152.51 | 6.33     | 1152.51 | 6.33     | 1152.51 | 6.33     |
| 6.336678 | 1152.51 | 6.336678   | 1152.51 | 6.336678 | 1152.51 | 6.336678 | 1152.51 | 6.336678 |
| 6.34     | 1152.51 | 6.34       | 1152.51 | 6.34     | 1152.51 | 6.34     | 1152.51 | 6.34     |
| 6.346678 | 1152.51 | 6.346678   | 1152.51 | 6.346678 | 1152.51 | 6.346678 | 1152.51 | 6.346678 |
| 6.35     | 1152.51 | 6.35       | 1152.51 | 6.35     | 1152.51 | 6.35     | 1152.51 | 6.35     |
| 6.356678 | 1152.51 | 6.356678   | 1152.51 | 6.356678 | 1152.51 | 6.356678 | 1152.51 | 6.356678 |
| 6.36     | 1152.51 | 6.36       | 1152.51 | 6.36     | 1152.51 | 6.36     | 1152.51 | 6.36     |
| 6.366678 | 1152.51 | 6.366678   | 1152.51 | 6.366678 | 1152.51 | 6.366678 | 1152.51 | 6.366678 |
| 6.37     | 1152.51 | 6.37       | 1152.51 | 6.37     | 1152.51 | 6.37     | 1152.51 | 6.37     |
| 6.376678 | 1152.51 | 6.376678   | 1152.51 | 6.376678 | 1152.51 | 6.376678 | 1152.51 | 6.376678 |
| 6.38     | 1152.51 | 6.38       | 1152.51 | 6.38     | 1152.51 | 6.38     | 1152.51 | 6.38     |
| 6.386678 | 1152.51 | 6.386678   | 1152.51 | 6.386678 | 1152.51 | 6.386678 | 1152.51 | 6.386678 |
| 6.39     | 1152.51 | 6.39       | 1152.51 | 6.39     | 1152.51 | 6.39     | 1152.51 | 6.39     |
| 6.396678 | 1152.51 | 6.396678   | 1152.51 | 6.396678 | 1152.51 | 6.396678 | 1152.51 | 6.396678 |
| 6.4      | 1152.51 | 6.4        | 1152.51 | 6.4      | 1152.51 | 6.4      | 1152.51 | 6.4      |
| 6.406678 | 1152.51 | 6.406678   | 1152.51 | 6.406678 | 1152.51 | 6.406678 | 1152.51 | 6.406678 |
| 6.41     | 1152.51 | 6.41       | 1152.51 | 6.41     | 1152.51 | 6.41     | 1152.51 | 6.41     |
| 6.416678 | 1152.51 | 6.416678   | 1152.51 | 6.416678 | 1152.51 | 6.416678 | 1152.51 | 6.416678 |
| 6.42     | 1152.51 | 6.42       | 1152.51 | 6.42     | 1152.51 | 6.42     | 1152.51 | 6.42     |
| 6.426678 | 1152.51 | 6.426678   | 1152.51 | 6.426678 | 1152.51 | 6.426678 | 1152.51 | 6.426678 |
| 6.43     | 1152.51 | 6.43       | 1152.51 | 6.43     | 1152.51 | 6.43     | 1152.51 | 6.43     |
| 6.436678 | 1152.51 | 6.436678   | 1152.51 | 6.436678 | 1152.51 | 6.436678 | 1152.51 | 6.436678 |
| 6.44     | 1152.51 | 6.44       | 1152.51 | 6.44     | 1152.51 | 6.44     | 1152.51 | 6.44     |
| 6.446678 | 1152.51 | 6.446678   | 1152.51 | 6.446678 | 1152.51 | 6.446678 | 1152.51 | 6.446678 |
| 6.45     | 1152.51 | 6.45       | 1152.51 | 6.45     | 1152.51 | 6.45     | 1152.51 | 6.45     |
| 6.456678 | 1152.51 | 6.456678   | 1152.51 | 6.456678 | 1152.51 | 6.456678 | 1152.51 | 6.456678 |
| 6.46     | 1152.51 | 6.46       | 1152.51 | 6.46     | 1152.51 | 6.46     | 1152.51 | 6.46     |
| 6.466678 | 1152.51 | 6.466678   | 1152.51 | 6.466678 | 1152.51 | 6.466678 | 1152.51 | 6.466678 |
| 6.47     | 1152.51 | 6.47       | 1152.51 | 6.47     | 1152.51 | 6.47     | 1152.51 | 6.47     |
| 6.476678 | 1152.51 | 6.476678   | 1152.51 | 6.476678 | 1152.51 | 6.476678 | 1152.51 | 6.476678 |
| 6.48     | 1152.51 | 6.48       | 1152.51 | 6.48     | 1152.51 | 6.48     | 1152.51 | 6.48     |
| 6.486678 | 1152.51 | 6.486678   | 1152.51 | 6.486678 | 1152.51 | 6.486678 | 1152.51 | 6.486678 |
| 6.49     | 1152.51 | 6.49       | 1152.51 | 6.49     | 1152.51 | 6.49     | 1152.51 | 6.49     |
| 6.496678 | 1152.51 | 6.496678   | 1152.51 | 6.496678 | 1152.51 | 6.496678 | 1152.51 | 6.496678 |
| 6.5      | 1152.51 | 6.5        | 1152.51 | 6.5      | 1152.51 | 6.5      | 1152.51 | 6.5      |
| 6.506678 | 1152.51 | 6.506678   | 1152.51 | 6.506678 | 1152.51 | 6.506678 | 1152.51 | 6.506678 |
| 6.51     | 1152.51 | 6.51       | 1152.51 | 6.51     | 1152.51 | 6.51     | 1152.51 | 6.51     |
| 6.516678 | 1152.51 | 6.516678</ |         |          |         |          |         |          |

|          |         |          |         |          |         |          |         |          |
|----------|---------|----------|---------|----------|---------|----------|---------|----------|
| 6.56     | 1152.51 | 6.56     | 1152.51 | 6.56     | 1152.51 | 6.56     | 1152.51 | 6.56     |
| 6.566678 | 1152.51 | 6.566678 | 1152.51 | 6.566678 | 1152.51 | 6.566678 | 1152.51 | 6.566678 |
| 6.57     | 1152.51 | 6.57     | 1152.51 | 6.57     | 1152.51 | 6.57     | 1152.51 | 6.57     |
| 6.576678 | 1152.51 | 6.576678 | 1152.51 | 6.576678 | 1152.51 | 6.576678 | 1152.51 | 6.576678 |
| 6.58     | 1152.51 | 6.58     | 1152.51 | 6.58     | 1152.51 | 6.58     | 1152.51 | 6.58     |
| 6.586678 | 1152.51 | 6.586678 | 1152.51 | 6.586678 | 1152.51 | 6.586678 | 1152.51 | 6.586678 |
| 6.59     | 1152.51 | 6.59     | 1152.51 | 6.59     | 1152.51 | 6.59     | 1152.51 | 6.59     |
| 6.596678 | 1152.51 | 6.596678 | 1152.51 | 6.596678 | 1152.51 | 6.596678 | 1152.51 | 6.596678 |
| 6.6      | 1152.51 | 6.6      | 1152.51 | 6.6      | 1152.51 | 6.6      | 1152.51 | 6.6      |
| 6.606678 | 1152.51 | 6.606678 | 1152.51 | 6.606678 | 1152.51 | 6.606678 | 1152.51 | 6.606678 |
| 6.61     | 1152.51 | 6.61     | 1152.51 | 6.61     | 1152.51 | 6.61     | 1152.51 | 6.61     |
| 6.616678 | 1152.51 | 6.616678 | 1152.51 | 6.616678 | 1152.51 | 6.616678 | 1152.51 | 6.616678 |
| 6.62     | 1152.51 | 6.62     | 1152.51 | 6.62     | 1152.51 | 6.62     | 1152.51 | 6.62     |
| 6.626678 | 1152.51 | 6.626678 | 1152.51 | 6.626678 | 1152.51 | 6.626678 | 1152.51 | 6.626678 |
| 6.63     | 1152.51 | 6.63     | 1152.51 | 6.63     | 1152.51 | 6.63     | 1152.51 | 6.63     |
| 6.636678 | 1152.51 | 6.636678 | 1152.51 | 6.636678 | 1152.51 | 6.636678 | 1152.51 | 6.636678 |
| 6.64     | 1152.51 | 6.64     | 1152.51 | 6.64     | 1152.51 | 6.64     | 1152.51 | 6.64     |
| 6.646678 | 1152.51 | 6.646678 | 1152.51 | 6.646678 | 1152.51 | 6.646678 | 1152.51 | 6.646678 |
| 6.65     | 1152.51 | 6.65     | 1152.51 | 6.65     | 1152.51 | 6.65     | 1152.51 | 6.65     |
| 6.656678 | 1152.51 | 6.656678 | 1152.51 | 6.656678 | 1152.51 | 6.656678 | 1152.51 | 6.656678 |
| 6.66     | 1152.51 | 6.66     | 1152.51 | 6.66     | 1152.51 | 6.66     | 1152.51 | 6.66     |
| 6.666678 | 1152.51 | 6.666678 | 1152.51 | 6.666678 | 1152.51 | 6.666678 | 1152.51 | 6.666678 |
| 6.67     | 1152.51 | 6.67     | 1152.51 | 6.67     | 1152.51 | 6.67     | 1152.51 | 6.67     |
| 6.676678 | 1152.51 | 6.676678 | 1152.51 | 6.676678 | 1152.51 | 6.676678 | 1152.51 | 6.676678 |
| 6.68     | 1152.51 | 6.68     | 1152.51 | 6.68     | 1152.51 | 6.68     | 1152.51 | 6.68     |
| 6.686678 | 1152.51 | 6.686678 | 1152.51 | 6.686678 | 1152.51 | 6.686678 | 1152.51 | 6.686678 |
| 6.69     | 1152.51 | 6.69     | 1152.51 | 6.69     | 1152.51 | 6.69     | 1152.51 | 6.69     |
| 6.696678 | 1152.51 | 6.696678 | 1152.51 | 6.696678 | 1152.51 | 6.696678 | 1152.51 | 6.696678 |
| 6.7      | 1152.51 | 6.7      | 1152.51 | 6.7      | 1152.51 | 6.7      | 1152.51 | 6.7      |
| 6.706678 | 1152.51 | 6.706678 | 1152.51 | 6.706678 | 1152.51 | 6.706678 | 1152.51 | 6.706678 |
| 6.71     | 1152.51 | 6.71     | 1152.51 | 6.71     | 1152.51 | 6.71     | 1152.51 | 6.71     |
| 6.716678 | 1152.51 | 6.716678 | 1152.51 | 6.716678 | 1152.51 | 6.716678 | 1152.51 | 6.716678 |
| 6.72     | 1152.51 | 6.72     | 1152.51 | 6.72     | 1152.51 | 6.72     | 1152.51 | 6.72     |
| 6.726678 | 1152.51 | 6.726678 | 1152.51 | 6.726678 | 1152.51 | 6.726678 | 1152.51 | 6.726678 |
| 6.73     | 1152.51 | 6.73     | 1152.51 | 6.73     | 1152.51 | 6.73     | 1152.51 | 6.73     |
| 6.736678 | 1152.51 | 6.736678 | 1152.51 | 6.736678 | 1152.51 | 6.736678 | 1152.51 | 6.736678 |
| 6.74     | 1152.51 | 6.74     | 1152.51 | 6.74     | 1152.51 | 6.74     | 1152.51 | 6.74     |
| 6.746678 | 1152.51 | 6.746678 | 1152.51 | 6.746678 | 1152.51 | 6.746678 | 1152.51 | 6.746678 |
| 6.75     | 1152.51 | 6.75     | 1152.51 | 6.75     | 1152.51 | 6.75     | 1152.51 | 6.75     |
| 6.756678 | 1152.51 | 6.756678 | 1152.51 | 6.756678 | 1152.51 | 6.756678 | 1152.51 | 6.756678 |
| 6.76     | 1152.51 | 6.76     | 1152.51 | 6.76     | 1152.51 | 6.76     | 1152.51 | 6.76     |
| 6.766678 | 1152.51 | 6.766678 | 1152.51 | 6.766678 | 1152.51 | 6.766678 | 1152.51 | 6.766678 |
| 6.77     | 1152.51 | 6.77     | 1152.51 | 6.77     | 1152.51 | 6.77     | 1152.51 | 6.77     |
| 6.776678 | 1152.51 | 6.776678 | 1152.51 | 6.776678 | 1152.51 | 6.776678 | 1152.51 | 6.776678 |
| 6.78     | 1152.51 | 6.78     | 1152.51 | 6.78     | 1152.51 | 6.78     | 1152.51 | 6.78     |
| 6.786678 | 1152.51 | 6.786678 | 1152.51 | 6.786678 | 1152.51 | 6.786678 | 1152.51 | 6.786678 |
| 6.79     | 1152.51 | 6.79     | 1152.51 | 6.79     | 1152.51 | 6.79     | 1152.51 | 6.79     |

|          |         |          |         |          |         |          |         |          |
|----------|---------|----------|---------|----------|---------|----------|---------|----------|
| 6.796678 | 1152.51 | 6.796678 | 1152.51 | 6.796678 | 1152.51 | 6.796678 | 1152.51 | 6.796678 |
| 6.8      | 1152.51 | 6.8      | 1152.51 | 6.8      | 1152.51 | 6.8      | 1152.51 | 6.8      |
| 6.806678 | 1152.51 | 6.806678 | 1152.51 | 6.806678 | 1152.51 | 6.806678 | 1152.51 | 6.806678 |
| 6.81     | 1152.51 | 6.81     | 1152.51 | 6.81     | 1152.51 | 6.81     | 1152.51 | 6.81     |
| 6.816678 | 1152.51 | 6.816678 | 1152.51 | 6.816678 | 1152.51 | 6.816678 | 1152.51 | 6.816678 |
| 6.82     | 1152.51 | 6.82     | 1152.51 | 6.82     | 1152.51 | 6.82     | 1152.51 | 6.82     |
| 6.826678 | 1152.51 | 6.826678 | 1152.51 | 6.826678 | 1152.51 | 6.826678 | 1152.51 | 6.826678 |
| 6.83     | 1152.51 | 6.83     | 1152.51 | 6.83     | 1152.51 | 6.83     | 1152.51 | 6.83     |
| 6.836678 | 1152.51 | 6.836678 | 1152.51 | 6.836678 | 1152.51 | 6.836678 | 1152.51 | 6.836678 |
| 6.84     | 1152.51 | 6.84     | 1152.51 | 6.84     | 1152.51 | 6.84     | 1152.51 | 6.84     |
| 6.846678 | 1152.51 | 6.846678 | 1152.51 | 6.846678 | 1152.51 | 6.846678 | 1152.51 | 6.846678 |
| 6.85     | 1152.51 | 6.85     | 1152.51 | 6.85     | 1152.51 | 6.85     | 1152.51 | 6.85     |
| 6.856678 | 1152.51 | 6.856678 | 1152.51 | 6.856678 | 1152.51 | 6.856678 | 1152.51 | 6.856678 |
| 6.86     | 1152.51 | 6.86     | 1152.51 | 6.86     | 1152.51 | 6.86     | 1152.51 | 6.86     |
| 6.866678 | 1152.51 | 6.866678 | 1152.51 | 6.866678 | 1152.51 | 6.866678 | 1152.51 | 6.866678 |
| 6.87     | 1152.51 | 6.87     | 1152.51 | 6.87     | 1152.51 | 6.87     | 1152.51 | 6.87     |
| 6.876678 | 1152.51 | 6.876678 | 1152.51 | 6.876678 | 1152.51 | 6.876678 | 1152.51 | 6.876678 |
| 6.88     | 1152.51 | 6.88     | 1152.51 | 6.88     | 1152.51 | 6.88     | 1152.51 | 6.88     |
| 6.886678 | 1152.51 | 6.886678 | 1152.51 | 6.886678 | 1152.51 | 6.886678 | 1152.51 | 6.886678 |
| 6.89     | 1152.51 | 6.89     | 1152.51 | 6.89     | 1152.51 | 6.89     | 1152.51 | 6.89     |
| 6.896678 | 1152.51 | 6.896678 | 1152.51 | 6.896678 | 1152.51 | 6.896678 | 1152.51 | 6.896678 |
| 6.9      | 1152.51 | 6.9      | 1152.51 | 6.9      | 1152.51 | 6.9      | 1152.51 | 6.9      |
| 6.906678 | 1152.51 | 6.906678 | 1152.51 | 6.906678 | 1152.51 | 6.906678 | 1152.51 | 6.906678 |
| 6.91     | 1152.51 | 6.91     | 1152.51 | 6.91     | 1152.51 | 6.91     | 1152.51 | 6.91     |
| 6.916678 | 1152.51 | 6.916678 | 1152.51 | 6.916678 | 1152.51 | 6.916678 | 1152.51 | 6.916678 |
| 6.92     | 1152.51 | 6.92     | 1152.51 | 6.92     | 1152.51 | 6.92     | 1152.51 | 6.92     |
| 6.926678 | 1152.51 | 6.926678 | 1152.51 | 6.926678 | 1152.51 | 6.926678 | 1152.51 | 6.926678 |
| 6.93     | 1152.51 | 6.93     | 1152.51 | 6.93     | 1152.51 | 6.93     | 1152.51 | 6.93     |
| 6.936678 | 1152.51 | 6.936678 | 1152.51 | 6.936678 | 1152.51 | 6.936678 | 1152.51 | 6.936678 |
| 6.94     | 1152.51 | 6.94     | 1152.51 | 6.94     | 1152.51 | 6.94     | 1152.51 | 6.94     |
| 6.946678 | 1152.51 | 6.946678 | 1152.51 | 6.946678 | 1152.51 | 6.946678 | 1152.51 | 6.946678 |
| 6.95     | 1152.51 | 6.95     | 1152.51 | 6.95     | 1152.51 | 6.95     | 1152.51 | 6.95     |
| 6.956678 | 1152.51 | 6.956678 | 1152.51 | 6.956678 | 1152.51 | 6.956678 | 1152.51 | 6.956678 |
| 6.96     | 1152.51 | 6.96     | 1152.51 | 6.96     | 1152.51 | 6.96     | 1152.51 | 6.96     |
| 6.966678 | 1152.51 | 6.966678 | 1152.51 | 6.966678 | 1152.51 | 6.966678 | 1152.51 | 6.966678 |
| 6.97     | 1152.51 | 6.97     | 1152.51 | 6.97     | 1152.51 | 6.97     | 1152.51 | 6.97     |
| 6.976678 | 1152.51 | 6.976678 | 1152.51 | 6.976678 | 1152.51 | 6.976678 | 1152.51 | 6.976678 |
| 6.98     | 1152.51 | 6.98     | 1152.51 | 6.98     | 1152.51 | 6.98     | 1152.51 | 6.98     |
| 6.986678 | 1152.51 | 6.986678 | 1152.51 | 6.986678 | 1152.51 | 6.986678 | 1152.51 | 6.986678 |
| 6.99     | 1152.51 | 6.99     | 1152.51 | 6.99     | 1152.51 | 6.99     | 1152.51 | 6.99     |
| 6.996678 | 1152.51 | 6.996678 | 1152.51 | 6.996678 | 1152.51 | 6.996678 | 1152.51 | 6.996678 |
| 7        | 1152.51 | 7        | 1152.51 | 7        | 1152.51 | 7        | 1152.51 | 7        |
| 7.006678 | 1152.51 | 7.006678 | 1152.51 | 7.006678 | 1152.51 | 7.006678 | 1152.51 | 7.006678 |
| 7.01     | 1152.51 | 7.01     | 1152.51 | 7.01     | 1152.51 | 7.01     | 1152.51 | 7.01     |
| 7.016678 | 1152.51 | 7.016678 | 1152.51 | 7.016678 | 1152.51 | 7.016678 | 1152.51 | 7.016678 |
| 7.02     | 1152.51 | 7.02     | 1152.51 | 7.02     | 1152.51 | 7.02     | 1152.51 | 7.02     |
| 7.026678 | 1152.51 | 7.026678 | 1152.51 | 7.026678 | 1152.51 | 7.026678 | 1152.51 | 7.026678 |

|          |         |          |         |          |         |          |         |          |
|----------|---------|----------|---------|----------|---------|----------|---------|----------|
| 7.03     | 1152.51 | 7.03     | 1152.51 | 7.03     | 1152.51 | 7.03     | 1152.51 | 7.03     |
| 7.036678 | 1152.51 | 7.036678 | 1152.51 | 7.036678 | 1152.51 | 7.036678 | 1152.51 | 7.036678 |
| 7.04     | 1152.51 | 7.04     | 1152.51 | 7.04     | 1152.51 | 7.04     | 1152.51 | 7.04     |
| 7.046678 | 1152.51 | 7.046678 | 1152.51 | 7.046678 | 1152.51 | 7.046678 | 1152.51 | 7.046678 |
| 7.05     | 1152.51 | 7.05     | 1152.51 | 7.05     | 1152.51 | 7.05     | 1152.51 | 7.05     |
| 7.056678 | 1152.51 | 7.056678 | 1152.51 | 7.056678 | 1152.51 | 7.056678 | 1152.51 | 7.056678 |
| 7.06     | 1152.51 | 7.06     | 1152.51 | 7.06     | 1152.51 | 7.06     | 1152.51 | 7.06     |
| 7.066678 | 1152.51 | 7.066678 | 1152.51 | 7.066678 | 1152.51 | 7.066678 | 1152.51 | 7.066678 |
| 7.07     | 1152.51 | 7.07     | 1152.51 | 7.07     | 1152.51 | 7.07     | 1152.51 | 7.07     |
| 7.076678 | 1152.51 | 7.076678 | 1152.51 | 7.076678 | 1152.51 | 7.076678 | 1152.51 | 7.076678 |
| 7.08     | 1152.51 | 7.08     | 1152.51 | 7.08     | 1152.51 | 7.08     | 1152.51 | 7.08     |
| 7.086678 | 1152.51 | 7.086678 | 1152.51 | 7.086678 | 1152.51 | 7.086678 | 1152.51 | 7.086678 |
| 7.09     | 1152.51 | 7.09     | 1152.51 | 7.09     | 1152.51 | 7.09     | 1152.51 | 7.09     |
| 7.096678 | 1152.51 | 7.096678 | 1152.51 | 7.096678 | 1152.51 | 7.096678 | 1152.51 | 7.096678 |
| 7.1      | 1152.51 | 7.1      | 1152.51 | 7.1      | 1152.51 | 7.1      | 1152.51 | 7.1      |
| 7.106678 | 1152.51 | 7.106678 | 1152.51 | 7.106678 | 1152.51 | 7.106678 | 1152.51 | 7.106678 |
| 7.11     | 1152.51 | 7.11     | 1152.51 | 7.11     | 1152.51 | 7.11     | 1152.51 | 7.11     |
| 7.116678 | 1152.51 | 7.116678 | 1152.51 | 7.116678 | 1152.51 | 7.116678 | 1152.51 | 7.116678 |
| 7.12     | 1152.51 | 7.12     | 1152.51 | 7.12     | 1152.51 | 7.12     | 1152.51 | 7.12     |
| 7.126678 | 1152.51 | 7.126678 | 1152.51 | 7.126678 | 1152.51 | 7.126678 | 1152.51 | 7.126678 |
| 7.13     | 1152.51 | 7.13     | 1152.51 | 7.13     | 1152.51 | 7.13     | 1152.51 | 7.13     |
| 7.136678 | 1152.51 | 7.136678 | 1152.51 | 7.136678 | 1152.51 | 7.136678 | 1152.51 | 7.136678 |
| 7.14     | 1152.51 | 7.14     | 1152.51 | 7.14     | 1152.51 | 7.14     | 1152.51 | 7.14     |
| 7.146678 | 1152.51 | 7.146678 | 1152.51 | 7.146678 | 1152.51 | 7.146678 | 1152.51 | 7.146678 |
| 7.15     | 1152.51 | 7.15     | 1152.51 | 7.15     | 1152.51 | 7.15     | 1152.51 | 7.15     |
| 7.156678 | 1152.51 | 7.156678 | 1152.51 | 7.156678 | 1152.51 | 7.156678 | 1152.51 | 7.156678 |
| 7.16     | 1152.51 | 7.16     | 1152.51 | 7.16     | 1152.51 | 7.16     | 1152.51 | 7.16     |
| 7.166678 | 1152.51 | 7.166678 | 1152.51 | 7.166678 | 1152.51 | 7.166678 | 1152.51 | 7.166678 |
| 7.17     | 1152.51 | 7.17     | 1152.51 | 7.17     | 1152.51 | 7.17     | 1152.51 | 7.17     |
| 7.176678 | 1152.51 | 7.176678 | 1152.51 | 7.176678 | 1152.51 | 7.176678 | 1152.51 | 7.176678 |
| 7.18     | 1152.51 | 7.18     | 1152.51 | 7.18     | 1152.51 | 7.18     | 1152.51 | 7.18     |
| 7.186678 | 1152.51 | 7.186678 | 1152.51 | 7.186678 | 1152.51 | 7.186678 | 1152.51 | 7.186678 |
| 7.19     | 1152.51 | 7.19     | 1152.51 | 7.19     | 1152.51 | 7.19     | 1152.51 | 7.19     |
| 7.196678 | 1152.51 | 7.196678 | 1152.51 | 7.196678 | 1152.51 | 7.196678 | 1152.51 | 7.196678 |
| 7.2      | 1152.51 | 7.2      | 1152.51 | 7.2      | 1152.51 | 7.2      | 1152.51 | 7.2      |
| 7.206678 | 1152.51 | 7.206678 | 1152.51 | 7.206678 | 1152.51 | 7.206678 | 1152.51 | 7.206678 |
| 7.21     | 1152.51 | 7.21     | 1152.51 | 7.21     | 1152.51 | 7.21     | 1152.51 | 7.21     |
| 7.216678 | 1152.51 | 7.216678 | 1152.51 | 7.216678 | 1152.51 | 7.216678 | 1152.51 | 7.216678 |
| 7.22     | 1152.51 | 7.22     | 1152    |          |         |          |         |          |

|          |         |            |         |          |         |          |         |          |
|----------|---------|------------|---------|----------|---------|----------|---------|----------|
| 7.266678 | 1152.51 | 7.266678   | 1152.51 | 7.266678 | 1152.51 | 7.266678 | 1152.51 | 7.266678 |
| 7.27     | 1152.51 | 7.27       | 1152.51 | 7.27     | 1152.51 | 7.27     | 1152.51 | 7.27     |
| 7.276678 | 1152.51 | 7.276678   | 1152.51 | 7.276678 | 1152.51 | 7.276678 | 1152.51 | 7.276678 |
| 7.28     | 1152.51 | 7.28       | 1152.51 | 7.28     | 1152.51 | 7.28     | 1152.51 | 7.28     |
| 7.286678 | 1152.51 | 7.286678   | 1152.51 | 7.286678 | 1152.51 | 7.286678 | 1152.51 | 7.286678 |
| 7.29     | 1152.51 | 7.29       | 1152.51 | 7.29     | 1152.51 | 7.29     | 1152.51 | 7.29     |
| 7.296678 | 1152.51 | 7.296678   | 1152.51 | 7.296678 | 1152.51 | 7.296678 | 1152.51 | 7.296678 |
| 7.3      | 1152.51 | 7.3        | 1152.51 | 7.3      | 1152.51 | 7.3      | 1152.51 | 7.3      |
| 7.306678 | 1152.51 | 7.306678   | 1152.51 | 7.306678 | 1152.51 | 7.306678 | 1152.51 | 7.306678 |
| 7.31     | 1152.51 | 7.31       | 1152.51 | 7.31     | 1152.51 | 7.31     | 1152.51 | 7.31     |
| 7.316678 | 1152.51 | 7.316678   | 1152.51 | 7.316678 | 1152.51 | 7.316678 | 1152.51 | 7.316678 |
| 7.32     | 1152.51 | 7.32       | 1152.51 | 7.32     | 1152.51 | 7.32     | 1152.51 | 7.32     |
| 7.326678 | 1152.51 | 7.326678   | 1152.51 | 7.326678 | 1152.51 | 7.326678 | 1152.51 | 7.326678 |
| 7.33     | 1152.51 | 7.33       | 1152.51 | 7.33     | 1152.51 | 7.33     | 1152.51 | 7.33     |
| 7.336678 | 1152.51 | 7.336678   | 1152.51 | 7.336678 | 1152.51 | 7.336678 | 1152.51 | 7.336678 |
| 7.34     | 1152.51 | 7.34       | 1152.51 | 7.34     | 1152.51 | 7.34     | 1152.51 | 7.34     |
| 7.346678 | 1152.51 | 7.346678   | 1152.51 | 7.346678 | 1152.51 | 7.346678 | 1152.51 | 7.346678 |
| 7.35     | 1152.51 | 7.35       | 1152.51 | 7.35     | 1152.51 | 7.35     | 1152.51 | 7.35     |
| 7.356678 | 1152.51 | 7.356678   | 1152.51 | 7.356678 | 1152.51 | 7.356678 | 1152.51 | 7.356678 |
| 7.36     | 1152.51 | 7.36       | 1152.51 | 7.36     | 1152.51 | 7.36     | 1152.51 | 7.36     |
| 7.366678 | 1152.51 | 7.366678   | 1152.51 | 7.366678 | 1152.51 | 7.366678 | 1152.51 | 7.366678 |
| 7.37     | 1152.51 | 7.37       | 1152.51 | 7.37     | 1152.51 | 7.37     | 1152.51 | 7.37     |
| 7.376678 | 1152.51 | 7.376678   | 1152.51 | 7.376678 | 1152.51 | 7.376678 | 1152.51 | 7.376678 |
| 7.38     | 1152.51 | 7.38       | 1152.51 | 7.38     | 1152.51 | 7.38     | 1152.51 | 7.38     |
| 7.386678 | 1152.51 | 7.386678   | 1152.51 | 7.386678 | 1152.51 | 7.386678 | 1152.51 | 7.386678 |
| 7.39     | 1152.51 | 7.39       | 1152.51 | 7.39     | 1152.51 | 7.39     | 1152.51 | 7.39     |
| 7.396678 | 1152.51 | 7.396678   | 1152.51 | 7.396678 | 1152.51 | 7.396678 | 1152.51 | 7.396678 |
| 7.4      | 1152.51 | 7.4        | 1152.51 | 7.4      | 1152.51 | 7.4      | 1152.51 | 7.4      |
| 7.406678 | 1152.51 | 7.406678   | 1152.51 | 7.406678 | 1152.51 | 7.406678 | 1152.51 | 7.406678 |
| 7.41     | 1152.51 | 7.41       | 1152.51 | 7.41     | 1152.51 | 7.41     | 1152.51 | 7.41     |
| 7.416678 | 1152.51 | 7.416678   | 1152.51 | 7.416678 | 1152.51 | 7.416678 | 1152.51 | 7.416678 |
| 7.42     | 1152.51 | 7.42       | 1152.51 | 7.42     | 1152.51 | 7.42     | 1152.51 | 7.42     |
| 7.426678 | 1152.51 | 7.426678   | 1152.51 | 7.426678 | 1152.51 | 7.426678 | 1152.51 | 7.426678 |
| 7.43     | 1152.51 | 7.43       | 1152.51 | 7.43     | 1152.51 | 7.43     | 1152.51 | 7.43     |
| 7.436678 | 1152.51 | 7.436678   | 1152.51 | 7.436678 | 1152.51 | 7.436678 | 1152.51 | 7.436678 |
| 7.44     | 1152.51 | 7.44       | 1152.51 | 7.44     | 1152.51 | 7.44     | 1152.51 | 7.44     |
| 7.446678 | 1152.51 | 7.446678   | 1152.51 | 7.446678 | 1152.51 | 7.446678 | 1152.51 | 7.446678 |
| 7.45     | 1152.51 | 7.45       | 1152.51 | 7.45     | 1152.51 | 7.45     | 1152.51 | 7.45     |
| 7.456678 | 1152.51 | 7.456678</ |         |          |         |          |         |          |



|          |         |          |         |          |         |          |         |          |
|----------|---------|----------|---------|----------|---------|----------|---------|----------|
| 7.5      | 1152.51 | 7.5      | 1152.51 | 7.5      | 1152.51 | 7.5      | 1152.51 | 7.5      |
| 7.506678 | 1152.51 | 7.506678 | 1152.51 | 7.506678 | 1152.51 | 7.506678 | 1152.51 | 7.506678 |
| 7.51     | 1152.51 | 7.51     | 1152.51 | 7.51     | 1152.51 | 7.51     | 1152.51 | 7.51     |
| 7.516678 | 1152.51 | 7.516678 | 1152.51 | 7.516678 | 1152.51 | 7.516678 | 1152.51 | 7.516678 |
| 7.52     | 1152.51 | 7.52     | 1152.51 | 7.52     | 1152.51 | 7.52     | 1152.51 | 7.52     |
| 7.526678 | 1152.51 | 7.526678 | 1152.51 | 7.526678 | 1152.51 | 7.526678 | 1152.51 | 7.526678 |
| 7.53     | 1152.51 | 7.53     | 1152.51 | 7.53     | 1152.51 | 7.53     | 1152.51 | 7.53     |
| 7.536678 | 1152.51 | 7.536678 | 1152.51 | 7.536678 | 1152.51 | 7.536678 | 1152.51 | 7.536678 |
| 7.54     | 1152.51 | 7.54     | 1152.51 | 7.54     | 1152.51 | 7.54     | 1152.51 | 7.54     |
| 7.546678 | 1152.51 | 7.546678 | 1152.51 | 7.546678 | 1152.51 | 7.546678 | 1152.51 | 7.546678 |
| 7.55     | 1152.51 | 7.55     | 1152.51 | 7.55     | 1152.51 | 7.55     | 1152.51 | 7.55     |
| 7.556678 | 1152.51 | 7.556678 | 1152.51 | 7.556678 | 1152.51 | 7.556678 | 1152.51 | 7.556678 |
| 7.56     | 1152.51 | 7.56     | 1152.51 | 7.56     | 1152.51 | 7.56     | 1152.51 | 7.56     |
| 7.566678 | 1152.51 | 7.566678 | 1152.51 | 7.566678 | 1152.51 | 7.566678 | 1152.51 | 7.566678 |
| 7.57     | 1152.51 | 7.57     | 1152.51 | 7.57     | 1152.51 | 7.57     | 1152.51 | 7.57     |
| 7.576678 | 1152.51 | 7.576678 | 1152.51 | 7.576678 | 1152.51 | 7.576678 | 1152.51 | 7.576678 |
| 7.58     | 1152.51 | 7.58     | 1152.51 | 7.58     | 1152.51 | 7.58     | 1152.51 | 7.58     |
| 7.586678 | 1152.51 | 7.586678 | 1152.51 | 7.586678 | 1152.51 | 7.586678 | 1152.51 | 7.586678 |
| 7.59     | 1152.51 | 7.59     | 1152.51 | 7.59     | 1152.51 | 7.59     | 1152.51 | 7.59     |
| 7.596678 | 1152.51 | 7.596678 | 1152.51 | 7.596678 | 1152.51 | 7.596678 | 1152.51 | 7.596678 |
| 7.6      | 1152.51 | 7.6      | 1152.51 | 7.6      | 1152.51 | 7.6      | 1152.51 | 7.6      |
| 7.606678 | 1152.51 | 7.606678 | 1152.51 | 7.606678 | 1152.51 | 7.606678 | 1152.51 | 7.606678 |
| 7.61     | 1152.51 | 7.61     | 1152.51 | 7.61     | 1152.51 | 7.61     | 1152.51 | 7.61     |
| 7.616678 | 1152.51 | 7.616678 | 1152.51 | 7.616678 | 1152.51 | 7.616678 | 1152.51 | 7.616678 |
| 7.62     | 1152.51 | 7.62     | 1152.51 | 7.62     | 1152.51 | 7.62     | 1152.51 | 7.62     |
| 7.626678 | 1152.51 | 7.626678 | 1152.51 | 7.626678 | 1152.51 | 7.626678 | 1152.51 | 7.626678 |
| 7.63     | 1152.51 | 7.63     | 1152.51 | 7.63     | 1152.51 | 7.63     | 1152.51 | 7.63     |
| 7.636678 | 1152.51 | 7.636678 | 1152.51 | 7.636678 | 1152.51 | 7.636678 | 1152.51 | 7.636678 |
| 7.64     | 1152.51 | 7.64     | 1152.51 | 7.64     | 1152.51 | 7.64     | 1152.51 | 7.64     |
| 7.646678 | 1152.51 | 7.646678 | 1152.51 | 7.646678 | 1152.51 | 7.646678 | 1152.51 | 7.646678 |
| 7.65     | 1152.51 | 7.65     | 1152.51 | 7.65     | 1152.51 | 7.65     | 1152.51 | 7.65     |
| 7.656678 | 1152.51 | 7.656678 | 1152.51 | 7.656678 | 1152.51 | 7.656678 | 1152.51 | 7.656678 |
| 7.66     | 1152.51 | 7.66     | 1152.51 | 7.66     | 1152.51 | 7.66     | 1152.51 | 7.66     |
| 7.666678 | 1152.51 | 7.666678 | 1152.51 | 7.666678 | 1152.51 | 7.666678 | 1152.51 | 7.666678 |
| 7.67     | 1152.51 | 7.67     | 1152.51 | 7.67     | 1152.51 | 7.67     | 1152.51 | 7.67     |
| 7.676678 | 1152.51 | 7.676678 | 1152.51 | 7.676678 | 1152.51 | 7.676678 | 1152.51 | 7.676678 |
| 7.68     | 1152.51 | 7.68     | 1152.51 | 7.68     | 1152.51 | 7.68     | 1152.51 | 7.68     |
| 7.686678 | 1152.51 | 7.686678 | 1152.51 | 7.686678 | 1152.51 | 7.686678 | 1152.51 | 7.686678 |
| 7.69     | 1152.51 | 7.69     | 1152.51 | 7.69     | 1152.51 | 7.69     | 1152.51 | 7.69     |
| 7.696678 | 1152.51 | 7.696678 | 1152.51 | 7.696678 | 1152.51 | 7.696678 | 1152.51 | 7.696678 |
| 7.7      | 1152.51 | 7.7      | 1152.51 | 7.7      | 1152.51 | 7.7      | 1152.51 | 7.7      |
| 7.706678 | 1152.51 | 7.706678 | 1152.51 | 7.706678 | 1152.51 | 7.706678 | 1152.51 | 7.706678 |
| 7.71     | 1152.51 | 7.71     | 1152.51 | 7.71     | 1152.51 | 7.71     | 1152.51 | 7.71     |
| 7.716678 | 1152.51 | 7.716678 | 1152.51 | 7.716678 | 1152.51 | 7.716678 | 1152.51 | 7.716678 |
| 7.72     | 1152.51 | 7.72     | 1152.51 | 7.72     | 1152.51 | 7.72     | 1152.51 | 7.72     |
| 7.726678 | 1152.51 | 7.726678 | 1152.51 | 7.726678 | 1152.51 | 7.726678 | 1152.51 | 7.726678 |
| 7.73     | 1152.51 | 7.73     | 1152.51 | 7.73     | 1152.51 | 7.73     | 1152.51 | 7.73     |

|          |         |            |         |          |         |          |         |          |
|----------|---------|------------|---------|----------|---------|----------|---------|----------|
| 7.736678 | 1152.51 | 7.736678   | 1152.51 | 7.736678 | 1152.51 | 7.736678 | 1152.51 | 7.736678 |
| 7.74     | 1152.51 | 7.74       | 1152.51 | 7.74     | 1152.51 | 7.74     | 1152.51 | 7.74     |
| 7.746678 | 1152.51 | 7.746678   | 1152.51 | 7.746678 | 1152.51 | 7.746678 | 1152.51 | 7.746678 |
| 7.75     | 1152.51 | 7.75       | 1152.51 | 7.75     | 1152.51 | 7.75     | 1152.51 | 7.75     |
| 7.756678 | 1152.51 | 7.756678   | 1152.51 | 7.756678 | 1152.51 | 7.756678 | 1152.51 | 7.756678 |
| 7.76     | 1152.51 | 7.76       | 1152.51 | 7.76     | 1152.51 | 7.76     | 1152.51 | 7.76     |
| 7.766678 | 1152.51 | 7.766678   | 1152.51 | 7.766678 | 1152.51 | 7.766678 | 1152.51 | 7.766678 |
| 7.77     | 1152.51 | 7.77       | 1152.51 | 7.77     | 1152.51 | 7.77     | 1152.51 | 7.77     |
| 7.776678 | 1152.51 | 7.776678   | 1152.51 | 7.776678 | 1152.51 | 7.776678 | 1152.51 | 7.776678 |
| 7.78     | 1152.51 | 7.78       | 1152.51 | 7.78     | 1152.51 | 7.78     | 1152.51 | 7.78     |
| 7.786678 | 1152.51 | 7.786678   | 1152.51 | 7.786678 | 1152.51 | 7.786678 | 1152.51 | 7.786678 |
| 7.79     | 1152.51 | 7.79       | 1152.51 | 7.79     | 1152.51 | 7.79     | 1152.51 | 7.79     |
| 7.796678 | 1152.51 | 7.796678   | 1152.51 | 7.796678 | 1152.51 | 7.796678 | 1152.51 | 7.796678 |
| 7.8      | 1152.51 | 7.8        | 1152.51 | 7.8      | 1152.51 | 7.8      | 1152.51 | 7.8      |
| 7.806678 | 1152.51 | 7.806678   | 1152.51 | 7.806678 | 1152.51 | 7.806678 | 1152.51 | 7.806678 |
| 7.81     | 1152.51 | 7.81       | 1152.51 | 7.81     | 1152.51 | 7.81     | 1152.51 | 7.81     |
| 7.816678 | 1152.51 | 7.816678   | 1152.51 | 7.816678 | 1152.51 | 7.816678 | 1152.51 | 7.816678 |
| 7.82     | 1152.51 | 7.82       | 1152.51 | 7.82     | 1152.51 | 7.82     | 1152.51 | 7.82     |
| 7.826678 | 1152.51 | 7.826678   | 1152.51 | 7.826678 | 1152.51 | 7.826678 | 1152.51 | 7.826678 |
| 7.83     | 1152.51 | 7.83       | 1152.51 | 7.83     | 1152.51 | 7.83     | 1152.51 | 7.83     |
| 7.836678 | 1152.51 | 7.836678   | 1152.51 | 7.836678 | 1152.51 | 7.836678 | 1152.51 | 7.836678 |
| 7.84     | 1152.51 | 7.84       | 1152.51 | 7.84     | 1152.51 | 7.84     | 1152.51 | 7.84     |
| 7.846678 | 1152.51 | 7.846678   | 1152.51 | 7.846678 | 1152.51 | 7.846678 | 1152.51 | 7.846678 |
| 7.85     | 1152.51 | 7.85       | 1152.51 | 7.85     | 1152.51 | 7.85     | 1152.51 | 7.85     |
| 7.856678 | 1152.51 | 7.856678   | 1152.51 | 7.856678 | 1152.51 | 7.856678 | 1152.51 | 7.856678 |
| 7.86     | 1152.51 | 7.86       | 1152.51 | 7.86     | 1152.51 | 7.86     | 1152.51 | 7.86     |
| 7.866678 | 1152.51 | 7.866678   | 1152.51 | 7.866678 | 1152.51 | 7.866678 | 1152.51 | 7.866678 |
| 7.87     | 1152.51 | 7.87       | 1152.51 | 7.87     | 1152.51 | 7.87     | 1152.51 | 7.87     |
| 7.876678 | 1152.51 | 7.876678   | 1152.51 | 7.876678 | 1152.51 | 7.876678 | 1152.51 | 7.876678 |
| 7.88     | 1152.51 | 7.88       | 1152.51 | 7.88     | 1152.51 | 7.88     | 1152.51 | 7.88     |
| 7.886678 | 1152.51 | 7.886678   | 1152.51 | 7.886678 | 1152.51 | 7.886678 | 1152.51 | 7.886678 |
| 7.89     | 1152.51 | 7.89       | 1152.51 | 7.89     | 1152.51 | 7.89     | 1152.51 | 7.89     |
| 7.896678 | 1152.51 | 7.896678   | 1152.51 | 7.896678 | 1152.51 | 7.896678 | 1152.51 | 7.896678 |
| 7.9      | 1152.51 | 7.9        | 1152.51 | 7.9      | 1152.51 | 7.9      | 1152.51 | 7.9      |
| 7.906678 | 1152.51 | 7.906678   | 1152.51 | 7.906678 | 1152.51 | 7.906678 | 1152.51 | 7.906678 |
| 7.91     | 1152.51 | 7.91       | 1152.51 | 7.91     | 1152.51 | 7.91     | 1152.51 | 7.91     |
| 7.916678 | 1152.51 | 7.916678   | 1152.51 | 7.916678 | 1152.51 | 7.916678 | 1152.51 | 7.916678 |
| 7.92     | 1152.51 | 7.92       | 1152.51 | 7.92     | 1152.51 | 7.92     | 1152.51 | 7.92     |
| 7.926678 | 1152.51 | 7.926678</ |         |          |         |          |         |          |

|          |         |          |         |          |         |          |         |          |
|----------|---------|----------|---------|----------|---------|----------|---------|----------|
| 7.97     | 1152.51 | 7.97     | 1152.51 | 7.97     | 1152.51 | 7.97     | 1152.51 | 7.97     |
| 7.976678 | 1152.51 | 7.976678 | 1152.51 | 7.976678 | 1152.51 | 7.976678 | 1152.51 | 7.976678 |
| 7.98     | 1152.51 | 7.98     | 1152.51 | 7.98     | 1152.51 | 7.98     | 1152.51 | 7.98     |
| 7.986678 | 1152.51 | 7.986678 | 1152.51 | 7.986678 | 1152.51 | 7.986678 | 1152.51 | 7.986678 |
| 7.99     | 1152.51 | 7.99     | 1152.51 | 7.99     | 1152.51 | 7.99     | 1152.51 | 7.99     |
| 7.996678 | 1152.51 | 7.996678 | 1152.51 | 7.996678 | 1152.51 | 7.996678 | 1152.51 | 7.996678 |
| 8        | 1152.51 | 8        | 1152.51 | 8        | 1152.51 | 8        | 1152.51 | 8        |
| 8.006678 | 1152.51 | 8.006678 | 1152.51 | 8.006678 | 1152.51 | 8.006678 | 1152.51 | 8.006678 |
| 8.01     | 1152.51 | 8.01     | 1152.51 | 8.01     | 1152.51 | 8.01     | 1152.51 | 8.01     |
| 8.016678 | 1152.51 | 8.016678 | 1152.51 | 8.016678 | 1152.51 | 8.016678 | 1152.51 | 8.016678 |
| 8.02     | 1152.51 | 8.02     | 1152.51 | 8.02     | 1152.51 | 8.02     | 1152.51 | 8.02     |
| 8.026678 | 1152.51 | 8.026678 | 1152.51 | 8.026678 | 1152.51 | 8.026678 | 1152.51 | 8.026678 |
| 8.03     | 1152.51 | 8.03     | 1152.51 | 8.03     | 1152.51 | 8.03     | 1152.51 | 8.03     |
| 8.036678 | 1152.51 | 8.036678 | 1152.51 | 8.036678 | 1152.51 | 8.036678 | 1152.51 | 8.036678 |
| 8.04     | 1152.51 | 8.04     | 1152.51 | 8.04     | 1152.51 | 8.04     | 1152.51 | 8.04     |
| 8.046678 | 1152.51 | 8.046678 | 1152.51 | 8.046678 | 1152.51 | 8.046678 | 1152.51 | 8.046678 |
| 8.05     | 1152.51 | 8.05     | 1152.51 | 8.05     | 1152.51 | 8.05     | 1152.51 | 8.05     |
| 8.056678 | 1152.51 | 8.056678 | 1152.51 | 8.056678 | 1152.51 | 8.056678 | 1152.51 | 8.056678 |
| 8.06     | 1152.51 | 8.06     | 1152.51 | 8.06     | 1152.51 | 8.06     | 1152.51 | 8.06     |
| 8.066678 | 1152.51 | 8.066678 | 1152.51 | 8.066678 | 1152.51 | 8.066678 | 1152.51 | 8.066678 |
| 8.07     | 1152.51 | 8.07     | 1152.51 | 8.07     | 1152.51 | 8.07     | 1152.51 | 8.07     |
| 8.076678 | 1152.51 | 8.076678 | 1152.51 | 8.076678 | 1152.51 | 8.076678 | 1152.51 | 8.076678 |
| 8.08     | 1152.51 | 8.08     | 1152.51 | 8.08     | 1152.51 | 8.08     | 1152.51 | 8.08     |
| 8.086678 | 1152.51 | 8.086678 | 1152.51 | 8.086678 | 1152.51 | 8.086678 | 1152.51 | 8.086678 |
| 8.09     | 1152.51 | 8.09     | 1152.51 | 8.09     | 1152.51 | 8.09     | 1152.51 | 8.09     |
| 8.096678 | 1152.51 | 8.096678 | 1152.51 | 8.096678 | 1152.51 | 8.096678 | 1152.51 | 8.096678 |
| 8.1      | 1152.51 | 8.1      | 1152.51 | 8.1      | 1152.51 | 8.1      | 1152.51 | 8.1      |
| 8.106678 | 1152.51 | 8.106678 | 1152.51 | 8.106678 | 1152.51 | 8.106678 | 1152.51 | 8.106678 |
| 8.11     | 1152.51 | 8.11     | 1152.51 | 8.11     | 1152.51 | 8.11     | 1152.51 | 8.11     |
| 8.116678 | 1152.51 | 8.116678 | 1152.51 | 8.116678 | 1152.51 | 8.116678 | 1152.51 | 8.116678 |
| 8.12     | 1152.51 | 8.12     | 1152.51 | 8.12     | 1152.51 | 8.12     | 1152.51 | 8.12     |
| 8.126678 | 1152.51 | 8.126678 | 1152.51 | 8.126678 | 1152.51 | 8.126678 | 1152.51 | 8.126678 |
| 8.13     | 1152.51 | 8.13     | 1152.51 | 8.13     | 1152.51 | 8.13     | 1152.51 | 8.13     |
| 8.136678 | 1152.51 | 8.136678 | 1152.51 | 8.136678 | 1152.51 | 8.136678 | 1152.51 | 8.136678 |
| 8.14     | 1152.51 | 8.14     | 1152.51 | 8.14     | 1152.51 | 8.14     | 1152.51 | 8.14     |
| 8.146678 | 1152.51 | 8.146678 | 1152.51 | 8.146678 | 1152.51 | 8.146678 | 1152.51 | 8.146678 |
| 8.15     | 1152.51 | 8.15     | 1152.51 | 8.15     | 1152.51 | 8.15     | 1152.51 | 8.15     |
| 8.156678 | 1152.51 | 8.156678 | 1152.51 | 8.156678 | 1152.51 | 8.156678 | 1152.51 | 8.156678 |
| 8.16     | 1152.51 | 8.16     | 1152.51 | 8.16     | 1152.51 | 8.16     | 1152.51 | 8.16     |
| 8.166678 | 1152.51 | 8.166678 | 1152.51 | 8.166678 | 1152.51 | 8.166678 | 1152.51 | 8.166678 |
| 8.17     | 1152.51 | 8.17     | 1152.51 | 8.17     | 1152.51 | 8.17     | 1152.51 | 8.17     |
| 8.176678 | 1152.51 | 8.176678 | 1152.51 | 8.176678 | 1152.51 | 8.176678 | 1152.51 | 8.176678 |
| 8.18     | 1152.51 | 8.18     | 1152.51 | 8.18     | 1152.51 | 8.18     | 1152.51 | 8.18     |
| 8.186678 | 1152.51 | 8.186678 | 1152.51 | 8.186678 | 1152.51 | 8.186678 | 1152.51 | 8.186678 |
| 8.19     | 1152.51 | 8.19     | 1152.51 | 8.19     | 1152.51 | 8.19     | 1152.51 | 8.19     |
| 8.196678 | 1152.51 | 8.196678 | 1152.51 | 8.196678 | 1152.51 | 8.196678 | 1152.51 | 8.196678 |
| 8.2      | 1152.51 | 8.2      | 1152.51 | 8.2      | 1152.51 | 8.2      | 1152.51 | 8.2      |

[illegible]

|          |         |          |         |          |         |          |         |          |
|----------|---------|----------|---------|----------|---------|----------|---------|----------|
| 8.44     | 1152.51 | 8.44     | 1152.51 | 8.44     | 1152.51 | 8.44     | 1152.51 | 8.44     |
| 8.446678 | 1152.51 | 8.446678 | 1152.51 | 8.446678 | 1152.51 | 8.446678 | 1152.51 | 8.446678 |
| 8.45     | 1152.51 | 8.45     | 1152.51 | 8.45     | 1152.51 | 8.45     | 1152.51 | 8.45     |
| 8.456678 | 1152.51 | 8.456678 | 1152.51 | 8.456678 | 1152.51 | 8.456678 | 1152.51 | 8.456678 |
| 8.46     | 1152.51 | 8.46     | 1152.51 | 8.46     | 1152.51 | 8.46     | 1152.51 | 8.46     |
| 8.466678 | 1152.51 | 8.466678 | 1152.51 | 8.466678 | 1152.51 | 8.466678 | 1152.51 | 8.466678 |
| 8.47     | 1152.51 | 8.47     | 1152.51 | 8.47     | 1152.51 | 8.47     | 1152.51 | 8.47     |
| 8.476678 | 1152.51 | 8.476678 | 1152.51 | 8.476678 | 1152.51 | 8.476678 | 1152.51 | 8.476678 |
| 8.48     | 1152.51 | 8.48     | 1152.51 | 8.48     | 1152.51 | 8.48     | 1152.51 | 8.48     |
| 8.486678 | 1152.51 | 8.486678 | 1152.51 | 8.486678 | 1152.51 | 8.486678 | 1152.51 | 8.486678 |
| 8.49     | 1152.51 | 8.49     | 1152.51 | 8.49     | 1152.51 | 8.49     | 1152.51 | 8.49     |
| 8.496678 | 1152.51 | 8.496678 | 1152.51 | 8.496678 | 1152.51 | 8.496678 | 1152.51 | 8.496678 |
| 8.5      | 1152.51 | 8.5      | 1152.51 | 8.5      | 1152.51 | 8.5      | 1152.51 | 8.5      |
| 8.506678 | 1152.51 | 8.506678 | 1152.51 | 8.506678 | 1152.51 | 8.506678 | 1152.51 | 8.506678 |
| 8.51     | 1152.51 | 8.51     | 1152.51 | 8.51     | 1152.51 | 8.51     | 1152.51 | 8.51     |
| 8.516678 | 1152.51 | 8.516678 | 1152.51 | 8.516678 | 1152.51 | 8.516678 | 1152.51 | 8.516678 |
| 8.52     | 1152.51 | 8.52     | 1152.51 | 8.52     | 1152.51 | 8.52     | 1152.51 | 8.52     |
| 8.526678 | 1152.51 | 8.526678 | 1152.51 | 8.526678 | 1152.51 | 8.526678 | 1152.51 | 8.526678 |
| 8.53     | 1152.51 | 8.53     | 1152.51 | 8.53     | 1152.51 | 8.53     | 1152.51 | 8.53     |
| 8.536678 | 1152.51 | 8.536678 | 1152.51 | 8.536678 | 1152.51 | 8.536678 | 1152.51 | 8.536678 |
| 8.54     | 1152.51 | 8.54     | 1152.51 | 8.54     | 1152.51 | 8.54     | 1152.51 | 8.54     |
| 8.546678 | 1152.51 | 8.546678 | 1152.51 | 8.546678 | 1152.51 | 8.546678 | 1152.51 | 8.546678 |
| 8.55     | 1152.51 | 8.55     | 1152.51 | 8.55     | 1152.51 | 8.55     | 1152.51 | 8.55     |
| 8.556678 | 1152.51 | 8.556678 | 1152.51 | 8.556678 | 1152.51 | 8.556678 | 1152.51 | 8.556678 |
| 8.56     | 1152.51 | 8.56     | 1152.51 | 8.56     | 1152.51 | 8.56     | 1152.51 | 8.56     |
| 8.566678 | 1152.51 | 8.566678 | 1152.51 | 8.566678 | 1152.51 | 8.566678 | 1152.51 | 8.566678 |
| 8.57     | 1152.51 | 8.57     | 1152.51 | 8.57     | 1152.51 | 8.57     | 1152.51 | 8.57     |
| 8.576678 | 1152.51 | 8.576678 | 1152.51 | 8.576678 | 1152.51 | 8.576678 | 1152.51 | 8.576678 |
| 8.58     | 1152.51 | 8.58     | 1152.51 | 8.58     | 1152.51 | 8.58     | 1152.51 | 8.58     |
| 8.586678 | 1152.51 | 8.586678 | 1152.51 | 8.586678 | 1152.51 | 8.586678 | 1152.51 | 8.586678 |
| 8.59     | 1152.51 | 8.59     | 1152.51 | 8.59     | 1152.51 | 8.59     | 1152.51 | 8.59     |
| 8.596678 | 1152.51 | 8.596678 | 1152.51 | 8.596678 | 1152.51 | 8.596678 | 1152.51 | 8.596678 |
| 8.6      | 1152.51 | 8.6      | 1152.51 | 8.6      | 1152.51 | 8.6      | 1152.51 | 8.6      |
| 8.606678 | 1152.51 | 8.606678 | 1152.51 | 8.606678 | 1152.51 | 8.606678 | 1152.51 | 8.606678 |
| 8.61     | 1152.51 | 8.61     | 1152.51 | 8.61     | 1152.51 | 8.61     | 1152.51 | 8.61     |
| 8.616678 | 1152.51 | 8.616678 | 1152.51 | 8.616678 | 1152.51 | 8.616678 | 1152.51 | 8.616678 |
| 8.62     | 1152.51 | 8.62     | 1152.51 | 8.62     | 1152.51 | 8.62     | 1152.51 | 8.62     |
| 8.626678 | 1152.51 | 8.626678 | 1152.51 | 8.626678 | 1152.51 | 8.626678 | 1152.51 | 8.626678 |
| 8.63     | 1152.51 | 8.63     | 1152    |          |         |          |         |          |

|          |         |            |         |          |         |          |         |          |
|----------|---------|------------|---------|----------|---------|----------|---------|----------|
| 8.676678 | 1152.51 | 8.676678   | 1152.51 | 8.676678 | 1152.51 | 8.676678 | 1152.51 | 8.676678 |
| 8.68     | 1152.51 | 8.68       | 1152.51 | 8.68     | 1152.51 | 8.68     | 1152.51 | 8.68     |
| 8.686678 | 1152.51 | 8.686678   | 1152.51 | 8.686678 | 1152.51 | 8.686678 | 1152.51 | 8.686678 |
| 8.69     | 1152.51 | 8.69       | 1152.51 | 8.69     | 1152.51 | 8.69     | 1152.51 | 8.69     |
| 8.696678 | 1152.51 | 8.696678   | 1152.51 | 8.696678 | 1152.51 | 8.696678 | 1152.51 | 8.696678 |
| 8.7      | 1152.51 | 8.7        | 1152.51 | 8.7      | 1152.51 | 8.7      | 1152.51 | 8.7      |
| 8.706678 | 1152.51 | 8.706678   | 1152.51 | 8.706678 | 1152.51 | 8.706678 | 1152.51 | 8.706678 |
| 8.71     | 1152.51 | 8.71       | 1152.51 | 8.71     | 1152.51 | 8.71     | 1152.51 | 8.71     |
| 8.716678 | 1152.51 | 8.716678   | 1152.51 | 8.716678 | 1152.51 | 8.716678 | 1152.51 | 8.716678 |
| 8.72     | 1152.51 | 8.72       | 1152.51 | 8.72     | 1152.51 | 8.72     | 1152.51 | 8.72     |
| 8.726678 | 1152.51 | 8.726678   | 1152.51 | 8.726678 | 1152.51 | 8.726678 | 1152.51 | 8.726678 |
| 8.73     | 1152.51 | 8.73       | 1152.51 | 8.73     | 1152.51 | 8.73     | 1152.51 | 8.73     |
| 8.736678 | 1152.51 | 8.736678   | 1152.51 | 8.736678 | 1152.51 | 8.736678 | 1152.51 | 8.736678 |
| 8.74     | 1152.51 | 8.74       | 1152.51 | 8.74     | 1152.51 | 8.74     | 1152.51 | 8.74     |
| 8.746678 | 1152.51 | 8.746678   | 1152.51 | 8.746678 | 1152.51 | 8.746678 | 1152.51 | 8.746678 |
| 8.75     | 1152.51 | 8.75       | 1152.51 | 8.75     | 1152.51 | 8.75     | 1152.51 | 8.75     |
| 8.756678 | 1152.51 | 8.756678   | 1152.51 | 8.756678 | 1152.51 | 8.756678 | 1152.51 | 8.756678 |
| 8.76     | 1152.51 | 8.76       | 1152.51 | 8.76     | 1152.51 | 8.76     | 1152.51 | 8.76     |
| 8.766678 | 1152.51 | 8.766678   | 1152.51 | 8.766678 | 1152.51 | 8.766678 | 1152.51 | 8.766678 |
| 8.77     | 1152.51 | 8.77       | 1152.51 | 8.77     | 1152.51 | 8.77     | 1152.51 | 8.77     |
| 8.776678 | 1152.51 | 8.776678   | 1152.51 | 8.776678 | 1152.51 | 8.776678 | 1152.51 | 8.776678 |
| 8.78     | 1152.51 | 8.78       | 1152.51 | 8.78     | 1152.51 | 8.78     | 1152.51 | 8.78     |
| 8.786678 | 1152.51 | 8.786678   | 1152.51 | 8.786678 | 1152.51 | 8.786678 | 1152.51 | 8.786678 |
| 8.79     | 1152.51 | 8.79       | 1152.51 | 8.79     | 1152.51 | 8.79     | 1152.51 | 8.79     |
| 8.796678 | 1152.51 | 8.796678   | 1152.51 | 8.796678 | 1152.51 | 8.796678 | 1152.51 | 8.796678 |
| 8.8      | 1152.51 | 8.8        | 1152.51 | 8.8      | 1152.51 | 8.8      | 1152.51 | 8.8      |
| 8.806678 | 1152.51 | 8.806678   | 1152.51 | 8.806678 | 1152.51 | 8.806678 | 1152.51 | 8.806678 |
| 8.81     | 1152.51 | 8.81       | 1152.51 | 8.81     | 1152.51 | 8.81     | 1152.51 | 8.81     |
| 8.816678 | 1152.51 | 8.816678   | 1152.51 | 8.816678 | 1152.51 | 8.816678 | 1152.51 | 8.816678 |
| 8.82     | 1152.51 | 8.82       | 1152.51 | 8.82     | 1152.51 | 8.82     | 1152.51 | 8.82     |
| 8.826678 | 1152.51 | 8.826678   | 1152.51 | 8.826678 | 1152.51 | 8.826678 | 1152.51 | 8.826678 |
| 8.83     | 1152.51 | 8.83       | 1152.51 | 8.83     | 1152.51 | 8.83     | 1152.51 | 8.83     |
| 8.836678 | 1152.51 | 8.836678   | 1152.51 | 8.836678 | 1152.51 | 8.836678 | 1152.51 | 8.836678 |
| 8.84     | 1152.51 | 8.84       | 1152.51 | 8.84     | 1152.51 | 8.84     | 1152.51 | 8.84     |
| 8.846678 | 1152.51 | 8.846678   | 1152.51 | 8.846678 | 1152.51 | 8.846678 | 1152.51 | 8.846678 |
| 8.85     | 1152.51 | 8.85       | 1152.51 | 8.85     | 1152.51 | 8.85     | 1152.51 | 8.85     |
| 8.856678 | 1152.51 | 8.856678   | 1152.51 | 8.856678 | 1152.51 | 8.856678 | 1152.51 | 8.856678 |
| 8.86     | 1152.51 | 8.86       | 1152.51 | 8.86     | 1152.51 | 8.86     | 1152.51 | 8.86     |
| 8.866678 | 1152.51 | 8.866678</ |         |          |         |          |         |          |

|          |          |          |         |          |         |          |          |          |
|----------|----------|----------|---------|----------|---------|----------|----------|----------|
| 8.91     | 1152.51  | 8.91     | 1152.51 | 8.91     | 1152.51 | 8.91     | 1152.51  | 8.91     |
| 8.916678 | 1152.51  | 8.916678 | 1152.51 | 8.916678 | 1152.51 | 8.916678 | 1152.51  | 8.916678 |
| 8.92     | 1152.51  | 8.92     | 1152.51 | 8.92     | 1152.51 | 8.92     | 1152.51  | 8.92     |
| 8.926678 | 1152.51  | 8.926678 | 1152.51 | 8.926678 | 1152.51 | 8.926678 | 1152.51  | 8.926678 |
| 8.93     | 1152.51  | 8.93     | 1152.51 | 8.93     | 1152.51 | 8.93     | 1152.51  | 8.93     |
| 8.936678 | 1152.51  | 8.936678 | 1152.51 | 8.936678 | 1152.51 | 8.936678 | 1152.51  | 8.936678 |
| 8.94     | 1152.51  | 8.94     | 1152.51 | 8.94     | 1152.51 | 8.94     | 1152.51  | 8.94     |
| 8.946678 | 1152.51  | 8.946678 | 1152.51 | 8.946678 | 1152.51 | 8.946678 | 1152.51  | 8.946678 |
| 8.95     | 1152.51  | 8.95     | 1152.51 | 8.95     | 1152.51 | 8.95     | 1152.51  | 8.95     |
| 8.956678 | 1152.51  | 8.956678 | 1152.51 | 8.956678 | 1152.51 | 8.956678 | 1152.51  | 8.956678 |
| 8.96     | 1152.51  | 8.96     | 1152.51 | 8.96     | 1152.51 | 8.96     | 1152.51  | 8.96     |
| 8.966678 | 1152.51  | 8.966678 | 1152.51 | 8.966678 | 1152.51 | 8.966678 | 1152.51  | 8.966678 |
| 8.97     | 1152.51  | 8.97     | 1152.51 | 8.97     | 1152.51 | 8.97     | 1152.51  | 8.97     |
| 8.976678 | 1152.51  | 8.976678 | 1152.51 | 8.976678 | 1152.51 | 8.976678 | 1152.51  | 8.976678 |
| 8.98     | 1152.51  | 8.98     | 1152.51 | 8.98     | 1152.51 | 8.98     | 1152.51  | 8.98     |
| 8.986678 | 1152.51  | 8.986678 | 1152.51 | 8.986678 | 1152.51 | 8.986678 | 1152.51  | 8.986678 |
| 8.99     | 1152.51  | 8.99     | 1152.51 | 8.99     | 1152.51 | 8.99     | 1152.51  | 8.99     |
| 8.996678 | 1152.51  | 8.996678 | 1152.51 | 8.996678 | 1152.51 | 8.996678 | 1152.51  | 8.996678 |
| 8.998131 | 1152.51  | 8.999732 | 1152.51 | 8.999732 | 1152.51 | 8.998131 | 1152.51  | 9        |
| 8.999221 | 1152.51  | 9.000827 | 1152.51 | 9.000827 | 1152.51 | 8.999221 | 1152.51  | 9.006678 |
| 9.000225 | 1152.51  | 9.00225  | 1152.51 | 9.00225  | 1152.51 | 9.000225 | 1152.51  | 9.01     |
| 9.001254 | 1152.51  | 9.003299 | 1152.51 | 9.003299 | 1152.51 | 9.001254 | 1152.51  | 9.016678 |
| 9.002341 | 1152.51  | 9.005134 | 1152.51 | 9.005134 | 1152.51 | 9.002341 | 1152.51  | 9.02     |
| 9.00361  | 1152.51  | 9.00674  | 1152.51 | 9.00674  | 1152.51 | 9.00361  | 1152.51  | 9.026678 |
| 9.004636 | 1152.51  | 9.008186 | 1152.51 | 9.008186 | 1152.51 | 9.004636 | 1152.51  | 9.03     |
| 9.005663 | 1152.51  | 9.009631 | 1152.51 | 9.009631 | 1152.51 | 9.005663 | 1152.51  | 9.036678 |
| 9.006689 | 1152.51  | 9.011242 | 1152.51 | 9.011242 | 1152.51 | 9.006689 | 1152.51  | 9.04     |
| 9.008317 | 1152.51  | 9.013132 | 1152.51 | 9.013132 | 1152.51 | 9.008317 | 1152.51  | 9.046678 |
| 9.009945 | 1152.51  | 9.014215 | 1152.51 | 9.014215 | 1152.51 | 9.009945 | 1152.51  | 9.05     |
| 9.011033 | 1152.51  | 9.015298 | 1152.51 | 9.015298 | 1152.51 | 9.011033 | 1152.51  | 9.056678 |
| 9.012884 | 1152.51  | 9.016381 | 1152.51 | 9.016381 | 1152.51 | 9.012884 | 1152.51  | 9.06     |
| 9.014736 | 1152.51  | 9.017464 | 1152.51 | 9.017464 | 1152.51 | 9.014736 | 1152.51  | 9.066678 |
| 9.016929 | 1152.51  | 9.02     | 1152.51 | 9.02     | 1152.51 | 9.016929 | 1152.51  | 9.07     |
| 9.019123 | 1152.51  | 9.021331 | 1152.51 | 9.021331 | 1152.51 | 9.019123 | 1152.51  | 9.076678 |
| 9.020313 | 1152.51  | 9.022559 | 1152.51 | 9.022559 | 1152.51 | 9.020313 | 1152.51  | 9.08     |
| 9.021573 | 1152.51  | 9.023992 | 1152.51 | 9.023992 | 1152.51 | 9.021573 | 1152.51  | 9.086678 |
| 9.022808 | 1152.51  | 9.025246 | 1152.51 | 9.025246 | 1152.51 | 9.022808 | 1152.51  | 9.09     |
| 9.023888 | 1152.51  | 9.026661 | 1152.51 | 9.026661 | 1152.51 | 9.023888 | 1152.51  | 9.096678 |
| 9.025779 | 1152.51  | 9.028077 | 1152.51 | 9.028077 | 1152.51 | 9.025779 | 1152.51  | 9.1      |
| 9.027316 | 1152.51  | 9.02908  | 1152.51 | 9.02908  | 1152.51 | 9.027316 | 1152.51  | 9.106678 |
| 9.028853 | 1152.51  | 9.030377 | 1152.51 | 9.030377 | 1152.51 | 9.028853 | 1152.51  | 9.11     |
| 9.029888 | 1152.51  | 9.031868 | 1152.51 | 9.031868 | 1152.51 | 9.029888 | 1152.51  | 9.116678 |
| 9.031001 | 1152.511 | 9.033608 | 1152.51 | 9.033608 | 1152.51 | 9.031001 | 1152.511 | 9.12     |
| 9.032363 | 1152.511 | 9.035027 | 1152.51 | 9.035027 | 1152.51 | 9.032363 | 1152.511 | 9.126678 |
| 9.033598 | 1152.51  | 9.036555 | 1152.51 | 9.036555 | 1152.51 | 9.033598 | 1152.51  | 9.13     |
| 9.035019 | 1152.509 | 9.038082 | 1152.51 | 9.038082 | 1152.51 | 9.035019 | 1152.509 | 9.136678 |
| 9.03644  | 1152.509 | 9.03961  | 1152.51 | 9.03961  | 1152.51 | 9.03644  | 1152.509 | 9.14     |

|          |          |          |         |          |         |          |          |          |
|----------|----------|----------|---------|----------|---------|----------|----------|----------|
| 9.037861 | 1152.51  | 9.041084 | 1152.51 | 9.041084 | 1152.51 | 9.037861 | 1152.51  | 9.146678 |
| 9.039282 | 1152.508 | 9.043012 | 1152.51 | 9.043012 | 1152.51 | 9.039282 | 1152.508 | 9.15     |
| 9.040722 | 1152.505 | 9.045662 | 1152.51 | 9.045662 | 1152.51 | 9.040722 | 1152.505 | 9.156678 |
| 9.04175  | 1152.504 | 9.047349 | 1152.51 | 9.047349 | 1152.51 | 9.04175  | 1152.504 | 9.16     |
| 9.042924 | 1152.504 | 9.049036 | 1152.51 | 9.049036 | 1152.51 | 9.042924 | 1152.504 | 9.166678 |
| 9.044098 | 1152.503 | 9.050241 | 1152.51 | 9.050241 | 1152.51 | 9.044098 | 1152.503 | 9.17     |
| 9.045713 | 1152.501 | 9.0517   | 1152.51 | 9.0517   | 1152.51 | 9.045713 | 1152.501 | 9.176678 |
| 9.04674  | 1152.499 | 9.053012 | 1152.51 | 9.053012 | 1152.51 | 9.04674  | 1152.499 | 9.18     |
| 9.047767 | 1152.498 | 9.054817 | 1152.51 | 9.054817 | 1152.51 | 9.047767 | 1152.498 | 9.186678 |
| 9.048795 | 1152.497 | 9.055966 | 1152.51 | 9.055966 | 1152.51 | 9.048795 | 1152.497 | 9.19     |
| 9.05     | 1152.496 | 9.057114 | 1152.51 | 9.057114 | 1152.51 | 9.05     | 1152.496 | 9.196678 |
| 9.051397 | 1152.494 | 9.059124 | 1152.51 | 9.059124 | 1152.51 | 9.051397 | 1152.494 | 9.2      |
| 9.052714 | 1152.492 | 9.060287 | 1152.51 | 9.060287 | 1152.51 | 9.052714 | 1152.492 | 9.206678 |
| 9.053867 | 1152.49  | 9.061663 | 1152.51 | 9.061663 | 1152.51 | 9.053867 | 1152.49  | 9.21     |
| 9.05502  | 1152.488 | 9.063011 | 1152.51 | 9.063011 | 1152.51 | 9.05502  | 1152.488 | 9.216678 |
| 9.056172 | 1152.487 | 9.06419  | 1152.51 | 9.06419  | 1152.51 | 9.056172 | 1152.487 | 9.22     |
| 9.05819  | 1152.484 | 9.066255 | 1152.51 | 9.066255 | 1152.51 | 9.05819  | 1152.484 | 9.226678 |
| 9.06     | 1152.481 | 9.068319 | 1152.51 | 9.068319 | 1152.51 | 9.06     | 1152.481 | 9.23     |
| 9.061279 | 1152.479 | 9.07     | 1152.51 | 9.07     | 1152.51 | 9.061279 | 1152.479 | 9.236678 |
| 9.062339 | 1152.478 | 9.071146 | 1152.51 | 9.071146 | 1152.51 | 9.062339 | 1152.478 | 9.24     |
| 9.064194 | 1152.475 | 9.072284 | 1152.51 | 9.072284 | 1152.51 | 9.064194 | 1152.475 | 9.246678 |
| 9.06626  | 1152.472 | 9.076314 | 1152.51 | 9.076314 | 1152.51 | 9.06626  | 1152.472 | 9.25     |
| 9.068325 | 1152.469 | 9.079001 | 1152.51 | 9.079001 | 1152.51 | 9.068325 | 1152.469 | 9.256678 |
| 9.07     | 1152.466 | 9.080384 | 1152.51 | 9.080384 | 1152.51 | 9.07     | 1152.466 | 9.26     |
| 9.071122 | 1152.464 | 9.083072 | 1152.51 | 9.083072 | 1152.51 | 9.071122 | 1152.464 | 9.266678 |
| 9.072312 | 1152.462 | 9.085759 | 1152.51 | 9.085759 | 1152.51 | 9.072312 | 1152.462 | 9.27     |
| 9.074562 | 1152.459 | 9.088178 | 1152.51 | 9.088178 | 1152.51 | 9.074562 | 1152.459 | 9.276678 |
| 9.08     | 1152.45  | 9.09     | 1152.51 | 9.09     | 1152.51 | 9.08     | 1152.45  | 9.28     |
| 9.082571 | 1152.446 | 9.092765 | 1152.51 | 9.092765 | 1152.51 | 9.082571 | 1152.446 | 9.286678 |
| 9.09     | 1152.434 | 9.094862 | 1152.51 | 9.094862 | 1152.51 | 9.09     | 1152.434 | 9.29     |
| 9.092571 | 1152.43  | 9.09696  | 1152.51 | 9.09696  | 1152.51 | 9.092571 | 1152.43  | 9.296678 |
| 9.1      | 1152.419 | 9.099058 | 1152.51 | 9.099058 | 1152.51 | 9.1      | 1152.419 | 9.3      |
| 9.102571 | 1152.415 | 9.1003   | 1152.51 | 9.1003   | 1152.51 | 9.102571 | 1152.415 | 9.306678 |
| 9.11     | 1152.403 | 9.102397 | 1152.51 | 9.102397 | 1152.51 | 9.11     | 1152.403 | 9.31     |
| 9.112571 | 1152.399 | 9.104378 | 1152.51 | 9.104378 | 1152.51 | 9.112571 | 1152.399 | 9.316678 |
| 9.12     | 1152.387 | 9.106358 | 1152.51 | 9.106358 | 1152.51 | 9.12     | 1152.387 | 9.32     |
| 9.122571 | 1152.383 | 9.108338 | 1152.51 | 9.108338 | 1152.51 | 9.122571 | 1152.383 | 9.326678 |
| 9.13     | 1152.371 | 9.11     | 1152.51 | 9.11     | 1152.51 | 9.13     | 1152.371 | 9.33     |
| 9.132571 | 1152.367 | 9.112263 | 1152.51 | 9.112263 | 1152.51 | 9.132571 | 1152.367 | 9.336678 |
| 9.14     | 1152.355 | 9.114134 | 1152.51 | 9.114134 | 1152.51 | 9.14     | 1152.355 | 9.34     |
| 9.142571 | 1152.351 | 9.116004 | 1152.51 | 9.116004 | 1152.51 | 9.142571 | 1152.351 | 9.346678 |
| 9.15     | 1152.339 | 9.117875 | 1152.51 | 9.117875 | 1152.51 | 9.15     | 1152.339 | 9.35     |
| 9.152571 | 1152.334 | 9.12     | 1152.51 | 9.12     | 1152.51 | 9.152571 | 1152.334 | 9.356678 |
| 9.16     | 1152.322 | 9.122138 | 1152.51 | 9.122138 | 1152.51 | 9.16     | 1152.322 | 9.36     |
| 9.162571 | 1152.318 | 9.1239   | 1152.51 | 9.1239   | 1152.51 | 9.162571 | 1152.318 | 9.366678 |
| 9.17     | 1152.306 | 9.125663 | 1152.51 | 9.125663 | 1152.51 | 9.17     | 1152.306 | 9.37     |
| 9.172571 | 1152.302 | 9.127425 | 1152.51 | 9.127425 | 1152.51 | 9.172571 | 1152.302 | 9.376678 |



|          |          |          |         |          |         |          |          |          |
|----------|----------|----------|---------|----------|---------|----------|----------|----------|
| 9.18     | 1152.29  | 9.13     | 1152.51 | 9.13     | 1152.51 | 9.18     | 1152.29  | 9.38     |
| 9.182571 | 1152.285 | 9.132014 | 1152.51 | 9.132014 | 1152.51 | 9.182571 | 1152.285 | 9.386678 |
| 9.19     | 1152.273 | 9.13367  | 1152.51 | 9.13367  | 1152.51 | 9.19     | 1152.273 | 9.39     |
| 9.192571 | 1152.269 | 9.135326 | 1152.51 | 9.135326 | 1152.51 | 9.192571 | 1152.269 | 9.396678 |
| 9.2      | 1152.257 | 9.136981 | 1152.51 | 9.136981 | 1152.51 | 9.2      | 1152.257 | 9.4      |
| 9.202571 | 1152.253 | 9.14     | 1152.51 | 9.14     | 1152.51 | 9.202571 | 1152.253 | 9.406678 |
| 9.21     | 1152.24  | 9.141892 | 1152.51 | 9.141892 | 1152.51 | 9.21     | 1152.24  | 9.41     |
| 9.212571 | 1152.236 | 9.143443 | 1152.51 | 9.143443 | 1152.51 | 9.212571 | 1152.236 | 9.416678 |
| 9.22     | 1152.224 | 9.144994 | 1152.51 | 9.144994 | 1152.51 | 9.22     | 1152.224 | 9.42     |
| 9.222571 | 1152.22  | 9.146545 | 1152.51 | 9.146545 | 1152.51 | 9.222571 | 1152.22  | 9.426678 |
| 9.23     | 1152.208 | 9.15     | 1152.51 | 9.15     | 1152.51 | 9.23     | 1152.208 | 9.43     |
| 9.232571 | 1152.203 | 9.151772 | 1152.51 | 9.151772 | 1152.51 | 9.232571 | 1152.203 | 9.436678 |
| 9.24     | 1152.191 | 9.15322  | 1152.51 | 9.15322  | 1152.51 | 9.24     | 1152.191 | 9.44     |
| 9.242571 | 1152.187 | 9.154668 | 1152.51 | 9.154668 | 1152.51 | 9.242571 | 1152.187 | 9.446678 |
| 9.25     | 1152.175 | 9.156116 | 1152.51 | 9.156116 | 1152.51 | 9.25     | 1152.175 | 9.45     |
| 9.252571 | 1152.17  | 9.16     | 1152.51 | 9.16     | 1152.51 | 9.252571 | 1152.17  | 9.456678 |
| 9.26     | 1152.158 | 9.161655 | 1152.51 | 9.161655 | 1152.51 | 9.26     | 1152.158 | 9.46     |
| 9.262571 | 1152.154 | 9.163002 | 1152.51 | 9.163002 | 1152.51 | 9.262571 | 1152.154 | 9.466678 |
| 9.27     | 1152.142 | 9.164349 | 1152.51 | 9.164349 | 1152.51 | 9.27     | 1152.142 | 9.47     |
| 9.272571 | 1152.137 | 9.165696 | 1152.51 | 9.165696 | 1152.51 | 9.272571 | 1152.137 | 9.476678 |
| 9.28     | 1152.125 | 9.17     | 1152.51 | 9.17     | 1152.51 | 9.28     | 1152.125 | 9.48     |
| 9.282571 | 1152.121 | 9.17154  | 1152.51 | 9.17154  | 1152.51 | 9.282571 | 1152.121 | 9.486678 |
| 9.29     | 1152.109 | 9.172789 | 1152.51 | 9.172789 | 1152.51 | 9.29     | 1152.109 | 9.49     |
| 9.292571 | 1152.104 | 9.174038 | 1152.51 | 9.174038 | 1152.51 | 9.292571 | 1152.104 | 9.496678 |
| 9.3      | 1152.092 | 9.175288 | 1152.51 | 9.175288 | 1152.51 | 9.3      | 1152.092 | 9.498131 |
| 9.302571 | 1152.088 | 9.179661 | 1152.51 | 9.179661 | 1152.51 | 9.302571 | 1152.088 | 9.499221 |
| 9.31     | 1152.076 | 9.18121  | 1152.51 | 9.18121  | 1152.51 | 9.31     | 1152.076 | 9.50024  |
| 9.312571 | 1152.071 | 9.182235 | 1152.51 | 9.182235 | 1152.51 | 9.312571 | 1152.071 | 9.501244 |
| 9.32     | 1152.059 | 9.18326  | 1152.51 | 9.18326  | 1152.51 | 9.32     | 1152.059 | 9.503287 |
| 9.322571 | 1152.055 | 9.185053 | 1152.51 | 9.185053 | 1152.51 | 9.322571 | 1152.055 | 9.505083 |
| 9.33     | 1152.043 | 9.186526 | 1152.51 | 9.186526 | 1152.51 | 9.33     | 1152.043 | 9.507348 |
| 9.332571 | 1152.038 | 9.187998 | 1152.51 | 9.187998 | 1152.51 | 9.332571 | 1152.038 | 9.508714 |
| 9.34     | 1152.026 | 9.189471 | 1152.51 | 9.189471 | 1152.51 | 9.34     | 1152.026 | 9.51     |
| 9.342571 | 1152.022 | 9.191683 | 1152.51 | 9.191683 | 1152.51 | 9.342571 | 1152.022 | 9.511097 |
| 9.35     | 1152.01  | 9.193155 | 1152.51 | 9.193155 | 1152.51 | 9.35     | 1152.01  | 9.512791 |
| 9.352571 | 1152.005 | 9.194377 | 1152.51 | 9.194377 | 1152.51 | 9.352571 | 1152.005 | 9.514706 |
| 9.36     | 1151.993 | 9.195599 | 1152.51 | 9.195599 | 1152.51 | 9.36     | 1151.993 | 9.516621 |
| 9.362571 | 1151.989 | 9.196821 | 1152.51 | 9.196821 | 1152.51 | 9.362571 | 1151.989 | 9.519136 |
| 9.37     | 1151.977 | 9.19961  | 1152.51 | 9.19961  | 1152.51 | 9.37     | 1151.977 | 9.520359 |
| 9.372571 | 1151.972 | 9.200854 | 1152.51 | 9.200854 | 1152.51 | 9.372571 | 1151.972 | 9.521541 |
| 9.38     | 1151.96  | 9.203046 | 1152.51 | 9.203046 | 1152.51 | 9.38     | 1151.96  | 9.5227   |
| 9.382571 | 1151.956 | 9.204302 | 1152.51 | 9.204302 | 1152.51 | 9.382571 | 1151.956 | 9.523713 |
| 9.39     | 1151.944 | 9.205558 | 1152.51 | 9.205558 | 1152.51 | 9.39     | 1151.944 | 9.524943 |
| 9.392571 | 1151.939 | 9.206813 | 1152.51 | 9.206813 | 1152.51 | 9.392571 | 1151.939 | 9.526173 |
| 9.4      | 1151.927 | 9.209011 | 1152.51 | 9.209011 | 1152.51 | 9.4      | 1151.927 | 9.527404 |
| 9.402571 | 1151.923 | 9.210314 | 1152.51 | 9.210314 | 1152.51 | 9.402571 | 1151.923 | 9.528634 |
| 9.41     | 1151.911 | 9.211413 | 1152.51 | 9.211413 | 1152.51 | 9.41     | 1151.911 | 9.529646 |

|          |          |          |         |          |         |          |          |          |
|----------|----------|----------|---------|----------|---------|----------|----------|----------|
| 9.412571 | 1151.906 | 9.212637 | 1152.51 | 9.212637 | 1152.51 | 9.412571 | 1151.906 | 9.530731 |
| 9.42     | 1151.894 | 9.213739 | 1152.51 | 9.213739 | 1152.51 | 9.42     | 1151.894 | 9.53193  |
| 9.422571 | 1151.89  | 9.21484  | 1152.51 | 9.21484  | 1152.51 | 9.422571 | 1151.89  | 9.53306  |
| 9.43     | 1151.878 | 9.215942 | 1152.51 | 9.215942 | 1152.51 | 9.43     | 1151.878 | 9.534095 |
| 9.432571 | 1151.873 | 9.21787  | 1152.51 | 9.21787  | 1152.51 | 9.432571 | 1151.873 | 9.535413 |
| 9.44     | 1151.861 | 9.219798 | 1152.51 | 9.219798 | 1152.51 | 9.44     | 1151.861 | 9.536731 |
| 9.442571 | 1151.857 | 9.221278 | 1152.51 | 9.221278 | 1152.51 | 9.442571 | 1151.857 | 9.538049 |
| 9.45     | 1151.845 | 9.222394 | 1152.51 | 9.222394 | 1152.51 | 9.45     | 1151.845 | 9.539778 |
| 9.452571 | 1151.84  | 9.223398 | 1152.51 | 9.223398 | 1152.51 | 9.452571 | 1151.84  | 9.541102 |
| 9.46     | 1151.828 | 9.224403 | 1152.51 | 9.224403 | 1152.51 | 9.46     | 1151.828 | 9.542132 |
| 9.462571 | 1151.824 | 9.225408 | 1152.51 | 9.225408 | 1152.51 | 9.462571 | 1151.824 | 9.54355  |
| 9.47     | 1151.811 | 9.227166 | 1152.51 | 9.227166 | 1152.51 | 9.47     | 1151.811 | 9.545353 |
| 9.472571 | 1151.807 | 9.228924 | 1152.51 | 9.228924 | 1152.51 | 9.472571 | 1151.807 | 9.547157 |
| 9.48     | 1151.795 | 9.23     | 1152.51 | 9.23     | 1152.51 | 9.48     | 1151.795 | 9.548961 |
| 9.482571 | 1151.791 | 9.23118  | 1152.51 | 9.23118  | 1152.51 | 9.482571 | 1151.791 | 9.55     |
| 9.49     | 1151.778 | 9.232214 | 1152.51 | 9.232214 | 1152.51 | 9.49     | 1151.778 | 9.55116  |
| 9.492571 | 1151.774 | 9.234076 | 1152.51 | 9.234076 | 1152.51 | 9.492571 | 1151.774 | 9.552627 |
| 9.5      | 1151.762 | 9.235111 | 1152.51 | 9.235111 | 1152.51 | 9.499732 | 1151.762 | 9.554338 |
| 9.502571 | 1151.758 | 9.24     | 1152.51 | 9.24     | 1152.51 | 9.500827 | 1151.761 | 9.556692 |
| 9.51     | 1151.745 | 9.241016 | 1152.51 | 9.241016 | 1152.51 | 9.50225  | 1151.758 | 9.558039 |
| 9.512571 | 1151.741 | 9.247236 | 1152.51 | 9.247236 | 1152.51 | 9.503299 | 1151.756 | 9.559387 |
| 9.52     | 1151.729 | 9.25     | 1152.51 | 9.25     | 1152.51 | 9.505134 | 1151.753 | 9.560668 |
| 9.522571 | 1151.725 | 9.257109 | 1152.51 | 9.257109 | 1152.51 | 9.50674  | 1151.751 | 9.561921 |
| 9.53     | 1151.712 | 9.26     | 1152.51 | 9.26     | 1152.51 | 9.508186 | 1151.748 | 9.563499 |
| 9.532571 | 1151.708 | 9.267109 | 1152.51 | 9.267109 | 1152.51 | 9.509631 | 1151.746 | 9.564972 |
| 9.54     | 1151.696 | 9.27     | 1152.51 | 9.27     | 1152.51 | 9.511242 | 1151.743 | 9.566261 |
| 9.542571 | 1151.692 | 9.277109 | 1152.51 | 9.277109 | 1152.51 | 9.513132 | 1151.74  | 9.568517 |
| 9.55     | 1151.679 | 9.28     | 1152.51 | 9.28     | 1152.51 | 9.514215 | 1151.738 | 9.57     |
| 9.552571 | 1151.675 | 9.287109 | 1152.51 | 9.287109 | 1152.51 | 9.515298 | 1151.737 | 9.571048 |
| 9.56     | 1151.663 | 9.29     | 1152.51 | 9.29     | 1152.51 | 9.516381 | 1151.735 | 9.572093 |
| 9.562571 | 1151.659 | 9.297109 | 1152.51 | 9.297109 | 1152.51 | 9.517464 | 1151.733 | 9.575596 |
| 9.57     | 1151.646 | 9.3      | 1152.51 | 9.3      | 1152.51 | 9.52     | 1151.729 | 9.578247 |
| 9.572571 | 1151.642 | 9.307109 | 1152.51 | 9.307109 | 1152.51 | 9.521331 | 1151.727 | 9.58     |
| 9.58     | 1151.63  | 9.31     | 1152.51 | 9.31     | 1152.51 | 9.522559 | 1151.725 | 9.58303  |
| 9.582571 | 1151.626 | 9.317109 | 1152.51 | 9.317109 | 1152.51 | 9.523992 | 1151.722 | 9.585243 |
| 9.59     | 1151.613 | 9.32     | 1152.51 | 9.32     | 1152.51 | 9.525246 | 1151.72  | 9.587456 |
| 9.592571 | 1151.609 | 9.327109 | 1152.51 | 9.327109 | 1152.51 | 9.526661 | 1151.718 | 9.589669 |
| 9.6      | 1151.597 | 9.33     | 1152.51 | 9.33     | 1152.51 | 9.528077 | 1151.716 | 9.592529 |
| 9.602571 | 1151.592 | 9.337109 | 1152.51 | 9.337109 | 1152.51 | 9.529077 | 1151.714 | 9.59462  |
| 9.61     | 1151.58  | 9.34     | 1152.51 | 9.34     | 1152.51 | 9.530372 | 1151.712 | 9.59671  |
| 9.612571 | 1151.576 | 9.347109 | 1152.51 | 9.347109 | 1152.51 | 9.531862 | 1151.709 | 9.598801 |
| 9.62     | 1151.564 | 9.35     | 1152.51 | 9.35     | 1152.51 | 9.5336   | 1151.706 | 9.6      |
| 9.622571 | 1151.559 | 9.357109 | 1152.51 | 9.357109 | 1152.51 | 9.535019 | 1151.704 | 9.602389 |
| 9.63     | 1151.547 | 9.36     | 1152.51 | 9.36     | 1152.51 | 9.536546 | 1151.702 | 9.604369 |
| 9.632571 | 1151.543 | 9.367109 | 1152.51 | 9.367109 | 1152.51 | 9.538074 | 1151.699 | 9.606349 |
| 9.64     | 1151.531 | 9.37     | 1152.51 | 9.37     | 1152.51 | 9.539601 | 1151.697 | 9.608328 |
| 9.642571 | 1151.526 | 9.377109 | 1152.51 | 9.377109 | 1152.51 | 9.541084 | 1151.694 | 9.61     |

|          |          |          |         |          |         |          |          |          |
|----------|----------|----------|---------|----------|---------|----------|----------|----------|
| 9.65     | 1151.514 | 9.38     | 1152.51 | 9.38     | 1152.51 | 9.543011 | 1151.691 | 9.612263 |
| 9.652571 | 1151.51  | 9.387109 | 1152.51 | 9.387109 | 1152.51 | 9.545662 | 1151.687 | 9.614133 |
| 9.66     | 1151.498 | 9.39     | 1152.51 | 9.39     | 1152.51 | 9.547349 | 1151.684 | 9.616003 |
| 9.662571 | 1151.493 | 9.397109 | 1152.51 | 9.397109 | 1152.51 | 9.549035 | 1151.681 | 9.617874 |
| 9.67     | 1151.481 | 9.4      | 1152.51 | 9.4      | 1152.51 | 9.550241 | 1151.679 | 9.62     |
| 9.672571 | 1151.477 | 9.407109 | 1152.51 | 9.407109 | 1152.51 | 9.5517   | 1151.677 | 9.622138 |
| 9.68     | 1151.465 | 9.41     | 1152.51 | 9.41     | 1152.51 | 9.553012 | 1151.674 | 9.6239   |
| 9.682571 | 1151.46  | 9.417109 | 1152.51 | 9.417109 | 1152.51 | 9.554817 | 1151.671 | 9.625662 |
| 9.69     | 1151.448 | 9.42     | 1152.51 | 9.42     | 1152.51 | 9.555966 | 1151.669 | 9.627424 |
| 9.692571 | 1151.444 | 9.427109 | 1152.51 | 9.427109 | 1152.51 | 9.557114 | 1151.668 | 9.63     |
| 9.7      | 1151.431 | 9.43     | 1152.51 | 9.43     | 1152.51 | 9.559124 | 1151.664 | 9.632014 |
| 9.702571 | 1151.427 | 9.437109 | 1152.51 | 9.437109 | 1152.51 | 9.560287 | 1151.662 | 9.63367  |
| 9.71     | 1151.415 | 9.44     | 1152.51 | 9.44     | 1152.51 | 9.561663 | 1151.66  | 9.635325 |
| 9.712571 | 1151.411 | 9.447109 | 1152.51 | 9.447109 | 1152.51 | 9.563011 | 1151.658 | 9.636981 |
| 9.72     | 1151.398 | 9.45     | 1152.51 | 9.45     | 1152.51 | 9.564191 | 1151.656 | 9.64     |
| 9.722571 | 1151.394 | 9.457109 | 1152.51 | 9.457109 | 1152.51 | 9.566255 | 1151.652 | 9.641892 |
| 9.73     | 1151.382 | 9.46     | 1152.51 | 9.46     | 1152.51 | 9.568319 | 1151.649 | 9.643443 |
| 9.732571 | 1151.378 | 9.467109 | 1152.51 | 9.467109 | 1152.51 | 9.57     | 1151.646 | 9.644993 |
| 9.74     | 1151.365 | 9.47     | 1152.51 | 9.47     | 1152.51 | 9.571146 | 1151.644 | 9.646544 |
| 9.742571 | 1151.361 | 9.477109 | 1152.51 | 9.477109 | 1152.51 | 9.572285 | 1151.643 | 9.65     |
| 9.75     | 1151.349 | 9.48     | 1152.51 | 9.48     | 1152.51 | 9.576312 | 1151.636 | 9.651772 |
| 9.752571 | 1151.345 | 9.487109 | 1152.51 | 9.487109 | 1152.51 | 9.578999 | 1151.631 | 9.65322  |
| 9.76     | 1151.332 | 9.49     | 1152.51 | 9.49     | 1152.51 | 9.58     | 1151.63  | 9.654667 |
| 9.762571 | 1151.328 | 9.497109 | 1152.51 | 9.497109 | 1152.51 | 9.583071 | 1151.625 | 9.656115 |
| 9.77     | 1151.316 | 9.498439 | 1152.51 | 9.5      | 1152.51 | 9.585757 | 1151.62  | 9.66     |
| 9.772571 | 1151.312 | 9.499654 | 1152.51 | 9.507109 | 1152.51 | 9.588175 | 1151.616 | 9.661654 |
| 9.78     | 1151.299 | 9.500669 | 1152.51 | 9.51     | 1152.51 | 9.59     | 1151.613 | 9.663001 |
| 9.782571 | 1151.295 | 9.501793 | 1152.51 | 9.517109 | 1152.51 | 9.592764 | 1151.609 | 9.664348 |
| 9.79     | 1151.283 | 9.503708 | 1152.51 | 9.52     | 1152.51 | 9.59486  | 1151.605 | 9.665695 |
| 9.792571 | 1151.278 | 9.504732 | 1152.51 | 9.527109 | 1152.51 | 9.596957 | 1151.602 | 9.67     |
| 9.8      | 1151.266 | 9.505755 | 1152.51 | 9.53     | 1152.51 | 9.599054 | 1151.598 | 9.671539 |
| 9.802571 | 1151.262 | 9.506778 | 1152.51 | 9.537109 | 1152.51 | 9.6003   | 1151.596 | 9.672789 |
| 9.81     | 1151.25  | 9.508415 | 1152.51 | 9.54     | 1152.51 | 9.602396 | 1151.593 | 9.674038 |
| 9.812571 | 1151.245 | 9.51     | 1152.51 | 9.547109 | 1152.51 | 9.604376 | 1151.589 | 9.675287 |
| 9.82     | 1151.233 | 9.511214 | 1152.51 | 9.55     | 1152.51 | 9.606355 | 1151.586 | 9.67966  |
| 9.822571 | 1151.229 | 9.513124 | 1152.51 | 9.557109 | 1152.51 | 9.608334 | 1151.583 | 9.68121  |
| 9.83     | 1151.217 | 9.514206 | 1152.51 | 9.56     | 1152.51 | 9.61     | 1151.58  | 9.682235 |
| 9.832571 | 1151.212 | 9.515288 | 1152.51 | 9.567109 | 1152.51 | 9.612262 | 1151.576 | 9.68326  |
| 9.84     | 1151.2   | 9.51637  | 1152.51 | 9.57     | 1152.51 | 9.614132 | 1151.573 | 9.685053 |
| 9.842571 | 1151.196 | 9.517453 | 1152.51 | 9.577109 | 1152.51 | 9.616001 | 1151.57  | 9.686525 |
| 9.85     | 1151.184 | 9.52     | 1152.51 | 9.58     | 1152.51 | 9.617871 | 1151.567 | 9.687997 |
| 9.852571 | 1151.179 | 9.52133  | 1152.51 | 9.587109 | 1152.51 | 9.62     | 1151.564 | 9.689469 |
| 9.86     | 1151.167 | 9.522558 | 1152.51 | 9.59     | 1152.51 | 9.622137 | 1151.56  | 9.691682 |
| 9.862571 | 1151.163 | 9.523991 | 1152.51 | 9.597109 | 1152.51 | 9.623898 | 1151.557 | 9.693155 |
| 9.87     | 1151.15  | 9.525245 | 1152.51 | 9.6      | 1152.51 | 9.62566  | 1151.554 | 9.694376 |
| 9.872571 | 1151.146 | 9.526659 | 1152.51 | 9.607109 | 1152.51 | 9.627421 | 1151.551 | 9.695597 |
| 9.88     | 1151.134 | 9.528074 | 1152.51 | 9.61     | 1152.51 | 9.63     | 1151.547 | 9.696819 |

|          |          |          |          |          |         |          |          |          |
|----------|----------|----------|----------|----------|---------|----------|----------|----------|
| 9.882571 | 1151.13  | 9.529075 | 1152.51  | 9.617109 | 1152.51 | 9.632013 | 1151.544 | 9.7      |
| 9.89     | 1151.117 | 9.530128 | 1152.51  | 9.62     | 1152.51 | 9.633668 | 1151.541 | 9.701396 |
| 9.892571 | 1151.113 | 9.53114  | 1152.511 | 9.627109 | 1152.51 | 9.635323 | 1151.538 | 9.702617 |
| 9.899732 | 1151.101 | 9.532164 | 1152.511 | 9.63     | 1152.51 | 9.636978 | 1151.536 | 9.703717 |
| 9.900827 | 1151.099 | 9.533299 | 1152.51  | 9.637109 | 1152.51 | 9.64     | 1151.531 | 9.704816 |
| 9.90225  | 1151.097 | 9.534426 | 1152.509 | 9.64     | 1152.51 | 9.641891 | 1151.527 | 9.705915 |
| 9.903299 | 1151.095 | 9.535862 | 1152.509 | 9.647109 | 1152.51 | 9.643441 | 1151.525 | 9.71     |
| 9.905134 | 1151.092 | 9.537297 | 1152.51  | 9.65     | 1152.51 | 9.644991 | 1151.522 | 9.711256 |
| 9.90674  | 1151.09  | 9.538732 | 1152.509 | 9.657109 | 1152.51 | 9.646541 | 1151.52  | 9.712356 |
| 9.908186 | 1151.087 | 9.54     | 1152.506 | 9.66     | 1152.51 | 9.65     | 1151.514 | 9.714334 |
| 9.909631 | 1151.085 | 9.541175 | 1152.505 | 9.667109 | 1152.51 | 9.651771 | 1151.511 | 9.718502 |
| 9.911242 | 1151.082 | 9.542366 | 1152.504 | 9.67     | 1152.51 | 9.653218 | 1151.509 | 9.72     |
| 9.913132 | 1151.079 | 9.543556 | 1152.503 | 9.677109 | 1152.51 | 9.654665 | 1151.506 | 9.721625 |
| 9.914215 | 1151.077 | 9.544747 | 1152.502 | 9.68     | 1152.51 | 9.656112 | 1151.504 | 9.723675 |
| 9.915298 | 1151.076 | 9.545788 | 1152.501 | 9.687109 | 1152.51 | 9.66     | 1151.498 | 9.724752 |
| 9.916381 | 1151.074 | 9.54683  | 1152.499 | 9.69     | 1152.51 | 9.661654 | 1151.495 | 9.72583  |
| 9.917464 | 1151.072 | 9.547872 | 1152.498 | 9.697109 | 1152.51 | 9.663    | 1151.493 | 9.726907 |
| 9.92     | 1151.068 | 9.548913 | 1152.497 | 9.7      | 1152.51 | 9.664346 | 1151.49  | 9.728792 |
| 9.921331 | 1151.066 | 9.55     | 1152.496 | 9.707109 | 1152.51 | 9.665693 | 1151.488 | 9.73     |
| 9.922559 | 1151.064 | 9.551408 | 1152.494 | 9.71     | 1152.51 | 9.67     | 1151.481 | 9.731219 |
| 9.923992 | 1151.061 | 9.552603 | 1152.492 | 9.717109 | 1152.51 | 9.671539 | 1151.478 | 9.732276 |
| 9.925246 | 1151.059 | 9.554245 | 1152.49  | 9.72     | 1152.51 | 9.672787 | 1151.476 | 9.734102 |
| 9.926661 | 1151.057 | 9.55529  | 1152.488 | 9.727109 | 1152.51 | 9.674036 | 1151.474 | 9.735331 |
| 9.928077 | 1151.054 | 9.556335 | 1152.487 | 9.73     | 1152.51 | 9.675285 | 1151.472 | 9.736618 |
| 9.929077 | 1151.053 | 9.558164 | 1152.484 | 9.737109 | 1152.51 | 9.679655 | 1151.465 | 9.74     |
| 9.930372 | 1151.051 | 9.559993 | 1152.481 | 9.74     | 1152.51 | 9.68121  | 1151.463 | 9.741471 |
| 9.931862 | 1151.048 | 9.561224 | 1152.479 | 9.747109 | 1152.51 | 9.682234 | 1151.461 | 9.75     |
| 9.9336   | 1151.045 | 9.562379 | 1152.478 | 9.75     | 1152.51 | 9.683258 | 1151.459 | 9.751471 |
| 9.935019 | 1151.043 | 9.564251 | 1152.475 | 9.757109 | 1152.51 | 9.68505  | 1151.456 | 9.76     |
| 9.936546 | 1151.04  | 9.565998 | 1152.472 | 9.76     | 1152.51 | 9.686522 | 1151.454 | 9.761471 |
| 9.938074 | 1151.038 | 9.567527 | 1152.47  | 9.767109 | 1152.51 | 9.687993 | 1151.451 | 9.77     |
| 9.939601 | 1151.035 | 9.57     | 1152.466 | 9.77     | 1152.51 | 9.689465 | 1151.449 | 9.771471 |
| 9.941084 | 1151.033 | 9.571018 | 1152.464 | 9.777109 | 1152.51 | 9.691682 | 1151.445 | 9.78     |
| 9.943011 | 1151.03  | 9.572062 | 1152.463 | 9.78     | 1152.51 | 9.693153 | 1151.443 | 9.781471 |
| 9.945662 | 1151.025 | 9.575435 | 1152.457 | 9.787109 | 1152.51 | 9.694374 | 1151.441 | 9.79     |
| 9.947349 | 1151.023 | 9.58     | 1152.45  | 9.79     | 1152.51 | 9.695595 | 1151.439 | 9.791471 |
| 9.949035 | 1151.02  | 9.583314 | 1152.445 | 9.797109 | 1152.51 | 9.696815 | 1151.437 | 9.8      |
| 9.950241 | 1151.018 | 9.59     | 1152.434 | 9.8      | 1152.51 | 9.7      | 1151.431 | 9.801471 |
| 9.9517   | 1151.015 | 9.593314 | 1152.429 | 9.807109 | 1152.51 | 9.701395 | 1151.429 | 9.81     |
| 9.953012 | 1151.013 | 9.6      | 1152.419 | 9.81     | 1152.51 | 9.702616 | 1151.427 | 9.811471 |
| 9.954817 | 1151.01  | 9.603314 | 1152.413 | 9.817109 | 1152.51 | 9.703715 | 1151.425 | 9.82     |
| 9.955966 | 1151.008 | 9.61     | 1152.403 | 9.82     | 1152.51 | 9.704813 | 1151.424 | 9.821471 |
| 9.957114 | 1151.006 | 9.613314 | 1152.398 | 9.827109 | 1152.51 | 9.705912 | 1151.422 | 9.83     |
| 9.959124 | 1151.003 | 9.62     | 1152.387 | 9.83     | 1152.51 | 9.71     | 1151.415 | 9.831471 |
| 9.960287 | 1151.001 | 9.623314 | 1152.382 | 9.837109 | 1152.51 | 9.711256 | 1151.413 | 9.84     |
| 9.961663 | 1150.999 | 9.63     | 1152.371 | 9.84     | 1152.51 | 9.712354 | 1151.411 | 9.841471 |
| 9.963011 | 1150.997 | 9.633314 | 1152.366 | 9.847109 | 1152.51 | 9.714332 | 1151.408 | 9.85     |

|          |          |          |          |          |          |          |          |          |
|----------|----------|----------|----------|----------|----------|----------|----------|----------|
| 9.964191 | 1150.995 | 9.64     | 1152.355 | 9.85     | 1152.51  | 9.718499 | 1151.401 | 9.851471 |
| 9.966255 | 1150.991 | 9.643314 | 1152.35  | 9.857109 | 1152.51  | 9.72     | 1151.398 | 9.86     |
| 9.968319 | 1150.988 | 9.65     | 1152.339 | 9.86     | 1152.51  | 9.721625 | 1151.396 | 9.861471 |
| 9.97     | 1150.985 | 9.653314 | 1152.333 | 9.867109 | 1152.51  | 9.723674 | 1151.392 | 9.87     |
| 9.971146 | 1150.983 | 9.66     | 1152.322 | 9.87     | 1152.51  | 9.724751 | 1151.391 | 9.871471 |
| 9.972285 | 1150.981 | 9.663314 | 1152.317 | 9.877109 | 1152.51  | 9.725828 | 1151.389 | 9.88     |
| 9.976312 | 1150.975 | 9.67     | 1152.306 | 9.88     | 1152.51  | 9.726905 | 1151.387 | 9.881471 |
| 9.978999 | 1150.97  | 9.673314 | 1152.301 | 9.887109 | 1152.51  | 9.728789 | 1151.384 | 9.89     |
| 9.98     | 1150.969 | 9.68     | 1152.29  | 9.89     | 1152.51  | 9.73     | 1151.382 | 9.891471 |
| 9.983071 | 1150.964 | 9.683314 | 1152.284 | 9.897109 | 1152.51  | 9.731218 | 1151.38  | 9.9      |
| 9.985757 | 1150.959 | 9.69     | 1152.273 | 9.898439 | 1152.51  | 9.732275 | 1151.378 | 9.901471 |
| 9.988175 | 1150.955 | 9.693314 | 1152.268 | 9.899654 | 1152.51  | 9.734039 | 1151.375 | 9.91     |
| 9.99     | 1150.952 | 9.7      | 1152.257 | 9.900669 | 1152.51  | 9.735295 | 1151.373 | 9.911471 |
| 9.992764 | 1150.947 | 9.703314 | 1152.252 | 9.901793 | 1152.51  | 9.736663 | 1151.371 | 9.92     |
| 9.99486  | 1150.944 | 9.71     | 1152.241 | 9.903708 | 1152.51  | 9.74     | 1151.365 | 9.921471 |
| 9.996957 | 1150.941 | 9.713314 | 1152.235 | 9.904732 | 1152.51  | 9.741563 | 1151.363 | 9.93     |
| 9.999054 | 1150.937 | 9.72     | 1152.224 | 9.905755 | 1152.51  | 9.75     | 1151.349 | 9.931471 |
| 10.00006 | 1150.935 | 9.723314 | 1152.219 | 9.906778 | 1152.51  | 9.751563 | 1151.346 | 9.94     |
| 10.00113 | 1150.934 | 9.73     | 1152.208 | 9.908415 | 1152.51  | 9.76     | 1151.332 | 9.941471 |
| 10.00227 | 1150.932 | 9.733314 | 1152.202 | 9.91     | 1152.51  | 9.761563 | 1151.33  | 9.95     |
| 10.0035  | 1150.93  | 9.74     | 1152.191 | 9.911214 | 1152.51  | 9.77     | 1151.316 | 9.951471 |
| 10.00564 | 1150.926 | 9.743314 | 1152.186 | 9.913124 | 1152.51  | 9.771563 | 1151.313 | 9.96     |
| 10.0068  | 1150.924 | 9.75     | 1152.175 | 9.914206 | 1152.51  | 9.78     | 1151.299 | 9.961471 |
| 10.00797 | 1150.922 | 9.753314 | 1152.169 | 9.915288 | 1152.51  | 9.781563 | 1151.297 | 9.97     |
| 10.00914 | 1150.92  | 9.76     | 1152.158 | 9.91637  | 1152.51  | 9.79     | 1151.283 | 9.971471 |
| 10.01017 | 1150.919 | 9.763314 | 1152.153 | 9.917453 | 1152.51  | 9.791563 | 1151.28  | 9.98     |
| 10.01156 | 1150.916 | 9.77     | 1152.142 | 9.92     | 1152.51  | 9.8      | 1151.266 | 9.981471 |
| 10.01337 | 1150.913 | 9.773314 | 1152.136 | 9.92133  | 1152.51  | 9.801563 | 1151.264 | 9.99     |
| 10.01507 | 1150.911 | 9.78     | 1152.125 | 9.922558 | 1152.51  | 9.81     | 1151.25  | 9.991471 |
| 10.01821 | 1150.905 | 9.783314 | 1152.12  | 9.923991 | 1152.51  | 9.811563 | 1151.247 | 9.993603 |
| 10.02    | 1150.902 | 9.79     | 1152.109 | 9.925245 | 1152.51  | 9.82     | 1151.233 | 9.995203 |
| 10.02109 | 1150.901 | 9.793314 | 1152.103 | 9.926659 | 1152.51  | 9.821563 | 1151.231 | 9.998001 |
| 10.02262 | 1150.898 | 9.8      | 1152.092 | 9.928074 | 1152.51  | 9.83     | 1151.217 | 9.999125 |
| 10.02387 | 1150.896 | 9.803314 | 1152.087 | 9.929075 | 1152.51  | 9.831563 | 1151.214 | 10.00025 |
| 10.02499 | 1150.894 | 9.81     | 1152.076 | 9.930128 | 1152.51  | 9.84     | 1151.2   | 10.00138 |
| 10.02611 | 1150.892 | 9.813314 | 1152.07  | 9.93114  | 1152.511 | 9.841563 | 1151.197 | 10.0027  |
| 10.02723 | 1150.89  | 9.82     | 1152.059 | 9.932164 | 1152.511 | 9.85     | 1151.184 | 10.00424 |
| 10.02836 | 1150.889 | 9.823314 | 1152.054 | 9.933299 | 1152.51  | 9.851563 | 1151.181 | 10.00558 |
| 10.0294  | 1150.887 | 9.83     | 1152.043 | 9.934426 | 1152.509 | 9.86     | 1151.167 | 10.00674 |
| 10.03045 | 1150.885 | 9.833314 | 1152.037 | 9.935862 | 1152.509 | 9.861563 | 1151.164 | 10.00791 |
| 10.03172 | 1150.883 | 9.84     | 1152.026 | 9.937297 | 1152.51  | 9.87     | 1151.15  | 10.00907 |
| 10.03302 | 1150.88  | 9.843314 | 1152.021 | 9.938732 | 1152.509 | 9.871563 | 1151.148 | 10.01009 |
| 10.03431 | 1150.876 | 9.85     | 1152.01  | 9.94     | 1152.506 | 9.88     | 1151.134 | 10.01155 |
| 10.0355  | 1150.873 | 9.853314 | 1152.004 | 9.941175 | 1152.505 | 9.881563 | 1151.131 | 10.01336 |
| 10.03693 | 1150.868 | 9.86     | 1151.993 | 9.942366 | 1152.504 | 9.89     | 1151.117 | 10.01505 |
| 10.03809 | 1150.863 | 9.863314 | 1151.988 | 9.943556 | 1152.503 | 9.891563 | 1151.115 | 10.01819 |
| 10.03918 | 1150.858 | 9.87     | 1151.977 | 9.944747 | 1152.502 | 9.9      | 1151.101 | 10.02    |

|          |          |          |          |          |          |          |          |          |
|----------|----------|----------|----------|----------|----------|----------|----------|----------|
| 10.0402  | 1150.853 | 9.873314 | 1151.971 | 9.945788 | 1152.501 | 9.901563 | 1151.098 | 10.02109 |
| 10.04137 | 1150.847 | 9.88     | 1151.96  | 9.94683  | 1152.499 | 9.91     | 1151.084 | 10.02262 |
| 10.04245 | 1150.841 | 9.883314 | 1151.955 | 9.947872 | 1152.498 | 9.911563 | 1151.082 | 10.02387 |
| 10.04393 | 1150.833 | 9.89     | 1151.944 | 9.948913 | 1152.497 | 9.92     | 1151.068 | 10.02499 |
| 10.04495 | 1150.827 | 9.893314 | 1151.938 | 9.95     | 1152.496 | 9.921563 | 1151.065 | 10.02611 |
| 10.04633 | 1150.818 | 9.9      | 1151.927 | 9.951408 | 1152.494 | 9.93     | 1151.051 | 10.02723 |
| 10.04737 | 1150.812 | 9.903314 | 1151.922 | 9.952603 | 1152.492 | 9.931563 | 1151.049 | 10.02836 |
| 10.0484  | 1150.805 | 9.91     | 1151.911 | 9.954245 | 1152.49  | 9.94     | 1151.035 | 10.02941 |
| 10.0497  | 1150.796 | 9.913314 | 1151.905 | 9.95529  | 1152.488 | 9.941563 | 1151.032 | 10.03042 |
| 10.05077 | 1150.789 | 9.92     | 1151.894 | 9.956335 | 1152.487 | 9.95     | 1151.018 | 10.03153 |
| 10.05228 | 1150.778 | 9.923314 | 1151.889 | 9.958164 | 1152.484 | 9.951563 | 1151.016 | 10.03276 |
| 10.0534  | 1150.769 | 9.93     | 1151.878 | 9.959993 | 1152.481 | 9.96     | 1151.002 | 10.03406 |
| 10.05494 | 1150.758 | 9.933314 | 1151.872 | 9.961224 | 1152.479 | 9.961563 | 1150.999 | 10.03527 |
| 10.0567  | 1150.745 | 9.94     | 1151.861 | 9.962379 | 1152.478 | 9.97     | 1150.985 | 10.03648 |
| 10.05821 | 1150.733 | 9.943314 | 1151.856 | 9.964251 | 1152.475 | 9.971563 | 1150.983 | 10.03769 |
| 10.05965 | 1150.722 | 9.95     | 1151.845 | 9.965998 | 1152.472 | 9.98     | 1150.969 | 10.0389  |
| 10.06081 | 1150.714 | 9.953314 | 1151.839 | 9.967527 | 1152.47  | 9.981563 | 1150.966 | 10.04    |
| 10.06195 | 1150.705 | 9.96     | 1151.828 | 9.97     | 1152.466 | 9.99     | 1150.952 | 10.04123 |
| 10.06322 | 1150.695 | 9.963314 | 1151.823 | 9.971018 | 1152.464 | 9.991563 | 1150.949 | 10.04246 |
| 10.06462 | 1150.684 | 9.97     | 1151.812 | 9.972062 | 1152.463 | 9.993673 | 1150.946 | 10.04363 |
| 10.06595 | 1150.674 | 9.973314 | 1151.806 | 9.975435 | 1152.457 | 9.995254 | 1150.943 | 10.04494 |
| 10.06712 | 1150.664 | 9.98     | 1151.795 | 9.98     | 1152.45  | 9.998023 | 1150.939 | 10.04603 |
| 10.06816 | 1150.655 | 9.983314 | 1151.79  | 9.983314 | 1152.445 | 9.999135 | 1150.937 | 10.04712 |
| 10.0692  | 1150.647 | 9.99     | 1151.779 | 9.99     | 1152.434 | 10.00025 | 1150.935 | 10.04834 |
| 10.07028 | 1150.638 | 9.993314 | 1151.773 | 9.993314 | 1152.429 | 10.00138 | 1150.933 | 10.04971 |
| 10.07163 | 1150.626 | 9.994985 | 1151.77  | 9.994985 | 1152.427 | 10.0027  | 1150.931 | 10.05078 |
| 10.07271 | 1150.617 | 9.996239 | 1151.768 | 9.996239 | 1152.425 | 10.00424 | 1150.929 | 10.05227 |
| 10.07393 | 1150.607 | 9.998433 | 1151.765 | 9.998433 | 1152.421 | 10.00558 | 1150.926 | 10.05336 |
| 10.07516 | 1150.596 | 9.99958  | 1151.763 | 9.99958  | 1152.419 | 10.00674 | 1150.924 | 10.05462 |
| 10.07661 | 1150.584 | 10.00072 | 1151.761 | 10.00072 | 1152.418 | 10.00791 | 1150.922 | 10.05605 |
| 10.07799 | 1150.572 | 10.00191 | 1151.759 | 10.00191 | 1152.416 | 10.00907 | 1150.921 | 10.05733 |
| 10.0792  | 1150.561 | 10.00355 | 1151.756 | 10.00355 | 1152.413 | 10.01009 | 1150.919 | 10.05861 |
| 10.08044 | 1150.55  | 10.00566 | 1151.753 | 10.00566 | 1152.41  | 10.01155 | 1150.916 | 10.0599  |
| 10.0819  | 1150.537 | 10.00683 | 1151.751 | 10.00683 | 1152.408 | 10.01336 | 1150.913 | 10.06098 |
| 10.08322 | 1150.526 | 10.008   | 1151.749 | 10.008   | 1152.406 | 10.01505 | 1150.911 | 10.06216 |
| 10.08472 | 1150.513 | 10.00917 | 1151.747 | 10.00917 | 1152.404 | 10.01819 | 1150.905 | 10.06337 |
| 10.08622 | 1150.5   | 10.01017 | 1151.745 | 10.01017 | 1152.403 | 10.02    | 1150.902 | 10.06448 |
| 10.08772 | 1150.487 | 10.01157 | 1151.743 | 10.01157 | 1152.4   | 10.02109 | 1150.901 | 10.06558 |
| 10.09    | 1150.467 | 10.01338 | 1151.74  | 10.01338 | 1152.398 | 10.02262 | 1150.898 | 10.06669 |
| 10.09178 | 1150.452 | 10.01509 | 1151.737 | 10.01508 | 1152.395 | 10.02387 | 1150.896 | 10.06819 |
| 10.09327 | 1150.439 | 10.01823 | 1151.732 | 10.01822 | 1152.39  | 10.02499 | 1150.894 | 10.06969 |
| 10.09532 | 1150.422 | 10.02    | 1151.729 | 10.02    | 1152.387 | 10.02611 | 1150.892 | 10.07076 |
| 10.09662 | 1150.41  | 10.02109 | 1151.727 | 10.02109 | 1152.385 | 10.02723 | 1150.89  | 10.0718  |
| 10.09792 | 1150.399 | 10.02262 | 1151.725 | 10.02262 | 1152.383 | 10.02836 | 1150.889 | 10.07297 |
| 10.1     | 1150.381 | 10.02387 | 1151.723 | 10.02386 | 1152.381 | 10.02941 | 1150.887 | 10.07415 |
| 10.10164 | 1150.366 | 10.02499 | 1151.721 | 10.02498 | 1152.379 | 10.03044 | 1150.885 | 10.07576 |
| 10.10301 | 1150.354 | 10.02611 | 1151.719 | 10.02611 | 1152.377 | 10.03151 | 1150.883 | 10.07702 |

|          |          |          |          |          |          |          |          |          |
|----------|----------|----------|----------|----------|----------|----------|----------|----------|
| 10.10491 | 1150.337 | 10.02723 | 1151.717 | 10.02723 | 1152.376 | 10.03266 | 1150.881 | 10.07827 |
| 10.10611 | 1150.327 | 10.02836 | 1151.715 | 10.02835 | 1152.374 | 10.03413 | 1150.877 | 10.07953 |
| 10.10732 | 1150.316 | 10.02938 | 1151.713 | 10.02938 | 1152.372 | 10.03572 | 1150.872 | 10.08065 |
| 10.10943 | 1150.298 | 10.0304  | 1151.712 | 10.0304  | 1152.37  | 10.03695 | 1150.868 | 10.08184 |
| 10.11057 | 1150.287 | 10.03141 | 1151.71  | 10.03141 | 1152.369 | 10.03806 | 1150.863 | 10.08308 |
| 10.11236 | 1150.272 | 10.03251 | 1151.708 | 10.03251 | 1152.366 | 10.03916 | 1150.858 | 10.08417 |
| 10.11369 | 1150.26  | 10.03384 | 1151.704 | 10.03384 | 1152.363 | 10.0402  | 1150.853 | 10.08526 |
| 10.11553 | 1150.244 | 10.03529 | 1151.7   | 10.03529 | 1152.359 | 10.04136 | 1150.847 | 10.08716 |
| 10.11671 | 1150.234 | 10.03644 | 1151.696 | 10.03644 | 1152.355 | 10.04243 | 1150.841 | 10.09    |
| 10.11788 | 1150.224 | 10.03759 | 1151.692 | 10.03759 | 1152.351 | 10.04391 | 1150.833 | 10.09109 |
| 10.11993 | 1150.206 | 10.03873 | 1151.687 | 10.03873 | 1152.346 | 10.04493 | 1150.827 | 10.0928  |
| 10.12097 | 1150.197 | 10.03988 | 1151.681 | 10.03988 | 1152.341 | 10.04631 | 1150.819 | 10.0944  |
| 10.12215 | 1150.187 | 10.04104 | 1151.675 | 10.04104 | 1152.334 | 10.04735 | 1150.812 | 10.0958  |
| 10.12332 | 1150.176 | 10.04219 | 1151.669 | 10.04219 | 1152.328 | 10.04839 | 1150.805 | 10.0972  |
| 10.12494 | 1150.162 | 10.04326 | 1151.663 | 10.04325 | 1152.323 | 10.04968 | 1150.796 | 10.0986  |
| 10.12596 | 1150.153 | 10.04436 | 1151.657 | 10.04436 | 1152.316 | 10.05077 | 1150.789 | 10.1     |
| 10.12699 | 1150.144 | 10.04579 | 1151.648 | 10.04579 | 1152.308 | 10.0523  | 1150.778 | 10.10172 |
| 10.12879 | 1150.129 | 10.04729 | 1151.639 | 10.04729 | 1152.298 | 10.05343 | 1150.769 | 10.10316 |
| 10.13    | 1150.118 | 10.04833 | 1151.632 | 10.04833 | 1152.291 | 10.05499 | 1150.758 | 10.10514 |
| 10.13122 | 1150.107 | 10.04963 | 1151.623 | 10.04963 | 1152.283 | 10.05667 | 1150.745 | 10.1064  |
| 10.13238 | 1150.097 | 10.05078 | 1151.615 | 10.05078 | 1152.275 | 10.05811 | 1150.734 | 10.10766 |
| 10.1334  | 1150.088 | 10.05233 | 1151.604 | 10.05233 | 1152.264 | 10.05955 | 1150.723 | 10.10986 |
| 10.13463 | 1150.077 | 10.05348 | 1151.596 | 10.05348 | 1152.255 | 10.06084 | 1150.713 | 10.11109 |
| 10.13631 | 1150.063 | 10.05505 | 1151.584 | 10.05505 | 1152.243 | 10.062   | 1150.705 | 10.11244 |
| 10.13792 | 1150.048 | 10.05672 | 1151.571 | 10.05672 | 1152.231 | 10.06328 | 1150.695 | 10.11381 |
| 10.14    | 1150.03  | 10.05814 | 1151.561 | 10.05814 | 1152.22  | 10.0647  | 1150.684 | 10.11571 |
| 10.1423  | 1150.01  | 10.05957 | 1151.55  | 10.05957 | 1152.209 | 10.06605 | 1150.673 | 10.11691 |
| 10.14363 | 1149.999 | 10.06084 | 1151.54  | 10.06084 | 1152.2   | 10.06724 | 1150.663 | 10.11812 |
| 10.14496 | 1149.987 | 10.06201 | 1151.531 | 10.06201 | 1152.191 | 10.0683  | 1150.654 | 10.12    |
| 10.14962 | 1149.946 | 10.0633  | 1151.521 | 10.0633  | 1152.181 | 10.06936 | 1150.645 | 10.1214  |
| 10.15067 | 1149.937 | 10.06474 | 1151.51  | 10.06473 | 1152.17  | 10.07042 | 1150.636 | 10.12256 |
| 10.15267 | 1149.92  | 10.06609 | 1151.499 | 10.06609 | 1152.159 | 10.07153 | 1150.627 | 10.12416 |
| 10.15394 | 1149.908 | 10.0673  | 1151.489 | 10.0673  | 1152.149 | 10.07272 | 1150.617 | 10.12518 |
| 10.15617 | 1149.889 | 10.06838 | 1151.48  | 10.06838 | 1152.14  | 10.07397 | 1150.606 | 10.1262  |
| 10.15813 | 1149.872 | 10.06947 | 1151.471 | 10.06947 | 1152.131 | 10.07523 | 1150.595 | 10.12798 |
| 10.16    | 1149.855 | 10.07057 | 1151.462 | 10.07056 | 1152.122 | 10.0765  | 1150.584 | 10.13    |
| 10.16224 | 1149.836 | 10.0717  | 1151.452 | 10.07169 | 1152.112 | 10.07777 | 1150.574 | 10.13122 |
| 10.1642  | 1149.818 | 10.07295 | 1151.442 | 10.0727  | 1152.104 | 10.07895 | 1150.563 | 10.1324  |
| 10.16596 | 1149.803 | 10.07431 | 1151.43  | 10.07391 | 1152.094 | 10.08    | 1150.554 | 10.13344 |
| 10.16773 | 1149.788 | 10.07551 | 1151.42  | 10.07511 | 1152.083 | 10.08136 | 1150.542 | 10.13525 |
| 10.16949 | 1149.772 | 10.07666 | 1151.41  | 10.07611 | 1152.075 | 10.08249 | 1150.532 | 10.13632 |
| 10.17202 | 1149.75  | 10.07774 | 1151.401 | 10.07719 | 1152.065 | 10.08404 | 1150.519 | 10.13865 |
| 10.17376 | 1149.735 | 10.07888 | 1151.391 | 10.07827 | 1152.056 | 10.08675 | 1150.495 | 10.13999 |
| 10.17551 | 1149.719 | 10.08    | 1151.381 | 10.07947 | 1152.046 | 10.08848 | 1150.48  | 10.14153 |
| 10.17733 | 1149.703 | 10.08153 | 1151.367 | 10.08097 | 1152.033 | 10.09    | 1150.467 | 10.1429  |
| 10.17858 | 1149.691 | 10.08266 | 1151.358 | 10.0821  | 1152.023 | 10.09104 | 1150.459 | 10.14426 |
| 10.17983 | 1149.678 | 10.08456 | 1151.341 | 10.08323 | 1152.013 | 10.09271 | 1150.444 | 10.14563 |

|          |          |          |          |          |          |          |          |          |
|----------|----------|----------|----------|----------|----------|----------|----------|----------|
| 10.18143 | 1149.661 | 10.08589 | 1151.33  | 10.08456 | 1152.001 | 10.0943  | 1150.431 | 10.15    |
| 10.18246 | 1149.648 | 10.08722 | 1151.318 | 10.0859  | 1151.99  | 10.09568 | 1150.418 | 10.15156 |
| 10.18348 | 1149.633 | 10.09    | 1151.294 | 10.08723 | 1151.978 | 10.09707 | 1150.406 | 10.15304 |
| 10.18451 | 1149.616 | 10.09172 | 1151.28  | 10.09    | 1151.955 | 10.09846 | 1150.394 | 10.15453 |
| 10.1881  | 1149.549 | 10.09318 | 1151.267 | 10.09172 | 1151.94  | 10.1     | 1150.381 | 10.15601 |
| 10.19    | 1149.507 | 10.09518 | 1151.25  | 10.09318 | 1151.928 | 10.10171 | 1150.365 | 10.16    |
| 10.19171 | 1149.467 | 10.09645 | 1151.239 | 10.09517 | 1151.91  | 10.10315 | 1150.353 | 10.1617  |
| 10.19381 | 1149.416 | 10.09868 | 1151.219 | 10.09645 | 1151.899 | 10.10512 | 1150.335 | 10.1633  |
| 10.19481 | 1149.39  | 10.1     | 1151.208 | 10.09867 | 1151.88  | 10.10638 | 1150.324 | 10.16491 |
| 10.19581 | 1149.364 | 10.10115 | 1151.197 | 10.1     | 1151.868 | 10.10763 | 1150.313 | 10.16652 |
| 10.19681 | 1149.338 | 10.10261 | 1151.185 | 10.10115 | 1151.858 | 10.10983 | 1150.294 | 10.17    |
| 10.19856 | 1149.29  | 10.10414 | 1151.171 | 10.10261 | 1151.845 | 10.11109 | 1150.283 | 10.17184 |
| 10.2     | 1149.248 | 10.10624 | 1151.153 | 10.10414 | 1151.832 | 10.11243 | 1150.271 | 10.17357 |
| 10.20114 | 1149.213 | 10.10758 | 1151.141 | 10.10624 | 1151.813 | 10.11381 | 1150.259 | 10.17531 |
| 10.20303 | 1149.152 | 10.10892 | 1151.129 | 10.10757 | 1151.802 | 10.1157  | 1150.243 | 10.17704 |
| 10.20481 | 1149.091 | 10.11    | 1151.12  | 10.10891 | 1151.79  | 10.11691 | 1150.232 | 10.18    |
| 10.20638 | 1149.035 | 10.11159 | 1151.106 | 10.11    | 1151.78  | 10.11811 | 1150.222 | 10.18198 |
| 10.20794 | 1148.976 | 10.11291 | 1151.094 | 10.11158 | 1151.766 | 10.12    | 1150.205 | 10.18384 |
| 10.2095  | 1148.916 | 10.11473 | 1151.078 | 10.11291 | 1151.755 | 10.1214  | 1150.193 | 10.18571 |
| 10.21054 | 1148.875 | 10.11588 | 1151.068 | 10.11472 | 1151.739 | 10.12256 | 1150.183 | 10.18757 |
| 10.21204 | 1148.813 | 10.11704 | 1151.058 | 10.11588 | 1151.729 | 10.12416 | 1150.169 | 10.19    |
| 10.21376 | 1148.741 | 10.11907 | 1151.041 | 10.11704 | 1151.719 | 10.12518 | 1150.16  | 10.19213 |
| 10.21613 | 1148.637 | 10.12029 | 1151.03  | 10.11906 | 1151.702 | 10.1262  | 1150.151 | 10.19411 |
| 10.21764 | 1148.569 | 10.12141 | 1151.02  | 10.12029 | 1151.691 | 10.12798 | 1150.136 | 10.1961  |
| 10.22    | 1148.458 | 10.12277 | 1151.009 | 10.12141 | 1151.681 | 10.13    | 1150.118 | 10.19809 |
| 10.22108 | 1148.405 | 10.12397 | 1150.998 | 10.12277 | 1151.669 | 10.13122 | 1150.107 | 10.2     |
| 10.223   | 1148.307 | 10.12502 | 1150.989 | 10.12397 | 1151.659 | 10.1324  | 1150.097 | 10.20227 |
| 10.22565 | 1148.168 | 10.12607 | 1150.98  | 10.12502 | 1151.65  | 10.13344 | 1150.088 | 10.20439 |
| 10.22733 | 1148.076 | 10.12712 | 1150.971 | 10.12607 | 1151.641 | 10.13525 | 1150.072 | 10.2065  |
| 10.22902 | 1147.982 | 10.12895 | 1150.955 | 10.12711 | 1151.632 | 10.13631 | 1150.063 | 10.20861 |
| 10.23024 | 1147.913 | 10.13    | 1150.945 | 10.12895 | 1151.615 | 10.13773 | 1150.05  | 10.21    |
| 10.2322  | 1147.798 | 10.13124 | 1150.934 | 10.13    | 1151.606 | 10.14    | 1150.03  | 10.21242 |
| 10.23405 | 1147.686 | 10.13242 | 1150.924 | 10.13124 | 1151.595 | 10.14212 | 1150.012 | 10.21466 |
| 10.2366  | 1147.528 | 10.13346 | 1150.915 | 10.13242 | 1151.585 | 10.14344 | 1150     | 10.2169  |
| 10.23822 | 1147.424 | 10.13527 | 1150.899 | 10.13346 | 1151.576 | 10.14493 | 1149.987 | 10.21914 |
| 10.24    | 1147.308 | 10.13632 | 1150.89  | 10.13527 | 1151.56  | 10.14642 | 1149.974 | 10.22032 |
| 10.24119 | 1147.228 | 10.13732 | 1150.881 | 10.13632 | 1151.551 | 10.14791 | 1149.961 | 10.22256 |
| 10.24225 | 1147.155 | 10.13928 | 1150.864 | 10.13732 | 1151.542 | 10.15    | 1149.943 | 10.22493 |
| 10.24331 | 1147.082 | 10.14167 | 1150.843 | 10.13927 | 1151.525 | 10.1517  | 1149.928 | 10.2273  |
| 10.24437 | 1147.007 | 10.14304 | 1150.831 | 10.14166 | 1151.504 | 10.1532  | 1149.915 | 10.22966 |
| 10.24623 | 1146.875 | 10.14441 | 1150.819 | 10.14301 | 1151.493 | 10.15469 | 1149.902 | 10.23271 |
| 10.24809 | 1146.739 | 10.14578 | 1150.807 | 10.14437 | 1151.481 | 10.15618 | 1149.889 | 10.2352  |
| 10.24995 | 1146.601 | 10.15    | 1150.771 | 10.14573 | 1151.469 | 10.16    | 1149.855 | 10.23769 |
| 10.25131 | 1146.498 | 10.15157 | 1150.757 | 10.15    | 1151.432 | 10.16171 | 1149.84  | 10.24    |
| 10.25248 | 1146.408 | 10.15305 | 1150.744 | 10.15155 | 1151.418 | 10.16332 | 1149.826 | 10.24285 |
| 10.25365 | 1146.316 | 10.15454 | 1150.731 | 10.15302 | 1151.405 | 10.16493 | 1149.812 | 10.24547 |
| 10.25482 | 1146.223 | 10.15602 | 1150.718 | 10.15448 | 1151.393 | 10.16654 | 1149.798 | 10.24809 |



|          |          |          |          |          |          |          |          |          |
|----------|----------|----------|----------|----------|----------|----------|----------|----------|
| 10.25686 | 1146.059 | 10.16    | 1150.683 | 10.15595 | 1151.38  | 10.17    | 1149.768 | 10.25    |
| 10.2589  | 1145.891 | 10.1617  | 1150.668 | 10.16    | 1151.344 | 10.17184 | 1149.752 | 10.25299 |
| 10.26    | 1145.799 | 10.16331 | 1150.654 | 10.16167 | 1151.33  | 10.17358 | 1149.736 | 10.25461 |
| 10.26143 | 1145.677 | 10.16491 | 1150.64  | 10.16326 | 1151.316 | 10.17532 | 1149.721 | 10.25579 |
| 10.2627  | 1145.567 | 10.16652 | 1150.626 | 10.16484 | 1151.302 | 10.17673 | 1149.709 | 10.25766 |
| 10.26385 | 1145.467 | 10.17    | 1150.596 | 10.16643 | 1151.288 | 10.17819 | 1149.695 | 10.25924 |
| 10.26499 | 1145.366 | 10.17184 | 1150.58  | 10.17    | 1151.257 | 10.17965 | 1149.68  | 10.2618  |
| 10.26613 | 1145.263 | 10.17357 | 1150.564 | 10.17181 | 1151.241 | 10.18167 | 1149.658 | 10.26337 |
| 10.26813 | 1145.082 | 10.17531 | 1150.549 | 10.17352 | 1151.226 | 10.18312 | 1149.638 | 10.26456 |
| 10.27    | 1144.91  | 10.17704 | 1150.534 | 10.17523 | 1151.211 | 10.18431 | 1149.619 | 10.26575 |
| 10.27148 | 1144.771 | 10.18    | 1150.508 | 10.17693 | 1151.196 | 10.18549 | 1149.598 | 10.26693 |
| 10.2728  | 1144.645 | 10.18198 | 1150.491 | 10.18    | 1151.17  | 10.18667 | 1149.576 | 10.27    |
| 10.27413 | 1144.516 | 10.18384 | 1150.475 | 10.18195 | 1151.153 | 10.19    | 1149.506 | 10.27136 |
| 10.27546 | 1144.386 | 10.18571 | 1150.458 | 10.18378 | 1151.137 | 10.19135 | 1149.475 | 10.27255 |
| 10.27778 | 1144.156 | 10.18757 | 1150.442 | 10.18561 | 1151.121 | 10.19253 | 1149.446 | 10.27445 |
| 10.28    | 1143.932 | 10.19    | 1150.421 | 10.18743 | 1151.105 | 10.19439 | 1149.4   | 10.27952 |
| 10.28165 | 1143.762 | 10.19213 | 1150.402 | 10.19    | 1151.082 | 10.19879 | 1149.283 | 10.28059 |
| 10.28312 | 1143.608 | 10.19411 | 1150.385 | 10.19209 | 1151.064 | 10.2     | 1149.247 | 10.28183 |
| 10.28459 | 1143.453 | 10.1961  | 1150.367 | 10.19404 | 1151.047 | 10.20162 | 1149.198 | 10.28342 |
| 10.28606 | 1143.295 | 10.19809 | 1150.35  | 10.19599 | 1151.03  | 10.20305 | 1149.151 | 10.28481 |
| 10.28864 | 1143.015 | 10.2     | 1150.333 | 10.19794 | 1151.013 | 10.20431 | 1149.109 | 10.28619 |
| 10.29    | 1142.865 | 10.20227 | 1150.313 | 10.2     | 1150.995 | 10.20556 | 1149.065 | 10.28862 |
| 10.2918  | 1142.663 | 10.20439 | 1150.295 | 10.20223 | 1150.975 | 10.20775 | 1148.984 | 10.29    |
| 10.29341 | 1142.481 | 10.2065  | 1150.276 | 10.2043  | 1150.957 | 10.20994 | 1148.899 | 10.29138 |
| 10.29485 | 1142.316 | 10.20861 | 1150.258 | 10.20637 | 1150.939 | 10.21128 | 1148.845 | 10.29254 |
| 10.29629 | 1142.148 | 10.21    | 1150.246 | 10.20844 | 1150.921 | 10.21235 | 1148.801 | 10.29453 |
| 10.29773 | 1141.979 | 10.21242 | 1150.224 | 10.21    | 1150.907 | 10.21424 | 1148.72  | 10.29726 |
| 10.3     | 1141.709 | 10.21466 | 1150.205 | 10.21237 | 1150.887 | 10.21683 | 1148.606 | 10.299   |
| 10.30165 | 1141.511 | 10.2169  | 1150.185 | 10.21456 | 1150.867 | 10.21847 | 1148.53  | 10.30025 |
| 10.30298 | 1141.347 | 10.21914 | 1150.165 | 10.21675 | 1150.848 | 10.22    | 1148.458 | 10.30224 |
| 10.30432 | 1141.182 | 10.22032 | 1150.155 | 10.21894 | 1150.829 | 10.22113 | 1148.403 | 10.30413 |
| 10.30566 | 1141.016 | 10.22256 | 1150.135 | 10.22    | 1150.82  | 10.22301 | 1148.307 | 10.30673 |
| 10.31    | 1140.465 | 10.22493 | 1150.115 | 10.2225  | 1150.798 | 10.22479 | 1148.214 | 10.30838 |
| 10.31153 | 1140.268 | 10.2273  | 1150.094 | 10.22482 | 1150.778 | 10.22635 | 1148.13  | 10.31    |
| 10.31295 | 1140.082 | 10.22966 | 1150.073 | 10.22713 | 1150.757 | 10.22792 | 1148.044 | 10.31119 |
| 10.31437 | 1139.895 | 10.23271 | 1150.046 | 10.22944 | 1150.737 | 10.23    | 1147.926 | 10.31225 |
| 10.31578 | 1139.705 | 10.2352  | 1150.025 | 10.23264 | 1150.709 | 10.23112 | 1147.861 | 10.31331 |
| 10.32    | 1139.134 | 10.23769 | 1150.003 | 10.23507 | 1150.688 | 10.23213 | 1147.802 | 10.31437 |
| 10.32162 | 1138.91  | 10.24    | 1149.983 | 10.23751 | 1150.667 | 10.23313 | 1147.741 | 10.31622 |
| 10.32314 | 1138.698 | 10.24285 | 1149.958 | 10.23994 | 1150.645 | 10.23414 | 1147.68  | 10.31808 |
| 10.32465 | 1138.483 | 10.24547 | 1149.935 | 10.24278 | 1150.62  | 10.23589 | 1147.572 | 10.31993 |
| 10.32617 | 1138.267 | 10.24809 | 1149.912 | 10.24533 | 1150.598 | 10.23765 | 1147.461 | 10.3213  |
| 10.33    | 1137.713 | 10.25    | 1149.895 | 10.24788 | 1150.576 | 10.23941 | 1147.347 | 10.32245 |
| 10.33173 | 1137.459 | 10.25299 | 1149.868 | 10.25    | 1150.557 | 10.24061 | 1147.267 | 10.32348 |
| 10.33335 | 1137.218 | 10.25459 | 1149.854 | 10.25292 | 1150.532 | 10.24232 | 1147.15  | 10.32451 |
| 10.33497 | 1136.975 | 10.25577 | 1149.844 | 10.25559 | 1150.508 | 10.24429 | 1147.013 | 10.32555 |
| 10.33658 | 1136.73  | 10.25765 | 1149.824 | 10.25826 | 1150.485 | 10.24699 | 1146.819 | 10.32736 |

|          |          |          |          |          |          |          |          |          |
|----------|----------|----------|----------|----------|----------|----------|----------|----------|
| 10.34    | 1136.205 | 10.25922 | 1149.804 | 10.26    | 1150.47  | 10.24871 | 1146.693 | 10.32916 |
| 10.34185 | 1135.918 | 10.26022 | 1149.791 | 10.26305 | 1150.443 | 10.25    | 1146.597 | 10.33026 |
| 10.34357 | 1135.646 | 10.2618  | 1149.768 | 10.26585 | 1150.418 | 10.25127 | 1146.501 | 10.33133 |
| 10.34529 | 1135.372 | 10.26337 | 1149.74  | 10.26864 | 1150.394 | 10.2524  | 1146.413 | 10.33252 |
| 10.347   | 1135.095 | 10.26456 | 1149.718 | 10.27    | 1150.382 | 10.25354 | 1146.324 | 10.33371 |
| 10.35    | 1134.609 | 10.26574 | 1149.693 | 10.27319 | 1150.354 | 10.25468 | 1146.234 | 10.3349  |
| 10.35196 | 1134.286 | 10.26693 | 1149.668 | 10.2761  | 1150.328 | 10.25666 | 1146.075 | 10.33699 |
| 10.35379 | 1133.981 | 10.27    | 1149.599 | 10.27901 | 1150.303 | 10.25865 | 1145.911 | 10.33907 |
| 10.35561 | 1133.674 | 10.27136 | 1149.566 | 10.28042 | 1150.291 | 10.26    | 1145.799 | 10.3403  |
| 10.35744 | 1133.364 | 10.27254 | 1149.536 | 10.28333 | 1150.265 | 10.26141 | 1145.678 | 10.34148 |
| 10.36    | 1132.924 | 10.27445 | 1149.487 | 10.28636 | 1150.239 | 10.26267 | 1145.57  | 10.34279 |
| 10.36208 | 1132.563 | 10.27952 | 1149.34  | 10.28939 | 1150.212 | 10.26393 | 1145.459 | 10.34411 |
| 10.36402 | 1132.224 | 10.28059 | 1149.306 | 10.29043 | 1150.203 | 10.26519 | 1145.348 | 10.34542 |
| 10.36595 | 1131.881 | 10.28184 | 1149.264 | 10.29346 | 1150.176 | 10.26739 | 1145.15  | 10.34772 |
| 10.36788 | 1131.535 | 10.28342 | 1149.209 | 10.29662 | 1150.149 | 10.26959 | 1144.948 | 10.35    |
| 10.37    | 1131.152 | 10.28481 | 1149.159 | 10.29977 | 1150.121 | 10.27076 | 1144.839 | 10.35161 |
| 10.37221 | 1130.751 | 10.2862  | 1149.107 | 10.3036  | 1150.087 | 10.27292 | 1144.634 | 10.35304 |
| 10.37425 | 1130.374 | 10.28863 | 1149.013 | 10.30687 | 1150.059 | 10.27415 | 1144.514 | 10.35433 |
| 10.37629 | 1129.993 | 10.29    | 1148.958 | 10.31    | 1150.031 | 10.27539 | 1144.393 | 10.35561 |
| 10.37833 | 1129.609 | 10.29138 | 1148.9   | 10.31374 | 1149.998 | 10.27662 | 1144.271 | 10.3569  |
| 10.38    | 1129.292 | 10.29254 | 1148.851 | 10.31671 | 1149.972 | 10.27879 | 1144.055 | 10.35915 |
| 10.38233 | 1128.847 | 10.29453 | 1148.764 | 10.31789 | 1149.962 | 10.28    | 1143.932 | 10.36032 |
| 10.38448 | 1128.431 | 10.29726 | 1148.638 | 10.31964 | 1149.945 | 10.2816  | 1143.768 | 10.36166 |
| 10.38663 | 1128.01  | 10.299   | 1148.555 | 10.322   | 1149.921 | 10.28303 | 1143.618 | 10.36315 |
| 10.38878 | 1127.586 | 10.30025 | 1148.494 | 10.32375 | 1149.898 | 10.28446 | 1143.466 | 10.36464 |
| 10.39    | 1127.344 | 10.30224 | 1148.392 | 10.32514 | 1149.877 | 10.2859  | 1143.312 | 10.36613 |
| 10.39246 | 1126.854 | 10.30413 | 1148.292 | 10.32653 | 1149.853 | 10.28841 | 1143.04  | 10.36874 |
| 10.39472 | 1126.396 | 10.30673 | 1148.15  | 10.32792 | 1149.827 | 10.29    | 1142.865 | 10.37    |
| 10.39699 | 1125.932 | 10.30838 | 1148.057 | 10.33    | 1149.786 | 10.29178 | 1142.665 | 10.37185 |
| 10.39925 | 1125.465 | 10.31    | 1147.964 | 10.33159 | 1149.751 | 10.29337 | 1142.485 | 10.37349 |
| 10.40032 | 1125.242 | 10.31119 | 1147.894 | 10.33298 | 1149.719 | 10.29496 | 1142.302 | 10.37514 |
| 10.40259 | 1124.771 | 10.31225 | 1147.831 | 10.33405 | 1149.694 | 10.29654 | 1142.117 | 10.37678 |
| 10.40497 | 1124.268 | 10.31331 | 1147.766 | 10.33512 | 1149.668 | 10.29932 | 1141.79  | 10.37966 |
| 10.40735 | 1123.759 | 10.31437 | 1147.7   | 10.33619 | 1149.642 | 10.3004  | 1141.661 | 10.38099 |
| 10.40973 | 1123.246 | 10.31622 | 1147.584 | 10.34    | 1149.541 | 10.30194 | 1141.474 | 10.38201 |
| 10.41272 | 1122.597 | 10.31808 | 1147.464 | 10.341   | 1149.513 | 10.30367 | 1141.262 | 10.3838  |
| 10.41522 | 1122.047 | 10.31993 | 1147.341 | 10.34259 | 1149.465 | 10.30522 | 1141.07  | 10.3854  |
| 10.41772 | 1121.491 | 10.3213  | 1147.249 | 10.34479 | 1149.396 | 10.30677 | 1140.875 | 10.387   |
| 10.42    | 1120.978 | 10.32245 | 1147.169 | 10.34723 | 1149.313 | 10.30832 | 1140.678 | 10.38861 |
| 10.42285 | 1120.334 | 10.32348 | 1147.097 | 10.34943 | 1149.234 | 10.31    | 1140.463 | 10.39    |
| 10.42547 | 1119.734 | 10.32451 | 1147.024 | 10.35069 | 1149.186 | 10.31177 | 1140.234 | 10.39183 |
| 10.42809 | 1119.128 | 10.32555 | 1146.95  | 10.3525  | 1149.116 | 10.31321 | 1140.046 | 10.39331 |
| 10.43    | 1118.683 | 10.32736 | 1146.818 | 10.35354 | 1149.074 | 10.31464 | 1139.856 | 10.39479 |
| 10.43299 | 1117.982 | 10.32917 | 1146.684 | 10.35457 | 1149.032 | 10.31607 | 1139.664 | 10.39627 |
| 10.43573 | 1117.33  | 10.33026 | 1146.602 | 10.35561 | 1148.989 | 10.32    | 1139.131 | 10.4     |
| 10.43847 | 1116.671 | 10.33133 | 1146.52  | 10.35743 | 1148.911 | 10.32164 | 1138.905 | 10.40169 |
| 10.44    | 1116.301 | 10.33252 | 1146.427 | 10.35924 | 1148.832 | 10.32316 | 1138.693 | 10.40326 |

|          |          |          |          |          |          |          |          |          |
|----------|----------|----------|----------|----------|----------|----------|----------|----------|
| 10.44313 | 1115.541 | 10.33371 | 1146.333 | 10.36026 | 1148.786 | 10.32467 | 1138.478 | 10.40482 |
| 10.446   | 1114.833 | 10.3349  | 1146.238 | 10.36231 | 1148.689 | 10.32619 | 1138.262 | 10.40639 |
| 10.44886 | 1114.118 | 10.33699 | 1146.069 | 10.36426 | 1148.594 | 10.33    | 1137.711 | 10.41    |
| 10.45    | 1113.833 | 10.33907 | 1145.897 | 10.36694 | 1148.458 | 10.33173 | 1137.457 | 10.41179 |
| 10.45327 | 1113.01  | 10.3403  | 1145.794 | 10.36864 | 1148.368 | 10.33335 | 1137.216 | 10.41346 |
| 10.45627 | 1112.244 | 10.34148 | 1145.693 | 10.37    | 1148.295 | 10.33497 | 1136.972 | 10.41512 |
| 10.45926 | 1111.471 | 10.34279 | 1145.579 | 10.37122 | 1148.229 | 10.33659 | 1136.727 | 10.41679 |
| 10.46043 | 1111.168 | 10.34411 | 1145.463 | 10.3723  | 1148.168 | 10.34    | 1136.203 | 10.42    |
| 10.46342 | 1110.389 | 10.34542 | 1145.346 | 10.37338 | 1148.106 | 10.34185 | 1135.915 | 10.42191 |
| 10.46654 | 1109.563 | 10.34772 | 1145.139 | 10.37446 | 1148.044 | 10.34357 | 1135.644 | 10.42368 |
| 10.46967 | 1108.728 | 10.35    | 1144.93  | 10.37636 | 1147.932 | 10.34529 | 1135.369 | 10.42545 |
| 10.47357 | 1107.679 | 10.35161 | 1144.778 | 10.37825 | 1147.818 | 10.34701 | 1135.093 | 10.42722 |
| 10.47683 | 1106.789 | 10.35304 | 1144.642 | 10.38    | 1147.71  | 10.35    | 1134.606 | 10.43    |
| 10.48    | 1105.912 | 10.35433 | 1144.517 | 10.38131 | 1147.626 | 10.35197 | 1134.283 | 10.43203 |
| 10.48372 | 1104.879 | 10.35562 | 1144.391 | 10.38247 | 1147.551 | 10.35379 | 1133.979 | 10.4339  |
| 10.48711 | 1103.922 | 10.3569  | 1144.264 | 10.38352 | 1147.482 | 10.35561 | 1133.671 | 10.43578 |
| 10.49    | 1103.1   | 10.35915 | 1144.039 | 10.38456 | 1147.413 | 10.35744 | 1133.361 | 10.43766 |
| 10.49388 | 1101.991 | 10.36032 | 1143.92  | 10.38561 | 1147.342 | 10.36    | 1132.922 | 10.44    |
| 10.49741 | 1100.962 | 10.36166 | 1143.783 | 10.38743 | 1147.217 | 10.36208 | 1132.561 | 10.44215 |
| 10.5     | 1100.203 | 10.36315 | 1143.627 | 10.38926 | 1147.09  | 10.36402 | 1132.221 | 10.44414 |
| 10.50404 | 1099.012 | 10.36464 | 1143.47  | 10.39026 | 1147.019 | 10.36595 | 1131.878 | 10.44613 |
| 10.50772 | 1097.908 | 10.36613 | 1143.311 | 10.39133 | 1146.941 | 10.36788 | 1131.532 | 10.44812 |
| 10.51    | 1097.22  | 10.36874 | 1143.029 | 10.39253 | 1146.854 | 10.37    | 1131.149 | 10.45    |
| 10.51421 | 1095.943 | 10.37    | 1142.89  | 10.39372 | 1146.765 | 10.37221 | 1130.748 | 10.45227 |
| 10.52    | 1094.146 | 10.37185 | 1142.684 | 10.39491 | 1146.675 | 10.37425 | 1130.371 | 10.45437 |
| 10.52421 | 1092.833 | 10.37349 | 1142.498 | 10.397   | 1146.516 | 10.37629 | 1129.99  | 10.45648 |
| 10.52665 | 1092.062 | 10.37514 | 1142.309 | 10.39909 | 1146.353 | 10.37833 | 1129.606 | 10.45858 |
| 10.52877 | 1091.396 | 10.37678 | 1142.118 | 10.4003  | 1146.257 | 10.38    | 1129.289 | 10.46    |
| 10.53    | 1091.008 | 10.37966 | 1141.78  | 10.40147 | 1146.162 | 10.38233 | 1128.845 | 10.4624  |
| 10.53207 | 1090.358 | 10.38099 | 1141.621 | 10.40278 | 1146.054 | 10.38448 | 1128.428 | 10.46462 |
| 10.53388 | 1089.793 | 10.38201 | 1141.499 | 10.40396 | 1145.956 | 10.38663 | 1128.007 | 10.46683 |
| 10.53535 | 1089.336 | 10.3838  | 1141.281 | 10.40514 | 1145.857 | 10.38879 | 1127.583 | 10.46905 |
| 10.53682 | 1088.88  | 10.3854  | 1141.083 | 10.40632 | 1145.757 | 10.39    | 1127.342 | 10.47032 |
| 10.53814 | 1088.47  | 10.38701 | 1140.882 | 10.40838 | 1145.58  | 10.39246 | 1126.851 | 10.47253 |
| 10.53946 | 1088.061 | 10.38861 | 1140.68  | 10.41    | 1145.438 | 10.39472 | 1126.393 | 10.47487 |
| 10.54138 | 1087.47  | 10.39    | 1140.503 | 10.41152 | 1145.303 | 10.39699 | 1125.929 | 10.4772  |
| 10.54323 | 1086.901 | 10.39183 | 1140.268 | 10.41289 | 1145.179 | 10.39925 | 1125.462 | 10.47953 |
| 10.54739 | 1085.628 | 10.39331 | 1140.076 | 10.41426 | 1145.053 | 10.40032 | 1125.24  | 10.48267 |
| 10.55    | 1084.833 | 10.39479 | 1139.881 | 10.41562 | 1144.926 | 10.40259 | 1124.768 | 10.48512 |
| 10.5515  | 1084.379 | 10.39627 | 1139.685 | 10.41801 | 1144.701 | 10.40497 | 1124.265 | 10.48757 |
| 10.55281 | 1083.982 | 10.4     | 1139.183 | 10.42    | 1144.511 | 10.40735 | 1123.756 | 10.49    |
| 10.55396 | 1083.634 | 10.40169 | 1138.952 | 10.4217  | 1144.345 | 10.40973 | 1123.243 | 10.4928  |
| 10.55598 | 1083.028 | 10.40326 | 1138.735 | 10.42321 | 1144.195 | 10.41272 | 1122.595 | 10.49538 |
| 10.55779 | 1082.484 | 10.40482 | 1138.515 | 10.42472 | 1144.043 | 10.41522 | 1122.044 | 10.49795 |
| 10.56    | 1081.824 | 10.40639 | 1138.294 | 10.42623 | 1143.89  | 10.41772 | 1121.488 | 10.5     |
| 10.56107 | 1081.504 | 10.41    | 1137.777 | 10.42887 | 1143.617 | 10.42    | 1120.975 | 10.50294 |
| 10.56278 | 1080.997 | 10.41179 | 1137.517 | 10.43    | 1143.499 | 10.42285 | 1120.332 | 10.50564 |

|          |          |          |          |          |          |          |          |          |
|----------|----------|----------|----------|----------|----------|----------|----------|----------|
| 10.56438 | 1080.522 | 10.41346 | 1137.271 | 10.43185 | 1143.303 | 10.42547 | 1119.731 | 10.50834 |
| 10.56579 | 1080.108 | 10.41512 | 1137.023 | 10.43349 | 1143.126 | 10.42809 | 1119.125 | 10.51    |
| 10.56719 | 1079.694 | 10.41679 | 1136.772 | 10.43496 | 1142.965 | 10.43    | 1118.68  | 10.51309 |
| 10.56859 | 1079.282 | 10.42    | 1136.285 | 10.43644 | 1142.802 | 10.43299 | 1117.979 | 10.51591 |
| 10.57    | 1078.869 | 10.42191 | 1135.992 | 10.43791 | 1142.637 | 10.43573 | 1117.327 | 10.51874 |
| 10.57177 | 1078.351 | 10.42368 | 1135.715 | 10.44    | 1142.402 | 10.43847 | 1116.668 | 10.52    |
| 10.57326 | 1077.917 | 10.42545 | 1135.436 | 10.44169 | 1142.209 | 10.44    | 1116.299 | 10.52323 |
| 10.57531 | 1077.321 | 10.42722 | 1135.153 | 10.44305 | 1142.051 | 10.44313 | 1115.538 | 10.52619 |
| 10.57662 | 1076.944 | 10.43    | 1134.707 | 10.44441 | 1141.891 | 10.44718 | 1114.535 | 10.52915 |
| 10.5789  | 1076.285 | 10.43203 | 1134.378 | 10.44578 | 1141.73  | 10.45    | 1113.838 | 10.53042 |
| 10.58    | 1075.968 | 10.4339  | 1134.068 | 10.45    | 1141.222 | 10.45223 | 1113.289 | 10.53338 |
| 10.58123 | 1075.615 | 10.43578 | 1133.756 | 10.45156 | 1141.031 | 10.45357 | 1112.961 | 10.53647 |
| 10.58282 | 1075.161 | 10.43766 | 1133.44  | 10.45301 | 1140.851 | 10.45474 | 1112.675 | 10.53956 |
| 10.5845  | 1074.681 | 10.44    | 1133.044 | 10.45445 | 1140.67  | 10.45679 | 1112.176 | 10.54353 |
| 10.58682 | 1074.023 | 10.44215 | 1132.677 | 10.4559  | 1140.486 | 10.45828 | 1111.816 | 10.54676 |
| 10.58829 | 1073.605 | 10.44414 | 1132.332 | 10.46    | 1139.958 | 10.45976 | 1111.457 | 10.54999 |
| 10.58976 | 1073.189 | 10.44613 | 1131.983 | 10.46165 | 1139.742 | 10.4617  | 1110.989 | 10.55369 |
| 10.59103 | 1072.834 | 10.44812 | 1131.631 | 10.4632  | 1139.537 | 10.46318 | 1110.632 | 10.55706 |
| 10.59275 | 1072.35  | 10.45    | 1131.295 | 10.46474 | 1139.33  | 10.46426 | 1110.375 | 10.56    |
| 10.59439 | 1071.893 | 10.45227 | 1130.888 | 10.46629 | 1139.12  | 10.46533 | 1110.118 | 10.56385 |
| 10.59582 | 1071.494 | 10.45438 | 1130.505 | 10.47    | 1138.611 | 10.4664  | 1109.862 | 10.56736 |
| 10.59725 | 1071.096 | 10.45648 | 1130.118 | 10.47177 | 1138.365 | 10.46993 | 1109.024 | 10.57    |
| 10.59975 | 1070.402 | 10.45858 | 1129.727 | 10.47341 | 1138.132 | 10.47165 | 1108.615 | 10.57401 |
| 10.60139 | 1069.948 | 10.46    | 1129.462 | 10.47506 | 1137.897 | 10.47312 | 1108.27  | 10.57768 |
| 10.60321 | 1069.449 | 10.4624  | 1129.01  | 10.47671 | 1137.659 | 10.4744  | 1107.969 | 10.58    |
| 10.60518 | 1068.909 | 10.46462 | 1128.587 | 10.48    | 1137.179 | 10.47664 | 1107.444 | 10.58419 |
| 10.6079  | 1068.169 | 10.46683 | 1128.16  | 10.48188 | 1136.901 | 10.47866 | 1106.974 | 10.58587 |
| 10.609   | 1067.868 | 10.46905 | 1127.728 | 10.48363 | 1136.639 | 10.48    | 1106.662 | 10.58732 |
| 10.61007 | 1067.578 | 10.47032 | 1127.481 | 10.48539 | 1136.373 | 10.48119 | 1106.386 | 10.59    |
| 10.61138 | 1067.226 | 10.47253 | 1127.046 | 10.48714 | 1136.106 | 10.48219 | 1106.154 | 10.59143 |
| 10.61295 | 1066.803 | 10.47487 | 1126.58  | 10.49    | 1135.664 | 10.48397 | 1105.745 | 10.59278 |
| 10.6157  | 1066.065 | 10.4772  | 1126.109 | 10.492   | 1135.352 | 10.48641 | 1105.186 | 10.59414 |
| 10.61845 | 1065.331 | 10.47953 | 1125.634 | 10.49386 | 1135.057 | 10.48796 | 1104.831 | 10.59549 |
| 10.62    | 1064.919 | 10.48267 | 1124.993 | 10.49572 | 1134.759 | 10.48951 | 1104.477 | 10.6     |
| 10.62138 | 1064.554 | 10.48512 | 1124.482 | 10.49758 | 1134.459 | 10.49052 | 1104.249 | 10.60155 |
| 10.62311 | 1064.098 | 10.48757 | 1123.966 | 10.5     | 1134.065 | 10.49194 | 1103.927 | 10.6029  |
| 10.62483 | 1063.647 | 10.49    | 1123.451 | 10.50213 | 1133.716 | 10.49357 | 1103.56  | 10.60402 |
| 10.62719 | 1063.03  | 10.4928  | 1122.853 | 10.50409 | 1133.387 | 10.49581 | 1103.056 | 10.60513 |
| 10.62869 | 1062.638 | 10.49538 | 1122.294 | 10.50606 | 1133.055 | 10.49724 | 1102.737 | 10.60624 |
| 10.63    | 1062.298 | 10.49795 | 1121.73  | 10.50803 | 1132.72  | 10.49866 | 1102.418 | 10.60995 |
| 10.63177 | 1061.839 | 10.5     | 1121.278 | 10.51    | 1132.383 | 10.5     | 1102.121 | 10.61097 |
| 10.63325 | 1061.458 | 10.50294 | 1120.626 | 10.51225 | 1131.994 | 10.50101 | 1101.897 | 10.6125  |
| 10.63528 | 1060.936 | 10.50518 | 1120.126 | 10.51433 | 1131.629 | 10.5027  | 1101.522 | 10.61461 |
| 10.63658 | 1060.605 | 10.50783 | 1119.539 | 10.51642 | 1131.26  | 10.50431 | 1101.168 | 10.61696 |
| 10.63787 | 1060.274 | 10.51    | 1119.059 | 10.5185  | 1130.887 | 10.50572 | 1100.859 | 10.61908 |
| 10.64    | 1059.734 | 10.51302 | 1118.393 | 10.52    | 1130.617 | 10.50713 | 1100.551 | 10.6203  |
| 10.64161 | 1059.326 | 10.51449 | 1118.07  | 10.52238 | 1130.186 | 10.50959 | 1100.014 | 10.6223  |

|          |          |          |          |          |          |          |          |          |
|----------|----------|----------|----------|----------|----------|----------|----------|----------|
| 10.64296 | 1058.986 | 10.51597 | 1117.748 | 10.52458 | 1129.782 | 10.51072 | 1099.769 | 10.62417 |
| 10.64482 | 1058.519 | 10.51744 | 1117.427 | 10.52678 | 1129.374 | 10.512   | 1099.492 | 10.62673 |
| 10.646   | 1058.223 | 10.52    | 1116.871 | 10.52897 | 1128.961 | 10.51312 | 1099.25  | 10.62837 |
| 10.64719 | 1057.927 | 10.52168 | 1116.506 | 10.53    | 1128.768 | 10.51501 | 1098.843 | 10.63    |
| 10.64925 | 1057.412 | 10.52316 | 1116.189 | 10.53251 | 1128.293 | 10.51762 | 1098.284 | 10.63109 |
| 10.6503  | 1057.154 | 10.52441 | 1115.918 | 10.53483 | 1127.847 | 10.51928 | 1097.931 | 10.63289 |
| 10.6516  | 1056.831 | 10.52567 | 1115.649 | 10.53715 | 1127.397 | 10.52057 | 1097.657 | 10.63461 |
| 10.65323 | 1056.431 | 10.52692 | 1115.38  | 10.53946 | 1126.943 | 10.52218 | 1097.318 | 10.6361  |
| 10.65469 | 1056.072 | 10.53    | 1114.724 | 10.54265 | 1126.314 | 10.52402 | 1096.93  | 10.6376  |
| 10.65598 | 1055.759 | 10.53144 | 1114.419 | 10.54508 | 1125.824 | 10.52655 | 1096.4   | 10.6391  |
| 10.65726 | 1055.446 | 10.53269 | 1114.153 | 10.54752 | 1125.33  | 10.52816 | 1096.064 | 10.64021 |
| 10.65854 | 1055.135 | 10.53375 | 1113.929 | 10.54996 | 1124.83  | 10.53    | 1095.682 | 10.64199 |
| 10.66    | 1054.781 | 10.53481 | 1113.705 | 10.55279 | 1124.249 | 10.53119 | 1095.437 | 10.64367 |
| 10.66168 | 1054.377 | 10.53587 | 1113.482 | 10.55535 | 1123.713 | 10.53225 | 1095.217 | 10.64599 |
| 10.66309 | 1054.037 | 10.54    | 1112.618 | 10.55791 | 1123.171 | 10.53332 | 1094.999 | 10.64746 |
| 10.66504 | 1053.571 | 10.54121 | 1112.365 | 10.56    | 1122.726 | 10.53438 | 1094.78  | 10.65    |
| 10.66628 | 1053.276 | 10.54227 | 1112.145 | 10.56293 | 1122.099 | 10.53625 | 1094.399 | 10.65107 |
| 10.66845 | 1052.761 | 10.54418 | 1111.75  | 10.56561 | 1121.514 | 10.53811 | 1094.019 | 10.653   |
| 10.67    | 1052.394 | 10.54971 | 1110.613 | 10.5683  | 1120.923 | 10.53998 | 1093.642 | 10.65564 |
| 10.67121 | 1052.111 | 10.55114 | 1110.321 | 10.57    | 1120.547 | 10.54133 | 1093.37  | 10.65732 |
| 10.67278 | 1051.743 | 10.55283 | 1109.977 | 10.57307 | 1119.864 | 10.54251 | 1093.132 | 10.659   |
| 10.67448 | 1051.344 | 10.55516 | 1109.505 | 10.57589 | 1119.227 | 10.54369 | 1092.896 | 10.66024 |
| 10.67683 | 1050.8   | 10.55664 | 1109.206 | 10.57871 | 1118.584 | 10.54487 | 1092.66  | 10.66223 |
| 10.67833 | 1050.454 | 10.55923 | 1108.684 | 10.58    | 1118.287 | 10.54694 | 1092.248 | 10.66412 |
| 10.67982 | 1050.111 | 10.56037 | 1108.456 | 10.58322 | 1117.544 | 10.54901 | 1091.838 | 10.66672 |
| 10.68105 | 1049.828 | 10.56147 | 1108.236 | 10.58617 | 1116.853 | 10.5503  | 1091.585 | 10.66838 |
| 10.68282 | 1049.424 | 10.5627  | 1107.992 | 10.58912 | 1116.154 | 10.55146 | 1091.358 | 10.67    |
| 10.6845  | 1049.043 | 10.56375 | 1107.782 | 10.59042 | 1115.844 | 10.55275 | 1091.105 | 10.67122 |
| 10.68597 | 1048.71  | 10.56481 | 1107.573 | 10.59337 | 1115.139 | 10.55391 | 1090.878 | 10.67232 |
| 10.68744 | 1048.379 | 10.56586 | 1107.364 | 10.59646 | 1114.39  | 10.55507 | 1090.652 | 10.67341 |
| 10.69    | 1047.806 | 10.56771 | 1107     | 10.59954 | 1113.633 | 10.55623 | 1090.427 | 10.67451 |
| 10.6911  | 1047.561 | 10.56956 | 1106.637 | 10.60353 | 1112.649 | 10.55827 | 1090.034 | 10.67643 |
| 10.69307 | 1047.123 | 10.57063 | 1106.426 | 10.60675 | 1111.839 | 10.56    | 1089.702 | 10.67835 |
| 10.69579 | 1046.525 | 10.57238 | 1106.084 | 10.60997 | 1111.02  | 10.56183 | 1089.353 | 10.68    |
| 10.69752 | 1046.146 | 10.57338 | 1105.889 | 10.61368 | 1110.073 | 10.56295 | 1089.14  | 10.68152 |
| 10.7     | 1045.605 | 10.57439 | 1105.694 | 10.61705 | 1109.199 | 10.56406 | 1088.927 | 10.68295 |
| 10.70124 | 1045.336 | 10.57539 | 1105.499 | 10.62    | 1108.426 | 10.56688 | 1088.396 | 10.6842  |
| 10.70235 | 1045.096 | 10.57715 | 1105.16  | 10.62166 | 1107.991 | 10.56969 | 1087.869 | 10.68528 |
| 10.70346 | 1044.858 | 10.5789  | 1104.821 | 10.62303 | 1107.63  | 10.57078 | 1087.665 | 10.68637 |
| 10.70458 | 1044.62  | 10.58    | 1104.61  | 10.6263  | 1106.775 | 10.57212 | 1087.416 | 10.68746 |
| 10.70652 | 1044.205 | 10.58127 | 1104.367 | 10.62893 | 1106.088 | 10.5733  | 1087.199 | 10.69    |
| 10.70846 | 1043.793 | 10.5824  | 1104.151 | 10.63    | 1105.811 | 10.57514 | 1086.859 | 10.69124 |
| 10.71    | 1043.468 | 10.58353 | 1103.935 | 10.63301 | 1105.029 | 10.57768 | 1086.395 | 10.69233 |
| 10.71138 | 1043.179 | 10.58467 | 1103.72  | 10.63449 | 1104.647 | 10.57929 | 1086.101 | 10.69423 |
| 10.7126  | 1042.923 | 10.58665 | 1103.344 | 10.63597 | 1104.265 | 10.58051 | 1085.881 | 10.69836 |
| 10.71383 | 1042.668 | 10.58863 | 1102.97  | 10.63745 | 1103.885 | 10.58185 | 1085.639 | 10.7     |
| 10.71499 | 1042.427 | 10.59    | 1102.713 | 10.64    | 1103.23  | 10.58338 | 1085.363 | 10.70149 |

|          |          |          |          |          |          |          |          |          |
|----------|----------|----------|----------|----------|----------|----------|----------|----------|
| 10.71665 | 1042.083 | 10.59139 | 1102.453 | 10.64169 | 1102.798 | 10.58549 | 1084.986 | 10.7033  |
| 10.71771 | 1041.865 | 10.59262 | 1102.224 | 10.64317 | 1102.421 | 10.58683 | 1084.748 | 10.70503 |
| 10.71877 | 1041.649 | 10.59372 | 1102.018 | 10.64446 | 1102.091 | 10.58817 | 1084.51  | 10.70741 |
| 10.72    | 1041.397 | 10.59483 | 1101.812 | 10.64576 | 1101.763 | 10.59    | 1084.187 | 10.70892 |
| 10.72121 | 1041.151 | 10.59594 | 1101.608 | 10.64706 | 1101.434 | 10.59163 | 1083.902 | 10.71    |
| 10.72225 | 1040.94  | 10.59787 | 1101.25  | 10.65    | 1100.69  | 10.59299 | 1083.664 | 10.71183 |
| 10.72329 | 1040.73  | 10.59981 | 1100.894 | 10.65148 | 1100.317 | 10.59486 | 1083.339 | 10.71336 |
| 10.72433 | 1040.521 | 10.60142 | 1100.599 | 10.65278 | 1099.992 | 10.59605 | 1083.133 | 10.71546 |
| 10.72796 | 1039.794 | 10.6027  | 1100.367 | 10.65388 | 1099.714 | 10.59724 | 1082.928 | 10.7168  |
| 10.73    | 1039.39  | 10.60397 | 1100.135 | 10.65499 | 1099.437 | 10.59932 | 1082.57  | 10.71814 |
| 10.73108 | 1039.178 | 10.60524 | 1099.904 | 10.6561  | 1099.161 | 10.60059 | 1082.355 | 10.72    |
| 10.73302 | 1038.798 | 10.60747 | 1099.501 | 10.66    | 1098.19  | 10.60159 | 1082.184 | 10.72172 |
| 10.73472 | 1038.467 | 10.60971 | 1099.1   | 10.66127 | 1097.876 | 10.6032  | 1081.913 | 10.72317 |
| 10.73619 | 1038.184 | 10.61078 | 1098.908 | 10.66237 | 1097.602 | 10.60463 | 1081.671 | 10.72516 |
| 10.73765 | 1037.901 | 10.61298 | 1098.516 | 10.66437 | 1097.11  | 10.60589 | 1081.46  | 10.72642 |
| 10.73912 | 1037.621 | 10.61438 | 1098.268 | 10.67    | 1095.729 | 10.60715 | 1081.25  | 10.72864 |
| 10.74021 | 1037.413 | 10.61578 | 1098.021 | 10.67114 | 1095.451 | 10.60841 | 1081.041 | 10.73    |
| 10.74168 | 1037.134 | 10.61823 | 1097.589 | 10.67287 | 1095.031 | 10.61    | 1080.777 | 10.73119 |
| 10.74314 | 1036.857 | 10.62    | 1097.278 | 10.67675 | 1094.09  | 10.61164 | 1080.507 | 10.73273 |
| 10.74446 | 1036.609 | 10.62171 | 1096.98  | 10.67977 | 1093.362 | 10.61303 | 1080.28  | 10.73436 |
| 10.74578 | 1036.363 | 10.62322 | 1096.718 | 10.68087 | 1093.099 | 10.61494 | 1079.969 | 10.7366  |
| 10.7471  | 1036.117 | 10.62458 | 1096.482 | 10.68239 | 1092.734 | 10.61615 | 1079.772 | 10.73803 |
| 10.75    | 1035.581 | 10.62595 | 1096.247 | 10.68373 | 1092.416 | 10.61828 | 1079.43  | 10.73945 |
| 10.75151 | 1035.305 | 10.62731 | 1096.013 | 10.68484 | 1092.151 | 10.62    | 1079.155 | 10.74049 |
| 10.75281 | 1035.068 | 10.62969 | 1095.606 | 10.68595 | 1091.887 | 10.62118 | 1078.966 | 10.74187 |
| 10.75411 | 1034.832 | 10.63085 | 1095.409 | 10.68706 | 1091.624 | 10.62272 | 1078.723 | 10.74345 |
| 10.75541 | 1034.597 | 10.63267 | 1095.1   | 10.689   | 1091.163 | 10.6244  | 1078.459 | 10.74562 |
| 10.75997 | 1033.785 | 10.63373 | 1094.92  | 10.69    | 1090.927 | 10.6267  | 1078.099 | 10.747   |
| 10.76134 | 1033.542 | 10.63491 | 1094.722 | 10.69133 | 1090.614 | 10.62817 | 1077.871 | 10.74942 |
| 10.76255 | 1033.331 | 10.63608 | 1094.524 | 10.6925  | 1090.339 | 10.62964 | 1077.644 | 10.75071 |
| 10.76376 | 1033.12  | 10.63726 | 1094.327 | 10.69355 | 1090.092 | 10.63103 | 1077.43  | 10.75198 |
| 10.76588 | 1032.754 | 10.64    | 1093.87  | 10.6946  | 1089.845 | 10.63278 | 1077.163 | 10.7531  |
| 10.76769 | 1032.443 | 10.64134 | 1093.647 | 10.69565 | 1089.599 | 10.63443 | 1076.913 | 10.755   |
| 10.76951 | 1032.134 | 10.64252 | 1093.453 | 10.6975  | 1089.169 | 10.63587 | 1076.695 | 10.75762 |
| 10.77208 | 1031.699 | 10.64357 | 1093.28  | 10.69934 | 1088.741 | 10.63732 | 1076.478 | 10.75928 |
| 10.77389 | 1031.395 | 10.64462 | 1093.107 | 10.70065 | 1088.436 | 10.63985 | 1076.101 | 10.76058 |
| 10.77553 | 1031.124 | 10.64567 | 1092.935 | 10.70251 | 1088.006 | 10.64143 | 1075.868 | 10.76221 |
| 10.77716 | 1030.855 | 10.64876 | 1092.432 | 10.70369 | 1087.733 | 10.64329 | 1075.594 | 10.76407 |
| 10.7788  | 1030.588 | 10.65    | 1092.23  | 10.70488 | 1087.46  | 10.64431 | 1075.445 | 10.76664 |
| 10.78    | 1030.392 | 10.65148 | 1091.992 | 10.70695 | 1086.984 | 10.64534 | 1075.296 | 10.76827 |
| 10.78187 | 1030.089 | 10.65329 | 1091.701 | 10.70902 | 1086.51  | 10.64636 | 1075.148 | 10.77    |
| 10.78345 | 1029.836 | 10.65503 | 1091.423 | 10.7103  | 1086.219 | 10.64815 | 1074.891 | 10.77121 |
| 10.78503 | 1029.585 | 10.65742 | 1091.043 | 10.71145 | 1085.958 | 10.64995 | 1074.634 | 10.77231 |
| 10.7866  | 1029.336 | 10.65894 | 1090.801 | 10.71273 | 1085.667 | 10.65126 | 1074.448 | 10.7734  |
| 10.79    | 1028.806 | 10.66    | 1090.635 | 10.71388 | 1085.406 | 10.65238 | 1074.29  | 10.77449 |
| 10.7918  | 1028.527 | 10.66182 | 1090.348 | 10.71503 | 1085.146 | 10.65339 | 1074.148 | 10.7764  |
| 10.79347 | 1028.273 | 10.66335 | 1090.11  | 10.71618 | 1084.886 | 10.65439 | 1074.007 | 10.77831 |

|          |          |          |          |          |          |          |          |          |
|----------|----------|----------|----------|----------|----------|----------|----------|----------|
| 10.79513 | 1028.022 | 10.66544 | 1089.785 | 10.7182  | 1084.432 | 10.6554  | 1073.867 | 10.78    |
| 10.79679 | 1027.772 | 10.66678 | 1089.578 | 10.72    | 1084.028 | 10.65716 | 1073.623 | 10.78137 |
| 10.8     | 1027.295 | 10.66811 | 1089.373 | 10.72148 | 1083.698 | 10.65893 | 1073.38  | 10.78259 |
| 10.8019  | 1027.016 | 10.67    | 1089.083 | 10.7228  | 1083.403 | 10.66    | 1073.233 | 10.78381 |
| 10.80366 | 1026.762 | 10.6717  | 1088.824 | 10.72412 | 1083.109 | 10.66131 | 1073.054 | 10.78503 |
| 10.80541 | 1026.51  | 10.67312 | 1088.607 | 10.72544 | 1082.816 | 10.66249 | 1072.895 | 10.78717 |
| 10.80717 | 1026.26  | 10.67509 | 1088.31  | 10.72775 | 1082.304 | 10.66368 | 1072.736 | 10.78931 |
| 10.81    | 1025.862 | 10.67634 | 1088.122 | 10.73    | 1081.809 | 10.66486 | 1072.578 | 10.79074 |
| 10.81201 | 1025.583 | 10.67852 | 1087.795 | 10.73163 | 1081.452 | 10.66693 | 1072.303 | 10.79285 |
| 10.81386 | 1025.329 | 10.68    | 1087.575 | 10.73308 | 1081.135 | 10.66899 | 1072.03  | 10.79419 |
| 10.81571 | 1025.079 | 10.68118 | 1087.401 | 10.73438 | 1080.851 | 10.67    | 1071.898 | 10.79554 |
| 10.81757 | 1024.831 | 10.68269 | 1087.178 | 10.73568 | 1080.567 | 10.67148 | 1071.706 | 10.79788 |
| 10.82    | 1024.508 | 10.68428 | 1086.943 | 10.73674 | 1080.338 | 10.67281 | 1071.535 | 10.8     |
| 10.82212 | 1024.23  | 10.68648 | 1086.623 | 10.73783 | 1080.101 | 10.67413 | 1071.366 | 10.80165 |
| 10.82407 | 1023.98  | 10.68788 | 1086.419 | 10.73893 | 1079.864 | 10.67545 | 1071.197 | 10.80311 |
| 10.82602 | 1023.732 | 10.68928 | 1086.217 | 10.74    | 1079.632 | 10.67777 | 1070.905 | 10.80442 |
| 10.82797 | 1023.488 | 10.69048 | 1086.044 | 10.74125 | 1079.362 | 10.68    | 1070.625 | 10.80574 |
| 10.83    | 1023.235 | 10.69183 | 1085.85  | 10.7423  | 1079.137 | 10.68163 | 1070.422 | 10.80706 |
| 10.83223 | 1022.961 | 10.69339 | 1085.628 | 10.74335 | 1078.911 | 10.68309 | 1070.244 | 10.80936 |
| 10.83428 | 1022.715 | 10.69552 | 1085.326 | 10.74441 | 1078.686 | 10.68439 | 1070.085 | 10.81083 |
| 10.83632 | 1022.473 | 10.69687 | 1085.134 | 10.74808 | 1077.902 | 10.6857  | 1069.927 | 10.81322 |
| 10.83837 | 1022.234 | 10.69925 | 1084.801 | 10.75    | 1077.495 | 10.687   | 1069.77  | 10.81475 |
| 10.84    | 1022.045 | 10.70034 | 1084.649 | 10.75175 | 1077.126 | 10.68929 | 1069.497 | 10.81627 |
| 10.84234 | 1021.777 | 10.70195 | 1084.425 | 10.75389 | 1076.675 | 10.69033 | 1069.374 | 10.81894 |
| 10.84449 | 1021.538 | 10.70305 | 1084.273 | 10.75491 | 1076.461 | 10.69169 | 1069.214 | 10.82    |
| 10.84663 | 1021.303 | 10.70493 | 1084.015 | 10.75594 | 1076.247 | 10.69321 | 1069.037 | 10.82189 |
| 10.84878 | 1021.072 | 10.70751 | 1083.663 | 10.75696 | 1076.033 | 10.69473 | 1068.861 | 10.82358 |
| 10.85    | 1020.941 | 10.70915 | 1083.44  | 10.75875 | 1075.661 | 10.69625 | 1068.687 | 10.82526 |
| 10.85245 | 1020.682 | 10.71023 | 1083.294 | 10.76    | 1075.4   | 10.69891 | 1068.385 | 10.82695 |
| 10.8547  | 1020.451 | 10.71218 | 1083.033 | 10.76114 | 1075.165 | 10.7     | 1068.263 | 10.82989 |
| 10.85695 | 1020.225 | 10.71402 | 1082.788 | 10.763   | 1074.78  | 10.70189 | 1068.053 | 10.83102 |
| 10.85919 | 1020.004 | 10.71656 | 1082.452 | 10.76476 | 1074.417 | 10.70357 | 1067.868 | 10.83206 |
| 10.86032 | 1019.894 | 10.71818 | 1082.24  | 10.76631 | 1074.101 | 10.70525 | 1067.685 | 10.83388 |
| 10.86257 | 1019.676 | 10.72    | 1082.002 | 10.76785 | 1073.785 | 10.70693 | 1067.504 | 10.83552 |
| 10.86492 | 1019.457 | 10.7212  | 1081.846 | 10.76939 | 1073.47  | 10.70988 | 1067.191 | 10.83716 |
| 10.86726 | 1019.243 | 10.72229 | 1081.706 | 10.77051 | 1073.242 | 10.71102 | 1067.071 | 10.83881 |
| 10.86961 | 1019.034 | 10.72337 | 1081.567 | 10.77191 | 1072.958 | 10.71206 | 1066.962 | 10.84    |
| 10.87268 | 1018.764 | 10.72445 | 1081.428 | 10.77352 | 1072.634 | 10.71388 | 1066.774 | 10.84188 |
| 10.87513 | 1018.559 | 10.72635 | 1081.186 | 10.77572 | 1072.19  | 10.71496 | 1066.663 | 10.84338 |
| 10.87758 | 1018.359 | 10.72824 | 1080.946 | 10.77712 | 1071.908 | 10.71613 | 1066.544 | 10.84489 |
| 10.88    | 1018.167 | 10.73    | 1080.725 | 10.77853 | 1071.628 | 10.71725 | 1066.431 | 10.8464  |
| 10.8828  | 1017.949 | 10.73136 | 1080.555 | 10.78    | 1071.334 | 10.71899 | 1066.256 | 10.85    |
| 10.88535 | 1017.76  | 10.73258 | 1080.404 | 10.78183 | 1070.969 | 10.72    | 1066.156 | 10.85172 |
| 10.8879  | 1017.577 | 10.73379 | 1080.253 | 10.78338 | 1070.663 | 10.72111 | 1066.047 | 10.85331 |
| 10.89    | 1017.431 | 10.73501 | 1080.104 | 10.78551 | 1070.243 | 10.72257 | 1065.904 | 10.8549  |
| 10.89292 | 1017.232 | 10.73713 | 1079.844 | 10.78687 | 1069.976 | 10.72403 | 1065.763 | 10.85649 |
| 10.89557 | 1017.062 | 10.73926 | 1079.585 | 10.78924 | 1069.512 | 10.72549 | 1065.623 | 10.86    |

|          |          |          |          |          |          |          |          |          |
|----------|----------|----------|----------|----------|----------|----------|----------|----------|
| 10.89822 | 1016.9   | 10.7403  | 1079.459 | 10.79034 | 1069.298 | 10.73    | 1065.2   | 10.86182 |
| 10.9     | 1016.794 | 10.74151 | 1079.315 | 10.7919  | 1068.995 | 10.73167 | 1065.046 | 10.8635  |
| 10.90303 | 1016.618 | 10.74285 | 1079.155 | 10.79296 | 1068.789 | 10.73326 | 1064.903 | 10.86519 |
| 10.90579 | 1016.47  | 10.74418 | 1078.996 | 10.79473 | 1068.446 | 10.73484 | 1064.761 | 10.86687 |
| 10.90854 | 1016.331 | 10.74552 | 1078.838 | 10.79718 | 1067.976 | 10.73643 | 1064.621 | 10.87    |
| 10.91    | 1016.259 | 10.74787 | 1078.563 | 10.79874 | 1067.677 | 10.74    | 1064.311 | 10.87193 |
| 10.91315 | 1016.109 | 10.75    | 1078.315 | 10.8     | 1067.436 | 10.74181 | 1064.157 | 10.87371 |
| 10.91601 | 1015.987 | 10.75165 | 1078.125 | 10.80108 | 1067.23  | 10.7435  | 1064.016 | 10.8755  |
| 10.91886 | 1015.874 | 10.75311 | 1077.958 | 10.8029  | 1066.885 | 10.74518 | 1063.878 | 10.87728 |
| 10.92    | 1015.831 | 10.75443 | 1077.809 | 10.80462 | 1066.56  | 10.74687 | 1063.741 | 10.88    |
| 10.92326 | 1015.711 | 10.75574 | 1077.66  | 10.80613 | 1066.276 | 10.75    | 1063.491 | 10.88204 |
| 10.92622 | 1015.618 | 10.75706 | 1077.512 | 10.80764 | 1065.992 | 10.75193 | 1063.34  | 10.88393 |
| 10.92918 | 1015.535 | 10.75936 | 1077.255 | 10.81    | 1065.551 | 10.75371 | 1063.204 | 10.88581 |
| 10.93042 | 1015.501 | 10.76083 | 1077.092 | 10.81111 | 1065.344 | 10.75549 | 1063.071 | 10.8877  |
| 10.93338 | 1015.426 | 10.76323 | 1076.829 | 10.81311 | 1064.974 | 10.75728 | 1062.939 | 10.89    |
| 10.93643 | 1015.366 | 10.76476 | 1076.663 | 10.81585 | 1064.468 | 10.76    | 1062.742 | 10.89216 |
| 10.93949 | 1015.317 | 10.76629 | 1076.498 | 10.8176  | 1064.148 | 10.76204 | 1062.596 | 10.89414 |
| 10.94349 | 1015.26  | 10.76897 | 1076.211 | 10.82    | 1063.71  | 10.76392 | 1062.467 | 10.89613 |
| 10.94664 | 1015.236 | 10.77    | 1076.102 | 10.82125 | 1063.483 | 10.76581 | 1062.339 | 10.89812 |
| 10.94978 | 1015.224 | 10.7719  | 1075.902 | 10.82236 | 1063.282 | 10.76769 | 1062.215 | 10.9     |
| 10.9536  | 1015.218 | 10.7736  | 1075.726 | 10.82347 | 1063.081 | 10.77    | 1062.064 | 10.90227 |
| 10.95683 | 1015.234 | 10.77529 | 1075.551 | 10.82458 | 1062.881 | 10.77215 | 1061.927 | 10.90436 |
| 10.96    | 1015.262 | 10.77698 | 1075.378 | 10.82653 | 1062.532 | 10.77414 | 1061.805 | 10.90646 |
| 10.9637  | 1015.303 | 10.77995 | 1075.077 | 10.82847 | 1062.184 | 10.77612 | 1061.686 | 10.90855 |
| 10.96702 | 1015.362 | 10.78102 | 1074.969 | 10.83    | 1061.912 | 10.77811 | 1061.57  | 10.91    |
| 10.97    | 1015.428 | 10.78207 | 1074.864 | 10.83137 | 1061.668 | 10.78    | 1061.461 | 10.91239 |
| 10.97379 | 1015.519 | 10.78391 | 1074.682 | 10.83259 | 1061.453 | 10.78227 | 1061.333 | 10.91459 |
| 10.97718 | 1015.626 | 10.78557 | 1074.52  | 10.83381 | 1061.238 | 10.78435 | 1061.221 | 10.91679 |
| 10.98    | 1015.726 | 10.78722 | 1074.36  | 10.83503 | 1061.024 | 10.78644 | 1061.112 | 10.91898 |
| 10.98388 | 1015.872 | 10.78887 | 1074.2   | 10.83717 | 1060.65  | 10.78853 | 1061.007 | 10.92    |
| 10.98733 | 1016.03  | 10.79    | 1074.092 | 10.83931 | 1060.279 | 10.79    | 1060.934 | 10.92251 |
| 10.99    | 1016.162 | 10.79189 | 1073.912 | 10.84074 | 1060.03  | 10.79238 | 1060.818 | 10.92482 |
| 10.99395 | 1016.367 | 10.79341 | 1073.769 | 10.84283 | 1059.669 | 10.79458 | 1060.718 | 10.92712 |
| 10.99746 | 1016.578 | 10.79494 | 1073.627 | 10.84403 | 1059.464 | 10.79677 | 1060.621 | 10.92942 |
| 11       | 1016.741 | 10.79646 | 1073.487 | 10.84523 | 1059.259 | 10.79896 | 1060.528 | 10.93263 |
| 11.00401 | 1017.008 | 10.8     | 1073.164 | 10.84643 | 1059.054 | 10.8     | 1060.485 | 10.93505 |
| 11.00756 | 1017.276 | 10.80174 | 1073.007 | 10.84853 | 1058.698 | 10.8025  | 1060.383 | 10.93746 |
| 11.01    | 1017.469 | 10.80335 | 1072.864 | 10.85    | 1058.449 | 10.8048  | 1060.297 | 10.93987 |
| 11.01406 | 1017.801 | 10.80496 | 1072.723 | 10.85155 | 1058.188 | 10.80709 | 1060.215 | 10.94276 |
| 11.01568 | 1017.944 | 10.80657 | 1072.583 | 10.85295 | 1057.954 | 10.80939 | 1060.137 | 10.94528 |
| 11.01731 | 1018.09  | 10.81    | 1072.288 | 10.85435 | 1057.721 | 10.81262 | 1060.031 | 10.9478  |
| 11.01841 | 1018.191 | 10.81184 | 1072.132 | 10.85575 | 1057.488 | 10.81502 | 1059.961 | 10.95    |
| 11.0198  | 1018.32  | 10.81355 | 1071.99  | 10.85819 | 1057.083 | 10.81742 | 1059.896 | 10.95288 |
| 11.02096 | 1018.429 | 10.81526 | 1071.849 | 10.86    | 1056.785 | 10.81982 | 1059.836 | 10.95552 |
| 11.02233 | 1018.56  | 10.81697 | 1071.71  | 10.86174 | 1056.5   | 10.82274 | 1059.765 | 10.95815 |
| 11.02351 | 1018.674 | 10.82    | 1071.466 | 10.86329 | 1056.248 | 10.82525 | 1059.714 | 10.96    |
| 11.02459 | 1018.78  | 10.82195 | 1071.312 | 10.86484 | 1055.996 | 10.82776 | 1059.668 | 10.96301 |



|          |          |          |          |          |          |          |          |          |
|----------|----------|----------|----------|----------|----------|----------|----------|----------|
| 11.02638 | 1018.959 | 10.82377 | 1071.171 | 10.86639 | 1055.746 | 10.83    | 1059.631 | 10.96575 |
| 11.02907 | 1019.236 | 10.82558 | 1071.032 | 10.86911 | 1055.31  | 10.83286 | 1059.587 | 10.9685  |
| 11.03026 | 1019.361 | 10.82739 | 1070.895 | 10.87039 | 1055.105 | 10.83548 | 1059.557 | 10.97    |
| 11.03137 | 1019.479 | 10.83    | 1070.7   | 10.8719  | 1054.864 | 10.83809 | 1059.533 | 10.97314 |
| 11.03261 | 1019.614 | 10.83207 | 1070.547 | 10.87359 | 1054.597 | 10.84    | 1059.519 | 10.976   |
| 11.03372 | 1019.736 | 10.83399 | 1070.409 | 10.87511 | 1054.358 | 10.84299 | 1059.5   | 10.97885 |
| 11.03484 | 1019.859 | 10.83591 | 1070.273 | 10.87663 | 1054.12  | 10.84571 | 1059.494 | 10.98    |
| 11.03584 | 1019.972 | 10.83783 | 1070.139 | 10.87815 | 1053.883 | 10.84843 | 1059.495 | 10.98327 |
| 11.03764 | 1020.178 | 10.84    | 1069.989 | 10.88    | 1053.595 | 10.85    | 1059.498 | 10.98624 |
| 11.04    | 1020.451 | 10.84219 | 1069.84  | 10.88174 | 1053.326 | 10.85311 | 1059.507 | 10.98921 |
| 11.04103 | 1020.573 | 10.84422 | 1069.706 | 10.88314 | 1053.11  | 10.85593 | 1059.528 | 10.99042 |
| 11.04272 | 1020.776 | 10.84624 | 1069.575 | 10.88455 | 1052.895 | 10.85876 | 1059.556 | 10.99339 |
| 11.04377 | 1020.904 | 10.84827 | 1069.446 | 10.88596 | 1052.68  | 10.86    | 1059.571 | 10.99648 |
| 11.04482 | 1021.033 | 10.85    | 1069.336 | 10.89    | 1052.069 | 10.86323 | 1059.611 | 10.99956 |
| 11.04587 | 1021.164 | 10.85232 | 1069.192 | 10.89161 | 1051.827 | 10.86616 | 1059.662 | 11.00352 |
| 11.04772 | 1021.396 | 10.85445 | 1069.064 | 10.8931  | 1051.605 | 10.86909 | 1059.722 | 11.00672 |
| 11.04956 | 1021.632 | 10.85658 | 1068.938 | 10.89459 | 1051.384 | 10.87042 | 1059.75  | 11.00991 |
| 11.05192 | 1021.942 | 10.85872 | 1068.815 | 10.89608 | 1051.163 | 10.87335 | 1059.817 | 11.01365 |
| 11.05358 | 1022.164 | 10.86    | 1068.742 | 10.9     | 1050.589 | 10.87639 | 1059.901 | 11.01696 |
| 11.05938 | 1022.984 | 10.86244 | 1068.605 | 10.9017  | 1050.341 | 10.87942 | 1059.995 | 11.02    |
| 11.06083 | 1023.192 | 10.86468 | 1068.484 | 10.9033  | 1050.112 | 10.88043 | 1060.027 | 11.02378 |
| 11.0623  | 1023.405 | 10.86693 | 1068.365 | 10.90489 | 1049.884 | 10.88347 | 1060.128 | 11.02719 |
| 11.06346 | 1023.574 | 10.86917 | 1068.25  | 10.90648 | 1049.657 | 10.88661 | 1060.248 | 11.03    |
| 11.06524 | 1023.837 | 10.87032 | 1068.192 | 10.91    | 1049.158 | 10.88974 | 1060.38  | 11.0339  |
| 11.06637 | 1024.004 | 10.87257 | 1068.079 | 10.91182 | 1048.902 | 10.89359 | 1060.547 | 11.03742 |
| 11.06737 | 1024.156 | 10.87492 | 1067.967 | 10.91351 | 1048.666 | 10.89682 | 1060.708 | 11.04    |
| 11.0686  | 1024.34  | 10.87728 | 1067.857 | 10.9152  | 1048.432 | 10.9     | 1060.877 | 11.04402 |
| 11.07    | 1024.553 | 10.87964 | 1067.752 | 10.9169  | 1048.199 | 10.9037  | 1061.081 | 11.04764 |
| 11.07122 | 1024.739 | 10.88269 | 1067.617 | 10.92    | 1047.775 | 10.90702 | 1061.284 | 11.05    |
| 11.0724  | 1024.92  | 10.88516 | 1067.515 | 10.92194 | 1047.512 | 10.91    | 1061.477 | 11.05414 |
| 11.07413 | 1025.189 | 10.88764 | 1067.417 | 10.92373 | 1047.271 | 10.9138  | 1061.73  | 11.05786 |
| 11.07574 | 1025.44  | 10.89    | 1067.326 | 10.92553 | 1047.031 | 10.91721 | 1061.98  | 11.06    |
| 11.07843 | 1025.864 | 10.89282 | 1067.22  | 10.92733 | 1046.793 | 10.92    | 1062.195 | 11.06425 |
| 11.08    | 1026.114 | 10.89541 | 1067.13  | 10.93    | 1046.441 | 10.9239  | 1062.501 | 11.07    |
| 11.0814  | 1026.339 | 10.898   | 1067.044 | 10.93205 | 1046.172 | 10.92738 | 1062.801 | 11.07425 |
| 11.0828  | 1026.564 | 10.9     | 1066.981 | 10.93396 | 1045.926 | 10.93    | 1063.034 | 11.08    |
| 11.08405 | 1026.768 | 10.90296 | 1066.889 | 10.93586 | 1045.682 | 10.93398 | 1063.398 | 11.08425 |
| 11.08515 | 1026.947 | 10.90566 | 1066.814 | 10.93777 | 1045.44  | 10.93754 | 1063.75  | 11.09    |
| 11.08624 | 1027.127 | 10.90836 | 1066.743 | 10.94    | 1045.157 | 10.94    | 1064.001 | 11.09425 |
| 11.08734 | 1027.308 | 10.91    | 1066.702 | 10.94218 | 1044.884 | 10.94406 | 1064.425 | 11.1     |
| 11.08926 | 1027.626 | 10.91309 | 1066.627 | 10.94419 | 1044.634 | 10.94767 | 1064.831 | 11.10425 |
| 11.09027 | 1027.796 | 10.91591 | 1066.568 | 10.9462  | 1044.387 | 10.95    | 1065.101 | 11.10931 |
| 11.09157 | 1028.014 | 10.91873 | 1066.514 | 10.94821 | 1044.142 | 10.95412 | 1065.587 | 11.11069 |
| 11.09324 | 1028.297 | 10.92    | 1066.491 | 10.95    | 1043.925 | 10.95777 | 1066.048 | 11.11295 |
| 11.09483 | 1028.568 | 10.92322 | 1066.436 | 10.9523  | 1043.647 | 10.96    | 1066.338 | 11.11414 |
| 11.09622 | 1028.807 | 10.92616 | 1066.395 | 10.95442 | 1043.395 | 10.96416 | 1066.889 | 11.11534 |
| 11.09761 | 1029.046 | 10.9291  | 1066.361 | 10.95654 | 1043.146 | 10.96969 | 1067.683 | 11.11654 |

|          |          |          |          |          |          |          |          |          |
|----------|----------|----------|----------|----------|----------|----------|----------|----------|
| 11.1     | 1029.463 | 10.93042 | 1066.346 | 10.95867 | 1042.898 | 10.97095 | 1067.866 | 11.11761 |
| 11.10159 | 1029.742 | 10.93336 | 1066.317 | 10.96    | 1042.744 | 10.97216 | 1068.044 | 11.11955 |
| 11.10434 | 1030.233 | 10.93642 | 1066.298 | 10.96243 | 1042.464 | 10.9736  | 1068.257 | 11.12068 |
| 11.10709 | 1030.73  | 10.93948 | 1066.285 | 10.96466 | 1042.211 | 10.97489 | 1068.449 | 11.12189 |
| 11.10957 | 1031.182 | 10.9435  | 1066.274 | 10.9669  | 1041.96  | 10.97602 | 1068.619 | 11.12355 |
| 11.11258 | 1031.738 | 10.94667 | 1066.279 | 10.96913 | 1041.712 | 10.97747 | 1068.839 | 11.12461 |
| 11.11422 | 1032.042 | 10.94985 | 1066.291 | 10.97032 | 1041.58  | 10.97896 | 1069.068 | 11.12646 |
| 11.11585 | 1032.348 | 10.95363 | 1066.31  | 10.97255 | 1041.335 | 10.98    | 1069.23  | 11.12746 |
| 11.11748 | 1032.656 | 10.95693 | 1066.34  | 10.9749  | 1041.081 | 10.98159 | 1069.479 | 11.12872 |
| 11.12    | 1033.135 | 10.96    | 1066.376 | 10.97725 | 1040.831 | 10.98334 | 1069.757 | 11.13    |
| 11.12187 | 1033.492 | 10.96377 | 1066.425 | 10.9796  | 1040.583 | 10.98442 | 1069.931 | 11.13159 |
| 11.12383 | 1033.873 | 10.96718 | 1066.485 | 10.98269 | 1040.261 | 10.9855  | 1070.105 | 11.13287 |
| 11.12579 | 1034.257 | 10.97    | 1066.541 | 10.98515 | 1040.009 | 10.98763 | 1070.451 | 11.1343  |
| 11.13    | 1035.094 | 10.9739  | 1066.623 | 10.98762 | 1039.76  | 10.98975 | 1070.802 | 11.13573 |
| 11.13224 | 1035.542 | 10.97743 | 1066.715 | 10.99    | 1039.522 | 10.99116 | 1071.039 | 11.13823 |
| 11.13861 | 1036.853 | 10.98    | 1066.788 | 10.99282 | 1039.243 | 10.99267 | 1071.294 | 11.14    |
| 11.14    | 1037.142 | 10.98403 | 1066.907 | 10.9954  | 1038.994 | 10.99436 | 1071.584 | 11.14165 |
| 11.14727 | 1038.667 | 10.98768 | 1067.034 | 10.99799 | 1038.748 | 10.99668 | 1071.986 | 11.14309 |
| 11.15    | 1039.255 | 10.99    | 1067.12  | 11       | 1038.559 | 10.99816 | 1072.245 | 11.14439 |
| 11.15315 | 1039.938 | 10.99416 | 1067.28  | 11.00295 | 1038.283 | 11       | 1072.571 | 11.14569 |
| 11.15452 | 1040.127 | 11       | 1067.548 | 11.00566 | 1038.038 | 11.00169 | 1072.873 | 11.14796 |
| 11.15636 | 1040.114 | 11.00416 | 1067.746 | 11.00837 | 1037.797 | 11.00317 | 1073.142 | 11.15    |
| 11.15754 | 1040.086 | 11.01    | 1068.069 | 11.01    | 1037.652 | 11.0044  | 1073.368 | 11.15106 |
| 11.15959 | 1040.12  | 11.01416 | 1068.306 | 11.01309 | 1037.382 | 11.0063  | 1073.721 | 11.15222 |
| 11.16235 | 1040.219 | 11.02    | 1068.685 | 11.01592 | 1037.142 | 11.0082  | 1074.078 | 11.15325 |
| 11.16697 | 1040.402 | 11.02416 | 1068.963 | 11.01875 | 1036.907 | 11.01    | 1074.419 | 11.15499 |
| 11.17    | 1040.506 | 11.03    | 1069.4   | 11.02    | 1036.804 | 11.01217 | 1074.835 | 11.15641 |
| 11.17529 | 1040.689 | 11.03416 | 1069.72  | 11.02323 | 1036.541 | 11.01483 | 1075.355 | 11.1576  |
| 11.18    | 1040.869 | 11.04    | 1070.219 | 11.02618 | 1036.309 | 11.01749 | 1075.884 | 11.15864 |
| 11.18529 | 1041.074 | 11.04416 | 1070.582 | 11.02914 | 1036.082 | 11.02    | 1076.39  | 11.15968 |
| 11.19    | 1041.262 | 11.05    | 1071.144 | 11.03042 | 1035.985 | 11.02304 | 1077.008 | 11.16068 |
| 11.19529 | 1041.476 | 11.05416 | 1071.553 | 11.03337 | 1035.762 | 11.02568 | 1077.561 | 11.16213 |
| 11.2     | 1041.678 | 11.06    | 1072.18  | 11.03645 | 1035.54  | 11.0268  | 1077.795 | 11.16395 |
| 11.20529 | 1041.907 | 11.06383 | 1072.599 | 11.03953 | 1035.323 | 11.02823 | 1078.097 | 11.16515 |
| 11.21    | 1042.12  | 11.06491 | 1072.72  | 11.04352 | 1035.047 | 11.02935 | 1078.336 | 11.16618 |
| 11.21529 | 1042.362 | 11.06692 | 1072.95  | 11.04672 | 1034.837 | 11.03038 | 1078.556 | 11.1679  |
| 11.22    | 1042.587 | 11.06799 | 1073.073 | 11.04993 | 1034.633 | 11.03233 | 1078.974 | 11.16936 |
| 11.22529 | 1042.842 | 11.06905 | 1073.197 | 11.05366 | 1034.398 | 11.03419 | 1079.376 | 11.17076 |
| 11.23    | 1043.079 | 11.07015 | 1073.325 | 11.05699 | 1034.202 | 11.03524 | 1079.603 | 11.1718  |
| 11.23529 | 1043.347 | 11.07139 | 1073.472 | 11.06    | 1034.03  | 11.03628 | 1079.831 | 11.17414 |
| 11.24    | 1043.597 | 11.07269 | 1073.627 | 11.06381 | 1033.817 | 11.03796 | 1080.199 | 11.17577 |
| 11.24529 | 1043.879 | 11.07449 | 1073.843 | 11.06726 | 1033.636 | 11.03941 | 1080.518 | 11.1774  |
| 11.24873 | 1044.069 | 11.07563 | 1073.983 | 11.07    | 1033.498 | 11.04084 | 1080.833 | 11.18    |
| 11.24983 | 1044.129 | 11.07701 | 1074.153 | 11.07395 | 1033.304 | 11.0422  | 1081.136 | 11.18172 |
| 11.25133 | 1044.213 | 11.0784  | 1074.325 | 11.07754 | 1033.142 | 11.04345 | 1081.417 | 11.18314 |
| 11.25537 | 1044.442 | 11.07978 | 1074.499 | 11.08    | 1033.035 | 11.04583 | 1081.95  | 11.18508 |
| 11.26    | 1044.71  | 11.08158 | 1074.728 | 11.0841  | 1032.862 | 11.0477  | 1082.376 | 11.18631 |

|          |          |          |          |          |          |          |          |          |
|----------|----------|----------|----------|----------|----------|----------|----------|----------|
| 11.26462 | 1044.98  | 11.08303 | 1074.914 | 11.08782 | 1032.721 | 11.04958 | 1082.804 | 11.18848 |
| 11.26854 | 1045.216 | 11.08439 | 1075.09  | 11.09    | 1032.643 | 11.05099 | 1083.127 | 11.19    |
| 11.27    | 1045.304 | 11.08557 | 1075.246 | 11.09425 | 1032.494 | 11.05226 | 1083.42  | 11.19226 |
| 11.27395 | 1045.546 | 11.08676 | 1075.402 | 11.1     | 1032.328 | 11.05362 | 1083.734 | 11.1942  |
| 11.28    | 1045.927 | 11.08883 | 1075.679 | 11.10425 | 1032.211 | 11.05549 | 1084.168 | 11.19592 |
| 11.28388 | 1046.173 | 11.09    | 1075.836 | 11.11    | 1032.089 | 11.05668 | 1084.446 | 11.19768 |
| 11.29    | 1046.575 | 11.09216 | 1076.133 | 11.11425 | 1032.005 | 11.05876 | 1084.934 | 11.19945 |
| 11.29388 | 1046.831 | 11.09366 | 1076.341 | 11.12    | 1031.928 | 11.06    | 1085.228 | 11.20202 |
| 11.3     | 1047.248 | 11.09516 | 1076.551 | 11.12425 | 1031.878 | 11.0615  | 1085.585 | 11.20379 |
| 11.30388 | 1047.515 | 11.09666 | 1076.763 | 11.13    | 1031.848 | 11.06285 | 1085.906 | 11.20534 |
| 11.31    | 1047.948 | 11.1     | 1077.242 | 11.13425 | 1031.832 | 11.06419 | 1086.229 | 11.20688 |
| 11.31388 | 1048.224 | 11.10171 | 1077.491 | 11.14    | 1031.85  | 11.06654 | 1086.798 | 11.20843 |
| 11.32    | 1048.674 | 11.1048  | 1077.95  | 11.14425 | 1031.87  | 11.06889 | 1087.371 | 11.21    |
| 11.32388 | 1048.96  | 11.10788 | 1078.419 | 11.15    | 1031.938 | 11.07    | 1087.642 | 11.21177 |
| 11.33    | 1049.426 | 11.11    | 1078.746 | 11.15425 | 1031.996 | 11.07176 | 1088.074 | 11.21415 |
| 11.33388 | 1049.723 | 11.11352 | 1079.293 | 11.16    | 1032.116 | 11.07339 | 1088.382 | 11.21522 |
| 11.34    | 1050.205 | 11.11583 | 1079.662 | 11.16425 | 1032.211 | 11.07467 | 1088.375 | 11.21641 |
| 11.34388 | 1050.512 | 11.1169  | 1079.834 | 11.17    | 1032.384 | 11.07739 | 1088.334 | 11.21754 |
| 11.35    | 1051.01  | 11.11836 | 1080.069 | 11.17425 | 1032.519 | 11.07899 | 1088.402 | 11.2193  |
| 11.35388 | 1051.328 | 11.11951 | 1080.257 | 11.18    | 1032.748 | 11.08    | 1088.463 | 11.22112 |
| 11.36    | 1051.842 | 11.12081 | 1080.47  | 11.18425 | 1032.924 | 11.08182 | 1088.583 | 11.2271  |
| 11.36388 | 1052.17  | 11.12206 | 1080.674 | 11.18541 | 1032.975 | 11.08347 | 1088.682 | 11.23    |
| 11.37    | 1052.701 | 11.12331 | 1080.88  | 11.18743 | 1033.068 | 11.08512 | 1088.765 | 11.23683 |
| 11.37388 | 1053.04  | 11.1251  | 1081.176 | 11.18849 | 1033.118 | 11.08756 | 1088.885 | 11.24    |
| 11.38    | 1053.588 | 11.12631 | 1081.378 | 11.18954 | 1033.168 | 11.08999 | 1089.012 | 11.24683 |
| 11.38388 | 1053.937 | 11.12805 | 1081.668 | 11.19067 | 1033.223 | 11.09279 | 1089.161 | 11.24874 |
| 11.39    | 1054.501 | 11.12969 | 1081.944 | 11.19182 | 1033.279 | 11.09763 | 1089.429 | 11.24979 |
| 11.39388 | 1054.861 | 11.13094 | 1082.154 | 11.1934  | 1033.359 | 11.1     | 1089.56  | 11.25107 |
| 11.4     | 1055.442 | 11.13239 | 1082.4   | 11.19505 | 1033.446 | 11.10554 | 1089.869 | 11.25543 |
| 11.40388 | 1055.813 | 11.13365 | 1082.614 | 11.19733 | 1033.568 | 11.11    | 1090.126 | 11.26    |
| 11.41    | 1056.411 | 11.13608 | 1083.03  | 11.19864 | 1033.639 | 11.11554 | 1090.448 | 11.26499 |
| 11.41388 | 1056.792 | 11.13809 | 1083.376 | 11.2     | 1033.715 | 11.12    | 1090.715 | 11.27    |
| 11.42    | 1057.407 | 11.14    | 1083.706 | 11.20149 | 1033.8   | 11.12554 | 1091.048 | 11.27499 |
| 11.42388 | 1057.799 | 11.14141 | 1083.951 | 11.20307 | 1033.892 | 11.13    | 1091.325 | 11.28    |
| 11.43    | 1058.431 | 11.14278 | 1084.191 | 11.2046  | 1033.983 | 11.13554 | 1091.671 | 11.28499 |
| 11.43388 | 1058.834 | 11.14399 | 1084.402 | 11.20632 | 1034.087 | 11.14    | 1091.957 | 11.29    |
| 11.44    | 1059.483 | 11.14504 | 1084.588 | 11.20752 | 1034.161 | 11.14554 | 1092.315 | 11.29499 |
| 11.44388 | 1059.897 | 11.1461  | 1084.774 | 11.20901 | 1034.255 | 11.15    | 1092.611 | 11.3     |
| 11.45    | 1060.564 | 11.14794 | 1085.101 | 11.21021 | 1034.332 | 11.15554 | 1092.982 | 11.30499 |
| 11.45388 | 1060.988 | 11.14979 | 1085.429 | 11.21156 | 1034.42  | 11.16    | 1093.289 | 11.31    |
| 11.46    | 1061.672 | 11.15127 | 1085.694 | 11.21275 | 1034.499 | 11.16554 | 1093.672 | 11.31499 |
| 11.46388 | 1062.108 | 11.15239 | 1085.895 | 11.21394 | 1034.579 | 11.17    | 1093.988 | 11.32    |
| 11.47    | 1062.809 | 11.15351 | 1086.097 | 11.21514 | 1034.661 | 11.17554 | 1094.384 | 11.32499 |
| 11.47388 | 1063.256 | 11.15462 | 1086.3   | 11.21775 | 1034.842 | 11.18    | 1094.711 | 11.33    |
| 11.48    | 1063.975 | 11.15658 | 1086.655 | 11.22    | 1035.003 | 11.18554 | 1095.12  | 11.33499 |
| 11.48388 | 1064.433 | 11.15854 | 1087.013 | 11.22116 | 1035.087 | 11.19    | 1095.456 | 11.34    |
| 11.49    | 1065.169 | 11.16    | 1087.281 | 11.22258 | 1035.193 | 11.19554 | 1095.878 | 11.34499 |

|          |          |          |          |          |          |          |          |          |
|----------|----------|----------|----------|----------|----------|----------|----------|----------|
| 11.49388 | 1065.638 | 11.16224 | 1087.693 | 11.22365 | 1035.273 | 11.2     | 1096.225 | 11.34822 |
| 11.5     | 1066.392 | 11.1642  | 1088.058 | 11.22541 | 1035.406 | 11.20554 | 1096.66  | 11.35    |
| 11.50388 | 1066.872 | 11.16582 | 1088.361 | 11.22717 | 1035.541 | 11.21    | 1097.017 | 11.35212 |
| 11.51    | 1067.644 | 11.16744 | 1088.666 | 11.22836 | 1035.633 | 11.21554 | 1097.465 | 11.35356 |
| 11.51388 | 1068.136 | 11.16907 | 1088.972 | 11.23    | 1035.761 | 11.22    | 1097.833 | 11.35683 |
| 11.52    | 1068.925 | 11.17023 | 1089.193 | 11.23133 | 1035.865 | 11.22554 | 1098.294 | 11.35978 |
| 11.52388 | 1069.428 | 11.17186 | 1089.5   | 11.23255 | 1035.962 | 11.23    | 1098.673 | 11.36336 |
| 11.53    | 1070.236 | 11.17333 | 1089.783 | 11.23421 | 1036.094 | 11.23554 | 1099.147 | 11.37    |
| 11.53102 | 1070.371 | 11.17481 | 1090.067 | 11.23595 | 1036.233 | 11.24    | 1099.536 | 11.37336 |
| 11.5354  | 1070.954 | 11.17694 | 1090.476 | 11.23724 | 1036.337 | 11.24554 | 1100.023 | 11.38    |
| 11.54    | 1071.575 | 11.17907 | 1090.889 | 11.2384  | 1036.432 | 11.24874 | 1100.31  | 11.38336 |
| 11.5443  | 1072.157 | 11.1803  | 1091.129 | 11.23944 | 1036.517 | 11.24987 | 1100.411 | 11.39    |
| 11.55    | 1072.942 | 11.18243 | 1091.544 | 11.2406  | 1036.612 | 11.25134 | 1100.543 | 11.39336 |
| 11.5543  | 1073.536 | 11.18672 | 1092.394 | 11.24194 | 1036.724 | 11.2573  | 1101.088 | 11.4     |
| 11.56    | 1074.337 | 11.19    | 1093.049 | 11.24338 | 1036.844 | 11.26    | 1101.337 | 11.40336 |
| 11.5643  | 1074.943 | 11.19491 | 1094.035 | 11.24441 | 1036.93  | 11.26681 | 1101.969 | 11.41    |
| 11.57    | 1075.76  | 11.2     | 1095.081 | 11.2457  | 1037.039 | 11.26854 | 1102.133 | 11.41336 |
| 11.5743  | 1076.377 | 11.20491 | 1096.093 | 11.24699 | 1037.149 | 11.26992 | 1102.262 | 11.42    |
| 11.58    | 1077.209 | 11.20836 | 1096.817 | 11.24828 | 1037.26  | 11.27134 | 1102.398 | 11.42336 |
| 11.5843  | 1077.838 | 11.21    | 1097.096 | 11.24928 | 1037.346 | 11.27958 | 1103.195 | 11.43    |
| 11.59    | 1078.685 | 11.21224 | 1097.272 | 11.25132 | 1037.522 | 11.28118 | 1103.35  | 11.43336 |
| 11.5943  | 1079.325 | 11.21392 | 1097.414 | 11.25244 | 1037.62  | 11.28941 | 1104.157 | 11.44    |
| 11.6     | 1080.186 | 11.21503 | 1097.518 | 11.25432 | 1037.785 | 11.29118 | 1104.332 | 11.44336 |
| 11.6043  | 1080.837 | 11.21622 | 1097.659 | 11.25622 | 1037.953 | 11.29941 | 1105.159 | 11.45    |
| 11.61    | 1081.712 | 11.21736 | 1097.803 | 11.25968 | 1038.263 | 11.30118 | 1105.339 | 11.45336 |
| 11.6143  | 1082.374 | 11.21914 | 1098.011 | 11.26075 | 1038.36  | 11.30941 | 1106.186 | 11.46    |
| 11.62    | 1083.263 | 11.22014 | 1098.12  | 11.26214 | 1038.486 | 11.31118 | 1106.37  | 11.46336 |
| 11.6243  | 1083.934 | 11.22804 | 1099     | 11.26335 | 1038.598 | 11.31941 | 1107.237 | 11.47    |
| 11.63    | 1084.837 | 11.23    | 1099.222 | 11.26457 | 1038.709 | 11.32118 | 1107.426 | 11.47336 |
| 11.6343  | 1085.519 | 11.2379  | 1100.124 | 11.26669 | 1038.907 | 11.32941 | 1108.313 | 11.48    |
| 11.64    | 1086.434 | 11.24    | 1100.365 | 11.26881 | 1039.106 | 11.33118 | 1108.506 | 11.48336 |
| 11.6443  | 1087.126 | 11.2479  | 1101.281 | 11.27    | 1039.218 | 11.33941 | 1109.414 | 11.49    |
| 11.65    | 1088.054 | 11.24892 | 1101.4   | 11.27221 | 1039.429 | 11.34118 | 1109.612 | 11.49336 |
| 11.6543  | 1088.756 | 11.24999 | 1101.527 | 11.2736  | 1039.561 | 11.34941 | 1110.54  | 11.5     |
| 11.66    | 1089.696 | 11.25144 | 1101.698 | 11.27573 | 1039.768 | 11.35118 | 1110.742 | 11.50336 |
| 11.6643  | 1090.407 | 11.25641 | 1102.29  | 11.27787 | 1039.976 | 11.35941 | 1111.691 | 11.51    |
| 11.67    | 1091.36  | 11.26    | 1102.719 | 11.28    | 1040.185 | 11.36118 | 1111.898 | 11.51336 |
| 11.6743  | 1092.079 | 11.26568 | 1103.403 | 11.28244 | 1040.426 | 11.36941 | 1112.868 | 11.52    |
| 11.68    | 1093.043 | 11.27    | 1103.929 | 11.2846  | 1040.642 | 11.37118 | 1113.079 | 11.52336 |
| 11.6843  | 1093.772 | 11.27568 | 1104.625 | 11.28676 | 1040.861 | 11.37941 | 1114.07  | 11.53    |
| 11.69    | 1094.747 | 11.28    | 1105.161 | 11.28891 | 1041.081 | 11.38118 | 1114.285 | 11.53144 |
| 11.6943  | 1095.484 | 11.28568 | 1105.869 | 11.29    | 1041.192 | 11.38941 | 1115.298 | 11.53477 |
| 11.7     | 1096.471 | 11.29    | 1106.415 | 11.29247 | 1041.445 | 11.39118 | 1115.518 | 11.54    |
| 11.7043  | 1097.216 | 11.29568 | 1107.136 | 11.29613 | 1041.83  | 11.39941 | 1116.551 | 11.54381 |
| 11.71    | 1098.213 | 11.3     | 1107.691 | 11.29896 | 1042.131 | 11.40118 | 1116.776 | 11.55    |
| 11.7143  | 1098.966 | 11.30568 | 1108.425 | 11.3     | 1042.241 | 11.40941 | 1117.83  | 11.55381 |
| 11.72    | 1099.973 | 11.31    | 1108.99  | 11.30324 | 1042.588 | 11.41118 | 1118.06  | 11.56    |

|          |          |          |          |          |          |          |          |          |
|----------|----------|----------|----------|----------|----------|----------|----------|----------|
| 11.7243  | 1100.734 | 11.31568 | 1109.737 | 11.31    | 1043.335 | 11.41941 | 1119.137 | 11.56381 |
| 11.72712 | 1101.236 | 11.32    | 1110.311 | 11.31324 | 1043.696 | 11.42118 | 1119.37  | 11.57    |
| 11.73    | 1101.749 | 11.32568 | 1111.071 | 11.32    | 1044.47  | 11.42941 | 1120.467 | 11.57381 |
| 11.73228 | 1102.156 | 11.33    | 1111.656 | 11.32324 | 1044.844 | 11.43118 | 1120.706 | 11.58    |
| 11.74    | 1103.547 | 11.33568 | 1112.428 | 11.33    | 1045.646 | 11.43941 | 1121.828 | 11.58381 |
| 11.74228 | 1103.957 | 11.34    | 1113.023 | 11.33324 | 1046.033 | 11.44118 | 1122.07  | 11.59    |
| 11.75    | 1105.36  | 11.34568 | 1113.808 | 11.34    | 1046.863 | 11.44941 | 1123.209 | 11.59381 |
| 11.75228 | 1105.774 | 11.35    | 1114.413 | 11.34324 | 1047.263 | 11.45118 | 1123.457 | 11.6     |
| 11.76    | 1107.189 | 11.35568 | 1115.212 | 11.35    | 1048.12  | 11.45859 | 1124.515 | 11.60381 |
| 11.76228 | 1107.606 | 11.36    | 1115.827 | 11.35324 | 1048.533 | 11.46    | 1124.717 | 11.61    |
| 11.77    | 1109.033 | 11.36568 | 1116.639 | 11.36    | 1049.418 | 11.46106 | 1124.868 | 11.61381 |
| 11.77228 | 1109.453 | 11.37    | 1117.264 | 11.36324 | 1049.844 | 11.46847 | 1125.935 | 11.62    |
| 11.78    | 1110.891 | 11.37568 | 1118.089 | 11.37    | 1050.757 | 11.47    | 1126.157 | 11.62381 |
| 11.78228 | 1111.315 | 11.38    | 1118.725 | 11.37324 | 1051.196 | 11.47106 | 1126.311 | 11.63    |
| 11.79    | 1112.763 | 11.38568 | 1119.564 | 11.38    | 1052.136 | 11.47847 | 1127.398 | 11.63381 |
| 11.79228 | 1113.19  | 11.39    | 1120.209 | 11.38324 | 1052.589 | 11.48    | 1127.625 | 11.64    |
| 11.8     | 1114.648 | 11.39568 | 1121.062 | 11.39    | 1053.556 | 11.48106 | 1127.782 | 11.64381 |
| 11.80228 | 1115.078 | 11.4     | 1121.718 | 11.39324 | 1054.022 | 11.48847 | 1128.889 | 11.65    |
| 11.81    | 1116.545 | 11.40568 | 1122.584 | 11.4     | 1055.017 | 11.49    | 1129.12  | 11.65381 |
| 11.81228 | 1116.978 | 11.41    | 1123.25  | 11.40324 | 1055.496 | 11.49106 | 1129.28  | 11.66    |
| 11.82    | 1118.454 | 11.41568 | 1124.13  | 11.41    | 1056.518 | 11.49847 | 1130.407 | 11.66381 |
| 11.82228 | 1118.89  | 11.42    | 1124.807 | 11.41324 | 1057.011 | 11.5     | 1130.642 | 11.67    |
| 11.83    | 1120.375 | 11.42568 | 1125.701 | 11.42    | 1058.061 | 11.50106 | 1130.805 | 11.67381 |
| 11.83228 | 1120.813 | 11.43    | 1126.388 | 11.42324 | 1058.566 | 11.50847 | 1131.953 | 11.68    |
| 11.84    | 1122.306 | 11.43568 | 1127.296 | 11.43    | 1059.644 | 11.51    | 1132.191 | 11.68381 |
| 11.84228 | 1122.746 | 11.44    | 1127.994 | 11.43324 | 1060.162 | 11.51106 | 1132.357 | 11.69    |
| 11.85    | 1124.247 | 11.44568 | 1128.916 | 11.44    | 1061.268 | 11.51847 | 1133.525 | 11.69381 |
| 11.85228 | 1124.69  | 11.45    | 1129.625 | 11.44324 | 1061.8   | 11.52    | 1133.769 | 11.7     |
| 11.86    | 1126.198 | 11.45568 | 1130.561 | 11.45    | 1062.932 | 11.52106 | 1133.938 | 11.70381 |
| 11.86228 | 1126.642 | 11.46    | 1131.28  | 11.45324 | 1063.477 | 11.52847 | 1135.126 | 11.71    |
| 11.87    | 1128.157 | 11.46568 | 1132.23  | 11.46    | 1064.638 | 11.53    | 1135.373 | 11.71381 |
| 11.87228 | 1128.604 | 11.47    | 1132.961 | 11.46324 | 1065.196 | 11.53102 | 1135.539 | 11.7179  |
| 11.88    | 1130.125 | 11.47568 | 1133.925 | 11.47    | 1066.384 | 11.53239 | 1135.762 | 11.72    |
| 11.88228 | 1130.573 | 11.48    | 1134.667 | 11.47324 | 1066.956 | 11.54    | 1137.016 | 11.72191 |
| 11.89    | 1132.1   | 11.48568 | 1135.645 | 11.48    | 1068.171 | 11.54134 | 1137.238 | 11.72939 |
| 11.89228 | 1132.551 | 11.49    | 1136.398 | 11.48324 | 1068.756 | 11.54958 | 1138.616 | 11.73107 |
| 11.9     | 1134.083 | 11.49568 | 1137.391 | 11.49    | 1069.999 | 11.55118 | 1138.883 | 11.73854 |
| 11.90228 | 1134.535 | 11.5     | 1138.154 | 11.49324 | 1070.597 | 11.55941 | 1140.272 | 11.74    |
| 11.91    | 1136.073 | 11.50568 | 1139.162 | 11.5     | 1071.868 | 11.56118 | 1140.572 | 11.74107 |
| 11.91228 | 1136.526 | 11.51    | 1139.936 | 11.50324 | 1072.479 | 11.56941 | 1141.982 | 11.74854 |
| 11.91617 | 1137.303 | 11.51568 | 1140.959 | 11.51    | 1073.778 | 11.57118 | 1142.287 | 11.75    |
| 11.92    | 1138.04  | 11.52    | 1141.744 | 11.51324 | 1074.402 | 11.57941 | 1143.718 | 11.75107 |
| 11.92275 | 1138.48  | 11.52568 | 1142.781 | 11.52    | 1075.729 | 11.58118 | 1144.028 | 11.75854 |
| 11.92487 | 1138.75  | 11.53    | 1143.578 | 11.52324 | 1076.366 | 11.58364 | 1144.447 | 11.76    |
| 11.92698 | 1138.979 | 11.53109 | 1143.78  | 11.53    | 1077.72  | 11.58539 | 1144.724 | 11.76107 |
| 11.93    | 1139.269 | 11.53235 | 1144.012 | 11.53146 | 1078.013 | 11.58714 | 1144.978 | 11.76854 |
| 11.93242 | 1139.473 | 11.53418 | 1144.352 | 11.5349  | 1078.709 | 11.58861 | 1145.173 | 11.76959 |

|          |          |          |          |          |          |          |          |          |
|----------|----------|----------|----------|----------|----------|----------|----------|----------|
| 11.9389  | 1140.164 | 11.53562 | 1144.616 | 11.54    | 1079.752 | 11.58992 | 1145.335 | 11.77122 |
| 11.94    | 1140.286 | 11.53701 | 1144.862 | 11.54393 | 1080.558 | 11.59137 | 1145.501 | 11.77859 |
| 11.94656 | 1141.175 | 11.53841 | 1145.094 | 11.55    | 1081.823 | 11.59325 | 1145.693 | 11.78    |
| 11.95    | 1141.674 | 11.5398  | 1145.31  | 11.55393 | 1082.646 | 11.59625 | 1145.962 | 11.78105 |
| 11.95644 | 1142.611 | 11.54159 | 1145.576 | 11.56    | 1083.936 | 11.59831 | 1146.126 | 11.78841 |
| 11.96    | 1143.107 | 11.54335 | 1145.801 | 11.56393 | 1084.775 | 11.6     | 1146.25  | 11.79    |
| 11.96194 | 1143.37  | 11.54729 | 1146.228 | 11.57    | 1086.09  | 11.60236 | 1146.414 | 11.79105 |
| 11.96413 | 1143.655 | 11.5498  | 1146.45  | 11.57393 | 1086.945 | 11.60374 | 1146.508 | 11.79841 |
| 11.96565 | 1143.844 | 11.55254 | 1146.655 | 11.58    | 1088.285 | 11.60498 | 1146.591 | 11.8     |
| 11.96712 | 1144.025 | 11.55421 | 1146.775 | 11.58393 | 1089.156 | 11.60626 | 1146.678 | 11.80105 |
| 11.96876 | 1144.221 | 11.55566 | 1146.878 | 11.59    | 1090.521 | 11.60755 | 1146.763 | 11.80841 |
| 11.97    | 1144.368 | 11.5571  | 1146.98  | 11.59202 | 1090.976 | 11.60884 | 1146.847 | 11.81    |
| 11.9726  | 1144.67  | 11.55855 | 1147.082 | 11.59377 | 1091.371 | 11.61    | 1146.922 | 11.81105 |
| 11.97385 | 1144.813 | 11.56    | 1147.183 | 11.6     | 1092.799 | 11.61147 | 1147.015 | 11.81841 |
| 11.97644 | 1145.1   | 11.56165 | 1147.298 | 11.60175 | 1093.199 | 11.61265 | 1147.085 | 11.82    |
| 11.98    | 1145.464 | 11.5631  | 1147.394 | 11.61    | 1095.125 | 11.61383 | 1147.151 | 11.82105 |
| 11.98296 | 1145.756 | 11.56431 | 1147.472 | 11.61175 | 1095.532 | 11.61578 | 1147.249 | 11.82841 |
| 11.98556 | 1145.977 | 11.56551 | 1147.546 | 11.61416 | 1096.101 | 11.61773 | 1147.333 | 11.83    |
| 11.98815 | 1146.172 | 11.56672 | 1147.617 | 11.61524 | 1096.353 | 11.61969 | 1147.406 | 11.83105 |
| 11.99    | 1146.299 | 11.57    | 1147.789 | 11.61642 | 1096.632 | 11.62223 | 1147.491 | 11.83252 |
| 11.99296 | 1146.49  | 11.57138 | 1147.853 | 11.61755 | 1096.899 | 11.62612 | 1147.574 | 11.83602 |
| 11.99566 | 1146.627 | 11.57495 | 1147.966 | 11.61932 | 1097.317 | 11.63    | 1147.638 | 11.83857 |
| 12       | 1146.809 | 11.57852 | 1148.05  | 11.62112 | 1097.746 | 11.63445 | 1147.706 | 11.84    |
| 12.00308 | 1146.93  | 11.58    | 1148.081 | 11.62798 | 1099.398 | 11.63834 | 1147.756 | 11.84292 |
| 12.00578 | 1147.018 | 11.58408 | 1148.155 | 11.63    | 1099.885 | 11.64    | 1147.775 | 11.84717 |
| 12.00809 | 1147.086 | 11.58648 | 1148.187 | 11.63784 | 1101.79  | 11.64135 | 1147.79  | 11.85    |
| 12.01    | 1147.138 | 11.58888 | 1148.217 | 11.64    | 1102.32  | 11.64275 | 1147.805 | 11.85171 |
| 12.01264 | 1147.207 | 11.59    | 1148.231 | 11.64784 | 1104.258 | 11.64519 | 1147.829 | 11.85285 |
| 12.01496 | 1147.258 | 11.59275 | 1148.264 | 11.65    | 1104.797 | 11.64763 | 1147.848 | 11.85496 |
| 12.01704 | 1147.299 | 11.59515 | 1148.291 | 11.65784 | 1106.769 | 11.65    | 1147.864 | 11.85629 |
| 12.02    | 1147.347 | 11.59726 | 1148.312 | 11.66    | 1107.317 | 11.65279 | 1147.88  | 11.85763 |
| 12.02238 | 1147.384 | 11.59938 | 1148.33  | 11.66784 | 1109.322 | 11.65941 | 1147.893 | 11.85914 |
| 12.02518 | 1147.416 | 11.60242 | 1148.353 | 11.67    | 1109.879 | 11.66095 | 1147.895 | 11.86021 |
| 12.02798 | 1147.444 | 11.60721 | 1148.37  | 11.67784 | 1111.918 | 11.66756 | 1147.902 | 11.86172 |
| 12.03    | 1147.461 | 11.61    | 1148.376 | 11.68    | 1112.485 | 11.67    | 1147.902 | 11.86322 |
| 12.0332  | 1147.486 | 11.61548 | 1148.383 | 11.68784 | 1114.557 | 11.67756 | 1147.904 | 11.8645  |
| 12.03651 | 1147.505 | 11.62    | 1148.383 | 11.69    | 1115.133 | 11.68    | 1147.905 | 11.86578 |
| 12.03983 | 1147.521 | 11.62548 | 1148.382 | 11.69784 | 1117.24  | 11.6869  | 1147.906 | 11.86706 |
| 12.04379 | 1147.539 | 11.63    | 1148.381 | 11.7     | 1117.826 | 11.69    | 1147.905 | 11.86969 |
| 12.04774 | 1147.552 | 11.63548 | 1148.38  | 11.70784 | 1119.968 | 11.69681 | 1147.902 | 11.873   |
| 12.05    | 1147.558 | 11.64    | 1148.376 | 11.70959 | 1120.449 | 11.7     | 1147.899 | 11.87562 |
| 12.05451 | 1147.57  | 11.64548 | 1148.371 | 11.71213 | 1121.152 | 11.70681 | 1147.894 | 11.87823 |
| 12.06    | 1147.578 | 11.65    | 1148.365 | 11.71973 | 1123.283 | 11.71    | 1147.893 | 11.88    |
| 12.06451 | 1147.584 | 11.65548 | 1148.357 | 11.72109 | 1123.665 | 11.71681 | 1147.89  | 11.88273 |
| 12.07    | 1147.589 | 11.66    | 1148.352 | 11.72869 | 1125.812 | 11.72    | 1147.89  | 11.88485 |
| 12.07451 | 1147.593 | 11.66548 | 1148.346 | 11.73    | 1126.186 | 11.72681 | 1147.888 | 11.88632 |
| 12.08    | 1147.597 | 11.67    | 1148.342 | 11.73138 | 1126.564 | 11.73    | 1147.887 | 11.88778 |

|          |          |          |          |          |          |          |          |          |
|----------|----------|----------|----------|----------|----------|----------|----------|----------|
| 12.08451 | 1147.6   | 11.67548 | 1148.337 | 11.73295 | 1126.912 | 11.73681 | 1147.884 | 11.88925 |
| 12.09    | 1147.604 | 11.68    | 1148.332 | 11.73453 | 1127.237 | 11.74    | 1147.883 | 11.89167 |
| 12.09451 | 1147.606 | 11.68548 | 1148.327 | 11.73831 | 1128.057 | 11.74681 | 1147.881 | 11.89314 |
| 12.1     | 1147.61  | 11.69    | 1148.323 | 11.74    | 1128.43  | 11.75    | 1147.88  | 11.89441 |
| 12.10451 | 1147.613 | 11.69548 | 1148.318 | 11.74433 | 1129.393 | 11.75681 | 1147.88  | 11.89568 |
| 12.11    | 1147.616 | 11.7     | 1148.314 | 11.75    | 1130.658 | 11.76    | 1147.879 | 11.89695 |
| 12.11451 | 1147.619 | 11.70548 | 1148.31  | 11.75433 | 1131.622 | 11.76681 | 1147.879 | 11.9     |
| 12.12    | 1147.623 | 11.71    | 1148.307 | 11.76    | 1132.892 | 11.77    | 1147.878 | 11.90145 |
| 12.12451 | 1147.626 | 11.71548 | 1148.303 | 11.76433 | 1133.863 | 11.77681 | 1147.877 | 11.90495 |
| 12.13    | 1147.63  | 11.72    | 1148.299 | 11.77    | 1135.14  | 11.78    | 1147.877 | 11.90846 |
| 12.13451 | 1147.633 | 11.72548 | 1148.295 | 11.77433 | 1136.115 | 11.78681 | 1147.876 | 11.91    |
| 12.14    | 1147.637 | 11.73    | 1148.292 | 11.78    | 1137.398 | 11.79    | 1147.876 | 11.914   |
| 12.14451 | 1147.641 | 11.73548 | 1148.289 | 11.78433 | 1138.379 | 11.79681 | 1147.877 | 11.91714 |
| 12.15    | 1147.645 | 11.74    | 1148.286 | 11.79    | 1139.668 | 11.8     | 1147.876 | 11.92    |
| 12.15451 | 1147.648 | 11.74548 | 1148.283 | 11.79433 | 1140.653 | 11.80681 | 1147.876 | 11.92359 |
| 12.16    | 1147.652 | 11.75    | 1148.28  | 11.79895 | 1141.706 | 11.81    | 1147.876 | 11.92672 |
| 12.16451 | 1147.655 | 11.75548 | 1148.277 | 11.8     | 1141.946 | 11.81681 | 1147.876 | 11.92929 |
| 12.17    | 1147.66  | 11.76    | 1148.275 | 11.80303 | 1142.578 | 11.82    | 1147.877 | 11.93037 |
| 12.17451 | 1147.663 | 11.76548 | 1148.272 | 11.80531 | 1142.982 | 11.82681 | 1147.877 | 11.93293 |
| 12.18    | 1147.667 | 11.76948 | 1148.27  | 11.80759 | 1143.332 | 11.83    | 1147.878 | 11.93841 |
| 12.18451 | 1147.671 | 11.77057 | 1148.27  | 11.81    | 1143.666 | 11.83681 | 1147.878 | 11.94    |
| 12.19    | 1147.675 | 11.77458 | 1148.268 | 11.81261 | 1143.989 | 11.84    | 1147.878 | 11.94626 |
| 12.19451 | 1147.678 | 11.78    | 1148.265 | 11.81377 | 1144.116 | 11.84681 | 1147.879 | 11.95    |
| 12.2     | 1147.682 | 11.78458 | 1148.263 | 11.81588 | 1144.336 | 11.85    | 1147.879 | 11.95626 |
| 12.20451 | 1147.686 | 11.79    | 1148.261 | 11.81703 | 1144.457 | 11.85681 | 1147.88  | 11.96    |
| 12.21    | 1147.69  | 11.79458 | 1148.259 | 11.81844 | 1144.608 | 11.86    | 1147.881 | 11.96626 |
| 12.21451 | 1147.693 | 11.8     | 1148.257 | 11.81984 | 1144.766 | 11.86681 | 1147.882 | 11.97    |
| 12.22    | 1147.697 | 11.80458 | 1148.255 | 11.82161 | 1144.976 | 11.87    | 1147.882 | 11.97626 |
| 12.22451 | 1147.701 | 11.81    | 1148.253 | 11.82262 | 1145.107 | 11.87681 | 1147.884 | 11.98    |
| 12.23    | 1147.705 | 11.81458 | 1148.251 | 11.82444 | 1145.352 | 11.88    | 1147.884 | 11.98626 |
| 12.23451 | 1147.708 | 11.82    | 1148.25  | 11.82694 | 1145.7   | 11.88681 | 1147.885 | 11.99    |
| 12.24    | 1147.713 | 11.82458 | 1148.248 | 11.82853 | 1145.921 | 11.89    | 1147.886 | 11.99626 |
| 12.24451 | 1147.716 | 11.83    | 1148.247 | 11.83    | 1146.122 | 11.89681 | 1147.888 | 12       |
| 12.25    | 1147.72  | 11.83458 | 1148.245 | 11.83166 | 1146.331 | 11.9     | 1147.888 | 12.00626 |
| 12.25451 | 1147.723 | 11.84    | 1148.244 | 11.8329  | 1146.476 | 11.90681 | 1147.89  | 12.01    |
| 12.26    | 1147.728 | 11.84458 | 1148.242 | 11.83468 | 1146.657 | 11.91    | 1147.891 | 12.01626 |
| 12.26451 | 1147.731 | 11.85    | 1148.241 | 11.83627 | 1146.798 | 11.91681 | 1147.892 | 12.02    |
| 12.27    | 1147.735 | 11.85458 | 1148.24  | 11.83786 | 1146.919 | 11.92    | 1147.893 | 12.02626 |
| 12.27451 | 1147.739 | 11.86    | 1148.239 | 11.83944 | 1147.023 | 11.92681 | 1147.895 | 12.03    |
| 12.28    | 1147.743 | 11.86458 | 1148.238 | 11.84181 | 1147.162 | 11.93    | 1147.896 | 12.03626 |
| 12.28451 | 1147.746 | 11.87    | 1148.236 | 11.8434  | 1147.232 | 11.93681 | 1147.898 | 12.04    |
| 12.29    | 1147.75  | 11.87458 | 1148.236 | 11.84479 | 1147.288 | 11.94    | 1147.899 | 12.04626 |
| 12.29451 | 1147.753 | 11.88    | 1148.235 | 11.84706 | 1147.373 | 11.94681 | 1147.901 | 12.05    |
| 12.3     | 1147.758 | 11.88458 | 1148.234 | 11.85    | 1147.481 | 11.95    | 1147.901 | 12.05626 |
| 12.30451 | 1147.761 | 11.89    | 1148.233 | 11.8526  | 1147.576 | 11.95681 | 1147.903 | 12.06    |
| 12.31    | 1147.765 | 11.89458 | 1148.232 | 11.85392 | 1147.625 | 11.96    | 1147.904 | 12.06626 |
| 12.31451 | 1147.768 | 11.9     | 1148.231 | 11.85524 | 1147.673 | 11.96681 | 1147.907 | 12.07    |

|          |          |          |          |          |          |          |          |          |
|----------|----------|----------|----------|----------|----------|----------|----------|----------|
| 12.32    | 1147.772 | 11.90458 | 1148.231 | 11.85656 | 1147.722 | 11.97    | 1147.908 | 12.07626 |
| 12.32451 | 1147.776 | 11.91    | 1148.23  | 11.86    | 1147.842 | 11.97681 | 1147.91  | 12.08    |
| 12.33    | 1147.78  | 11.91458 | 1148.229 | 11.86151 | 1147.892 | 11.98    | 1147.911 | 12.08626 |
| 12.33451 | 1147.783 | 11.92    | 1148.229 | 11.86386 | 1147.956 | 11.98681 | 1147.913 | 12.09    |
| 12.34    | 1147.787 | 11.92458 | 1148.228 | 11.86559 | 1147.996 | 11.99    | 1147.914 | 12.09626 |
| 12.34451 | 1147.79  | 11.92965 | 1148.228 | 11.86914 | 1148.053 | 11.99681 | 1147.917 | 12.1     |
| 12.35    | 1147.794 | 11.93072 | 1148.228 | 11.87051 | 1148.072 | 12       | 1147.918 | 12.10626 |
| 12.35451 | 1147.798 | 11.9358  | 1148.227 | 11.87406 | 1148.112 | 12.00681 | 1147.92  | 12.11    |
| 12.36    | 1147.802 | 11.94    | 1148.227 | 11.88    | 1148.144 | 12.01    | 1147.921 | 12.11626 |
| 12.36451 | 1147.805 | 11.9458  | 1148.226 | 11.88406 | 1148.164 | 12.01681 | 1147.924 | 12.12    |
| 12.37    | 1147.809 | 11.95    | 1148.226 | 11.88824 | 1148.183 | 12.02    | 1147.925 | 12.12626 |
| 12.37451 | 1147.812 | 11.9558  | 1148.226 | 11.89    | 1148.192 | 12.02681 | 1147.928 | 12.13    |
| 12.38    | 1147.816 | 11.96    | 1148.226 | 11.89436 | 1148.211 | 12.03    | 1147.929 | 12.13626 |
| 12.38451 | 1147.819 | 11.9658  | 1148.225 | 11.89724 | 1148.221 | 12.03681 | 1147.931 | 12.14    |
| 12.39    | 1147.823 | 11.97    | 1148.225 | 11.9     | 1148.227 | 12.04    | 1147.933 | 12.14626 |
| 12.39451 | 1147.826 | 11.9758  | 1148.225 | 11.90328 | 1148.234 | 12.04681 | 1147.935 | 12.15    |
| 12.4     | 1147.83  | 11.98    | 1148.225 | 11.91    | 1148.235 | 12.05    | 1147.936 | 12.15626 |
| 12.40451 | 1147.833 | 11.9858  | 1148.225 | 11.91328 | 1148.235 | 12.05681 | 1147.939 | 12.16    |
| 12.41    | 1147.837 | 11.99    | 1148.225 | 11.91935 | 1148.233 | 12.06    | 1147.94  | 12.16626 |
| 12.41451 | 1147.84  | 11.9958  | 1148.225 | 11.92087 | 1148.233 | 12.06681 | 1147.943 | 12.17    |
| 12.42    | 1147.844 | 12       | 1148.225 | 11.92693 | 1148.233 | 12.07    | 1147.944 | 12.17626 |
| 12.42451 | 1147.847 | 12.0058  | 1148.225 | 11.92977 | 1148.233 | 12.07681 | 1147.947 | 12.18    |
| 12.43    | 1147.851 | 12.01    | 1148.225 | 11.93324 | 1148.233 | 12.08    | 1147.949 | 12.18626 |
| 12.43451 | 1147.854 | 12.0158  | 1148.225 | 11.93913 | 1148.233 | 12.08681 | 1147.951 | 12.19    |
| 12.44    | 1147.858 | 12.02    | 1148.225 | 11.94084 | 1148.232 | 12.09    | 1147.953 | 12.19626 |
| 12.44451 | 1147.861 | 12.0258  | 1148.225 | 11.94673 | 1148.231 | 12.09681 | 1147.955 | 12.2     |
| 12.45    | 1147.865 | 12.03    | 1148.225 | 11.95    | 1148.23  | 12.1     | 1147.957 | 12.20626 |
| 12.45451 | 1147.868 | 12.0358  | 1148.225 | 11.95673 | 1148.228 | 12.10681 | 1147.96  | 12.21    |
| 12.46    | 1147.872 | 12.04    | 1148.226 | 11.96    | 1148.228 | 12.11    | 1147.961 | 12.21626 |
| 12.46451 | 1147.875 | 12.0458  | 1148.226 | 11.96673 | 1148.227 | 12.11681 | 1147.964 | 12.22    |
| 12.47    | 1147.879 | 12.05    | 1148.226 | 11.97    | 1148.227 | 12.12    | 1147.965 | 12.22626 |
| 12.47451 | 1147.882 | 12.0558  | 1148.226 | 11.97673 | 1148.227 | 12.12681 | 1147.968 | 12.23    |
| 12.48    | 1147.886 | 12.06    | 1148.227 | 11.98    | 1148.226 | 12.13    | 1147.97  | 12.23626 |
| 12.48451 | 1147.889 | 12.0658  | 1148.227 | 11.98673 | 1148.226 | 12.13681 | 1147.973 | 12.24    |
| 12.49    | 1147.892 | 12.07    | 1148.227 | 11.99    | 1148.225 | 12.14    | 1147.974 | 12.24626 |
| 12.49451 | 1147.895 | 12.0758  | 1148.228 | 11.99673 | 1148.225 | 12.14681 | 1147.977 | 12.25    |
| 12.5     | 1147.899 | 12.08    | 1148.228 | 12       | 1148.225 | 12.15    | 1147.978 | 12.25626 |
| 12.50451 | 1147.902 | 12.0858  | 1148.229 | 12.00673 | 1148.225 | 12.15681 | 1147.981 | 12.26    |
| 12.51    | 1147.905 | 12.09    | 1148.229 | 12.01    | 1148.225 | 12.16    | 1147.983 | 12.26626 |
| 12.51451 | 1147.908 | 12.0958  | 1148.229 | 12.01673 | 1148.225 | 12.16681 | 1147.986 | 12.27    |
| 12.52    | 1147.912 | 12.1     | 1148.23  | 12.02    | 1148.225 | 12.17    | 1147.987 | 12.27626 |
| 12.52451 | 1147.915 | 12.1058  | 1148.23  | 12.02673 | 1148.225 | 12.17681 | 1147.99  | 12.28    |
| 12.53    | 1147.918 | 12.11    | 1148.231 | 12.03    | 1148.225 | 12.18    | 1147.992 | 12.28626 |
| 12.53451 | 1147.921 | 12.1158  | 1148.231 | 12.03673 | 1148.226 | 12.18681 | 1147.995 | 12.29    |
| 12.54    | 1147.925 | 12.12    | 1148.232 | 12.04    | 1148.226 | 12.19    | 1147.996 | 12.29626 |
| 12.54451 | 1147.928 | 12.1258  | 1148.232 | 12.04673 | 1148.226 | 12.19681 | 1147.999 | 12.3     |
| 12.55    | 1147.931 | 12.13    | 1148.233 | 12.05    | 1148.226 | 12.2     | 1148     | 12.30626 |



|          |          |         |          |          |          |          |          |          |
|----------|----------|---------|----------|----------|----------|----------|----------|----------|
| 12.55451 | 1147.934 | 12.1358 | 1148.233 | 12.05673 | 1148.227 | 12.20681 | 1148.004 | 12.31    |
| 12.56    | 1147.938 | 12.14   | 1148.234 | 12.06    | 1148.227 | 12.21    | 1148.005 | 12.31626 |
| 12.56451 | 1147.94  | 12.1458 | 1148.234 | 12.06673 | 1148.227 | 12.21681 | 1148.008 | 12.32    |
| 12.57    | 1147.944 | 12.15   | 1148.235 | 12.07    | 1148.228 | 12.22    | 1148.009 | 12.32626 |
| 12.57451 | 1147.947 | 12.1558 | 1148.236 | 12.07673 | 1148.228 | 12.22681 | 1148.013 | 12.33    |
| 12.58    | 1147.95  | 12.16   | 1148.236 | 12.08    | 1148.228 | 12.23    | 1148.014 | 12.33626 |
| 12.58451 | 1147.953 | 12.1658 | 1148.237 | 12.08673 | 1148.229 | 12.23681 | 1148.017 | 12.34    |
| 12.59    | 1147.956 | 12.17   | 1148.237 | 12.09    | 1148.229 | 12.24    | 1148.018 | 12.34626 |
| 12.59451 | 1147.959 | 12.1758 | 1148.238 | 12.09673 | 1148.23  | 12.24681 | 1148.021 | 12.35    |
| 12.6     | 1147.962 | 12.18   | 1148.239 | 12.1     | 1148.23  | 12.25    | 1148.023 | 12.35626 |
| 12.60451 | 1147.965 | 12.1858 | 1148.24  | 12.10673 | 1148.231 | 12.25681 | 1148.026 | 12.36    |
| 12.61    | 1147.968 | 12.19   | 1148.24  | 12.11    | 1148.231 | 12.26    | 1148.027 | 12.36626 |
| 12.61451 | 1147.971 | 12.1958 | 1148.241 | 12.11673 | 1148.232 | 12.26681 | 1148.03  | 12.37    |
| 12.62    | 1147.974 | 12.2    | 1148.241 | 12.12    | 1148.232 | 12.27    | 1148.032 | 12.37626 |
| 12.62451 | 1147.977 | 12.2058 | 1148.242 | 12.12673 | 1148.233 | 12.27681 | 1148.035 | 12.38    |
| 12.63    | 1147.98  | 12.21   | 1148.243 | 12.13    | 1148.233 | 12.28    | 1148.036 | 12.38626 |
| 12.63451 | 1147.983 | 12.2158 | 1148.244 | 12.13673 | 1148.234 | 12.28681 | 1148.039 | 12.39    |
| 12.64    | 1147.986 | 12.22   | 1148.244 | 12.14    | 1148.234 | 12.29    | 1148.041 | 12.39626 |
| 12.64451 | 1147.989 | 12.2258 | 1148.245 | 12.14673 | 1148.235 | 12.29681 | 1148.044 | 12.4     |
| 12.65    | 1147.992 | 12.23   | 1148.246 | 12.15    | 1148.235 | 12.3     | 1148.045 | 12.40626 |
| 12.65451 | 1147.995 | 12.2358 | 1148.247 | 12.15673 | 1148.236 | 12.30681 | 1148.048 | 12.41    |
| 12.66    | 1147.998 | 12.24   | 1148.247 | 12.16    | 1148.236 | 12.31    | 1148.05  | 12.41626 |
| 12.66451 | 1148     | 12.2458 | 1148.248 | 12.16673 | 1148.237 | 12.31681 | 1148.053 | 12.42    |
| 12.67    | 1148.004 | 12.25   | 1148.249 | 12.17    | 1148.238 | 12.32    | 1148.054 | 12.42626 |
| 12.67451 | 1148.006 | 12.2558 | 1148.25  | 12.17397 | 1148.238 | 12.32681 | 1148.057 | 12.43    |
| 12.68    | 1148.009 | 12.26   | 1148.25  | 12.18    | 1148.239 | 12.33    | 1148.059 | 12.43626 |
| 12.68451 | 1148.012 | 12.2658 | 1148.251 | 12.18382 | 1148.239 | 12.33681 | 1148.062 | 12.44    |
| 12.69    | 1148.015 | 12.27   | 1148.252 | 12.19    | 1148.24  | 12.34    | 1148.063 | 12.44626 |
| 12.69451 | 1148.017 | 12.2758 | 1148.253 | 12.19382 | 1148.241 | 12.34681 | 1148.066 | 12.45    |
| 12.7     | 1148.02  | 12.28   | 1148.253 | 12.2     | 1148.242 | 12.35    | 1148.067 | 12.45626 |
| 12.70451 | 1148.023 | 12.2858 | 1148.254 | 12.20382 | 1148.242 | 12.35681 | 1148.07  | 12.46    |
| 12.71    | 1148.026 | 12.29   | 1148.255 | 12.21    | 1148.243 | 12.36    | 1148.072 | 12.46626 |
| 12.71451 | 1148.028 | 12.2958 | 1148.256 | 12.21382 | 1148.244 | 12.36681 | 1148.075 | 12.47    |
| 12.72    | 1148.031 | 12.3    | 1148.257 | 12.22    | 1148.244 | 12.37    | 1148.076 | 12.47626 |
| 12.72451 | 1148.034 | 12.3058 | 1148.257 | 12.22382 | 1148.245 | 12.37681 | 1148.079 | 12.48    |
| 12.73    | 1148.037 | 12.31   | 1148.258 | 12.23    | 1148.246 | 12.38    | 1148.08  | 12.48626 |
| 12.73451 | 1148.039 | 12.3158 | 1148.259 | 12.23382 | 1148.246 | 12.38681 | 1148.083 | 12.49    |
| 12.74    | 1148.042 | 12.32   | 1148.26  | 12.24    | 1148.247 | 12.39    | 1148.085 | 12.49626 |
| 12.74451 | 1148.044 | 12.3258 | 1148.261 | 12.24382 | 1148.248 | 12.39681 | 1148.088 | 12.5     |
| 12.75    | 1148.047 | 12.33   | 1148.261 | 12.25    | 1148.249 | 12.4     | 1148.089 | 12.50626 |
| 12.75451 | 1148.05  | 12.3358 | 1148.262 | 12.25382 | 1148.249 | 12.40681 | 1148.092 | 12.51    |
| 12.76    | 1148.052 | 12.34   | 1148.263 | 12.26    | 1148.25  | 12.41    | 1148.093 | 12.51626 |
| 12.76451 | 1148.055 | 12.3458 | 1148.264 | 12.26382 | 1148.251 | 12.41681 | 1148.096 | 12.52    |
| 12.77    | 1148.058 | 12.35   | 1148.265 | 12.27    | 1148.252 | 12.42    | 1148.097 | 12.52626 |
| 12.77451 | 1148.06  | 12.3558 | 1148.266 | 12.27382 | 1148.253 | 12.42681 | 1148.1   | 12.53    |
| 12.78    | 1148.063 | 12.36   | 1148.266 | 12.28    | 1148.253 | 12.43    | 1148.101 | 12.53626 |
| 12.78451 | 1148.065 | 12.3658 | 1148.267 | 12.28382 | 1148.254 | 12.43681 | 1148.104 | 12.54    |

|          |          |         |          |          |          |          |          |          |
|----------|----------|---------|----------|----------|----------|----------|----------|----------|
| 12.79    | 1148.068 | 12.37   | 1148.268 | 12.29    | 1148.255 | 12.44    | 1148.106 | 12.54626 |
| 12.79451 | 1148.07  | 12.3758 | 1148.269 | 12.29382 | 1148.256 | 12.44681 | 1148.108 | 12.55    |
| 12.8     | 1148.073 | 12.38   | 1148.27  | 12.3     | 1148.257 | 12.45    | 1148.11  | 12.55626 |
| 12.80451 | 1148.075 | 12.3858 | 1148.27  | 12.30382 | 1148.257 | 12.45681 | 1148.113 | 12.56    |
| 12.81    | 1148.078 | 12.39   | 1148.271 | 12.31    | 1148.258 | 12.46    | 1148.114 | 12.56626 |
| 12.81451 | 1148.08  | 12.3958 | 1148.272 | 12.31382 | 1148.259 | 12.46681 | 1148.117 | 12.57    |
| 12.82    | 1148.082 | 12.4    | 1148.273 | 12.32    | 1148.26  | 12.47    | 1148.118 | 12.57626 |
| 12.82451 | 1148.085 | 12.4058 | 1148.274 | 12.32382 | 1148.26  | 12.47681 | 1148.121 | 12.58    |
| 12.83    | 1148.087 | 12.41   | 1148.274 | 12.33    | 1148.261 | 12.48    | 1148.122 | 12.58626 |
| 12.83451 | 1148.089 | 12.4158 | 1148.275 | 12.33382 | 1148.262 | 12.48681 | 1148.125 | 12.59    |
| 12.84    | 1148.092 | 12.42   | 1148.276 | 12.34    | 1148.263 | 12.49    | 1148.126 | 12.59626 |
| 12.84451 | 1148.094 | 12.4258 | 1148.277 | 12.34382 | 1148.264 | 12.49681 | 1148.129 | 12.6     |
| 12.85    | 1148.097 | 12.43   | 1148.278 | 12.35    | 1148.265 | 12.5     | 1148.13  | 12.60626 |
| 12.85451 | 1148.099 | 12.4358 | 1148.279 | 12.35382 | 1148.265 | 12.50681 | 1148.132 | 12.61    |
| 12.86    | 1148.101 | 12.44   | 1148.279 | 12.36    | 1148.266 | 12.51    | 1148.134 | 12.61626 |
| 12.86451 | 1148.103 | 12.4458 | 1148.28  | 12.36382 | 1148.267 | 12.51681 | 1148.136 | 12.62    |
| 12.87    | 1148.106 | 12.45   | 1148.281 | 12.37    | 1148.268 | 12.52    | 1148.138 | 12.62626 |
| 12.87451 | 1148.108 | 12.4558 | 1148.282 | 12.37382 | 1148.269 | 12.52681 | 1148.14  | 12.63    |
| 12.88    | 1148.11  | 12.46   | 1148.283 | 12.38    | 1148.27  | 12.53    | 1148.141 | 12.63626 |
| 12.88451 | 1148.112 | 12.4658 | 1148.284 | 12.38382 | 1148.27  | 12.53681 | 1148.144 | 12.64    |
| 12.89    | 1148.115 | 12.47   | 1148.284 | 12.39    | 1148.271 | 12.54    | 1148.145 | 12.64626 |
| 12.89451 | 1148.117 | 12.4758 | 1148.285 | 12.39382 | 1148.272 | 12.54681 | 1148.148 | 12.65    |
| 12.9     | 1148.119 | 12.48   | 1148.286 | 12.4     | 1148.273 | 12.55    | 1148.149 | 12.65626 |
| 12.90451 | 1148.121 | 12.4858 | 1148.287 | 12.40382 | 1148.273 | 12.55681 | 1148.151 | 12.66    |
| 12.91    | 1148.123 | 12.49   | 1148.287 | 12.41    | 1148.275 | 12.56    | 1148.153 | 12.66626 |
| 12.91451 | 1148.125 | 12.4958 | 1148.288 | 12.41382 | 1148.275 | 12.56681 | 1148.155 | 12.67    |
| 12.92    | 1148.128 | 12.5    | 1148.289 | 12.42    | 1148.276 | 12.57    | 1148.156 | 12.67626 |
| 12.92451 | 1148.13  | 12.5058 | 1148.29  | 12.42382 | 1148.277 | 12.57681 | 1148.159 | 12.68    |
| 12.93    | 1148.132 | 12.51   | 1148.291 | 12.43    | 1148.278 | 12.58    | 1148.16  | 12.68626 |
| 12.93451 | 1148.134 | 12.5158 | 1148.291 | 12.43382 | 1148.278 | 12.58681 | 1148.162 | 12.69    |
| 12.94    | 1148.136 | 12.52   | 1148.292 | 12.44    | 1148.279 | 12.59    | 1148.164 | 12.69626 |
| 12.94451 | 1148.138 | 12.5258 | 1148.293 | 12.44382 | 1148.28  | 12.59681 | 1148.166 | 12.7     |
| 12.95    | 1148.14  | 12.53   | 1148.294 | 12.45    | 1148.281 | 12.6     | 1148.167 | 12.70626 |
| 12.95451 | 1148.142 | 12.5358 | 1148.295 | 12.45382 | 1148.282 | 12.60681 | 1148.17  | 12.71    |
| 12.96    | 1148.144 | 12.54   | 1148.295 | 12.46    | 1148.283 | 12.61    | 1148.171 | 12.71626 |
| 12.96451 | 1148.146 | 12.5458 | 1148.296 | 12.46382 | 1148.283 | 12.61681 | 1148.173 | 12.72    |
| 12.97    | 1148.148 | 12.55   | 1148.297 | 12.47    | 1148.284 | 12.62    | 1148.174 | 12.72626 |
| 12.97451 | 1148.15  | 12.5558 | 1148.298 | 12.47382 | 1148.285 | 12.62681 | 1148.177 | 12.73    |
| 12.98    | 1148.152 | 12.56   | 1148.298 | 12.48    | 1148.286 | 12.63    | 1148.178 | 12.73626 |
| 12.98451 | 1148.154 | 12.5658 | 1148.299 | 12.48382 | 1148.286 | 12.63681 | 1148.18  | 12.74    |
| 12.99    | 1148.156 | 12.57   | 1148.3   | 12.49    | 1148.287 | 12.64    | 1148.181 | 12.74626 |
| 12.99451 | 1148.158 | 12.5758 | 1148.301 | 12.49382 | 1148.288 | 12.64681 | 1148.183 | 12.75    |
| 13       | 1148.16  | 12.58   | 1148.301 | 12.5     | 1148.289 | 12.65    | 1148.184 | 12.75626 |
| 13.00451 | 1148.162 | 12.5858 | 1148.302 | 12.50382 | 1148.29  | 12.65681 | 1148.187 | 12.76    |
| 13.01    | 1148.164 | 12.59   | 1148.303 | 12.51    | 1148.291 | 12.66    | 1148.188 | 12.76626 |
| 13.01451 | 1148.166 | 12.5958 | 1148.304 | 12.51382 | 1148.291 | 12.66681 | 1148.19  | 12.77    |
| 13.02    | 1148.168 | 12.6    | 1148.304 | 12.52    | 1148.292 | 12.67    | 1148.191 | 12.77626 |

|          |          |         |          |          |          |          |          |          |
|----------|----------|---------|----------|----------|----------|----------|----------|----------|
| 13.02451 | 1148.169 | 12.6058 | 1148.305 | 12.52382 | 1148.293 | 12.67681 | 1148.193 | 12.78    |
| 13.03    | 1148.171 | 12.61   | 1148.306 | 12.53    | 1148.294 | 12.68    | 1148.194 | 12.78626 |
| 13.03451 | 1148.173 | 12.6158 | 1148.307 | 12.53382 | 1148.294 | 12.68681 | 1148.196 | 12.79    |
| 13.04    | 1148.175 | 12.62   | 1148.307 | 12.54    | 1148.295 | 12.69    | 1148.197 | 12.79626 |
| 13.04451 | 1148.177 | 12.6258 | 1148.308 | 12.54382 | 1148.296 | 12.69681 | 1148.2   | 12.8     |
| 13.05    | 1148.179 | 12.63   | 1148.309 | 12.55    | 1148.297 | 12.7     | 1148.201 | 12.80626 |
| 13.05451 | 1148.18  | 12.6358 | 1148.309 | 12.55382 | 1148.297 | 12.70681 | 1148.203 | 12.81    |
| 13.06    | 1148.182 | 12.64   | 1148.31  | 12.56    | 1148.298 | 12.71    | 1148.204 | 12.81626 |
| 13.06451 | 1148.184 | 12.6458 | 1148.311 | 12.56382 | 1148.299 | 12.71681 | 1148.206 | 12.82    |
| 13.07    | 1148.186 | 12.65   | 1148.311 | 12.57    | 1148.3   | 12.72    | 1148.207 | 12.82626 |
| 13.07451 | 1148.187 | 12.6558 | 1148.312 | 12.57382 | 1148.3   | 12.72681 | 1148.209 | 12.83    |
| 13.08    | 1148.189 | 12.66   | 1148.313 | 12.58    | 1148.301 | 12.73    | 1148.21  | 12.83626 |
| 13.08451 | 1148.191 | 12.6658 | 1148.314 | 12.58382 | 1148.302 | 12.73681 | 1148.212 | 12.84    |
| 13.09    | 1148.193 | 12.67   | 1148.314 | 12.59    | 1148.303 | 12.74    | 1148.213 | 12.84626 |
| 13.09451 | 1148.194 | 12.6758 | 1148.315 | 12.59382 | 1148.303 | 12.74681 | 1148.215 | 12.85    |
| 13.1     | 1148.196 | 12.68   | 1148.316 | 12.6     | 1148.304 | 12.75    | 1148.216 | 12.85626 |
| 13.10451 | 1148.197 | 12.6858 | 1148.316 | 12.60382 | 1148.305 | 12.75681 | 1148.218 | 12.86    |
| 13.11    | 1148.199 | 12.69   | 1148.317 | 12.61    | 1148.306 | 12.76    | 1148.219 | 12.86626 |
| 13.11451 | 1148.201 | 12.6958 | 1148.318 | 12.61382 | 1148.306 | 12.76681 | 1148.221 | 12.87    |
| 13.12    | 1148.202 | 12.7    | 1148.318 | 12.62    | 1148.307 | 12.77    | 1148.222 | 12.87626 |
| 13.12451 | 1148.204 | 12.7058 | 1148.319 | 12.62382 | 1148.308 | 12.77681 | 1148.224 | 12.88    |
| 13.13    | 1148.206 | 12.71   | 1148.32  | 12.63    | 1148.309 | 12.78    | 1148.224 | 12.88626 |
| 13.13451 | 1148.207 | 12.7158 | 1148.32  | 12.63382 | 1148.309 | 12.78681 | 1148.226 | 12.89    |
| 13.14    | 1148.209 | 12.72   | 1148.321 | 12.64    | 1148.31  | 12.79    | 1148.227 | 12.89626 |
| 13.14451 | 1148.21  | 12.7258 | 1148.322 | 12.64382 | 1148.311 | 12.79681 | 1148.229 | 12.9     |
| 13.15    | 1148.212 | 12.73   | 1148.322 | 12.65    | 1148.311 | 12.8     | 1148.23  | 12.90626 |
| 13.15451 | 1148.213 | 12.7358 | 1148.323 | 12.65382 | 1148.312 | 12.80681 | 1148.232 | 12.91    |
| 13.16    | 1148.215 | 12.74   | 1148.323 | 12.66    | 1148.313 | 12.81    | 1148.233 | 12.91626 |
| 13.16451 | 1148.216 | 12.7458 | 1148.324 | 12.66382 | 1148.313 | 12.81681 | 1148.235 | 12.92    |
| 13.17    | 1148.218 | 12.75   | 1148.325 | 12.67    | 1148.314 | 12.82    | 1148.236 | 12.92626 |
| 13.17451 | 1148.219 | 12.7558 | 1148.325 | 12.67382 | 1148.315 | 12.82681 | 1148.237 | 12.93    |
| 13.18    | 1148.221 | 12.76   | 1148.326 | 12.68    | 1148.316 | 12.83    | 1148.238 | 12.93626 |
| 13.18451 | 1148.222 | 12.7658 | 1148.327 | 12.68382 | 1148.316 | 12.83681 | 1148.24  | 12.94    |
| 13.19    | 1148.224 | 12.77   | 1148.327 | 12.69    | 1148.317 | 12.84    | 1148.241 | 12.94626 |
| 13.19451 | 1148.225 | 12.7758 | 1148.328 | 12.69382 | 1148.317 | 12.84681 | 1148.243 | 12.95    |
| 13.2     | 1148.227 | 12.78   | 1148.328 | 12.7     | 1148.318 | 12.85    | 1148.243 | 12.95626 |
| 13.20451 | 1148.228 | 12.7858 | 1148.329 | 12.70382 | 1148.319 | 12.85681 | 1148.245 | 12.96    |
| 13.21    | 1148.23  | 12.79   | 1148.33  | 12.71    | 1148.32  | 12.86    | 1148.246 | 12.96626 |
| 13.21451 | 1148.231 | 12.7958 | 1148.33  | 12.71382 | 1148.32  | 12.86681 | 1148.248 | 12.97    |
| 13.22    | 1148.233 | 12.8    | 1148.331 | 12.72    | 1148.321 | 12.87    | 1148.248 | 12.97626 |
| 13.22451 | 1148.234 | 12.8058 | 1148.332 | 12.72382 | 1148.321 | 12.87681 | 1148.25  | 12.98    |
| 13.23    | 1148.235 | 12.81   | 1148.332 | 12.73    | 1148.322 | 12.88    | 1148.251 | 12.98626 |
| 13.23451 | 1148.237 | 12.8158 | 1148.333 | 12.73382 | 1148.323 | 12.88681 | 1148.253 | 12.99    |
| 13.24    | 1148.238 | 12.82   | 1148.333 | 12.74    | 1148.323 | 12.89    | 1148.253 | 12.99626 |
| 13.24451 | 1148.239 | 12.8258 | 1148.334 | 12.74382 | 1148.324 | 12.89681 | 1148.255 | 13       |
| 13.25    | 1148.241 | 12.83   | 1148.334 | 12.75    | 1148.325 | 12.9     | 1148.256 | 13.00626 |
| 13.25451 | 1148.242 | 12.8358 | 1148.335 | 12.75382 | 1148.325 | 12.90681 | 1148.257 | 13.01    |

|          |          |         |          |          |          |          |          |          |
|----------|----------|---------|----------|----------|----------|----------|----------|----------|
| 13.26    | 1148.243 | 12.84   | 1148.335 | 12.76    | 1148.326 | 12.91    | 1148.258 | 13.01626 |
| 13.26451 | 1148.245 | 12.8458 | 1148.336 | 12.76382 | 1148.326 | 12.91681 | 1148.26  | 13.02    |
| 13.27    | 1148.246 | 12.85   | 1148.337 | 12.77    | 1148.327 | 12.92    | 1148.261 | 13.02626 |
| 13.27451 | 1148.247 | 12.8558 | 1148.337 | 12.77382 | 1148.328 | 12.92681 | 1148.262 | 13.03    |
| 13.28    | 1148.249 | 12.86   | 1148.338 | 12.78    | 1148.328 | 12.93    | 1148.263 | 13.03626 |
| 13.28451 | 1148.25  | 12.8658 | 1148.338 | 12.78382 | 1148.329 | 12.93681 | 1148.264 | 13.04    |
| 13.29    | 1148.251 | 12.87   | 1148.339 | 12.79    | 1148.33  | 12.94    | 1148.265 | 13.04626 |
| 13.29451 | 1148.252 | 12.8758 | 1148.339 | 12.79382 | 1148.33  | 12.94681 | 1148.267 | 13.05    |
| 13.3     | 1148.254 | 12.88   | 1148.34  | 12.8     | 1148.331 | 12.95    | 1148.267 | 13.05626 |
| 13.30451 | 1148.255 | 12.8858 | 1148.34  | 12.80382 | 1148.331 | 12.95681 | 1148.269 | 13.06    |
| 13.31    | 1148.256 | 12.89   | 1148.341 | 12.81    | 1148.332 | 12.96    | 1148.27  | 13.06626 |
| 13.31451 | 1148.257 | 12.8958 | 1148.341 | 12.81382 | 1148.332 | 12.96681 | 1148.271 | 13.07    |
| 13.32    | 1148.259 | 12.9    | 1148.342 | 12.82    | 1148.333 | 12.97    | 1148.272 | 13.07626 |
| 13.32451 | 1148.26  | 12.9058 | 1148.342 | 12.82382 | 1148.334 | 12.97681 | 1148.273 | 13.08    |
| 13.33    | 1148.261 | 12.91   | 1148.343 | 12.83    | 1148.334 | 12.98    | 1148.274 | 13.08626 |
| 13.33451 | 1148.262 | 12.9158 | 1148.343 | 12.83382 | 1148.335 | 12.98681 | 1148.275 | 13.09    |
| 13.34    | 1148.263 | 12.92   | 1148.344 | 12.84    | 1148.335 | 12.99    | 1148.276 | 13.09626 |
| 13.34451 | 1148.264 | 12.9258 | 1148.344 | 12.84382 | 1148.336 | 12.99681 | 1148.277 | 13.1     |
| 13.35    | 1148.266 | 12.93   | 1148.345 | 12.85    | 1148.336 | 13       | 1148.278 | 13.10626 |
| 13.35451 | 1148.267 | 12.9358 | 1148.345 | 12.85382 | 1148.337 | 13.00681 | 1148.28  | 13.11    |
| 13.36    | 1148.268 | 12.94   | 1148.346 | 12.86    | 1148.338 | 13.01    | 1148.28  | 13.11626 |
| 13.36451 | 1148.269 | 12.9458 | 1148.346 | 12.86382 | 1148.338 | 13.01681 | 1148.282 | 13.12    |
| 13.37    | 1148.27  | 12.95   | 1148.347 | 12.87    | 1148.339 | 13.02    | 1148.282 | 13.12626 |
| 13.37451 | 1148.271 | 12.9558 | 1148.347 | 12.87382 | 1148.339 | 13.02681 | 1148.284 | 13.13    |
| 13.38    | 1148.272 | 12.96   | 1148.348 | 12.88    | 1148.34  | 13.03    | 1148.284 | 13.13626 |
| 13.38451 | 1148.273 | 12.9658 | 1148.348 | 12.88382 | 1148.34  | 13.03681 | 1148.286 | 13.14    |
| 13.39    | 1148.274 | 12.97   | 1148.349 | 12.89    | 1148.341 | 13.04    | 1148.286 | 13.14626 |
| 13.39451 | 1148.275 | 12.9758 | 1148.349 | 12.89382 | 1148.341 | 13.04681 | 1148.287 | 13.15    |
| 13.4     | 1148.277 | 12.98   | 1148.35  | 12.9     | 1148.342 | 13.05    | 1148.288 | 13.15626 |
| 13.40451 | 1148.278 | 12.9858 | 1148.35  | 12.90382 | 1148.342 | 13.05681 | 1148.289 | 13.16    |
| 13.41    | 1148.279 | 12.99   | 1148.351 | 12.91    | 1148.343 | 13.06    | 1148.29  | 13.16626 |
| 13.41451 | 1148.28  | 12.9958 | 1148.351 | 12.91382 | 1148.343 | 13.06681 | 1148.291 | 13.17    |
| 13.42    | 1148.281 | 13      | 1148.351 | 12.92    | 1148.344 | 13.07    | 1148.292 | 13.17626 |
| 13.42451 | 1148.282 | 13.0058 | 1148.352 | 12.92382 | 1148.344 | 13.07681 | 1148.293 | 13.18    |
| 13.43    | 1148.283 | 13.01   | 1148.352 | 12.93    | 1148.345 | 13.08    | 1148.294 | 13.18626 |
| 13.43451 | 1148.284 | 13.0158 | 1148.353 | 12.93382 | 1148.345 | 13.08681 | 1148.295 | 13.19    |
| 13.44    | 1148.285 | 13.02   | 1148.353 | 12.94    | 1148.346 | 13.09    | 1148.296 | 13.19626 |
| 13.44451 | 1148.286 | 13.0258 | 1148.354 | 12.94382 | 1148.346 | 13.09681 | 1148.297 | 13.2     |
| 13.45    | 1148.287 | 13.03   | 1148.354 | 12.95    | 1148.347 | 13.1     | 1148.297 | 13.20626 |
| 13.45451 | 1148.288 | 13.0358 | 1148.355 | 12.95382 | 1148.347 | 13.10681 | 1148.299 | 13.21    |
| 13.46    | 1148.289 | 13.04   | 1148.355 | 12.96    | 1148.348 | 13.11    | 1148.299 | 13.21626 |
| 13.46451 | 1148.29  | 13.0458 | 1148.355 | 12.96382 | 1148.348 | 13.11681 | 1148.3   | 13.22    |
| 13.47    | 1148.291 | 13.05   | 1148.356 | 12.97    | 1148.349 | 13.12    | 1148.301 | 13.22626 |
| 13.47451 | 1148.292 | 13.0558 | 1148.356 | 12.97382 | 1148.349 | 13.12681 | 1148.302 | 13.23    |
| 13.48    | 1148.293 | 13.06   | 1148.357 | 12.98    | 1148.35  | 13.13    | 1148.303 | 13.23626 |
| 13.48451 | 1148.293 | 13.0658 | 1148.357 | 12.98382 | 1148.35  | 13.13681 | 1148.304 | 13.24    |
| 13.49    | 1148.294 | 13.07   | 1148.357 | 12.99    | 1148.35  | 13.14    | 1148.304 | 13.24626 |

|          |          |         |          |          |          |          |          |          |
|----------|----------|---------|----------|----------|----------|----------|----------|----------|
| 13.49451 | 1148.295 | 13.0758 | 1148.358 | 12.99382 | 1148.351 | 13.14681 | 1148.305 | 13.25    |
| 13.5     | 1148.296 | 13.08   | 1148.358 | 13       | 1148.351 | 13.15    | 1148.306 | 13.25626 |
| 13.50451 | 1148.297 | 13.0858 | 1148.359 | 13.00382 | 1148.352 | 13.15681 | 1148.307 | 13.26    |
| 13.51    | 1148.298 | 13.09   | 1148.359 | 13.01    | 1148.352 | 13.16    | 1148.308 | 13.26626 |
| 13.51451 | 1148.299 | 13.0958 | 1148.359 | 13.01382 | 1148.353 | 13.16681 | 1148.309 | 13.27    |
| 13.52    | 1148.3   | 13.1    | 1148.36  | 13.02    | 1148.353 | 13.17    | 1148.309 | 13.27626 |
| 13.52451 | 1148.301 | 13.1058 | 1148.36  | 13.02382 | 1148.353 | 13.17681 | 1148.31  | 13.28    |
| 13.53    | 1148.302 | 13.11   | 1148.36  | 13.03    | 1148.354 | 13.18    | 1148.311 | 13.28626 |
| 13.53451 | 1148.302 | 13.1158 | 1148.361 | 13.03382 | 1148.354 | 13.18681 | 1148.312 | 13.29    |
| 13.54    | 1148.303 | 13.12   | 1148.361 | 13.04    | 1148.355 | 13.19    | 1148.312 | 13.29626 |
| 13.54451 | 1148.304 | 13.1258 | 1148.362 | 13.04382 | 1148.355 | 13.19681 | 1148.313 | 13.3     |
| 13.55    | 1148.305 | 13.13   | 1148.362 | 13.05    | 1148.356 | 13.2     | 1148.314 | 13.30626 |
| 13.55451 | 1148.306 | 13.1358 | 1148.362 | 13.05382 | 1148.356 | 13.20681 | 1148.315 | 13.31    |
| 13.56    | 1148.307 | 13.14   | 1148.363 | 13.06    | 1148.356 | 13.21    | 1148.315 | 13.31626 |
| 13.56451 | 1148.307 | 13.1458 | 1148.363 | 13.06382 | 1148.357 | 13.21681 | 1148.316 | 13.32    |
| 13.57    | 1148.308 | 13.15   | 1148.363 | 13.07    | 1148.357 | 13.22    | 1148.317 | 13.32626 |
| 13.57451 | 1148.309 | 13.1558 | 1148.364 | 13.07382 | 1148.358 | 13.22681 | 1148.318 | 13.33    |
| 13.58    | 1148.31  | 13.16   | 1148.364 | 13.08    | 1148.358 | 13.23    | 1148.318 | 13.33626 |
| 13.58451 | 1148.311 | 13.1658 | 1148.364 | 13.08382 | 1148.358 | 13.23681 | 1148.319 | 13.34    |
| 13.59    | 1148.312 | 13.17   | 1148.365 | 13.09    | 1148.359 | 13.24    | 1148.32  | 13.34626 |
| 13.59451 | 1148.312 | 13.1758 | 1148.365 | 13.09382 | 1148.359 | 13.24681 | 1148.321 | 13.35    |
| 13.6     | 1148.313 | 13.18   | 1148.365 | 13.1     | 1148.36  | 13.25    | 1148.321 | 13.35626 |
| 13.60451 | 1148.314 | 13.1858 | 1148.366 | 13.10382 | 1148.36  | 13.25681 | 1148.322 | 13.36    |
| 13.61    | 1148.315 | 13.19   | 1148.366 | 13.11    | 1148.36  | 13.26    | 1148.323 | 13.36626 |
| 13.61451 | 1148.315 | 13.1958 | 1148.366 | 13.11382 | 1148.361 | 13.26681 | 1148.324 | 13.37    |
| 13.62    | 1148.316 | 13.2    | 1148.367 | 13.12    | 1148.361 | 13.27    | 1148.324 | 13.37626 |
| 13.62451 | 1148.317 | 13.2058 | 1148.367 | 13.12382 | 1148.361 | 13.27681 | 1148.325 | 13.38    |
| 13.63    | 1148.318 | 13.21   | 1148.367 | 13.13    | 1148.362 | 13.28    | 1148.325 | 13.38626 |
| 13.63451 | 1148.318 | 13.2158 | 1148.368 | 13.13382 | 1148.362 | 13.28681 | 1148.326 | 13.39    |
| 13.64    | 1148.319 | 13.22   | 1148.368 | 13.14    | 1148.363 | 13.29    | 1148.327 | 13.39626 |
| 13.64451 | 1148.32  | 13.2258 | 1148.368 | 13.14382 | 1148.363 | 13.29681 | 1148.328 | 13.4     |
| 13.65    | 1148.321 | 13.23   | 1148.369 | 13.15    | 1148.363 | 13.3     | 1148.328 | 13.40626 |
| 13.65451 | 1148.321 | 13.2358 | 1148.369 | 13.15382 | 1148.364 | 13.30681 | 1148.329 | 13.41    |
| 13.66    | 1148.322 | 13.24   | 1148.369 | 13.16    | 1148.364 | 13.31    | 1148.329 | 13.41626 |
| 13.66451 | 1148.323 | 13.2458 | 1148.37  | 13.16382 | 1148.364 | 13.31681 | 1148.33  | 13.42    |
| 13.67    | 1148.323 | 13.25   | 1148.37  | 13.17    | 1148.365 | 13.32    | 1148.331 | 13.42626 |
| 13.67451 | 1148.324 | 13.2558 | 1148.37  | 13.17382 | 1148.365 | 13.32681 | 1148.332 | 13.43    |
| 13.68    | 1148.325 | 13.26   | 1148.37  | 13.18    | 1148.365 | 13.33    | 1148.332 | 13.43626 |
| 13.68451 | 1148.325 | 13.2658 | 1148.371 | 13.18382 | 1148.366 | 13.33681 | 1148.333 | 13.44    |
| 13.69    | 1148.326 | 13.27   | 1148.371 | 13.19    | 1148.366 | 13.34    | 1148.333 | 13.44626 |
| 13.69451 | 1148.327 | 13.2758 | 1148.371 | 13.19382 | 1148.366 | 13.34681 | 1148.334 | 13.45    |
| 13.7     | 1148.327 | 13.28   | 1148.372 | 13.2     | 1148.367 | 13.35    | 1148.334 | 13.45626 |
| 13.70451 | 1148.328 | 13.2858 | 1148.372 | 13.20382 | 1148.367 | 13.35681 | 1148.335 | 13.46    |
| 13.71    | 1148.329 | 13.29   | 1148.372 | 13.21    | 1148.367 | 13.36    | 1148.336 | 13.46626 |
| 13.71451 | 1148.329 | 13.2958 | 1148.372 | 13.21382 | 1148.368 | 13.36681 | 1148.336 | 13.47    |
| 13.72    | 1148.33  | 13.3    | 1148.373 | 13.22    | 1148.368 | 13.37    | 1148.337 | 13.47626 |
| 13.72451 | 1148.331 | 13.3058 | 1148.373 | 13.22382 | 1148.368 | 13.37681 | 1148.338 | 13.48    |

|          |          |         |          |          |          |          |          |          |
|----------|----------|---------|----------|----------|----------|----------|----------|----------|
| 13.73    | 1148.331 | 13.31   | 1148.373 | 13.23    | 1148.369 | 13.38    | 1148.338 | 13.48626 |
| 13.73451 | 1148.332 | 13.3158 | 1148.374 | 13.23382 | 1148.369 | 13.38681 | 1148.339 | 13.49    |
| 13.74    | 1148.333 | 13.32   | 1148.374 | 13.24    | 1148.369 | 13.39    | 1148.339 | 13.49626 |
| 13.74451 | 1148.333 | 13.3258 | 1148.374 | 13.24382 | 1148.369 | 13.39681 | 1148.34  | 13.5     |
| 13.75    | 1148.334 | 13.33   | 1148.374 | 13.25    | 1148.37  | 13.4     | 1148.34  | 13.50626 |
| 13.75451 | 1148.334 | 13.3358 | 1148.375 | 13.25382 | 1148.37  | 13.40681 | 1148.341 | 13.51    |
| 13.76    | 1148.335 | 13.34   | 1148.375 | 13.26    | 1148.37  | 13.41    | 1148.341 | 13.51626 |
| 13.76451 | 1148.336 | 13.3458 | 1148.375 | 13.26382 | 1148.371 | 13.41681 | 1148.342 | 13.52    |
| 13.77    | 1148.336 | 13.35   | 1148.375 | 13.27    | 1148.371 | 13.42    | 1148.342 | 13.52626 |
| 13.77451 | 1148.337 | 13.3558 | 1148.376 | 13.27382 | 1148.371 | 13.42681 | 1148.343 | 13.53    |
| 13.78    | 1148.337 | 13.36   | 1148.376 | 13.28    | 1148.371 | 13.43    | 1148.343 | 13.53626 |
| 13.78451 | 1148.338 | 13.3658 | 1148.376 | 13.28382 | 1148.372 | 13.43681 | 1148.344 | 13.54    |
| 13.79    | 1148.339 | 13.37   | 1148.376 | 13.29    | 1148.372 | 13.44    | 1148.344 | 13.54626 |
| 13.79451 | 1148.339 | 13.3758 | 1148.377 | 13.29382 | 1148.372 | 13.44681 | 1148.345 | 13.55    |
| 13.8     | 1148.34  | 13.38   | 1148.377 | 13.3     | 1148.373 | 13.45    | 1148.346 | 13.55626 |
| 13.80451 | 1148.34  | 13.3858 | 1148.377 | 13.30382 | 1148.373 | 13.45681 | 1148.346 | 13.56    |
| 13.81    | 1148.341 | 13.39   | 1148.377 | 13.31    | 1148.373 | 13.46    | 1148.347 | 13.56626 |
| 13.81451 | 1148.341 | 13.3958 | 1148.378 | 13.31382 | 1148.373 | 13.46681 | 1148.347 | 13.57    |
| 13.82    | 1148.342 | 13.4    | 1148.378 | 13.32    | 1148.374 | 13.47    | 1148.348 | 13.57626 |
| 13.82451 | 1148.342 | 13.4058 | 1148.378 | 13.32382 | 1148.374 | 13.47681 | 1148.348 | 13.58    |
| 13.83    | 1148.343 | 13.41   | 1148.378 | 13.33    | 1148.374 | 13.48    | 1148.348 | 13.58626 |
| 13.83451 | 1148.343 | 13.4158 | 1148.378 | 13.33382 | 1148.374 | 13.48681 | 1148.349 | 13.59    |
| 13.84    | 1148.344 | 13.42   | 1148.379 | 13.34    | 1148.375 | 13.49    | 1148.349 | 13.59626 |
| 13.84451 | 1148.344 | 13.4258 | 1148.379 | 13.34382 | 1148.375 | 13.49681 | 1148.35  | 13.6     |
| 13.85    | 1148.345 | 13.43   | 1148.379 | 13.35    | 1148.375 | 13.5     | 1148.35  | 13.60626 |
| 13.85451 | 1148.346 | 13.4358 | 1148.379 | 13.35382 | 1148.375 | 13.50681 | 1148.351 | 13.61    |
| 13.86    | 1148.346 | 13.44   | 1148.38  | 13.36    | 1148.376 | 13.51    | 1148.351 | 13.61626 |
| 13.86451 | 1148.347 | 13.4458 | 1148.38  | 13.36382 | 1148.376 | 13.51681 | 1148.352 | 13.62    |
| 13.87    | 1148.347 | 13.45   | 1148.38  | 13.37    | 1148.376 | 13.52    | 1148.352 | 13.62626 |
| 13.87451 | 1148.348 | 13.4558 | 1148.38  | 13.37382 | 1148.376 | 13.52681 | 1148.353 | 13.63    |
| 13.88    | 1148.348 | 13.46   | 1148.38  | 13.38    | 1148.377 | 13.53    | 1148.353 | 13.63626 |
| 13.88451 | 1148.349 | 13.4658 | 1148.381 | 13.38382 | 1148.377 | 13.53681 | 1148.354 | 13.64    |
| 13.89    | 1148.349 | 13.47   | 1148.381 | 13.39    | 1148.377 | 13.54    | 1148.354 | 13.64626 |
| 13.89451 | 1148.349 | 13.4758 | 1148.381 | 13.39382 | 1148.377 | 13.54681 | 1148.355 | 13.65    |
| 13.9     | 1148.35  | 13.48   | 1148.381 | 13.4     | 1148.378 | 13.55    | 1148.355 | 13.65626 |
| 13.90451 | 1148.35  | 13.4858 | 1148.381 | 13.40382 | 1148.378 | 13.55681 | 1148.356 | 13.66    |
| 13.91    | 1148.351 | 13.49   | 1148.382 | 13.41    | 1148.378 | 13.56    | 1148.356 | 13.66626 |
| 13.91451 | 1148.351 | 13.4958 | 1148.382 | 13.41382 | 1148.378 | 13.56681 | 1148.356 | 13.67    |
| 13.92    | 1148.352 | 13.5    | 1148.382 | 13.42    | 1148.379 | 13.57    | 1148.357 | 13.67626 |
| 13.92451 | 1148.352 | 13.5058 | 1148.382 | 13.42382 | 1148.379 | 13.57681 | 1148.357 | 13.68    |
| 13.93    | 1148.353 | 13.51   | 1148.382 | 13.43    | 1148.379 | 13.58    | 1148.357 | 13.68626 |
| 13.93451 | 1148.353 | 13.5158 | 1148.383 | 13.43382 | 1148.379 | 13.58681 | 1148.358 | 13.69    |
| 13.94    | 1148.354 | 13.52   | 1148.383 | 13.44    | 1148.379 | 13.59    | 1148.358 | 13.69626 |
| 13.94451 | 1148.354 | 13.5258 | 1148.383 | 13.44382 | 1148.38  | 13.59681 | 1148.359 | 13.7     |
| 13.95    | 1148.355 | 13.53   | 1148.383 | 13.45    | 1148.38  | 13.6     | 1148.359 | 13.70626 |
| 13.95451 | 1148.355 | 13.5358 | 1148.383 | 13.45382 | 1148.38  | 13.60681 | 1148.36  | 13.71    |
| 13.96    | 1148.355 | 13.54   | 1148.383 | 13.46    | 1148.38  | 13.61    | 1148.36  | 13.71626 |

|          |          |         |          |          |          |          |          |          |
|----------|----------|---------|----------|----------|----------|----------|----------|----------|
| 13.96451 | 1148.356 | 13.5458 | 1148.384 | 13.46382 | 1148.38  | 13.61681 | 1148.36  | 13.72    |
| 13.97    | 1148.356 | 13.55   | 1148.384 | 13.47    | 1148.381 | 13.62    | 1148.361 | 13.72626 |
| 13.97451 | 1148.357 | 13.5558 | 1148.384 | 13.47382 | 1148.381 | 13.62681 | 1148.361 | 13.73    |
| 13.98    | 1148.357 | 13.56   | 1148.384 | 13.48    | 1148.381 | 13.63    | 1148.361 | 13.73626 |
| 13.98451 | 1148.357 | 13.5658 | 1148.384 | 13.48382 | 1148.381 | 13.63681 | 1148.362 | 13.74    |
| 13.99    | 1148.358 | 13.57   | 1148.385 | 13.49    | 1148.382 | 13.64    | 1148.362 | 13.74626 |
| 13.99451 | 1148.358 | 13.5758 | 1148.385 | 13.49382 | 1148.382 | 13.64681 | 1148.363 | 13.75    |
| 14       | 1148.359 | 13.58   | 1148.385 | 13.5     | 1148.382 | 13.65    | 1148.363 | 13.75626 |
| 14.00451 | 1148.359 | 13.5858 | 1148.385 | 13.50382 | 1148.382 | 13.65681 | 1148.363 | 13.76    |
| 14.01    | 1148.36  | 13.59   | 1148.385 | 13.51    | 1148.382 | 13.66    | 1148.364 | 13.76626 |
| 14.01451 | 1148.36  | 13.5958 | 1148.385 | 13.51382 | 1148.382 | 13.66681 | 1148.364 | 13.77    |
| 14.02    | 1148.36  | 13.6    | 1148.386 | 13.52    | 1148.383 | 13.67    | 1148.364 | 13.77626 |
| 14.02451 | 1148.361 | 13.6058 | 1148.386 | 13.52382 | 1148.383 | 13.67681 | 1148.365 | 13.78    |
| 14.03    | 1148.361 | 13.61   | 1148.386 | 13.53    | 1148.383 | 13.68    | 1148.365 | 13.78626 |
| 14.03451 | 1148.361 | 13.6158 | 1148.386 | 13.53382 | 1148.383 | 13.68681 | 1148.365 | 13.79    |
| 14.04    | 1148.362 | 13.62   | 1148.386 | 13.54    | 1148.383 | 13.69    | 1148.366 | 13.79626 |
| 14.04451 | 1148.362 | 13.6258 | 1148.386 | 13.54382 | 1148.384 | 13.69681 | 1148.366 | 13.8     |
| 14.05    | 1148.363 | 13.63   | 1148.386 | 13.55    | 1148.384 | 13.7     | 1148.366 | 13.80626 |
| 14.05451 | 1148.363 | 13.6358 | 1148.387 | 13.55382 | 1148.384 | 13.70681 | 1148.367 | 13.81    |
| 14.06    | 1148.363 | 13.64   | 1148.387 | 13.56    | 1148.384 | 13.71    | 1148.367 | 13.81626 |
| 14.06451 | 1148.364 | 13.6458 | 1148.387 | 13.56382 | 1148.384 | 13.71681 | 1148.367 | 13.82    |
| 14.07    | 1148.364 | 13.65   | 1148.387 | 13.57    | 1148.384 | 13.72    | 1148.368 | 13.82626 |
| 14.07451 | 1148.364 | 13.6558 | 1148.387 | 13.57382 | 1148.385 | 13.72681 | 1148.368 | 13.83    |
| 14.08    | 1148.365 | 13.66   | 1148.387 | 13.58    | 1148.385 | 13.73    | 1148.368 | 13.83626 |
| 14.08451 | 1148.365 | 13.6658 | 1148.388 | 13.58382 | 1148.385 | 13.73681 | 1148.369 | 13.84    |
| 14.09    | 1148.365 | 13.67   | 1148.388 | 13.59    | 1148.385 | 13.74    | 1148.369 | 13.84626 |
| 14.09451 | 1148.366 | 13.6758 | 1148.388 | 13.59382 | 1148.385 | 13.74681 | 1148.369 | 13.85    |
| 14.1     | 1148.366 | 13.68   | 1148.388 | 13.6     | 1148.385 | 13.75    | 1148.37  | 13.85626 |
| 14.10451 | 1148.366 | 13.6858 | 1148.388 | 13.60382 | 1148.386 | 13.75681 | 1148.37  | 13.86    |
| 14.11    | 1148.367 | 13.69   | 1148.388 | 13.61    | 1148.386 | 13.76    | 1148.37  | 13.86626 |
| 14.11451 | 1148.367 | 13.6958 | 1148.388 | 13.61382 | 1148.386 | 13.76681 | 1148.371 | 13.87    |
| 14.12    | 1148.367 | 13.7    | 1148.389 | 13.62    | 1148.386 | 13.77    | 1148.371 | 13.87626 |
| 14.12451 | 1148.368 | 13.7058 | 1148.389 | 13.62382 | 1148.386 | 13.77681 | 1148.371 | 13.88    |
| 14.13    | 1148.368 | 13.71   | 1148.389 | 13.63    | 1148.386 | 13.78    | 1148.371 | 13.88626 |
| 14.13451 | 1148.368 | 13.7158 | 1148.389 | 13.63382 | 1148.387 | 13.78681 | 1148.372 | 13.89    |
| 14.14    | 1148.369 | 13.72   | 1148.389 | 13.64    | 1148.387 | 13.79    | 1148.372 | 13.89626 |
| 14.14451 | 1148.369 | 13.7258 | 1148.389 | 13.64382 | 1148.387 | 13.79681 | 1148.372 | 13.9     |
| 14.15    | 1148.369 | 13.73   | 1148.389 | 13.65    | 1148.387 | 13.8     | 1148.373 | 13.90626 |
| 14.15451 | 1148.37  | 13.7358 | 1148.389 | 13.65382 | 1148.387 | 13.80681 | 1148.373 | 13.91    |
| 14.16    | 1148.37  | 13.74   | 1148.39  | 13.66    | 1148.387 | 13.81    | 1148.373 | 13.91626 |
| 14.16451 | 1148.37  | 13.7458 | 1148.39  | 13.66382 | 1148.387 | 13.81681 | 1148.373 | 13.92    |
| 14.17    | 1148.371 | 13.75   | 1148.39  | 13.67    | 1148.388 | 13.82    | 1148.374 | 13.92626 |
| 14.17451 | 1148.371 | 13.7558 | 1148.39  | 13.67382 | 1148.388 | 13.82681 | 1148.374 | 13.93    |
| 14.18    | 1148.371 | 13.76   | 1148.39  | 13.68    | 1148.388 | 13.83    | 1148.374 | 13.93626 |
| 14.18451 | 1148.371 | 13.7658 | 1148.39  | 13.68382 | 1148.388 | 13.83681 | 1148.375 | 13.94    |
| 14.19    | 1148.372 | 13.77   | 1148.39  | 13.69    | 1148.388 | 13.84    | 1148.375 | 13.94626 |
| 14.19451 | 1148.372 | 13.7758 | 1148.39  | 13.69382 | 1148.388 | 13.84681 | 1148.375 | 13.95    |

|          |          |         |          |          |          |          |          |          |
|----------|----------|---------|----------|----------|----------|----------|----------|----------|
| 14.2     | 1148.372 | 13.78   | 1148.391 | 13.7     | 1148.388 | 13.85    | 1148.375 | 13.95626 |
| 14.20451 | 1148.373 | 13.7858 | 1148.391 | 13.70382 | 1148.389 | 13.85681 | 1148.376 | 13.96    |
| 14.21    | 1148.373 | 13.79   | 1148.391 | 13.71    | 1148.389 | 13.86    | 1148.376 | 13.96626 |
| 14.21451 | 1148.373 | 13.7958 | 1148.391 | 13.71382 | 1148.389 | 13.86681 | 1148.376 | 13.97    |
| 14.22    | 1148.373 | 13.8    | 1148.391 | 13.72    | 1148.389 | 13.87    | 1148.376 | 13.97626 |
| 14.22451 | 1148.374 | 13.8058 | 1148.391 | 13.72382 | 1148.389 | 13.87681 | 1148.377 | 13.98    |
| 14.23    | 1148.374 | 13.81   | 1148.391 | 13.73    | 1148.389 | 13.88    | 1148.377 | 13.98626 |
| 14.23451 | 1148.374 | 13.8158 | 1148.391 | 13.73382 | 1148.389 | 13.88681 | 1148.377 | 13.99    |
| 14.24    | 1148.374 | 13.82   | 1148.391 | 13.74    | 1148.389 | 13.89    | 1148.377 | 13.99626 |
| 14.24451 | 1148.375 | 13.8258 | 1148.392 | 13.74382 | 1148.39  | 13.89681 | 1148.378 | 14       |
| 14.25    | 1148.375 | 13.83   | 1148.392 | 13.75    | 1148.39  | 13.9     | 1148.378 | 14.00626 |
| 14.25451 | 1148.375 | 13.8358 | 1148.392 | 13.75382 | 1148.39  | 13.90681 | 1148.378 | 14.01    |
| 14.26    | 1148.375 | 13.84   | 1148.392 | 13.76    | 1148.39  | 13.91    | 1148.378 | 14.01626 |
| 14.26451 | 1148.376 | 13.8458 | 1148.392 | 13.76382 | 1148.39  | 13.91681 | 1148.378 | 14.02    |
| 14.27    | 1148.376 | 13.85   | 1148.392 | 13.77    | 1148.39  | 13.92    | 1148.379 | 14.02626 |
| 14.27451 | 1148.376 | 13.8558 | 1148.392 | 13.77382 | 1148.39  | 13.92681 | 1148.379 | 14.03    |
| 14.28    | 1148.376 | 13.86   | 1148.392 | 13.78    | 1148.39  | 13.93    | 1148.379 | 14.03626 |
| 14.28451 | 1148.377 | 13.8658 | 1148.392 | 13.78382 | 1148.391 | 13.93681 | 1148.379 | 14.04    |
| 14.29    | 1148.377 | 13.87   | 1148.392 | 13.79    | 1148.391 | 13.94    | 1148.379 | 14.04626 |
| 14.29451 | 1148.377 | 13.8758 | 1148.393 | 13.79382 | 1148.391 | 13.94681 | 1148.38  | 14.05    |
| 14.3     | 1148.377 | 13.88   | 1148.393 | 13.8     | 1148.391 | 13.95    | 1148.38  | 14.05626 |
| 14.30451 | 1148.378 | 13.8858 | 1148.393 | 13.80382 | 1148.391 | 13.95681 | 1148.38  | 14.06    |
| 14.31    | 1148.378 | 13.89   | 1148.393 | 13.81    | 1148.391 | 13.96    | 1148.38  | 14.06626 |
| 14.31451 | 1148.378 | 13.8958 | 1148.393 | 13.81382 | 1148.391 | 13.96681 | 1148.381 | 14.07    |
| 14.32    | 1148.378 | 13.9    | 1148.393 | 13.82    | 1148.391 | 13.97    | 1148.381 | 14.07626 |
| 14.32451 | 1148.379 | 13.9058 | 1148.393 | 13.82382 | 1148.391 | 13.97681 | 1148.381 | 14.08    |
| 14.33    | 1148.379 | 13.91   | 1148.393 | 13.83    | 1148.392 | 13.98    | 1148.381 | 14.08626 |
| 14.33451 | 1148.379 | 13.9158 | 1148.393 | 13.83382 | 1148.392 | 13.98681 | 1148.381 | 14.09    |
| 14.34    | 1148.379 | 13.92   | 1148.393 | 13.84    | 1148.392 | 13.99    | 1148.382 | 14.09626 |
| 14.34451 | 1148.379 | 13.9258 | 1148.394 | 13.84382 | 1148.392 | 13.99681 | 1148.382 | 14.1     |
| 14.35    | 1148.38  | 13.93   | 1148.394 | 13.85    | 1148.392 | 14       | 1148.382 | 14.10626 |
| 14.35451 | 1148.38  | 13.9358 | 1148.394 | 13.85382 | 1148.392 | 14.00681 | 1148.382 | 14.11    |
| 14.36    | 1148.38  | 13.94   | 1148.394 | 13.86    | 1148.392 | 14.01    | 1148.382 | 14.11626 |
| 14.36451 | 1148.38  | 13.9458 | 1148.394 | 13.86382 | 1148.392 | 14.01681 | 1148.383 | 14.12    |
| 14.37    | 1148.381 | 13.95   | 1148.394 | 13.87    | 1148.392 | 14.02    | 1148.383 | 14.12626 |
| 14.37451 | 1148.381 | 13.9558 | 1148.394 | 13.87382 | 1148.392 | 14.02681 | 1148.383 | 14.13    |
| 14.38    | 1148.381 | 13.96   | 1148.394 | 13.88    | 1148.393 | 14.03    | 1148.383 | 14.13626 |
| 14.38451 | 1148.381 | 13.9658 | 1148.394 | 13.88382 | 1148.393 | 14.03681 | 1148.383 | 14.14    |
| 14.39    | 1148.381 | 13.97   | 1148.394 | 13.89    | 1148.393 | 14.04    | 1148.383 | 14.14626 |
| 14.39451 | 1148.382 | 13.9758 | 1148.394 | 13.89382 | 1148.393 | 14.04681 | 1148.384 | 14.15    |
| 14.4     | 1148.382 | 13.98   | 1148.394 | 13.9     | 1148.393 | 14.05    | 1148.384 | 14.15626 |
| 14.40451 | 1148.382 | 13.9858 | 1148.395 | 13.90382 | 1148.393 | 14.05681 | 1148.384 | 14.16    |
| 14.41    | 1148.382 | 13.99   | 1148.395 | 13.91    | 1148.393 | 14.06    | 1148.384 | 14.16626 |
| 14.41451 | 1148.382 | 13.9958 | 1148.395 | 13.91382 | 1148.393 | 14.06681 | 1148.384 | 14.17    |
| 14.42    | 1148.383 | 14      | 1148.395 | 13.92    | 1148.393 | 14.07    | 1148.385 | 14.17626 |
| 14.42451 | 1148.383 | 14.0058 | 1148.395 | 13.92382 | 1148.393 | 14.07681 | 1148.385 | 14.18    |
| 14.43    | 1148.383 | 14.01   | 1148.395 | 13.93    | 1148.394 | 14.08    | 1148.385 | 14.18626 |



|          |          |         |          |          |          |          |          |          |
|----------|----------|---------|----------|----------|----------|----------|----------|----------|
| 14.43451 | 1148.383 | 14.0158 | 1148.395 | 13.93382 | 1148.394 | 14.08681 | 1148.385 | 14.19    |
| 14.44    | 1148.383 | 14.02   | 1148.395 | 13.94    | 1148.394 | 14.09    | 1148.385 | 14.19626 |
| 14.44451 | 1148.383 | 14.0258 | 1148.395 | 13.94382 | 1148.394 | 14.09681 | 1148.385 | 14.2     |
| 14.45    | 1148.384 | 14.03   | 1148.395 | 13.95    | 1148.394 | 14.1     | 1148.386 | 14.20626 |
| 14.45451 | 1148.384 | 14.0358 | 1148.395 | 13.95382 | 1148.394 | 14.10681 | 1148.386 | 14.21    |
| 14.46    | 1148.384 | 14.04   | 1148.395 | 13.96    | 1148.394 | 14.11    | 1148.386 | 14.21626 |
| 14.46451 | 1148.384 | 14.0458 | 1148.395 | 13.96382 | 1148.394 | 14.11681 | 1148.386 | 14.22    |
| 14.47    | 1148.384 | 14.05   | 1148.395 | 13.97    | 1148.394 | 14.12    | 1148.386 | 14.22626 |
| 14.47451 | 1148.385 | 14.0558 | 1148.396 | 13.97382 | 1148.394 | 14.12681 | 1148.386 | 14.23    |
| 14.48    | 1148.385 | 14.06   | 1148.396 | 13.98    | 1148.394 | 14.13    | 1148.386 | 14.23626 |
| 14.48451 | 1148.385 | 14.0658 | 1148.396 | 13.98382 | 1148.394 | 14.13681 | 1148.387 | 14.24    |
| 14.49    | 1148.385 | 14.07   | 1148.396 | 13.99    | 1148.395 | 14.14    | 1148.387 | 14.24626 |
| 14.49451 | 1148.385 | 14.0758 | 1148.396 | 13.99382 | 1148.395 | 14.14681 | 1148.387 | 14.25    |
| 14.5     | 1148.385 | 14.08   | 1148.396 | 14       | 1148.395 | 14.15    | 1148.387 | 14.25626 |
| 14.50451 | 1148.386 | 14.0858 | 1148.396 | 14.00382 | 1148.395 | 14.15681 | 1148.387 | 14.26    |
| 14.51    | 1148.386 | 14.09   | 1148.396 | 14.01    | 1148.395 | 14.16    | 1148.387 | 14.26626 |
| 14.51451 | 1148.386 | 14.0958 | 1148.396 | 14.01382 | 1148.395 | 14.16681 | 1148.388 | 14.27    |
| 14.52    | 1148.386 | 14.1    | 1148.396 | 14.02    | 1148.395 | 14.17    | 1148.388 | 14.27626 |
| 14.52451 | 1148.386 | 14.1058 | 1148.396 | 14.02382 | 1148.395 | 14.17681 | 1148.388 | 14.28    |
| 14.53    | 1148.386 | 14.11   | 1148.396 | 14.03    | 1148.395 | 14.18    | 1148.388 | 14.28626 |
| 14.53451 | 1148.386 | 14.1158 | 1148.396 | 14.03382 | 1148.395 | 14.18681 | 1148.388 | 14.29    |
| 14.54    | 1148.387 | 14.12   | 1148.396 | 14.04    | 1148.395 | 14.19    | 1148.388 | 14.29626 |
| 14.54451 | 1148.387 | 14.1258 | 1148.396 | 14.04382 | 1148.395 | 14.19681 | 1148.388 | 14.3     |
| 14.55    | 1148.387 | 14.13   | 1148.397 | 14.05    | 1148.395 | 14.2     | 1148.389 | 14.30626 |
| 14.55451 | 1148.387 | 14.1358 | 1148.397 | 14.05382 | 1148.395 | 14.20681 | 1148.389 | 14.31    |
| 14.56    | 1148.387 | 14.14   | 1148.397 | 14.06    | 1148.396 | 14.21    | 1148.389 | 14.31626 |
| 14.56451 | 1148.387 | 14.1458 | 1148.397 | 14.06382 | 1148.396 | 14.21681 | 1148.389 | 14.32    |
| 14.57    | 1148.388 | 14.15   | 1148.397 | 14.07    | 1148.396 | 14.22    | 1148.389 | 14.32626 |
| 14.57451 | 1148.388 | 14.1558 | 1148.397 | 14.07382 | 1148.396 | 14.22681 | 1148.389 | 14.33    |
| 14.58    | 1148.388 | 14.16   | 1148.397 | 14.08    | 1148.396 | 14.23    | 1148.389 | 14.33626 |
| 14.58451 | 1148.388 | 14.1658 | 1148.397 | 14.08382 | 1148.396 | 14.23681 | 1148.389 | 14.34    |
| 14.59    | 1148.388 | 14.17   | 1148.397 | 14.09    | 1148.396 | 14.24    | 1148.39  | 14.34626 |
| 14.59451 | 1148.388 | 14.1758 | 1148.397 | 14.09382 | 1148.396 | 14.24681 | 1148.39  | 14.35    |
| 14.6     | 1148.388 | 14.18   | 1148.397 | 14.1     | 1148.396 | 14.25    | 1148.39  | 14.35626 |
| 14.60451 | 1148.389 | 14.1858 | 1148.397 | 14.10382 | 1148.396 | 14.25681 | 1148.39  | 14.36    |
| 14.61    | 1148.389 | 14.19   | 1148.397 | 14.11    | 1148.396 | 14.26    | 1148.39  | 14.36626 |
| 14.61451 | 1148.389 | 14.1958 | 1148.397 | 14.11382 | 1148.396 | 14.26681 | 1148.39  | 14.37    |
| 14.62    | 1148.389 | 14.2    | 1148.397 | 14.12    | 1148.396 | 14.27    | 1148.39  | 14.37626 |
| 14.62451 | 1148.389 | 14.2058 | 1148.397 | 14.12382 | 1148.396 | 14.27681 | 1148.39  | 14.38    |
| 14.63    | 1148.389 | 14.21   | 1148.397 | 14.13    | 1148.397 | 14.28    | 1148.391 | 14.38626 |
| 14.63451 | 1148.389 | 14.2158 | 1148.398 | 14.13382 | 1148.397 | 14.28681 | 1148.391 | 14.39    |
| 14.64    | 1148.389 | 14.22   | 1148.398 | 14.14    | 1148.397 | 14.29    | 1148.391 | 14.39626 |
| 14.64451 | 1148.39  | 14.2258 | 1148.398 | 14.14382 | 1148.397 | 14.29681 | 1148.391 | 14.4     |
| 14.65    | 1148.39  | 14.23   | 1148.398 | 14.15    | 1148.397 | 14.3     | 1148.391 | 14.40626 |
| 14.65451 | 1148.39  | 14.2358 | 1148.398 | 14.15382 | 1148.397 | 14.30681 | 1148.391 | 14.41    |
| 14.66    | 1148.39  | 14.24   | 1148.398 | 14.16    | 1148.397 | 14.31    | 1148.391 | 14.41626 |
| 14.66451 | 1148.39  | 14.2458 | 1148.398 | 14.16382 | 1148.397 | 14.31681 | 1148.391 | 14.42    |

|          |          |         |          |          |          |          |          |          |
|----------|----------|---------|----------|----------|----------|----------|----------|----------|
| 14.67    | 1148.39  | 14.25   | 1148.398 | 14.17    | 1148.397 | 14.32    | 1148.391 | 14.42626 |
| 14.67451 | 1148.39  | 14.2558 | 1148.398 | 14.17382 | 1148.397 | 14.32681 | 1148.392 | 14.43    |
| 14.68    | 1148.39  | 14.26   | 1148.398 | 14.18    | 1148.397 | 14.33    | 1148.392 | 14.43626 |
| 14.68451 | 1148.391 | 14.2658 | 1148.398 | 14.18382 | 1148.397 | 14.33681 | 1148.392 | 14.44    |
| 14.69    | 1148.391 | 14.27   | 1148.398 | 14.19    | 1148.397 | 14.34    | 1148.392 | 14.44626 |
| 14.69451 | 1148.391 | 14.2758 | 1148.398 | 14.19382 | 1148.397 | 14.34681 | 1148.392 | 14.45    |
| 14.7     | 1148.391 | 14.28   | 1148.398 | 14.2     | 1148.397 | 14.35    | 1148.392 | 14.45626 |
| 14.70451 | 1148.391 | 14.2858 | 1148.398 | 14.20382 | 1148.397 | 14.35681 | 1148.392 | 14.46    |
| 14.71    | 1148.391 | 14.29   | 1148.398 | 14.21    | 1148.397 | 14.36    | 1148.392 | 14.46626 |
| 14.71451 | 1148.391 | 14.2958 | 1148.398 | 14.21382 | 1148.397 | 14.36681 | 1148.392 | 14.47    |
| 14.72    | 1148.391 | 14.3    | 1148.398 | 14.22    | 1148.398 | 14.37    | 1148.392 | 14.47626 |
| 14.72451 | 1148.391 | 14.3058 | 1148.398 | 14.22382 | 1148.398 | 14.37681 | 1148.393 | 14.48    |
| 14.73    | 1148.392 | 14.31   | 1148.398 | 14.23    | 1148.398 | 14.38    | 1148.393 | 14.48626 |
| 14.73451 | 1148.392 | 14.3158 | 1148.398 | 14.23382 | 1148.398 | 14.38681 | 1148.393 | 14.49    |
| 14.74    | 1148.392 | 14.32   | 1148.398 | 14.24    | 1148.398 | 14.39    | 1148.393 | 14.49626 |
| 14.74451 | 1148.392 | 14.3258 | 1148.399 | 14.24382 | 1148.398 | 14.39681 | 1148.393 | 14.5     |
| 14.75    | 1148.392 | 14.33   | 1148.399 | 14.25    | 1148.398 | 14.4     | 1148.393 | 14.50626 |
| 14.75451 | 1148.392 | 14.3358 | 1148.399 | 14.25382 | 1148.398 | 14.40681 | 1148.393 | 14.51    |
| 14.76    | 1148.392 | 14.34   | 1148.399 | 14.26    | 1148.398 | 14.41    | 1148.393 | 14.51626 |
| 14.76451 | 1148.392 | 14.3458 | 1148.399 | 14.26382 | 1148.398 | 14.41681 | 1148.393 | 14.52    |
| 14.77    | 1148.392 | 14.35   | 1148.399 | 14.27    | 1148.398 | 14.42    | 1148.393 | 14.52626 |
| 14.77451 | 1148.392 | 14.3558 | 1148.399 | 14.27382 | 1148.398 | 14.42681 | 1148.394 | 14.53    |
| 14.78    | 1148.393 | 14.36   | 1148.399 | 14.28    | 1148.398 | 14.43    | 1148.394 | 14.53626 |
| 14.78451 | 1148.393 | 14.3658 | 1148.399 | 14.28382 | 1148.398 | 14.43681 | 1148.394 | 14.54    |
| 14.79    | 1148.393 | 14.37   | 1148.399 | 14.29    | 1148.398 | 14.44    | 1148.394 | 14.54626 |
| 14.79451 | 1148.393 | 14.3758 | 1148.399 | 14.29382 | 1148.398 | 14.44681 | 1148.394 | 14.55    |
| 14.8     | 1148.393 | 14.38   | 1148.399 | 14.3     | 1148.398 | 14.45    | 1148.394 | 14.55626 |
| 14.80451 | 1148.393 | 14.3858 | 1148.399 | 14.30382 | 1148.398 | 14.45681 | 1148.394 | 14.56    |
| 14.81    | 1148.393 | 14.39   | 1148.399 | 14.31    | 1148.398 | 14.46    | 1148.394 | 14.56626 |
| 14.81451 | 1148.393 | 14.3958 | 1148.399 | 14.31382 | 1148.398 | 14.46681 | 1148.394 | 14.57    |
| 14.82    | 1148.393 | 14.4    | 1148.399 | 14.32    | 1148.398 | 14.47    | 1148.394 | 14.57626 |
| 14.82451 | 1148.393 | 14.4058 | 1148.399 | 14.32382 | 1148.398 | 14.47681 | 1148.394 | 14.58    |
| 14.83    | 1148.394 | 14.41   | 1148.399 | 14.33    | 1148.399 | 14.48    | 1148.394 | 14.58626 |
| 14.83451 | 1148.394 | 14.4158 | 1148.399 | 14.33382 | 1148.399 | 14.48681 | 1148.395 | 14.59    |
| 14.84    | 1148.394 | 14.42   | 1148.399 | 14.34    | 1148.399 | 14.49    | 1148.395 | 14.59626 |
| 14.84451 | 1148.394 | 14.4258 | 1148.399 | 14.34382 | 1148.399 | 14.49681 | 1148.395 | 14.6     |
| 14.85    | 1148.394 | 14.43   | 1148.399 | 14.35    | 1148.399 | 14.5     | 1148.395 | 14.60626 |
| 14.85451 | 1148.394 | 14.4358 | 1148.399 | 14.35382 | 1148.399 | 14.50681 | 1148.395 | 14.61    |
| 14.86    | 1148.394 | 14.44   | 1148.399 | 14.36    | 1148.399 | 14.51    | 1148.395 | 14.61626 |
| 14.86451 | 1148.394 | 14.4458 | 1148.399 | 14.36382 | 1148.399 | 14.51681 | 1148.395 | 14.62    |
| 14.87    | 1148.394 | 14.45   | 1148.399 | 14.37    | 1148.399 | 14.52    | 1148.395 | 14.62626 |
| 14.87451 | 1148.394 | 14.4558 | 1148.4   | 14.37382 | 1148.399 | 14.52681 | 1148.395 | 14.63    |
| 14.88    | 1148.394 | 14.46   | 1148.4   | 14.38    | 1148.399 | 14.53    | 1148.395 | 14.63626 |
| 14.88451 | 1148.394 | 14.4658 | 1148.4   | 14.38382 | 1148.399 | 14.53681 | 1148.395 | 14.64    |
| 14.89    | 1148.395 | 14.47   | 1148.4   | 14.39    | 1148.399 | 14.54    | 1148.395 | 14.64626 |
| 14.89451 | 1148.395 | 14.4758 | 1148.4   | 14.39382 | 1148.399 | 14.54681 | 1148.395 | 14.65    |
| 14.9     | 1148.395 | 14.48   | 1148.4   | 14.4     | 1148.399 | 14.55    | 1148.396 | 14.65626 |

|          |          |         |          |          |          |          |          |          |
|----------|----------|---------|----------|----------|----------|----------|----------|----------|
| 14.90451 | 1148.395 | 14.4858 | 1148.4   | 14.40382 | 1148.399 | 14.55681 | 1148.396 | 14.66    |
| 14.91    | 1148.395 | 14.49   | 1148.4   | 14.41    | 1148.399 | 14.56    | 1148.396 | 14.66626 |
| 14.91451 | 1148.395 | 14.4958 | 1148.4   | 14.41382 | 1148.399 | 14.56681 | 1148.396 | 14.67    |
| 14.92    | 1148.395 | 14.5    | 1148.4   | 14.42    | 1148.399 | 14.57    | 1148.396 | 14.67626 |
| 14.92451 | 1148.395 | 14.5058 | 1148.4   | 14.42382 | 1148.399 | 14.57681 | 1148.396 | 14.68    |
| 14.93    | 1148.395 | 14.51   | 1148.4   | 14.43    | 1148.399 | 14.58    | 1148.396 | 14.68626 |
| 14.93451 | 1148.395 | 14.5158 | 1148.4   | 14.43382 | 1148.399 | 14.58681 | 1148.396 | 14.69    |
| 14.94    | 1148.395 | 14.52   | 1148.4   | 14.44    | 1148.399 | 14.59    | 1148.396 | 14.69626 |
| 14.94451 | 1148.395 | 14.5258 | 1148.4   | 14.44382 | 1148.399 | 14.59681 | 1148.396 | 14.7     |
| 14.95    | 1148.395 | 14.53   | 1148.4   | 14.45    | 1148.399 | 14.6     | 1148.396 | 14.70626 |
| 14.95451 | 1148.396 | 14.5358 | 1148.4   | 14.45382 | 1148.399 | 14.60681 | 1148.396 | 14.71    |
| 14.96    | 1148.396 | 14.54   | 1148.4   | 14.46    | 1148.4   | 14.61    | 1148.396 | 14.71626 |
| 14.96451 | 1148.396 | 14.5458 | 1148.4   | 14.46382 | 1148.4   | 14.61681 | 1148.396 | 14.72    |
| 14.97    | 1148.396 | 14.55   | 1148.4   | 14.47    | 1148.4   | 14.62    | 1148.396 | 14.72626 |
| 14.97451 | 1148.396 | 14.5558 | 1148.4   | 14.47382 | 1148.4   | 14.62681 | 1148.397 | 14.73    |
| 14.98    | 1148.396 | 14.56   | 1148.4   | 14.48    | 1148.4   | 14.63    | 1148.397 | 14.73626 |
| 14.98451 | 1148.396 | 14.5658 | 1148.4   | 14.48382 | 1148.4   | 14.63681 | 1148.397 | 14.74    |
| 14.99    | 1148.396 | 14.57   | 1148.4   | 14.49    | 1148.4   | 14.64    | 1148.397 | 14.74626 |
| 14.99451 | 1148.396 | 14.5758 | 1148.4   | 14.49382 | 1148.4   | 14.64681 | 1148.397 | 14.75    |
| 15       | 1148.396 | 14.58   | 1148.4   | 14.5     | 1148.4   | 14.65    | 1148.397 | 14.75626 |
| 15.00451 | 1148.396 | 14.5858 | 1148.4   | 14.50382 | 1148.4   | 14.65681 | 1148.397 | 14.76    |
| 15.01    | 1148.396 | 14.59   | 1148.4   | 14.51    | 1148.4   | 14.66    | 1148.397 | 14.76626 |
| 15.01451 | 1148.396 | 14.5958 | 1148.4   | 14.51382 | 1148.4   | 14.66681 | 1148.397 | 14.77    |
| 15.02    | 1148.396 | 14.6    | 1148.4   | 14.52    | 1148.4   | 14.67    | 1148.397 | 14.77626 |
| 15.02451 | 1148.396 | 14.6058 | 1148.4   | 14.52382 | 1148.4   | 14.67681 | 1148.397 | 14.78    |
| 15.03    | 1148.397 | 14.61   | 1148.4   | 14.53    | 1148.4   | 14.68    | 1148.397 | 14.78626 |
| 15.03451 | 1148.397 | 14.6158 | 1148.4   | 14.53382 | 1148.4   | 14.68681 | 1148.397 | 14.79    |
| 15.04    | 1148.397 | 14.62   | 1148.4   | 14.54    | 1148.4   | 14.69    | 1148.397 | 14.79626 |
| 15.04451 | 1148.397 | 14.6258 | 1148.4   | 14.54382 | 1148.4   | 14.69681 | 1148.397 | 14.8     |
| 15.05    | 1148.397 | 14.63   | 1148.4   | 14.55    | 1148.4   | 14.7     | 1148.397 | 14.80626 |
| 15.05451 | 1148.397 | 14.6358 | 1148.401 | 14.55382 | 1148.4   | 14.70681 | 1148.397 | 14.81    |
| 15.06    | 1148.397 | 14.64   | 1148.401 | 14.56    | 1148.4   | 14.71    | 1148.397 | 14.81626 |
| 15.06451 | 1148.397 | 14.6458 | 1148.401 | 14.56382 | 1148.4   | 14.71681 | 1148.398 | 14.82    |
| 15.07    | 1148.397 | 14.65   | 1148.401 | 14.57    | 1148.4   | 14.72    | 1148.398 | 14.82626 |
| 15.07451 | 1148.397 | 14.6558 | 1148.401 | 14.57382 | 1148.4   | 14.72681 | 1148.398 | 14.83    |
| 15.08    | 1148.397 | 14.66   | 1148.401 | 14.58    | 1148.4   | 14.73    | 1148.398 | 14.83626 |
| 15.08451 | 1148.397 | 14.6658 | 1148.401 | 14.58382 | 1148.4   | 14.73681 | 1148.398 | 14.84    |
| 15.09    | 1148.397 | 14.67   | 1148.401 | 14.59    | 1148.4   | 14.74    | 1148.398 | 14.84626 |
| 15.09451 | 1148.397 | 14.6758 | 1148.401 | 14.59382 | 1148.4   | 14.74681 | 1148.398 | 14.85    |
| 15.1     | 1148.397 | 14.68   | 1148.401 | 14.6     | 1148.4   | 14.75    | 1148.398 | 14.85626 |
| 15.10451 | 1148.397 | 14.6858 | 1148.401 | 14.60382 | 1148.4   | 14.75681 | 1148.398 | 14.86    |
| 15.11    | 1148.397 | 14.69   | 1148.401 | 14.61    | 1148.4   | 14.76    | 1148.398 | 14.86626 |
| 15.11451 | 1148.397 | 14.6958 | 1148.401 | 14.61382 | 1148.4   | 14.76681 | 1148.398 | 14.87    |
| 15.12    | 1148.398 | 14.7    | 1148.401 | 14.62    | 1148.4   | 14.77    | 1148.398 | 14.87626 |
| 15.12451 | 1148.398 | 14.7058 | 1148.401 | 14.62382 | 1148.4   | 14.77681 | 1148.398 | 14.88    |
| 15.13    | 1148.398 | 14.71   | 1148.401 | 14.63    | 1148.4   | 14.78    | 1148.398 | 14.88626 |
| 15.13451 | 1148.398 | 14.7158 | 1148.401 | 14.63382 | 1148.4   | 14.78681 | 1148.398 | 14.89    |

|          |          |         |          |          |          |          |          |          |
|----------|----------|---------|----------|----------|----------|----------|----------|----------|
| 15.14    | 1148.398 | 14.72   | 1148.401 | 14.64    | 1148.401 | 14.79    | 1148.398 | 14.89626 |
| 15.14451 | 1148.398 | 14.7258 | 1148.401 | 14.64382 | 1148.401 | 14.79681 | 1148.398 | 14.9     |
| 15.15    | 1148.398 | 14.73   | 1148.401 | 14.65    | 1148.401 | 14.8     | 1148.398 | 14.90626 |
| 15.15451 | 1148.398 | 14.7358 | 1148.401 | 14.65382 | 1148.401 | 14.80681 | 1148.398 | 14.91    |
| 15.16    | 1148.398 | 14.74   | 1148.401 | 14.66    | 1148.401 | 14.81    | 1148.398 | 14.91626 |
| 15.16451 | 1148.398 | 14.7458 | 1148.401 | 14.66382 | 1148.401 | 14.81681 | 1148.398 | 14.92    |
| 15.17    | 1148.398 | 14.75   | 1148.401 | 14.67    | 1148.401 | 14.82    | 1148.399 | 14.92626 |
| 15.17451 | 1148.398 | 14.7558 | 1148.401 | 14.67382 | 1148.401 | 14.82681 | 1148.399 | 14.93    |
| 15.18    | 1148.398 | 14.76   | 1148.401 | 14.68    | 1148.401 | 14.83    | 1148.399 | 14.93626 |
| 15.18451 | 1148.398 | 14.7658 | 1148.401 | 14.68382 | 1148.401 | 14.83681 | 1148.399 | 14.94    |
| 15.19    | 1148.398 | 14.77   | 1148.401 | 14.69    | 1148.401 | 14.84    | 1148.399 | 14.94626 |
| 15.19451 | 1148.398 | 14.7758 | 1148.401 | 14.69382 | 1148.401 | 14.84681 | 1148.399 | 14.95    |
| 15.2     | 1148.398 | 14.78   | 1148.401 | 14.7     | 1148.401 | 14.85    | 1148.399 | 14.95626 |
| 15.20451 | 1148.398 | 14.7858 | 1148.401 | 14.70382 | 1148.401 | 14.85681 | 1148.399 | 14.96    |
| 15.21    | 1148.398 | 14.79   | 1148.401 | 14.71    | 1148.401 | 14.86    | 1148.399 | 14.96626 |
| 15.21451 | 1148.398 | 14.7958 | 1148.401 | 14.71382 | 1148.401 | 14.86681 | 1148.399 | 14.97    |
| 15.22    | 1148.398 | 14.8    | 1148.401 | 14.72    | 1148.401 | 14.87    | 1148.399 | 14.97626 |
| 15.22451 | 1148.399 | 14.8058 | 1148.401 | 14.72382 | 1148.401 | 14.87681 | 1148.399 | 14.98    |
| 15.23    | 1148.399 | 14.81   | 1148.401 | 14.73    | 1148.401 | 14.88    | 1148.399 | 14.98626 |
| 15.23451 | 1148.399 | 14.8158 | 1148.401 | 14.73382 | 1148.401 | 14.88681 | 1148.399 | 14.99    |
| 15.24    | 1148.399 | 14.82   | 1148.401 | 14.74    | 1148.401 | 14.89    | 1148.399 | 14.99626 |
| 15.24451 | 1148.399 | 14.8258 | 1148.401 | 14.74382 | 1148.401 | 14.89681 | 1148.399 | 15       |
| 15.25    | 1148.399 | 14.83   | 1148.401 | 14.75    | 1148.401 | 14.9     | 1148.399 | 15.00626 |
| 15.25451 | 1148.399 | 14.8358 | 1148.401 | 14.75382 | 1148.401 | 14.90681 | 1148.399 | 15.01    |
| 15.26    | 1148.399 | 14.84   | 1148.401 | 14.76    | 1148.401 | 14.91    | 1148.399 | 15.01626 |
| 15.26451 | 1148.399 | 14.8458 | 1148.401 | 14.76382 | 1148.401 | 14.91681 | 1148.399 | 15.02    |
| 15.27    | 1148.399 | 14.85   | 1148.401 | 14.77    | 1148.401 | 14.92    | 1148.399 | 15.02626 |
| 15.27451 | 1148.399 | 14.8558 | 1148.401 | 14.77382 | 1148.401 | 14.92681 | 1148.399 | 15.03    |
| 15.28    | 1148.399 | 14.86   | 1148.401 | 14.78    | 1148.401 | 14.93    | 1148.399 | 15.03626 |
| 15.28451 | 1148.399 | 14.8658 | 1148.401 | 14.78382 | 1148.401 | 14.93681 | 1148.399 | 15.04    |
| 15.29    | 1148.399 | 14.87   | 1148.401 | 14.79    | 1148.401 | 14.94    | 1148.399 | 15.04626 |
| 15.29451 | 1148.399 | 14.8758 | 1148.401 | 14.79382 | 1148.401 | 14.94681 | 1148.399 | 15.05    |
| 15.3     | 1148.399 | 14.88   | 1148.401 | 14.8     | 1148.401 | 14.95    | 1148.399 | 15.05626 |
| 15.30451 | 1148.399 | 14.8858 | 1148.401 | 14.80382 | 1148.401 | 14.95681 | 1148.4   | 15.06    |
| 15.31    | 1148.399 | 14.89   | 1148.401 | 14.81    | 1148.401 | 14.96    | 1148.4   | 15.06626 |
| 15.31451 | 1148.399 | 14.8958 | 1148.401 | 14.81382 | 1148.401 | 14.96681 | 1148.4   | 15.07    |
| 15.32    | 1148.399 | 14.9    | 1148.401 | 14.82    | 1148.401 | 14.97    | 1148.4   | 15.07626 |
| 15.32451 | 1148.399 | 14.9058 | 1148.402 | 14.82382 | 1148.401 | 14.97681 | 1148.4   | 15.08    |
| 15.33    | 1148.399 | 14.91   | 1148.402 | 14.83    | 1148.401 | 14.98    | 1148.4   | 15.08626 |
| 15.33451 | 1148.399 | 14.9158 | 1148.402 | 14.83382 | 1148.401 | 14.98681 | 1148.4   | 15.09    |
| 15.34    | 1148.399 | 14.92   | 1148.402 | 14.84    | 1148.401 | 14.99    | 1148.4   | 15.09626 |
| 15.34451 | 1148.399 | 14.9258 | 1148.402 | 14.84382 | 1148.401 | 14.99681 | 1148.4   | 15.1     |
| 15.35    | 1148.399 | 14.93   | 1148.402 | 14.85    | 1148.401 | 15       | 1148.4   | 15.10626 |
| 15.35451 | 1148.399 | 14.9358 | 1148.402 | 14.85382 | 1148.401 | 15.00681 | 1148.4   | 15.11    |
| 15.36    | 1148.4   | 14.94   | 1148.402 | 14.86    | 1148.401 | 15.01    | 1148.4   | 15.11626 |
| 15.36451 | 1148.4   | 14.9458 | 1148.402 | 14.86382 | 1148.401 | 15.01681 | 1148.4   | 15.12    |
| 15.37    | 1148.4   | 14.95   | 1148.402 | 14.87    | 1148.401 | 15.02    | 1148.4   | 15.12626 |

|          |          |         |          |          |          |          |          |          |
|----------|----------|---------|----------|----------|----------|----------|----------|----------|
| 15.37451 | 1148.4   | 14.9558 | 1148.402 | 14.87382 | 1148.401 | 15.02681 | 1148.4   | 15.13    |
| 15.38    | 1148.4   | 14.96   | 1148.402 | 14.88    | 1148.401 | 15.03    | 1148.4   | 15.13626 |
| 15.38451 | 1148.4   | 14.9658 | 1148.402 | 14.88382 | 1148.401 | 15.03681 | 1148.4   | 15.14    |
| 15.39    | 1148.4   | 14.97   | 1148.402 | 14.89    | 1148.401 | 15.04    | 1148.4   | 15.14626 |
| 15.39451 | 1148.4   | 14.9758 | 1148.402 | 14.89382 | 1148.401 | 15.04681 | 1148.4   | 15.15    |
| 15.4     | 1148.4   | 14.98   | 1148.402 | 14.9     | 1148.401 | 15.05    | 1148.4   | 15.15626 |
| 15.40451 | 1148.4   | 14.9858 | 1148.402 | 14.90382 | 1148.401 | 15.05681 | 1148.4   | 15.16    |
| 15.41    | 1148.4   | 14.99   | 1148.402 | 14.91    | 1148.401 | 15.06    | 1148.4   | 15.16626 |
| 15.41451 | 1148.4   | 14.9958 | 1148.402 | 14.91382 | 1148.402 | 15.06681 | 1148.4   | 15.17    |
| 15.42    | 1148.4   | 15      | 1148.402 | 14.92    | 1148.402 | 15.07    | 1148.4   | 15.17626 |
| 15.42451 | 1148.4   | 15.0058 | 1148.402 | 14.92382 | 1148.402 | 15.07681 | 1148.4   | 15.18    |
| 15.43    | 1148.4   | 15.01   | 1148.402 | 14.93    | 1148.402 | 15.08    | 1148.4   | 15.18626 |
| 15.43451 | 1148.4   | 15.0158 | 1148.402 | 14.93382 | 1148.402 | 15.08681 | 1148.4   | 15.19    |
| 15.44    | 1148.4   | 15.02   | 1148.402 | 14.94    | 1148.402 | 15.09    | 1148.4   | 15.19626 |
| 15.44451 | 1148.4   | 15.0258 | 1148.402 | 14.94382 | 1148.402 | 15.09681 | 1148.4   | 15.2     |
| 15.45    | 1148.4   | 15.03   | 1148.402 | 14.95    | 1148.402 | 15.1     | 1148.4   | 15.20626 |
| 15.45451 | 1148.4   | 15.0358 | 1148.402 | 14.95382 | 1148.402 | 15.10681 | 1148.4   | 15.21    |
| 15.46    | 1148.4   | 15.04   | 1148.402 | 14.96    | 1148.402 | 15.11    | 1148.4   | 15.21626 |
| 15.46451 | 1148.4   | 15.0458 | 1148.402 | 14.96382 | 1148.402 | 15.11681 | 1148.4   | 15.22    |
| 15.47    | 1148.4   | 15.05   | 1148.402 | 14.97    | 1148.402 | 15.12    | 1148.4   | 15.22626 |
| 15.47451 | 1148.4   | 15.0558 | 1148.402 | 14.97382 | 1148.402 | 15.12681 | 1148.4   | 15.23    |
| 15.48    | 1148.4   | 15.06   | 1148.402 | 14.98    | 1148.402 | 15.13    | 1148.401 | 15.23626 |
| 15.48451 | 1148.4   | 15.0658 | 1148.402 | 14.98382 | 1148.402 | 15.13681 | 1148.401 | 15.24    |
| 15.49    | 1148.4   | 15.07   | 1148.402 | 14.99    | 1148.402 | 15.14    | 1148.401 | 15.24626 |
| 15.49451 | 1148.4   | 15.0758 | 1148.402 | 14.99382 | 1148.402 | 15.14681 | 1148.401 | 15.25    |
| 15.5     | 1148.4   | 15.08   | 1148.402 | 15       | 1148.402 | 15.15    | 1148.401 | 15.25626 |
| 15.50451 | 1148.4   | 15.0858 | 1148.402 | 15.00382 | 1148.402 | 15.15681 | 1148.401 | 15.26    |
| 15.51    | 1148.4   | 15.09   | 1148.402 | 15.01    | 1148.402 | 15.16    | 1148.401 | 15.26626 |
| 15.51451 | 1148.4   | 15.0958 | 1148.402 | 15.01382 | 1148.402 | 15.16681 | 1148.401 | 15.27    |
| 15.52    | 1148.4   | 15.1    | 1148.402 | 15.02    | 1148.402 | 15.17    | 1148.401 | 15.27626 |
| 15.52451 | 1148.4   | 15.1058 | 1148.402 | 15.02382 | 1148.402 | 15.17681 | 1148.401 | 15.28    |
| 15.53    | 1148.4   | 15.11   | 1148.402 | 15.03    | 1148.402 | 15.18    | 1148.401 | 15.28626 |
| 15.53451 | 1148.4   | 15.1158 | 1148.402 | 15.03382 | 1148.402 | 15.18681 | 1148.401 | 15.29    |
| 15.54    | 1148.401 | 15.12   | 1148.402 | 15.04    | 1148.402 | 15.19    | 1148.401 | 15.29626 |
| 15.54451 | 1148.401 | 15.1258 | 1148.402 | 15.04382 | 1148.402 | 15.19681 | 1148.401 | 15.3     |
| 15.55    | 1148.401 | 15.13   | 1148.402 | 15.05    | 1148.402 | 15.2     | 1148.401 | 15.30626 |
| 15.55451 | 1148.401 | 15.1358 | 1148.402 | 15.05382 | 1148.402 | 15.20681 | 1148.401 | 15.31    |
| 15.56    | 1148.401 | 15.14   | 1148.402 | 15.06    | 1148.402 | 15.21    | 1148.401 | 15.31626 |
| 15.56451 | 1148.401 | 15.1458 | 1148.402 | 15.06382 | 1148.402 | 15.21681 | 1148.401 | 15.32    |
| 15.57    | 1148.401 | 15.15   | 1148.402 | 15.07    | 1148.402 | 15.22    | 1148.401 | 15.32626 |
| 15.57451 | 1148.401 | 15.1558 | 1148.402 | 15.07382 | 1148.402 | 15.22681 | 1148.401 | 15.33    |
| 15.58    | 1148.401 | 15.16   | 1148.402 | 15.08    | 1148.402 | 15.23    | 1148.401 | 15.33626 |
| 15.58451 | 1148.401 | 15.1658 | 1148.402 | 15.08382 | 1148.402 | 15.23681 | 1148.401 | 15.34    |
| 15.59    | 1148.401 | 15.17   | 1148.402 | 15.09    | 1148.402 | 15.24    | 1148.401 | 15.34626 |
| 15.59451 | 1148.401 | 15.1758 | 1148.402 | 15.09382 | 1148.402 | 15.24681 | 1148.401 | 15.35    |
| 15.6     | 1148.401 | 15.18   | 1148.402 | 15.1     | 1148.402 | 15.25    | 1148.401 | 15.35626 |
| 15.60451 | 1148.401 | 15.1858 | 1148.402 | 15.10382 | 1148.402 | 15.25681 | 1148.401 | 15.36    |

|          |          |         |          |          |          |          |          |          |
|----------|----------|---------|----------|----------|----------|----------|----------|----------|
| 15.61    | 1148.401 | 15.19   | 1148.402 | 15.11    | 1148.402 | 15.26    | 1148.401 | 15.36626 |
| 15.61451 | 1148.401 | 15.1958 | 1148.402 | 15.11382 | 1148.402 | 15.26681 | 1148.401 | 15.37    |
| 15.62    | 1148.401 | 15.2    | 1148.402 | 15.12    | 1148.402 | 15.27    | 1148.401 | 15.37626 |
| 15.62451 | 1148.401 | 15.2058 | 1148.402 | 15.12382 | 1148.402 | 15.27681 | 1148.401 | 15.38    |
| 15.63    | 1148.401 | 15.21   | 1148.402 | 15.13    | 1148.402 | 15.28    | 1148.401 | 15.38626 |
| 15.63451 | 1148.401 | 15.2158 | 1148.402 | 15.13382 | 1148.402 | 15.28681 | 1148.401 | 15.39    |
| 15.64    | 1148.401 | 15.22   | 1148.402 | 15.14    | 1148.402 | 15.29    | 1148.401 | 15.39626 |
| 15.64451 | 1148.401 | 15.2258 | 1148.402 | 15.14382 | 1148.402 | 15.29681 | 1148.401 | 15.4     |
| 15.65    | 1148.401 | 15.23   | 1148.402 | 15.15    | 1148.402 | 15.3     | 1148.401 | 15.40626 |
| 15.65451 | 1148.401 | 15.2358 | 1148.402 | 15.15382 | 1148.402 | 15.30681 | 1148.401 | 15.41    |
| 15.66    | 1148.401 | 15.24   | 1148.402 | 15.16    | 1148.402 | 15.31    | 1148.401 | 15.41626 |
| 15.66451 | 1148.401 | 15.2458 | 1148.402 | 15.16382 | 1148.402 | 15.31681 | 1148.401 | 15.42    |
| 15.67    | 1148.401 | 15.25   | 1148.402 | 15.17    | 1148.402 | 15.32    | 1148.401 | 15.42626 |
| 15.67451 | 1148.401 | 15.2558 | 1148.402 | 15.17382 | 1148.402 | 15.32681 | 1148.401 | 15.43    |
| 15.68    | 1148.401 | 15.26   | 1148.402 | 15.18    | 1148.402 | 15.33    | 1148.401 | 15.43626 |
| 15.68451 | 1148.401 | 15.2658 | 1148.402 | 15.18382 | 1148.402 | 15.33681 | 1148.401 | 15.44    |
| 15.69    | 1148.401 | 15.27   | 1148.402 | 15.19    | 1148.402 | 15.34    | 1148.401 | 15.44626 |
| 15.69451 | 1148.401 | 15.2758 | 1148.402 | 15.19382 | 1148.402 | 15.34681 | 1148.401 | 15.45    |
| 15.7     | 1148.401 | 15.28   | 1148.402 | 15.2     | 1148.402 | 15.35    | 1148.401 | 15.45626 |
| 15.70451 | 1148.401 | 15.2858 | 1148.402 | 15.20382 | 1148.402 | 15.35681 | 1148.401 | 15.46    |
| 15.71    | 1148.401 | 15.29   | 1148.402 | 15.21    | 1148.402 | 15.36    | 1148.401 | 15.46626 |
| 15.71451 | 1148.401 | 15.2958 | 1148.402 | 15.21382 | 1148.402 | 15.36681 | 1148.401 | 15.47    |
| 15.72    | 1148.401 | 15.3    | 1148.402 | 15.22    | 1148.402 | 15.37    | 1148.401 | 15.47626 |
| 15.72451 | 1148.401 | 15.3058 | 1148.402 | 15.22382 | 1148.402 | 15.37681 | 1148.401 | 15.48    |
| 15.73    | 1148.401 | 15.31   | 1148.402 | 15.23    | 1148.402 | 15.38    | 1148.401 | 15.48626 |
| 15.73451 | 1148.401 | 15.3158 | 1148.402 | 15.23382 | 1148.402 | 15.38681 | 1148.401 | 15.49    |
| 15.74    | 1148.401 | 15.32   | 1148.402 | 15.24    | 1148.402 | 15.39    | 1148.401 | 15.49626 |
| 15.74451 | 1148.401 | 15.3258 | 1148.402 | 15.24382 | 1148.402 | 15.39681 | 1148.401 | 15.5     |
| 15.75    | 1148.401 | 15.33   | 1148.402 | 15.25    | 1148.402 | 15.4     | 1148.401 | 15.50626 |
| 15.75451 | 1148.401 | 15.3358 | 1148.402 | 15.25382 | 1148.402 | 15.40681 | 1148.402 | 15.51    |
| 15.76    | 1148.401 | 15.34   | 1148.402 | 15.26    | 1148.402 | 15.41    | 1148.402 | 15.51626 |
| 15.76451 | 1148.401 | 15.3458 | 1148.402 | 15.26382 | 1148.402 | 15.41681 | 1148.402 | 15.52    |
| 15.77    | 1148.401 | 15.35   | 1148.402 | 15.27    | 1148.402 | 15.42    | 1148.402 | 15.52626 |
| 15.77451 | 1148.401 | 15.3558 | 1148.402 | 15.27382 | 1148.402 | 15.42681 | 1148.402 | 15.53    |
| 15.78    | 1148.401 | 15.36   | 1148.402 | 15.28    | 1148.402 | 15.43    | 1148.402 | 15.53626 |
| 15.78451 | 1148.401 | 15.3658 | 1148.402 | 15.28382 | 1148.402 | 15.43681 | 1148.402 | 15.54    |
| 15.79    | 1148.401 | 15.37   | 1148.402 | 15.29    | 1148.402 | 15.44    | 1148.402 | 15.54626 |
| 15.79451 | 1148.401 | 15.3758 | 1148.402 | 15.29382 | 1148.402 | 15.44681 | 1148.402 | 15.55    |
| 15.8     | 1148.401 | 15.38   | 1148.402 | 15.3     | 1148.402 | 15.45    | 1148.402 | 15.55626 |
| 15.80451 | 1148.401 | 15.3858 | 1148.402 | 15.30382 | 1148.402 | 15.45681 | 1148.402 | 15.56    |
| 15.81    | 1148.402 | 15.39   | 1148.402 | 15.31    | 1148.402 | 15.46    | 1148.402 | 15.56626 |
| 15.81451 | 1148.402 | 15.3958 | 1148.402 | 15.31382 | 1148.402 | 15.46681 | 1148.402 | 15.57    |
| 15.82    | 1148.402 | 15.4    | 1148.402 | 15.32    | 1148.402 | 15.47    | 1148.402 | 15.57626 |
| 15.82451 | 1148.402 | 15.4058 | 1148.402 | 15.32382 | 1148.402 | 15.47681 | 1148.402 | 15.58    |
| 15.83    | 1148.402 | 15.41   | 1148.402 | 15.33    | 1148.402 | 15.48    | 1148.402 | 15.58626 |
| 15.83451 | 1148.402 | 15.4158 | 1148.402 | 15.33382 | 1148.402 | 15.48681 | 1148.402 | 15.59    |
| 15.84    | 1148.402 | 15.42   | 1148.402 | 15.34    | 1148.402 | 15.49    | 1148.402 | 15.59626 |

|          |          |         |          |          |          |          |          |          |
|----------|----------|---------|----------|----------|----------|----------|----------|----------|
| 15.84451 | 1148.402 | 15.4258 | 1148.402 | 15.34382 | 1148.402 | 15.49681 | 1148.402 | 15.6     |
| 15.85    | 1148.402 | 15.43   | 1148.402 | 15.35    | 1148.402 | 15.5     | 1148.402 | 15.60626 |
| 15.85451 | 1148.402 | 15.4358 | 1148.402 | 15.35382 | 1148.402 | 15.50681 | 1148.402 | 15.61    |
| 15.86    | 1148.402 | 15.44   | 1148.402 | 15.36    | 1148.402 | 15.51    | 1148.402 | 15.61626 |
| 15.86451 | 1148.402 | 15.4458 | 1148.402 | 15.36382 | 1148.402 | 15.51681 | 1148.402 | 15.62    |
| 15.87    | 1148.402 | 15.45   | 1148.402 | 15.37    | 1148.402 | 15.52    | 1148.402 | 15.62626 |
| 15.87451 | 1148.402 | 15.4558 | 1148.402 | 15.37382 | 1148.402 | 15.52681 | 1148.402 | 15.63    |
| 15.88    | 1148.402 | 15.46   | 1148.402 | 15.38    | 1148.402 | 15.53    | 1148.402 | 15.63626 |
| 15.88451 | 1148.402 | 15.4658 | 1148.402 | 15.38382 | 1148.402 | 15.53681 | 1148.402 | 15.64    |
| 15.89    | 1148.402 | 15.47   | 1148.402 | 15.39    | 1148.402 | 15.54    | 1148.402 | 15.64626 |
| 15.89451 | 1148.402 | 15.4758 | 1148.402 | 15.39382 | 1148.402 | 15.54681 | 1148.402 | 15.65    |
| 15.9     | 1148.402 | 15.48   | 1148.402 | 15.4     | 1148.402 | 15.55    | 1148.402 | 15.65626 |
| 15.90451 | 1148.402 | 15.4858 | 1148.402 | 15.40382 | 1148.402 | 15.55681 | 1148.402 | 15.66    |
| 15.91    | 1148.402 | 15.49   | 1148.402 | 15.41    | 1148.402 | 15.56    | 1148.402 | 15.66626 |
| 15.91451 | 1148.402 | 15.4958 | 1148.402 | 15.41382 | 1148.402 | 15.56681 | 1148.402 | 15.67    |
| 15.92    | 1148.402 | 15.5    | 1148.402 | 15.42    | 1148.402 | 15.57    | 1148.402 | 15.67626 |
| 15.92451 | 1148.402 | 15.5058 | 1148.402 | 15.42382 | 1148.402 | 15.57681 | 1148.402 | 15.68    |
| 15.93    | 1148.402 | 15.51   | 1148.403 | 15.43    | 1148.402 | 15.58    | 1148.402 | 15.68626 |
| 15.93451 | 1148.402 | 15.5158 | 1148.403 | 15.43382 | 1148.402 | 15.58681 | 1148.402 | 15.69    |
| 15.94    | 1148.402 | 15.52   | 1148.403 | 15.44    | 1148.402 | 15.59    | 1148.402 | 15.69626 |
| 15.94451 | 1148.402 | 15.5258 | 1148.403 | 15.44382 | 1148.402 | 15.59681 | 1148.402 | 15.7     |
| 15.95    | 1148.402 | 15.53   | 1148.403 | 15.45    | 1148.402 | 15.6     | 1148.402 | 15.70626 |
| 15.95451 | 1148.402 | 15.5358 | 1148.403 | 15.45382 | 1148.402 | 15.60681 | 1148.402 | 15.71    |
| 15.96    | 1148.402 | 15.54   | 1148.403 | 15.46    | 1148.402 | 15.61    | 1148.402 | 15.71626 |
| 15.96451 | 1148.402 | 15.5458 | 1148.403 | 15.46382 | 1148.402 | 15.61681 | 1148.402 | 15.72    |
| 15.97    | 1148.402 | 15.55   | 1148.403 | 15.47    | 1148.402 | 15.62    | 1148.402 | 15.72626 |
| 15.97451 | 1148.402 | 15.5558 | 1148.403 | 15.47382 | 1148.402 | 15.62681 | 1148.402 | 15.73    |
| 15.98    | 1148.402 | 15.56   | 1148.403 | 15.48    | 1148.402 | 15.63    | 1148.402 | 15.73626 |
| 15.98451 | 1148.402 | 15.5658 | 1148.403 | 15.48382 | 1148.402 | 15.63681 | 1148.402 | 15.74    |
| 15.99    | 1148.402 | 15.57   | 1148.403 | 15.49    | 1148.402 | 15.64    | 1148.402 | 15.74626 |
| 15.99451 | 1148.402 | 15.5758 | 1148.403 | 15.49382 | 1148.402 | 15.64681 | 1148.402 | 15.75    |
| 16       | 1148.402 | 15.58   | 1148.403 | 15.5     | 1148.402 | 15.65    | 1148.402 | 15.75626 |
| 16.00451 | 1148.402 | 15.5858 | 1148.403 | 15.50382 | 1148.402 | 15.65681 | 1148.402 | 15.76    |
| 16.01    | 1148.402 | 15.59   | 1148.403 | 15.51    | 1148.402 | 15.66    | 1148.402 | 15.76626 |
| 16.01451 | 1148.402 | 15.5958 | 1148.403 | 15.51382 | 1148.402 | 15.66681 | 1148.402 | 15.77    |
| 16.02    | 1148.402 | 15.6    | 1148.403 | 15.52    | 1148.403 | 15.67    | 1148.402 | 15.77626 |
| 16.02451 | 1148.402 | 15.6058 | 1148.403 | 15.52382 | 1148.403 | 15.67681 | 1148.402 | 15.78    |
| 16.03    | 1148.402 | 15.61   | 1148.403 | 15.53    | 1148.403 | 15.68    | 1148.402 | 15.78626 |
| 16.03451 | 1148.402 | 15.6158 | 1148.403 | 15.53382 | 1148.403 | 15.68681 | 1148.402 | 15.79    |
| 16.04    | 1148.402 | 15.62   | 1148.403 | 15.54    | 1148.403 | 15.69    | 1148.402 | 15.79626 |
| 16.04451 | 1148.402 | 15.6258 | 1148.403 | 15.54382 | 1148.403 | 15.69681 | 1148.402 | 15.8     |
| 16.05    | 1148.402 | 15.63   | 1148.403 | 15.55    | 1148.403 | 15.7     | 1148.402 | 15.80626 |
| 16.05451 | 1148.402 | 15.6358 | 1148.403 | 15.55382 | 1148.403 | 15.70681 | 1148.402 | 15.81    |
| 16.06    | 1148.402 | 15.64   | 1148.403 | 15.56    | 1148.403 | 15.71    | 1148.402 | 15.81626 |
| 16.06451 | 1148.402 | 15.6458 | 1148.403 | 15.56382 | 1148.403 | 15.71681 | 1148.402 | 15.82    |
| 16.07    | 1148.402 | 15.65   | 1148.403 | 15.57    | 1148.403 | 15.72    | 1148.402 | 15.82626 |
| 16.07451 | 1148.402 | 15.6558 | 1148.403 | 15.57382 | 1148.403 | 15.72681 | 1148.402 | 15.83    |

|          |          |         |          |          |          |          |          |          |
|----------|----------|---------|----------|----------|----------|----------|----------|----------|
| 16.08    | 1148.402 | 15.66   | 1148.403 | 15.58    | 1148.403 | 15.73    | 1148.402 | 15.83626 |
| 16.08451 | 1148.402 | 15.6658 | 1148.403 | 15.58382 | 1148.403 | 15.73681 | 1148.402 | 15.84    |
| 16.09    | 1148.402 | 15.67   | 1148.403 | 15.59    | 1148.403 | 15.74    | 1148.402 | 15.84626 |
| 16.09451 | 1148.402 | 15.6758 | 1148.403 | 15.59382 | 1148.403 | 15.74681 | 1148.402 | 15.85    |
| 16.1     | 1148.402 | 15.68   | 1148.403 | 15.6     | 1148.403 | 15.75    | 1148.402 | 15.85626 |
| 16.10451 | 1148.402 | 15.6858 | 1148.403 | 15.60382 | 1148.403 | 15.75681 | 1148.402 | 15.86    |
| 16.11    | 1148.402 | 15.69   | 1148.403 | 15.61    | 1148.403 | 15.76    | 1148.402 | 15.86626 |
| 16.11451 | 1148.402 | 15.6958 | 1148.403 | 15.61382 | 1148.403 | 15.76681 | 1148.402 | 15.87    |
| 16.12    | 1148.402 | 15.7    | 1148.403 | 15.62    | 1148.403 | 15.77    | 1148.402 | 15.87626 |
| 16.12451 | 1148.402 | 15.7058 | 1148.403 | 15.62382 | 1148.403 | 15.77681 | 1148.402 | 15.88    |
| 16.13    | 1148.402 | 15.71   | 1148.403 | 15.63    | 1148.403 | 15.78    | 1148.402 | 15.88626 |
| 16.13451 | 1148.402 | 15.7158 | 1148.403 | 15.63382 | 1148.403 | 15.78681 | 1148.402 | 15.89    |
| 16.14    | 1148.402 | 15.72   | 1148.403 | 15.64    | 1148.403 | 15.79    | 1148.402 | 15.89626 |
| 16.14451 | 1148.402 | 15.7258 | 1148.403 | 15.64382 | 1148.403 | 15.79681 | 1148.402 | 15.9     |
| 16.15    | 1148.402 | 15.73   | 1148.403 | 15.65    | 1148.403 | 15.8     | 1148.402 | 15.90626 |
| 16.15451 | 1148.402 | 15.7358 | 1148.403 | 15.65382 | 1148.403 | 15.80681 | 1148.402 | 15.91    |
| 16.16    | 1148.402 | 15.74   | 1148.403 | 15.66    | 1148.403 | 15.81    | 1148.402 | 15.91626 |
| 16.16451 | 1148.402 | 15.7458 | 1148.403 | 15.66382 | 1148.403 | 15.81681 | 1148.402 | 15.92    |
| 16.17    | 1148.402 | 15.75   | 1148.403 | 15.67    | 1148.403 | 15.82    | 1148.402 | 15.92626 |
| 16.17451 | 1148.402 | 15.7558 | 1148.403 | 15.67382 | 1148.403 | 15.82681 | 1148.402 | 15.93    |
| 16.18    | 1148.402 | 15.76   | 1148.403 | 15.68    | 1148.403 | 15.83    | 1148.402 | 15.93626 |
| 16.18451 | 1148.402 | 15.7658 | 1148.403 | 15.68382 | 1148.403 | 15.83681 | 1148.402 | 15.94    |
| 16.19    | 1148.402 | 15.77   | 1148.403 | 15.69    | 1148.403 | 15.84    | 1148.402 | 15.94626 |
| 16.19451 | 1148.402 | 15.7758 | 1148.403 | 15.69382 | 1148.403 | 15.84681 | 1148.402 | 15.95    |
| 16.2     | 1148.402 | 15.78   | 1148.403 | 15.7     | 1148.403 | 15.85    | 1148.402 | 15.95626 |
| 16.20451 | 1148.402 | 15.7858 | 1148.403 | 15.70382 | 1148.403 | 15.85681 | 1148.402 | 15.96    |
| 16.21    | 1148.402 | 15.79   | 1148.403 | 15.71    | 1148.403 | 15.86    | 1148.402 | 15.96626 |
| 16.21451 | 1148.402 | 15.7958 | 1148.403 | 15.71382 | 1148.403 | 15.86681 | 1148.402 | 15.97    |
| 16.22    | 1148.402 | 15.8    | 1148.403 | 15.72    | 1148.403 | 15.87    | 1148.402 | 15.97626 |
| 16.22451 | 1148.402 | 15.8058 | 1148.403 | 15.72382 | 1148.403 | 15.87681 | 1148.402 | 15.98    |
| 16.23    | 1148.402 | 15.81   | 1148.403 | 15.73    | 1148.403 | 15.88    | 1148.402 | 15.98626 |
| 16.23451 | 1148.402 | 15.8158 | 1148.403 | 15.73382 | 1148.403 | 15.88681 | 1148.402 | 15.99    |
| 16.24    | 1148.402 | 15.82   | 1148.403 | 15.74    | 1148.403 | 15.89    | 1148.402 | 15.99626 |
| 16.24451 | 1148.402 | 15.8258 | 1148.403 | 15.74382 | 1148.403 | 15.89681 | 1148.402 | 16       |
| 16.25    | 1148.402 | 15.83   | 1148.403 | 15.75    | 1148.403 | 15.9     | 1148.402 | 16.00626 |
| 16.25451 | 1148.402 | 15.8358 | 1148.403 | 15.75382 | 1148.403 | 15.90681 | 1148.402 | 16.01    |
| 16.26    | 1148.402 | 15.84   | 1148.403 | 15.76    | 1148.403 | 15.91    | 1148.402 | 16.01626 |
| 16.26451 | 1148.402 | 15.8458 | 1148.403 | 15.76382 | 1148.403 | 15.91681 | 1148.402 | 16.02    |
| 16.27    | 1148.402 | 15.85   | 1148.403 | 15.77    | 1148.403 | 15.92    | 1148.402 | 16.02626 |
| 16.27451 | 1148.402 | 15.8558 | 1148.403 | 15.77382 | 1148.403 | 15.92681 | 1148.402 | 16.03    |
| 16.28    | 1148.402 | 15.86   | 1148.403 | 15.78    | 1148.403 | 15.93    | 1148.402 | 16.03626 |
| 16.28451 | 1148.402 | 15.8658 | 1148.403 | 15.78382 | 1148.403 | 15.93681 | 1148.402 | 16.04    |
| 16.29    | 1148.402 | 15.87   | 1148.403 | 15.79    | 1148.403 | 15.94    | 1148.402 | 16.04626 |
| 16.29451 | 1148.402 | 15.8758 | 1148.403 | 15.79382 | 1148.403 | 15.94681 | 1148.402 | 16.05    |
| 16.3     | 1148.402 | 15.88   | 1148.403 | 15.8     | 1148.403 | 15.95    | 1148.402 | 16.05626 |
| 16.30451 | 1148.402 | 15.8858 | 1148.403 | 15.80382 | 1148.403 | 15.95681 | 1148.402 | 16.06    |
| 16.31    | 1148.402 | 15.89   | 1148.403 | 15.81    | 1148.403 | 15.96    | 1148.402 | 16.06626 |



|          |          |         |          |          |          |          |          |          |
|----------|----------|---------|----------|----------|----------|----------|----------|----------|
| 16.31451 | 1148.402 | 15.8958 | 1148.403 | 15.81382 | 1148.403 | 15.96681 | 1148.402 | 16.07    |
| 16.32    | 1148.402 | 15.9    | 1148.403 | 15.82    | 1148.403 | 15.97    | 1148.402 | 16.07626 |
| 16.32451 | 1148.402 | 15.9058 | 1148.403 | 15.82382 | 1148.403 | 15.97681 | 1148.402 | 16.08    |
| 16.33    | 1148.402 | 15.91   | 1148.403 | 15.83    | 1148.403 | 15.98    | 1148.402 | 16.08626 |
| 16.33451 | 1148.402 | 15.9158 | 1148.403 | 15.83382 | 1148.403 | 15.98681 | 1148.402 | 16.09    |
| 16.34    | 1148.402 | 15.92   | 1148.403 | 15.84    | 1148.403 | 15.99    | 1148.402 | 16.09626 |
| 16.34451 | 1148.402 | 15.9258 | 1148.403 | 15.84382 | 1148.403 | 15.99681 | 1148.402 | 16.1     |
| 16.35    | 1148.402 | 15.93   | 1148.403 | 15.85    | 1148.403 | 16       | 1148.402 | 16.10626 |
| 16.35451 | 1148.402 | 15.9358 | 1148.403 | 15.85382 | 1148.403 | 16.00681 | 1148.403 | 16.11    |
| 16.36    | 1148.402 | 15.94   | 1148.403 | 15.86    | 1148.403 | 16.01    | 1148.403 | 16.11626 |
| 16.36451 | 1148.402 | 15.9458 | 1148.403 | 15.86382 | 1148.403 | 16.01681 | 1148.403 | 16.12    |
| 16.37    | 1148.402 | 15.95   | 1148.403 | 15.87    | 1148.403 | 16.02    | 1148.403 | 16.12626 |
| 16.37451 | 1148.402 | 15.9558 | 1148.403 | 15.87382 | 1148.403 | 16.02681 | 1148.403 | 16.13    |
| 16.38    | 1148.402 | 15.96   | 1148.403 | 15.88    | 1148.403 | 16.03    | 1148.403 | 16.13626 |
| 16.38451 | 1148.402 | 15.9658 | 1148.403 | 15.88382 | 1148.403 | 16.03681 | 1148.403 | 16.14    |
| 16.39    | 1148.402 | 15.97   | 1148.403 | 15.89    | 1148.403 | 16.04    | 1148.403 | 16.14626 |
| 16.39451 | 1148.402 | 15.9758 | 1148.403 | 15.89382 | 1148.403 | 16.04681 | 1148.403 | 16.15    |
| 16.4     | 1148.402 | 15.98   | 1148.403 | 15.9     | 1148.403 | 16.05    | 1148.403 | 16.15626 |
| 16.40451 | 1148.402 | 15.9858 | 1148.403 | 15.90382 | 1148.403 | 16.05681 | 1148.403 | 16.16    |
| 16.41    | 1148.402 | 15.99   | 1148.403 | 15.91    | 1148.403 | 16.06    | 1148.403 | 16.16626 |
| 16.41451 | 1148.403 | 15.9958 | 1148.403 | 15.91382 | 1148.403 | 16.06681 | 1148.403 | 16.17    |
| 16.42    | 1148.403 | 16      | 1148.403 | 15.92    | 1148.403 | 16.07    | 1148.403 | 16.17626 |
| 16.42451 | 1148.403 | 16.0058 | 1148.403 | 15.92382 | 1148.403 | 16.07681 | 1148.403 | 16.18    |
| 16.43    | 1148.403 | 16.01   | 1148.403 | 15.93    | 1148.403 | 16.08    | 1148.403 | 16.18626 |
| 16.43451 | 1148.403 | 16.0158 | 1148.403 | 15.93382 | 1148.403 | 16.08681 | 1148.403 | 16.19    |
| 16.44    | 1148.403 | 16.02   | 1148.403 | 15.94    | 1148.403 | 16.09    | 1148.403 | 16.19626 |
| 16.44451 | 1148.403 | 16.0258 | 1148.403 | 15.94382 | 1148.403 | 16.09681 | 1148.403 | 16.2     |
| 16.45    | 1148.403 | 16.03   | 1148.403 | 15.95    | 1148.403 | 16.1     | 1148.403 | 16.20626 |
| 16.45451 | 1148.403 | 16.0358 | 1148.403 | 15.95382 | 1148.403 | 16.10681 | 1148.403 | 16.21    |
| 16.46    | 1148.403 | 16.04   | 1148.403 | 15.96    | 1148.403 | 16.11    | 1148.403 | 16.21626 |
| 16.46451 | 1148.403 | 16.0458 | 1148.403 | 15.96382 | 1148.403 | 16.11681 | 1148.403 | 16.22    |
| 16.47    | 1148.403 | 16.05   | 1148.403 | 15.97    | 1148.403 | 16.12    | 1148.403 | 16.22626 |
| 16.47451 | 1148.403 | 16.0558 | 1148.403 | 15.97382 | 1148.403 | 16.12681 | 1148.403 | 16.23    |
| 16.48    | 1148.403 | 16.06   | 1148.403 | 15.98    | 1148.403 | 16.13    | 1148.403 | 16.23626 |
| 16.48451 | 1148.403 | 16.0658 | 1148.403 | 15.98382 | 1148.403 | 16.13681 | 1148.403 | 16.24    |
| 16.49    | 1148.403 | 16.07   | 1148.403 | 15.99    | 1148.403 | 16.14    | 1148.403 | 16.24626 |
| 16.49451 | 1148.403 | 16.0758 | 1148.403 | 15.99382 | 1148.403 | 16.14681 | 1148.403 | 16.25    |
| 16.5     | 1148.403 | 16.08   | 1148.403 | 16       | 1148.403 | 16.15    | 1148.403 | 16.25626 |
| 16.50451 | 1148.403 | 16.0858 | 1148.403 | 16.00382 | 1148.403 | 16.15681 | 1148.403 | 16.26    |
| 16.51    | 1148.403 | 16.09   | 1148.403 | 16.01    | 1148.403 | 16.16    | 1148.403 | 16.26626 |
| 16.51451 | 1148.403 | 16.0958 | 1148.403 | 16.01382 | 1148.403 | 16.16681 | 1148.403 | 16.27    |
| 16.52    | 1148.403 | 16.1    | 1148.403 | 16.02    | 1148.403 | 16.17    | 1148.403 | 16.27626 |
| 16.52451 | 1148.403 | 16.1058 | 1148.403 | 16.02382 | 1148.403 | 16.17681 | 1148.403 | 16.28    |
| 16.53    | 1148.403 | 16.11   | 1148.403 | 16.03    | 1148.403 | 16.18    | 1148.403 | 16.28626 |
| 16.53451 | 1148.403 | 16.1158 | 1148.403 | 16.03382 | 1148.403 | 16.18681 | 1148.403 | 16.29    |
| 16.54    | 1148.403 | 16.12   | 1148.403 | 16.04    | 1148.403 | 16.19    | 1148.403 | 16.29626 |
| 16.54451 | 1148.403 | 16.1258 | 1148.403 | 16.04382 | 1148.403 | 16.19681 | 1148.403 | 16.3     |

|          |          |         |          |          |          |          |          |          |
|----------|----------|---------|----------|----------|----------|----------|----------|----------|
| 16.55    | 1148.403 | 16.13   | 1148.403 | 16.05    | 1148.403 | 16.2     | 1148.403 | 16.30626 |
| 16.55451 | 1148.403 | 16.1358 | 1148.403 | 16.05382 | 1148.403 | 16.20681 | 1148.403 | 16.31    |
| 16.56    | 1148.403 | 16.14   | 1148.403 | 16.06    | 1148.403 | 16.21    | 1148.403 | 16.31626 |
| 16.56451 | 1148.403 | 16.1458 | 1148.403 | 16.06382 | 1148.403 | 16.21681 | 1148.403 | 16.32    |
| 16.57    | 1148.403 | 16.15   | 1148.403 | 16.07    | 1148.403 | 16.22    | 1148.403 | 16.32626 |
| 16.57451 | 1148.403 | 16.1558 | 1148.403 | 16.07382 | 1148.403 | 16.22681 | 1148.403 | 16.33    |
| 16.58    | 1148.403 | 16.16   | 1148.403 | 16.08    | 1148.403 | 16.23    | 1148.403 | 16.33626 |
| 16.58451 | 1148.403 | 16.1658 | 1148.403 | 16.08382 | 1148.403 | 16.23681 | 1148.403 | 16.34    |
| 16.59    | 1148.403 | 16.17   | 1148.403 | 16.09    | 1148.403 | 16.24    | 1148.403 | 16.34626 |
| 16.59451 | 1148.403 | 16.1758 | 1148.403 | 16.09382 | 1148.403 | 16.24681 | 1148.403 | 16.35    |
| 16.6     | 1148.403 | 16.18   | 1148.403 | 16.1     | 1148.403 | 16.25    | 1148.403 | 16.35626 |
| 16.60451 | 1148.403 | 16.1858 | 1148.403 | 16.10382 | 1148.403 | 16.25681 | 1148.403 | 16.36    |
| 16.61    | 1148.403 | 16.19   | 1148.403 | 16.11    | 1148.403 | 16.26    | 1148.403 | 16.36626 |
| 16.61451 | 1148.403 | 16.1958 | 1148.403 | 16.11382 | 1148.403 | 16.26681 | 1148.403 | 16.37    |
| 16.62    | 1148.403 | 16.2    | 1148.403 | 16.12    | 1148.403 | 16.27    | 1148.403 | 16.37626 |
| 16.62451 | 1148.403 | 16.2058 | 1148.403 | 16.12382 | 1148.403 | 16.27681 | 1148.403 | 16.38    |
| 16.63    | 1148.403 | 16.21   | 1148.403 | 16.13    | 1148.403 | 16.28    | 1148.403 | 16.38626 |
| 16.63451 | 1148.403 | 16.2158 | 1148.403 | 16.13382 | 1148.403 | 16.28681 | 1148.403 | 16.39    |
| 16.64    | 1148.403 | 16.22   | 1148.403 | 16.14    | 1148.403 | 16.29    | 1148.403 | 16.39626 |
| 16.64451 | 1148.403 | 16.2258 | 1148.403 | 16.14382 | 1148.403 | 16.29681 | 1148.403 | 16.4     |
| 16.65    | 1148.403 | 16.23   | 1148.403 | 16.15    | 1148.403 | 16.3     | 1148.403 | 16.40626 |
| 16.65451 | 1148.403 | 16.2358 | 1148.403 | 16.15382 | 1148.403 | 16.30681 | 1148.403 | 16.41    |
| 16.66    | 1148.403 | 16.24   | 1148.403 | 16.16    | 1148.403 | 16.31    | 1148.403 | 16.41626 |
| 16.66451 | 1148.403 | 16.2458 | 1148.403 | 16.16382 | 1148.403 | 16.31681 | 1148.403 | 16.42    |
| 16.67    | 1148.403 | 16.25   | 1148.403 | 16.17    | 1148.403 | 16.32    | 1148.403 | 16.42626 |
| 16.67451 | 1148.403 | 16.2558 | 1148.403 | 16.17382 | 1148.403 | 16.32681 | 1148.403 | 16.43    |
| 16.68    | 1148.403 | 16.26   | 1148.403 | 16.18    | 1148.403 | 16.33    | 1148.403 | 16.43626 |
| 16.68451 | 1148.403 | 16.2658 | 1148.403 | 16.18382 | 1148.403 | 16.33681 | 1148.403 | 16.44    |
| 16.69    | 1148.403 | 16.27   | 1148.403 | 16.19    | 1148.403 | 16.34    | 1148.403 | 16.44626 |
| 16.69451 | 1148.403 | 16.2758 | 1148.403 | 16.19382 | 1148.403 | 16.34681 | 1148.403 | 16.45    |
| 16.7     | 1148.403 | 16.28   | 1148.403 | 16.2     | 1148.403 | 16.35    | 1148.403 | 16.45626 |
| 16.70451 | 1148.403 | 16.2858 | 1148.403 | 16.20382 | 1148.403 | 16.35681 | 1148.403 | 16.46    |
| 16.71    | 1148.403 | 16.29   | 1148.403 | 16.21    | 1148.403 | 16.36    | 1148.403 | 16.46626 |
| 16.71451 | 1148.403 | 16.2958 | 1148.403 | 16.21382 | 1148.403 | 16.36681 | 1148.403 | 16.47    |
| 16.72    | 1148.403 | 16.3    | 1148.403 | 16.22    | 1148.403 | 16.37    | 1148.403 | 16.47626 |
| 16.72451 | 1148.403 | 16.3058 | 1148.403 | 16.22382 | 1148.403 | 16.37681 | 1148.403 | 16.48    |
| 16.73    | 1148.403 | 16.31   | 1148.403 | 16.23    | 1148.403 | 16.38    | 1148.403 | 16.48626 |
| 16.73451 | 1148.403 | 16.3158 | 1148.403 | 16.23382 | 1148.403 | 16.38681 | 1148.403 | 16.49    |
| 16.74    | 1148.403 | 16.32   | 1148.403 | 16.24    | 1148.403 | 16.39    | 1148.403 | 16.49626 |
| 16.74451 | 1148.403 | 16.3258 | 1148.403 | 16.24382 | 1148.403 | 16.39681 | 1148.403 | 16.5     |
| 16.75    | 1148.403 | 16.33   | 1148.403 | 16.25    | 1148.403 | 16.4     | 1148.403 | 16.50626 |
| 16.75451 | 1148.403 | 16.3358 | 1148.403 | 16.25382 | 1148.403 | 16.40681 | 1148.403 | 16.51    |
| 16.76    | 1148.403 | 16.34   | 1148.403 | 16.26    | 1148.403 | 16.41    | 1148.403 | 16.51626 |
| 16.76451 | 1148.403 | 16.3458 | 1148.403 | 16.26382 | 1148.403 | 16.41681 | 1148.403 | 16.52    |
| 16.77    | 1148.403 | 16.35   | 1148.403 | 16.27    | 1148.403 | 16.42    | 1148.403 | 16.52626 |
| 16.77451 | 1148.403 | 16.3558 | 1148.403 | 16.27382 | 1148.403 | 16.42681 | 1148.403 | 16.53    |
| 16.78    | 1148.403 | 16.36   | 1148.403 | 16.28    | 1148.403 | 16.43    | 1148.403 | 16.53626 |

|          |          |         |          |          |          |          |          |          |
|----------|----------|---------|----------|----------|----------|----------|----------|----------|
| 16.78451 | 1148.403 | 16.3658 | 1148.403 | 16.28382 | 1148.403 | 16.43681 | 1148.403 | 16.54    |
| 16.79    | 1148.403 | 16.37   | 1148.403 | 16.29    | 1148.403 | 16.44    | 1148.403 | 16.54626 |
| 16.79451 | 1148.403 | 16.3758 | 1148.403 | 16.29382 | 1148.403 | 16.44681 | 1148.403 | 16.55    |
| 16.8     | 1148.403 | 16.38   | 1148.403 | 16.3     | 1148.403 | 16.45    | 1148.403 | 16.55626 |
| 16.80451 | 1148.403 | 16.3858 | 1148.403 | 16.30382 | 1148.403 | 16.45681 | 1148.403 | 16.56    |
| 16.81    | 1148.403 | 16.39   | 1148.403 | 16.31    | 1148.403 | 16.46    | 1148.403 | 16.56626 |
| 16.81451 | 1148.403 | 16.3958 | 1148.403 | 16.31382 | 1148.403 | 16.46681 | 1148.403 | 16.57    |
| 16.82    | 1148.403 | 16.4    | 1148.403 | 16.32    | 1148.403 | 16.47    | 1148.403 | 16.57626 |
| 16.82451 | 1148.403 | 16.4058 | 1148.403 | 16.32382 | 1148.403 | 16.47681 | 1148.403 | 16.58    |
| 16.83    | 1148.403 | 16.41   | 1148.403 | 16.33    | 1148.403 | 16.48    | 1148.403 | 16.58626 |
| 16.83451 | 1148.403 | 16.4158 | 1148.403 | 16.33382 | 1148.403 | 16.48681 | 1148.403 | 16.59    |
| 16.84    | 1148.403 | 16.42   | 1148.403 | 16.34    | 1148.403 | 16.49    | 1148.403 | 16.59626 |
| 16.84451 | 1148.403 | 16.4258 | 1148.403 | 16.34382 | 1148.403 | 16.49681 | 1148.403 | 16.6     |
| 16.85    | 1148.403 | 16.43   | 1148.403 | 16.35    | 1148.403 | 16.5     | 1148.403 | 16.60626 |
| 16.85451 | 1148.403 | 16.4358 | 1148.403 | 16.35382 | 1148.403 | 16.50681 | 1148.403 | 16.61    |
| 16.86    | 1148.403 | 16.44   | 1148.403 | 16.36    | 1148.403 | 16.51    | 1148.403 | 16.61626 |
| 16.86451 | 1148.403 | 16.4458 | 1148.403 | 16.36382 | 1148.403 | 16.51681 | 1148.403 | 16.62    |
| 16.87    | 1148.403 | 16.45   | 1148.403 | 16.37    | 1148.403 | 16.52    | 1148.403 | 16.62626 |
| 16.87451 | 1148.403 | 16.4558 | 1148.403 | 16.37382 | 1148.403 | 16.52681 | 1148.403 | 16.63    |
| 16.88    | 1148.403 | 16.46   | 1148.403 | 16.38    | 1148.403 | 16.53    | 1148.403 | 16.63626 |
| 16.88451 | 1148.403 | 16.4658 | 1148.403 | 16.38382 | 1148.403 | 16.53681 | 1148.403 | 16.64    |
| 16.89    | 1148.403 | 16.47   | 1148.403 | 16.39    | 1148.403 | 16.54    | 1148.403 | 16.64626 |
| 16.89451 | 1148.403 | 16.4758 | 1148.403 | 16.39382 | 1148.403 | 16.54681 | 1148.403 | 16.65    |
| 16.9     | 1148.403 | 16.48   | 1148.403 | 16.4     | 1148.403 | 16.55    | 1148.403 | 16.65626 |
| 16.90451 | 1148.403 | 16.4858 | 1148.403 | 16.40382 | 1148.403 | 16.55681 | 1148.403 | 16.66    |
| 16.91    | 1148.403 | 16.49   | 1148.403 | 16.41    | 1148.403 | 16.56    | 1148.403 | 16.66626 |
| 16.91451 | 1148.403 | 16.4958 | 1148.403 | 16.41382 | 1148.403 | 16.56681 | 1148.403 | 16.67    |
| 16.92    | 1148.403 | 16.5    | 1148.403 | 16.42    | 1148.403 | 16.57    | 1148.403 | 16.67626 |
| 16.92451 | 1148.403 | 16.5058 | 1148.403 | 16.42382 | 1148.403 | 16.57681 | 1148.403 | 16.68    |
| 16.93    | 1148.403 | 16.51   | 1148.403 | 16.43    | 1148.403 | 16.58    | 1148.403 | 16.68626 |
| 16.93451 | 1148.403 | 16.5158 | 1148.403 | 16.43382 | 1148.403 | 16.58681 | 1148.403 | 16.69    |
| 16.94    | 1148.403 | 16.52   | 1148.403 | 16.44    | 1148.403 | 16.59    | 1148.403 | 16.69626 |
| 16.94451 | 1148.403 | 16.5258 | 1148.403 | 16.44382 | 1148.403 | 16.59681 | 1148.403 | 16.7     |
| 16.95    | 1148.403 | 16.53   | 1148.403 | 16.45    | 1148.403 | 16.6     | 1148.403 | 16.70626 |
| 16.95451 | 1148.403 | 16.5358 | 1148.403 | 16.45382 | 1148.403 | 16.60681 | 1148.403 | 16.71    |
| 16.96    | 1148.403 | 16.54   | 1148.403 | 16.46    | 1148.403 | 16.61    | 1148.403 | 16.71626 |
| 16.96451 | 1148.403 | 16.5458 | 1148.403 | 16.46382 | 1148.403 | 16.61681 | 1148.403 | 16.72    |
| 16.97    | 1148.403 | 16.55   | 1148.403 | 16.47    | 1148.403 | 16.62    | 1148.403 | 16.72626 |
| 16.97451 | 1148.403 | 16.5558 | 1148.403 | 16.47382 | 1148.403 | 16.62681 | 1148.403 | 16.73    |
| 16.98    | 1148.403 | 16.56   | 1148.403 | 16.48    | 1148.403 | 16.63    | 1148.403 | 16.73626 |
| 16.98451 | 1148.403 | 16.5658 | 1148.403 | 16.48382 | 1148.403 | 16.63681 | 1148.403 | 16.74    |
| 16.99    | 1148.403 | 16.57   | 1148.403 | 16.49    | 1148.403 | 16.64    | 1148.403 | 16.74626 |
| 16.99451 | 1148.403 | 16.5758 | 1148.403 | 16.49382 | 1148.403 | 16.64681 | 1148.403 | 16.75    |
| 17       | 1148.403 | 16.58   | 1148.403 | 16.5     | 1148.403 | 16.65    | 1148.403 | 16.75626 |
| 17.00451 | 1148.403 | 16.5858 | 1148.403 | 16.50382 | 1148.403 | 16.65681 | 1148.403 | 16.76    |
| 17.01    | 1148.403 | 16.59   | 1148.403 | 16.51    | 1148.403 | 16.66    | 1148.403 | 16.76626 |
| 17.01451 | 1148.403 | 16.5958 | 1148.403 | 16.51382 | 1148.403 | 16.66681 | 1148.403 | 16.77    |

|          |          |         |          |          |          |          |          |          |
|----------|----------|---------|----------|----------|----------|----------|----------|----------|
| 17.02    | 1148.403 | 16.6    | 1148.403 | 16.52    | 1148.403 | 16.67    | 1148.403 | 16.77626 |
| 17.02451 | 1148.403 | 16.6058 | 1148.403 | 16.52382 | 1148.403 | 16.67681 | 1148.403 | 16.78    |
| 17.03    | 1148.403 | 16.61   | 1148.403 | 16.53    | 1148.403 | 16.68    | 1148.403 | 16.78626 |
| 17.03451 | 1148.403 | 16.6158 | 1148.403 | 16.53382 | 1148.403 | 16.68681 | 1148.403 | 16.79    |
| 17.04    | 1148.403 | 16.62   | 1148.403 | 16.54    | 1148.403 | 16.69    | 1148.403 | 16.79626 |
| 17.04451 | 1148.403 | 16.6258 | 1148.403 | 16.54382 | 1148.403 | 16.69681 | 1148.403 | 16.8     |
| 17.05    | 1148.403 | 16.63   | 1148.403 | 16.55    | 1148.403 | 16.7     | 1148.403 | 16.80626 |
| 17.05451 | 1148.403 | 16.6358 | 1148.403 | 16.55382 | 1148.403 | 16.70681 | 1148.403 | 16.81    |
| 17.06    | 1148.403 | 16.64   | 1148.403 | 16.56    | 1148.403 | 16.71    | 1148.403 | 16.81626 |
| 17.06451 | 1148.403 | 16.6458 | 1148.403 | 16.56382 | 1148.403 | 16.71681 | 1148.403 | 16.82    |
| 17.07    | 1148.403 | 16.65   | 1148.403 | 16.57    | 1148.403 | 16.72    | 1148.403 | 16.82626 |
| 17.07451 | 1148.403 | 16.6558 | 1148.403 | 16.57382 | 1148.403 | 16.72681 | 1148.403 | 16.83    |
| 17.08    | 1148.403 | 16.66   | 1148.403 | 16.58    | 1148.403 | 16.73    | 1148.403 | 16.83626 |
| 17.08451 | 1148.403 | 16.6658 | 1148.403 | 16.58382 | 1148.403 | 16.73681 | 1148.403 | 16.84    |
| 17.09    | 1148.403 | 16.67   | 1148.403 | 16.59    | 1148.403 | 16.74    | 1148.403 | 16.84626 |
| 17.09451 | 1148.403 | 16.6758 | 1148.403 | 16.59382 | 1148.403 | 16.74681 | 1148.403 | 16.85    |
| 17.1     | 1148.403 | 16.68   | 1148.403 | 16.6     | 1148.403 | 16.75    | 1148.403 | 16.85626 |
| 17.10451 | 1148.403 | 16.6858 | 1148.403 | 16.60382 | 1148.403 | 16.75681 | 1148.403 | 16.86    |
| 17.11    | 1148.403 | 16.69   | 1148.403 | 16.61    | 1148.403 | 16.76    | 1148.403 | 16.86626 |
| 17.11451 | 1148.403 | 16.6958 | 1148.403 | 16.61382 | 1148.403 | 16.76681 | 1148.403 | 16.87    |
| 17.12    | 1148.403 | 16.7    | 1148.403 | 16.62    | 1148.403 | 16.77    | 1148.403 | 16.87626 |
| 17.12451 | 1148.403 | 16.7058 | 1148.403 | 16.62382 | 1148.403 | 16.77681 | 1148.403 | 16.88    |
| 17.13    | 1148.403 | 16.71   | 1148.403 | 16.63    | 1148.403 | 16.78    | 1148.403 | 16.88626 |
| 17.13451 | 1148.403 | 16.7158 | 1148.403 | 16.63382 | 1148.403 | 16.78681 | 1148.403 | 16.89    |
| 17.14    | 1148.403 | 16.72   | 1148.403 | 16.64    | 1148.403 | 16.79    | 1148.403 | 16.89626 |
| 17.14451 | 1148.403 | 16.7258 | 1148.403 | 16.64382 | 1148.403 | 16.79681 | 1148.403 | 16.9     |
| 17.15    | 1148.403 | 16.73   | 1148.403 | 16.65    | 1148.403 | 16.8     | 1148.403 | 16.90626 |
| 17.15451 | 1148.403 | 16.7358 | 1148.403 | 16.65382 | 1148.403 | 16.80681 | 1148.403 | 16.91    |
| 17.16    | 1148.403 | 16.74   | 1148.403 | 16.66    | 1148.403 | 16.81    | 1148.403 | 16.91626 |
| 17.16451 | 1148.403 | 16.7458 | 1148.403 | 16.66382 | 1148.403 | 16.81641 | 1148.403 | 16.92    |
| 17.17    | 1148.403 | 16.75   | 1148.403 | 16.67    | 1148.403 | 16.81768 | 1148.403 | 16.92626 |
| 17.17451 | 1148.403 | 16.7558 | 1148.403 | 16.67382 | 1148.403 | 16.82    | 1148.403 | 16.93    |
| 17.18    | 1148.403 | 16.76   | 1148.403 | 16.68    | 1148.403 | 16.82618 | 1148.403 | 16.93626 |
| 17.18451 | 1148.403 | 16.7658 | 1148.403 | 16.68382 | 1148.403 | 16.83    | 1148.403 | 16.94    |
| 17.19    | 1148.403 | 16.77   | 1148.403 | 16.69    | 1148.403 | 16.83607 | 1148.403 | 16.94626 |
| 17.19451 | 1148.403 | 16.7758 | 1148.403 | 16.69382 | 1148.403 | 16.84    | 1148.403 | 16.95    |
| 17.2     | 1148.403 | 16.78   | 1148.403 | 16.7     | 1148.403 | 16.84607 | 1148.403 | 16.95626 |
| 17.20451 | 1148.403 | 16.7858 | 1148.403 | 16.70382 | 1148.403 | 16.85    | 1148.403 | 16.96    |
| 17.21    | 1148.403 | 16.79   | 1148.403 | 16.71    | 1148.403 | 16.85607 | 1148.403 | 16.96626 |
| 17.21451 | 1148.403 | 16.7958 | 1148.403 | 16.71382 | 1148.403 | 16.86    | 1148.403 | 16.97    |
| 17.22    | 1148.403 | 16.8    | 1148.403 | 16.72    | 1148.403 | 16.86607 | 1148.403 | 16.97626 |
| 17.22451 | 1148.403 | 16.8058 | 1148.403 | 16.72382 | 1148.403 | 16.87    | 1148.403 | 16.98    |
| 17.23    | 1148.403 | 16.81   | 1148.403 | 16.73    | 1148.403 | 16.87607 | 1148.403 | 16.98626 |
| 17.23451 | 1148.403 | 16.8158 | 1148.403 | 16.73382 | 1148.403 | 16.88    | 1148.403 | 16.99    |
| 17.24    | 1148.403 | 16.82   | 1148.403 | 16.74    | 1148.403 | 16.88607 | 1148.403 | 16.99626 |
| 17.24451 | 1148.403 | 16.8258 | 1148.403 | 16.74382 | 1148.403 | 16.89    | 1148.403 | 17       |
| 17.25    | 1148.403 | 16.83   | 1148.403 | 16.75    | 1148.403 | 16.89607 | 1148.403 | 17.00626 |

|          |          |         |          |          |          |          |          |          |
|----------|----------|---------|----------|----------|----------|----------|----------|----------|
| 17.25451 | 1148.403 | 16.8358 | 1148.403 | 16.75382 | 1148.403 | 16.9     | 1148.403 | 17.01    |
| 17.26    | 1148.403 | 16.84   | 1148.403 | 16.76    | 1148.403 | 16.90607 | 1148.403 | 17.01626 |
| 17.26451 | 1148.403 | 16.8458 | 1148.403 | 16.76382 | 1148.403 | 16.91    | 1148.403 | 17.02    |
| 17.27    | 1148.403 | 16.85   | 1148.403 | 16.77    | 1148.403 | 16.91607 | 1148.403 | 17.02626 |
| 17.27451 | 1148.403 | 16.8558 | 1148.403 | 16.77382 | 1148.403 | 16.92    | 1148.403 | 17.03    |
| 17.28    | 1148.403 | 16.86   | 1148.403 | 16.78    | 1148.403 | 16.92607 | 1148.403 | 17.03626 |
| 17.28451 | 1148.403 | 16.8658 | 1148.403 | 16.78382 | 1148.403 | 16.93    | 1148.403 | 17.04    |
| 17.29    | 1148.403 | 16.87   | 1148.403 | 16.79    | 1148.403 | 16.93607 | 1148.403 | 17.04626 |
| 17.29451 | 1148.403 | 16.8758 | 1148.403 | 16.79382 | 1148.403 | 16.94    | 1148.403 | 17.05    |
| 17.3     | 1148.403 | 16.88   | 1148.403 | 16.8     | 1148.403 | 16.94607 | 1148.403 | 17.05626 |
| 17.30451 | 1148.403 | 16.8858 | 1148.403 | 16.80382 | 1148.403 | 16.95    | 1148.403 | 17.06    |
| 17.31    | 1148.403 | 16.89   | 1148.403 | 16.81    | 1148.403 | 16.95607 | 1148.403 | 17.06626 |
| 17.31451 | 1148.403 | 16.8958 | 1148.403 | 16.81382 | 1148.403 | 16.96    | 1148.403 | 17.07    |
| 17.32    | 1148.403 | 16.9    | 1148.403 | 16.82    | 1148.403 | 16.96607 | 1148.403 | 17.07626 |
| 17.32451 | 1148.403 | 16.9058 | 1148.403 | 16.82382 | 1148.403 | 16.97    | 1148.403 | 17.08    |
| 17.33    | 1148.403 | 16.91   | 1148.403 | 16.83    | 1148.403 | 16.97607 | 1148.403 | 17.08626 |
| 17.33451 | 1148.403 | 16.9158 | 1148.403 | 16.83382 | 1148.403 | 16.98    | 1148.403 | 17.09    |
| 17.34    | 1148.403 | 16.92   | 1148.403 | 16.84    | 1148.403 | 16.98607 | 1148.403 | 17.09626 |
| 17.34451 | 1148.403 | 16.9258 | 1148.403 | 16.84382 | 1148.403 | 16.99    | 1148.403 | 17.1     |
| 17.35    | 1148.403 | 16.93   | 1148.403 | 16.85    | 1148.403 | 16.99607 | 1148.403 | 17.10626 |
| 17.35451 | 1148.403 | 16.9358 | 1148.403 | 16.85382 | 1148.403 | 17       | 1148.403 | 17.11    |
| 17.36    | 1148.403 | 16.94   | 1148.403 | 16.86    | 1148.403 | 17.00607 | 1148.403 | 17.11626 |
| 17.36451 | 1148.403 | 16.9458 | 1148.403 | 16.86382 | 1148.403 | 17.01    | 1148.403 | 17.12    |
| 17.37    | 1148.403 | 16.95   | 1148.403 | 16.87    | 1148.403 | 17.01607 | 1148.403 | 17.12626 |
| 17.37451 | 1148.403 | 16.9558 | 1148.403 | 16.87382 | 1148.403 | 17.02    | 1148.403 | 17.13    |
| 17.38    | 1148.403 | 16.96   | 1148.403 | 16.88    | 1148.403 | 17.02607 | 1148.403 | 17.13626 |
| 17.38451 | 1148.403 | 16.9658 | 1148.403 | 16.88382 | 1148.403 | 17.03    | 1148.403 | 17.14    |
| 17.39    | 1148.403 | 16.97   | 1148.403 | 16.89    | 1148.403 | 17.03607 | 1148.403 | 17.14626 |
| 17.39451 | 1148.403 | 16.9758 | 1148.403 | 16.89382 | 1148.403 | 17.04    | 1148.403 | 17.15    |
| 17.4     | 1148.403 | 16.98   | 1148.403 | 16.9     | 1148.403 | 17.04607 | 1148.403 | 17.15626 |
| 17.40451 | 1148.403 | 16.9858 | 1148.403 | 16.90382 | 1148.403 | 17.05    | 1148.403 | 17.16    |
| 17.41    | 1148.403 | 16.99   | 1148.403 | 16.91    | 1148.403 | 17.05607 | 1148.403 | 17.16626 |
| 17.41451 | 1148.403 | 16.9958 | 1148.403 | 16.91382 | 1148.403 | 17.06    | 1148.403 | 17.17    |
| 17.42    | 1148.403 | 17      | 1148.403 | 16.92    | 1148.403 | 17.06607 | 1148.403 | 17.17626 |
| 17.42451 | 1148.403 | 17.0058 | 1148.403 | 16.92382 | 1148.403 | 17.07    | 1148.403 | 17.18    |
| 17.43    | 1148.403 | 17.01   | 1148.403 | 16.93    | 1148.403 | 17.07607 | 1148.403 | 17.18626 |
| 17.43451 | 1148.403 | 17.0158 | 1148.403 | 16.93382 | 1148.403 | 17.08    | 1148.403 | 17.19    |
| 17.44    | 1148.403 | 17.02   | 1148.403 | 16.94    | 1148.403 | 17.08607 | 1148.403 | 17.19626 |
| 17.44451 | 1148.403 | 17.0258 | 1148.403 | 16.94382 | 1148.403 | 17.09    | 1148.403 | 17.2     |
| 17.45    | 1148.403 | 17.03   | 1148.403 | 16.95    | 1148.403 | 17.09607 | 1148.403 | 17.20626 |
| 17.45451 | 1148.403 | 17.0358 | 1148.403 | 16.95382 | 1148.403 | 17.1     | 1148.403 | 17.21    |
| 17.46    | 1148.403 | 17.04   | 1148.403 | 16.96    | 1148.403 | 17.10607 | 1148.403 | 17.21626 |
| 17.46451 | 1148.403 | 17.0458 | 1148.403 | 16.96382 | 1148.403 | 17.11    | 1148.403 | 17.22    |
| 17.47    | 1148.403 | 17.05   | 1148.403 | 16.97    | 1148.403 | 17.11607 | 1148.403 | 17.22626 |
| 17.47451 | 1148.403 | 17.0558 | 1148.403 | 16.97382 | 1148.403 | 17.12    | 1148.403 | 17.23    |
| 17.48    | 1148.403 | 17.06   | 1148.403 | 16.98    | 1148.403 | 17.12607 | 1148.403 | 17.23626 |
| 17.48451 | 1148.403 | 17.0658 | 1148.403 | 16.98382 | 1148.403 | 17.13    | 1148.403 | 17.24    |

|          |          |         |          |          |          |          |          |          |
|----------|----------|---------|----------|----------|----------|----------|----------|----------|
| 17.49    | 1148.403 | 17.07   | 1148.403 | 16.99    | 1148.403 | 17.13607 | 1148.403 | 17.24626 |
| 17.49451 | 1148.403 | 17.0758 | 1148.403 | 16.99382 | 1148.403 | 17.14    | 1148.403 | 17.25    |
| 17.5     | 1148.403 | 17.08   | 1148.403 | 17       | 1148.403 | 17.14607 | 1148.403 | 17.25626 |
| 17.50451 | 1148.403 | 17.0858 | 1148.403 | 17.00382 | 1148.403 | 17.15    | 1148.403 | 17.26    |
| 17.51    | 1148.403 | 17.09   | 1148.403 | 17.01    | 1148.403 | 17.15607 | 1148.403 | 17.26626 |
| 17.51451 | 1148.403 | 17.0958 | 1148.403 | 17.01382 | 1148.403 | 17.16    | 1148.403 | 17.27    |
| 17.52    | 1148.403 | 17.1    | 1148.403 | 17.02    | 1148.403 | 17.16607 | 1148.403 | 17.27626 |
| 17.52451 | 1148.403 | 17.1058 | 1148.403 | 17.02382 | 1148.403 | 17.17    | 1148.403 | 17.28    |
| 17.53    | 1148.403 | 17.11   | 1148.403 | 17.03    | 1148.403 | 17.17607 | 1148.403 | 17.28626 |
| 17.53451 | 1148.403 | 17.1158 | 1148.403 | 17.03382 | 1148.403 | 17.18    | 1148.403 | 17.29    |
| 17.54    | 1148.403 | 17.12   | 1148.403 | 17.04    | 1148.403 | 17.18607 | 1148.403 | 17.29626 |
| 17.54451 | 1148.403 | 17.1258 | 1148.403 | 17.04382 | 1148.403 | 17.19    | 1148.403 | 17.3     |
| 17.55    | 1148.403 | 17.13   | 1148.403 | 17.05    | 1148.403 | 17.19607 | 1148.403 | 17.30626 |
| 17.55451 | 1148.403 | 17.1358 | 1148.403 | 17.05382 | 1148.403 | 17.2     | 1148.403 | 17.31    |
| 17.56    | 1148.403 | 17.14   | 1148.403 | 17.06    | 1148.403 | 17.20607 | 1148.403 | 17.31626 |
| 17.56451 | 1148.403 | 17.1458 | 1148.403 | 17.06382 | 1148.403 | 17.21    | 1148.403 | 17.32    |
| 17.57    | 1148.403 | 17.15   | 1148.403 | 17.07    | 1148.403 | 17.21607 | 1148.403 | 17.32626 |
| 17.57451 | 1148.403 | 17.1558 | 1148.403 | 17.07382 | 1148.403 | 17.22    | 1148.403 | 17.33    |
| 17.58    | 1148.403 | 17.16   | 1148.403 | 17.08    | 1148.403 | 17.22607 | 1148.403 | 17.33626 |
| 17.58451 | 1148.403 | 17.1658 | 1148.403 | 17.08382 | 1148.403 | 17.23    | 1148.403 | 17.34    |
| 17.59    | 1148.403 | 17.17   | 1148.403 | 17.09    | 1148.403 | 17.23607 | 1148.403 | 17.34626 |
| 17.59451 | 1148.403 | 17.1758 | 1148.403 | 17.09382 | 1148.403 | 17.24    | 1148.403 | 17.35    |
| 17.6     | 1148.403 | 17.18   | 1148.403 | 17.1     | 1148.403 | 17.24607 | 1148.403 | 17.35626 |
| 17.60451 | 1148.403 | 17.1858 | 1148.403 | 17.10382 | 1148.403 | 17.25    | 1148.403 | 17.36    |
| 17.61    | 1148.403 | 17.19   | 1148.403 | 17.11    | 1148.403 | 17.25607 | 1148.403 | 17.36626 |
| 17.61451 | 1148.403 | 17.1958 | 1148.403 | 17.11382 | 1148.403 | 17.26    | 1148.403 | 17.37    |
| 17.62    | 1148.403 | 17.2    | 1148.403 | 17.12    | 1148.403 | 17.26607 | 1148.403 | 17.37626 |
| 17.62451 | 1148.403 | 17.2058 | 1148.403 | 17.12382 | 1148.403 | 17.27    | 1148.403 | 17.38    |
| 17.63    | 1148.403 | 17.21   | 1148.403 | 17.13    | 1148.403 | 17.27607 | 1148.403 | 17.38626 |
| 17.63451 | 1148.403 | 17.2158 | 1148.403 | 17.13382 | 1148.403 | 17.28    | 1148.403 | 17.39    |
| 17.64    | 1148.403 | 17.22   | 1148.403 | 17.14    | 1148.403 | 17.28607 | 1148.403 | 17.39626 |
| 17.64451 | 1148.403 | 17.2258 | 1148.403 | 17.14382 | 1148.403 | 17.29    | 1148.403 | 17.4     |
| 17.65    | 1148.403 | 17.23   | 1148.403 | 17.15    | 1148.403 | 17.29607 | 1148.403 | 17.40626 |
| 17.65451 | 1148.403 | 17.2358 | 1148.403 | 17.15382 | 1148.403 | 17.3     | 1148.403 | 17.41    |
| 17.66    | 1148.403 | 17.24   | 1148.403 | 17.16    | 1148.403 | 17.30607 | 1148.403 | 17.41626 |
| 17.66451 | 1148.403 | 17.2458 | 1148.403 | 17.16382 | 1148.403 | 17.31    | 1148.403 | 17.42    |
| 17.67    | 1148.403 | 17.25   | 1148.403 | 17.17    | 1148.403 | 17.31607 | 1148.403 | 17.42626 |
| 17.67451 | 1148.403 | 17.2558 | 1148.403 | 17.17382 | 1148.403 | 17.32    | 1148.403 | 17.43    |
| 17.68    | 1148.403 | 17.26   | 1148.403 | 17.18    | 1148.403 | 17.32607 | 1148.403 | 17.43626 |
| 17.68451 | 1148.403 | 17.2658 | 1148.403 | 17.18382 | 1148.403 | 17.33    | 1148.403 | 17.44    |
| 17.69    | 1148.403 | 17.27   | 1148.403 | 17.19    | 1148.403 | 17.33607 | 1148.403 | 17.44626 |
| 17.69451 | 1148.403 | 17.2758 | 1148.403 | 17.19382 | 1148.403 | 17.34    | 1148.403 | 17.45    |
| 17.7     | 1148.403 | 17.28   | 1148.403 | 17.2     | 1148.403 | 17.34607 | 1148.403 | 17.45626 |
| 17.70451 | 1148.403 | 17.2858 | 1148.403 | 17.20382 | 1148.403 | 17.35    | 1148.403 | 17.46    |
| 17.71    | 1148.403 | 17.29   | 1148.403 | 17.21    | 1148.403 | 17.35607 | 1148.403 | 17.46626 |
| 17.71451 | 1148.403 | 17.2958 | 1148.403 | 17.21382 | 1148.403 | 17.36    | 1148.403 | 17.47    |
| 17.72    | 1148.403 | 17.3    | 1148.403 | 17.22    | 1148.403 | 17.36607 | 1148.403 | 17.47626 |

|          |          |         |          |          |          |          |          |          |
|----------|----------|---------|----------|----------|----------|----------|----------|----------|
| 17.72451 | 1148.403 | 17.3058 | 1148.403 | 17.22382 | 1148.403 | 17.37    | 1148.403 | 17.48    |
| 17.73    | 1148.403 | 17.31   | 1148.403 | 17.23    | 1148.403 | 17.37607 | 1148.403 | 17.48626 |
| 17.73451 | 1148.403 | 17.3158 | 1148.403 | 17.23382 | 1148.403 | 17.38    | 1148.403 | 17.49    |
| 17.74    | 1148.403 | 17.32   | 1148.403 | 17.24    | 1148.403 | 17.38607 | 1148.403 | 17.49626 |
| 17.74451 | 1148.403 | 17.3258 | 1148.403 | 17.24382 | 1148.403 | 17.39    | 1148.403 | 17.5     |
| 17.75    | 1148.403 | 17.33   | 1148.403 | 17.25    | 1148.403 | 17.39607 | 1148.403 | 17.50626 |
| 17.75451 | 1148.403 | 17.3358 | 1148.403 | 17.25382 | 1148.403 | 17.4     | 1148.403 | 17.51    |
| 17.76    | 1148.403 | 17.34   | 1148.403 | 17.26    | 1148.403 | 17.40607 | 1148.403 | 17.51626 |
| 17.76451 | 1148.403 | 17.3458 | 1148.403 | 17.26382 | 1148.403 | 17.41    | 1148.403 | 17.52    |
| 17.77    | 1148.403 | 17.35   | 1148.403 | 17.27    | 1148.403 | 17.41607 | 1148.403 | 17.52626 |
| 17.77451 | 1148.403 | 17.3558 | 1148.403 | 17.27382 | 1148.403 | 17.42    | 1148.403 | 17.53    |
| 17.78    | 1148.403 | 17.36   | 1148.403 | 17.28    | 1148.403 | 17.42607 | 1148.403 | 17.53626 |
| 17.78451 | 1148.403 | 17.3658 | 1148.403 | 17.28382 | 1148.403 | 17.43    | 1148.403 | 17.54    |
| 17.79    | 1148.403 | 17.37   | 1148.403 | 17.29    | 1148.403 | 17.43607 | 1148.403 | 17.54626 |
| 17.79451 | 1148.403 | 17.3758 | 1148.403 | 17.29382 | 1148.403 | 17.44    | 1148.403 | 17.55    |
| 17.8     | 1148.403 | 17.38   | 1148.403 | 17.3     | 1148.403 | 17.44607 | 1148.403 | 17.55626 |
| 17.80451 | 1148.403 | 17.3858 | 1148.403 | 17.30382 | 1148.403 | 17.45    | 1148.403 | 17.56    |
| 17.81    | 1148.403 | 17.39   | 1148.403 | 17.31    | 1148.403 | 17.45607 | 1148.403 | 17.56626 |
| 17.81451 | 1148.403 | 17.3958 | 1148.403 | 17.31382 | 1148.403 | 17.46    | 1148.403 | 17.57    |
| 17.82    | 1148.403 | 17.4    | 1148.403 | 17.32    | 1148.403 | 17.46607 | 1148.403 | 17.57626 |
| 17.82451 | 1148.403 | 17.4058 | 1148.403 | 17.32382 | 1148.403 | 17.47    | 1148.403 | 17.58    |
| 17.83    | 1148.403 | 17.41   | 1148.403 | 17.33    | 1148.403 | 17.47607 | 1148.403 | 17.58626 |
| 17.83451 | 1148.403 | 17.4158 | 1148.403 | 17.33382 | 1148.403 | 17.48    | 1148.403 | 17.59    |
| 17.84    | 1148.403 | 17.42   | 1148.403 | 17.34    | 1148.403 | 17.48607 | 1148.403 | 17.59626 |
| 17.84451 | 1148.403 | 17.4258 | 1148.403 | 17.34382 | 1148.403 | 17.49    | 1148.403 | 17.6     |
| 17.85    | 1148.403 | 17.43   | 1148.403 | 17.35    | 1148.403 | 17.49607 | 1148.403 | 17.60626 |
| 17.85451 | 1148.403 | 17.4358 | 1148.403 | 17.35382 | 1148.403 | 17.5     | 1148.403 | 17.61    |
| 17.86    | 1148.403 | 17.44   | 1148.403 | 17.36    | 1148.403 | 17.50607 | 1148.403 | 17.61626 |
| 17.86451 | 1148.403 | 17.4458 | 1148.403 | 17.36382 | 1148.403 | 17.51    | 1148.403 | 17.62    |
| 17.87    | 1148.403 | 17.45   | 1148.403 | 17.37    | 1148.403 | 17.51607 | 1148.403 | 17.62626 |
| 17.87451 | 1148.403 | 17.4558 | 1148.403 | 17.37382 | 1148.403 | 17.52    | 1148.403 | 17.63    |
| 17.88    | 1148.403 | 17.46   | 1148.403 | 17.38    | 1148.403 | 17.52607 | 1148.403 | 17.63626 |
| 17.88451 | 1148.403 | 17.4658 | 1148.403 | 17.38382 | 1148.403 | 17.53    | 1148.403 | 17.64    |
| 17.89    | 1148.403 | 17.47   | 1148.403 | 17.39    | 1148.403 | 17.53607 | 1148.403 | 17.64626 |
| 17.89451 | 1148.403 | 17.4758 | 1148.403 | 17.39382 | 1148.403 | 17.54    | 1148.403 | 17.65    |
| 17.9     | 1148.403 | 17.48   | 1148.403 | 17.4     | 1148.403 | 17.54607 | 1148.403 | 17.65626 |
| 17.90451 | 1148.403 | 17.4858 | 1148.403 | 17.40382 | 1148.403 | 17.55    | 1148.403 | 17.66    |
| 17.91    | 1148.403 | 17.49   | 1148.403 | 17.41    | 1148.403 | 17.55607 | 1148.403 | 17.66626 |
| 17.91451 | 1148.403 | 17.4958 | 1148.403 | 17.41382 | 1148.403 | 17.56    | 1148.403 | 17.67    |
| 17.92    | 1148.403 | 17.5    | 1148.403 | 17.42    | 1148.403 | 17.56607 | 1148.403 | 17.67626 |
| 17.92451 | 1148.403 | 17.5058 | 1148.403 | 17.42382 | 1148.403 | 17.57    | 1148.403 | 17.68    |
| 17.93    | 1148.403 | 17.51   | 1148.403 | 17.43    | 1148.403 | 17.57607 | 1148.403 | 17.68626 |
| 17.93451 | 1148.403 | 17.5158 | 1148.403 | 17.43382 | 1148.403 | 17.58    | 1148.403 | 17.69    |
| 17.94    | 1148.403 | 17.52   | 1148.403 | 17.44    | 1148.403 | 17.58607 | 1148.403 | 17.69626 |
| 17.94451 | 1148.403 | 17.5258 | 1148.403 | 17.44382 | 1148.403 | 17.59    | 1148.403 | 17.7     |
| 17.95    | 1148.403 | 17.53   | 1148.403 | 17.45    | 1148.403 | 17.59607 | 1148.403 | 17.70626 |
| 17.95451 | 1148.403 | 17.5358 | 1148.403 | 17.45382 | 1148.403 | 17.6     | 1148.403 | 17.71    |

|          |          |         |          |          |          |          |          |          |
|----------|----------|---------|----------|----------|----------|----------|----------|----------|
| 17.96    | 1148.403 | 17.54   | 1148.403 | 17.46    | 1148.403 | 17.60607 | 1148.403 | 17.71626 |
| 17.96451 | 1148.403 | 17.5458 | 1148.403 | 17.46382 | 1148.403 | 17.61    | 1148.403 | 17.72    |
| 17.97    | 1148.403 | 17.55   | 1148.403 | 17.47    | 1148.403 | 17.61607 | 1148.403 | 17.72626 |
| 17.97451 | 1148.403 | 17.5558 | 1148.403 | 17.47382 | 1148.403 | 17.62    | 1148.403 | 17.73    |
| 17.98    | 1148.403 | 17.56   | 1148.403 | 17.48    | 1148.403 | 17.62607 | 1148.403 | 17.73626 |
| 17.98451 | 1148.403 | 17.5658 | 1148.403 | 17.48382 | 1148.403 | 17.63    | 1148.403 | 17.74    |
| 17.99    | 1148.403 | 17.57   | 1148.403 | 17.49    | 1148.403 | 17.63607 | 1148.403 | 17.74626 |
| 17.99451 | 1148.403 | 17.5758 | 1148.403 | 17.49382 | 1148.403 | 17.64    | 1148.403 | 17.75    |
| 18       | 1148.403 | 17.58   | 1148.403 | 17.5     | 1148.403 | 17.64607 | 1148.403 | 17.75626 |
| 18.00451 | 1148.403 | 17.5858 | 1148.403 | 17.50382 | 1148.403 | 17.65    | 1148.403 | 17.76    |
| 18.01    | 1148.403 | 17.59   | 1148.403 | 17.51    | 1148.403 | 17.65607 | 1148.403 | 17.76626 |
| 18.01451 | 1148.403 | 17.5958 | 1148.403 | 17.51382 | 1148.403 | 17.66    | 1148.403 | 17.77    |
| 18.02    | 1148.403 | 17.6    | 1148.403 | 17.52    | 1148.403 | 17.66607 | 1148.403 | 17.77626 |
| 18.02451 | 1148.403 | 17.6058 | 1148.403 | 17.52382 | 1148.403 | 17.67    | 1148.403 | 17.78    |
| 18.03    | 1148.403 | 17.61   | 1148.403 | 17.53    | 1148.403 | 17.67607 | 1148.403 | 17.78626 |
| 18.03451 | 1148.403 | 17.6158 | 1148.403 | 17.53382 | 1148.403 | 17.68    | 1148.403 | 17.79    |
| 18.04    | 1148.403 | 17.62   | 1148.403 | 17.54    | 1148.403 | 17.68607 | 1148.403 | 17.79626 |
| 18.04451 | 1148.403 | 17.6258 | 1148.403 | 17.54382 | 1148.403 | 17.69    | 1148.403 | 17.8     |
| 18.05    | 1148.403 | 17.63   | 1148.403 | 17.55    | 1148.403 | 17.69607 | 1148.403 | 17.80626 |
| 18.05451 | 1148.403 | 17.6358 | 1148.403 | 17.55382 | 1148.403 | 17.7     | 1148.403 | 17.81    |
| 18.06    | 1148.403 | 17.64   | 1148.403 | 17.56    | 1148.403 | 17.70607 | 1148.403 | 17.81626 |
| 18.06451 | 1148.403 | 17.6458 | 1148.403 | 17.56382 | 1148.403 | 17.71    | 1148.403 | 17.82    |
| 18.07    | 1148.403 | 17.65   | 1148.403 | 17.57    | 1148.403 | 17.71607 | 1148.403 | 17.82626 |
| 18.07451 | 1148.403 | 17.6558 | 1148.403 | 17.57382 | 1148.403 | 17.72    | 1148.403 | 17.83    |
| 18.08    | 1148.403 | 17.66   | 1148.403 | 17.58    | 1148.403 | 17.72607 | 1148.403 | 17.83626 |
| 18.08451 | 1148.403 | 17.6658 | 1148.403 | 17.58382 | 1148.403 | 17.73    | 1148.403 | 17.84    |
| 18.09    | 1148.403 | 17.67   | 1148.403 | 17.59    | 1148.403 | 17.73607 | 1148.403 | 17.84626 |
| 18.09451 | 1148.403 | 17.6758 | 1148.403 | 17.59382 | 1148.403 | 17.74    | 1148.403 | 17.85    |
| 18.1     | 1148.403 | 17.68   | 1148.403 | 17.6     | 1148.403 | 17.74607 | 1148.403 | 17.85626 |
| 18.10451 | 1148.403 | 17.6858 | 1148.403 | 17.60382 | 1148.403 | 17.75    | 1148.403 | 17.86    |
| 18.11    | 1148.403 | 17.69   | 1148.403 | 17.61    | 1148.403 | 17.75607 | 1148.403 | 17.86626 |
| 18.11451 | 1148.403 | 17.6958 | 1148.403 | 17.61382 | 1148.403 | 17.76    | 1148.403 | 17.87    |
| 18.12    | 1148.403 | 17.7    | 1148.403 | 17.62    | 1148.403 | 17.76607 | 1148.403 | 17.87626 |
| 18.12451 | 1148.403 | 17.7058 | 1148.403 | 17.62382 | 1148.403 | 17.77    | 1148.403 | 17.88    |
| 18.13    | 1148.403 | 17.71   | 1148.403 | 17.63    | 1148.403 | 17.77607 | 1148.403 | 17.88626 |
| 18.13451 | 1148.403 | 17.7158 | 1148.403 | 17.63382 | 1148.403 | 17.78    | 1148.403 | 17.89    |
| 18.14    | 1148.403 | 17.72   | 1148.403 | 17.64    | 1148.403 | 17.78607 | 1148.403 | 17.89626 |
| 18.14451 | 1148.403 | 17.7258 | 1148.403 | 17.64382 | 1148.403 | 17.79    | 1148.403 | 17.9     |
| 18.15    | 1148.403 | 17.73   | 1148.403 | 17.65    | 1148.403 | 17.79607 | 1148.403 | 17.90626 |
| 18.15451 | 1148.403 | 17.7358 | 1148.403 | 17.65382 | 1148.403 | 17.8     | 1148.403 | 17.91    |
| 18.16    | 1148.403 | 17.74   | 1148.403 | 17.66    | 1148.403 | 17.80607 | 1148.403 | 17.91626 |
| 18.16451 | 1148.403 | 17.7458 | 1148.403 | 17.66382 | 1148.403 | 17.81    | 1148.403 | 17.92    |
| 18.17    | 1148.403 | 17.75   | 1148.403 | 17.67    | 1148.403 | 17.81607 | 1148.403 | 17.92626 |
| 18.17451 | 1148.403 | 17.7558 | 1148.403 | 17.67382 | 1148.403 | 17.82    | 1148.403 | 17.93    |
| 18.18    | 1148.403 | 17.76   | 1148.403 | 17.68    | 1148.403 | 17.82607 | 1148.403 | 17.93626 |
| 18.18451 | 1148.403 | 17.7658 | 1148.403 | 17.68382 | 1148.403 | 17.83    | 1148.403 | 17.94    |
| 18.19    | 1148.403 | 17.77   | 1148.403 | 17.69    | 1148.403 | 17.83607 | 1148.403 | 17.94626 |



|          |          |         |          |          |          |          |          |          |
|----------|----------|---------|----------|----------|----------|----------|----------|----------|
| 18.19451 | 1148.403 | 17.7758 | 1148.403 | 17.69382 | 1148.403 | 17.84    | 1148.403 | 17.95    |
| 18.2     | 1148.403 | 17.78   | 1148.403 | 17.7     | 1148.403 | 17.84607 | 1148.403 | 17.95626 |
| 18.20451 | 1148.403 | 17.7858 | 1148.403 | 17.70382 | 1148.403 | 17.85    | 1148.403 | 17.96    |
| 18.21    | 1148.403 | 17.79   | 1148.403 | 17.71    | 1148.403 | 17.85607 | 1148.403 | 17.96626 |
| 18.21451 | 1148.403 | 17.7958 | 1148.403 | 17.71382 | 1148.403 | 17.86    | 1148.403 | 17.97    |
| 18.22    | 1148.403 | 17.8    | 1148.403 | 17.72    | 1148.403 | 17.86607 | 1148.403 | 17.97626 |
| 18.22451 | 1148.403 | 17.8058 | 1148.403 | 17.72382 | 1148.403 | 17.87    | 1148.403 | 17.98    |
| 18.23    | 1148.403 | 17.81   | 1148.403 | 17.73    | 1148.403 | 17.87607 | 1148.403 | 17.98626 |
| 18.23451 | 1148.403 | 17.8158 | 1148.403 | 17.73382 | 1148.403 | 17.88    | 1148.403 | 17.99    |
| 18.24    | 1148.403 | 17.82   | 1148.403 | 17.74    | 1148.403 | 17.88607 | 1148.403 | 17.99626 |
| 18.24451 | 1148.403 | 17.8258 | 1148.403 | 17.74382 | 1148.403 | 17.89    | 1148.403 | 18       |
| 18.25    | 1148.403 | 17.83   | 1148.403 | 17.75    | 1148.403 | 17.89607 | 1148.403 | 18.00626 |
| 18.25451 | 1148.403 | 17.8358 | 1148.403 | 17.75382 | 1148.403 | 17.9     | 1148.403 | 18.01    |
| 18.26    | 1148.403 | 17.84   | 1148.403 | 17.76    | 1148.403 | 17.90607 | 1148.403 | 18.01626 |
| 18.26451 | 1148.403 | 17.8458 | 1148.403 | 17.76382 | 1148.403 | 17.91    | 1148.403 | 18.02    |
| 18.27    | 1148.403 | 17.85   | 1148.403 | 17.77    | 1148.403 | 17.91607 | 1148.403 | 18.02626 |
| 18.27451 | 1148.403 | 17.8558 | 1148.403 | 17.77382 | 1148.403 | 17.92    | 1148.403 | 18.03    |
| 18.28    | 1148.403 | 17.86   | 1148.403 | 17.78    | 1148.403 | 17.92607 | 1148.403 | 18.03626 |
| 18.28451 | 1148.403 | 17.8658 | 1148.403 | 17.78382 | 1148.403 | 17.93    | 1148.403 | 18.04    |
| 18.29    | 1148.403 | 17.87   | 1148.403 | 17.79    | 1148.403 | 17.93607 | 1148.403 | 18.04626 |
| 18.29451 | 1148.403 | 17.8758 | 1148.403 | 17.79382 | 1148.403 | 17.94    | 1148.403 | 18.05    |
| 18.3     | 1148.403 | 17.88   | 1148.403 | 17.8     | 1148.403 | 17.94607 | 1148.403 | 18.05626 |
| 18.30451 | 1148.403 | 17.8858 | 1148.403 | 17.80382 | 1148.403 | 17.95    | 1148.403 | 18.06    |
| 18.31    | 1148.403 | 17.89   | 1148.403 | 17.81    | 1148.403 | 17.95607 | 1148.403 | 18.06626 |
| 18.31451 | 1148.403 | 17.8958 | 1148.403 | 17.81382 | 1148.403 | 17.96    | 1148.403 | 18.07    |
| 18.32    | 1148.403 | 17.9    | 1148.403 | 17.82    | 1148.403 | 17.96607 | 1148.403 | 18.07626 |
| 18.32451 | 1148.403 | 17.9058 | 1148.403 | 17.82382 | 1148.403 | 17.97    | 1148.403 | 18.08    |
| 18.33    | 1148.403 | 17.91   | 1148.403 | 17.83    | 1148.403 | 17.97607 | 1148.403 | 18.08626 |
| 18.33451 | 1148.403 | 17.9158 | 1148.403 | 17.83382 | 1148.403 | 17.98    | 1148.403 | 18.09    |
| 18.34    | 1148.403 | 17.92   | 1148.403 | 17.84    | 1148.403 | 17.98607 | 1148.403 | 18.09626 |
| 18.34451 | 1148.403 | 17.9258 | 1148.403 | 17.84382 | 1148.403 | 17.99    | 1148.403 | 18.1     |
| 18.35    | 1148.403 | 17.93   | 1148.403 | 17.85    | 1148.403 | 17.99607 | 1148.403 | 18.10626 |
| 18.35451 | 1148.403 | 17.9358 | 1148.403 | 17.85382 | 1148.403 | 18       | 1148.403 | 18.11    |
| 18.36    | 1148.403 | 17.94   | 1148.403 | 17.86    | 1148.403 | 18.00607 | 1148.403 | 18.11626 |
| 18.36451 | 1148.403 | 17.9458 | 1148.403 | 17.86382 | 1148.403 | 18.01    | 1148.403 | 18.12    |
| 18.37    | 1148.403 | 17.95   | 1148.403 | 17.87    | 1148.403 | 18.01607 | 1148.403 | 18.12626 |
| 18.37451 | 1148.403 | 17.9558 | 1148.403 | 17.87382 | 1148.403 | 18.02    | 1148.403 | 18.13    |
| 18.38    | 1148.403 | 17.96   | 1148.403 | 17.88    | 1148.403 | 18.02607 | 1148.403 | 18.13626 |
| 18.38451 | 1148.403 | 17.9658 | 1148.403 | 17.88382 | 1148.403 | 18.03    | 1148.403 | 18.14    |
| 18.39    | 1148.403 | 17.97   | 1148.403 | 17.89    | 1148.403 | 18.03607 | 1148.403 | 18.14626 |
| 18.39451 | 1148.403 | 17.9758 | 1148.403 | 17.89382 | 1148.403 | 18.04    | 1148.403 | 18.15    |
| 18.4     | 1148.403 | 17.98   | 1148.403 | 17.9     | 1148.403 | 18.04607 | 1148.403 | 18.15626 |
| 18.40451 | 1148.403 | 17.9858 | 1148.403 | 17.90382 | 1148.403 | 18.05    | 1148.403 | 18.16    |
| 18.41    | 1148.403 | 17.99   | 1148.403 | 17.91    | 1148.403 | 18.05607 | 1148.403 | 18.16626 |
| 18.41451 | 1148.403 | 17.9958 | 1148.403 | 17.91382 | 1148.403 | 18.06    | 1148.403 | 18.17    |
| 18.42    | 1148.403 | 18      | 1148.403 | 17.92    | 1148.403 | 18.06607 | 1148.403 | 18.17626 |
| 18.42451 | 1148.403 | 18.0058 | 1148.403 | 17.92382 | 1148.403 | 18.07    | 1148.403 | 18.18    |

|          |          |         |          |          |          |          |          |          |
|----------|----------|---------|----------|----------|----------|----------|----------|----------|
| 18.43    | 1148.403 | 18.01   | 1148.403 | 17.93    | 1148.403 | 18.07607 | 1148.403 | 18.18626 |
| 18.43451 | 1148.403 | 18.0158 | 1148.403 | 17.93382 | 1148.403 | 18.08    | 1148.403 | 18.19    |
| 18.44    | 1148.403 | 18.02   | 1148.403 | 17.94    | 1148.403 | 18.08607 | 1148.403 | 18.19626 |
| 18.44451 | 1148.403 | 18.0258 | 1148.403 | 17.94382 | 1148.403 | 18.09    | 1148.403 | 18.2     |
| 18.45    | 1148.403 | 18.03   | 1148.403 | 17.95    | 1148.403 | 18.09607 | 1148.403 | 18.20626 |
| 18.45451 | 1148.403 | 18.0358 | 1148.403 | 17.95382 | 1148.403 | 18.1     | 1148.403 | 18.21    |
| 18.46    | 1148.403 | 18.04   | 1148.403 | 17.96    | 1148.403 | 18.10607 | 1148.403 | 18.21626 |
| 18.46451 | 1148.403 | 18.0458 | 1148.403 | 17.96382 | 1148.403 | 18.11    | 1148.403 | 18.22    |
| 18.47    | 1148.403 | 18.05   | 1148.403 | 17.97    | 1148.403 | 18.11607 | 1148.403 | 18.22626 |
| 18.47451 | 1148.403 | 18.0558 | 1148.403 | 17.97382 | 1148.403 | 18.12    | 1148.403 | 18.23    |
| 18.48    | 1148.403 | 18.06   | 1148.403 | 17.98    | 1148.403 | 18.12607 | 1148.403 | 18.23626 |
| 18.48451 | 1148.403 | 18.0658 | 1148.403 | 17.98382 | 1148.403 | 18.13    | 1148.403 | 18.24    |
| 18.49    | 1148.403 | 18.07   | 1148.403 | 17.99    | 1148.403 | 18.13607 | 1148.403 | 18.24626 |
| 18.49451 | 1148.403 | 18.0758 | 1148.403 | 17.99382 | 1148.403 | 18.14    | 1148.403 | 18.25    |
| 18.5     | 1148.403 | 18.08   | 1148.403 | 18       | 1148.403 | 18.14607 | 1148.403 | 18.25626 |
| 18.50451 | 1148.403 | 18.0858 | 1148.403 | 18.00382 | 1148.403 | 18.15    | 1148.403 | 18.26    |
| 18.51    | 1148.403 | 18.09   | 1148.403 | 18.01    | 1148.403 | 18.15607 | 1148.403 | 18.26626 |
| 18.51451 | 1148.403 | 18.0958 | 1148.403 | 18.01382 | 1148.403 | 18.16    | 1148.403 | 18.27    |
| 18.52    | 1148.403 | 18.1    | 1148.403 | 18.02    | 1148.403 | 18.16607 | 1148.403 | 18.27626 |
| 18.52451 | 1148.403 | 18.1058 | 1148.403 | 18.02382 | 1148.403 | 18.17    | 1148.403 | 18.28    |
| 18.53    | 1148.403 | 18.11   | 1148.403 | 18.03    | 1148.403 | 18.17607 | 1148.403 | 18.28626 |
| 18.53451 | 1148.403 | 18.1158 | 1148.403 | 18.03382 | 1148.403 | 18.18    | 1148.403 | 18.29    |
| 18.54    | 1148.403 | 18.12   | 1148.403 | 18.04    | 1148.403 | 18.18607 | 1148.403 | 18.29626 |
| 18.54451 | 1148.403 | 18.1258 | 1148.403 | 18.04382 | 1148.403 | 18.19    | 1148.403 | 18.3     |
| 18.55    | 1148.403 | 18.13   | 1148.403 | 18.05    | 1148.403 | 18.19607 | 1148.403 | 18.30626 |
| 18.55451 | 1148.403 | 18.1358 | 1148.403 | 18.05382 | 1148.403 | 18.2     | 1148.403 | 18.31    |
| 18.56    | 1148.403 | 18.14   | 1148.403 | 18.06    | 1148.403 | 18.20607 | 1148.403 | 18.31626 |
| 18.56451 | 1148.403 | 18.1458 | 1148.403 | 18.06382 | 1148.403 | 18.21    | 1148.403 | 18.32    |
| 18.57    | 1148.403 | 18.15   | 1148.403 | 18.07    | 1148.403 | 18.21607 | 1148.403 | 18.32626 |
| 18.57451 | 1148.403 | 18.1558 | 1148.403 | 18.07382 | 1148.403 | 18.22    | 1148.403 | 18.33    |
| 18.58    | 1148.403 | 18.16   | 1148.403 | 18.08    | 1148.403 | 18.22607 | 1148.403 | 18.33626 |
| 18.58451 | 1148.403 | 18.1658 | 1148.403 | 18.08382 | 1148.403 | 18.23    | 1148.403 | 18.34    |
| 18.59    | 1148.403 | 18.17   | 1148.403 | 18.09    | 1148.403 | 18.23607 | 1148.403 | 18.34626 |
| 18.59451 | 1148.403 | 18.1758 | 1148.403 | 18.09382 | 1148.403 | 18.24    | 1148.403 | 18.35    |
| 18.6     | 1148.403 | 18.18   | 1148.403 | 18.1     | 1148.403 | 18.24607 | 1148.403 | 18.35626 |
| 18.60451 | 1148.403 | 18.1858 | 1148.403 | 18.10382 | 1148.403 | 18.25    | 1148.403 | 18.36    |
| 18.61    | 1148.403 | 18.19   | 1148.403 | 18.11    | 1148.403 | 18.25607 | 1148.403 | 18.36626 |
| 18.61451 | 1148.403 | 18.1958 | 1148.403 | 18.11382 | 1148.403 | 18.26    | 1148.403 | 18.37    |
| 18.62    | 1148.403 | 18.2    | 1148.403 | 18.12    | 1148.403 | 18.26607 | 1148.403 | 18.37626 |
| 18.62451 | 1148.403 | 18.2058 | 1148.403 | 18.12382 | 1148.403 | 18.27    | 1148.403 | 18.38    |
| 18.63    | 1148.403 | 18.21   | 1148.403 | 18.13    | 1148.403 | 18.27607 | 1148.403 | 18.38626 |
| 18.63451 | 1148.403 | 18.2158 | 1148.403 | 18.13382 | 1148.403 | 18.28    | 1148.403 | 18.39    |
| 18.64    | 1148.403 | 18.22   | 1148.403 | 18.14    | 1148.403 | 18.28607 | 1148.403 | 18.39626 |
| 18.64451 | 1148.403 | 18.2258 | 1148.403 | 18.14382 | 1148.403 | 18.29    | 1148.403 | 18.4     |
| 18.65    | 1148.403 | 18.23   | 1148.403 | 18.15    | 1148.403 | 18.29607 | 1148.403 | 18.40626 |
| 18.65451 | 1148.403 | 18.2358 | 1148.403 | 18.15382 | 1148.403 | 18.3     | 1148.403 | 18.41    |
| 18.66    | 1148.403 | 18.24   | 1148.403 | 18.16    | 1148.403 | 18.30607 | 1148.403 | 18.41626 |

|          |          |         |          |          |          |          |          |          |
|----------|----------|---------|----------|----------|----------|----------|----------|----------|
| 18.66451 | 1148.403 | 18.2458 | 1148.403 | 18.16382 | 1148.403 | 18.31    | 1148.403 | 18.42    |
| 18.67    | 1148.403 | 18.25   | 1148.403 | 18.17    | 1148.403 | 18.31607 | 1148.403 | 18.42626 |
| 18.67451 | 1148.403 | 18.2558 | 1148.403 | 18.17382 | 1148.403 | 18.32    | 1148.403 | 18.43    |
| 18.68    | 1148.403 | 18.26   | 1148.403 | 18.18    | 1148.403 | 18.32607 | 1148.403 | 18.43626 |
| 18.68451 | 1148.403 | 18.2658 | 1148.403 | 18.18382 | 1148.403 | 18.33    | 1148.403 | 18.44    |
| 18.69    | 1148.403 | 18.27   | 1148.403 | 18.19    | 1148.403 | 18.33607 | 1148.403 | 18.44626 |
| 18.69451 | 1148.403 | 18.2758 | 1148.403 | 18.19382 | 1148.403 | 18.34    | 1148.403 | 18.45    |
| 18.7     | 1148.403 | 18.28   | 1148.403 | 18.2     | 1148.403 | 18.34607 | 1148.403 | 18.45626 |
| 18.70451 | 1148.403 | 18.2858 | 1148.403 | 18.20382 | 1148.403 | 18.35    | 1148.403 | 18.46    |
| 18.71    | 1148.403 | 18.29   | 1148.403 | 18.21    | 1148.403 | 18.35607 | 1148.403 | 18.46626 |
| 18.71451 | 1148.403 | 18.2958 | 1148.403 | 18.21382 | 1148.403 | 18.36    | 1148.403 | 18.47    |
| 18.72    | 1148.403 | 18.3    | 1148.403 | 18.22    | 1148.403 | 18.36607 | 1148.403 | 18.47626 |
| 18.72451 | 1148.403 | 18.3058 | 1148.403 | 18.22382 | 1148.403 | 18.37    | 1148.403 | 18.48    |
| 18.73    | 1148.403 | 18.31   | 1148.403 | 18.23    | 1148.403 | 18.37607 | 1148.403 | 18.48626 |
| 18.73451 | 1148.403 | 18.3158 | 1148.403 | 18.23382 | 1148.403 | 18.38    | 1148.403 | 18.49    |
| 18.74    | 1148.403 | 18.32   | 1148.403 | 18.24    | 1148.403 | 18.38607 | 1148.403 | 18.49626 |
| 18.74451 | 1148.403 | 18.3258 | 1148.403 | 18.24382 | 1148.403 | 18.39    | 1148.403 | 18.5     |
| 18.75    | 1148.403 | 18.33   | 1148.403 | 18.25    | 1148.403 | 18.39607 | 1148.403 | 18.50626 |
| 18.75451 | 1148.403 | 18.3358 | 1148.403 | 18.25382 | 1148.403 | 18.4     | 1148.403 | 18.51    |
| 18.76    | 1148.403 | 18.34   | 1148.403 | 18.26    | 1148.403 | 18.40607 | 1148.403 | 18.51626 |
| 18.76451 | 1148.403 | 18.3458 | 1148.403 | 18.26382 | 1148.403 | 18.41    | 1148.403 | 18.52    |
| 18.77    | 1148.403 | 18.35   | 1148.403 | 18.27    | 1148.403 | 18.41607 | 1148.403 | 18.52626 |
| 18.77451 | 1148.403 | 18.3558 | 1148.403 | 18.27382 | 1148.403 | 18.42    | 1148.403 | 18.53    |
| 18.78    | 1148.403 | 18.36   | 1148.403 | 18.28    | 1148.403 | 18.42607 | 1148.403 | 18.53626 |
| 18.78627 | 1148.403 | 18.3658 | 1148.403 | 18.28382 | 1148.403 | 18.43    | 1148.403 | 18.54    |
| 18.79    | 1148.403 | 18.37   | 1148.403 | 18.29    | 1148.403 | 18.43607 | 1148.403 | 18.54626 |
| 18.79616 | 1148.403 | 18.3758 | 1148.403 | 18.29382 | 1148.403 | 18.44    | 1148.403 | 18.55    |
| 18.8     | 1148.403 | 18.38   | 1148.403 | 18.3     | 1148.403 | 18.44607 | 1148.403 | 18.55626 |
| 18.80616 | 1148.403 | 18.3858 | 1148.403 | 18.30382 | 1148.403 | 18.45    | 1148.403 | 18.56    |
| 18.80925 | 1148.403 | 18.39   | 1148.403 | 18.31    | 1148.403 | 18.45607 | 1148.403 | 18.56626 |
| 18.81039 | 1148.403 | 18.3958 | 1148.403 | 18.31382 | 1148.403 | 18.46    | 1148.403 | 18.57    |
| 18.81309 | 1148.403 | 18.4    | 1148.403 | 18.32    | 1148.403 | 18.46607 | 1148.403 | 18.57626 |
| 18.82    | 1148.403 | 18.4058 | 1148.403 | 18.32382 | 1148.403 | 18.47    | 1148.403 | 18.58    |
| 18.82309 | 1148.403 | 18.41   | 1148.403 | 18.33    | 1148.403 | 18.47607 | 1148.403 | 18.58626 |
| 18.83    | 1148.403 | 18.4158 | 1148.403 | 18.33382 | 1148.403 | 18.48    | 1148.403 | 18.59    |
| 18.83309 | 1148.403 | 18.42   | 1148.403 | 18.34    | 1148.403 | 18.48607 | 1148.403 | 18.59626 |
| 18.84    | 1148.403 | 18.4258 | 1148.403 | 18.34382 | 1148.403 | 18.49    | 1148.403 | 18.6     |
| 18.84309 | 1148.403 | 18.43   | 1148.403 | 18.35    | 1148.403 | 18.49607 | 1148.403 | 18.60626 |
| 18.85    | 1148.403 | 18.4358 | 1148.403 | 18.35382 | 1148.403 | 18.5     | 1148.403 | 18.61    |
| 18.85309 | 1148.403 | 18.44   | 1148.403 | 18.36    | 1148.403 | 18.50607 | 1148.403 | 18.61626 |
| 18.86    | 1148.403 | 18.4458 | 1148.403 | 18.36382 | 1148.403 | 18.51    | 1148.403 | 18.62    |
| 18.86309 | 1148.403 | 18.45   | 1148.403 | 18.37    | 1148.403 | 18.51607 | 1148.403 | 18.62626 |
| 18.87    | 1148.403 | 18.4558 | 1148.403 | 18.37382 | 1148.403 | 18.52    | 1148.403 | 18.63    |
| 18.87309 | 1148.403 | 18.46   | 1148.403 | 18.38    | 1148.403 | 18.52607 | 1148.403 | 18.63626 |
| 18.88    | 1148.403 | 18.4658 | 1148.403 | 18.38382 | 1148.403 | 18.53    | 1148.403 | 18.64    |
| 18.88309 | 1148.403 | 18.47   | 1148.403 | 18.39    | 1148.403 | 18.53607 | 1148.403 | 18.64626 |
| 18.89    | 1148.403 | 18.4758 | 1148.403 | 18.39382 | 1148.403 | 18.54    | 1148.403 | 18.65    |

|          |          |          |          |          |          |          |          |          |
|----------|----------|----------|----------|----------|----------|----------|----------|----------|
| 18.89309 | 1148.403 | 18.48    | 1148.403 | 18.4     | 1148.403 | 18.54607 | 1148.403 | 18.65626 |
| 18.9     | 1148.403 | 18.4858  | 1148.403 | 18.40382 | 1148.403 | 18.55    | 1148.403 | 18.66    |
| 18.90309 | 1148.403 | 18.49    | 1148.403 | 18.41    | 1148.403 | 18.55607 | 1148.403 | 18.66626 |
| 18.91    | 1148.403 | 18.4958  | 1148.403 | 18.41382 | 1148.403 | 18.56    | 1148.403 | 18.67    |
| 18.91309 | 1148.403 | 18.5     | 1148.403 | 18.42    | 1148.403 | 18.56607 | 1148.403 | 18.67626 |
| 18.92    | 1148.403 | 18.5058  | 1148.403 | 18.42382 | 1148.403 | 18.57    | 1148.403 | 18.68    |
| 18.92309 | 1148.403 | 18.51    | 1148.403 | 18.43    | 1148.403 | 18.57607 | 1148.403 | 18.68626 |
| 18.93    | 1148.403 | 18.5158  | 1148.403 | 18.43382 | 1148.403 | 18.58    | 1148.403 | 18.69    |
| 18.93309 | 1148.403 | 18.52    | 1148.403 | 18.44    | 1148.403 | 18.58607 | 1148.403 | 18.69626 |
| 18.94    | 1148.403 | 18.5258  | 1148.403 | 18.44382 | 1148.403 | 18.59    | 1148.403 | 18.7     |
| 18.94309 | 1148.403 | 18.53    | 1148.403 | 18.45    | 1148.403 | 18.59607 | 1148.403 | 18.70626 |
| 18.95    | 1148.403 | 18.5358  | 1148.403 | 18.45382 | 1148.403 | 18.6     | 1148.403 | 18.71    |
| 18.95309 | 1148.403 | 18.54    | 1148.403 | 18.46    | 1148.403 | 18.60607 | 1148.403 | 18.71626 |
| 18.96    | 1148.403 | 18.5458  | 1148.403 | 18.46382 | 1148.403 | 18.61    | 1148.403 | 18.72    |
| 18.96309 | 1148.403 | 18.55    | 1148.403 | 18.47    | 1148.403 | 18.61607 | 1148.403 | 18.72626 |
| 18.97    | 1148.403 | 18.5558  | 1148.403 | 18.47382 | 1148.403 | 18.62    | 1148.403 | 18.73    |
| 18.97309 | 1148.403 | 18.56    | 1148.403 | 18.48    | 1148.403 | 18.62607 | 1148.403 | 18.73626 |
| 18.98    | 1148.403 | 18.5658  | 1148.403 | 18.48382 | 1148.403 | 18.63    | 1148.403 | 18.74    |
| 18.98309 | 1148.403 | 18.57    | 1148.403 | 18.49    | 1148.403 | 18.63607 | 1148.403 | 18.74626 |
| 18.99    | 1148.403 | 18.5758  | 1148.403 | 18.49382 | 1148.403 | 18.64    | 1148.403 | 18.74845 |
| 18.99309 | 1148.403 | 18.58    | 1148.403 | 18.5     | 1148.403 | 18.64607 | 1148.403 | 18.75    |
| 19       | 1148.403 | 18.5858  | 1148.403 | 18.50382 | 1148.403 | 18.65    | 1148.403 | 18.75219 |
| 19.00309 | 1148.403 | 18.59    | 1148.403 | 18.51    | 1148.403 | 18.65607 | 1148.403 | 18.76    |
| 19.01    | 1148.403 | 18.5958  | 1148.403 | 18.51382 | 1148.403 | 18.66    | 1148.403 | 18.76219 |
| 19.01309 | 1148.403 | 18.6     | 1148.403 | 18.52    | 1148.403 | 18.66607 | 1148.403 | 18.77    |
| 19.02    | 1148.403 | 18.6058  | 1148.403 | 18.52382 | 1148.403 | 18.67    | 1148.403 | 18.77219 |
| 19.02309 | 1148.403 | 18.61    | 1148.403 | 18.53    | 1148.403 | 18.67607 | 1148.403 | 18.78    |
| 19.03    | 1148.403 | 18.6158  | 1148.403 | 18.53382 | 1148.403 | 18.68    | 1148.403 | 18.78219 |
| 19.03309 | 1148.403 | 18.62    | 1148.403 | 18.54    | 1148.403 | 18.68607 | 1148.403 | 18.79    |
| 19.04    | 1148.403 | 18.6258  | 1148.403 | 18.54382 | 1148.403 | 18.69    | 1148.403 | 18.79219 |
| 19.04309 | 1148.403 | 18.63    | 1148.403 | 18.55    | 1148.403 | 18.69607 | 1148.403 | 18.8     |
| 19.05    | 1148.403 | 18.6358  | 1148.403 | 18.55382 | 1148.403 | 18.7     | 1148.403 | 18.80219 |
| 19.05309 | 1148.403 | 18.64    | 1148.403 | 18.56    | 1148.403 | 18.70607 | 1148.403 | 18.81    |
| 19.06    | 1148.403 | 18.6458  | 1148.403 | 18.56382 | 1148.403 | 18.71    | 1148.403 | 18.81219 |
| 19.06309 | 1148.403 | 18.65    | 1148.403 | 18.57    | 1148.403 | 18.71607 | 1148.403 | 18.82    |
| 19.07    | 1148.403 | 18.6558  | 1148.403 | 18.57382 | 1148.403 | 18.72    | 1148.403 | 18.82219 |
| 19.07309 | 1148.403 | 18.66    | 1148.403 | 18.58    | 1148.403 | 18.72607 | 1148.403 | 18.83    |
| 19.08    | 1148.403 | 18.6658  | 1148.403 | 18.58382 | 1148.403 | 18.73    | 1148.403 | 18.83219 |
| 19.08309 | 1148.403 | 18.67    | 1148.403 | 18.59    | 1148.403 | 18.73607 | 1148.403 | 18.84    |
| 19.09    | 1148.403 | 18.6758  | 1148.403 | 18.59382 | 1148.403 | 18.74    | 1148.403 | 18.84219 |
| 19.09309 | 1148.403 | 18.68    | 1148.403 | 18.6     | 1148.403 | 18.74607 | 1148.403 | 18.85    |
| 19.1     | 1148.403 | 18.6858  | 1148.403 | 18.60382 | 1148.403 | 18.75    | 1148.403 | 18.85219 |
| 19.10309 | 1148.403 | 18.68913 | 1148.403 | 18.61    | 1148.403 | 18.75607 | 1148.403 | 18.86    |
| 19.11    | 1148.403 | 18.69041 | 1148.403 | 18.61382 | 1148.403 | 18.75917 | 1148.403 | 18.86219 |
| 19.11309 | 1148.403 | 18.69328 | 1148.403 | 18.62    | 1148.403 | 18.76039 | 1148.403 | 18.87    |
| 19.12    | 1148.403 | 18.7     | 1148.403 | 18.62382 | 1148.403 | 18.7631  | 1148.403 | 18.87219 |
| 19.12309 | 1148.403 | 18.70328 | 1148.403 | 18.63    | 1148.403 | 18.77    | 1148.403 | 18.88    |

|          |          |          |          |          |          |          |          |          |
|----------|----------|----------|----------|----------|----------|----------|----------|----------|
| 19.13    | 1148.403 | 18.71    | 1148.403 | 18.63382 | 1148.403 | 18.7731  | 1148.403 | 18.88219 |
| 19.13309 | 1148.403 | 18.71328 | 1148.403 | 18.64    | 1148.403 | 18.78    | 1148.403 | 18.89    |
| 19.14    | 1148.403 | 18.72    | 1148.403 | 18.64382 | 1148.403 | 18.7831  | 1148.403 | 18.89219 |
| 19.14309 | 1148.403 | 18.72328 | 1148.403 | 18.65    | 1148.403 | 18.79    | 1148.403 | 18.9     |
| 19.15    | 1148.403 | 18.73    | 1148.403 | 18.65382 | 1148.403 | 18.7931  | 1148.403 | 18.90219 |
| 19.15309 | 1148.403 | 18.73328 | 1148.403 | 18.66    | 1148.403 | 18.8     | 1148.403 | 18.91    |
| 19.16    | 1148.403 | 18.74    | 1148.403 | 18.66382 | 1148.403 | 18.8031  | 1148.403 | 18.91219 |
| 19.16309 | 1148.403 | 18.74328 | 1148.403 | 18.67    | 1148.403 | 18.81    | 1148.403 | 18.92    |
| 19.17    | 1148.403 | 18.74517 | 1148.403 | 18.67382 | 1148.403 | 18.8131  | 1148.403 | 18.92219 |
| 19.17309 | 1148.403 | 18.75    | 1148.403 | 18.68    | 1148.403 | 18.82    | 1148.403 | 18.93    |
| 19.18    | 1148.403 | 18.75216 | 1148.403 | 18.68382 | 1148.403 | 18.8231  | 1148.403 | 18.93219 |
| 19.18309 | 1148.403 | 18.76    | 1148.403 | 18.69    | 1148.403 | 18.83    | 1148.403 | 18.94    |
| 19.19    | 1148.403 | 18.76216 | 1148.403 | 18.69382 | 1148.403 | 18.8331  | 1148.403 | 18.94219 |
| 19.19309 | 1148.403 | 18.77    | 1148.403 | 18.7     | 1148.403 | 18.83895 | 1148.403 | 18.95    |
| 19.2     | 1148.403 | 18.77216 | 1148.403 | 18.70382 | 1148.403 | 18.84    | 1148.403 | 18.95219 |
| 19.20309 | 1148.403 | 18.78    | 1148.403 | 18.71    | 1148.403 | 18.84668 | 1148.403 | 18.96    |
| 19.21    | 1148.403 | 18.78216 | 1148.403 | 18.71382 | 1148.403 | 18.85    | 1148.403 | 18.96219 |
| 19.21309 | 1148.403 | 18.79    | 1148.403 | 18.72    | 1148.403 | 18.85668 | 1148.403 | 18.97    |
| 19.22    | 1148.403 | 18.79216 | 1148.403 | 18.72382 | 1148.403 | 18.86    | 1148.403 | 18.97219 |
| 19.22309 | 1148.403 | 18.8     | 1148.403 | 18.73    | 1148.403 | 18.86668 | 1148.403 | 18.98    |
| 19.23    | 1148.403 | 18.80216 | 1148.403 | 18.73382 | 1148.403 | 18.87    | 1148.403 | 18.98219 |
| 19.23309 | 1148.403 | 18.81    | 1148.403 | 18.74    | 1148.403 | 18.87668 | 1148.403 | 18.99    |
| 19.24    | 1148.403 | 18.81216 | 1148.403 | 18.74382 | 1148.403 | 18.88    | 1148.403 | 18.99219 |
| 19.24309 | 1148.403 | 18.82    | 1148.403 | 18.75    | 1148.403 | 18.88668 | 1148.403 | 19       |
| 19.25    | 1148.403 | 18.82216 | 1148.403 | 18.75382 | 1148.403 | 18.89    | 1148.403 | 19.00219 |
| 19.25309 | 1148.403 | 18.83    | 1148.403 | 18.76    | 1148.403 | 18.89668 | 1148.403 | 19.01    |
| 19.26    | 1148.403 | 18.83216 | 1148.403 | 18.76382 | 1148.403 | 18.9     | 1148.403 | 19.01219 |
| 19.26309 | 1148.403 | 18.84    | 1148.403 | 18.77    | 1148.403 | 18.90668 | 1148.403 | 19.02    |
| 19.27    | 1148.403 | 18.84216 | 1148.403 | 18.77382 | 1148.403 | 18.91    | 1148.403 | 19.02219 |
| 19.27309 | 1148.403 | 18.85    | 1148.403 | 18.78    | 1148.403 | 18.91668 | 1148.403 | 19.03    |
| 19.28    | 1148.403 | 18.85216 | 1148.403 | 18.78382 | 1148.403 | 18.92    | 1148.403 | 19.03219 |
| 19.28309 | 1148.403 | 18.86    | 1148.403 | 18.7852  | 1148.403 | 18.92668 | 1148.403 | 19.04    |
| 19.29    | 1148.403 | 18.86216 | 1148.403 | 18.79    | 1148.403 | 18.93    | 1148.403 | 19.04219 |
| 19.29309 | 1148.403 | 18.87    | 1148.403 | 18.79158 | 1148.403 | 18.93668 | 1148.403 | 19.05    |
| 19.3     | 1148.403 | 18.87216 | 1148.403 | 18.79311 | 1148.403 | 18.94    | 1148.403 | 19.05219 |
| 19.30309 | 1148.403 | 18.88    | 1148.403 | 18.8     | 1148.403 | 18.94668 | 1148.403 | 19.06    |
| 19.31    | 1148.403 | 18.88216 | 1148.403 | 18.80175 | 1148.403 | 18.95    | 1148.403 | 19.06219 |
| 19.31309 | 1148.403 | 18.89    | 1148.403 | 18.81    | 1148.403 | 18.95668 | 1148.403 | 19.07    |
| 19.32    | 1148.403 | 18.89216 | 1148.403 | 18.81175 | 1148.403 | 18.96    | 1148.403 | 19.07219 |
| 19.32309 | 1148.403 | 18.9     | 1148.403 | 18.82    | 1148.403 | 18.96668 | 1148.403 | 19.08    |
| 19.33    | 1148.403 | 18.90216 | 1148.403 | 18.82175 | 1148.403 | 18.97    | 1148.403 | 19.08219 |
| 19.33309 | 1148.403 | 18.91    | 1148.403 | 18.83    | 1148.403 | 18.97668 | 1148.403 | 19.09    |
| 19.34    | 1148.403 | 18.91216 | 1148.403 | 18.83175 | 1148.403 | 18.98    | 1148.403 | 19.09219 |
| 19.34309 | 1148.403 | 18.92    | 1148.403 | 18.84    | 1148.403 | 18.98668 | 1148.403 | 19.1     |
| 19.35    | 1148.403 | 18.92216 | 1148.403 | 18.84175 | 1148.403 | 18.99    | 1148.403 | 19.10219 |
| 19.35309 | 1148.403 | 18.93    | 1148.403 | 18.85    | 1148.403 | 18.99668 | 1148.403 | 19.11    |
| 19.36    | 1148.403 | 18.93216 | 1148.403 | 18.85175 | 1148.403 | 19       | 1148.403 | 19.11219 |

|          |          |          |          |          |          |          |          |          |
|----------|----------|----------|----------|----------|----------|----------|----------|----------|
| 19.36309 | 1148.403 | 18.94    | 1148.403 | 18.86    | 1148.403 | 19.00668 | 1148.403 | 19.12    |
| 19.37    | 1148.403 | 18.94216 | 1148.403 | 18.86175 | 1148.403 | 19.01    | 1148.403 | 19.12219 |
| 19.37309 | 1148.403 | 18.95    | 1148.403 | 18.87    | 1148.403 | 19.01668 | 1148.403 | 19.13    |
| 19.38    | 1148.403 | 18.95216 | 1148.403 | 18.87175 | 1148.403 | 19.02    | 1148.403 | 19.13219 |
| 19.38309 | 1148.403 | 18.96    | 1148.403 | 18.88    | 1148.403 | 19.02668 | 1148.403 | 19.14    |
| 19.39    | 1148.403 | 18.96216 | 1148.403 | 18.88175 | 1148.403 | 19.03    | 1148.403 | 19.14219 |
| 19.39309 | 1148.403 | 18.97    | 1148.403 | 18.89    | 1148.403 | 19.03668 | 1148.403 | 19.15    |
| 19.4     | 1148.403 | 18.97216 | 1148.403 | 18.89175 | 1148.403 | 19.04    | 1148.403 | 19.15219 |
| 19.40309 | 1148.403 | 18.98    | 1148.403 | 18.9     | 1148.403 | 19.04668 | 1148.403 | 19.16    |
| 19.41    | 1148.403 | 18.98216 | 1148.403 | 18.90175 | 1148.403 | 19.05    | 1148.403 | 19.16219 |
| 19.41309 | 1148.403 | 18.99    | 1148.403 | 18.91    | 1148.403 | 19.05668 | 1148.403 | 19.17    |
| 19.42    | 1148.403 | 18.99216 | 1148.403 | 18.91175 | 1148.403 | 19.06    | 1148.403 | 19.17219 |
| 19.42309 | 1148.403 | 19       | 1148.403 | 18.92    | 1148.403 | 19.06668 | 1148.403 | 19.18    |
| 19.43    | 1148.403 | 19.00216 | 1148.403 | 18.92175 | 1148.403 | 19.07    | 1148.403 | 19.18219 |
| 19.43309 | 1148.403 | 19.01    | 1148.403 | 18.93    | 1148.403 | 19.07668 | 1148.403 | 19.19    |
| 19.44    | 1148.403 | 19.01216 | 1148.403 | 18.93175 | 1148.403 | 19.08    | 1148.403 | 19.19219 |
| 19.44309 | 1148.403 | 19.02    | 1148.403 | 18.94    | 1148.403 | 19.08668 | 1148.403 | 19.2     |
| 19.45    | 1148.403 | 19.02216 | 1148.403 | 18.94175 | 1148.403 | 19.09    | 1148.403 | 19.20219 |
| 19.45309 | 1148.403 | 19.03    | 1148.403 | 18.95    | 1148.403 | 19.09668 | 1148.403 | 19.21    |
| 19.46    | 1148.403 | 19.03216 | 1148.403 | 18.95175 | 1148.403 | 19.1     | 1148.403 | 19.21219 |
| 19.46309 | 1148.403 | 19.04    | 1148.403 | 18.96    | 1148.403 | 19.10668 | 1148.403 | 19.22    |
| 19.47    | 1148.403 | 19.04216 | 1148.403 | 18.96175 | 1148.403 | 19.11    | 1148.403 | 19.22219 |
| 19.47309 | 1148.403 | 19.05    | 1148.403 | 18.97    | 1148.403 | 19.11668 | 1148.403 | 19.23    |
| 19.48    | 1148.403 | 19.05216 | 1148.403 | 18.97175 | 1148.403 | 19.12    | 1148.403 | 19.23219 |
| 19.48309 | 1148.403 | 19.06    | 1148.403 | 18.98    | 1148.403 | 19.12668 | 1148.403 | 19.24    |
| 19.49    | 1148.403 | 19.06216 | 1148.403 | 18.98175 | 1148.403 | 19.13    | 1148.403 | 19.24219 |
| 19.49309 | 1148.403 | 19.07    | 1148.403 | 18.99    | 1148.403 | 19.13668 | 1148.403 | 19.25    |
| 19.5     | 1148.403 | 19.07216 | 1148.403 | 18.99175 | 1148.403 | 19.14    | 1148.403 | 19.25219 |
| 19.50309 | 1148.403 | 19.08    | 1148.403 | 19       | 1148.403 | 19.14668 | 1148.403 | 19.26    |
| 19.51    | 1148.403 | 19.08216 | 1148.403 | 19.00175 | 1148.403 | 19.15    | 1148.403 | 19.26219 |
| 19.51309 | 1148.403 | 19.09    | 1148.403 | 19.01    | 1148.403 | 19.15668 | 1148.403 | 19.27    |
| 19.52    | 1148.403 | 19.09216 | 1148.403 | 19.01175 | 1148.403 | 19.16    | 1148.403 | 19.27219 |
| 19.52309 | 1148.403 | 19.1     | 1148.403 | 19.02    | 1148.403 | 19.16668 | 1148.403 | 19.28    |
| 19.53    | 1148.403 | 19.10216 | 1148.403 | 19.02175 | 1148.403 | 19.17    | 1148.403 | 19.28219 |
| 19.53309 | 1148.403 | 19.11    | 1148.403 | 19.03    | 1148.403 | 19.17668 | 1148.403 | 19.29    |
| 19.54    | 1148.403 | 19.11216 | 1148.403 | 19.03175 | 1148.403 | 19.18    | 1148.403 | 19.29219 |
| 19.54309 | 1148.403 | 19.12    | 1148.403 | 19.04    | 1148.403 | 19.18668 | 1148.403 | 19.3     |
| 19.55    | 1148.403 | 19.12216 | 1148.403 | 19.04175 | 1148.403 | 19.19    | 1148.403 | 19.30219 |
| 19.55309 | 1148.403 | 19.13    | 1148.403 | 19.05    | 1148.403 | 19.19668 | 1148.403 | 19.31    |
| 19.56    | 1148.403 | 19.13216 | 1148.403 | 19.05175 | 1148.403 | 19.2     | 1148.403 | 19.31219 |
| 19.56309 | 1148.403 | 19.14    | 1148.403 | 19.06    | 1148.403 | 19.20668 | 1148.403 | 19.32    |
| 19.57    | 1148.403 | 19.14216 | 1148.403 | 19.06175 | 1148.403 | 19.21    | 1148.403 | 19.32219 |
| 19.57309 | 1148.403 | 19.15    | 1148.403 | 19.07    | 1148.403 | 19.21668 | 1148.403 | 19.33    |
| 19.58    | 1148.403 | 19.15216 | 1148.403 | 19.07175 | 1148.403 | 19.22    | 1148.403 | 19.33219 |
| 19.58309 | 1148.403 | 19.16    | 1148.403 | 19.08    | 1148.403 | 19.22668 | 1148.403 | 19.33416 |
| 19.59    | 1148.403 | 19.16216 | 1148.403 | 19.08175 | 1148.403 | 19.23    | 1148.403 | 19.34    |
| 19.59309 | 1148.403 | 19.17    | 1148.403 | 19.09    | 1148.403 | 19.23668 | 1148.403 | 19.34157 |

|          |          |          |          |          |          |          |          |          |
|----------|----------|----------|----------|----------|----------|----------|----------|----------|
| 19.6     | 1148.403 | 19.17216 | 1148.403 | 19.09175 | 1148.403 | 19.24    | 1148.403 | 19.34314 |
| 19.60309 | 1148.403 | 19.18    | 1148.403 | 19.1     | 1148.403 | 19.24668 | 1148.403 | 19.35    |
| 19.61    | 1148.403 | 19.18216 | 1148.403 | 19.10175 | 1148.403 | 19.25    | 1148.403 | 19.3515  |
| 19.61309 | 1148.403 | 19.19    | 1148.403 | 19.11    | 1148.403 | 19.25668 | 1148.403 | 19.35374 |
| 19.62    | 1148.403 | 19.19216 | 1148.403 | 19.11175 | 1148.403 | 19.26    | 1148.403 | 19.36    |
| 19.62309 | 1148.403 | 19.2     | 1148.403 | 19.12    | 1148.403 | 19.26668 | 1148.403 | 19.36214 |
| 19.63    | 1148.403 | 19.20216 | 1148.403 | 19.12175 | 1148.403 | 19.27    | 1148.403 | 19.37    |
| 19.63309 | 1148.403 | 19.21    | 1148.403 | 19.13    | 1148.403 | 19.27668 | 1148.403 | 19.37214 |
| 19.64    | 1148.403 | 19.21216 | 1148.403 | 19.13175 | 1148.403 | 19.28    | 1148.403 | 19.38    |
| 19.64309 | 1148.403 | 19.22    | 1148.403 | 19.14    | 1148.403 | 19.28668 | 1148.403 | 19.38214 |
| 19.65    | 1148.403 | 19.22216 | 1148.403 | 19.14175 | 1148.403 | 19.29    | 1148.403 | 19.39    |
| 19.65309 | 1148.403 | 19.23    | 1148.403 | 19.15    | 1148.403 | 19.29668 | 1148.403 | 19.39214 |
| 19.65896 | 1148.403 | 19.23216 | 1148.403 | 19.15175 | 1148.403 | 19.3     | 1148.403 | 19.4     |
| 19.66    | 1148.403 | 19.24    | 1148.403 | 19.16    | 1148.403 | 19.30668 | 1148.403 | 19.40214 |
| 19.66245 | 1148.403 | 19.24216 | 1148.403 | 19.16175 | 1148.403 | 19.31    | 1148.403 | 19.41    |
| 19.66495 | 1148.403 | 19.25    | 1148.403 | 19.17    | 1148.403 | 19.31668 | 1148.403 | 19.41214 |
| 19.67    | 1148.403 | 19.25216 | 1148.403 | 19.17175 | 1148.403 | 19.32    | 1148.403 | 19.42    |
| 19.67199 | 1148.403 | 19.26    | 1148.403 | 19.18    | 1148.403 | 19.32668 | 1148.403 | 19.42214 |
| 19.68    | 1148.403 | 19.26216 | 1148.403 | 19.18175 | 1148.403 | 19.33    | 1148.403 | 19.43    |
| 19.68199 | 1148.403 | 19.27    | 1148.403 | 19.19    | 1148.403 | 19.33668 | 1148.403 | 19.43214 |
| 19.69    | 1148.403 | 19.27216 | 1148.403 | 19.19175 | 1148.403 | 19.34    | 1148.403 | 19.44    |
| 19.69199 | 1148.403 | 19.28    | 1148.403 | 19.2     | 1148.403 | 19.34668 | 1148.403 | 19.44214 |
| 19.7     | 1148.403 | 19.28216 | 1148.403 | 19.20175 | 1148.403 | 19.35    | 1148.403 | 19.45    |
| 19.70199 | 1148.403 | 19.29    | 1148.403 | 19.21    | 1148.403 | 19.35668 | 1148.403 | 19.45214 |
| 19.71    | 1148.403 | 19.29216 | 1148.403 | 19.21175 | 1148.403 | 19.36    | 1148.403 | 19.46    |
| 19.71199 | 1148.403 | 19.3     | 1148.403 | 19.22    | 1148.403 | 19.36668 | 1148.403 | 19.46214 |
| 19.72    | 1148.403 | 19.30216 | 1148.403 | 19.22175 | 1148.403 | 19.37    | 1148.403 | 19.47    |
| 19.72199 | 1148.403 | 19.31    | 1148.403 | 19.23    | 1148.403 | 19.37668 | 1148.403 | 19.47214 |
| 19.73    | 1148.403 | 19.31216 | 1148.403 | 19.23175 | 1148.403 | 19.38    | 1148.403 | 19.48    |
| 19.73199 | 1148.403 | 19.32    | 1148.403 | 19.24    | 1148.403 | 19.38668 | 1148.403 | 19.48214 |
| 19.74    | 1148.403 | 19.32216 | 1148.403 | 19.24175 | 1148.403 | 19.39    | 1148.403 | 19.49    |
| 19.74199 | 1148.403 | 19.33    | 1148.403 | 19.25    | 1148.403 | 19.39668 | 1148.403 | 19.49214 |
| 19.75    | 1148.403 | 19.33216 | 1148.403 | 19.25175 | 1148.403 | 19.4     | 1148.403 | 19.5     |
| 19.75199 | 1148.403 | 19.34    | 1148.403 | 19.26    | 1148.403 | 19.40668 | 1148.403 | 19.50214 |
| 19.76    | 1148.403 | 19.34216 | 1148.403 | 19.26175 | 1148.403 | 19.41    | 1148.403 | 19.51    |
| 19.76199 | 1148.403 | 19.35    | 1148.403 | 19.27    | 1148.403 | 19.41668 | 1148.403 | 19.51214 |
| 19.77    | 1148.403 | 19.35216 | 1148.403 | 19.27175 | 1148.403 | 19.42    | 1148.403 | 19.52    |
| 19.77199 | 1148.403 | 19.36    | 1148.403 | 19.28    | 1148.403 | 19.42668 | 1148.403 | 19.52214 |
| 19.78    | 1148.403 | 19.36216 | 1148.403 | 19.28175 | 1148.403 | 19.43    | 1148.403 | 19.53    |
| 19.78199 | 1148.403 | 19.37    | 1148.403 | 19.29    | 1148.403 | 19.43668 | 1148.403 | 19.53214 |
| 19.79    | 1148.403 | 19.37216 | 1148.403 | 19.29175 | 1148.403 | 19.44    | 1148.403 | 19.54    |
| 19.79199 | 1148.403 | 19.38    | 1148.403 | 19.3     | 1148.403 | 19.44668 | 1148.403 | 19.54214 |
| 19.8     | 1148.403 | 19.38216 | 1148.403 | 19.30175 | 1148.403 | 19.45    | 1148.403 | 19.55    |
| 19.80199 | 1148.403 | 19.39    | 1148.403 | 19.31    | 1148.403 | 19.45668 | 1148.403 | 19.55214 |
| 19.81    | 1148.403 | 19.39216 | 1148.403 | 19.31175 | 1148.403 | 19.46    | 1148.403 | 19.56    |
| 19.81199 | 1148.403 | 19.4     | 1148.403 | 19.32    | 1148.403 | 19.46668 | 1148.403 | 19.56214 |
| 19.82    | 1148.403 | 19.40216 | 1148.403 | 19.32175 | 1148.403 | 19.47    | 1148.403 | 19.57    |

|          |          |          |          |          |          |          |          |          |
|----------|----------|----------|----------|----------|----------|----------|----------|----------|
| 19.82199 | 1148.403 | 19.41    | 1148.403 | 19.33    | 1148.403 | 19.47668 | 1148.403 | 19.57214 |
| 19.83    | 1148.403 | 19.41216 | 1148.403 | 19.33175 | 1148.403 | 19.48    | 1148.403 | 19.58    |
| 19.83199 | 1148.403 | 19.42    | 1148.403 | 19.34    | 1148.403 | 19.48668 | 1148.403 | 19.58214 |
| 19.84    | 1148.403 | 19.42216 | 1148.403 | 19.34175 | 1148.403 | 19.49    | 1148.403 | 19.59    |
| 19.84199 | 1148.403 | 19.43    | 1148.403 | 19.35    | 1148.403 | 19.49668 | 1148.403 | 19.59214 |
| 19.85    | 1148.403 | 19.43216 | 1148.403 | 19.35175 | 1148.403 | 19.5     | 1148.403 | 19.6     |
| 19.85199 | 1148.403 | 19.44    | 1148.403 | 19.36    | 1148.403 | 19.50677 | 1148.403 | 19.60214 |
| 19.86    | 1148.403 | 19.44216 | 1148.403 | 19.36175 | 1148.403 | 19.51    | 1148.403 | 19.61    |
| 19.86199 | 1148.403 | 19.45    | 1148.403 | 19.37    | 1148.403 | 19.5168  | 1148.403 | 19.61214 |
| 19.87    | 1148.403 | 19.45216 | 1148.403 | 19.37175 | 1148.403 | 19.52    | 1148.403 | 19.62    |
| 19.87199 | 1148.403 | 19.46    | 1148.403 | 19.38    | 1148.403 | 19.52668 | 1148.403 | 19.62214 |
| 19.88    | 1148.403 | 19.46216 | 1148.403 | 19.38175 | 1148.403 | 19.53    | 1148.403 | 19.63    |
| 19.88199 | 1148.403 | 19.47    | 1148.403 | 19.39    | 1148.403 | 19.53668 | 1148.403 | 19.63214 |
| 19.89    | 1148.403 | 19.47216 | 1148.403 | 19.39175 | 1148.403 | 19.54    | 1148.403 | 19.64    |
| 19.89199 | 1148.403 | 19.48    | 1148.403 | 19.4     | 1148.403 | 19.54668 | 1148.403 | 19.64214 |
| 19.9     | 1148.403 | 19.48216 | 1148.403 | 19.40175 | 1148.403 | 19.55    | 1148.403 | 19.65    |
| 19.90199 | 1148.403 | 19.49    | 1148.403 | 19.41    | 1148.403 | 19.55668 | 1148.403 | 19.65214 |
| 19.91    | 1148.403 | 19.49216 | 1148.403 | 19.41175 | 1148.403 | 19.56    | 1148.403 | 19.66    |
| 19.91199 | 1148.403 | 19.5     | 1148.403 | 19.42    | 1148.403 | 19.56668 | 1148.403 | 19.66214 |
| 19.92    | 1148.403 | 19.50216 | 1148.403 | 19.42175 | 1148.403 | 19.57    | 1148.403 | 19.67    |
| 19.92199 | 1148.403 | 19.51    | 1148.403 | 19.43    | 1148.403 | 19.57668 | 1148.403 | 19.67214 |
| 19.93    | 1148.403 | 19.51216 | 1148.403 | 19.43175 | 1148.403 | 19.58    | 1148.403 | 19.68    |
| 19.93199 | 1148.403 | 19.52    | 1148.403 | 19.44    | 1148.403 | 19.58668 | 1148.403 | 19.68214 |
| 19.94    | 1148.403 | 19.52216 | 1148.403 | 19.44175 | 1148.403 | 19.59    | 1148.403 | 19.69    |
| 19.94199 | 1148.403 | 19.53    | 1148.403 | 19.45    | 1148.403 | 19.59668 | 1148.403 | 19.69214 |
| 19.95    | 1148.403 | 19.53216 | 1148.403 | 19.45175 | 1148.403 | 19.6     | 1148.403 | 19.7     |
| 19.95199 | 1148.403 | 19.54    | 1148.403 | 19.46    | 1148.403 | 19.60668 | 1148.403 | 19.70214 |
| 19.96    | 1148.403 | 19.54216 | 1148.403 | 19.46175 | 1148.403 | 19.61    | 1148.403 | 19.71    |
| 19.96199 | 1148.403 | 19.55    | 1148.403 | 19.47    | 1148.403 | 19.61668 | 1148.403 | 19.71214 |
| 19.97    | 1148.403 | 19.55216 | 1148.403 | 19.47175 | 1148.403 | 19.62    | 1148.403 | 19.72    |
| 19.97199 | 1148.403 | 19.56    | 1148.403 | 19.48    | 1148.403 | 19.62668 | 1148.403 | 19.72214 |
| 19.98    | 1148.403 | 19.56216 | 1148.403 | 19.48175 | 1148.403 | 19.63    | 1148.403 | 19.73    |
| 19.98199 | 1148.403 | 19.57    | 1148.403 | 19.49    | 1148.403 | 19.63668 | 1148.403 | 19.73214 |
| 19.99    | 1148.403 | 19.57216 | 1148.403 | 19.49175 | 1148.403 | 19.64    | 1148.403 | 19.74    |
| 19.99199 | 1148.403 | 19.58    | 1148.403 | 19.5     | 1148.403 | 19.64668 | 1148.403 | 19.74214 |
| 20       | 1148.403 | 19.58216 | 1148.403 | 19.50175 | 1148.403 | 19.65    | 1148.403 | 19.75    |
|          |          | 19.59    | 1148.403 | 19.51    | 1148.403 | 19.65668 | 1148.403 | 19.75214 |
|          |          | 19.59216 | 1148.403 | 19.51175 | 1148.403 | 19.66    | 1148.403 | 19.76    |
|          |          | 19.6     | 1148.403 | 19.52    | 1148.403 | 19.66668 | 1148.403 | 19.76214 |
|          |          | 19.60216 | 1148.403 | 19.52175 | 1148.403 | 19.67    | 1148.403 | 19.77    |
|          |          | 19.61    | 1148.403 | 19.53    | 1148.403 | 19.67668 | 1148.403 | 19.77214 |
|          |          | 19.61216 | 1148.403 | 19.53175 | 1148.403 | 19.68    | 1148.403 | 19.78    |
|          |          | 19.62    | 1148.403 | 19.54    | 1148.403 | 19.68668 | 1148.403 | 19.78214 |
|          |          | 19.62216 | 1148.403 | 19.54175 | 1148.403 | 19.69    | 1148.403 | 19.79    |
|          |          | 19.63    | 1148.403 | 19.55    | 1148.403 | 19.69668 | 1148.403 | 19.79214 |
|          |          | 19.63216 | 1148.403 | 19.55175 | 1148.403 | 19.7     | 1148.403 | 19.8     |
|          |          | 19.64    | 1148.403 | 19.56    | 1148.403 | 19.70668 | 1148.403 | 19.80214 |



|          |          |          |          |          |          |          |
|----------|----------|----------|----------|----------|----------|----------|
| 19.64216 | 1148.403 | 19.56175 | 1148.403 | 19.71    | 1148.403 | 19.81    |
| 19.6438  | 1148.403 | 19.57    | 1148.403 | 19.71668 | 1148.403 | 19.81214 |
| 19.65    | 1148.403 | 19.57175 | 1148.403 | 19.72    | 1148.403 | 19.82    |
| 19.65142 | 1148.403 | 19.58    | 1148.403 | 19.72668 | 1148.403 | 19.82214 |
| 19.6563  | 1148.403 | 19.58175 | 1148.403 | 19.73    | 1148.403 | 19.83    |
| 19.66    | 1148.403 | 19.59    | 1148.403 | 19.73668 | 1148.403 | 19.83214 |
| 19.66469 | 1148.403 | 19.59175 | 1148.403 | 19.74    | 1148.403 | 19.84    |
| 19.66938 | 1148.403 | 19.6     | 1148.403 | 19.74668 | 1148.403 | 19.84214 |
| 19.67059 | 1148.403 | 19.60175 | 1148.403 | 19.75    | 1148.403 | 19.85    |
| 19.67219 | 1148.403 | 19.61    | 1148.403 | 19.75668 | 1148.403 | 19.85214 |
| 19.68    | 1148.403 | 19.61175 | 1148.403 | 19.76    | 1148.403 | 19.86    |
| 19.68183 | 1148.403 | 19.62    | 1148.403 | 19.76668 | 1148.403 | 19.86214 |
| 19.69    | 1148.403 | 19.62175 | 1148.403 | 19.77    | 1148.403 | 19.87    |
| 19.69183 | 1148.403 | 19.63    | 1148.403 | 19.77668 | 1148.403 | 19.87214 |
| 19.7     | 1148.403 | 19.63175 | 1148.403 | 19.78    | 1148.403 | 19.88    |
| 19.70183 | 1148.403 | 19.63295 | 1148.403 | 19.78668 | 1148.403 | 19.88214 |
| 19.71    | 1148.403 | 19.63649 | 1148.403 | 19.79    | 1148.403 | 19.89    |
| 19.71183 | 1148.403 | 19.64    | 1148.403 | 19.79668 | 1148.403 | 19.89214 |
| 19.72    | 1148.403 | 19.64405 | 1148.403 | 19.8     | 1148.403 | 19.9     |
| 19.72183 | 1148.403 | 19.64768 | 1148.403 | 19.80668 | 1148.403 | 19.90214 |
| 19.73    | 1148.403 | 19.65    | 1148.403 | 19.81    | 1148.403 | 19.91    |
| 19.73183 | 1148.403 | 19.65232 | 1148.403 | 19.81668 | 1148.403 | 19.91214 |
| 19.74    | 1148.403 | 19.66    | 1148.403 | 19.82    | 1148.403 | 19.92    |
| 19.74183 | 1148.403 | 19.6622  | 1148.403 | 19.82668 | 1148.403 | 19.92214 |
| 19.75    | 1148.403 | 19.67    | 1148.403 | 19.83    | 1148.403 | 19.93    |
| 19.75183 | 1148.403 | 19.6722  | 1148.403 | 19.83668 | 1148.403 | 19.93214 |
| 19.76    | 1148.403 | 19.68    | 1148.403 | 19.84    | 1148.403 | 19.94    |
| 19.76183 | 1148.403 | 19.6822  | 1148.403 | 19.84668 | 1148.403 | 19.94214 |
| 19.77    | 1148.403 | 19.69    | 1148.403 | 19.85    | 1148.403 | 19.95    |
| 19.77183 | 1148.403 | 19.6922  | 1148.403 | 19.85668 | 1148.403 | 19.95214 |
| 19.78    | 1148.403 | 19.7     | 1148.403 | 19.86    | 1148.403 | 19.96    |
| 19.78183 | 1148.403 | 19.7022  | 1148.403 | 19.86668 | 1148.403 | 19.96214 |
| 19.79    | 1148.403 | 19.71    | 1148.403 | 19.87    | 1148.403 | 19.97    |
| 19.79183 | 1148.403 | 19.7122  | 1148.403 | 19.87668 | 1148.403 | 19.97214 |
| 19.8     | 1148.403 | 19.72    | 1148.403 | 19.88    | 1148.403 | 19.98    |
| 19.80183 | 1148.403 | 19.7222  | 1148.403 | 19.88663 | 1148.403 | 19.98214 |
| 19.81    | 1148.403 | 19.73    | 1148.403 | 19.89    | 1148.403 | 19.99    |
| 19.81183 | 1148.403 | 19.7322  | 1148.403 | 19.89674 | 1148.403 | 19.99214 |
| 19.82    | 1148.403 | 19.74    | 1148.403 | 19.9     | 1148.403 | 20       |
| 19.82183 | 1148.403 | 19.7422  | 1148.403 | 19.90662 | 1148.403 |          |
| 19.83    | 1148.403 | 19.75    | 1148.403 | 19.91    | 1148.403 |          |
| 19.83183 | 1148.403 | 19.7522  | 1148.403 | 19.91662 | 1148.403 |          |
| 19.84    | 1148.403 | 19.76    | 1148.403 | 19.92    | 1148.403 |          |
| 19.84183 | 1148.403 | 19.7622  | 1148.403 | 19.92662 | 1148.403 |          |
| 19.85    | 1148.403 | 19.77    | 1148.403 | 19.93    | 1148.403 |          |
| 19.85183 | 1148.403 | 19.7722  | 1148.403 | 19.93662 | 1148.403 |          |
| 19.86    | 1148.403 | 19.78    | 1148.403 | 19.94    | 1148.403 |          |

|          |          |          |          |          |          |
|----------|----------|----------|----------|----------|----------|
| 19.86183 | 1148.403 | 19.7822  | 1148.403 | 19.94662 | 1148.403 |
| 19.87    | 1148.403 | 19.79    | 1148.403 | 19.95    | 1148.403 |
| 19.87183 | 1148.403 | 19.7922  | 1148.403 | 19.95662 | 1148.403 |
| 19.88    | 1148.403 | 19.8     | 1148.403 | 19.96    | 1148.403 |
| 19.88183 | 1148.403 | 19.8022  | 1148.403 | 19.96662 | 1148.403 |
| 19.89    | 1148.403 | 19.81    | 1148.403 | 19.97    | 1148.403 |
| 19.89183 | 1148.403 | 19.8122  | 1148.403 | 19.97662 | 1148.403 |
| 19.9     | 1148.403 | 19.82    | 1148.403 | 19.98    | 1148.403 |
| 19.90183 | 1148.403 | 19.8222  | 1148.403 | 19.98662 | 1148.403 |
| 19.91    | 1148.403 | 19.83    | 1148.403 | 19.99    | 1148.403 |
| 19.91183 | 1148.403 | 19.8322  | 1148.403 | 19.99662 | 1148.403 |
| 19.92    | 1148.403 | 19.84    | 1148.403 | 20       | 1148.403 |
| 19.92183 | 1148.403 | 19.8422  | 1148.403 |          |          |
| 19.93    | 1148.403 | 19.85    | 1148.403 |          |          |
| 19.93183 | 1148.403 | 19.8522  | 1148.403 |          |          |
| 19.94    | 1148.403 | 19.86    | 1148.403 |          |          |
| 19.94183 | 1148.403 | 19.8622  | 1148.403 |          |          |
| 19.95    | 1148.403 | 19.87    | 1148.403 |          |          |
| 19.95183 | 1148.403 | 19.8722  | 1148.403 |          |          |
| 19.96    | 1148.403 | 19.88    | 1148.403 |          |          |
| 19.96183 | 1148.403 | 19.8822  | 1148.403 |          |          |
| 19.97    | 1148.403 | 19.88389 | 1148.403 |          |          |
| 19.97183 | 1148.403 | 19.89    | 1148.403 |          |          |
| 19.98    | 1148.403 | 19.89146 | 1148.403 |          |          |
| 19.98183 | 1148.403 | 19.89643 | 1148.403 |          |          |
| 19.99    | 1148.403 | 19.9     | 1148.403 |          |          |
| 19.99183 | 1148.403 | 19.90477 | 1148.403 |          |          |
| 20       | 1148.403 | 19.90966 | 1148.403 |          |          |
|          |          | 19.91233 | 1148.403 |          |          |
|          |          | 19.92    | 1148.403 |          |          |
|          |          | 19.92198 | 1148.403 |          |          |
|          |          | 19.93    | 1148.403 |          |          |
|          |          | 19.93198 | 1148.403 |          |          |
|          |          | 19.94    | 1148.403 |          |          |
|          |          | 19.94198 | 1148.403 |          |          |
|          |          | 19.95    | 1148.403 |          |          |
|          |          | 19.95198 | 1148.403 |          |          |
|          |          | 19.96    | 1148.403 |          |          |
|          |          | 19.96198 | 1148.403 |          |          |
|          |          | 19.97    | 1148.403 |          |          |
|          |          | 19.97198 | 1148.403 |          |          |
|          |          | 19.98    | 1148.403 |          |          |
|          |          | 19.98198 | 1148.403 |          |          |
|          |          | 19.99    | 1148.403 |          |          |
|          |          | 19.99198 | 1148.403 |          |          |
|          |          | 20       | 1148.403 |          |          |



|              | L6:9.50s |              | L6:9.90s |              | L6:9.90s |              | L6:9.90s |              |
|--------------|----------|--------------|----------|--------------|----------|--------------|----------|--------------|
|              | L7:9.90s |              | L7:9.00s |              | L7:9.50s |              | L7:9.90s |              |
| J3.om<br>rpm | t<br>s   | J3.om<br>rpm | t<br>s   | J3.om<br>rpm | t<br>s   | J3.om<br>rpm | t<br>s   | J3.om<br>rpm |
| 1152.51      | 0        | 1152.51      | 0        | 1152.51      | 0        | 1152.51      | 0        | 1152.51      |
| 1152.51      | 0.006678 | 1152.51      | 0.006678 | 1152.51      | 0.006678 | 1152.51      | 0.006678 | 1152.51      |
| 1152.51      | 0.01     | 1152.51      | 0.01     | 1152.51      | 0.01     | 1152.51      | 0.01     | 1152.51      |
| 1152.51      | 0.016678 | 1152.51      | 0.016678 | 1152.51      | 0.016678 | 1152.51      | 0.016678 | 1152.51      |
| 1152.51      | 0.02     | 1152.51      | 0.02     | 1152.51      | 0.02     | 1152.51      | 0.02     | 1152.51      |
| 1152.51      | 0.026678 | 1152.51      | 0.026678 | 1152.51      | 0.026678 | 1152.51      | 0.026678 | 1152.51      |
| 1152.51      | 0.03     | 1152.51      | 0.03     | 1152.51      | 0.03     | 1152.51      | 0.03     | 1152.51      |
| 1152.51      | 0.036678 | 1152.51      | 0.036678 | 1152.51      | 0.036678 | 1152.51      | 0.036678 | 1152.51      |
| 1152.51      | 0.04     | 1152.51      | 0.04     | 1152.51      | 0.04     | 1152.51      | 0.04     | 1152.51      |
| 1152.51      | 0.046678 | 1152.51      | 0.046678 | 1152.51      | 0.046678 | 1152.51      | 0.046678 | 1152.51      |
| 1152.51      | 0.05     | 1152.51      | 0.05     | 1152.51      | 0.05     | 1152.51      | 0.05     | 1152.51      |
| 1152.51      | 0.056678 | 1152.51      | 0.056678 | 1152.51      | 0.056678 | 1152.51      | 0.056678 | 1152.51      |
| 1152.51      | 0.06     | 1152.51      | 0.06     | 1152.51      | 0.06     | 1152.51      | 0.06     | 1152.51      |
| 1152.51      | 0.066678 | 1152.51      | 0.066678 | 1152.51      | 0.066678 | 1152.51      | 0.066678 | 1152.51      |
| 1152.51      | 0.07     | 1152.51      | 0.07     | 1152.51      | 0.07     | 1152.51      | 0.07     | 1152.51      |
| 1152.51      | 0.076678 | 1152.51      | 0.076678 | 1152.51      | 0.076678 | 1152.51      | 0.076678 | 1152.51      |
| 1152.51      | 0.08     | 1152.51      | 0.08     | 1152.51      | 0.08     | 1152.51      | 0.08     | 1152.51      |
| 1152.51      | 0.086678 | 1152.51      | 0.086678 | 1152.51      | 0.086678 | 1152.51      | 0.086678 | 1152.51      |
| 1152.51      | 0.09     | 1152.51      | 0.09     | 1152.51      | 0.09     | 1152.51      | 0.09     | 1152.51      |
| 1152.51      | 0.096678 | 1152.51      | 0.096678 | 1152.51      | 0.096678 | 1152.51      | 0.096678 | 1152.51      |
| 1152.51      | 0.1      | 1152.51      | 0.1      | 1152.51      | 0.1      | 1152.51      | 0.1      | 1152.51      |
| 1152.51      | 0.106678 | 1152.51      | 0.106678 | 1152.51      | 0.106678 | 1152.51      | 0.106678 | 1152.51      |
| 1152.51      | 0.11     | 1152.51      | 0.11     | 1152.51      | 0.11     | 1152.51      | 0.11     | 1152.51      |
| 1152.51      | 0.116678 | 1152.51      | 0.116678 | 1152.51      | 0.116678 | 1152.51      | 0.116678 | 1152.51      |
| 1152.51      | 0.12     | 1152.51      | 0.12     | 1152.51      | 0.12     | 1152.51      | 0.12     | 1152.51      |
| 1152.51      | 0.126678 | 1152.51      | 0.126678 | 1152.51      | 0.126678 | 1152.51      | 0.126678 | 1152.51      |
| 1152.51      | 0.13     | 1152.51      | 0.13     | 1152.51      | 0.13     | 1152.51      | 0.13     | 1152.51      |
| 1152.51      | 0.136678 | 1152.51      | 0.136678 | 1152.51      | 0.136678 | 1152.51      | 0.136678 | 1152.51      |
| 1152.51      | 0.14     | 1152.51      | 0.14     | 1152.51      | 0.14     | 1152.51      | 0.14     | 1152.51      |
| 1152.51      | 0.146678 | 1152.51      | 0.146678 | 1152.51      | 0.146678 | 1152.51      | 0.146678 | 1152.51      |
| 1152.51      | 0.15     | 1152.51      | 0.15     | 1152.51      | 0.15     | 1152.51      | 0.15     | 1152.51      |
| 1152.51      | 0.156678 | 1152.51      | 0.156678 | 1152.51      | 0.156678 | 1152.51      | 0.156678 | 1152.51      |
| 1152.51      | 0.16     | 1152.51      | 0.16     | 1152.51      | 0.16     | 1152.51      | 0.16     | 1152.51      |
| 1152.51      | 0.166678 | 1152.51      | 0.166678 | 1152.51      | 0.166678 | 1152.51      | 0.166678 | 1152.51      |
| 1152.51      | 0.17     | 1152.51      | 0.17     | 1152.51      | 0.17     | 1152.51      | 0.17     | 1152.51      |
| 1152.51      | 0.176678 | 1152.51      | 0.176678 | 1152.51      | 0.176678 | 1152.51      | 0.176678 | 1152         |

[illegible]

[illegible]

[illegible]

[illegible]



[illegible]

[illegible]

[illegible]

[illegible]

[illegible]

[illegible]

[illegible]

[illegible]



[illegible]

|         |          |         |          |          |          |         |          |         |
|---------|----------|---------|----------|----------|----------|---------|----------|---------|
| 1152.51 | 8.91     | 1152.51 | 8.91     | 1152.51  | 8.91     | 1152.51 | 8.91     | 1152.51 |
| 1152.51 | 8.916678 | 1152.51 | 8.916678 | 1152.51  | 8.916678 | 1152.51 | 8.916678 | 1152.51 |
| 1152.51 | 8.92     | 1152.51 | 8.92     | 1152.51  | 8.92     | 1152.51 | 8.92     | 1152.51 |
| 1152.51 | 8.926678 | 1152.51 | 8.926678 | 1152.51  | 8.926678 | 1152.51 | 8.926678 | 1152.51 |
| 1152.51 | 8.93     | 1152.51 | 8.93     | 1152.51  | 8.93     | 1152.51 | 8.93     | 1152.51 |
| 1152.51 | 8.936678 | 1152.51 | 8.936678 | 1152.51  | 8.936678 | 1152.51 | 8.936678 | 1152.51 |
| 1152.51 | 8.94     | 1152.51 | 8.94     | 1152.51  | 8.94     | 1152.51 | 8.94     | 1152.51 |
| 1152.51 | 8.946678 | 1152.51 | 8.946678 | 1152.51  | 8.946678 | 1152.51 | 8.946678 | 1152.51 |
| 1152.51 | 8.95     | 1152.51 | 8.95     | 1152.51  | 8.95     | 1152.51 | 8.95     | 1152.51 |
| 1152.51 | 8.956678 | 1152.51 | 8.956678 | 1152.51  | 8.956678 | 1152.51 | 8.956678 | 1152.51 |
| 1152.51 | 8.96     | 1152.51 | 8.96     | 1152.51  | 8.96     | 1152.51 | 8.96     | 1152.51 |
| 1152.51 | 8.966678 | 1152.51 | 8.966678 | 1152.51  | 8.966678 | 1152.51 | 8.966678 | 1152.51 |
| 1152.51 | 8.97     | 1152.51 | 8.97     | 1152.51  | 8.97     | 1152.51 | 8.97     | 1152.51 |
| 1152.51 | 8.976678 | 1152.51 | 8.976678 | 1152.51  | 8.976678 | 1152.51 | 8.976678 | 1152.51 |
| 1152.51 | 8.98     | 1152.51 | 8.98     | 1152.51  | 8.98     | 1152.51 | 8.98     | 1152.51 |
| 1152.51 | 8.986678 | 1152.51 | 8.986678 | 1152.51  | 8.986678 | 1152.51 | 8.986678 | 1152.51 |
| 1152.51 | 8.99     | 1152.51 | 8.99     | 1152.51  | 8.99     | 1152.51 | 8.99     | 1152.51 |
| 1152.51 | 8.996678 | 1152.51 | 8.996678 | 1152.51  | 8.996678 | 1152.51 | 8.996678 | 1152.51 |
| 1152.51 | 9        | 1152.51 | 8.998131 | 1152.51  | 9        | 1152.51 | 9        | 1152.51 |
| 1152.51 | 9.006678 | 1152.51 | 8.999221 | 1152.51  | 9.006678 | 1152.51 | 9.006678 | 1152.51 |
| 1152.51 | 9.01     | 1152.51 | 9.000225 | 1152.51  | 9.01     | 1152.51 | 9.01     | 1152.51 |
| 1152.51 | 9.016678 | 1152.51 | 9.001254 | 1152.51  | 9.016678 | 1152.51 | 9.016678 | 1152.51 |
| 1152.51 | 9.02     | 1152.51 | 9.002341 | 1152.51  | 9.02     | 1152.51 | 9.02     | 1152.51 |
| 1152.51 | 9.026678 | 1152.51 | 9.00361  | 1152.51  | 9.026678 | 1152.51 | 9.026678 | 1152.51 |
| 1152.51 | 9.03     | 1152.51 | 9.004636 | 1152.51  | 9.03     | 1152.51 | 9.03     | 1152.51 |
| 1152.51 | 9.036678 | 1152.51 | 9.005663 | 1152.51  | 9.036678 | 1152.51 | 9.036678 | 1152.51 |
| 1152.51 | 9.04     | 1152.51 | 9.006689 | 1152.51  | 9.04     | 1152.51 | 9.04     | 1152.51 |
| 1152.51 | 9.046678 | 1152.51 | 9.008317 | 1152.51  | 9.046678 | 1152.51 | 9.046678 | 1152.51 |
| 1152.51 | 9.05     | 1152.51 | 9.009945 | 1152.51  | 9.05     | 1152.51 | 9.05     | 1152.51 |
| 1152.51 | 9.056678 | 1152.51 | 9.011033 | 1152.51  | 9.056678 | 1152.51 | 9.056678 | 1152.51 |
| 1152.51 | 9.06     | 1152.51 | 9.012884 | 1152.51  | 9.06     | 1152.51 | 9.06     | 1152.51 |
| 1152.51 | 9.066678 | 1152.51 | 9.014736 | 1152.51  | 9.066678 | 1152.51 | 9.066678 | 1152.51 |
| 1152.51 | 9.07     | 1152.51 | 9.016929 | 1152.51  | 9.07     | 1152.51 | 9.07     | 1152.51 |
| 1152.51 | 9.076678 | 1152.51 | 9.019123 | 1152.51  | 9.076678 | 1152.51 | 9.076678 | 1152.51 |
| 1152.51 | 9.08     | 1152.51 | 9.020313 | 1152.51  | 9.08     | 1152.51 | 9.08     | 1152.51 |
| 1152.51 | 9.086678 | 1152.51 | 9.021573 | 1152.51  | 9.086678 | 1152.51 | 9.086678 | 1152.51 |
| 1152.51 | 9.09     | 1152.51 | 9.022808 | 1152.51  | 9.09     | 1152.51 | 9.09     | 1152.51 |
| 1152.51 | 9.096678 | 1152.51 | 9.023888 | 1152.51  | 9.096678 | 1152.51 | 9.096678 | 1152.51 |
| 1152.51 | 9.1      | 1152.51 | 9.025779 | 1152.51  | 9.1      | 1152.51 | 9.1      | 1152.51 |
| 1152.51 | 9.106678 | 1152.51 | 9.027316 | 1152.51  | 9.106678 | 1152.51 | 9.106678 | 1152.51 |
| 1152.51 | 9.11     | 1152.51 | 9.028853 | 1152.51  | 9.11     | 1152.51 | 9.11     | 1152.51 |
| 1152.51 | 9.116678 | 1152.51 | 9.029888 | 1152.51  | 9.116678 | 1152.51 | 9.116678 | 1152.51 |
| 1152.51 | 9.12     | 1152.51 | 9.031001 | 1152.511 | 9.12     | 1152.51 | 9.12     | 1152.51 |
| 1152.51 | 9.126678 | 1152.51 | 9.032363 | 1152.511 | 9.126678 | 1152.51 | 9.126678 | 1152.51 |
| 1152.51 | 9.13     | 1152.51 | 9.033598 | 1152.51  | 9.13     | 1152.51 | 9.13     | 1152.51 |
| 1152.51 | 9.136678 | 1152.51 | 9.035019 | 1152.509 | 9.136678 | 1152.51 | 9.136678 | 1152.51 |
| 1152.51 | 9.14     | 1152.51 | 9.03644  | 1152.509 | 9.14     | 1152.51 | 9.14     | 1152.51 |

|         |          |         |          |          |          |         |          |         |
|---------|----------|---------|----------|----------|----------|---------|----------|---------|
| 1152.51 | 9.146678 | 1152.51 | 9.037861 | 1152.51  | 9.146678 | 1152.51 | 9.146678 | 1152.51 |
| 1152.51 | 9.15     | 1152.51 | 9.039282 | 1152.508 | 9.15     | 1152.51 | 9.15     | 1152.51 |
| 1152.51 | 9.156678 | 1152.51 | 9.040722 | 1152.505 | 9.156678 | 1152.51 | 9.156678 | 1152.51 |
| 1152.51 | 9.16     | 1152.51 | 9.04175  | 1152.504 | 9.16     | 1152.51 | 9.16     | 1152.51 |
| 1152.51 | 9.166678 | 1152.51 | 9.042924 | 1152.504 | 9.166678 | 1152.51 | 9.166678 | 1152.51 |
| 1152.51 | 9.17     | 1152.51 | 9.044098 | 1152.503 | 9.17     | 1152.51 | 9.17     | 1152.51 |
| 1152.51 | 9.176678 | 1152.51 | 9.045713 | 1152.501 | 9.176678 | 1152.51 | 9.176678 | 1152.51 |
| 1152.51 | 9.18     | 1152.51 | 9.04674  | 1152.499 | 9.18     | 1152.51 | 9.18     | 1152.51 |
| 1152.51 | 9.186678 | 1152.51 | 9.047767 | 1152.498 | 9.186678 | 1152.51 | 9.186678 | 1152.51 |
| 1152.51 | 9.19     | 1152.51 | 9.048795 | 1152.497 | 9.19     | 1152.51 | 9.19     | 1152.51 |
| 1152.51 | 9.196678 | 1152.51 | 9.05     | 1152.496 | 9.196678 | 1152.51 | 9.196678 | 1152.51 |
| 1152.51 | 9.2      | 1152.51 | 9.051397 | 1152.494 | 9.2      | 1152.51 | 9.2      | 1152.51 |
| 1152.51 | 9.206678 | 1152.51 | 9.052714 | 1152.492 | 9.206678 | 1152.51 | 9.206678 | 1152.51 |
| 1152.51 | 9.21     | 1152.51 | 9.053867 | 1152.49  | 9.21     | 1152.51 | 9.21     | 1152.51 |
| 1152.51 | 9.216678 | 1152.51 | 9.05502  | 1152.488 | 9.216678 | 1152.51 | 9.216678 | 1152.51 |
| 1152.51 | 9.22     | 1152.51 | 9.056172 | 1152.487 | 9.22     | 1152.51 | 9.22     | 1152.51 |
| 1152.51 | 9.226678 | 1152.51 | 9.05819  | 1152.484 | 9.226678 | 1152.51 | 9.226678 | 1152.51 |
| 1152.51 | 9.23     | 1152.51 | 9.06     | 1152.481 | 9.23     | 1152.51 | 9.23     | 1152.51 |
| 1152.51 | 9.236678 | 1152.51 | 9.061279 | 1152.479 | 9.236678 | 1152.51 | 9.236678 | 1152.51 |
| 1152.51 | 9.24     | 1152.51 | 9.062339 | 1152.478 | 9.24     | 1152.51 | 9.24     | 1152.51 |
| 1152.51 | 9.246678 | 1152.51 | 9.064194 | 1152.475 | 9.246678 | 1152.51 | 9.246678 | 1152.51 |
| 1152.51 | 9.25     | 1152.51 | 9.06626  | 1152.472 | 9.25     | 1152.51 | 9.25     | 1152.51 |
| 1152.51 | 9.256678 | 1152.51 | 9.068325 | 1152.469 | 9.256678 | 1152.51 | 9.256678 | 1152.51 |
| 1152.51 | 9.26     | 1152.51 | 9.07     | 1152.466 | 9.26     | 1152.51 | 9.26     | 1152.51 |
| 1152.51 | 9.266678 | 1152.51 | 9.071122 | 1152.464 | 9.266678 | 1152.51 | 9.266678 | 1152.51 |
| 1152.51 | 9.27     | 1152.51 | 9.072312 | 1152.462 | 9.27     | 1152.51 | 9.27     | 1152.51 |
| 1152.51 | 9.276678 | 1152.51 | 9.074562 | 1152.459 | 9.276678 | 1152.51 | 9.276678 | 1152.51 |
| 1152.51 | 9.28     | 1152.51 | 9.08     | 1152.45  | 9.28     | 1152.51 | 9.28     | 1152.51 |
| 1152.51 | 9.286678 | 1152.51 | 9.082571 | 1152.446 | 9.286678 | 1152.51 | 9.286678 | 1152.51 |
| 1152.51 | 9.29     | 1152.51 | 9.09     | 1152.434 | 9.29     | 1152.51 | 9.29     | 1152.51 |
| 1152.51 | 9.296678 | 1152.51 | 9.092571 | 1152.43  | 9.296678 | 1152.51 | 9.296678 | 1152.51 |
| 1152.51 | 9.3      | 1152.51 | 9.1      | 1152.419 | 9.3      | 1152.51 | 9.3      | 1152.51 |
| 1152.51 | 9.306678 | 1152.51 | 9.102571 | 1152.415 | 9.306678 | 1152.51 | 9.306678 | 1152.51 |
| 1152.51 | 9.31     | 1152.51 | 9.11     | 1152.403 | 9.31     | 1152.51 | 9.31     | 1152.51 |
| 1152.51 | 9.316678 | 1152.51 | 9.112571 | 1152.399 | 9.316678 | 1152.51 | 9.316678 | 1152.51 |
| 1152.51 | 9.32     | 1152.51 | 9.12     | 1152.387 | 9.32     | 1152.51 | 9.32     | 1152.51 |
| 1152.51 | 9.326678 | 1152.51 | 9.122571 | 1152.383 | 9.326678 | 1152.51 | 9.326678 | 1152.51 |
| 1152.51 | 9.33     | 1152.51 | 9.13     | 1152.371 | 9.33     | 1152.51 | 9.33     | 1152.51 |
| 1152.51 | 9.336678 | 1152.51 | 9.132571 | 1152.367 | 9.336678 | 1152.51 | 9.336678 | 1152.51 |
| 1152.51 | 9.34     | 1152.51 | 9.14     | 1152.355 | 9.34     | 1152.51 | 9.34     | 1152.51 |
| 1152.51 | 9.346678 | 1152.51 | 9.142571 | 1152.351 | 9.346678 | 1152.51 | 9.346678 | 1152.51 |
| 1152.51 | 9.35     | 1152.51 | 9.15     | 1152.339 | 9.35     | 1152.51 | 9.35     | 1152.51 |
| 1152.51 | 9.356678 | 1152.51 | 9.152571 | 1152.334 | 9.356678 | 1152.51 | 9.356678 | 1152.51 |
| 1152.51 | 9.36     | 1152.51 | 9.16     | 1152.322 | 9.36     | 1152.51 | 9.36     | 1152.51 |
| 1152.51 | 9.366678 | 1152.51 | 9.162571 | 1152.318 | 9.366678 | 1152.51 | 9.366678 | 1152.51 |
| 1152.51 | 9.37     | 1152.51 | 9.17     | 1152.306 | 9.37     | 1152.51 | 9.37     | 1152.51 |
| 1152.51 | 9.376678 | 1152.51 | 9.172571 | 1152.302 | 9.376678 | 1152.51 | 9.376678 | 1152.51 |

|         |          |         |          |          |          |         |          |         |
|---------|----------|---------|----------|----------|----------|---------|----------|---------|
| 1152.51 | 9.38     | 1152.51 | 9.18     | 1152.29  | 9.38     | 1152.51 | 9.38     | 1152.51 |
| 1152.51 | 9.386678 | 1152.51 | 9.182571 | 1152.285 | 9.386678 | 1152.51 | 9.386678 | 1152.51 |
| 1152.51 | 9.39     | 1152.51 | 9.19     | 1152.273 | 9.39     | 1152.51 | 9.39     | 1152.51 |
| 1152.51 | 9.396678 | 1152.51 | 9.192571 | 1152.269 | 9.396678 | 1152.51 | 9.396678 | 1152.51 |
| 1152.51 | 9.4      | 1152.51 | 9.2      | 1152.257 | 9.4      | 1152.51 | 9.4      | 1152.51 |
| 1152.51 | 9.406678 | 1152.51 | 9.202571 | 1152.253 | 9.406678 | 1152.51 | 9.406678 | 1152.51 |
| 1152.51 | 9.41     | 1152.51 | 9.21     | 1152.24  | 9.41     | 1152.51 | 9.41     | 1152.51 |
| 1152.51 | 9.416678 | 1152.51 | 9.212571 | 1152.236 | 9.416678 | 1152.51 | 9.416678 | 1152.51 |
| 1152.51 | 9.42     | 1152.51 | 9.22     | 1152.224 | 9.42     | 1152.51 | 9.42     | 1152.51 |
| 1152.51 | 9.426678 | 1152.51 | 9.222571 | 1152.22  | 9.426678 | 1152.51 | 9.426678 | 1152.51 |
| 1152.51 | 9.43     | 1152.51 | 9.23     | 1152.208 | 9.43     | 1152.51 | 9.43     | 1152.51 |
| 1152.51 | 9.436678 | 1152.51 | 9.232571 | 1152.203 | 9.436678 | 1152.51 | 9.436678 | 1152.51 |
| 1152.51 | 9.44     | 1152.51 | 9.24     | 1152.191 | 9.44     | 1152.51 | 9.44     | 1152.51 |
| 1152.51 | 9.446678 | 1152.51 | 9.242571 | 1152.187 | 9.446678 | 1152.51 | 9.446678 | 1152.51 |
| 1152.51 | 9.45     | 1152.51 | 9.25     | 1152.175 | 9.45     | 1152.51 | 9.45     | 1152.51 |
| 1152.51 | 9.456678 | 1152.51 | 9.252571 | 1152.17  | 9.456678 | 1152.51 | 9.456678 | 1152.51 |
| 1152.51 | 9.46     | 1152.51 | 9.26     | 1152.158 | 9.46     | 1152.51 | 9.46     | 1152.51 |
| 1152.51 | 9.466678 | 1152.51 | 9.262571 | 1152.154 | 9.466678 | 1152.51 | 9.466678 | 1152.51 |
| 1152.51 | 9.47     | 1152.51 | 9.27     | 1152.142 | 9.47     | 1152.51 | 9.47     | 1152.51 |
| 1152.51 | 9.476678 | 1152.51 | 9.272571 | 1152.137 | 9.476678 | 1152.51 | 9.476678 | 1152.51 |
| 1152.51 | 9.48     | 1152.51 | 9.28     | 1152.125 | 9.48     | 1152.51 | 9.48     | 1152.51 |
| 1152.51 | 9.486678 | 1152.51 | 9.282571 | 1152.121 | 9.486678 | 1152.51 | 9.486678 | 1152.51 |
| 1152.51 | 9.49     | 1152.51 | 9.29     | 1152.109 | 9.49     | 1152.51 | 9.49     | 1152.51 |
| 1152.51 | 9.496678 | 1152.51 | 9.292571 | 1152.104 | 9.496678 | 1152.51 | 9.496678 | 1152.51 |
| 1152.51 | 9.499732 | 1152.51 | 9.3      | 1152.092 | 9.498131 | 1152.51 | 9.5      | 1152.51 |
| 1152.51 | 9.500827 | 1152.51 | 9.302571 | 1152.088 | 9.499221 | 1152.51 | 9.506678 | 1152.51 |
| 1152.51 | 9.50225  | 1152.51 | 9.31     | 1152.076 | 9.500225 | 1152.51 | 9.51     | 1152.51 |
| 1152.51 | 9.503299 | 1152.51 | 9.312571 | 1152.071 | 9.501254 | 1152.51 | 9.516678 | 1152.51 |
| 1152.51 | 9.505134 | 1152.51 | 9.32     | 1152.059 | 9.502341 | 1152.51 | 9.52     | 1152.51 |
| 1152.51 | 9.50674  | 1152.51 | 9.322571 | 1152.055 | 9.50361  | 1152.51 | 9.526678 | 1152.51 |
| 1152.51 | 9.508186 | 1152.51 | 9.33     | 1152.043 | 9.504636 | 1152.51 | 9.53     | 1152.51 |
| 1152.51 | 9.509631 | 1152.51 | 9.332571 | 1152.038 | 9.505663 | 1152.51 | 9.536678 | 1152.51 |
| 1152.51 | 9.511242 | 1152.51 | 9.34     | 1152.026 | 9.506689 | 1152.51 | 9.54     | 1152.51 |
| 1152.51 | 9.513132 | 1152.51 | 9.342571 | 1152.022 | 9.508317 | 1152.51 | 9.546678 | 1152.51 |
| 1152.51 | 9.514215 | 1152.51 | 9.35     | 1152.01  | 9.509945 | 1152.51 | 9.55     | 1152.51 |
| 1152.51 | 9.515298 | 1152.51 | 9.352571 | 1152.005 | 9.511033 | 1152.51 | 9.556678 | 1152.51 |
| 1152.51 | 9.516381 | 1152.51 | 9.36     | 1151.993 | 9.512884 | 1152.51 | 9.56     | 1152.51 |
| 1152.51 | 9.517464 | 1152.51 | 9.362571 | 1151.989 | 9.514736 | 1152.51 | 9.566678 | 1152.51 |
| 1152.51 | 9.52     | 1152.51 | 9.37     | 1151.977 | 9.516929 | 1152.51 | 9.57     | 1152.51 |
| 1152.51 | 9.521331 | 1152.51 | 9.372571 | 1151.972 | 9.519123 | 1152.51 | 9.576678 | 1152.51 |
| 1152.51 | 9.522559 | 1152.51 | 9.38     | 1151.96  | 9.520313 | 1152.51 | 9.58     | 1152.51 |
| 1152.51 | 9.523992 | 1152.51 | 9.382571 | 1151.956 | 9.521573 | 1152.51 | 9.586678 | 1152.51 |
| 1152.51 | 9.525246 | 1152.51 | 9.39     | 1151.944 | 9.522808 | 1152.51 | 9.59     | 1152.51 |
| 1152.51 | 9.526661 | 1152.51 | 9.392571 | 1151.939 | 9.523888 | 1152.51 | 9.596678 | 1152.51 |
| 1152.51 | 9.528077 | 1152.51 | 9.4      | 1151.927 | 9.525779 | 1152.51 | 9.6      | 1152.51 |
| 1152.51 | 9.52908  | 1152.51 | 9.402571 | 1151.923 | 9.527316 | 1152.51 | 9.606678 | 1152.51 |
| 1152.51 | 9.530377 | 1152.51 | 9.41     | 1151.911 | 9.528853 | 1152.51 | 9.61     | 1152.51 |

|          |          |         |          |          |          |          |          |         |
|----------|----------|---------|----------|----------|----------|----------|----------|---------|
| 1152.511 | 9.531868 | 1152.51 | 9.412571 | 1151.906 | 9.529888 | 1152.51  | 9.616678 | 1152.51 |
| 1152.511 | 9.533608 | 1152.51 | 9.42     | 1151.894 | 9.531001 | 1152.511 | 9.62     | 1152.51 |
| 1152.511 | 9.535027 | 1152.51 | 9.422571 | 1151.89  | 9.532363 | 1152.511 | 9.626678 | 1152.51 |
| 1152.51  | 9.536555 | 1152.51 | 9.43     | 1151.878 | 9.533598 | 1152.51  | 9.63     | 1152.51 |
| 1152.509 | 9.538082 | 1152.51 | 9.432571 | 1151.873 | 9.535019 | 1152.509 | 9.636678 | 1152.51 |
| 1152.51  | 9.53961  | 1152.51 | 9.44     | 1151.861 | 9.53644  | 1152.509 | 9.64     | 1152.51 |
| 1152.509 | 9.541084 | 1152.51 | 9.442571 | 1151.857 | 9.537861 | 1152.51  | 9.646678 | 1152.51 |
| 1152.506 | 9.543012 | 1152.51 | 9.45     | 1151.845 | 9.539282 | 1152.508 | 9.65     | 1152.51 |
| 1152.505 | 9.545663 | 1152.51 | 9.452571 | 1151.84  | 9.540722 | 1152.505 | 9.656678 | 1152.51 |
| 1152.504 | 9.54735  | 1152.51 | 9.46     | 1151.828 | 9.54175  | 1152.504 | 9.66     | 1152.51 |
| 1152.504 | 9.549037 | 1152.51 | 9.462571 | 1151.824 | 9.542924 | 1152.504 | 9.666678 | 1152.51 |
| 1152.501 | 9.550241 | 1152.51 | 9.47     | 1151.811 | 9.544098 | 1152.503 | 9.67     | 1152.51 |
| 1152.499 | 9.5517   | 1152.51 | 9.472571 | 1151.807 | 9.545713 | 1152.501 | 9.676678 | 1152.51 |
| 1152.497 | 9.553012 | 1152.51 | 9.48     | 1151.795 | 9.54674  | 1152.499 | 9.68     | 1152.51 |
| 1152.496 | 9.554817 | 1152.51 | 9.482571 | 1151.791 | 9.547767 | 1152.498 | 9.686678 | 1152.51 |
| 1152.494 | 9.555966 | 1152.51 | 9.49     | 1151.778 | 9.548795 | 1152.497 | 9.69     | 1152.51 |
| 1152.492 | 9.557114 | 1152.51 | 9.492571 | 1151.774 | 9.55     | 1152.496 | 9.696678 | 1152.51 |
| 1152.489 | 9.559124 | 1152.51 | 9.5      | 1151.762 | 9.551397 | 1152.494 | 9.7      | 1152.51 |
| 1152.486 | 9.560287 | 1152.51 | 9.502571 | 1151.758 | 9.552714 | 1152.492 | 9.706678 | 1152.51 |
| 1152.484 | 9.561663 | 1152.51 | 9.51     | 1151.745 | 9.553867 | 1152.49  | 9.71     | 1152.51 |
| 1152.482 | 9.563011 | 1152.51 | 9.512571 | 1151.741 | 9.55502  | 1152.488 | 9.716678 | 1152.51 |
| 1152.48  | 9.56419  | 1152.51 | 9.52     | 1151.729 | 9.556172 | 1152.487 | 9.72     | 1152.51 |
| 1152.478 | 9.566255 | 1152.51 | 9.522571 | 1151.725 | 9.55819  | 1152.484 | 9.726678 | 1152.51 |
| 1152.476 | 9.568319 | 1152.51 | 9.53     | 1151.712 | 9.56     | 1152.481 | 9.73     | 1152.51 |
| 1152.474 | 9.57     | 1152.51 | 9.532571 | 1151.708 | 9.561279 | 1152.479 | 9.736678 | 1152.51 |
| 1152.472 | 9.571146 | 1152.51 | 9.54     | 1151.696 | 9.562339 | 1152.478 | 9.74     | 1152.51 |
| 1152.468 | 9.572284 | 1152.51 | 9.542571 | 1151.692 | 9.564194 | 1152.475 | 9.746678 | 1152.51 |
| 1152.466 | 9.576314 | 1152.51 | 9.55     | 1151.679 | 9.56626  | 1152.472 | 9.75     | 1152.51 |
| 1152.464 | 9.579001 | 1152.51 | 9.552571 | 1151.675 | 9.568325 | 1152.469 | 9.756678 | 1152.51 |
| 1152.463 | 9.580384 | 1152.51 | 9.56     | 1151.663 | 9.57     | 1152.466 | 9.76     | 1152.51 |
| 1152.457 | 9.583072 | 1152.51 | 9.562571 | 1151.659 | 9.571122 | 1152.464 | 9.766678 | 1152.51 |
| 1152.453 | 9.585759 | 1152.51 | 9.57     | 1151.646 | 9.572312 | 1152.462 | 9.77     | 1152.51 |
| 1152.45  | 9.588178 | 1152.51 | 9.572571 | 1151.642 | 9.574562 | 1152.459 | 9.776678 | 1152.51 |
| 1152.445 | 9.59     | 1152.51 | 9.58     | 1151.63  | 9.58     | 1152.45  | 9.78     | 1152.51 |
| 1152.442 | 9.592765 | 1152.51 | 9.582571 | 1151.626 | 9.582571 | 1152.446 | 9.786678 | 1152.51 |
| 1152.438 | 9.594862 | 1152.51 | 9.59     | 1151.613 | 9.59     | 1152.434 | 9.79     | 1152.51 |
| 1152.435 | 9.59696  | 1152.51 | 9.592571 | 1151.609 | 9.592571 | 1152.43  | 9.796678 | 1152.51 |
| 1152.43  | 9.599058 | 1152.51 | 9.6      | 1151.597 | 9.6      | 1152.419 | 9.8      | 1152.51 |
| 1152.427 | 9.6003   | 1152.51 | 9.602571 | 1151.592 | 9.602571 | 1152.415 | 9.806678 | 1152.51 |
| 1152.424 | 9.602397 | 1152.51 | 9.61     | 1151.58  | 9.61     | 1152.403 | 9.81     | 1152.51 |
| 1152.421 | 9.604378 | 1152.51 | 9.612571 | 1151.576 | 9.612571 | 1152.399 | 9.816678 | 1152.51 |
| 1152.419 | 9.606358 | 1152.51 | 9.62     | 1151.564 | 9.62     | 1152.387 | 9.82     | 1152.51 |
| 1152.415 | 9.608338 | 1152.51 | 9.622571 | 1151.559 | 9.622571 | 1152.383 | 9.826678 | 1152.51 |
| 1152.412 | 9.61     | 1152.51 | 9.63     | 1151.547 | 9.63     | 1152.371 | 9.83     | 1152.51 |
| 1152.409 | 9.612263 | 1152.51 | 9.632571 | 1151.543 | 9.632571 | 1152.367 | 9.836678 | 1152.51 |
| 1152.406 | 9.614134 | 1152.51 | 9.64     | 1151.531 | 9.64     | 1152.355 | 9.84     | 1152.51 |
| 1152.403 | 9.616004 | 1152.51 | 9.642571 | 1151.526 | 9.642571 | 1152.351 | 9.846678 | 1152.51 |

|          |          |         |          |          |          |          |          |          |
|----------|----------|---------|----------|----------|----------|----------|----------|----------|
| 1152.399 | 9.617875 | 1152.51 | 9.65     | 1151.514 | 9.65     | 1152.339 | 9.85     | 1152.51  |
| 1152.396 | 9.62     | 1152.51 | 9.652571 | 1151.51  | 9.652571 | 1152.334 | 9.856678 | 1152.51  |
| 1152.393 | 9.622138 | 1152.51 | 9.66     | 1151.498 | 9.66     | 1152.322 | 9.86     | 1152.51  |
| 1152.39  | 9.6239   | 1152.51 | 9.662571 | 1151.493 | 9.662571 | 1152.318 | 9.866678 | 1152.51  |
| 1152.387 | 9.625663 | 1152.51 | 9.67     | 1151.481 | 9.67     | 1152.306 | 9.87     | 1152.51  |
| 1152.384 | 9.627425 | 1152.51 | 9.672571 | 1151.477 | 9.672571 | 1152.302 | 9.876678 | 1152.51  |
| 1152.381 | 9.63     | 1152.51 | 9.68     | 1151.465 | 9.68     | 1152.29  | 9.88     | 1152.51  |
| 1152.378 | 9.632014 | 1152.51 | 9.682571 | 1151.46  | 9.682571 | 1152.285 | 9.886678 | 1152.51  |
| 1152.375 | 9.63367  | 1152.51 | 9.69     | 1151.448 | 9.69     | 1152.273 | 9.89     | 1152.51  |
| 1152.371 | 9.635326 | 1152.51 | 9.692571 | 1151.444 | 9.692571 | 1152.269 | 9.896678 | 1152.51  |
| 1152.368 | 9.636981 | 1152.51 | 9.7      | 1151.431 | 9.7      | 1152.257 | 9.898131 | 1152.51  |
| 1152.365 | 9.64     | 1152.51 | 9.702571 | 1151.427 | 9.702571 | 1152.253 | 9.899221 | 1152.51  |
| 1152.363 | 9.641892 | 1152.51 | 9.71     | 1151.415 | 9.71     | 1152.24  | 9.90024  | 1152.51  |
| 1152.36  | 9.643443 | 1152.51 | 9.712571 | 1151.411 | 9.712571 | 1152.236 | 9.901244 | 1152.51  |
| 1152.355 | 9.644994 | 1152.51 | 9.72     | 1151.398 | 9.72     | 1152.224 | 9.903287 | 1152.51  |
| 1152.352 | 9.646545 | 1152.51 | 9.722571 | 1151.394 | 9.722571 | 1152.22  | 9.905083 | 1152.51  |
| 1152.35  | 9.65     | 1152.51 | 9.73     | 1151.382 | 9.73     | 1152.208 | 9.907348 | 1152.51  |
| 1152.347 | 9.651772 | 1152.51 | 9.732571 | 1151.378 | 9.732571 | 1152.203 | 9.908714 | 1152.51  |
| 1152.344 | 9.65322  | 1152.51 | 9.74     | 1151.365 | 9.74     | 1152.191 | 9.91     | 1152.51  |
| 1152.339 | 9.654668 | 1152.51 | 9.742571 | 1151.361 | 9.742571 | 1152.187 | 9.911097 | 1152.51  |
| 1152.336 | 9.656116 | 1152.51 | 9.75     | 1151.349 | 9.75     | 1152.175 | 9.912791 | 1152.51  |
| 1152.334 | 9.66     | 1152.51 | 9.752571 | 1151.345 | 9.752571 | 1152.17  | 9.914706 | 1152.51  |
| 1152.331 | 9.661655 | 1152.51 | 9.76     | 1151.332 | 9.76     | 1152.158 | 9.916621 | 1152.51  |
| 1152.329 | 9.663002 | 1152.51 | 9.762571 | 1151.328 | 9.762571 | 1152.154 | 9.919136 | 1152.51  |
| 1152.323 | 9.664349 | 1152.51 | 9.77     | 1151.316 | 9.77     | 1152.142 | 9.920359 | 1152.51  |
| 1152.32  | 9.665696 | 1152.51 | 9.772571 | 1151.312 | 9.772571 | 1152.137 | 9.921541 | 1152.51  |
| 1152.318 | 9.67     | 1152.51 | 9.78     | 1151.299 | 9.78     | 1152.125 | 9.9227   | 1152.51  |
| 1152.316 | 9.67154  | 1152.51 | 9.782571 | 1151.295 | 9.782571 | 1152.121 | 9.923713 | 1152.51  |
| 1152.313 | 9.672789 | 1152.51 | 9.79     | 1151.283 | 9.79     | 1152.109 | 9.924943 | 1152.51  |
| 1152.306 | 9.674038 | 1152.51 | 9.792571 | 1151.278 | 9.792571 | 1152.104 | 9.926173 | 1152.51  |
| 1152.304 | 9.675288 | 1152.51 | 9.8      | 1151.266 | 9.8      | 1152.092 | 9.927404 | 1152.51  |
| 1152.302 | 9.679661 | 1152.51 | 9.802571 | 1151.262 | 9.802571 | 1152.088 | 9.928634 | 1152.51  |
| 1152.3   | 9.68121  | 1152.51 | 9.81     | 1151.25  | 9.81     | 1152.076 | 9.929646 | 1152.51  |
| 1152.298 | 9.682235 | 1152.51 | 9.812571 | 1151.245 | 9.812571 | 1152.071 | 9.930731 | 1152.511 |
| 1152.291 | 9.68326  | 1152.51 | 9.82     | 1151.233 | 9.82     | 1152.059 | 9.93193  | 1152.511 |
| 1152.288 | 9.685053 | 1152.51 | 9.822571 | 1151.229 | 9.822571 | 1152.055 | 9.93306  | 1152.511 |
| 1152.286 | 9.686526 | 1152.51 | 9.83     | 1151.217 | 9.83     | 1152.043 | 9.934095 | 1152.51  |
| 1152.285 | 9.687998 | 1152.51 | 9.832571 | 1151.212 | 9.832571 | 1152.038 | 9.935413 | 1152.509 |
| 1152.282 | 9.689471 | 1152.51 | 9.84     | 1151.2   | 9.84     | 1152.026 | 9.936731 | 1152.51  |
| 1152.279 | 9.691683 | 1152.51 | 9.842571 | 1151.196 | 9.842571 | 1152.022 | 9.938049 | 1152.509 |
| 1152.277 | 9.693155 | 1152.51 | 9.85     | 1151.184 | 9.85     | 1152.01  | 9.939778 | 1152.506 |
| 1152.274 | 9.694377 | 1152.51 | 9.852571 | 1151.179 | 9.852571 | 1152.005 | 9.941102 | 1152.505 |
| 1152.271 | 9.695599 | 1152.51 | 9.86     | 1151.167 | 9.86     | 1151.993 | 9.942132 | 1152.504 |
| 1152.268 | 9.696821 | 1152.51 | 9.862571 | 1151.163 | 9.862571 | 1151.989 | 9.94355  | 1152.504 |
| 1152.266 | 9.69961  | 1152.51 | 9.87     | 1151.15  | 9.87     | 1151.977 | 9.945353 | 1152.501 |
| 1152.264 | 9.700854 | 1152.51 | 9.872571 | 1151.146 | 9.872571 | 1151.972 | 9.947157 | 1152.499 |
| 1152.262 | 9.703046 | 1152.51 | 9.88     | 1151.134 | 9.88     | 1151.96  | 9.948961 | 1152.497 |

|          |          |         |          |          |          |          |          |          |
|----------|----------|---------|----------|----------|----------|----------|----------|----------|
| 1152.257 | 9.704302 | 1152.51 | 9.882571 | 1151.13  | 9.882571 | 1151.956 | 9.95     | 1152.496 |
| 1152.255 | 9.705558 | 1152.51 | 9.89     | 1151.117 | 9.89     | 1151.944 | 9.95116  | 1152.494 |
| 1152.253 | 9.706813 | 1152.51 | 9.892571 | 1151.113 | 9.892571 | 1151.939 | 9.952627 | 1152.492 |
| 1152.251 | 9.709011 | 1152.51 | 9.899732 | 1151.101 | 9.899732 | 1151.928 | 9.954338 | 1152.489 |
| 1152.249 | 9.710314 | 1152.51 | 9.900827 | 1151.099 | 9.900827 | 1151.926 | 9.956692 | 1152.486 |
| 1152.247 | 9.711413 | 1152.51 | 9.90225  | 1151.097 | 9.90225  | 1151.923 | 9.958039 | 1152.484 |
| 1152.241 | 9.712637 | 1152.51 | 9.903299 | 1151.095 | 9.903299 | 1151.922 | 9.959387 | 1152.482 |
| 1152.239 | 9.713739 | 1152.51 | 9.905134 | 1151.092 | 9.905134 | 1151.919 | 9.960668 | 1152.48  |
| 1152.237 | 9.71484  | 1152.51 | 9.90674  | 1151.09  | 9.90674  | 1151.916 | 9.961921 | 1152.478 |
| 1152.234 | 9.715942 | 1152.51 | 9.908186 | 1151.087 | 9.908186 | 1151.914 | 9.963499 | 1152.476 |
| 1152.227 | 9.71787  | 1152.51 | 9.909631 | 1151.085 | 9.909631 | 1151.911 | 9.964972 | 1152.474 |
| 1152.224 | 9.719798 | 1152.51 | 9.911242 | 1151.082 | 9.911242 | 1151.909 | 9.966261 | 1152.472 |
| 1152.222 | 9.721278 | 1152.51 | 9.913132 | 1151.079 | 9.913132 | 1151.905 | 9.968517 | 1152.468 |
| 1152.218 | 9.722394 | 1152.51 | 9.914215 | 1151.077 | 9.914215 | 1151.904 | 9.97     | 1152.466 |
| 1152.216 | 9.723398 | 1152.51 | 9.915298 | 1151.076 | 9.915298 | 1151.902 | 9.971048 | 1152.464 |
| 1152.215 | 9.724403 | 1152.51 | 9.916381 | 1151.074 | 9.916381 | 1151.9   | 9.972093 | 1152.463 |
| 1152.213 | 9.725408 | 1152.51 | 9.917464 | 1151.072 | 9.917464 | 1151.898 | 9.975595 | 1152.457 |
| 1152.21  | 9.727166 | 1152.51 | 9.92     | 1151.068 | 9.92     | 1151.894 | 9.978247 | 1152.453 |
| 1152.208 | 9.728924 | 1152.51 | 9.921331 | 1151.066 | 9.921331 | 1151.892 | 9.98     | 1152.45  |
| 1152.206 | 9.73     | 1152.51 | 9.922559 | 1151.064 | 9.922559 | 1151.89  | 9.98303  | 1152.445 |
| 1152.204 | 9.73118  | 1152.51 | 9.923992 | 1151.061 | 9.923992 | 1151.887 | 9.985243 | 1152.442 |
| 1152.201 | 9.732214 | 1152.51 | 9.925246 | 1151.059 | 9.925246 | 1151.885 | 9.987456 | 1152.438 |
| 1152.199 | 9.734076 | 1152.51 | 9.926661 | 1151.057 | 9.926661 | 1151.883 | 9.989669 | 1152.435 |
| 1152.197 | 9.735154 | 1152.51 | 9.928077 | 1151.054 | 9.928077 | 1151.881 | 9.992529 | 1152.43  |
| 1152.191 | 9.736183 | 1152.51 | 9.929077 | 1151.053 | 9.929077 | 1151.879 | 9.99462  | 1152.427 |
| 1152.189 | 9.74     | 1152.51 | 9.930372 | 1151.051 | 9.930372 | 1151.877 | 9.99671  | 1152.424 |
| 1152.175 | 9.741176 | 1152.51 | 9.931862 | 1151.048 | 9.931862 | 1151.874 | 9.998801 | 1152.421 |
| 1152.172 | 9.748376 | 1152.51 | 9.9336   | 1151.045 | 9.9336   | 1151.872 | 9.999887 | 1152.419 |
| 1152.158 | 9.75     | 1152.51 | 9.935019 | 1151.043 | 9.935019 | 1151.869 | 10.00113 | 1152.417 |
| 1152.156 | 9.751029 | 1152.51 | 9.936546 | 1151.04  | 9.936546 | 1151.867 | 10.00226 | 1152.415 |
| 1152.142 | 9.758229 | 1152.51 | 9.938074 | 1151.038 | 9.938074 | 1151.864 | 10.00346 | 1152.413 |
| 1152.139 | 9.76     | 1152.51 | 9.939601 | 1151.035 | 9.939601 | 1151.862 | 10.00557 | 1152.41  |
| 1152.125 | 9.761029 | 1152.51 | 9.941084 | 1151.033 | 9.941084 | 1151.859 | 10.00673 | 1152.408 |
| 1152.123 | 9.768229 | 1152.51 | 9.943011 | 1151.03  | 9.943011 | 1151.856 | 10.00789 | 1152.406 |
| 1152.109 | 9.77     | 1152.51 | 9.945662 | 1151.025 | 9.945662 | 1151.852 | 10.00905 | 1152.404 |
| 1152.107 | 9.771029 | 1152.51 | 9.947349 | 1151.023 | 9.947349 | 1151.849 | 10.01009 | 1152.403 |
| 1152.092 | 9.778229 | 1152.51 | 9.949035 | 1151.02  | 9.949035 | 1151.846 | 10.01154 | 1152.4   |
| 1152.09  | 9.78     | 1152.51 | 9.950241 | 1151.018 | 9.950241 | 1151.844 | 10.01335 | 1152.398 |
| 1152.076 | 9.781029 | 1152.51 | 9.9517   | 1151.015 | 9.9517   | 1151.842 | 10.01505 | 1152.395 |
| 1152.074 | 9.788229 | 1152.51 | 9.953012 | 1151.013 | 9.953012 | 1151.84  | 10.01818 | 1152.39  |
| 1152.059 | 9.79     | 1152.51 | 9.954817 | 1151.01  | 9.954817 | 1151.837 | 10.02    | 1152.387 |
| 1152.057 | 9.791029 | 1152.51 | 9.955966 | 1151.008 | 9.955966 | 1151.835 | 10.02109 | 1152.385 |
| 1152.043 | 9.798229 | 1152.51 | 9.957114 | 1151.006 | 9.957114 | 1151.833 | 10.02262 | 1152.383 |
| 1152.041 | 9.8      | 1152.51 | 9.959124 | 1151.003 | 9.959124 | 1151.829 | 10.02386 | 1152.381 |
| 1152.026 | 9.801029 | 1152.51 | 9.960287 | 1151.001 | 9.960287 | 1151.828 | 10.02498 | 1152.379 |
| 1152.024 | 9.808229 | 1152.51 | 9.961663 | 1150.999 | 9.961663 | 1151.825 | 10.0261  | 1152.377 |
| 1152.01  | 9.81     | 1152.51 | 9.963011 | 1150.997 | 9.963011 | 1151.823 | 10.02723 | 1152.376 |

|          |          |         |          |          |          |          |          |          |
|----------|----------|---------|----------|----------|----------|----------|----------|----------|
| 1152.007 | 9.811029 | 1152.51 | 9.964191 | 1150.995 | 9.964191 | 1151.821 | 10.02835 | 1152.374 |
| 1151.993 | 9.818229 | 1152.51 | 9.966255 | 1150.991 | 9.966255 | 1151.818 | 10.02938 | 1152.372 |
| 1151.991 | 9.82     | 1152.51 | 9.968319 | 1150.988 | 9.968319 | 1151.814 | 10.0304  | 1152.371 |
| 1151.977 | 9.821029 | 1152.51 | 9.97     | 1150.985 | 9.97     | 1151.811 | 10.03141 | 1152.369 |
| 1151.974 | 9.828229 | 1152.51 | 9.971146 | 1150.983 | 9.971146 | 1151.81  | 10.03251 | 1152.366 |
| 1151.96  | 9.83     | 1152.51 | 9.972285 | 1150.981 | 9.972285 | 1151.808 | 10.03384 | 1152.363 |
| 1151.958 | 9.831029 | 1152.51 | 9.976312 | 1150.975 | 9.976312 | 1151.801 | 10.03529 | 1152.359 |
| 1151.944 | 9.838229 | 1152.51 | 9.978999 | 1150.97  | 9.978999 | 1151.797 | 10.03644 | 1152.355 |
| 1151.941 | 9.84     | 1152.51 | 9.98     | 1150.969 | 9.98     | 1151.795 | 10.03759 | 1152.351 |
| 1151.927 | 9.841029 | 1152.51 | 9.983071 | 1150.964 | 9.983071 | 1151.79  | 10.03873 | 1152.346 |
| 1151.925 | 9.848229 | 1152.51 | 9.985757 | 1150.959 | 9.985757 | 1151.785 | 10.03988 | 1152.341 |
| 1151.911 | 9.85     | 1152.51 | 9.988175 | 1150.955 | 9.988175 | 1151.781 | 10.04104 | 1152.334 |
| 1151.908 | 9.851029 | 1152.51 | 9.99     | 1150.952 | 9.99     | 1151.778 | 10.04219 | 1152.328 |
| 1151.894 | 9.858229 | 1152.51 | 9.992764 | 1150.947 | 9.992764 | 1151.774 | 10.04325 | 1152.323 |
| 1151.892 | 9.86     | 1152.51 | 9.99486  | 1150.944 | 9.99486  | 1151.77  | 10.04436 | 1152.316 |
| 1151.878 | 9.861029 | 1152.51 | 9.996957 | 1150.941 | 9.996957 | 1151.767 | 10.04579 | 1152.308 |
| 1151.875 | 9.868229 | 1152.51 | 9.999054 | 1150.937 | 9.999054 | 1151.764 | 10.04729 | 1152.298 |
| 1151.861 | 9.87     | 1152.51 | 10.00006 | 1150.935 | 10.00006 | 1151.762 | 10.04833 | 1152.291 |
| 1151.859 | 9.871029 | 1152.51 | 10.00113 | 1150.934 | 10.00113 | 1151.76  | 10.04963 | 1152.283 |
| 1151.845 | 9.878229 | 1152.51 | 10.00227 | 1150.932 | 10.00227 | 1151.758 | 10.05078 | 1152.275 |
| 1151.842 | 9.88     | 1152.51 | 10.0035  | 1150.93  | 10.0035  | 1151.756 | 10.05233 | 1152.264 |
| 1151.828 | 9.881029 | 1152.51 | 10.00564 | 1150.926 | 10.00564 | 1151.753 | 10.05348 | 1152.255 |
| 1151.826 | 9.888229 | 1152.51 | 10.0068  | 1150.924 | 10.0068  | 1151.751 | 10.05505 | 1152.243 |
| 1151.812 | 9.89     | 1152.51 | 10.00797 | 1150.922 | 10.00797 | 1151.749 | 10.05672 | 1152.231 |
| 1151.809 | 9.891029 | 1152.51 | 10.00914 | 1150.92  | 10.00914 | 1151.747 | 10.05814 | 1152.22  |
| 1151.795 | 9.898229 | 1152.51 | 10.01017 | 1150.919 | 10.01017 | 1151.745 | 10.05957 | 1152.209 |
| 1151.793 | 9.89932  | 1152.51 | 10.01156 | 1150.916 | 10.01156 | 1151.743 | 10.06084 | 1152.2   |
| 1151.779 | 9.900407 | 1152.51 | 10.01337 | 1150.913 | 10.01337 | 1151.74  | 10.06201 | 1152.191 |
| 1151.776 | 9.901596 | 1152.51 | 10.01507 | 1150.911 | 10.01507 | 1151.737 | 10.0633  | 1152.181 |
| 1151.773 | 9.903094 | 1152.51 | 10.01821 | 1150.905 | 10.01821 | 1151.732 | 10.06473 | 1152.17  |
| 1151.77  | 9.904696 | 1152.51 | 10.02    | 1150.902 | 10.02    | 1151.729 | 10.06609 | 1152.159 |
| 1151.765 | 9.905716 | 1152.51 | 10.02109 | 1150.901 | 10.02109 | 1151.727 | 10.0673  | 1152.149 |
| 1151.764 | 9.9075   | 1152.51 | 10.02262 | 1150.898 | 10.02262 | 1151.725 | 10.06838 | 1152.14  |
| 1151.762 | 9.909075 | 1152.51 | 10.02387 | 1150.896 | 10.02387 | 1151.723 | 10.06947 | 1152.131 |
| 1151.76  | 9.910092 | 1152.51 | 10.02499 | 1150.894 | 10.02499 | 1151.721 | 10.07056 | 1152.122 |
| 1151.758 | 9.911252 | 1152.51 | 10.02611 | 1150.892 | 10.02611 | 1151.719 | 10.0717  | 1152.112 |
| 1151.755 | 9.913205 | 1152.51 | 10.02723 | 1150.89  | 10.02723 | 1151.717 | 10.0727  | 1152.104 |
| 1151.753 | 9.914299 | 1152.51 | 10.02836 | 1150.889 | 10.02836 | 1151.715 | 10.07391 | 1152.094 |
| 1151.751 | 9.915392 | 1152.51 | 10.0294  | 1150.887 | 10.02941 | 1151.713 | 10.07511 | 1152.083 |
| 1151.749 | 9.916486 | 1152.51 | 10.03045 | 1150.885 | 10.03042 | 1151.712 | 10.07611 | 1152.075 |
| 1151.747 | 9.91758  | 1152.51 | 10.03172 | 1150.883 | 10.03153 | 1151.71  | 10.07719 | 1152.066 |
| 1151.746 | 9.92     | 1152.51 | 10.03302 | 1150.88  | 10.03277 | 1151.707 | 10.07827 | 1152.056 |
| 1151.743 | 9.921337 | 1152.51 | 10.03431 | 1150.876 | 10.03406 | 1151.704 | 10.07946 | 1152.046 |
| 1151.74  | 9.922565 | 1152.51 | 10.0355  | 1150.873 | 10.03528 | 1151.7   | 10.08097 | 1152.033 |
| 1151.737 | 9.923998 | 1152.51 | 10.03693 | 1150.868 | 10.03649 | 1151.696 | 10.08209 | 1152.023 |
| 1151.732 | 9.925253 | 1152.51 | 10.03809 | 1150.863 | 10.0377  | 1151.691 | 10.08322 | 1152.013 |
| 1151.729 | 9.926668 | 1152.51 | 10.03918 | 1150.858 | 10.03891 | 1151.686 | 10.08455 | 1152.001 |



|          |          |          |          |          |          |          |          |          |
|----------|----------|----------|----------|----------|----------|----------|----------|----------|
| 1151.727 | 9.928082 | 1152.51  | 10.0402  | 1150.853 | 10.04    | 1151.681 | 10.08588 | 1151.99  |
| 1151.725 | 9.929096 | 1152.51  | 10.04137 | 1150.847 | 10.04123 | 1151.674 | 10.08721 | 1151.979 |
| 1151.723 | 9.930128 | 1152.51  | 10.04245 | 1150.841 | 10.04246 | 1151.668 | 10.09    | 1151.955 |
| 1151.721 | 9.93114  | 1152.511 | 10.04393 | 1150.833 | 10.04363 | 1151.661 | 10.09169 | 1151.94  |
| 1151.719 | 9.932163 | 1152.511 | 10.04495 | 1150.827 | 10.04494 | 1151.654 | 10.09312 | 1151.928 |
| 1151.717 | 9.933298 | 1152.51  | 10.04633 | 1150.818 | 10.04603 | 1151.647 | 10.09508 | 1151.911 |
| 1151.715 | 9.934425 | 1152.509 | 10.04737 | 1150.812 | 10.04712 | 1151.64  | 10.09633 | 1151.9   |
| 1151.714 | 9.935858 | 1152.509 | 10.0484  | 1150.805 | 10.04834 | 1151.632 | 10.09851 | 1151.881 |
| 1151.712 | 9.937292 | 1152.51  | 10.0497  | 1150.796 | 10.0497  | 1151.623 | 10.1     | 1151.868 |
| 1151.71  | 9.938726 | 1152.509 | 10.05077 | 1150.789 | 10.05078 | 1151.615 | 10.10112 | 1151.858 |
| 1151.707 | 9.94     | 1152.506 | 10.05228 | 1150.778 | 10.05226 | 1151.605 | 10.10254 | 1151.846 |
| 1151.704 | 9.941175 | 1152.505 | 10.0534  | 1150.769 | 10.05336 | 1151.596 | 10.10402 | 1151.833 |
| 1151.7   | 9.942365 | 1152.504 | 10.05494 | 1150.758 | 10.05462 | 1151.587 | 10.10606 | 1151.815 |
| 1151.696 | 9.943556 | 1152.503 | 10.0567  | 1150.745 | 10.05604 | 1151.576 | 10.10736 | 1151.803 |
| 1151.692 | 9.944746 | 1152.502 | 10.05821 | 1150.733 | 10.05733 | 1151.567 | 10.10865 | 1151.792 |
| 1151.686 | 9.945788 | 1152.501 | 10.05965 | 1150.722 | 10.05861 | 1151.557 | 10.11    | 1151.78  |
| 1151.681 | 9.946829 | 1152.499 | 10.06081 | 1150.714 | 10.0599  | 1151.547 | 10.11154 | 1151.767 |
| 1151.674 | 9.947871 | 1152.498 | 10.06195 | 1150.705 | 10.06098 | 1151.539 | 10.11282 | 1151.756 |
| 1151.668 | 9.948912 | 1152.497 | 10.06322 | 1150.695 | 10.06216 | 1151.53  | 10.11459 | 1151.74  |
| 1151.661 | 9.95     | 1152.496 | 10.06462 | 1150.684 | 10.06336 | 1151.521 | 10.11571 | 1151.731 |
| 1151.654 | 9.951408 | 1152.494 | 10.06595 | 1150.674 | 10.06447 | 1151.512 | 10.11683 | 1151.721 |
| 1151.647 | 9.952602 | 1152.492 | 10.06712 | 1150.664 | 10.06558 | 1151.503 | 10.1188  | 1151.704 |
| 1151.64  | 9.954244 | 1152.49  | 10.06816 | 1150.655 | 10.06669 | 1151.494 | 10.12    | 1151.693 |
| 1151.632 | 9.955289 | 1152.488 | 10.0692  | 1150.647 | 10.06818 | 1151.482 | 10.12137 | 1151.682 |
| 1151.623 | 9.956334 | 1152.487 | 10.07028 | 1150.638 | 10.06968 | 1151.469 | 10.1227  | 1151.67  |
| 1151.616 | 9.958163 | 1152.484 | 10.07163 | 1150.626 | 10.07076 | 1151.46  | 10.12387 | 1151.66  |
| 1151.605 | 9.959992 | 1152.481 | 10.07271 | 1150.617 | 10.0718  | 1151.451 | 10.1249  | 1151.651 |
| 1151.597 | 9.961224 | 1152.479 | 10.07393 | 1150.607 | 10.07297 | 1151.442 | 10.12593 | 1151.642 |
| 1151.587 | 9.962378 | 1152.478 | 10.07516 | 1150.596 | 10.07414 | 1151.432 | 10.12695 | 1151.633 |
| 1151.577 | 9.96425  | 1152.475 | 10.07661 | 1150.584 | 10.07574 | 1151.418 | 10.12875 | 1151.617 |
| 1151.567 | 9.965997 | 1152.472 | 10.07799 | 1150.572 | 10.07699 | 1151.407 | 10.13    | 1151.606 |
| 1151.557 | 9.967526 | 1152.47  | 10.0792  | 1150.561 | 10.07824 | 1151.396 | 10.13122 | 1151.596 |
| 1151.547 | 9.97     | 1152.466 | 10.08044 | 1150.55  | 10.07949 | 1151.385 | 10.13238 | 1151.585 |
| 1151.539 | 9.971018 | 1152.464 | 10.0819  | 1150.537 | 10.08065 | 1151.375 | 10.1334  | 1151.577 |
| 1151.53  | 9.972061 | 1152.463 | 10.08322 | 1150.526 | 10.08182 | 1151.365 | 10.13474 | 1151.565 |
| 1151.521 | 9.976895 | 1152.455 | 10.08472 | 1150.513 | 10.08305 | 1151.354 | 10.13632 | 1151.551 |
| 1151.512 | 9.98     | 1152.45  | 10.08622 | 1150.5   | 10.08411 | 1151.345 | 10.13761 | 1151.54  |
| 1151.504 | 9.984738 | 1152.443 | 10.08772 | 1150.487 | 10.08518 | 1151.336 | 10.13882 | 1151.529 |
| 1151.495 | 9.99     | 1152.434 | 10.09    | 1150.467 | 10.08705 | 1151.32  | 10.14    | 1151.519 |
| 1151.482 | 9.994738 | 1152.427 | 10.09178 | 1150.452 | 10.09    | 1151.294 | 10.14139 | 1151.507 |
| 1151.47  | 9.996053 | 1152.425 | 10.09327 | 1150.439 | 10.09106 | 1151.285 | 10.14273 | 1151.495 |
| 1151.461 | 9.998767 | 1152.421 | 10.09532 | 1150.422 | 10.09273 | 1151.271 | 10.14407 | 1151.483 |
| 1151.452 | 9.99991  | 1152.419 | 10.09662 | 1150.41  | 10.09429 | 1151.257 | 10.14541 | 1151.472 |
| 1151.442 | 10.00106 | 1152.417 | 10.09792 | 1150.399 | 10.09565 | 1151.246 | 10.15    | 1151.432 |
| 1151.432 | 10.00284 | 1152.414 | 10.1     | 1150.381 | 10.09701 | 1151.234 | 10.15153 | 1151.418 |
| 1151.418 | 10.0044  | 1152.412 | 10.10164 | 1150.366 | 10.09838 | 1151.222 | 10.153   | 1151.406 |
| 1151.407 | 10.00636 | 1152.409 | 10.10301 | 1150.354 | 10.1     | 1151.207 | 10.15446 | 1151.393 |

|          |          |          |          |          |          |          |          |          |
|----------|----------|----------|----------|----------|----------|----------|----------|----------|
| 1151.396 | 10.00753 | 1152.407 | 10.10491 | 1150.337 | 10.10167 | 1151.193 | 10.15592 | 1151.38  |
| 1151.385 | 10.0087  | 1152.405 | 10.10611 | 1150.327 | 10.10307 | 1151.18  | 10.16    | 1151.344 |
| 1151.375 | 10.00988 | 1152.403 | 10.10732 | 1150.316 | 10.10499 | 1151.164 | 10.16167 | 1151.33  |
| 1151.365 | 10.01089 | 1152.401 | 10.10943 | 1150.298 | 10.10621 | 1151.153 | 10.16326 | 1151.316 |
| 1151.354 | 10.0124  | 1152.399 | 10.11057 | 1150.287 | 10.10743 | 1151.142 | 10.16484 | 1151.302 |
| 1151.345 | 10.01391 | 1152.397 | 10.11236 | 1150.272 | 10.10957 | 1151.123 | 10.16643 | 1151.288 |
| 1151.335 | 10.01571 | 1152.394 | 10.11369 | 1150.26  | 10.11058 | 1151.115 | 10.17    | 1151.257 |
| 1151.319 | 10.01751 | 1152.391 | 10.11553 | 1150.244 | 10.11237 | 1151.099 | 10.17181 | 1151.241 |
| 1151.295 | 10.01932 | 1152.388 | 10.11671 | 1150.234 | 10.11371 | 1151.087 | 10.17352 | 1151.226 |
| 1151.285 | 10.02041 | 1152.386 | 10.11788 | 1150.224 | 10.11555 | 1151.071 | 10.17523 | 1151.211 |
| 1151.271 | 10.02164 | 1152.384 | 10.11993 | 1150.206 | 10.11672 | 1151.061 | 10.17693 | 1151.196 |
| 1151.257 | 10.02289 | 1152.383 | 10.12097 | 1150.197 | 10.11789 | 1151.051 | 10.18    | 1151.17  |
| 1151.245 | 10.02429 | 1152.38  | 10.12215 | 1150.187 | 10.11994 | 1151.033 | 10.18195 | 1151.153 |
| 1151.232 | 10.02549 | 1152.378 | 10.12332 | 1150.176 | 10.12097 | 1151.024 | 10.18378 | 1151.137 |
| 1151.22  | 10.02669 | 1152.376 | 10.12494 | 1150.162 | 10.12215 | 1151.014 | 10.18561 | 1151.121 |
| 1151.208 | 10.0279  | 1152.375 | 10.12596 | 1150.153 | 10.12332 | 1151.004 | 10.18743 | 1151.105 |
| 1151.193 | 10.02904 | 1152.373 | 10.12699 | 1150.144 | 10.12494 | 1150.99  | 10.19    | 1151.082 |
| 1151.18  | 10.03004 | 1152.371 | 10.12879 | 1150.129 | 10.12596 | 1150.981 | 10.19209 | 1151.064 |
| 1151.163 | 10.03105 | 1152.369 | 10.13    | 1150.118 | 10.12699 | 1150.972 | 10.19404 | 1151.047 |
| 1151.151 | 10.0322  | 1152.367 | 10.13122 | 1150.107 | 10.12879 | 1150.956 | 10.19599 | 1151.03  |
| 1151.14  | 10.03335 | 1152.364 | 10.13238 | 1150.097 | 10.13    | 1150.945 | 10.19794 | 1151.013 |
| 1151.121 | 10.03481 | 1152.36  | 10.1334  | 1150.088 | 10.13122 | 1150.935 | 10.2     | 1150.995 |
| 1151.11  | 10.03587 | 1152.357 | 10.13463 | 1150.077 | 10.13238 | 1150.924 | 10.20223 | 1150.975 |
| 1151.099 | 10.03701 | 1152.353 | 10.13631 | 1150.063 | 10.1334  | 1150.915 | 10.2043  | 1150.957 |
| 1151.087 | 10.03816 | 1152.349 | 10.13792 | 1150.048 | 10.13463 | 1150.905 | 10.20637 | 1150.939 |
| 1151.07  | 10.03931 | 1152.343 | 10.14    | 1150.03  | 10.13631 | 1150.89  | 10.20844 | 1150.921 |
| 1151.06  | 10.04041 | 1152.338 | 10.1423  | 1150.01  | 10.13791 | 1150.876 | 10.21    | 1150.907 |
| 1151.049 | 10.04156 | 1152.332 | 10.14363 | 1149.999 | 10.14    | 1150.858 | 10.21237 | 1150.887 |
| 1151.033 | 10.04257 | 1152.326 | 10.14496 | 1149.987 | 10.14229 | 1150.838 | 10.21456 | 1150.867 |
| 1151.021 | 10.04385 | 1152.319 | 10.14962 | 1149.946 | 10.14362 | 1150.826 | 10.21675 | 1150.848 |
| 1151.011 | 10.04487 | 1152.313 | 10.15067 | 1149.937 | 10.14495 | 1150.815 | 10.21894 | 1150.829 |
| 1150.997 | 10.04625 | 1152.305 | 10.15267 | 1149.92  | 10.1496  | 1150.774 | 10.22    | 1150.82  |
| 1150.988 | 10.04729 | 1152.298 | 10.15394 | 1149.908 | 10.15066 | 1150.765 | 10.2225  | 1150.798 |
| 1150.979 | 10.04833 | 1152.291 | 10.15617 | 1149.889 | 10.15266 | 1150.747 | 10.22482 | 1150.778 |
| 1150.963 | 10.04963 | 1152.283 | 10.15813 | 1149.872 | 10.15393 | 1150.736 | 10.22713 | 1150.757 |
| 1150.946 | 10.05078 | 1152.275 | 10.16    | 1149.855 | 10.15616 | 1150.717 | 10.22944 | 1150.737 |
| 1150.935 | 10.05233 | 1152.264 | 10.16224 | 1149.836 | 10.15812 | 1150.7   | 10.23264 | 1150.709 |
| 1150.924 | 10.05348 | 1152.255 | 10.1642  | 1149.818 | 10.16    | 1150.683 | 10.23507 | 1150.688 |
| 1150.915 | 10.05505 | 1152.243 | 10.16596 | 1149.803 | 10.16224 | 1150.664 | 10.23751 | 1150.667 |
| 1150.9   | 10.05672 | 1152.231 | 10.16773 | 1149.788 | 10.1642  | 1150.646 | 10.23994 | 1150.645 |
| 1150.89  | 10.05814 | 1152.22  | 10.16949 | 1149.772 | 10.16596 | 1150.631 | 10.24278 | 1150.62  |
| 1150.87  | 10.05957 | 1152.209 | 10.17202 | 1149.75  | 10.16772 | 1150.616 | 10.24533 | 1150.598 |
| 1150.858 | 10.06084 | 1152.2   | 10.17376 | 1149.735 | 10.16948 | 1150.6   | 10.24788 | 1150.576 |
| 1150.845 | 10.06201 | 1152.191 | 10.17551 | 1149.719 | 10.17201 | 1150.578 | 10.25    | 1150.557 |
| 1150.833 | 10.0633  | 1152.181 | 10.17733 | 1149.703 | 10.17376 | 1150.563 | 10.25292 | 1150.532 |
| 1150.821 | 10.06473 | 1152.17  | 10.17858 | 1149.691 | 10.17551 | 1150.547 | 10.25559 | 1150.508 |
| 1150.809 | 10.06609 | 1152.159 | 10.17983 | 1149.678 | 10.17725 | 1150.532 | 10.25826 | 1150.485 |

|          |          |          |          |          |          |          |          |          |
|----------|----------|----------|----------|----------|----------|----------|----------|----------|
| 1150.771 | 10.0673  | 1152.149 | 10.18143 | 1149.661 | 10.18    | 1150.508 | 10.26    | 1150.47  |
| 1150.757 | 10.06838 | 1152.14  | 10.18246 | 1149.648 | 10.18199 | 1150.491 | 10.26305 | 1150.443 |
| 1150.744 | 10.06947 | 1152.131 | 10.18348 | 1149.633 | 10.18386 | 1150.474 | 10.26585 | 1150.418 |
| 1150.731 | 10.07057 | 1152.122 | 10.18451 | 1149.616 | 10.18572 | 1150.458 | 10.26864 | 1150.394 |
| 1150.718 | 10.0717  | 1152.112 | 10.1881  | 1149.549 | 10.18758 | 1150.442 | 10.27    | 1150.382 |
| 1150.683 | 10.0727  | 1152.104 | 10.19    | 1149.507 | 10.19    | 1150.421 | 10.27319 | 1150.354 |
| 1150.669 | 10.07391 | 1152.094 | 10.19171 | 1149.467 | 10.19213 | 1150.402 | 10.2761  | 1150.328 |
| 1150.654 | 10.07511 | 1152.083 | 10.19381 | 1149.416 | 10.19412 | 1150.385 | 10.27901 | 1150.303 |
| 1150.64  | 10.07611 | 1152.075 | 10.19481 | 1149.39  | 10.1961  | 1150.367 | 10.28042 | 1150.291 |
| 1150.626 | 10.07719 | 1152.065 | 10.19581 | 1149.364 | 10.19809 | 1150.35  | 10.28333 | 1150.265 |
| 1150.596 | 10.07828 | 1152.056 | 10.19681 | 1149.338 | 10.2     | 1150.333 | 10.28636 | 1150.239 |
| 1150.58  | 10.07947 | 1152.046 | 10.19856 | 1149.29  | 10.20227 | 1150.313 | 10.28939 | 1150.212 |
| 1150.565 | 10.08097 | 1152.033 | 10.2     | 1149.248 | 10.20439 | 1150.295 | 10.29043 | 1150.203 |
| 1150.549 | 10.0821  | 1152.023 | 10.20114 | 1149.213 | 10.2065  | 1150.276 | 10.29346 | 1150.176 |
| 1150.534 | 10.08323 | 1152.013 | 10.20303 | 1149.152 | 10.20862 | 1150.258 | 10.29662 | 1150.149 |
| 1150.508 | 10.08456 | 1152.001 | 10.20481 | 1149.091 | 10.21    | 1150.245 | 10.29977 | 1150.121 |
| 1150.491 | 10.08589 | 1151.99  | 10.20638 | 1149.035 | 10.21242 | 1150.224 | 10.3036  | 1150.087 |
| 1150.475 | 10.08723 | 1151.978 | 10.20794 | 1148.976 | 10.21466 | 1150.205 | 10.30687 | 1150.059 |
| 1150.458 | 10.09    | 1151.955 | 10.2095  | 1148.916 | 10.2169  | 1150.185 | 10.31    | 1150.031 |
| 1150.442 | 10.09172 | 1151.94  | 10.21054 | 1148.875 | 10.21914 | 1150.165 | 10.31374 | 1149.999 |
| 1150.421 | 10.09318 | 1151.928 | 10.21204 | 1148.813 | 10.22032 | 1150.155 | 10.31672 | 1149.972 |
| 1150.402 | 10.09517 | 1151.91  | 10.21376 | 1148.741 | 10.22256 | 1150.135 | 10.3179  | 1149.962 |
| 1150.385 | 10.09645 | 1151.899 | 10.21613 | 1148.637 | 10.22493 | 1150.115 | 10.31965 | 1149.945 |
| 1150.367 | 10.09867 | 1151.88  | 10.21764 | 1148.569 | 10.2273  | 1150.094 | 10.322   | 1149.922 |
| 1150.35  | 10.1     | 1151.868 | 10.22    | 1148.458 | 10.22966 | 1150.073 | 10.32375 | 1149.898 |
| 1150.333 | 10.10115 | 1151.858 | 10.22108 | 1148.405 | 10.23271 | 1150.046 | 10.32514 | 1149.877 |
| 1150.313 | 10.10261 | 1151.845 | 10.223   | 1148.307 | 10.2352  | 1150.025 | 10.32653 | 1149.854 |
| 1150.295 | 10.10414 | 1151.832 | 10.22565 | 1148.168 | 10.23769 | 1150.003 | 10.32792 | 1149.827 |
| 1150.276 | 10.10624 | 1151.813 | 10.22733 | 1148.076 | 10.24    | 1149.982 | 10.33    | 1149.786 |
| 1150.258 | 10.10757 | 1151.802 | 10.22902 | 1147.982 | 10.24285 | 1149.957 | 10.33159 | 1149.752 |
| 1150.246 | 10.10891 | 1151.79  | 10.23024 | 1147.913 | 10.24547 | 1149.934 | 10.33298 | 1149.72  |
| 1150.225 | 10.11    | 1151.78  | 10.2322  | 1147.798 | 10.24809 | 1149.911 | 10.33405 | 1149.694 |
| 1150.205 | 10.11158 | 1151.766 | 10.23405 | 1147.686 | 10.25    | 1149.895 | 10.33512 | 1149.668 |
| 1150.185 | 10.11291 | 1151.755 | 10.2366  | 1147.528 | 10.253   | 1149.868 | 10.33619 | 1149.642 |
| 1150.166 | 10.11472 | 1151.739 | 10.23822 | 1147.424 | 10.25459 | 1149.854 | 10.34    | 1149.541 |
| 1150.155 | 10.11588 | 1151.729 | 10.24    | 1147.308 | 10.25577 | 1149.843 | 10.341   | 1149.513 |
| 1150.136 | 10.11704 | 1151.719 | 10.24119 | 1147.228 | 10.25765 | 1149.824 | 10.34259 | 1149.465 |
| 1150.115 | 10.11906 | 1151.702 | 10.24225 | 1147.155 | 10.25922 | 1149.804 | 10.34479 | 1149.396 |
| 1150.094 | 10.12029 | 1151.691 | 10.24331 | 1147.082 | 10.26022 | 1149.791 | 10.34723 | 1149.313 |
| 1150.073 | 10.12141 | 1151.681 | 10.24437 | 1147.007 | 10.2618  | 1149.768 | 10.34943 | 1149.234 |
| 1150.047 | 10.12277 | 1151.669 | 10.24623 | 1146.875 | 10.26337 | 1149.74  | 10.35069 | 1149.186 |
| 1150.025 | 10.12397 | 1151.659 | 10.24809 | 1146.739 | 10.26456 | 1149.718 | 10.3525  | 1149.116 |
| 1150.003 | 10.12502 | 1151.65  | 10.24995 | 1146.601 | 10.26574 | 1149.693 | 10.35354 | 1149.074 |
| 1149.983 | 10.12607 | 1151.641 | 10.25131 | 1146.498 | 10.26693 | 1149.668 | 10.35457 | 1149.032 |
| 1149.958 | 10.12711 | 1151.632 | 10.25248 | 1146.408 | 10.27    | 1149.598 | 10.35561 | 1148.989 |
| 1149.935 | 10.12895 | 1151.615 | 10.25365 | 1146.316 | 10.27136 | 1149.566 | 10.35743 | 1148.912 |
| 1149.912 | 10.13    | 1151.606 | 10.25482 | 1146.223 | 10.27254 | 1149.536 | 10.35924 | 1148.832 |

|          |          |          |          |          |          |          |          |          |
|----------|----------|----------|----------|----------|----------|----------|----------|----------|
| 1149.895 | 10.13124 | 1151.595 | 10.25686 | 1146.059 | 10.27445 | 1149.487 | 10.36026 | 1148.786 |
| 1149.869 | 10.13242 | 1151.585 | 10.2589  | 1145.891 | 10.27952 | 1149.34  | 10.36231 | 1148.689 |
| 1149.854 | 10.13346 | 1151.576 | 10.26    | 1145.799 | 10.28059 | 1149.306 | 10.36426 | 1148.594 |
| 1149.844 | 10.13527 | 1151.56  | 10.26143 | 1145.677 | 10.28184 | 1149.264 | 10.36694 | 1148.458 |
| 1149.824 | 10.13632 | 1151.551 | 10.2627  | 1145.567 | 10.28342 | 1149.209 | 10.36864 | 1148.368 |
| 1149.804 | 10.13732 | 1151.542 | 10.26385 | 1145.467 | 10.28481 | 1149.159 | 10.37    | 1148.296 |
| 1149.769 | 10.13926 | 1151.525 | 10.26499 | 1145.366 | 10.2862  | 1149.107 | 10.37122 | 1148.229 |
| 1149.741 | 10.14165 | 1151.504 | 10.26613 | 1145.263 | 10.28863 | 1149.013 | 10.3723  | 1148.168 |
| 1149.718 | 10.14301 | 1151.493 | 10.26813 | 1145.082 | 10.29    | 1148.958 | 10.37338 | 1148.106 |
| 1149.694 | 10.14437 | 1151.481 | 10.27    | 1144.91  | 10.29138 | 1148.9   | 10.37446 | 1148.044 |
| 1149.668 | 10.14572 | 1151.469 | 10.27148 | 1144.771 | 10.29254 | 1148.851 | 10.37636 | 1147.932 |
| 1149.599 | 10.15    | 1151.432 | 10.2728  | 1144.645 | 10.29453 | 1148.764 | 10.37825 | 1147.818 |
| 1149.567 | 10.15155 | 1151.418 | 10.27413 | 1144.516 | 10.29726 | 1148.638 | 10.38    | 1147.71  |
| 1149.537 | 10.15302 | 1151.405 | 10.27546 | 1144.386 | 10.299   | 1148.555 | 10.38131 | 1147.627 |
| 1149.487 | 10.15448 | 1151.393 | 10.27778 | 1144.156 | 10.30025 | 1148.493 | 10.38247 | 1147.551 |
| 1149.341 | 10.15595 | 1151.38  | 10.28    | 1143.932 | 10.30224 | 1148.392 | 10.38352 | 1147.483 |
| 1149.306 | 10.16    | 1151.344 | 10.28165 | 1143.762 | 10.30413 | 1148.292 | 10.38456 | 1147.413 |
| 1149.265 | 10.16167 | 1151.33  | 10.28312 | 1143.608 | 10.30673 | 1148.15  | 10.38561 | 1147.343 |
| 1149.21  | 10.16326 | 1151.316 | 10.28459 | 1143.453 | 10.30838 | 1148.057 | 10.38743 | 1147.218 |
| 1149.16  | 10.16484 | 1151.302 | 10.28606 | 1143.295 | 10.31    | 1147.964 | 10.38926 | 1147.09  |
| 1149.108 | 10.16643 | 1151.288 | 10.28864 | 1143.015 | 10.31119 | 1147.894 | 10.39026 | 1147.019 |
| 1149.014 | 10.17    | 1151.257 | 10.29    | 1142.865 | 10.31225 | 1147.83  | 10.39133 | 1146.942 |
| 1148.958 | 10.17181 | 1151.241 | 10.2918  | 1142.663 | 10.31331 | 1147.766 | 10.39253 | 1146.854 |
| 1148.901 | 10.17352 | 1151.226 | 10.29341 | 1142.481 | 10.31437 | 1147.7   | 10.39372 | 1146.766 |
| 1148.852 | 10.17523 | 1151.211 | 10.29485 | 1142.316 | 10.31622 | 1147.584 | 10.39491 | 1146.676 |
| 1148.764 | 10.17693 | 1151.196 | 10.29629 | 1142.148 | 10.31808 | 1147.464 | 10.397   | 1146.516 |
| 1148.639 | 10.18    | 1151.17  | 10.29773 | 1141.979 | 10.31993 | 1147.341 | 10.39909 | 1146.353 |
| 1148.556 | 10.18195 | 1151.153 | 10.3     | 1141.709 | 10.3213  | 1147.249 | 10.4003  | 1146.257 |
| 1148.494 | 10.18378 | 1151.137 | 10.30165 | 1141.511 | 10.32245 | 1147.169 | 10.40147 | 1146.162 |
| 1148.393 | 10.18561 | 1151.121 | 10.30298 | 1141.347 | 10.32348 | 1147.097 | 10.40278 | 1146.055 |
| 1148.293 | 10.18743 | 1151.105 | 10.30432 | 1141.182 | 10.32451 | 1147.024 | 10.40396 | 1145.957 |
| 1148.151 | 10.19    | 1151.082 | 10.30566 | 1141.016 | 10.32555 | 1146.949 | 10.40514 | 1145.858 |
| 1148.058 | 10.19209 | 1151.064 | 10.31    | 1140.465 | 10.32736 | 1146.818 | 10.40632 | 1145.758 |
| 1147.965 | 10.19404 | 1151.047 | 10.31153 | 1140.268 | 10.32917 | 1146.684 | 10.40838 | 1145.58  |
| 1147.895 | 10.19599 | 1151.03  | 10.31295 | 1140.082 | 10.33026 | 1146.601 | 10.41    | 1145.438 |
| 1147.832 | 10.19794 | 1151.013 | 10.31437 | 1139.895 | 10.33133 | 1146.52  | 10.41152 | 1145.303 |
| 1147.767 | 10.2     | 1150.995 | 10.31578 | 1139.705 | 10.33252 | 1146.427 | 10.41289 | 1145.179 |
| 1147.701 | 10.20223 | 1150.975 | 10.32    | 1139.134 | 10.33371 | 1146.333 | 10.41426 | 1145.054 |
| 1147.585 | 10.2043  | 1150.957 | 10.32162 | 1138.91  | 10.3349  | 1146.238 | 10.41562 | 1144.927 |
| 1147.465 | 10.20637 | 1150.939 | 10.32314 | 1138.698 | 10.33699 | 1146.069 | 10.41801 | 1144.702 |
| 1147.343 | 10.20844 | 1150.921 | 10.32465 | 1138.483 | 10.33907 | 1145.897 | 10.42    | 1144.511 |
| 1147.25  | 10.21    | 1150.907 | 10.32617 | 1138.267 | 10.3403  | 1145.794 | 10.4217  | 1144.346 |
| 1147.171 | 10.21237 | 1150.887 | 10.33    | 1137.713 | 10.34148 | 1145.693 | 10.42321 | 1144.196 |
| 1147.098 | 10.21456 | 1150.867 | 10.33173 | 1137.459 | 10.34279 | 1145.579 | 10.42472 | 1144.044 |
| 1147.025 | 10.21675 | 1150.848 | 10.33335 | 1137.218 | 10.34411 | 1145.463 | 10.42623 | 1143.89  |
| 1146.951 | 10.21894 | 1150.829 | 10.33497 | 1136.975 | 10.34542 | 1145.346 | 10.42887 | 1143.618 |
| 1146.819 | 10.22    | 1150.82  | 10.33658 | 1136.73  | 10.34773 | 1145.139 | 10.43    | 1143.499 |

|          |          |          |          |          |          |          |          |          |
|----------|----------|----------|----------|----------|----------|----------|----------|----------|
| 1146.685 | 10.2225  | 1150.798 | 10.34    | 1136.205 | 10.35    | 1144.929 | 10.43185 | 1143.303 |
| 1146.603 | 10.22482 | 1150.778 | 10.34185 | 1135.918 | 10.35161 | 1144.778 | 10.43349 | 1143.126 |
| 1146.521 | 10.22713 | 1150.757 | 10.34357 | 1135.646 | 10.35304 | 1144.641 | 10.43496 | 1142.965 |
| 1146.428 | 10.22944 | 1150.737 | 10.34529 | 1135.372 | 10.35433 | 1144.517 | 10.43644 | 1142.802 |
| 1146.334 | 10.23264 | 1150.709 | 10.347   | 1135.095 | 10.35562 | 1144.391 | 10.43791 | 1142.638 |
| 1146.239 | 10.23507 | 1150.688 | 10.35    | 1134.609 | 10.3569  | 1144.264 | 10.44    | 1142.402 |
| 1146.071 | 10.23751 | 1150.667 | 10.35196 | 1134.286 | 10.35915 | 1144.038 | 10.44169 | 1142.21  |
| 1145.898 | 10.23994 | 1150.645 | 10.35379 | 1133.981 | 10.36032 | 1143.92  | 10.44305 | 1142.052 |
| 1145.795 | 10.24278 | 1150.62  | 10.35561 | 1133.674 | 10.36166 | 1143.782 | 10.44441 | 1141.892 |
| 1145.694 | 10.24533 | 1150.598 | 10.35744 | 1133.364 | 10.36315 | 1143.627 | 10.44578 | 1141.731 |
| 1145.58  | 10.24788 | 1150.576 | 10.36    | 1132.924 | 10.36464 | 1143.47  | 10.45    | 1141.223 |
| 1145.465 | 10.25    | 1150.557 | 10.36208 | 1132.563 | 10.36613 | 1143.31  | 10.45156 | 1141.032 |
| 1145.348 | 10.25292 | 1150.532 | 10.36402 | 1132.224 | 10.36874 | 1143.028 | 10.45301 | 1140.852 |
| 1145.141 | 10.25559 | 1150.508 | 10.36595 | 1131.881 | 10.37    | 1142.89  | 10.45445 | 1140.67  |
| 1144.931 | 10.25826 | 1150.485 | 10.36788 | 1131.535 | 10.37185 | 1142.684 | 10.4559  | 1140.487 |
| 1144.78  | 10.26    | 1150.47  | 10.37    | 1131.152 | 10.37349 | 1142.498 | 10.46    | 1139.959 |
| 1144.643 | 10.26305 | 1150.443 | 10.37221 | 1130.751 | 10.37514 | 1142.309 | 10.46165 | 1139.743 |
| 1144.519 | 10.26585 | 1150.418 | 10.37425 | 1130.374 | 10.37678 | 1142.118 | 10.4632  | 1139.538 |
| 1144.393 | 10.26864 | 1150.394 | 10.37629 | 1129.993 | 10.37966 | 1141.78  | 10.46474 | 1139.33  |
| 1144.266 | 10.27    | 1150.382 | 10.37833 | 1129.609 | 10.38099 | 1141.621 | 10.46629 | 1139.121 |
| 1144.04  | 10.27319 | 1150.354 | 10.38    | 1129.292 | 10.38201 | 1141.498 | 10.47    | 1138.611 |
| 1143.922 | 10.2761  | 1150.328 | 10.38233 | 1128.847 | 10.3838  | 1141.281 | 10.47177 | 1138.366 |
| 1143.784 | 10.27901 | 1150.303 | 10.38448 | 1128.431 | 10.3854  | 1141.082 | 10.47341 | 1138.133 |
| 1143.629 | 10.28042 | 1150.291 | 10.38663 | 1128.01  | 10.38701 | 1140.882 | 10.47506 | 1137.898 |
| 1143.472 | 10.28333 | 1150.265 | 10.38878 | 1127.586 | 10.38861 | 1140.68  | 10.47671 | 1137.66  |
| 1143.313 | 10.28636 | 1150.239 | 10.39    | 1127.344 | 10.39    | 1140.503 | 10.48    | 1137.18  |
| 1143.03  | 10.28939 | 1150.212 | 10.39246 | 1126.854 | 10.39183 | 1140.268 | 10.48188 | 1136.902 |
| 1142.892 | 10.29043 | 1150.203 | 10.39472 | 1126.396 | 10.39331 | 1140.075 | 10.48363 | 1136.639 |
| 1142.686 | 10.29346 | 1150.176 | 10.39699 | 1125.932 | 10.39479 | 1139.881 | 10.48539 | 1136.374 |
| 1142.5   | 10.29662 | 1150.149 | 10.39925 | 1125.465 | 10.39627 | 1139.684 | 10.48714 | 1136.106 |
| 1142.311 | 10.29977 | 1150.121 | 10.40032 | 1125.242 | 10.4     | 1139.183 | 10.49    | 1135.665 |
| 1142.12  | 10.3036  | 1150.087 | 10.40259 | 1124.771 | 10.40169 | 1138.952 | 10.492   | 1135.352 |
| 1141.782 | 10.30687 | 1150.059 | 10.40497 | 1124.268 | 10.40326 | 1138.734 | 10.49386 | 1135.058 |
| 1141.623 | 10.31    | 1150.031 | 10.40735 | 1123.759 | 10.40482 | 1138.515 | 10.49572 | 1134.76  |
| 1141.501 | 10.31374 | 1149.999 | 10.40973 | 1123.246 | 10.40639 | 1138.294 | 10.49758 | 1134.46  |
| 1141.283 | 10.31671 | 1149.972 | 10.41272 | 1122.597 | 10.41    | 1137.776 | 10.5     | 1134.066 |
| 1141.085 | 10.3179  | 1149.962 | 10.41522 | 1122.047 | 10.41179 | 1137.517 | 10.50212 | 1133.717 |
| 1140.885 | 10.31965 | 1149.945 | 10.41772 | 1121.491 | 10.41346 | 1137.271 | 10.50409 | 1133.388 |
| 1140.682 | 10.322   | 1149.922 | 10.42    | 1120.978 | 10.41512 | 1137.023 | 10.50606 | 1133.056 |
| 1140.505 | 10.32375 | 1149.898 | 10.42285 | 1120.334 | 10.41679 | 1136.772 | 10.50803 | 1132.72  |
| 1140.271 | 10.32514 | 1149.877 | 10.42547 | 1119.734 | 10.42    | 1136.284 | 10.51    | 1132.384 |
| 1140.078 | 10.32653 | 1149.854 | 10.42809 | 1119.128 | 10.42191 | 1135.991 | 10.51225 | 1131.995 |
| 1139.883 | 10.32792 | 1149.827 | 10.43    | 1118.683 | 10.42368 | 1135.715 | 10.51433 | 1131.63  |
| 1139.687 | 10.33    | 1149.786 | 10.43299 | 1117.982 | 10.42545 | 1135.435 | 10.51642 | 1131.261 |
| 1139.185 | 10.33159 | 1149.751 | 10.43573 | 1117.33  | 10.42722 | 1135.153 | 10.5185  | 1130.888 |
| 1138.954 | 10.33298 | 1149.72  | 10.43847 | 1116.671 | 10.43    | 1134.707 | 10.52    | 1130.618 |
| 1138.737 | 10.33405 | 1149.694 | 10.44    | 1116.301 | 10.43203 | 1134.378 | 10.52238 | 1130.187 |

|          |          |          |          |          |          |          |          |          |
|----------|----------|----------|----------|----------|----------|----------|----------|----------|
| 1138.518 | 10.33512 | 1149.668 | 10.44313 | 1115.541 | 10.4339  | 1134.068 | 10.52458 | 1129.783 |
| 1138.296 | 10.33619 | 1149.642 | 10.446   | 1114.833 | 10.43578 | 1133.755 | 10.52678 | 1129.375 |
| 1137.779 | 10.34    | 1149.541 | 10.44886 | 1114.118 | 10.43766 | 1133.439 | 10.52897 | 1128.962 |
| 1137.519 | 10.341   | 1149.513 | 10.45    | 1113.833 | 10.44    | 1133.044 | 10.53    | 1128.769 |
| 1137.274 | 10.34259 | 1149.465 | 10.45327 | 1113.01  | 10.44215 | 1132.677 | 10.53251 | 1128.294 |
| 1137.025 | 10.34479 | 1149.396 | 10.45627 | 1112.244 | 10.44414 | 1132.331 | 10.53483 | 1127.848 |
| 1136.775 | 10.34723 | 1149.313 | 10.45926 | 1111.471 | 10.44613 | 1131.983 | 10.53714 | 1127.398 |
| 1136.287 | 10.34943 | 1149.234 | 10.46043 | 1111.168 | 10.44812 | 1131.63  | 10.53946 | 1126.944 |
| 1135.994 | 10.35069 | 1149.186 | 10.46342 | 1110.389 | 10.45    | 1131.295 | 10.54265 | 1126.315 |
| 1135.718 | 10.3525  | 1149.116 | 10.46654 | 1109.563 | 10.45227 | 1130.887 | 10.54508 | 1125.825 |
| 1135.438 | 10.35354 | 1149.074 | 10.46967 | 1108.728 | 10.45438 | 1130.504 | 10.54752 | 1125.331 |
| 1135.156 | 10.35457 | 1149.032 | 10.47357 | 1107.679 | 10.45648 | 1130.117 | 10.54996 | 1124.832 |
| 1134.71  | 10.35561 | 1148.989 | 10.47683 | 1106.789 | 10.45858 | 1129.727 | 10.55279 | 1124.25  |
| 1134.381 | 10.35743 | 1148.912 | 10.48    | 1105.912 | 10.46    | 1129.461 | 10.55535 | 1123.714 |
| 1134.071 | 10.35924 | 1148.832 | 10.48372 | 1104.879 | 10.4624  | 1129.01  | 10.55791 | 1123.173 |
| 1133.758 | 10.36026 | 1148.786 | 10.48711 | 1103.922 | 10.46462 | 1128.587 | 10.56    | 1122.727 |
| 1133.443 | 10.36231 | 1148.689 | 10.49    | 1103.1   | 10.46683 | 1128.159 | 10.56293 | 1122.1   |
| 1133.047 | 10.36426 | 1148.594 | 10.49388 | 1101.991 | 10.46905 | 1127.728 | 10.56561 | 1121.515 |
| 1132.68  | 10.36694 | 1148.458 | 10.49741 | 1100.962 | 10.47032 | 1127.48  | 10.5683  | 1120.924 |
| 1132.335 | 10.36864 | 1148.368 | 10.5     | 1100.203 | 10.47253 | 1127.045 | 10.57    | 1120.548 |
| 1131.986 | 10.37    | 1148.295 | 10.50404 | 1099.012 | 10.47487 | 1126.579 | 10.57307 | 1119.865 |
| 1131.634 | 10.37122 | 1148.229 | 10.50772 | 1097.908 | 10.4772  | 1126.109 | 10.57589 | 1119.228 |
| 1131.298 | 10.3723  | 1148.168 | 10.51    | 1097.22  | 10.47953 | 1125.634 | 10.57871 | 1118.585 |
| 1130.891 | 10.37338 | 1148.106 | 10.51421 | 1095.943 | 10.48267 | 1124.992 | 10.58    | 1118.288 |
| 1130.508 | 10.37446 | 1148.044 | 10.52    | 1094.146 | 10.48512 | 1124.481 | 10.58322 | 1117.545 |
| 1130.121 | 10.37636 | 1147.932 | 10.52421 | 1092.833 | 10.48757 | 1123.966 | 10.58617 | 1116.854 |
| 1129.73  | 10.37825 | 1147.818 | 10.52665 | 1092.062 | 10.49    | 1123.45  | 10.58912 | 1116.155 |
| 1129.465 | 10.38    | 1147.71  | 10.52877 | 1091.396 | 10.4928  | 1122.852 | 10.59042 | 1115.845 |
| 1129.014 | 10.38131 | 1147.627 | 10.53    | 1091.008 | 10.49538 | 1122.294 | 10.59337 | 1115.141 |
| 1128.59  | 10.38247 | 1147.551 | 10.53207 | 1090.358 | 10.49795 | 1121.729 | 10.59646 | 1114.391 |
| 1128.163 | 10.38352 | 1147.483 | 10.53388 | 1089.793 | 10.5     | 1121.278 | 10.59954 | 1113.634 |
| 1127.732 | 10.38456 | 1147.413 | 10.53535 | 1089.336 | 10.50294 | 1120.625 | 10.60353 | 1112.65  |
| 1127.484 | 10.38561 | 1147.342 | 10.53682 | 1088.88  | 10.50564 | 1120.016 | 10.60675 | 1111.84  |
| 1127.049 | 10.38743 | 1147.217 | 10.53814 | 1088.47  | 10.50834 | 1119.401 | 10.60997 | 1111.022 |
| 1126.583 | 10.38926 | 1147.09  | 10.53946 | 1088.061 | 10.51    | 1119.022 | 10.61368 | 1110.075 |
| 1126.113 | 10.39026 | 1147.019 | 10.54138 | 1087.47  | 10.51309 | 1118.311 | 10.61705 | 1109.2   |
| 1125.638 | 10.39133 | 1146.941 | 10.54323 | 1086.901 | 10.51591 | 1117.649 | 10.62    | 1108.427 |
| 1124.996 | 10.39253 | 1146.854 | 10.54739 | 1085.628 | 10.51874 | 1116.98  | 10.62385 | 1107.414 |
| 1124.486 | 10.39372 | 1146.765 | 10.55    | 1084.833 | 10.52    | 1116.681 | 10.62736 | 1106.473 |
| 1123.97  | 10.39491 | 1146.675 | 10.5515  | 1084.379 | 10.52323 | 1115.91  | 10.63    | 1105.759 |
| 1123.454 | 10.397   | 1146.516 | 10.55281 | 1083.982 | 10.52619 | 1115.192 | 10.63401 | 1104.669 |
| 1122.856 | 10.39909 | 1146.353 | 10.55396 | 1083.634 | 10.52915 | 1114.467 | 10.63768 | 1103.655 |
| 1122.298 | 10.4003  | 1146.257 | 10.55598 | 1083.028 | 10.53042 | 1114.153 | 10.64    | 1103.01  |
| 1121.734 | 10.40147 | 1146.162 | 10.55779 | 1082.484 | 10.53338 | 1113.422 | 10.64419 | 1101.837 |
| 1121.282 | 10.40278 | 1146.055 | 10.56    | 1081.824 | 10.53647 | 1112.645 | 10.65    | 1100.174 |
| 1120.629 | 10.40396 | 1145.957 | 10.56107 | 1081.504 | 10.53956 | 1111.86  | 10.65419 | 1098.967 |
| 1120.021 | 10.40514 | 1145.858 | 10.56278 | 1080.997 | 10.54353 | 1110.847 | 10.66    | 1097.258 |

|          |          |          |          |          |          |          |          |          |
|----------|----------|----------|----------|----------|----------|----------|----------|----------|
| 1119.406 | 10.40632 | 1145.757 | 10.56438 | 1080.522 | 10.54676 | 1110.008 | 10.66419 | 1096.017 |
| 1119.026 | 10.40838 | 1145.58  | 10.56579 | 1080.108 | 10.54999 | 1109.16  | 10.67    | 1094.261 |
| 1118.316 | 10.41    | 1145.438 | 10.56719 | 1079.694 | 10.55369 | 1108.184 | 10.67419 | 1092.986 |
| 1117.654 | 10.41152 | 1145.303 | 10.56859 | 1079.282 | 10.55706 | 1107.28  | 10.68    | 1091.183 |
| 1116.985 | 10.41289 | 1145.179 | 10.57    | 1078.869 | 10.56    | 1106.483 | 10.68419 | 1089.874 |
| 1116.686 | 10.41426 | 1145.054 | 10.57177 | 1078.351 | 10.56385 | 1105.435 | 10.69    | 1088.025 |
| 1115.915 | 10.41562 | 1144.927 | 10.57326 | 1077.917 | 10.56736 | 1104.462 | 10.69419 | 1086.682 |
| 1115.197 | 10.41801 | 1144.702 | 10.57531 | 1077.321 | 10.57    | 1103.725 | 10.7     | 1084.786 |
| 1114.472 | 10.42    | 1144.511 | 10.57662 | 1076.944 | 10.57401 | 1102.599 | 10.70419 | 1083.41  |
| 1114.158 | 10.4217  | 1144.346 | 10.5789  | 1076.285 | 10.57768 | 1101.552 | 10.71    | 1081.467 |
| 1113.427 | 10.42321 | 1144.196 | 10.58    | 1075.968 | 10.58    | 1100.885 | 10.71419 | 1080.058 |
| 1112.65  | 10.42472 | 1144.044 | 10.58123 | 1075.615 | 10.58419 | 1099.674 | 10.72    | 1078.068 |
| 1111.865 | 10.42623 | 1143.89  | 10.58282 | 1075.161 | 10.59    | 1097.955 | 10.72419 | 1076.625 |
| 1110.852 | 10.42887 | 1143.617 | 10.5845  | 1074.681 | 10.59419 | 1096.71  | 10.73    | 1074.589 |
| 1110.013 | 10.43    | 1143.499 | 10.58682 | 1074.023 | 10.6     | 1094.943 | 10.73419 | 1073.113 |
| 1109.165 | 10.43185 | 1143.303 | 10.58829 | 1073.605 | 10.60419 | 1093.663 | 10.74    | 1071.031 |
| 1108.189 | 10.43349 | 1143.126 | 10.58976 | 1073.189 | 10.61    | 1091.849 | 10.74419 | 1069.52  |
| 1107.285 | 10.43496 | 1142.965 | 10.59103 | 1072.834 | 10.61419 | 1090.534 | 10.75    | 1067.392 |
| 1106.488 | 10.43644 | 1142.802 | 10.59275 | 1072.35  | 10.62    | 1088.671 | 10.75419 | 1065.848 |
| 1105.44  | 10.43791 | 1142.637 | 10.59439 | 1071.893 | 10.62419 | 1087.322 | 10.76    | 1063.673 |
| 1104.468 | 10.44    | 1142.402 | 10.59582 | 1071.494 | 10.63    | 1085.412 | 10.76419 | 1062.096 |
| 1103.73  | 10.44169 | 1142.21  | 10.59725 | 1071.096 | 10.63419 | 1084.028 | 10.77    | 1059.875 |
| 1102.604 | 10.44305 | 1142.051 | 10.59975 | 1070.402 | 10.64    | 1082.07  | 10.77419 | 1058.265 |
| 1101.557 | 10.44441 | 1141.892 | 10.60139 | 1069.948 | 10.64419 | 1080.651 | 10.77673 | 1057.279 |
| 1100.89  | 10.44578 | 1141.73  | 10.60321 | 1069.449 | 10.65    | 1078.646 | 10.77874 | 1056.501 |
| 1099.68  | 10.45    | 1141.222 | 10.60518 | 1068.909 | 10.65419 | 1077.193 | 10.78    | 1056.016 |
| 1099.19  | 10.45156 | 1141.032 | 10.6079  | 1068.169 | 10.66    | 1075.139 | 10.78197 | 1055.257 |
| 1098.765 | 10.45301 | 1140.852 | 10.609   | 1067.868 | 10.66314 | 1074.026 | 10.78331 | 1054.742 |
| 1097.987 | 10.45445 | 1140.67  | 10.61007 | 1067.578 | 10.66547 | 1073.198 | 10.78464 | 1054.229 |
| 1097.573 | 10.4559  | 1140.487 | 10.61138 | 1067.226 | 10.66747 | 1072.492 | 10.78598 | 1053.716 |
| 1097.181 | 10.46    | 1139.959 | 10.61295 | 1066.803 | 10.66946 | 1071.787 | 10.79    | 1052.179 |
| 1096.791 | 10.46165 | 1139.743 | 10.6157  | 1066.065 | 10.67073 | 1071.34  | 10.79153 | 1051.597 |
| 1096.401 | 10.4632  | 1139.537 | 10.61845 | 1065.331 | 10.6729  | 1070.58  | 10.79287 | 1051.088 |
| 1095.107 | 10.46474 | 1139.33  | 10.62    | 1064.919 | 10.67427 | 1070.098 | 10.79392 | 1050.689 |
| 1094.665 | 10.46629 | 1139.121 | 10.62138 | 1064.554 | 10.67565 | 1069.617 | 10.79497 | 1050.29  |
| 1094.28  | 10.47    | 1138.611 | 10.62311 | 1064.098 | 10.67806 | 1068.776 | 10.79603 | 1049.891 |
| 1093.964 | 10.47177 | 1138.365 | 10.62483 | 1063.647 | 10.68    | 1068.1   | 10.79953 | 1048.568 |
| 1093.649 | 10.47341 | 1138.132 | 10.62719 | 1063.03  | 10.6814  | 1067.616 | 10.80091 | 1048.048 |
| 1093.334 | 10.47506 | 1137.897 | 10.62869 | 1062.638 | 10.68257 | 1067.21  | 10.80236 | 1047.505 |
| 1092.289 | 10.47671 | 1137.66  | 10.63    | 1062.298 | 10.68358 | 1066.86  | 10.80434 | 1046.761 |
| 1092.002 | 10.48    | 1137.18  | 10.63177 | 1061.839 | 10.6846  | 1066.51  | 10.80656 | 1045.935 |
| 1091.572 | 10.48188 | 1136.902 | 10.63325 | 1061.458 | 10.68561 | 1066.16  | 10.80855 | 1045.193 |
| 1090.983 | 10.48363 | 1136.639 | 10.63528 | 1060.936 | 10.68739 | 1065.549 | 10.81    | 1044.653 |
| 1090.329 | 10.48539 | 1136.374 | 10.63658 | 1060.605 | 10.68916 | 1064.94  | 10.81117 | 1044.217 |
| 1089.742 | 10.48714 | 1136.106 | 10.63787 | 1060.274 | 10.69025 | 1064.566 | 10.81304 | 1043.525 |
| 1089.404 | 10.49    | 1135.664 | 10.64    | 1059.734 | 10.69207 | 1063.945 | 10.81479 | 1042.879 |
| 1088.852 | 10.492   | 1135.352 | 10.64161 | 1059.326 | 10.6938  | 1063.357 | 10.81633 | 1042.314 |

|          |          |          |          |          |          |          |          |          |
|----------|----------|----------|----------|----------|----------|----------|----------|----------|
| 1088.339 | 10.49386 | 1135.057 | 10.64296 | 1058.986 | 10.69617 | 1062.552 | 10.81786 | 1041.75  |
| 1087.637 | 10.49572 | 1134.76  | 10.64482 | 1058.519 | 10.69768 | 1062.04  | 10.81939 | 1041.187 |
| 1087.192 | 10.49758 | 1134.459 | 10.646   | 1058.223 | 10.69919 | 1061.53  | 10.82051 | 1040.777 |
| 1086.748 | 10.5     | 1134.065 | 10.64719 | 1057.927 | 10.70022 | 1061.184 | 10.82192 | 1040.262 |
| 1086.452 | 10.50213 | 1133.716 | 10.64925 | 1057.412 | 10.70187 | 1060.626 | 10.82353 | 1039.674 |
| 1085.963 | 10.50409 | 1133.387 | 10.6503  | 1057.154 | 10.70345 | 1060.098 | 10.82575 | 1038.867 |
| 1085.502 | 10.50606 | 1133.055 | 10.6516  | 1056.831 | 10.70561 | 1059.375 | 10.82716 | 1038.354 |
| 1085.099 | 10.50803 | 1132.72  | 10.65323 | 1056.431 | 10.70698 | 1058.915 | 10.82857 | 1037.843 |
| 1084.696 | 10.51    | 1132.383 | 10.65469 | 1056.072 | 10.70836 | 1058.457 | 10.83    | 1037.325 |
| 1084.295 | 10.51225 | 1131.995 | 10.65598 | 1055.759 | 10.71    | 1057.912 | 10.83188 | 1036.646 |
| 1083.997 | 10.51433 | 1131.629 | 10.65726 | 1055.446 | 10.71181 | 1057.312 | 10.83348 | 1036.071 |
| 1083.524 | 10.51642 | 1131.26  | 10.65854 | 1055.135 | 10.71334 | 1056.807 | 10.83567 | 1035.284 |
| 1083.077 | 10.5185  | 1130.888 | 10.66    | 1054.781 | 10.71544 | 1056.114 | 10.8373  | 1034.7   |
| 1082.465 | 10.52    | 1130.618 | 10.66168 | 1054.377 | 10.71678 | 1055.674 | 10.84    | 1033.738 |
| 1082.076 | 10.52238 | 1130.187 | 10.66309 | 1054.037 | 10.71912 | 1054.906 | 10.84155 | 1033.185 |
| 1081.409 | 10.52458 | 1129.783 | 10.66504 | 1053.571 | 10.72033 | 1054.51  | 10.84297 | 1032.682 |
| 1081.128 | 10.52678 | 1129.374 | 10.66628 | 1053.276 | 10.72188 | 1054.006 | 10.84546 | 1031.802 |
| 1080.627 | 10.52897 | 1128.962 | 10.66845 | 1052.761 | 10.72294 | 1053.663 | 10.84794 | 1030.925 |
| 1079.939 | 10.53    | 1128.769 | 10.67    | 1052.394 | 10.72471 | 1053.087 | 10.85    | 1030.201 |
| 1079.504 | 10.53251 | 1128.293 | 10.67121 | 1052.111 | 10.72715 | 1052.298 | 10.85133 | 1029.735 |
| 1079.069 | 10.53483 | 1127.848 | 10.67278 | 1051.743 | 10.7287  | 1051.797 | 10.85303 | 1029.14  |
| 1078.75  | 10.53715 | 1127.398 | 10.67448 | 1051.344 | 10.73    | 1051.38  | 10.85481 | 1028.518 |
| 1078.238 | 10.53946 | 1126.943 | 10.67683 | 1050.8   | 10.7316  | 1050.867 | 10.85726 | 1027.665 |
| 1077.755 | 10.54265 | 1126.314 | 10.67833 | 1050.454 | 10.73307 | 1050.396 | 10.85882 | 1027.124 |
| 1077.093 | 10.54508 | 1125.825 | 10.67982 | 1050.111 | 10.73461 | 1049.906 | 10.86    | 1026.715 |
| 1076.673 | 10.54752 | 1125.33  | 10.68105 | 1049.828 | 10.73595 | 1049.478 | 10.86103 | 1026.358 |
| 1076.263 | 10.54996 | 1124.831 | 10.68282 | 1049.424 | 10.73729 | 1049.051 | 10.86275 | 1025.766 |
| 1075.955 | 10.55279 | 1124.249 | 10.6845  | 1049.043 | 10.73964 | 1048.306 | 10.86437 | 1025.207 |
| 1075.679 | 10.55535 | 1123.713 | 10.68597 | 1048.71  | 10.74069 | 1047.976 | 10.8658  | 1024.719 |
| 1075.404 | 10.55791 | 1123.172 | 10.68744 | 1048.379 | 10.74192 | 1047.587 | 10.86722 | 1024.231 |
| 1075.129 | 10.56    | 1122.726 | 10.69    | 1047.806 | 10.743   | 1047.248 | 10.86864 | 1023.745 |
| 1074.65  | 10.56293 | 1122.099 | 10.6911  | 1047.561 | 10.74481 | 1046.679 | 10.87    | 1023.281 |
| 1074.172 | 10.56561 | 1121.514 | 10.69307 | 1047.123 | 10.74731 | 1045.899 | 10.87184 | 1022.655 |
| 1073.762 | 10.5683  | 1120.923 | 10.69579 | 1046.525 | 10.7489  | 1045.404 | 10.87339 | 1022.129 |
| 1073.385 | 10.57    | 1120.548 | 10.69752 | 1046.146 | 10.75    | 1045.06  | 10.87553 | 1021.406 |
| 1073.034 | 10.57307 | 1119.865 | 10.7     | 1045.605 | 10.75103 | 1044.741 | 10.87688 | 1020.948 |
| 1072.727 | 10.57589 | 1119.228 | 10.70124 | 1045.336 | 10.75273 | 1044.215 | 10.87926 | 1020.148 |
| 1072.461 | 10.57871 | 1118.584 | 10.70235 | 1045.096 | 10.75434 | 1043.718 | 10.88034 | 1019.786 |
| 1072.195 | 10.58    | 1118.287 | 10.70346 | 1044.858 | 10.75575 | 1043.285 | 10.88186 | 1019.277 |
| 1071.929 | 10.58322 | 1117.545 | 10.70458 | 1044.62  | 10.75715 | 1042.852 | 10.88289 | 1018.931 |
| 1071.31  | 10.58617 | 1116.853 | 10.70652 | 1044.205 | 10.75856 | 1042.42  | 10.8846  | 1018.361 |
| 1071.009 | 10.58912 | 1116.154 | 10.70846 | 1043.793 | 10.76    | 1041.981 | 10.88695 | 1017.579 |
| 1070.746 | 10.59042 | 1115.845 | 10.71    | 1043.468 | 10.76177 | 1041.443 | 10.88845 | 1017.083 |
| 1070.287 | 10.59337 | 1115.14  | 10.71138 | 1043.179 | 10.76325 | 1040.992 | 10.88995 | 1016.588 |
| 1069.298 | 10.59646 | 1114.391 | 10.7126  | 1042.923 | 10.76529 | 1040.374 | 10.89103 | 1016.232 |
| 1068.907 | 10.59954 | 1113.634 | 10.71383 | 1042.668 | 10.76659 | 1039.981 | 10.89275 | 1015.665 |
| 1068.553 | 10.60353 | 1112.65  | 10.71499 | 1042.427 | 10.76789 | 1039.59  | 10.89438 | 1015.13  |



|          |          |          |          |          |          |          |          |          |
|----------|----------|----------|----------|----------|----------|----------|----------|----------|
| 1068.124 | 10.60675 | 1111.84  | 10.71665 | 1042.083 | 10.77    | 1038.957 | 10.89581 | 1014.663 |
| 1067.717 | 10.60997 | 1111.021 | 10.71771 | 1041.865 | 10.7717  | 1038.448 | 10.89724 | 1014.196 |
| 1067.16  | 10.61368 | 1110.074 | 10.71877 | 1041.649 | 10.77314 | 1038.02  | 10.89973 | 1013.382 |
| 1066.806 | 10.61705 | 1109.2   | 10.72    | 1041.397 | 10.77511 | 1037.432 | 10.90137 | 1012.851 |
| 1066.554 | 10.62    | 1108.427 | 10.72121 | 1041.151 | 10.77637 | 1037.06  | 10.90314 | 1012.278 |
| 1066.128 | 10.62385 | 1107.414 | 10.72225 | 1040.94  | 10.77857 | 1036.41  | 10.90504 | 1011.664 |
| 1065.774 | 10.62736 | 1106.472 | 10.72329 | 1040.73  | 10.78    | 1035.987 | 10.90766 | 1010.823 |
| 1065.289 | 10.63    | 1105.759 | 10.72433 | 1040.521 | 10.78119 | 1035.637 | 10.90933 | 1010.289 |
| 1064.981 | 10.63401 | 1104.669 | 10.72796 | 1039.794 | 10.78273 | 1035.186 | 10.91057 | 1009.891 |
| 1064.674 | 10.63768 | 1103.654 | 10.73    | 1039.39  | 10.78437 | 1034.707 | 10.91219 | 1009.377 |
| 1064.25  | 10.64    | 1103.01  | 10.73108 | 1039.178 | 10.78663 | 1034.051 | 10.91404 | 1008.79  |
| 1063.859 | 10.64419 | 1101.836 | 10.73302 | 1038.798 | 10.78806 | 1033.634 | 10.91658 | 1007.985 |
| 1063.531 | 10.65    | 1100.174 | 10.73472 | 1038.467 | 10.7895  | 1033.219 | 10.9182  | 1007.474 |
| 1063.082 | 10.65419 | 1098.967 | 10.73619 | 1038.184 | 10.791   | 1032.787 | 10.92    | 1006.907 |
| 1062.797 | 10.66    | 1097.257 | 10.73765 | 1037.901 | 10.79267 | 1032.305 | 10.92119 | 1006.533 |
| 1062.3   | 10.66419 | 1096.016 | 10.73912 | 1037.621 | 10.79426 | 1031.851 | 10.92226 | 1006.198 |
| 1061.996 | 10.67    | 1094.26  | 10.74021 | 1037.413 | 10.79565 | 1031.454 | 10.92333 | 1005.864 |
| 1061.731 | 10.67419 | 1092.985 | 10.74168 | 1037.134 | 10.79704 | 1031.058 | 10.92441 | 1005.53  |
| 1061.39  | 10.68    | 1091.182 | 10.74314 | 1036.857 | 10.79947 | 1030.368 | 10.92628 | 1004.947 |
| 1061.03  | 10.68419 | 1089.873 | 10.74446 | 1036.609 | 10.80071 | 1030.016 | 10.92815 | 1004.366 |
| 1060.537 | 10.69    | 1088.024 | 10.74578 | 1036.363 | 10.80199 | 1029.656 | 10.93    | 1003.795 |
| 1060.225 | 10.69419 | 1086.682 | 10.7471  | 1036.117 | 10.8031  | 1029.342 | 10.93133 | 1003.384 |
| 1059.913 | 10.7     | 1084.785 | 10.75    | 1035.581 | 10.80501 | 1028.808 | 10.93252 | 1003.019 |
| 1059.688 | 10.70128 | 1084.368 | 10.75151 | 1035.305 | 10.80763 | 1028.077 | 10.93371 | 1002.655 |
| 1059.389 | 10.70265 | 1083.919 | 10.75281 | 1035.068 | 10.8093  | 1027.613 | 10.9349  | 1002.292 |
| 1059.047 | 10.70465 | 1083.267 | 10.75411 | 1034.832 | 10.81058 | 1027.259 | 10.93697 | 1001.658 |
| 1058.58  | 10.70664 | 1082.618 | 10.75541 | 1034.597 | 10.8122  | 1026.81  | 10.93905 | 1001.026 |
| 1058.284 | 10.70864 | 1081.97  | 10.75997 | 1033.785 | 10.81407 | 1026.297 | 10.9403  | 1000.649 |
| 1057.768 | 10.71    | 1081.529 | 10.76134 | 1033.542 | 10.81663 | 1025.595 | 10.94146 | 1000.297 |
| 1057.493 | 10.71228 | 1080.792 | 10.76255 | 1033.331 | 10.81826 | 1025.15  | 10.94276 | 999.906  |
| 1057.224 | 10.71352 | 1080.393 | 10.76376 | 1033.12  | 10.82    | 1024.677 | 10.94392 | 999.5551 |
| 1056.989 | 10.71476 | 1079.995 | 10.76588 | 1032.754 | 10.82121 | 1024.35  | 10.94509 | 999.205  |
| 1056.589 | 10.71599 | 1079.598 | 10.76769 | 1032.443 | 10.8223  | 1024.056 | 10.94626 | 998.8556 |
| 1056.041 | 10.72    | 1078.316 | 10.76951 | 1032.134 | 10.82338 | 1023.763 | 10.9483  | 998.2457 |
| 1055.695 | 10.72141 | 1077.864 | 10.77208 | 1031.699 | 10.82447 | 1023.471 | 10.95    | 997.7386 |
| 1055.426 | 10.72265 | 1077.471 | 10.77389 | 1031.395 | 10.82637 | 1022.961 | 10.95151 | 997.2911 |
| 1055.09  | 10.72371 | 1077.134 | 10.77553 | 1031.124 | 10.82828 | 1022.453 | 10.95286 | 996.8905 |
| 1054.707 | 10.72477 | 1076.798 | 10.77716 | 1030.855 | 10.83    | 1021.995 | 10.95422 | 996.491  |
| 1054.183 | 10.72583 | 1076.462 | 10.7788  | 1030.588 | 10.83136 | 1021.634 | 10.95557 | 996.0924 |
| 1053.851 | 10.72973 | 1075.233 | 10.78    | 1030.392 | 10.83257 | 1021.314 | 10.95794 | 995.397  |
| 1053.5   | 10.731   | 1074.832 | 10.78187 | 1030.089 | 10.83379 | 1020.995 | 10.96    | 994.7955 |
| 1053.256 | 10.73257 | 1074.341 | 10.78345 | 1029.836 | 10.835   | 1020.677 | 10.96168 | 994.3057 |
| 1053.037 | 10.73472 | 1073.668 | 10.78503 | 1029.585 | 10.83712 | 1020.121 | 10.96318 | 993.8717 |
| 1052.818 | 10.73711 | 1072.921 | 10.7866  | 1029.336 | 10.83924 | 1019.569 | 10.96468 | 993.4389 |
| 1052.6   | 10.73926 | 1072.251 | 10.79    | 1028.806 | 10.8403  | 1019.293 | 10.96618 | 993.0075 |
| 1052.22  | 10.74031 | 1071.927 | 10.7918  | 1028.527 | 10.8415  | 1018.985 | 10.9688  | 992.2548 |
| 1051.841 | 10.74236 | 1071.292 | 10.79347 | 1028.273 | 10.84282 | 1018.642 | 10.97    | 991.9103 |

|          |          |          |          |          |          |          |          |          |
|----------|----------|----------|----------|----------|----------|----------|----------|----------|
| 1051.508 | 10.74428 | 1070.701 | 10.79513 | 1028.022 | 10.84402 | 1018.335 | 10.97183 | 991.3876 |
| 1051.24  | 10.74692 | 1069.889 | 10.79679 | 1027.772 | 10.84522 | 1018.029 | 10.97346 | 990.9265 |
| 1051.001 | 10.74859 | 1069.374 | 10.8     | 1027.295 | 10.84641 | 1017.723 | 10.97492 | 990.5127 |
| 1050.764 | 10.75    | 1068.945 | 10.8019  | 1027.016 | 10.8485  | 1017.19  | 10.97638 | 990.1002 |
| 1050.527 | 10.75113 | 1068.6   | 10.80366 | 1026.762 | 10.85    | 1016.81  | 10.97784 | 989.6889 |
| 1050.114 | 10.753   | 1068.029 | 10.80541 | 1026.51  | 10.85155 | 1016.419 | 10.98    | 989.0839 |
| 1049.703 | 10.75478 | 1067.489 | 10.80717 | 1026.26  | 10.85294 | 1016.069 | 10.98167 | 988.6167 |
| 1049.429 | 10.75634 | 1067.018 | 10.81    | 1025.862 | 10.85433 | 1015.72  | 10.98302 | 988.242  |
| 1049.028 | 10.75789 | 1066.547 | 10.81201 | 1025.583 | 10.85572 | 1015.373 | 10.98436 | 987.8683 |
| 1048.775 | 10.76    | 1065.912 | 10.81386 | 1025.329 | 10.85816 | 1014.767 | 10.98571 | 987.4956 |
| 1048.522 | 10.7611  | 1065.58  | 10.81571 | 1025.079 | 10.86    | 1014.31  | 10.99    | 986.3152 |
| 1048.082 | 10.76306 | 1064.992 | 10.81757 | 1024.831 | 10.86173 | 1013.883 | 10.99154 | 985.8938 |
| 1047.688 | 10.76576 | 1064.186 | 10.82    | 1024.508 | 10.86327 | 1013.506 | 10.99296 | 985.506  |
| 1047.383 | 10.76747 | 1063.675 | 10.82212 | 1024.23  | 10.86481 | 1013.13  | 10.99439 | 985.1195 |
| 1047.115 | 10.76919 | 1063.165 | 10.82407 | 1023.98  | 10.86635 | 1012.756 | 10.99581 | 984.7341 |
| 1046.873 | 10.77025 | 1062.852 | 10.82602 | 1023.732 | 10.86904 | 1012.103 | 11       | 983.6064 |
| 1046.633 | 10.77224 | 1062.263 | 10.82797 | 1023.488 | 10.87038 | 1011.779 | 11.00163 | 983.1707 |
| 1046.394 | 10.77412 | 1061.707 | 10.83    | 1023.235 | 10.87188 | 1011.419 | 11.00314 | 982.7675 |
| 1045.978 | 10.77672 | 1060.944 | 10.83223 | 1022.961 | 10.87355 | 1011.02  | 11.00466 | 982.3657 |
| 1045.713 | 10.77837 | 1060.46  | 10.83428 | 1022.715 | 10.87506 | 1010.663 | 11.00617 | 981.9653 |
| 1045.285 | 10.78    | 1059.984 | 10.83632 | 1022.473 | 10.87656 | 1010.307 | 11.01    | 980.9583 |
| 1045.014 | 10.78121 | 1059.632 | 10.83837 | 1022.234 | 10.87806 | 1009.953 | 11.01173 | 980.5055 |
| 1044.745 | 10.78229 | 1059.318 | 10.84    | 1022.045 | 10.88    | 1009.497 | 11.01334 | 980.0875 |
| 1044.276 | 10.78337 | 1059.004 | 10.84234 | 1021.777 | 10.88172 | 1009.095 | 11.01495 | 979.671  |
| 1044.092 | 10.78445 | 1058.69  | 10.84449 | 1021.538 | 10.8831  | 1008.773 | 11.01656 | 979.2562 |
| 1043.763 | 10.78554 | 1058.375 | 10.84663 | 1021.303 | 10.88448 | 1008.453 | 11.02    | 978.3719 |
| 1043.472 | 10.78678 | 1058.015 | 10.84878 | 1021.072 | 10.88587 | 1008.133 | 11.02184 | 977.9027 |
| 1043.184 | 10.78787 | 1057.702 | 10.85    | 1020.941 | 10.89    | 1007.185 | 11.02354 | 977.4707 |
| 1042.897 | 10.78983 | 1057.138 | 10.85245 | 1020.682 | 10.89158 | 1006.825 | 11.02524 | 977.0405 |
| 1042.397 | 10.79112 | 1056.768 | 10.8547  | 1020.451 | 10.89304 | 1006.495 | 11.02695 | 976.6122 |
| 1042.208 | 10.79287 | 1056.267 | 10.85695 | 1020.225 | 10.8945  | 1006.166 | 11.03    | 975.8482 |
| 1042.034 | 10.79682 | 1055.142 | 10.85919 | 1020.004 | 10.89596 | 1005.838 | 11.03195 | 975.3635 |
| 1041.73  | 10.79989 | 1054.272 | 10.86032 | 1019.894 | 10.9     | 1004.939 | 11.03375 | 974.9185 |
| 1041.458 | 10.80156 | 1053.802 | 10.86257 | 1019.676 | 10.90167 | 1004.569 | 11.03555 | 974.4757 |
| 1041.188 | 10.80352 | 1053.25  | 10.86492 | 1019.457 | 10.90322 | 1004.229 | 11.03735 | 974.0349 |
| 1040.92  | 10.80549 | 1052.699 | 10.86726 | 1019.243 | 10.90477 | 1003.89  | 11.04    | 973.3881 |
| 1040.725 | 10.80819 | 1051.943 | 10.86961 | 1019.034 | 10.90633 | 1003.552 | 11.04206 | 972.889  |
| 1040.421 | 10.80992 | 1051.464 | 10.87268 | 1018.764 | 10.91    | 1002.759 | 11.04396 | 972.4322 |
| 1040.178 | 10.81111 | 1051.132 | 10.87513 | 1018.559 | 10.91177 | 1002.378 | 11.04586 | 971.9777 |
| 1039.937 | 10.81294 | 1050.626 | 10.87758 | 1018.359 | 10.91342 | 1002.028 | 11.04775 | 971.5255 |
| 1039.698 | 10.81468 | 1050.147 | 10.88    | 1018.167 | 10.91507 | 1001.68  | 11.05    | 970.9928 |
| 1039.129 | 10.8162  | 1049.729 | 10.8828  | 1017.949 | 10.91671 | 1001.334 | 11.05217 | 970.4806 |
| 1038.859 | 10.81771 | 1049.312 | 10.88535 | 1017.76  | 10.92    | 1000.646 | 11.05417 | 970.0129 |
| 1038.613 | 10.81923 | 1048.897 | 10.8879  | 1017.577 | 10.92188 | 1000.256 | 11.05617 | 969.548  |
| 1038.368 | 10.82051 | 1048.548 | 10.89    | 1017.431 | 10.92362 | 999.8977 | 11.05817 | 969.0856 |
| 1038.125 | 10.82191 | 1048.166 | 10.89292 | 1017.232 | 10.92536 | 999.5418 | 11.06    | 968.6634 |
| 1037.592 | 10.82352 | 1047.73  | 10.89557 | 1017.062 | 10.9271  | 999.188  | 11.06228 | 968.1393 |

|          |          |          |          |          |          |          |          |          |
|----------|----------|----------|----------|----------|----------|----------|----------|----------|
| 1037.319 | 10.82572 | 1047.132 | 10.89822 | 1016.9   | 10.93    | 998.6027 | 11.06439 | 967.6621 |
| 1037.069 | 10.82713 | 1046.753 | 10.9     | 1016.794 | 10.93199 | 998.2035 | 11.06649 | 967.188  |
| 1036.82  | 10.82853 | 1046.374 | 10.90303 | 1016.618 | 10.93383 | 997.8387 | 11.06859 | 966.7168 |
| 1036.572 | 10.83    | 1045.98  | 10.90579 | 1016.47  | 10.93566 | 997.4763 | 11.07    | 966.4012 |
| 1036.117 | 10.83185 | 1045.485 | 10.90854 | 1016.331 | 10.9375  | 997.1163 | 11.0724  | 965.8666 |
| 1035.839 | 10.83341 | 1045.068 | 10.91    | 1016.259 | 10.94    | 996.6295 | 11.07461 | 965.3812 |
| 1035.585 | 10.83556 | 1044.495 | 10.91315 | 1016.109 | 10.9421  | 996.2231 | 11.07681 | 964.8992 |
| 1035.333 | 10.83693 | 1044.132 | 10.91601 | 1015.987 | 10.94403 | 995.853  | 11.07902 | 964.4205 |
| 1035.083 | 10.83933 | 1043.499 | 10.91886 | 1015.874 | 10.94597 | 995.4855 | 11.08031 | 964.1393 |
| 1034.705 | 10.84034 | 1043.231 | 10.92    | 1015.831 | 10.94791 | 995.1208 | 11.08252 | 963.6639 |
| 1034.423 | 10.84192 | 1042.817 | 10.92326 | 1015.711 | 10.95    | 994.7281 | 11.08483 | 963.1717 |
| 1034.167 | 10.84299 | 1042.537 | 10.92622 | 1015.618 | 10.95221 | 994.3161 | 11.08714 | 962.6832 |
| 1033.913 | 10.84479 | 1042.066 | 10.92918 | 1015.535 | 10.95425 | 993.9421 | 11.08945 | 962.1986 |
| 1033.661 | 10.84726 | 1041.422 | 10.93042 | 1015.501 | 10.95628 | 993.5711 | 11.09264 | 961.5326 |
| 1033.356 | 10.84884 | 1041.013 | 10.93338 | 1015.426 | 10.95832 | 993.2032 | 11.09506 | 961.0351 |
| 1033.072 | 10.85    | 1040.712 | 10.93643 | 1015.366 | 10.96    | 992.9    | 11.09747 | 960.5419 |
| 1032.815 | 10.85109 | 1040.429 | 10.93949 | 1015.317 | 10.96233 | 992.4841 | 11.09989 | 960.0529 |
| 1032.56  | 10.85293 | 1039.956 | 10.94349 | 1015.26  | 10.96446 | 992.1078 | 11.10276 | 959.4744 |
| 1032.308 | 10.85467 | 1039.51  | 10.94664 | 1015.236 | 10.9666  | 991.735  | 11.10529 | 958.9734 |
| 1032.072 | 10.85619 | 1039.12  | 10.94978 | 1015.224 | 10.96873 | 991.3656 | 11.10781 | 958.477  |
| 1031.788 | 10.85771 | 1038.732 | 10.9536  | 1015.218 | 10.97    | 991.147  | 11.11    | 958.0505 |
| 1031.531 | 10.86    | 1038.15  | 10.95683 | 1015.234 | 10.97244 | 990.729  | 11.11289 | 957.4905 |
| 1031.278 | 10.86112 | 1037.867 | 10.96    | 1015.262 | 10.97468 | 990.3521 | 11.11552 | 956.9877 |
| 1031.027 | 10.86212 | 1037.613 | 10.9637  | 1015.303 | 10.97691 | 989.9791 | 11.11816 | 956.4901 |
| 1030.854 | 10.86313 | 1037.359 | 10.96702 | 1015.362 | 10.97915 | 989.61   | 11.12    | 956.1443 |
| 1030.571 | 10.86413 | 1037.106 | 10.97    | 1015.428 | 10.98032 | 989.4183 | 11.12301 | 955.5827 |
| 1030.317 | 10.86589 | 1036.665 | 10.97379 | 1015.519 | 10.98256 | 989.0527 | 11.12576 | 955.0801 |
| 1030.066 | 10.86765 | 1036.224 | 10.97718 | 1015.626 | 10.9849  | 988.677  | 11.1285  | 954.5832 |
| 1029.818 | 10.86941 | 1035.786 | 10.98    | 1015.726 | 10.98724 | 988.3058 | 11.13    | 954.3138 |
| 1029.704 | 10.87062 | 1035.486 | 10.98388 | 1015.872 | 10.98958 | 987.9389 | 11.13314 | 953.7529 |
| 1029.425 | 10.87237 | 1035.052 | 10.98733 | 1016.03  | 10.99268 | 987.4571 | 11.13599 | 953.2526 |
| 1029.174 | 10.87348 | 1034.776 | 10.99    | 1016.162 | 10.99512 | 987.0847 | 11.13885 | 952.7587 |
| 1028.927 | 10.87459 | 1034.501 | 10.99395 | 1016.367 | 10.99757 | 986.7172 | 11.14    | 952.5611 |
| 1028.684 | 10.87655 | 1034.022 | 10.99746 | 1016.578 | 11       | 986.3562 | 11.14326 | 952.0032 |
| 1028.349 | 10.8785  | 1033.544 | 11       | 1016.741 | 11.00279 | 985.9444 | 11.14623 | 951.5075 |
| 1028.105 | 10.88    | 1033.177 | 11.00401 | 1017.008 | 11.00535 | 985.5774 | 11.1492  | 951.019  |
| 1027.864 | 10.88137 | 1032.842 | 11.00756 | 1017.276 | 11.0079  | 985.2158 | 11.15042 | 950.8189 |
| 1027.628 | 10.88259 | 1032.546 | 11.01    | 1017.469 | 11.01    | 984.9214 | 11.15339 | 950.336  |
| 1027.347 | 10.88369 | 1032.281 | 11.01406 | 1017.801 | 11.01292 | 984.5164 | 11.15647 | 949.8474 |
| 1027.11  | 10.88479 | 1032.016 | 11.01568 | 1017.944 | 11.01557 | 984.157  | 11.15955 | 949.3667 |
| 1026.878 | 10.88589 | 1031.751 | 11.01731 | 1018.09  | 11.01823 | 983.8037 | 11.16352 | 948.7537 |
| 1026.679 | 10.88781 | 1031.29  | 11.01841 | 1018.191 | 11.02    | 983.5711 | 11.16671 | 948.2749 |
| 1026.42  | 10.88973 | 1030.83  | 11.0198  | 1018.32  | 11.02304 | 983.1754 | 11.16991 | 947.8048 |
| 1026.193 | 10.89142 | 1030.426 | 11.02096 | 1018.429 | 11.0258  | 982.8261 | 11.17365 | 947.2588 |
| 1025.97  | 10.8927  | 1030.122 | 11.02233 | 1018.56  | 11.02857 | 982.4837 | 11.17695 | 946.7927 |
| 1025.817 | 10.89398 | 1029.819 | 11.02351 | 1018.674 | 11.03    | 982.3078 | 11.18    | 946.3706 |
| 1025.57  | 10.89526 | 1029.517 | 11.02459 | 1018.78  | 11.03316 | 981.9242 | 11.18377 | 945.8533 |

|          |          |          |          |          |          |          |          |          |
|----------|----------|----------|----------|----------|----------|----------|----------|----------|
| 1025.354 | 10.8975  | 1028.99  | 11.02638 | 1018.959 | 11.03603 | 981.5877 | 11.18719 | 945.403  |
| 1025.144 | 10.89974 | 1028.465 | 11.02907 | 1019.236 | 11.0389  | 981.2587 | 11.19    | 945.0387 |
| 1025.032 | 10.90078 | 1028.222 | 11.03026 | 1019.361 | 11.04    | 981.1342 | 11.1939  | 944.5397 |
| 1024.799 | 10.90302 | 1027.702 | 11.03137 | 1019.479 | 11.04328 | 980.7657 | 11.19742 | 944.1081 |
| 1024.597 | 10.90444 | 1027.374 | 11.03261 | 1019.614 | 11.04626 | 980.4448 | 11.2     | 943.7976 |
| 1024.402 | 10.90586 | 1027.046 | 11.03372 | 1019.736 | 11.04924 | 980.1322 | 11.20402 | 943.3204 |
| 1024.325 | 10.90835 | 1026.474 | 11.03484 | 1019.859 | 11.05043 | 980.0088 | 11.20765 | 942.9105 |
| 1024.109 | 10.91    | 1026.096 | 11.03584 | 1019.972 | 11.0534  | 979.7028 | 11.21    | 942.6503 |
| 1023.925 | 10.91175 | 1025.698 | 11.03764 | 1020.178 | 11.05649 | 979.4005 | 11.21415 | 942.1982 |
| 1023.747 | 10.9133  | 1025.346 | 11.04    | 1020.451 | 11.05957 | 979.1075 | 11.22    | 941.6076 |
| 1023.676 | 10.91469 | 1025.031 | 11.04103 | 1020.573 | 11.06353 | 978.7389 | 11.22415 | 941.1963 |
| 1023.504 | 10.91608 | 1024.717 | 11.04272 | 1020.776 | 11.06672 | 978.4584 | 11.23    | 940.6649 |
| 1023.339 | 10.91748 | 1024.404 | 11.04377 | 1020.904 | 11.06991 | 978.1882 | 11.23415 | 940.2958 |
| 1023.182 | 10.91992 | 1023.857 | 11.04482 | 1021.033 | 11.07365 | 977.8773 | 11.23657 | 940.092  |
| 1022.986 | 10.9218  | 1023.439 | 11.04587 | 1021.164 | 11.07694 | 977.6221 | 11.23775 | 939.9941 |
| 1022.843 | 10.92341 | 1023.082 | 11.04772 | 1021.396 | 11.08    | 977.3944 | 11.24    | 939.8135 |
| 1022.709 | 10.92502 | 1022.726 | 11.04956 | 1021.632 | 11.08376 | 977.1208 | 11.24108 | 939.727  |
| 1022.558 | 10.92664 | 1022.371 | 11.05192 | 1021.942 | 11.08715 | 976.8944 | 11.2448  | 939.4474 |
| 1022.441 | 10.92946 | 1021.753 | 11.05358 | 1022.164 | 11.09    | 976.7129 | 11.24851 | 939.1827 |
| 1022.341 | 10.93098 | 1021.421 | 11.05938 | 1022.984 | 11.09387 | 976.4728 | 11.24955 | 939.1095 |
| 1022.223 | 10.932   | 1021.201 | 11.06083 | 1023.192 | 11.09736 | 976.2787 | 11.25104 | 939.0063 |
| 1022.134 | 10.93377 | 1020.817 | 11.0623  | 1023.405 | 11.1     | 976.1394 | 11.25411 | 938.8062 |
| 1022.068 | 10.93555 | 1020.435 | 11.06346 | 1023.574 | 11.10398 | 975.9367 | 11.25718 | 938.6165 |
| 1021.983 | 10.93733 | 1020.055 | 11.06524 | 1023.837 | 11.10756 | 975.7786 | 11.26    | 938.4515 |
| 1021.925 | 10.94    | 1019.485 | 11.06637 | 1024.004 | 11.11    | 975.6776 | 11.26351 | 938.2516 |
| 1021.89  | 10.94203 | 1019.054 | 11.06737 | 1024.156 | 11.11409 | 975.5165 | 11.26748 | 938.0529 |
| 1021.841 | 10.94381 | 1018.68  | 11.0686  | 1024.34  | 11.11775 | 975.3981 | 11.27    | 937.934  |
| 1021.819 | 10.9454  | 1018.344 | 11.07    | 1024.553 | 11.12    | 975.3314 | 11.27454 | 937.7301 |
| 1021.81  | 10.947   | 1018.01  | 11.07122 | 1024.739 | 11.12419 | 975.2162 | 11.27638 | 937.655  |
| 1021.802 | 10.9486  | 1017.678 | 11.0724  | 1024.92  | 11.13    | 975.1147 | 11.27794 | 937.595  |
| 1021.818 | 10.95    | 1017.388 | 11.07413 | 1025.189 | 11.13419 | 975.0507 | 11.27912 | 937.5508 |
| 1021.832 | 10.95183 | 1017.01  | 11.07574 | 1025.44  | 11.14    | 975.0225 | 11.28037 | 937.5048 |
| 1021.868 | 10.9534  | 1016.687 | 11.07843 | 1025.864 | 11.14419 | 975.0116 | 11.28171 | 937.4573 |
| 1021.968 | 10.95497 | 1016.366 | 11.08    | 1026.114 | 11.15    | 975.0592 | 11.28288 | 937.4172 |
| 1022.05  | 10.95654 | 1016.046 | 11.0814  | 1026.339 | 11.15419 | 975.1032 | 11.28424 | 937.3717 |
| 1022.213 | 10.96    | 1015.345 | 11.0828  | 1026.564 | 11.15598 | 975.1303 | 11.28617 | 937.31   |
| 1022.343 | 10.9618  | 1014.983 | 11.08405 | 1026.768 | 11.15701 | 975.1479 | 11.28883 | 937.2294 |
| 1022.573 | 10.96346 | 1014.651 | 11.08515 | 1026.947 | 11.15862 | 975.1775 | 11.29    | 937.1949 |
| 1022.752 | 10.96512 | 1014.321 | 11.08624 | 1027.127 | 11.15972 | 975.1988 | 11.29131 | 937.157  |
| 1023.05  | 10.96678 | 1013.992 | 11.08734 | 1027.308 | 11.16095 | 975.224  | 11.29264 | 937.1192 |
| 1023.28  | 10.97    | 1013.357 | 11.08926 | 1027.626 | 11.16203 | 975.2474 | 11.29415 | 937.077  |
| 1023.6   | 10.9719  | 1012.986 | 11.09027 | 1027.796 | 11.16351 | 975.2818 | 11.29576 | 937.0332 |
| 1023.69  | 10.97366 | 1012.644 | 11.09157 | 1028.014 | 11.1652  | 975.3241 | 11.29695 | 937.0013 |
| 1023.839 | 10.97542 | 1012.304 | 11.09324 | 1028.297 | 11.16673 | 975.365  | 11.29838 | 936.9643 |
| 1023.92  | 10.97718 | 1011.966 | 11.09483 | 1028.568 | 11.16883 | 975.4249 | 11.29962 | 936.9332 |
| 1024.002 | 10.98    | 1011.426 | 11.09622 | 1028.807 | 11.17    | 975.4602 | 11.30089 | 936.9024 |
| 1024.085 | 10.98201 | 1011.044 | 11.09761 | 1029.046 | 11.17153 | 975.5079 | 11.30191 | 936.8781 |

|          |          |          |          |          |          |          |          |          |
|----------|----------|----------|----------|----------|----------|----------|----------|----------|
| 1024.161 | 10.98387 | 1010.693 | 11.1     | 1029.463 | 11.17313 | 975.5615 | 11.30358 | 936.8399 |
| 1024.301 | 10.98573 | 1010.345 | 11.10159 | 1029.742 | 11.17467 | 975.6154 | 11.30557 | 936.7962 |
| 1024.385 | 10.9876  | 1009.998 | 11.10434 | 1030.233 | 11.1764  | 975.6788 | 11.30756 | 936.7544 |
| 1024.476 | 10.99    | 1009.552 | 11.10709 | 1030.73  | 11.1776  | 975.7245 | 11.30866 | 936.732  |
| 1024.603 | 10.99213 | 1009.16  | 11.10957 | 1031.182 | 11.1791  | 975.7837 | 11.31    | 936.7053 |
| 1024.686 | 10.99409 | 1008.802 | 11.11258 | 1031.738 | 11.18021 | 975.8292 | 11.3114  | 936.6783 |
| 1024.832 | 10.99606 | 1008.446 | 11.11422 | 1032.042 | 11.18157 | 975.8871 | 11.31321 | 936.6443 |
| 1024.914 | 10.99802 | 1008.092 | 11.11585 | 1032.348 | 11.18266 | 975.935  | 11.31488 | 936.6143 |
| 1025.017 | 11       | 1007.737 | 11.11748 | 1032.656 | 11.18452 | 976.0197 | 11.3178  | 936.5643 |
| 1025.124 | 11.00225 | 1007.336 | 11.12    | 1033.135 | 11.18595 | 976.0868 | 11.32    | 936.5293 |
| 1025.259 | 11.00432 | 1006.971 | 11.12187 | 1033.492 | 11.18717 | 976.1456 | 11.3214  | 936.5084 |
| 1025.369 | 11.00638 | 1006.608 | 11.12383 | 1033.873 | 11.18858 | 976.2145 | 11.32265 | 936.4907 |
| 1025.493 | 11.00845 | 1006.248 | 11.12579 | 1034.257 | 11.18959 | 976.2648 | 11.32374 | 936.4757 |
| 1025.62  | 11.01    | 1005.981 | 11.13    | 1035.094 | 11.19062 | 976.3165 | 11.32484 | 936.4612 |
| 1025.846 | 11.01237 | 1005.573 | 11.13224 | 1035.542 | 11.19169 | 976.3711 | 11.32617 | 936.4443 |
| 1026.01  | 11.01454 | 1005.202 | 11.13861 | 1036.853 | 11.19276 | 976.4255 | 11.32749 | 936.4283 |
| 1026.166 | 11.01672 | 1004.834 | 11.14    | 1037.142 | 11.19403 | 976.4915 | 11.32882 | 936.4129 |
| 1026.305 | 11.0189  | 1004.469 | 11.14727 | 1038.667 | 11.19565 | 976.5766 | 11.33    | 936.3999 |
| 1026.432 | 11.02    | 1004.285 | 11.15    | 1039.255 | 11.19703 | 976.6505 | 11.33184 | 936.3809 |
| 1026.561 | 11.02249 | 1003.871 | 11.15315 | 1039.938 | 11.19901 | 976.7578 | 11.33423 | 936.3588 |
| 1026.792 | 11.02477 | 1003.496 | 11.15452 | 1040.127 | 11.20012 | 976.8188 | 11.33575 | 936.3462 |
| 1027.003 | 11.02706 | 1003.124 | 11.15636 | 1040.114 | 11.20139 | 976.8898 | 11.33727 | 936.3347 |
| 1027.113 | 11.02934 | 1002.756 | 11.15754 | 1040.086 | 11.20249 | 976.9513 | 11.33993 | 936.3165 |
| 1027.235 | 11.03261 | 1002.232 | 11.15959 | 1040.12  | 11.20441 | 977.0603 | 11.34277 | 936.302  |
| 1027.344 | 11.03501 | 1001.854 | 11.16235 | 1040.219 | 11.20614 | 977.1598 | 11.34517 | 936.2929 |
| 1027.533 | 11.0374  | 1001.48  | 11.16697 | 1040.402 | 11.20787 | 977.2608 | 11.34712 | 936.2872 |
| 1027.687 | 11.0398  | 1001.11  | 11.17    | 1040.506 | 11.21    | 977.3875 | 11.34887 | 936.2835 |
| 1027.817 | 11.04274 | 1000.658 | 11.17529 | 1040.689 | 11.21134 | 977.4684 | 11.35    | 936.2816 |
| 1027.932 | 11.04525 | 1000.278 | 11.18    | 1040.869 | 11.21272 | 977.5527 | 11.35183 | 936.28   |
| 1028.047 | 11.04776 | 999.9033 | 11.18529 | 1041.074 | 11.21399 | 977.6312 | 11.35341 | 936.2799 |
| 1028.158 | 11.05    | 999.571  | 11.19    | 1041.262 | 11.21541 | 977.7199 | 11.35893 | 936.2937 |
| 1028.32  | 11.05287 | 999.1487 | 11.19529 | 1041.476 | 11.21708 | 977.8255 | 11.36    | 936.2969 |
| 1028.525 | 11.05549 | 998.7697 | 11.2     | 1041.678 | 11.21867 | 977.9268 | 11.36576 | 936.3278 |
| 1028.662 | 11.05811 | 998.3953 | 11.20529 | 1041.907 | 11.22    | 978.013  | 11.37    | 936.3601 |
| 1028.779 | 11.06    | 998.1282 | 11.21    | 1042.12  | 11.22254 | 978.1801 | 11.37568 | 936.4096 |
| 1028.977 | 11.063   | 997.7065 | 11.21529 | 1042.362 | 11.22373 | 978.2596 | 11.38    | 936.4624 |
| 1029.146 | 11.06574 | 997.3296 | 11.22    | 1042.587 | 11.22606 | 978.4177 | 11.38568 | 936.5382 |
| 1029.309 | 11.06847 | 996.9577 | 11.22529 | 1042.842 | 11.22819 | 978.5641 | 11.39    | 936.6109 |
| 1029.431 | 11.07    | 996.7519 | 11.23    | 1043.079 | 11.23    | 978.6908 | 11.39568 | 936.7128 |
| 1029.705 | 11.07313 | 996.3329 | 11.23529 | 1043.347 | 11.23243 | 978.8616 | 11.4     | 936.8054 |
| 1029.899 | 11.07598 | 995.9598 | 11.24    | 1043.597 | 11.23455 | 979.0147 | 11.40568 | 936.9335 |
| 1030.095 | 11.07884 | 995.5924 | 11.24529 | 1043.879 | 11.23619 | 979.134  | 11.41    | 937.046  |
| 1030.408 | 11.08    | 995.4439 | 11.24873 | 1044.069 | 11.23783 | 979.2547 | 11.41568 | 937.2003 |
| 1030.618 | 11.08326 | 995.0297 | 11.24983 | 1044.129 | 11.23946 | 979.3767 | 11.42    | 937.3327 |
| 1030.791 | 11.08624 | 994.6625 | 11.25133 | 1044.213 | 11.24187 | 979.5576 | 11.42568 | 937.5131 |
| 1031.031 | 11.08921 | 994.3016 | 11.25537 | 1044.442 | 11.24347 | 979.6802 | 11.43    | 937.6654 |
| 1031.185 | 11.09042 | 994.1547 | 11.26    | 1044.71  | 11.24507 | 979.8041 | 11.43568 | 937.872  |

|          |          |          |          |          |          |          |          |          |
|----------|----------|----------|----------|----------|----------|----------|----------|----------|
| 1031.455 | 11.0934  | 993.7988 | 11.26462 | 1044.98  | 11.24874 | 980.0947 | 11.44    | 938.0442 |
| 1031.647 | 11.09649 | 993.4397 | 11.26854 | 1045.216 | 11.24979 | 980.178  | 11.44568 | 938.2769 |
| 1031.935 | 11.09958 | 993.0876 | 11.27    | 1045.304 | 11.25106 | 980.28   | 11.45    | 938.469  |
| 1032.185 | 11.10353 | 992.6424 | 11.27395 | 1045.546 | 11.25366 | 980.492  | 11.45568 | 938.7278 |
| 1032.407 | 11.10674 | 992.2938 | 11.28    | 1045.927 | 11.25757 | 980.8197 | 11.46    | 938.9398 |
| 1032.638 | 11.10995 | 991.9528 | 11.28388 | 1046.173 | 11.26    | 981.0256 | 11.46568 | 939.2248 |
| 1032.87  | 11.11367 | 991.5626 | 11.29    | 1046.575 | 11.26448 | 981.4099 | 11.47    | 939.4566 |
| 1033.209 | 11.117   | 991.227  | 11.29388 | 1046.831 | 11.27    | 981.9069 | 11.47568 | 939.7678 |
| 1033.445 | 11.12    | 990.9311 | 11.3     | 1047.248 | 11.27448 | 982.314  | 11.48    | 940.0195 |
| 1033.653 | 11.1238  | 990.5611 | 11.30388 | 1047.515 | 11.28    | 982.8392 | 11.48568 | 940.3568 |
| 1033.863 | 11.12725 | 990.2412 | 11.31    | 1047.948 | 11.28448 | 983.2693 | 11.49    | 940.6283 |
| 1034.073 | 11.13    | 989.9918 | 11.31388 | 1048.224 | 11.29    | 983.823  | 11.49568 | 940.9918 |
| 1034.287 | 11.13394 | 989.6399 | 11.32    | 1048.674 | 11.29448 | 984.2762 | 11.5     | 941.2832 |
| 1034.53  | 11.1375  | 989.3382 | 11.32388 | 1048.96  | 11.3     | 984.8586 | 11.50568 | 941.6728 |
| 1034.861 | 11.14    | 989.132  | 11.33    | 1049.426 | 11.30448 | 985.335  | 11.51    | 941.984  |
| 1035.011 | 11.14408 | 988.8012 | 11.33388 | 1049.723 | 11.31    | 985.9464 | 11.51568 | 942.3998 |
| 1035.177 | 11.14776 | 988.5206 | 11.34    | 1050.205 | 11.31448 | 986.4463 | 11.52    | 942.7309 |
| 1035.336 | 11.15    | 988.3544 | 11.34388 | 1050.512 | 11.32    | 987.0867 | 11.52568 | 943.1728 |
| 1035.585 | 11.15421 | 988.0479 | 11.35    | 1051.01  | 11.32448 | 987.6103 | 11.53    | 943.5237 |
| 1035.845 | 11.16    | 987.6679 | 11.35388 | 1051.328 | 11.33    | 988.28   | 11.53109 | 943.6131 |
| 1036.717 | 11.16421 | 987.3978 | 11.36    | 1051.842 | 11.33448 | 988.8274 | 11.53235 | 943.7163 |
| 1037.145 | 11.17    | 987.0691 | 11.36388 | 1052.17  | 11.34    | 989.5267 | 11.53947 | 944.3259 |
| 1038.163 | 11.17421 | 986.8366 | 11.37    | 1052.701 | 11.34448 | 990.0981 | 11.54102 | 944.4595 |
| 1038.646 | 11.18    | 986.5608 | 11.37388 | 1053.04  | 11.35    | 990.8272 | 11.54814 | 945.0831 |
| 1039.701 | 11.18421 | 986.3669 | 11.38    | 1053.588 | 11.35448 | 991.4227 | 11.55    | 945.2518 |
| 1040.001 | 11.19    | 986.1457 | 11.38388 | 1053.937 | 11.36    | 992.1819 | 11.55102 | 945.3443 |
| 1040.167 | 11.19421 | 985.9918 | 11.39    | 1054.501 | 11.36448 | 992.8018 | 11.55814 | 946.0006 |
| 1040.369 | 11.2     | 985.8268 | 11.39388 | 1054.861 | 11.37    | 993.5913 | 11.56    | 946.1778 |
| 1041.073 | 11.20421 | 985.7141 | 11.4     | 1055.442 | 11.37448 | 994.2358 | 11.56102 | 946.275  |
| 1041.82  | 11.21    | 985.6073 | 11.40388 | 1055.813 | 11.38    | 995.0558 | 11.56814 | 946.964  |
| 1042.642 | 11.21421 | 985.5371 | 11.41    | 1056.411 | 11.38448 | 995.7251 | 11.57    | 947.1498 |
| 1043.489 | 11.21657 | 985.5095 | 11.41388 | 1056.792 | 11.39    | 996.5758 | 11.57102 | 947.2517 |
| 1044.338 | 11.21844 | 985.4907 | 11.42    | 1057.407 | 11.39448 | 997.2701 | 11.57814 | 947.9735 |
| 1045.213 | 11.22    | 985.4781 | 11.42388 | 1057.799 | 11.4     | 998.152  | 11.58    | 948.1679 |
| 1046.09  | 11.22183 | 985.4647 | 11.43    | 1058.431 | 11.40448 | 998.8715 | 11.58102 | 948.2744 |
| 1046.993 | 11.22583 | 985.4569 | 11.43388 | 1058.834 | 11.41    | 999.7847 | 11.58814 | 949.0289 |
| 1047.898 | 11.22945 | 985.464  | 11.44    | 1059.483 | 11.41448 | 1000.53  | 11.59    | 949.2319 |
| 1048.829 | 11.23063 | 985.4672 | 11.44388 | 1059.897 | 11.42    | 1001.475 | 11.59102 | 949.3431 |
| 1049.763 | 11.23193 | 985.4724 | 11.45    | 1060.564 | 11.42448 | 1002.245 | 11.59814 | 950.1304 |
| 1050.722 | 11.2331  | 985.4782 | 11.45388 | 1060.988 | 11.43    | 1003.222 | 11.6     | 950.3419 |
| 1051.684 | 11.23432 | 985.4853 | 11.46    | 1061.672 | 11.43448 | 1004.018 | 11.60102 | 950.4578 |
| 1052.672 | 11.2363  | 985.499  | 11.46388 | 1062.108 | 11.44    | 1005.027 | 11.60814 | 951.2778 |
| 1053.663 | 11.23824 | 985.5156 | 11.47    | 1062.809 | 11.44448 | 1005.85  | 11.61    | 951.498  |
| 1054.68  | 11.24    | 985.5335 | 11.47388 | 1063.256 | 11.45    | 1006.892 | 11.61102 | 951.6185 |
| 1055.7   | 11.24137 | 985.5497 | 11.48    | 1063.975 | 11.45448 | 1007.741 | 11.61418 | 951.9955 |
| 1056.747 | 11.24266 | 985.5668 | 11.48388 | 1064.433 | 11.46    | 1008.815 | 11.61524 | 952.1235 |
| 1057.797 | 11.24379 | 985.5831 | 11.49    | 1065.169 | 11.46448 | 1009.691 | 11.61652 | 952.2771 |

|          |          |          |          |          |          |          |          |          |
|----------|----------|----------|----------|----------|----------|----------|----------|----------|
| 1058.488 | 11.24493 | 985.6005 | 11.49388 | 1065.638 | 11.47    | 1010.799 | 11.61773 | 952.4241 |
| 1058.793 | 11.24614 | 985.6203 | 11.5     | 1066.392 | 11.47448 | 1011.702 | 11.61962 | 952.6553 |
| 1058.953 | 11.24766 | 985.6471 | 11.50388 | 1066.872 | 11.48    | 1012.843 | 11.6212  | 952.8499 |
| 1059.068 | 11.24874 | 985.6672 | 11.51    | 1067.644 | 11.48448 | 1013.773 | 11.62856 | 953.7805 |
| 1059.434 | 11.24988 | 985.689  | 11.51388 | 1068.136 | 11.49    | 1014.948 | 11.63    | 953.9643 |
| 1059.777 | 11.25143 | 985.7207 | 11.52    | 1068.925 | 11.49448 | 1015.905 | 11.63105 | 954.0984 |
| 1060.192 | 11.25294 | 985.7539 | 11.52388 | 1069.428 | 11.5     | 1017.115 | 11.63841 | 955.0468 |
| 1060.954 | 11.2544  | 985.7874 | 11.53    | 1070.236 | 11.50448 | 1018.1   | 11.64    | 955.2568 |
| 1061.342 | 11.25567 | 985.8184 | 11.53102 | 1070.371 | 11.51    | 1019.344 | 11.64105 | 955.3958 |
| 1062.127 | 11.25747 | 985.8637 | 11.5354  | 1070.954 | 11.51448 | 1020.357 | 11.64841 | 956.3776 |
| 1062.526 | 11.25926 | 985.9108 | 11.54    | 1071.575 | 11.52    | 1021.636 | 11.65    | 956.5949 |
| 1063.326 | 11.2603  | 985.9387 | 11.5443  | 1072.157 | 11.52448 | 1022.678 | 11.65105 | 956.7386 |
| 1063.734 | 11.26159 | 985.9741 | 11.55    | 1072.942 | 11.53    | 1023.993 | 11.65841 | 957.754  |
| 1064.551 | 11.26285 | 986.009  | 11.5543  | 1073.536 | 11.53128 | 1024.297 | 11.66    | 957.9785 |
| 1064.967 | 11.26392 | 986.0391 | 11.56    | 1074.337 | 11.53362 | 1024.859 | 11.66105 | 958.127  |
| 1065.803 | 11.26522 | 986.0764 | 11.5643  | 1074.943 | 11.54    | 1026.42  | 11.66841 | 959.1758 |
| 1066.227 | 11.2667  | 986.1196 | 11.57    | 1075.76  | 11.54198 | 1026.904 | 11.67    | 959.4076 |
| 1067.08  | 11.268   | 986.1586 | 11.5743  | 1076.377 | 11.54385 | 1027.293 | 11.67105 | 959.5609 |
| 1067.513 | 11.26912 | 986.1925 | 11.58    | 1077.209 | 11.54549 | 1027.442 | 11.67841 | 960.6432 |
| 1068.383 | 11.27055 | 986.2368 | 11.5843  | 1077.838 | 11.54683 | 1027.56  | 11.68    | 960.8823 |
| 1068.825 | 11.27167 | 986.272  | 11.59    | 1078.685 | 11.55    | 1027.958 | 11.68105 | 961.0404 |
| 1069.713 | 11.27297 | 986.3139 | 11.5943  | 1079.325 | 11.55153 | 1028.161 | 11.68841 | 962.1562 |
| 1070.164 | 11.27403 | 986.3487 | 11.6     | 1080.186 | 11.55592 | 1028.776 | 11.69    | 962.4025 |
| 1071.069 | 11.2752  | 986.3876 | 11.6043  | 1080.837 | 11.56    | 1029.335 | 11.69105 | 962.5654 |
| 1071.529 | 11.27636 | 986.4272 | 11.61    | 1081.712 | 11.56502 | 1030.024 | 11.69841 | 963.7147 |
| 1072.452 | 11.27753 | 986.4675 | 11.6143  | 1082.374 | 11.57    | 1030.718 | 11.7     | 963.9683 |
| 1072.921 | 11.2787  | 986.5083 | 11.62    | 1083.263 | 11.57502 | 1031.423 | 11.70105 | 964.1359 |
| 1073.862 | 11.28    | 986.5545 | 11.6243  | 1083.934 | 11.58    | 1032.131 | 11.70841 | 965.3188 |
| 1074.34  | 11.28113 | 986.5951 | 11.63    | 1084.837 | 11.58502 | 1032.848 | 11.71    | 965.5797 |
| 1075.298 | 11.28314 | 986.6689 | 11.6343  | 1085.519 | 11.59    | 1033.569 | 11.71105 | 965.7521 |
| 1075.786 | 11.28469 | 986.7266 | 11.64    | 1086.434 | 11.59502 | 1034.299 | 11.71841 | 966.9684 |
| 1076.762 | 11.28578 | 986.7679 | 11.6443  | 1087.126 | 11.6     | 1035.033 | 11.72    | 967.2366 |
| 1077.258 | 11.28687 | 986.8098 | 11.65    | 1088.054 | 11.60502 | 1035.776 | 11.72105 | 967.4138 |
| 1078.253 | 11.28858 | 986.8762 | 11.6543  | 1088.756 | 11.61    | 1036.522 | 11.72841 | 968.6637 |
| 1078.759 | 11.29    | 986.9322 | 11.66    | 1089.696 | 11.61502 | 1037.277 | 11.73    | 968.9391 |
| 1079.771 | 11.29101 | 986.9728 | 11.6643  | 1090.407 | 11.62    | 1038.035 | 11.73105 | 969.1211 |
| 1080.286 | 11.29264 | 987.0391 | 11.67    | 1091.36  | 11.62502 | 1038.802 | 11.73841 | 970.4046 |
| 1081.317 | 11.29418 | 987.1031 | 11.6743  | 1092.079 | 11.63    | 1039.571 | 11.74    | 970.6873 |
| 1081.841 | 11.29553 | 987.1598 | 11.68    | 1093.043 | 11.63502 | 1040.35  | 11.74105 | 970.8741 |
| 1082.89  | 11.2969  | 987.2183 | 11.6843  | 1093.772 | 11.64    | 1041.131 | 11.74841 | 972.1911 |
| 1083.118 | 11.29826 | 987.2777 | 11.69    | 1094.747 | 11.64502 | 1041.921 | 11.75    | 972.4811 |
| 1083.649 | 11.29963 | 987.3378 | 11.6943  | 1095.484 | 11.65    | 1042.713 | 11.75105 | 972.6727 |
| 1084.49  | 11.30143 | 987.4179 | 11.7     | 1096.471 | 11.65502 | 1043.515 | 11.75841 | 974.0233 |
| 1085.104 | 11.3034  | 987.5077 | 11.7043  | 1097.216 | 11.66    | 1044.318 | 11.76    | 974.3205 |
| 1086.117 | 11.30687 | 987.6706 | 11.71    | 1098.213 | 11.66502 | 1045.13  | 11.76105 | 974.5169 |
| 1086.741 | 11.30932 | 987.7889 | 11.7143  | 1098.966 | 11.67    | 1045.943 | 11.76841 | 975.9011 |
| 1087.77  | 11.31035 | 987.8388 | 11.72    | 1099.973 | 11.67502 | 1046.766 | 11.77    | 976.2056 |

|          |          |          |          |          |          |          |          |          |
|----------|----------|----------|----------|----------|----------|----------|----------|----------|
| 1088.404 | 11.31281 | 987.9592 | 11.7243  | 1100.734 | 11.68    | 1047.589 | 11.77105 | 976.4068 |
| 1089.449 | 11.31519 | 988.0799 | 11.72712 | 1101.236 | 11.68502 | 1048.422 | 11.77841 | 977.8246 |
| 1090.093 | 11.31728 | 988.1879 | 11.73    | 1101.749 | 11.69    | 1049.255 | 11.78    | 978.1364 |
| 1091.153 | 11.31937 | 988.2979 | 11.73228 | 1102.156 | 11.69502 | 1050.098 | 11.78105 | 978.3424 |
| 1091.806 | 11.32239 | 988.4586 | 11.74    | 1103.547 | 11.7     | 1050.941 | 11.78841 | 979.7938 |
| 1092.882 | 11.32448 | 988.5732 | 11.74228 | 1103.957 | 11.70502 | 1051.793 | 11.79    | 980.113  |
| 1093.544 | 11.32657 | 988.6897 | 11.75    | 1105.36  | 11.71    | 1052.645 | 11.79105 | 980.3238 |
| 1094.635 | 11.33    | 988.8859 | 11.75228 | 1105.774 | 11.71502 | 1053.506 | 11.79559 | 981.2379 |
| 1095.306 | 11.33239 | 989.0237 | 11.76    | 1107.189 | 11.72    | 1054.367 | 11.79797 | 981.7236 |
| 1096.41  | 11.34    | 989.4925 | 11.76228 | 1107.606 | 11.72502 | 1055.238 | 11.8     | 982.1386 |
| 1097.091 | 11.34239 | 989.6408 | 11.77    | 1109.033 | 11.73    | 1056.107 | 11.80232 | 982.6154 |
| 1098.209 | 11.35    | 990.1429 | 11.77228 | 1109.453 | 11.73502 | 1056.986 | 11.81    | 984.2222 |
| 1098.898 | 11.35239 | 990.3016 | 11.78    | 1110.891 | 11.74    | 1057.864 | 11.81232 | 984.7097 |
| 1100.03  | 11.36    | 990.837  | 11.78228 | 1111.315 | 11.74471 | 1058.695 | 11.82    | 986.3518 |
| 1100.727 | 11.36239 | 991.0062 | 11.79    | 1112.763 | 11.74706 | 1059.113 | 11.82232 | 986.85   |
| 1101.872 | 11.37    | 991.5748 | 11.79228 | 1113.19  | 11.75    | 1059.636 | 11.83    | 988.5277 |
| 1102.577 | 11.37239 | 991.7544 | 11.8     | 1114.648 | 11.75213 | 1060.015 | 11.83232 | 989.0366 |
| 1103.735 | 11.38    | 992.3563 | 11.80228 | 1115.078 | 11.76    | 1061.427 | 11.84    | 990.75   |
| 1104.448 | 11.38239 | 992.5463 | 11.81    | 1116.545 | 11.76213 | 1061.81  | 11.84137 | 991.0573 |
| 1105.619 | 11.39    | 993.1815 | 11.81228 | 1116.978 | 11.76944 | 1063.131 | 11.84261 | 991.3349 |
| 1106.339 | 11.39239 | 993.382  | 11.82    | 1118.454 | 11.77104 | 1063.422 | 11.85    | 993.0182 |
| 1107.522 | 11.4     | 994.0503 | 11.82228 | 1118.89  | 11.77835 | 1064.748 | 11.85124 | 993.3009 |
| 1108.25  | 11.40239 | 994.2612 | 11.83    | 1120.375 | 11.78    | 1065.049 | 11.85883 | 995.0623 |
| 1109.444 | 11.41    | 994.9628 | 11.83228 | 1120.813 | 11.78104 | 1065.239 | 11.86    | 995.3349 |
| 1110.179 | 11.41239 | 995.1842 | 11.84    | 1122.306 | 11.78835 | 1066.575 | 11.86108 | 995.5877 |
| 1111.385 | 11.42    | 995.919  | 11.84228 | 1122.746 | 11.79    | 1066.879 | 11.86867 | 997.3678 |
| 1112.127 | 11.42239 | 996.1508 | 11.85    | 1124.247 | 11.79104 | 1067.07  | 11.87    | 997.6827 |
| 1113.343 | 11.43    | 996.9189 | 11.85228 | 1124.69  | 11.79835 | 1068.416 | 11.87108 | 997.9407 |
| 1114.092 | 11.43239 | 997.1611 | 11.86    | 1126.198 | 11.8     | 1068.722 | 11.87867 | 999.7574 |
| 1115.319 | 11.44    | 997.9624 | 11.86228 | 1126.642 | 11.80104 | 1068.915 | 11.88    | 1000.079 |
| 1116.074 | 11.44239 | 998.215  | 11.87    | 1128.157 | 11.80835 | 1070.27  | 11.88108 | 1000.342 |
| 1116.891 | 11.45    | 999.0496 | 11.87228 | 1128.604 | 11.81    | 1070.577 | 11.88867 | 1002.196 |
| 1117.31  | 11.45239 | 999.3126 | 11.88    | 1130.125 | 11.81104 | 1070.772 | 11.89    | 1002.524 |
| 1117.692 | 11.46    | 1000.18  | 11.88228 | 1130.573 | 11.81835 | 1072.136 | 11.89108 | 1002.792 |
| 1119.196 | 11.46239 | 1000.454 | 11.89    | 1132.1   | 11.82    | 1072.445 | 11.89867 | 1004.684 |
| 1119.535 | 11.47    | 1001.355 | 11.89228 | 1132.551 | 11.82104 | 1072.641 | 11.9     | 1005.018 |
| 1121.043 | 11.47239 | 1001.639 | 11.9     | 1134.083 | 11.82835 | 1074.013 | 11.90108 | 1005.292 |
| 1121.34  | 11.48    | 1002.573 | 11.90228 | 1134.535 | 11.83    | 1074.324 | 11.90867 | 1007.222 |
| 1121.556 | 11.48239 | 1002.867 | 11.91    | 1136.073 | 11.83104 | 1074.521 | 11.91    | 1007.563 |
| 1123.076 | 11.49    | 1003.835 | 11.91228 | 1136.526 | 11.83835 | 1075.901 | 11.91108 | 1007.842 |
| 1123.375 | 11.49239 | 1004.14  | 11.91617 | 1137.303 | 11.84    | 1076.214 | 11.91828 | 1009.707 |
| 1123.593 | 11.5     | 1005.14  | 11.92    | 1138.04  | 11.84104 | 1076.412 | 11.92    | 1010.16  |
| 1125.124 | 11.50239 | 1005.456 | 11.92275 | 1138.48  | 11.84835 | 1077.8   | 11.92103 | 1010.43  |
| 1125.424 | 11.51    | 1006.49  | 11.92487 | 1138.75  | 11.85    | 1078.114 | 11.92797 | 1012.265 |
| 1125.644 | 11.51239 | 1006.815 | 11.92698 | 1138.979 | 11.85104 | 1078.313 | 11.93    | 1012.808 |
| 1127.185 | 11.52    | 1007.882 | 11.93    | 1139.269 | 11.85835 | 1079.708 | 11.93793 | 1014.946 |
| 1127.403 | 11.52239 | 1008.218 | 11.93242 | 1139.473 | 11.86    | 1080.024 | 11.94    | 1015.51  |



|          |          |          |          |          |          |          |          |          |
|----------|----------|----------|----------|----------|----------|----------|----------|----------|
| 1127.741 | 11.53    | 1009.319 | 11.9389  | 1140.164 | 11.86104 | 1080.224 | 11.94793 | 1017.69  |
| 1129.273 | 11.53158 | 1009.548 | 11.94    | 1140.286 | 11.86835 | 1081.625 | 11.95    | 1018.265 |
| 1129.568 | 11.53578 | 1010.166 | 11.94656 | 1141.175 | 11.87    | 1081.943 | 11.95793 | 1020.488 |
| 1129.787 | 11.54    | 1010.794 | 11.95    | 1141.674 | 11.87104 | 1082.143 | 11.96    | 1021.075 |
| 1131.324 | 11.5448  | 1011.513 | 11.95644 | 1142.611 | 11.87835 | 1083.551 | 11.96793 | 1023.342 |
| 1131.657 | 11.55    | 1012.311 | 11.96    | 1143.107 | 11.88    | 1083.87  | 11.97    | 1023.94  |
| 1131.877 | 11.5548  | 1013.051 | 11.96194 | 1143.37  | 11.88104 | 1084.071 | 11.97793 | 1026.251 |
| 1133.423 | 11.56    | 1013.871 | 11.96413 | 1143.655 | 11.88835 | 1085.484 | 11.98    | 1026.861 |
| 1133.757 | 11.5648  | 1014.632 | 11.96565 | 1143.844 | 11.89    | 1085.804 | 11.98793 | 1029.218 |
| 1133.979 | 11.57    | 1015.475 | 11.96712 | 1144.025 | 11.89104 | 1086.007 | 11.99    | 1029.84  |
| 1135.533 | 11.5748  | 1016.257 | 11.96876 | 1144.221 | 11.89835 | 1087.425 | 11.99793 | 1032.243 |
| 1135.869 | 11.58    | 1017.123 | 11.97    | 1144.368 | 11.9     | 1087.746 | 12       | 1032.877 |
| 1136.092 | 11.5848  | 1017.926 | 11.9726  | 1144.67  | 11.90104 | 1087.949 | 12.00793 | 1035.327 |
| 1137.654 | 11.59    | 1018.815 | 11.97385 | 1144.813 | 11.90835 | 1089.372 | 12.01    | 1035.973 |
| 1137.992 | 11.5948  | 1019.638 | 11.97644 | 1145.1   | 11.91    | 1089.694 | 12.01793 | 1038.471 |
| 1138.216 | 11.6     | 1020.55  | 11.98    | 1145.464 | 11.91104 | 1089.898 | 12.02    | 1039.13  |
| 1139.785 | 11.6048  | 1021.395 | 11.98296 | 1145.756 | 11.91835 | 1091.326 | 12.02793 | 1041.677 |
| 1140.125 | 11.61    | 1022.329 | 11.98556 | 1145.977 | 11.92    | 1091.649 | 12.03    | 1042.348 |
| 1140.35  | 11.61418 | 1023.083 | 11.98815 | 1146.172 | 11.92104 | 1091.854 | 12.03793 | 1044.945 |
| 1140.664 | 11.61523 | 1023.274 | 11.99    | 1146.299 | 11.92835 | 1093.286 | 12.04    | 1045.63  |
| 1141.352 | 11.61637 | 1023.482 | 11.99296 | 1146.49  | 11.93    | 1093.61  | 12.04793 | 1048.277 |
| 1141.782 | 11.61747 | 1023.682 | 11.99566 | 1146.627 | 11.93104 | 1093.816 | 12.05    | 1048.975 |
| 1142.002 | 11.61917 | 1023.995 | 12       | 1146.809 | 11.93835 | 1095.252 | 12.0563  | 1051.117 |
| 1142.418 | 11.62108 | 1024.347 | 12.00308 | 1146.93  | 11.94    | 1095.578 | 12.05757 | 1051.47  |
| 1142.88  | 11.62772 | 1025.59  | 12.00578 | 1147.018 | 11.94104 | 1095.783 | 12.05934 | 1051.785 |
| 1143.185 | 11.63    | 1026.019 | 12.00809 | 1147.086 | 11.94835 | 1097.225 | 12.06101 | 1052.036 |
| 1143.37  | 11.63759 | 1027.458 | 12.01    | 1147.138 | 11.95    | 1097.551 | 12.0634  | 1052.503 |
| 1143.498 | 11.64    | 1027.922 | 12.01264 | 1147.207 | 11.95104 | 1097.757 | 12.06555 | 1052.95  |
| 1143.745 | 11.64759 | 1029.394 | 12.01496 | 1147.258 | 11.95835 | 1099.203 | 12.07    | 1053.848 |
| 1143.91  | 11.65    | 1029.869 | 12.01704 | 1147.299 | 11.96    | 1099.53  | 12.07246 | 1054.342 |
| 1144.09  | 11.65759 | 1031.374 | 12.02    | 1147.347 | 11.96104 | 1099.737 | 12.08    | 1055.847 |
| 1144.302 | 11.66    | 1031.859 | 12.02238 | 1147.384 | 11.96835 | 1101.188 | 12.08246 | 1056.339 |
| 1144.458 | 11.66759 | 1033.397 | 12.02518 | 1147.416 | 11.97    | 1101.516 | 12.09    | 1057.854 |
| 1144.678 | 11.67    | 1033.893 | 12.02798 | 1147.444 | 11.97104 | 1101.724 | 12.09246 | 1058.348 |
| 1144.901 | 11.67759 | 1035.463 | 12.03    | 1147.461 | 11.97835 | 1103.178 | 12.1     | 1059.867 |
| 1145.089 | 11.68    | 1035.97  | 12.0332  | 1147.486 | 11.98    | 1103.508 | 12.10246 | 1060.362 |
| 1145.272 | 11.68759 | 1037.573 | 12.03651 | 1147.505 | 11.98104 | 1103.716 | 12.11    | 1061.885 |
| 1145.446 | 11.69    | 1038.09  | 12.03983 | 1147.521 | 11.98835 | 1105.175 | 12.11246 | 1062.382 |
| 1145.779 | 11.69759 | 1039.727 | 12.04379 | 1147.539 | 11.99    | 1105.506 | 12.12    | 1063.91  |
| 1146.144 | 11.7     | 1040.254 | 12.04774 | 1147.552 | 11.99104 | 1105.714 | 12.12246 | 1064.408 |
| 1146.373 | 11.70759 | 1041.923 | 12.05    | 1147.558 | 11.99835 | 1107.178 | 12.13    | 1065.941 |
| 1146.555 | 11.71    | 1042.461 | 12.05451 | 1147.57  | 12       | 1107.509 | 12.13246 | 1066.44  |
| 1146.657 | 11.71759 | 1044.164 | 12.06    | 1147.578 | 12.00104 | 1107.719 | 12.14    | 1067.977 |
| 1146.785 | 11.72    | 1044.712 | 12.06451 | 1147.584 | 12.00835 | 1109.187 | 12.14246 | 1068.478 |
| 1146.881 | 11.72148 | 1045.049 | 12.07    | 1147.589 | 12.01    | 1109.52  | 12.15    | 1070.02  |
| 1146.946 | 11.72505 | 1045.868 | 12.07451 | 1147.593 | 12.01104 | 1109.73  | 12.15246 | 1070.522 |
| 1147.012 | 11.72819 | 1046.591 | 12.08    | 1147.597 | 12.01835 | 1111.202 | 12.16    | 1072.068 |

|          |          |          |          |          |          |          |          |          |
|----------|----------|----------|----------|----------|----------|----------|----------|----------|
| 1147.078 | 11.73    | 1047.009 | 12.08451 | 1147.6   | 12.02    | 1111.536 | 12.16246 | 1072.572 |
| 1147.188 | 11.73297 | 1047.7   | 12.09    | 1147.604 | 12.02104 | 1111.747 | 12.17    | 1074.122 |
| 1147.253 | 11.74    | 1049.359 | 12.09451 | 1147.606 | 12.02835 | 1113.224 | 12.17502 | 1075.156 |
| 1147.308 | 11.74297 | 1050.063 | 12.1     | 1147.61  | 12.03    | 1113.558 | 12.18    | 1076.182 |
| 1147.361 | 11.75    | 1051.753 | 12.10451 | 1147.613 | 12.03104 | 1113.77  | 12.18484 | 1077.18  |
| 1147.411 | 11.75297 | 1052.47  | 12.11    | 1147.616 | 12.03835 | 1115.251 | 12.19    | 1078.247 |
| 1147.519 | 11.76    | 1054.192 | 12.11451 | 1147.619 | 12.04    | 1115.587 | 12.19484 | 1079.248 |
| 1147.565 | 11.76297 | 1054.922 | 12.12    | 1147.623 | 12.04104 | 1115.799 | 12.2     | 1080.319 |
| 1147.638 | 11.77    | 1056.676 | 12.12451 | 1147.626 | 12.04835 | 1117.285 | 12.20484 | 1081.322 |
| 1147.689 | 11.77297 | 1057.42  | 12.13    | 1147.63  | 12.05    | 1117.621 | 12.21    | 1082.395 |
| 1147.708 | 11.78    | 1059.206 | 12.13451 | 1147.633 | 12.05104 | 1117.834 | 12.21484 | 1083.402 |
| 1147.751 | 11.78297 | 1059.963 | 12.14    | 1147.637 | 12.05835 | 1119.325 | 12.22    | 1084.478 |
| 1147.774 | 11.79    | 1061.782 | 12.14451 | 1147.641 | 12.06    | 1119.662 | 12.22484 | 1085.487 |
| 1147.794 | 11.79297 | 1062.553 | 12.15    | 1147.645 | 12.06104 | 1119.875 | 12.23    | 1086.567 |
| 1147.82  | 11.8     | 1064.405 | 12.15451 | 1147.648 | 12.06835 | 1121.37  | 12.23484 | 1087.579 |
| 1147.841 | 11.80297 | 1065.19  | 12.16    | 1147.652 | 12.07    | 1121.709 | 12.24    | 1088.661 |
| 1147.857 | 11.81    | 1067.076 | 12.16451 | 1147.655 | 12.07104 | 1121.923 | 12.24484 | 1089.676 |
| 1147.863 | 11.81297 | 1067.875 | 12.17    | 1147.66  | 12.07835 | 1123.422 | 12.25    | 1090.762 |
| 1147.877 | 11.82    | 1069.794 | 12.17451 | 1147.663 | 12.08    | 1123.762 | 12.25484 | 1091.779 |
| 1147.891 | 11.82297 | 1070.609 | 12.18    | 1147.667 | 12.08104 | 1123.977 | 12.26    | 1092.868 |
| 1147.894 | 11.83    | 1072.562 | 12.18451 | 1147.671 | 12.08835 | 1125.48  | 12.26484 | 1093.888 |
| 1147.903 | 11.83297 | 1073.391 | 12.19    | 1147.675 | 12.09    | 1125.821 | 12.27    | 1094.979 |
| 1147.904 | 11.84    | 1075.379 | 12.19451 | 1147.678 | 12.09104 | 1126.036 | 12.27484 | 1096.002 |
| 1147.906 | 11.84297 | 1076.223 | 12.2     | 1147.682 | 12.09835 | 1127.545 | 12.28    | 1097.097 |
| 1147.908 | 11.85    | 1078.247 | 12.20451 | 1147.686 | 12.1     | 1127.886 | 12.28484 | 1098.123 |
| 1147.913 | 11.85297 | 1079.105 | 12.21    | 1147.69  | 12.10104 | 1128.102 | 12.29    | 1099.22  |
| 1147.916 | 11.86    | 1081.165 | 12.21451 | 1147.693 | 12.10835 | 1129.615 | 12.29484 | 1100.249 |
| 1147.918 | 11.86297 | 1082.039 | 12.22    | 1147.697 | 12.11    | 1129.958 | 12.3     | 1101.349 |
| 1147.917 | 11.87    | 1084.135 | 12.22451 | 1147.701 | 12.11176 | 1130.319 | 12.30484 | 1102.38  |
| 1147.916 | 11.87297 | 1085.025 | 12.23    | 1147.705 | 12.11455 | 1130.821 | 12.31    | 1103.484 |
| 1147.917 | 11.88    | 1087.158 | 12.23451 | 1147.708 | 12.11734 | 1131.244 | 12.31484 | 1104.518 |
| 1147.918 | 11.88297 | 1088.063 | 12.24    | 1147.713 | 12.12    | 1131.585 | 12.32    | 1105.624 |
| 1147.92  | 11.89    | 1090.235 | 12.24451 | 1147.716 | 12.12319 | 1131.961 | 12.32484 | 1106.661 |
| 1147.923 | 11.89297 | 1091.156 | 12.25    | 1147.72  | 12.12814 | 1132.462 | 12.33    | 1107.77  |
| 1147.924 | 11.9     | 1093.365 | 12.25451 | 1147.723 | 12.13    | 1132.656 | 12.33484 | 1108.809 |
| 1147.925 | 11.90297 | 1094.303 | 12.26    | 1147.728 | 12.13565 | 1133.296 | 12.34    | 1109.921 |
| 1147.926 | 11.90659 | 1095.454 | 12.26451 | 1147.731 | 12.14    | 1133.923 | 12.34484 | 1110.963 |
| 1147.927 | 11.90807 | 1095.837 | 12.27    | 1147.735 | 12.14516 | 1134.712 | 12.35    | 1112.078 |
| 1147.929 | 11.90922 | 1096.073 | 12.27451 | 1147.739 | 12.15    | 1135.435 | 12.35484 | 1113.123 |
| 1147.932 | 11.91131 | 1096.463 | 12.28    | 1147.743 | 12.15509 | 1136.176 | 12.36    | 1114.241 |
| 1147.933 | 11.91513 | 1097.274 | 12.28451 | 1147.746 | 12.16    | 1136.825 | 12.36484 | 1115.289 |
| 1147.936 | 11.91857 | 1098.024 | 12.29    | 1147.75  | 12.16509 | 1137.486 | 12.37    | 1116.409 |
| 1147.937 | 11.92    | 1098.334 | 12.29451 | 1147.753 | 12.17    | 1138.12  | 12.37484 | 1117.46  |
| 1147.939 | 11.92393 | 1099.183 | 12.3     | 1147.758 | 12.17509 | 1138.789 | 12.37808 | 1118.166 |
| 1147.941 | 11.9287  | 1100.208 | 12.30451 | 1147.761 | 12.18    | 1139.474 | 12.38    | 1118.579 |
| 1147.943 | 11.93    | 1100.486 | 12.31    | 1147.765 | 12.18509 | 1140.19  | 12.38378 | 1119.257 |
| 1147.945 | 11.93545 | 1101.662 | 12.31451 | 1147.768 | 12.19    | 1140.882 | 12.38623 | 1119.617 |

|          |          |          |          |          |          |          |          |          |
|----------|----------|----------|----------|----------|----------|----------|----------|----------|
| 1147.947 | 11.9393  | 1102.494 | 12.32    | 1147.772 | 12.19509 | 1141.592 | 12.38868 | 1119.924 |
| 1147.949 | 11.94055 | 1102.763 | 12.32451 | 1147.776 | 12.2     | 1142.255 | 12.39    | 1120.076 |
| 1147.951 | 11.9444  | 1103.595 | 12.33    | 1147.78  | 12.20509 | 1142.94  | 12.3928  | 1120.381 |
| 1147.953 | 11.95    | 1104.806 | 12.33451 | 1147.783 | 12.20913 | 1143.485 | 12.39875 | 1121.051 |
| 1147.955 | 11.9544  | 1105.759 | 12.34    | 1147.787 | 12.21074 | 1143.702 | 12.4     | 1121.197 |
| 1147.957 | 11.96    | 1106.973 | 12.34451 | 1147.79  | 12.21216 | 1143.894 | 12.40621 | 1122.063 |
| 1147.96  | 11.9644  | 1107.928 | 12.35    | 1147.794 | 12.21321 | 1144.037 | 12.41    | 1122.642 |
| 1147.961 | 11.97    | 1109.145 | 12.35451 | 1147.798 | 12.21425 | 1144.18  | 12.41612 | 1123.592 |
| 1147.964 | 11.9744  | 1110.102 | 12.36    | 1147.802 | 12.2153  | 1144.323 | 12.42    | 1124.189 |
| 1147.966 | 11.98    | 1111.321 | 12.36451 | 1147.805 | 12.21714 | 1144.571 | 12.42612 | 1125.099 |
| 1147.968 | 11.9844  | 1112.28  | 12.37    | 1147.809 | 12.21897 | 1144.815 | 12.43    | 1125.62  |
| 1147.97  | 11.99    | 1113.502 | 12.37451 | 1147.812 | 12.22    | 1144.949 | 12.43612 | 1126.436 |
| 1147.972 | 11.9944  | 1114.463 | 12.38    | 1147.816 | 12.2221  | 1145.216 | 12.44    | 1126.964 |
| 1147.974 | 12       | 1115.687 | 12.38451 | 1147.819 | 12.23    | 1145.945 | 12.44612 | 1127.824 |
| 1147.977 | 12.0044  | 1116.65  | 12.39    | 1147.823 | 12.2321  | 1146.131 | 12.45    | 1128.409 |
| 1147.978 | 12.01    | 1117.877 | 12.39451 | 1147.826 | 12.23589 | 1146.398 | 12.45612 | 1129.334 |
| 1147.981 | 12.0144  | 1118.842 | 12.4     | 1147.83  | 12.24    | 1146.638 | 12.46    | 1129.907 |
| 1147.983 | 12.02    | 1120.072 | 12.40451 | 1147.833 | 12.24434 | 1146.873 | 12.46612 | 1130.794 |
| 1147.986 | 12.0244  | 1121.039 | 12.41    | 1147.837 | 12.24651 | 1146.968 | 12.47    | 1131.329 |
| 1147.987 | 12.03    | 1122.272 | 12.41451 | 1147.84  | 12.24869 | 1147.055 | 12.47612 | 1132.175 |
| 1147.99  | 12.0344  | 1123.241 | 12.42    | 1147.844 | 12.25    | 1147.105 | 12.48    | 1132.723 |
| 1147.992 | 12.04    | 1124.476 | 12.42451 | 1147.847 | 12.25248 | 1147.196 | 12.48612 | 1133.605 |
| 1147.994 | 12.0444  | 1125.447 | 12.43    | 1147.851 | 12.25466 | 1147.264 | 12.49    | 1134.181 |
| 1147.996 | 12.05    | 1126.685 | 12.43451 | 1147.854 | 12.25661 | 1147.321 | 12.49612 | 1135.09  |
| 1147.999 | 12.0544  | 1127.658 | 12.44    | 1147.858 | 12.25857 | 1147.371 | 12.5     | 1135.655 |
| 1148     | 12.06    | 1128.898 | 12.44451 | 1147.861 | 12.26    | 1147.406 | 12.50612 | 1136.536 |
| 1148.003 | 12.0644  | 1129.874 | 12.45    | 1147.865 | 12.26224 | 1147.457 | 12.51    | 1137.082 |
| 1148.005 | 12.06546 | 1130.109 | 12.45451 | 1147.868 | 12.26459 | 1147.5   | 12.51612 | 1137.948 |
| 1148.008 | 12.07    | 1130.994 | 12.46    | 1147.872 | 12.26694 | 1147.536 | 12.52    | 1138.507 |
| 1148.009 | 12.07106 | 1131.19  | 12.46451 | 1147.875 | 12.27    | 1147.576 | 12.52612 | 1139.398 |
| 1148.012 | 12.07341 | 1131.547 | 12.47    | 1147.879 | 12.27269 | 1147.608 | 12.53    | 1139.97  |
| 1148.014 | 12.07576 | 1131.854 | 12.47451 | 1147.882 | 12.27559 | 1147.635 | 12.53612 | 1140.87  |
| 1148.017 | 12.08    | 1132.337 | 12.48    | 1147.886 | 12.2785  | 1147.658 | 12.54    | 1141.432 |
| 1148.018 | 12.08269 | 1132.636 | 12.48451 | 1147.889 | 12.28    | 1147.668 | 12.54612 | 1142.315 |
| 1148.021 | 12.09    | 1133.594 | 12.49    | 1147.892 | 12.28332 | 1147.691 | 12.55    | 1142.87  |
| 1148.023 | 12.09269 | 1133.957 | 12.49451 | 1147.895 | 12.28659 | 1147.708 | 12.55431 | 1143.488 |
| 1148.026 | 12.09935 | 1134.987 | 12.5     | 1147.899 | 12.28986 | 1147.722 | 12.55557 | 1143.671 |
| 1148.027 | 12.10095 | 1135.239 | 12.50451 | 1147.902 | 12.29374 | 1147.737 | 12.55733 | 1143.925 |
| 1148.03  | 12.10761 | 1136.282 | 12.51    | 1147.905 | 12.3     | 1147.751 | 12.55899 | 1144.166 |
| 1148.032 | 12.11    | 1136.653 | 12.51451 | 1147.908 | 12.30374 | 1147.759 | 12.56    | 1144.311 |
| 1148.035 | 12.11761 | 1137.789 | 12.52    | 1147.912 | 12.31    | 1147.767 | 12.563   | 1144.737 |
| 1148.036 | 12.12    | 1138.112 | 12.52451 | 1147.915 | 12.31374 | 1147.771 | 12.56463 | 1144.96  |
| 1148.039 | 12.12761 | 1139.142 | 12.53    | 1147.918 | 12.32    | 1147.777 | 12.56819 | 1145.403 |
| 1148.041 | 12.13    | 1139.47  | 12.53451 | 1147.921 | 12.32374 | 1147.78  | 12.57    | 1145.614 |
| 1148.044 | 12.13761 | 1140.566 | 12.54    | 1147.925 | 12.33    | 1147.785 | 12.57408 | 1146.06  |
| 1148.045 | 12.14    | 1140.944 | 12.54451 | 1147.928 | 12.33374 | 1147.787 | 12.57986 | 1146.504 |
| 1148.048 | 12.14761 | 1142.147 | 12.55    | 1147.931 | 12.34    | 1147.791 | 12.58661 | 1146.962 |

|          |          |          |          |          |          |          |          |          |
|----------|----------|----------|----------|----------|----------|----------|----------|----------|
| 1148.05  | 12.15    | 1142.517 | 12.55451 | 1147.934 | 12.34374 | 1147.793 | 12.59    | 1147.124 |
| 1148.052 | 12.15695 | 1143.519 | 12.56    | 1147.938 | 12.35    | 1147.797 | 12.59166 | 1147.199 |
| 1148.054 | 12.15795 | 1143.66  | 12.56451 | 1147.94  | 12.35374 | 1147.8   | 12.59312 | 1147.261 |
| 1148.057 | 12.15926 | 1143.844 | 12.57    | 1147.944 | 12.36    | 1147.804 | 12.59457 | 1147.319 |
| 1148.058 | 12.16069 | 1144.043 | 12.57451 | 1147.947 | 12.36374 | 1147.806 | 12.59712 | 1147.412 |
| 1148.061 | 12.16214 | 1144.243 | 12.58    | 1147.95  | 12.37    | 1147.81  | 12.59919 | 1147.48  |
| 1148.063 | 12.16326 | 1144.397 | 12.58451 | 1147.953 | 12.37374 | 1147.813 | 12.6003  | 1147.516 |
| 1148.066 | 12.16438 | 1144.549 | 12.59    | 1147.956 | 12.38    | 1147.817 | 12.60236 | 1147.579 |
| 1148.067 | 12.16549 | 1144.7   | 12.59451 | 1147.959 | 12.38374 | 1147.82  | 12.60443 | 1147.631 |
| 1148.07  | 12.16745 | 1144.962 | 12.6     | 1147.962 | 12.39    | 1147.824 | 12.6065  | 1147.678 |
| 1148.072 | 12.1694  | 1145.219 | 12.60451 | 1147.965 | 12.39374 | 1147.826 | 12.60857 | 1147.718 |
| 1148.074 | 12.1708  | 1145.398 | 12.61    | 1147.968 | 12.4     | 1147.831 | 12.61    | 1147.745 |
| 1148.076 | 12.17318 | 1145.68  | 12.61451 | 1147.971 | 12.40374 | 1147.833 | 12.61236 | 1147.784 |
| 1148.079 | 12.17556 | 1145.938 | 12.62    | 1147.974 | 12.41    | 1147.838 | 12.61511 | 1147.818 |
| 1148.08  | 12.1794  | 1146.29  | 12.62451 | 1147.977 | 12.41374 | 1147.84  | 12.61786 | 1147.847 |
| 1148.083 | 12.18055 | 1146.391 | 12.63    | 1147.98  | 12.42    | 1147.845 | 12.62    | 1147.867 |
| 1148.084 | 12.18439 | 1146.702 | 12.63451 | 1147.983 | 12.42374 | 1147.847 | 12.62314 | 1147.894 |
| 1148.087 | 12.1878  | 1146.905 | 12.64    | 1147.986 | 12.43    | 1147.852 | 12.62604 | 1147.913 |
| 1148.089 | 12.19    | 1147.023 | 12.64451 | 1147.989 | 12.43374 | 1147.854 | 12.62894 | 1147.93  |
| 1148.091 | 12.19389 | 1147.218 | 12.65    | 1147.992 | 12.44    | 1147.859 | 12.63    | 1147.936 |
| 1148.093 | 12.19583 | 1147.298 | 12.65451 | 1147.995 | 12.44374 | 1147.861 | 12.63331 | 1147.953 |
| 1148.096 | 12.19777 | 1147.373 | 12.66    | 1147.998 | 12.45    | 1147.865 | 12.63901 | 1147.971 |
| 1148.097 | 12.19971 | 1147.443 | 12.66451 | 1148     | 12.45374 | 1147.868 | 12.64081 | 1147.976 |
| 1148.1   | 12.20222 | 1147.529 | 12.67    | 1148.004 | 12.46    | 1147.872 | 12.64651 | 1147.99  |
| 1148.101 | 12.20416 | 1147.587 | 12.67451 | 1148.006 | 12.46374 | 1147.875 | 12.65    | 1147.994 |
| 1148.104 | 12.2059  | 1147.635 | 12.68    | 1148.009 | 12.47    | 1147.879 | 12.65651 | 1148.001 |
| 1148.105 | 12.20765 | 1147.679 | 12.68451 | 1148.012 | 12.47374 | 1147.882 | 12.66    | 1148.003 |
| 1148.108 | 12.21    | 1147.73  | 12.69    | 1148.015 | 12.48    | 1147.886 | 12.66651 | 1148.008 |
| 1148.11  | 12.21199 | 1147.771 | 12.69451 | 1148.017 | 12.48374 | 1147.888 | 12.67    | 1148.01  |
| 1148.112 | 12.21452 | 1147.811 | 12.7     | 1148.02  | 12.49    | 1147.892 | 12.67651 | 1148.013 |
| 1148.114 | 12.21704 | 1147.845 | 12.70451 | 1148.023 | 12.49374 | 1147.895 | 12.68    | 1148.015 |
| 1148.116 | 12.22    | 1147.877 | 12.71    | 1148.026 | 12.5     | 1147.899 | 12.68651 | 1148.017 |
| 1148.118 | 12.22288 | 1147.906 | 12.71451 | 1148.028 | 12.50374 | 1147.902 | 12.69    | 1148.019 |
| 1148.12  | 12.22582 | 1147.928 | 12.72    | 1148.031 | 12.51    | 1147.906 | 12.69651 | 1148.021 |
| 1148.122 | 12.22877 | 1147.947 | 12.72451 | 1148.034 | 12.51374 | 1147.908 | 12.7     | 1148.023 |
| 1148.124 | 12.23    | 1147.954 | 12.73    | 1148.037 | 12.52    | 1147.912 | 12.70651 | 1148.026 |
| 1148.126 | 12.23336 | 1147.974 | 12.73451 | 1148.039 | 12.52374 | 1147.915 | 12.71    | 1148.028 |
| 1148.128 | 12.23666 | 1147.988 | 12.74    | 1148.042 | 12.53    | 1147.919 | 12.71651 | 1148.031 |
| 1148.13  | 12.23996 | 1147.999 | 12.74451 | 1148.044 | 12.53374 | 1147.921 | 12.72    | 1148.033 |
| 1148.132 | 12.24377 | 1148.011 | 12.75    | 1148.047 | 12.54    | 1147.925 | 12.72651 | 1148.036 |
| 1148.133 | 12.25    | 1148.021 | 12.75451 | 1148.05  | 12.54374 | 1147.928 | 12.73    | 1148.037 |
| 1148.136 | 12.25377 | 1148.026 | 12.76    | 1148.052 | 12.55    | 1147.932 | 12.73651 | 1148.041 |
| 1148.137 | 12.26    | 1148.031 | 12.76451 | 1148.055 | 12.55374 | 1147.934 | 12.74    | 1148.042 |
| 1148.14  | 12.26377 | 1148.034 | 12.77    | 1148.058 | 12.56    | 1147.938 | 12.74651 | 1148.046 |
| 1148.141 | 12.27    | 1148.037 | 12.77451 | 1148.06  | 12.56374 | 1147.94  | 12.75    | 1148.048 |
| 1148.144 | 12.27377 | 1148.039 | 12.78    | 1148.063 | 12.57    | 1147.944 | 12.75651 | 1148.051 |
| 1148.145 | 12.28    | 1148.041 | 12.78451 | 1148.065 | 12.57374 | 1147.947 | 12.76    | 1148.053 |

|          |          |          |          |          |          |          |          |          |
|----------|----------|----------|----------|----------|----------|----------|----------|----------|
| 1148.147 | 12.28377 | 1148.043 | 12.79    | 1148.068 | 12.58    | 1147.95  | 12.76651 | 1148.056 |
| 1148.149 | 12.29    | 1148.045 | 12.79451 | 1148.07  | 12.58374 | 1147.953 | 12.77    | 1148.058 |
| 1148.151 | 12.29377 | 1148.046 | 12.8     | 1148.073 | 12.59    | 1147.957 | 12.77651 | 1148.061 |
| 1148.152 | 12.3     | 1148.048 | 12.80451 | 1148.075 | 12.59374 | 1147.959 | 12.78    | 1148.063 |
| 1148.155 | 12.30377 | 1148.049 | 12.81    | 1148.078 | 12.6     | 1147.963 | 12.78651 | 1148.066 |
| 1148.156 | 12.31    | 1148.051 | 12.81451 | 1148.08  | 12.60374 | 1147.965 | 12.79    | 1148.068 |
| 1148.158 | 12.31377 | 1148.053 | 12.82    | 1148.082 | 12.61    | 1147.969 | 12.79651 | 1148.071 |
| 1148.16  | 12.32    | 1148.055 | 12.82451 | 1148.085 | 12.61374 | 1147.971 | 12.8     | 1148.073 |
| 1148.162 | 12.32377 | 1148.057 | 12.83    | 1148.087 | 12.62    | 1147.975 | 12.80651 | 1148.076 |
| 1148.163 | 12.33    | 1148.059 | 12.83451 | 1148.089 | 12.62374 | 1147.977 | 12.81    | 1148.078 |
| 1148.166 | 12.33377 | 1148.061 | 12.84    | 1148.092 | 12.63    | 1147.981 | 12.81651 | 1148.081 |
| 1148.167 | 12.34    | 1148.063 | 12.84451 | 1148.094 | 12.63374 | 1147.983 | 12.82    | 1148.083 |
| 1148.169 | 12.34377 | 1148.065 | 12.85    | 1148.097 | 12.64    | 1147.987 | 12.82651 | 1148.086 |
| 1148.17  | 12.35    | 1148.067 | 12.85451 | 1148.099 | 12.64374 | 1147.989 | 12.83    | 1148.088 |
| 1148.173 | 12.35377 | 1148.069 | 12.86    | 1148.101 | 12.65    | 1147.992 | 12.83651 | 1148.091 |
| 1148.174 | 12.36    | 1148.072 | 12.86451 | 1148.103 | 12.65374 | 1147.995 | 12.84    | 1148.092 |
| 1148.176 | 12.36377 | 1148.073 | 12.87    | 1148.106 | 12.66    | 1147.998 | 12.84651 | 1148.095 |
| 1148.177 | 12.37    | 1148.076 | 12.87451 | 1148.108 | 12.66374 | 1148     | 12.85    | 1148.097 |
| 1148.179 | 12.37377 | 1148.078 | 12.88    | 1148.11  | 12.67    | 1148.004 | 12.85651 | 1148.1   |
| 1148.181 | 12.38    | 1148.08  | 12.88451 | 1148.112 | 12.67374 | 1148.006 | 12.86    | 1148.102 |
| 1148.183 | 12.38377 | 1148.082 | 12.89    | 1148.115 | 12.68    | 1148.009 | 12.86651 | 1148.105 |
| 1148.184 | 12.39    | 1148.084 | 12.89451 | 1148.117 | 12.68374 | 1148.012 | 12.87    | 1148.106 |
| 1148.186 | 12.39377 | 1148.086 | 12.9     | 1148.119 | 12.69    | 1148.015 | 12.87651 | 1148.109 |
| 1148.187 | 12.4     | 1148.089 | 12.90451 | 1148.121 | 12.69374 | 1148.017 | 12.88    | 1148.111 |
| 1148.19  | 12.40377 | 1148.09  | 12.91    | 1148.123 | 12.7     | 1148.021 | 12.88651 | 1148.114 |
| 1148.191 | 12.41    | 1148.093 | 12.91451 | 1148.125 | 12.70374 | 1148.023 | 12.89    | 1148.115 |
| 1148.193 | 12.41377 | 1148.094 | 12.92    | 1148.128 | 12.71    | 1148.026 | 12.89651 | 1148.118 |
| 1148.194 | 12.42    | 1148.097 | 12.92451 | 1148.13  | 12.71374 | 1148.028 | 12.9     | 1148.12  |
| 1148.196 | 12.42377 | 1148.099 | 12.93    | 1148.132 | 12.72    | 1148.032 | 12.90651 | 1148.122 |
| 1148.197 | 12.43    | 1148.101 | 12.93451 | 1148.134 | 12.72374 | 1148.034 | 12.91    | 1148.124 |
| 1148.199 | 12.43377 | 1148.103 | 12.94    | 1148.136 | 12.73    | 1148.037 | 12.91651 | 1148.127 |
| 1148.2   | 12.44    | 1148.105 | 12.94451 | 1148.138 | 12.73374 | 1148.039 | 12.92    | 1148.128 |
| 1148.202 | 12.44377 | 1148.107 | 12.95    | 1148.14  | 12.74    | 1148.042 | 12.92651 | 1148.131 |
| 1148.203 | 12.45    | 1148.109 | 12.95451 | 1148.142 | 12.74374 | 1148.044 | 12.93    | 1148.132 |
| 1148.205 | 12.45377 | 1148.111 | 12.96    | 1148.144 | 12.75    | 1148.047 | 12.93651 | 1148.135 |
| 1148.207 | 12.46    | 1148.114 | 12.96451 | 1148.146 | 12.75374 | 1148.049 | 12.94    | 1148.137 |
| 1148.208 | 12.46377 | 1148.115 | 12.97    | 1148.148 | 12.76    | 1148.053 | 12.94651 | 1148.139 |
| 1148.21  | 12.47    | 1148.118 | 12.97451 | 1148.15  | 12.76374 | 1148.055 | 12.95    | 1148.141 |
| 1148.211 | 12.47377 | 1148.119 | 12.98    | 1148.152 | 12.77    | 1148.058 | 12.95651 | 1148.143 |
| 1148.213 | 12.48    | 1148.122 | 12.98451 | 1148.154 | 12.77374 | 1148.06  | 12.96    | 1148.145 |
| 1148.214 | 12.48377 | 1148.123 | 12.99    | 1148.156 | 12.78    | 1148.063 | 12.96651 | 1148.147 |
| 1148.216 | 12.49    | 1148.126 | 12.99451 | 1148.158 | 12.78374 | 1148.065 | 12.97    | 1148.149 |
| 1148.217 | 12.49377 | 1148.127 | 13       | 1148.16  | 12.79    | 1148.068 | 12.97651 | 1148.151 |
| 1148.218 | 12.5     | 1148.129 | 13.00451 | 1148.162 | 12.79374 | 1148.07  | 12.98    | 1148.153 |
| 1148.22  | 12.50377 | 1148.131 | 13.01    | 1148.164 | 12.8     | 1148.073 | 12.98651 | 1148.155 |
| 1148.221 | 12.51    | 1148.133 | 13.01451 | 1148.166 | 12.80374 | 1148.075 | 12.99    | 1148.157 |
| 1148.223 | 12.51377 | 1148.135 | 13.02    | 1148.168 | 12.81    | 1148.078 | 12.99651 | 1148.159 |

|          |          |          |          |          |          |          |          |          |
|----------|----------|----------|----------|----------|----------|----------|----------|----------|
| 1148.224 | 12.52    | 1148.137 | 13.02451 | 1148.169 | 12.81374 | 1148.08  | 13       | 1148.161 |
| 1148.226 | 12.52377 | 1148.139 | 13.03    | 1148.171 | 12.82    | 1148.083 | 13.00651 | 1148.163 |
| 1148.227 | 12.53    | 1148.141 | 13.03451 | 1148.173 | 12.82374 | 1148.084 | 13.01    | 1148.164 |
| 1148.229 | 12.53377 | 1148.142 | 13.04    | 1148.175 | 12.83    | 1148.087 | 13.01651 | 1148.167 |
| 1148.23  | 12.54    | 1148.145 | 13.04451 | 1148.177 | 12.83374 | 1148.089 | 13.02    | 1148.168 |
| 1148.232 | 12.54377 | 1148.146 | 13.05    | 1148.179 | 12.84    | 1148.092 | 13.02651 | 1148.171 |
| 1148.233 | 12.55    | 1148.149 | 13.05451 | 1148.18  | 12.84374 | 1148.094 | 13.03    | 1148.172 |
| 1148.234 | 12.55377 | 1148.15  | 13.06    | 1148.182 | 12.85    | 1148.097 | 13.03651 | 1148.174 |
| 1148.235 | 12.56    | 1148.152 | 13.06451 | 1148.184 | 12.85374 | 1148.098 | 13.04    | 1148.176 |
| 1148.237 | 12.56377 | 1148.154 | 13.07    | 1148.186 | 12.86    | 1148.101 | 13.04651 | 1148.178 |
| 1148.238 | 12.57    | 1148.156 | 13.07451 | 1148.187 | 12.86374 | 1148.103 | 13.05    | 1148.179 |
| 1148.24  | 12.57377 | 1148.157 | 13.08    | 1148.189 | 12.87    | 1148.106 | 13.05651 | 1148.181 |
| 1148.241 | 12.58    | 1148.16  | 13.08451 | 1148.191 | 12.87374 | 1148.108 | 13.06    | 1148.183 |
| 1148.242 | 12.58377 | 1148.161 | 13.09    | 1148.193 | 12.88    | 1148.11  | 13.06651 | 1148.185 |
| 1148.243 | 12.59    | 1148.163 | 13.09451 | 1148.194 | 12.88374 | 1148.112 | 13.07    | 1148.186 |
| 1148.245 | 12.59377 | 1148.165 | 13.1     | 1148.196 | 12.89    | 1148.115 | 13.07651 | 1148.188 |
| 1148.246 | 12.6     | 1148.167 | 13.10451 | 1148.197 | 12.89374 | 1148.117 | 13.08    | 1148.19  |
| 1148.247 | 12.60377 | 1148.168 | 13.11    | 1148.199 | 12.9     | 1148.119 | 13.08651 | 1148.192 |
| 1148.248 | 12.61    | 1148.17  | 13.11451 | 1148.201 | 12.90374 | 1148.121 | 13.09    | 1148.193 |
| 1148.25  | 12.61377 | 1148.172 | 13.12    | 1148.202 | 12.91    | 1148.124 | 13.09651 | 1148.195 |
| 1148.251 | 12.62    | 1148.174 | 13.12451 | 1148.204 | 12.91374 | 1148.125 | 13.1     | 1148.196 |
| 1148.252 | 12.62377 | 1148.175 | 13.13    | 1148.206 | 12.92    | 1148.128 | 13.10651 | 1148.199 |
| 1148.253 | 12.63    | 1148.177 | 13.13451 | 1148.207 | 12.92374 | 1148.13  | 13.11    | 1148.2   |
| 1148.255 | 12.63377 | 1148.178 | 13.14    | 1148.209 | 12.93    | 1148.132 | 13.11651 | 1148.202 |
| 1148.256 | 12.64    | 1148.181 | 13.14451 | 1148.21  | 12.93374 | 1148.134 | 13.12    | 1148.203 |
| 1148.257 | 12.64377 | 1148.182 | 13.15    | 1148.212 | 12.94    | 1148.136 | 13.12651 | 1148.205 |
| 1148.258 | 12.65    | 1148.184 | 13.15451 | 1148.213 | 12.94374 | 1148.138 | 13.13    | 1148.206 |
| 1148.259 | 12.65377 | 1148.185 | 13.16    | 1148.215 | 12.95    | 1148.14  | 13.13651 | 1148.208 |
| 1148.26  | 12.66    | 1148.187 | 13.16451 | 1148.216 | 12.95374 | 1148.142 | 13.14    | 1148.209 |
| 1148.262 | 12.66377 | 1148.188 | 13.17    | 1148.218 | 12.96    | 1148.145 | 13.14651 | 1148.211 |
| 1148.263 | 12.67    | 1148.19  | 13.17451 | 1148.219 | 12.96374 | 1148.146 | 13.15    | 1148.212 |
| 1148.264 | 12.67377 | 1148.192 | 13.18    | 1148.221 | 12.97    | 1148.149 | 13.15651 | 1148.214 |
| 1148.265 | 12.68    | 1148.194 | 13.18451 | 1148.222 | 12.97374 | 1148.15  | 13.16    | 1148.216 |
| 1148.266 | 12.68377 | 1148.195 | 13.19    | 1148.224 | 12.98    | 1148.152 | 13.16651 | 1148.218 |
| 1148.267 | 12.69    | 1148.197 | 13.19451 | 1148.225 | 12.98374 | 1148.154 | 13.17    | 1148.219 |
| 1148.269 | 12.69377 | 1148.198 | 13.2     | 1148.227 | 12.99    | 1148.156 | 13.17651 | 1148.221 |
| 1148.269 | 12.7     | 1148.2   | 13.20451 | 1148.228 | 12.99374 | 1148.158 | 13.18    | 1148.222 |
| 1148.271 | 12.70377 | 1148.201 | 13.21    | 1148.23  | 13       | 1148.16  | 13.18651 | 1148.223 |
| 1148.272 | 12.71    | 1148.203 | 13.21451 | 1148.231 | 13.00374 | 1148.162 | 13.19    | 1148.224 |
| 1148.273 | 12.71377 | 1148.204 | 13.22    | 1148.233 | 13.01    | 1148.164 | 13.19651 | 1148.226 |
| 1148.274 | 12.72    | 1148.206 | 13.22451 | 1148.234 | 13.01374 | 1148.165 | 13.2     | 1148.227 |
| 1148.275 | 12.72377 | 1148.207 | 13.23    | 1148.235 | 13.02    | 1148.168 | 13.20651 | 1148.229 |
| 1148.276 | 12.73    | 1148.209 | 13.23451 | 1148.237 | 13.02374 | 1148.169 | 13.21    | 1148.23  |
| 1148.277 | 12.73377 | 1148.21  | 13.24    | 1148.238 | 13.03    | 1148.172 | 13.21651 | 1148.232 |
| 1148.278 | 12.74    | 1148.212 | 13.24451 | 1148.239 | 13.03374 | 1148.173 | 13.22    | 1148.233 |
| 1148.279 | 12.74377 | 1148.213 | 13.25    | 1148.241 | 13.04    | 1148.175 | 13.22651 | 1148.235 |
| 1148.28  | 12.75    | 1148.215 | 13.25451 | 1148.242 | 13.04374 | 1148.177 | 13.23    | 1148.236 |

|          |          |          |          |          |          |          |          |          |
|----------|----------|----------|----------|----------|----------|----------|----------|----------|
| 1148.281 | 12.75377 | 1148.216 | 13.26    | 1148.243 | 13.05    | 1148.179 | 13.23651 | 1148.238 |
| 1148.282 | 12.76    | 1148.218 | 13.26451 | 1148.245 | 13.05374 | 1148.18  | 13.24    | 1148.239 |
| 1148.283 | 12.76377 | 1148.219 | 13.27    | 1148.246 | 13.06    | 1148.182 | 13.24651 | 1148.24  |
| 1148.284 | 12.77    | 1148.221 | 13.27451 | 1148.247 | 13.06374 | 1148.184 | 13.25    | 1148.241 |
| 1148.285 | 12.77377 | 1148.222 | 13.28    | 1148.249 | 13.07    | 1148.186 | 13.25651 | 1148.243 |
| 1148.286 | 12.78    | 1148.224 | 13.28451 | 1148.25  | 13.07374 | 1148.187 | 13.26    | 1148.244 |
| 1148.287 | 12.78377 | 1148.225 | 13.29    | 1148.251 | 13.08    | 1148.189 | 13.26651 | 1148.246 |
| 1148.288 | 12.79    | 1148.227 | 13.29451 | 1148.252 | 13.08374 | 1148.191 | 13.27    | 1148.246 |
| 1148.289 | 12.79377 | 1148.228 | 13.3     | 1148.254 | 13.09    | 1148.193 | 13.27651 | 1148.248 |
| 1148.29  | 12.8     | 1148.23  | 13.30451 | 1148.255 | 13.09374 | 1148.194 | 13.28    | 1148.249 |
| 1148.291 | 12.80377 | 1148.231 | 13.31    | 1148.256 | 13.1     | 1148.196 | 13.28651 | 1148.251 |
| 1148.292 | 12.81    | 1148.232 | 13.31451 | 1148.257 | 13.10374 | 1148.197 | 13.29    | 1148.252 |
| 1148.293 | 12.81377 | 1148.233 | 13.32    | 1148.259 | 13.11    | 1148.199 | 13.29651 | 1148.253 |
| 1148.294 | 12.82    | 1148.235 | 13.32451 | 1148.26  | 13.11374 | 1148.201 | 13.3     | 1148.254 |
| 1148.295 | 12.82377 | 1148.236 | 13.33    | 1148.261 | 13.12    | 1148.203 | 13.30651 | 1148.256 |
| 1148.295 | 12.83    | 1148.238 | 13.33451 | 1148.262 | 13.12374 | 1148.204 | 13.31    | 1148.257 |
| 1148.297 | 12.83377 | 1148.239 | 13.34    | 1148.263 | 13.13    | 1148.206 | 13.31651 | 1148.258 |
| 1148.297 | 12.84    | 1148.24  | 13.34451 | 1148.264 | 13.13374 | 1148.207 | 13.32    | 1148.259 |
| 1148.298 | 12.84377 | 1148.241 | 13.35    | 1148.266 | 13.14    | 1148.209 | 13.32651 | 1148.26  |
| 1148.299 | 12.85    | 1148.243 | 13.35451 | 1148.267 | 13.14374 | 1148.21  | 13.33    | 1148.261 |
| 1148.3   | 12.85377 | 1148.244 | 13.36    | 1148.268 | 13.15    | 1148.212 | 13.33651 | 1148.263 |
| 1148.301 | 12.86    | 1148.245 | 13.36451 | 1148.269 | 13.15374 | 1148.213 | 13.34    | 1148.264 |
| 1148.302 | 12.86377 | 1148.246 | 13.37    | 1148.27  | 13.16    | 1148.215 | 13.34651 | 1148.265 |
| 1148.302 | 12.87    | 1148.248 | 13.37451 | 1148.271 | 13.16374 | 1148.216 | 13.35    | 1148.266 |
| 1148.303 | 12.87377 | 1148.249 | 13.38    | 1148.272 | 13.17    | 1148.218 | 13.35651 | 1148.267 |
| 1148.304 | 12.88    | 1148.25  | 13.38451 | 1148.273 | 13.17374 | 1148.219 | 13.36    | 1148.268 |
| 1148.305 | 12.88377 | 1148.251 | 13.39    | 1148.274 | 13.18    | 1148.221 | 13.36651 | 1148.27  |
| 1148.306 | 12.89    | 1148.253 | 13.39451 | 1148.275 | 13.18374 | 1148.222 | 13.37    | 1148.27  |
| 1148.307 | 12.89377 | 1148.254 | 13.4     | 1148.277 | 13.19    | 1148.224 | 13.37651 | 1148.272 |
| 1148.307 | 12.9     | 1148.255 | 13.40451 | 1148.278 | 13.19374 | 1148.225 | 13.38    | 1148.273 |
| 1148.308 | 12.90377 | 1148.256 | 13.41    | 1148.279 | 13.2     | 1148.227 | 13.38651 | 1148.274 |
| 1148.309 | 12.91    | 1148.258 | 13.41451 | 1148.28  | 13.20374 | 1148.228 | 13.39    | 1148.275 |
| 1148.31  | 12.91377 | 1148.259 | 13.42    | 1148.281 | 13.21    | 1148.23  | 13.39651 | 1148.276 |
| 1148.311 | 12.92    | 1148.26  | 13.42451 | 1148.282 | 13.21374 | 1148.231 | 13.4     | 1148.277 |
| 1148.312 | 12.92377 | 1148.261 | 13.43    | 1148.283 | 13.22    | 1148.233 | 13.40651 | 1148.278 |
| 1148.312 | 12.93    | 1148.262 | 13.43451 | 1148.284 | 13.22374 | 1148.234 | 13.41    | 1148.279 |
| 1148.313 | 12.93377 | 1148.263 | 13.44    | 1148.285 | 13.23    | 1148.235 | 13.41651 | 1148.28  |
| 1148.314 | 12.94    | 1148.265 | 13.44451 | 1148.286 | 13.23374 | 1148.236 | 13.42    | 1148.281 |
| 1148.315 | 12.94377 | 1148.265 | 13.45    | 1148.287 | 13.24    | 1148.238 | 13.42651 | 1148.283 |
| 1148.315 | 12.95    | 1148.267 | 13.45451 | 1148.288 | 13.24374 | 1148.239 | 13.43    | 1148.283 |
| 1148.316 | 12.95377 | 1148.268 | 13.46    | 1148.289 | 13.25    | 1148.241 | 13.43651 | 1148.285 |
| 1148.317 | 12.96    | 1148.269 | 13.46451 | 1148.29  | 13.25374 | 1148.242 | 13.44    | 1148.285 |
| 1148.318 | 12.96377 | 1148.27  | 13.47    | 1148.291 | 13.26    | 1148.243 | 13.44651 | 1148.287 |
| 1148.318 | 12.97    | 1148.271 | 13.47451 | 1148.292 | 13.26374 | 1148.244 | 13.45    | 1148.287 |
| 1148.319 | 12.97377 | 1148.272 | 13.48    | 1148.293 | 13.27    | 1148.246 | 13.45651 | 1148.288 |
| 1148.32  | 12.98    | 1148.273 | 13.48451 | 1148.293 | 13.27374 | 1148.247 | 13.46    | 1148.289 |
| 1148.321 | 12.98377 | 1148.274 | 13.49    | 1148.294 | 13.28    | 1148.249 | 13.46651 | 1148.29  |

|          |          |          |          |          |          |          |          |          |
|----------|----------|----------|----------|----------|----------|----------|----------|----------|
| 1148.321 | 12.99    | 1148.275 | 13.49451 | 1148.295 | 13.28374 | 1148.25  | 13.47    | 1148.291 |
| 1148.322 | 12.99377 | 1148.276 | 13.5     | 1148.296 | 13.29    | 1148.251 | 13.47651 | 1148.292 |
| 1148.323 | 13       | 1148.278 | 13.50451 | 1148.297 | 13.29374 | 1148.252 | 13.48    | 1148.293 |
| 1148.323 | 13.00377 | 1148.278 | 13.51    | 1148.298 | 13.3     | 1148.254 | 13.48651 | 1148.294 |
| 1148.324 | 13.01    | 1148.28  | 13.51451 | 1148.299 | 13.30374 | 1148.255 | 13.49    | 1148.295 |
| 1148.325 | 13.01377 | 1148.28  | 13.52    | 1148.3   | 13.31    | 1148.256 | 13.49651 | 1148.296 |
| 1148.325 | 13.02    | 1148.282 | 13.52451 | 1148.301 | 13.31374 | 1148.257 | 13.5     | 1148.297 |
| 1148.326 | 13.02377 | 1148.282 | 13.53    | 1148.302 | 13.32    | 1148.259 | 13.50651 | 1148.298 |
| 1148.327 | 13.03    | 1148.284 | 13.53451 | 1148.302 | 13.32374 | 1148.259 | 13.51    | 1148.298 |
| 1148.327 | 13.03377 | 1148.284 | 13.54    | 1148.303 | 13.33    | 1148.261 | 13.51651 | 1148.3   |
| 1148.328 | 13.04    | 1148.286 | 13.54451 | 1148.304 | 13.33374 | 1148.262 | 13.52    | 1148.3   |
| 1148.329 | 13.04377 | 1148.286 | 13.55    | 1148.305 | 13.34    | 1148.263 | 13.52651 | 1148.301 |
| 1148.329 | 13.05    | 1148.288 | 13.55451 | 1148.306 | 13.34374 | 1148.264 | 13.53    | 1148.302 |
| 1148.33  | 13.05377 | 1148.288 | 13.56    | 1148.307 | 13.35    | 1148.266 | 13.53651 | 1148.303 |
| 1148.331 | 13.06    | 1148.289 | 13.56451 | 1148.307 | 13.35374 | 1148.266 | 13.54    | 1148.304 |
| 1148.331 | 13.06377 | 1148.29  | 13.57    | 1148.308 | 13.36    | 1148.268 | 13.54651 | 1148.305 |
| 1148.332 | 13.07    | 1148.291 | 13.57451 | 1148.309 | 13.36374 | 1148.269 | 13.55    | 1148.305 |
| 1148.333 | 13.07377 | 1148.292 | 13.58    | 1148.31  | 13.37    | 1148.27  | 13.55651 | 1148.306 |
| 1148.333 | 13.08    | 1148.293 | 13.58451 | 1148.311 | 13.37374 | 1148.271 | 13.56    | 1148.307 |
| 1148.334 | 13.08377 | 1148.294 | 13.59    | 1148.312 | 13.38    | 1148.272 | 13.56651 | 1148.308 |
| 1148.334 | 13.09    | 1148.295 | 13.59451 | 1148.312 | 13.38374 | 1148.273 | 13.57    | 1148.309 |
| 1148.335 | 13.09377 | 1148.296 | 13.6     | 1148.313 | 13.39    | 1148.274 | 13.57651 | 1148.31  |
| 1148.335 | 13.1     | 1148.297 | 13.60451 | 1148.314 | 13.39374 | 1148.275 | 13.58    | 1148.31  |
| 1148.336 | 13.10377 | 1148.298 | 13.61    | 1148.315 | 13.4     | 1148.277 | 13.58651 | 1148.311 |
| 1148.337 | 13.11    | 1148.299 | 13.61451 | 1148.315 | 13.40374 | 1148.277 | 13.59    | 1148.312 |
| 1148.337 | 13.11377 | 1148.299 | 13.62    | 1148.316 | 13.41    | 1148.279 | 13.59651 | 1148.313 |
| 1148.338 | 13.12    | 1148.3   | 13.62451 | 1148.317 | 13.41374 | 1148.279 | 13.6     | 1148.313 |
| 1148.338 | 13.12377 | 1148.301 | 13.63    | 1148.318 | 13.42    | 1148.281 | 13.60651 | 1148.314 |
| 1148.339 | 13.13    | 1148.302 | 13.63451 | 1148.318 | 13.42374 | 1148.282 | 13.61    | 1148.315 |
| 1148.34  | 13.13377 | 1148.303 | 13.64    | 1148.319 | 13.43    | 1148.283 | 13.61651 | 1148.316 |
| 1148.34  | 13.14    | 1148.304 | 13.64451 | 1148.32  | 13.43374 | 1148.284 | 13.62    | 1148.317 |
| 1148.341 | 13.14377 | 1148.304 | 13.65    | 1148.321 | 13.44    | 1148.285 | 13.62651 | 1148.317 |
| 1148.341 | 13.15    | 1148.305 | 13.65451 | 1148.321 | 13.44374 | 1148.286 | 13.63    | 1148.318 |
| 1148.342 | 13.15377 | 1148.306 | 13.66    | 1148.322 | 13.45    | 1148.287 | 13.63651 | 1148.319 |
| 1148.342 | 13.16    | 1148.307 | 13.66451 | 1148.323 | 13.45374 | 1148.288 | 13.64    | 1148.319 |
| 1148.343 | 13.16377 | 1148.308 | 13.67    | 1148.323 | 13.46    | 1148.289 | 13.64651 | 1148.32  |
| 1148.343 | 13.17    | 1148.309 | 13.67451 | 1148.324 | 13.46374 | 1148.289 | 13.65    | 1148.321 |
| 1148.344 | 13.17377 | 1148.309 | 13.68    | 1148.325 | 13.47    | 1148.291 | 13.65651 | 1148.322 |
| 1148.344 | 13.18    | 1148.31  | 13.68451 | 1148.325 | 13.47374 | 1148.291 | 13.66    | 1148.322 |
| 1148.345 | 13.18377 | 1148.311 | 13.69    | 1148.326 | 13.48    | 1148.293 | 13.66651 | 1148.323 |
| 1148.345 | 13.19    | 1148.312 | 13.69451 | 1148.327 | 13.48374 | 1148.293 | 13.67    | 1148.324 |
| 1148.346 | 13.19377 | 1148.312 | 13.7     | 1148.327 | 13.49    | 1148.294 | 13.67651 | 1148.325 |
| 1148.346 | 13.2     | 1148.313 | 13.70451 | 1148.328 | 13.49374 | 1148.295 | 13.68    | 1148.325 |
| 1148.347 | 13.20377 | 1148.314 | 13.71    | 1148.329 | 13.5     | 1148.296 | 13.68651 | 1148.326 |
| 1148.347 | 13.21    | 1148.315 | 13.71451 | 1148.329 | 13.50374 | 1148.297 | 13.69    | 1148.326 |
| 1148.348 | 13.21377 | 1148.316 | 13.72    | 1148.33  | 13.51    | 1148.298 | 13.69651 | 1148.327 |
| 1148.348 | 13.22    | 1148.316 | 13.72451 | 1148.331 | 13.51374 | 1148.299 | 13.7     | 1148.328 |



|          |          |          |          |          |          |          |          |          |
|----------|----------|----------|----------|----------|----------|----------|----------|----------|
| 1148.349 | 13.22377 | 1148.317 | 13.73    | 1148.331 | 13.52    | 1148.3   | 13.70651 | 1148.329 |
| 1148.349 | 13.23    | 1148.318 | 13.73451 | 1148.332 | 13.52374 | 1148.301 | 13.71    | 1148.329 |
| 1148.35  | 13.23377 | 1148.318 | 13.74    | 1148.333 | 13.53    | 1148.302 | 13.71651 | 1148.33  |
| 1148.35  | 13.24    | 1148.319 | 13.74451 | 1148.333 | 13.53374 | 1148.302 | 13.72    | 1148.33  |
| 1148.351 | 13.24377 | 1148.32  | 13.75    | 1148.334 | 13.54    | 1148.303 | 13.72651 | 1148.331 |
| 1148.351 | 13.25    | 1148.321 | 13.75451 | 1148.334 | 13.54374 | 1148.304 | 13.73    | 1148.332 |
| 1148.352 | 13.25377 | 1148.321 | 13.76    | 1148.335 | 13.55    | 1148.305 | 13.73651 | 1148.332 |
| 1148.352 | 13.26    | 1148.322 | 13.76451 | 1148.336 | 13.55374 | 1148.306 | 13.74    | 1148.333 |
| 1148.353 | 13.26377 | 1148.323 | 13.77    | 1148.336 | 13.56    | 1148.307 | 13.74651 | 1148.334 |
| 1148.353 | 13.27    | 1148.324 | 13.77451 | 1148.337 | 13.56374 | 1148.307 | 13.75    | 1148.334 |
| 1148.354 | 13.27377 | 1148.324 | 13.78    | 1148.337 | 13.57    | 1148.308 | 13.75651 | 1148.335 |
| 1148.354 | 13.28    | 1148.325 | 13.78451 | 1148.338 | 13.57374 | 1148.309 | 13.76    | 1148.335 |
| 1148.354 | 13.28377 | 1148.325 | 13.79    | 1148.339 | 13.58    | 1148.31  | 13.76651 | 1148.336 |
| 1148.355 | 13.29    | 1148.326 | 13.79451 | 1148.339 | 13.58374 | 1148.311 | 13.77    | 1148.337 |
| 1148.355 | 13.29377 | 1148.327 | 13.8     | 1148.34  | 13.59    | 1148.312 | 13.77651 | 1148.337 |
| 1148.356 | 13.3     | 1148.328 | 13.80451 | 1148.34  | 13.59374 | 1148.312 | 13.78    | 1148.338 |
| 1148.356 | 13.30377 | 1148.328 | 13.81    | 1148.341 | 13.6     | 1148.313 | 13.78651 | 1148.338 |
| 1148.357 | 13.31    | 1148.329 | 13.81451 | 1148.341 | 13.60374 | 1148.314 | 13.79    | 1148.339 |
| 1148.357 | 13.31377 | 1148.329 | 13.82    | 1148.342 | 13.61    | 1148.315 | 13.79651 | 1148.34  |
| 1148.357 | 13.32    | 1148.33  | 13.82451 | 1148.342 | 13.61374 | 1148.315 | 13.8     | 1148.34  |
| 1148.358 | 13.32377 | 1148.331 | 13.83    | 1148.343 | 13.62    | 1148.316 | 13.80651 | 1148.341 |
| 1148.358 | 13.33    | 1148.331 | 13.83451 | 1148.343 | 13.62374 | 1148.317 | 13.81    | 1148.341 |
| 1148.359 | 13.33377 | 1148.332 | 13.84    | 1148.344 | 13.63    | 1148.318 | 13.81651 | 1148.342 |
| 1148.359 | 13.34    | 1148.333 | 13.84451 | 1148.344 | 13.63374 | 1148.318 | 13.82    | 1148.342 |
| 1148.359 | 13.34377 | 1148.333 | 13.85    | 1148.345 | 13.64    | 1148.319 | 13.82651 | 1148.343 |
| 1148.36  | 13.35    | 1148.334 | 13.85451 | 1148.346 | 13.64374 | 1148.32  | 13.83    | 1148.343 |
| 1148.36  | 13.35377 | 1148.334 | 13.86    | 1148.346 | 13.65    | 1148.321 | 13.83651 | 1148.344 |
| 1148.361 | 13.36    | 1148.335 | 13.86451 | 1148.347 | 13.65374 | 1148.321 | 13.84    | 1148.344 |
| 1148.361 | 13.36377 | 1148.336 | 13.87    | 1148.347 | 13.66    | 1148.322 | 13.84651 | 1148.345 |
| 1148.361 | 13.37    | 1148.336 | 13.87451 | 1148.348 | 13.66374 | 1148.323 | 13.85    | 1148.345 |
| 1148.362 | 13.37377 | 1148.337 | 13.88    | 1148.348 | 13.67    | 1148.323 | 13.85651 | 1148.346 |
| 1148.362 | 13.38    | 1148.337 | 13.88451 | 1148.349 | 13.67374 | 1148.324 | 13.86    | 1148.346 |
| 1148.363 | 13.38377 | 1148.338 | 13.89    | 1148.349 | 13.68    | 1148.325 | 13.86651 | 1148.347 |
| 1148.363 | 13.39    | 1148.339 | 13.89451 | 1148.349 | 13.68374 | 1148.325 | 13.87    | 1148.347 |
| 1148.363 | 13.39377 | 1148.339 | 13.9     | 1148.35  | 13.69    | 1148.326 | 13.87651 | 1148.348 |
| 1148.364 | 13.4     | 1148.34  | 13.90451 | 1148.35  | 13.69374 | 1148.327 | 13.88    | 1148.348 |
| 1148.364 | 13.40377 | 1148.34  | 13.91    | 1148.351 | 13.7     | 1148.327 | 13.88651 | 1148.349 |
| 1148.364 | 13.41    | 1148.341 | 13.91451 | 1148.351 | 13.70374 | 1148.328 | 13.89    | 1148.349 |
| 1148.365 | 13.41377 | 1148.341 | 13.92    | 1148.352 | 13.71    | 1148.329 | 13.89651 | 1148.35  |
| 1148.365 | 13.42    | 1148.342 | 13.92451 | 1148.352 | 13.71374 | 1148.329 | 13.9     | 1148.35  |
| 1148.365 | 13.42377 | 1148.342 | 13.93    | 1148.353 | 13.72    | 1148.33  | 13.90651 | 1148.351 |
| 1148.366 | 13.43    | 1148.343 | 13.93451 | 1148.353 | 13.72374 | 1148.331 | 13.91    | 1148.351 |
| 1148.366 | 13.43377 | 1148.343 | 13.94    | 1148.354 | 13.73    | 1148.331 | 13.91651 | 1148.352 |
| 1148.366 | 13.44    | 1148.344 | 13.94451 | 1148.354 | 13.73374 | 1148.332 | 13.92    | 1148.352 |
| 1148.367 | 13.44377 | 1148.344 | 13.95    | 1148.355 | 13.74    | 1148.333 | 13.92651 | 1148.353 |
| 1148.367 | 13.45    | 1148.345 | 13.95451 | 1148.355 | 13.74374 | 1148.333 | 13.93    | 1148.353 |
| 1148.367 | 13.45377 | 1148.345 | 13.96    | 1148.355 | 13.75    | 1148.334 | 13.93651 | 1148.354 |

|          |          |          |          |          |          |          |          |          |
|----------|----------|----------|----------|----------|----------|----------|----------|----------|
| 1148.368 | 13.46    | 1148.346 | 13.96451 | 1148.356 | 13.75374 | 1148.334 | 13.94    | 1148.354 |
| 1148.368 | 13.46377 | 1148.346 | 13.97    | 1148.356 | 13.76    | 1148.335 | 13.94651 | 1148.355 |
| 1148.368 | 13.47    | 1148.347 | 13.97451 | 1148.357 | 13.76374 | 1148.335 | 13.95    | 1148.355 |
| 1148.369 | 13.47377 | 1148.347 | 13.98    | 1148.357 | 13.77    | 1148.336 | 13.95651 | 1148.355 |
| 1148.369 | 13.48    | 1148.348 | 13.98451 | 1148.357 | 13.77374 | 1148.337 | 13.96    | 1148.356 |
| 1148.369 | 13.48377 | 1148.348 | 13.99    | 1148.358 | 13.78    | 1148.337 | 13.96651 | 1148.356 |
| 1148.369 | 13.49    | 1148.349 | 13.99451 | 1148.358 | 13.78374 | 1148.338 | 13.97    | 1148.357 |
| 1148.37  | 13.49377 | 1148.349 | 14       | 1148.359 | 13.79    | 1148.339 | 13.97651 | 1148.357 |
| 1148.37  | 13.5     | 1148.35  | 14.00451 | 1148.359 | 13.79374 | 1148.339 | 13.98    | 1148.357 |
| 1148.37  | 13.50377 | 1148.35  | 14.01    | 1148.36  | 13.8     | 1148.34  | 13.98651 | 1148.358 |
| 1148.371 | 13.51    | 1148.351 | 14.01451 | 1148.36  | 13.80374 | 1148.34  | 13.99    | 1148.358 |
| 1148.371 | 13.51377 | 1148.351 | 14.02    | 1148.36  | 13.81    | 1148.341 | 13.99651 | 1148.359 |
| 1148.371 | 13.52    | 1148.352 | 14.02451 | 1148.361 | 13.81374 | 1148.341 | 14       | 1148.359 |
| 1148.372 | 13.52377 | 1148.352 | 14.03    | 1148.361 | 13.82    | 1148.342 | 14.00651 | 1148.36  |
| 1148.372 | 13.53    | 1148.353 | 14.03451 | 1148.361 | 13.82374 | 1148.342 | 14.01    | 1148.36  |
| 1148.372 | 13.53377 | 1148.353 | 14.04    | 1148.362 | 13.83    | 1148.343 | 14.01651 | 1148.36  |
| 1148.372 | 13.54    | 1148.354 | 14.04451 | 1148.362 | 13.83374 | 1148.343 | 14.02    | 1148.361 |
| 1148.373 | 13.54377 | 1148.354 | 14.05    | 1148.363 | 13.84    | 1148.344 | 14.02651 | 1148.361 |
| 1148.373 | 13.55    | 1148.355 | 14.05451 | 1148.363 | 13.84374 | 1148.344 | 14.03    | 1148.361 |
| 1148.373 | 13.55377 | 1148.355 | 14.06    | 1148.363 | 13.85    | 1148.345 | 14.03651 | 1148.362 |
| 1148.374 | 13.56    | 1148.355 | 14.06451 | 1148.364 | 13.85374 | 1148.345 | 14.04    | 1148.362 |
| 1148.374 | 13.56377 | 1148.356 | 14.07    | 1148.364 | 13.86    | 1148.346 | 14.04651 | 1148.363 |
| 1148.374 | 13.57    | 1148.356 | 14.07451 | 1148.364 | 13.86374 | 1148.346 | 14.05    | 1148.363 |
| 1148.374 | 13.57377 | 1148.357 | 14.08    | 1148.365 | 13.87    | 1148.347 | 14.05651 | 1148.363 |
| 1148.375 | 13.58    | 1148.357 | 14.08451 | 1148.365 | 13.87374 | 1148.347 | 14.06    | 1148.364 |
| 1148.375 | 13.58377 | 1148.357 | 14.09    | 1148.365 | 13.88    | 1148.348 | 14.06651 | 1148.364 |
| 1148.375 | 13.59    | 1148.358 | 14.09451 | 1148.366 | 13.88374 | 1148.348 | 14.07    | 1148.364 |
| 1148.375 | 13.59377 | 1148.358 | 14.1     | 1148.366 | 13.89    | 1148.349 | 14.07651 | 1148.365 |
| 1148.376 | 13.6     | 1148.359 | 14.10451 | 1148.366 | 13.89374 | 1148.349 | 14.08    | 1148.365 |
| 1148.376 | 13.60377 | 1148.359 | 14.11    | 1148.367 | 13.9     | 1148.35  | 14.08651 | 1148.365 |
| 1148.376 | 13.61    | 1148.36  | 14.11451 | 1148.367 | 13.90374 | 1148.35  | 14.09    | 1148.366 |
| 1148.376 | 13.61377 | 1148.36  | 14.12    | 1148.367 | 13.91    | 1148.351 | 14.09651 | 1148.366 |
| 1148.377 | 13.62    | 1148.36  | 14.12451 | 1148.368 | 13.91374 | 1148.351 | 14.1     | 1148.366 |
| 1148.377 | 13.62377 | 1148.361 | 14.13    | 1148.368 | 13.92    | 1148.352 | 14.10651 | 1148.367 |
| 1148.377 | 13.63    | 1148.361 | 14.13451 | 1148.368 | 13.92374 | 1148.352 | 14.11    | 1148.367 |
| 1148.377 | 13.63377 | 1148.361 | 14.14    | 1148.369 | 13.93    | 1148.353 | 14.11651 | 1148.367 |
| 1148.378 | 13.64    | 1148.362 | 14.14451 | 1148.369 | 13.93374 | 1148.353 | 14.12    | 1148.368 |
| 1148.378 | 13.64377 | 1148.362 | 14.15    | 1148.369 | 13.94    | 1148.354 | 14.12651 | 1148.368 |
| 1148.378 | 13.65    | 1148.363 | 14.15451 | 1148.37  | 13.94374 | 1148.354 | 14.13    | 1148.368 |
| 1148.378 | 13.65377 | 1148.363 | 14.16    | 1148.37  | 13.95    | 1148.355 | 14.13651 | 1148.369 |
| 1148.379 | 13.66    | 1148.363 | 14.16451 | 1148.37  | 13.95374 | 1148.355 | 14.14    | 1148.369 |
| 1148.379 | 13.66377 | 1148.364 | 14.17    | 1148.371 | 13.96    | 1148.355 | 14.14651 | 1148.369 |
| 1148.379 | 13.67    | 1148.364 | 14.17451 | 1148.371 | 13.96374 | 1148.356 | 14.15    | 1148.37  |
| 1148.379 | 13.67377 | 1148.364 | 14.18    | 1148.371 | 13.97    | 1148.356 | 14.15651 | 1148.37  |
| 1148.379 | 13.68    | 1148.365 | 14.18451 | 1148.371 | 13.97374 | 1148.357 | 14.16    | 1148.37  |
| 1148.38  | 13.68377 | 1148.365 | 14.19    | 1148.372 | 13.98    | 1148.357 | 14.16651 | 1148.371 |
| 1148.38  | 13.69    | 1148.365 | 14.19451 | 1148.372 | 13.98374 | 1148.357 | 14.17    | 1148.371 |

|          |          |          |          |          |          |          |          |          |
|----------|----------|----------|----------|----------|----------|----------|----------|----------|
| 1148.38  | 13.69377 | 1148.366 | 14.2     | 1148.372 | 13.99    | 1148.358 | 14.17651 | 1148.371 |
| 1148.38  | 13.7     | 1148.366 | 14.20451 | 1148.373 | 13.99374 | 1148.358 | 14.18    | 1148.371 |
| 1148.381 | 13.70377 | 1148.366 | 14.21    | 1148.373 | 14       | 1148.359 | 14.18651 | 1148.372 |
| 1148.381 | 13.71    | 1148.367 | 14.21451 | 1148.373 | 14.00374 | 1148.359 | 14.19    | 1148.372 |
| 1148.381 | 13.71377 | 1148.367 | 14.22    | 1148.373 | 14.01    | 1148.359 | 14.19651 | 1148.372 |
| 1148.381 | 13.72    | 1148.367 | 14.22451 | 1148.374 | 14.01374 | 1148.36  | 14.2     | 1148.372 |
| 1148.381 | 13.72377 | 1148.368 | 14.23    | 1148.374 | 14.02    | 1148.36  | 14.20651 | 1148.373 |
| 1148.381 | 13.73    | 1148.368 | 14.23451 | 1148.374 | 14.02374 | 1148.361 | 14.21    | 1148.373 |
| 1148.382 | 13.73377 | 1148.368 | 14.24    | 1148.374 | 14.03    | 1148.361 | 14.21651 | 1148.373 |
| 1148.382 | 13.74    | 1148.369 | 14.24451 | 1148.375 | 14.03374 | 1148.361 | 14.22    | 1148.374 |
| 1148.382 | 13.74377 | 1148.369 | 14.25    | 1148.375 | 14.04    | 1148.362 | 14.22651 | 1148.374 |
| 1148.382 | 13.75    | 1148.369 | 14.25451 | 1148.375 | 14.04374 | 1148.362 | 14.23    | 1148.374 |
| 1148.383 | 13.75377 | 1148.37  | 14.26    | 1148.375 | 14.05    | 1148.363 | 14.23651 | 1148.374 |
| 1148.383 | 13.76    | 1148.37  | 14.26451 | 1148.376 | 14.05374 | 1148.363 | 14.24    | 1148.375 |
| 1148.383 | 13.76377 | 1148.37  | 14.27    | 1148.376 | 14.06    | 1148.363 | 14.24651 | 1148.375 |
| 1148.383 | 13.77    | 1148.37  | 14.27451 | 1148.376 | 14.06374 | 1148.364 | 14.25    | 1148.375 |
| 1148.383 | 13.77377 | 1148.371 | 14.28    | 1148.376 | 14.07    | 1148.364 | 14.25651 | 1148.375 |
| 1148.383 | 13.78    | 1148.371 | 14.28451 | 1148.377 | 14.07374 | 1148.364 | 14.26    | 1148.376 |
| 1148.384 | 13.78377 | 1148.371 | 14.29    | 1148.377 | 14.08    | 1148.365 | 14.26651 | 1148.376 |
| 1148.384 | 13.79    | 1148.372 | 14.29451 | 1148.377 | 14.08374 | 1148.365 | 14.27    | 1148.376 |
| 1148.384 | 13.79377 | 1148.372 | 14.3     | 1148.377 | 14.09    | 1148.365 | 14.27651 | 1148.376 |
| 1148.384 | 13.8     | 1148.372 | 14.30451 | 1148.378 | 14.09374 | 1148.366 | 14.28    | 1148.377 |
| 1148.384 | 13.80377 | 1148.372 | 14.31    | 1148.378 | 14.1     | 1148.366 | 14.28651 | 1148.377 |
| 1148.384 | 13.81    | 1148.373 | 14.31451 | 1148.378 | 14.10374 | 1148.366 | 14.29    | 1148.377 |
| 1148.385 | 13.81377 | 1148.373 | 14.32    | 1148.378 | 14.11    | 1148.367 | 14.29651 | 1148.377 |
| 1148.385 | 13.82    | 1148.373 | 14.32451 | 1148.379 | 14.11374 | 1148.367 | 14.3     | 1148.378 |
| 1148.385 | 13.82377 | 1148.374 | 14.33    | 1148.379 | 14.12    | 1148.367 | 14.30651 | 1148.378 |
| 1148.385 | 13.83    | 1148.374 | 14.33451 | 1148.379 | 14.12374 | 1148.368 | 14.31    | 1148.378 |
| 1148.385 | 13.83377 | 1148.374 | 14.34    | 1148.379 | 14.13    | 1148.368 | 14.31651 | 1148.378 |
| 1148.385 | 13.84    | 1148.374 | 14.34451 | 1148.379 | 14.13374 | 1148.368 | 14.32    | 1148.379 |
| 1148.386 | 13.84377 | 1148.375 | 14.35    | 1148.38  | 14.14    | 1148.369 | 14.32651 | 1148.379 |
| 1148.386 | 13.85    | 1148.375 | 14.35451 | 1148.38  | 14.14374 | 1148.369 | 14.33    | 1148.379 |
| 1148.386 | 13.85377 | 1148.375 | 14.36    | 1148.38  | 14.15    | 1148.369 | 14.33651 | 1148.379 |
| 1148.386 | 13.86    | 1148.375 | 14.36451 | 1148.38  | 14.15374 | 1148.37  | 14.34    | 1148.379 |
| 1148.386 | 13.86377 | 1148.376 | 14.37    | 1148.381 | 14.16    | 1148.37  | 14.34651 | 1148.38  |
| 1148.386 | 13.87    | 1148.376 | 14.37451 | 1148.381 | 14.16374 | 1148.37  | 14.35    | 1148.38  |
| 1148.387 | 13.87377 | 1148.376 | 14.38    | 1148.381 | 14.17    | 1148.37  | 14.35651 | 1148.38  |
| 1148.387 | 13.88    | 1148.376 | 14.38451 | 1148.381 | 14.17374 | 1148.371 | 14.36    | 1148.38  |
| 1148.387 | 13.88377 | 1148.377 | 14.39    | 1148.381 | 14.18    | 1148.371 | 14.36651 | 1148.381 |
| 1148.387 | 13.89    | 1148.377 | 14.39451 | 1148.382 | 14.18374 | 1148.371 | 14.37    | 1148.381 |
| 1148.387 | 13.89377 | 1148.377 | 14.4     | 1148.382 | 14.19    | 1148.372 | 14.37651 | 1148.381 |
| 1148.387 | 13.9     | 1148.377 | 14.40451 | 1148.382 | 14.19374 | 1148.372 | 14.38    | 1148.381 |
| 1148.388 | 13.90377 | 1148.378 | 14.41    | 1148.382 | 14.2     | 1148.372 | 14.38651 | 1148.381 |
| 1148.388 | 13.91    | 1148.378 | 14.41451 | 1148.382 | 14.20374 | 1148.372 | 14.39    | 1148.382 |
| 1148.388 | 13.91377 | 1148.378 | 14.42    | 1148.383 | 14.21    | 1148.373 | 14.39651 | 1148.382 |
| 1148.388 | 13.92    | 1148.378 | 14.42451 | 1148.383 | 14.21374 | 1148.373 | 14.4     | 1148.382 |
| 1148.388 | 13.92377 | 1148.379 | 14.43    | 1148.383 | 14.22    | 1148.373 | 14.40651 | 1148.382 |

|          |          |          |          |          |          |          |          |          |
|----------|----------|----------|----------|----------|----------|----------|----------|----------|
| 1148.388 | 13.93    | 1148.379 | 14.43451 | 1148.383 | 14.22374 | 1148.374 | 14.41    | 1148.382 |
| 1148.388 | 13.93377 | 1148.379 | 14.44    | 1148.383 | 14.23    | 1148.374 | 14.41651 | 1148.383 |
| 1148.388 | 13.94    | 1148.379 | 14.44451 | 1148.383 | 14.23374 | 1148.374 | 14.42    | 1148.383 |
| 1148.389 | 13.94377 | 1148.379 | 14.45    | 1148.384 | 14.24    | 1148.374 | 14.42651 | 1148.383 |
| 1148.389 | 13.95    | 1148.38  | 14.45451 | 1148.384 | 14.24374 | 1148.375 | 14.43    | 1148.383 |
| 1148.389 | 13.95377 | 1148.38  | 14.46    | 1148.384 | 14.25    | 1148.375 | 14.43651 | 1148.383 |
| 1148.389 | 13.96    | 1148.38  | 14.46451 | 1148.384 | 14.25374 | 1148.375 | 14.44    | 1148.383 |
| 1148.389 | 13.96377 | 1148.38  | 14.47    | 1148.384 | 14.26    | 1148.375 | 14.44651 | 1148.384 |
| 1148.389 | 13.97    | 1148.381 | 14.47451 | 1148.385 | 14.26374 | 1148.376 | 14.45    | 1148.384 |
| 1148.389 | 13.97377 | 1148.381 | 14.48    | 1148.385 | 14.27    | 1148.376 | 14.45651 | 1148.384 |
| 1148.39  | 13.98    | 1148.381 | 14.48451 | 1148.385 | 14.27374 | 1148.376 | 14.46    | 1148.384 |
| 1148.39  | 13.98377 | 1148.381 | 14.49    | 1148.385 | 14.28    | 1148.376 | 14.46651 | 1148.384 |
| 1148.39  | 13.99    | 1148.381 | 14.49451 | 1148.385 | 14.28374 | 1148.377 | 14.47    | 1148.385 |
| 1148.39  | 13.99377 | 1148.381 | 14.5     | 1148.385 | 14.29    | 1148.377 | 14.47651 | 1148.385 |
| 1148.39  | 14       | 1148.382 | 14.50451 | 1148.386 | 14.29374 | 1148.377 | 14.48    | 1148.385 |
| 1148.39  | 14.00377 | 1148.382 | 14.51    | 1148.386 | 14.3     | 1148.377 | 14.48651 | 1148.385 |
| 1148.39  | 14.01    | 1148.382 | 14.51451 | 1148.386 | 14.30374 | 1148.378 | 14.49    | 1148.385 |
| 1148.39  | 14.01377 | 1148.382 | 14.52    | 1148.386 | 14.31    | 1148.378 | 14.49651 | 1148.385 |
| 1148.391 | 14.02    | 1148.383 | 14.52451 | 1148.386 | 14.31374 | 1148.378 | 14.5     | 1148.386 |
| 1148.391 | 14.02377 | 1148.383 | 14.53    | 1148.386 | 14.32    | 1148.378 | 14.50651 | 1148.386 |
| 1148.391 | 14.03    | 1148.383 | 14.53451 | 1148.386 | 14.32374 | 1148.379 | 14.51    | 1148.386 |
| 1148.391 | 14.03377 | 1148.383 | 14.54    | 1148.387 | 14.33    | 1148.379 | 14.51651 | 1148.386 |
| 1148.391 | 14.04    | 1148.383 | 14.54451 | 1148.387 | 14.33374 | 1148.379 | 14.52    | 1148.386 |
| 1148.391 | 14.04377 | 1148.383 | 14.55    | 1148.387 | 14.34    | 1148.379 | 14.52651 | 1148.386 |
| 1148.391 | 14.05    | 1148.384 | 14.55451 | 1148.387 | 14.34374 | 1148.379 | 14.53    | 1148.386 |
| 1148.391 | 14.05377 | 1148.384 | 14.56    | 1148.387 | 14.35    | 1148.38  | 14.53651 | 1148.387 |
| 1148.391 | 14.06    | 1148.384 | 14.56451 | 1148.387 | 14.35374 | 1148.38  | 14.54    | 1148.387 |
| 1148.392 | 14.06377 | 1148.384 | 14.57    | 1148.388 | 14.36    | 1148.38  | 14.54651 | 1148.387 |
| 1148.392 | 14.07    | 1148.384 | 14.57451 | 1148.388 | 14.36374 | 1148.38  | 14.55    | 1148.387 |
| 1148.392 | 14.07377 | 1148.384 | 14.58    | 1148.388 | 14.37    | 1148.381 | 14.55651 | 1148.387 |
| 1148.392 | 14.08    | 1148.385 | 14.58451 | 1148.388 | 14.37374 | 1148.381 | 14.56    | 1148.387 |
| 1148.392 | 14.08377 | 1148.385 | 14.59    | 1148.388 | 14.38    | 1148.381 | 14.56651 | 1148.388 |
| 1148.392 | 14.09    | 1148.385 | 14.59451 | 1148.388 | 14.38374 | 1148.381 | 14.57    | 1148.388 |
| 1148.392 | 14.09377 | 1148.385 | 14.6     | 1148.388 | 14.39    | 1148.381 | 14.57651 | 1148.388 |
| 1148.392 | 14.1     | 1148.385 | 14.60451 | 1148.389 | 14.39374 | 1148.381 | 14.58    | 1148.388 |
| 1148.392 | 14.10377 | 1148.385 | 14.61    | 1148.389 | 14.4     | 1148.382 | 14.58651 | 1148.388 |
| 1148.392 | 14.11    | 1148.386 | 14.61451 | 1148.389 | 14.40374 | 1148.382 | 14.59    | 1148.388 |
| 1148.393 | 14.11377 | 1148.386 | 14.62    | 1148.389 | 14.41    | 1148.382 | 14.59651 | 1148.388 |
| 1148.393 | 14.12    | 1148.386 | 14.62451 | 1148.389 | 14.41374 | 1148.382 | 14.6     | 1148.389 |
| 1148.393 | 14.12377 | 1148.386 | 14.63    | 1148.389 | 14.42    | 1148.383 | 14.60651 | 1148.389 |
| 1148.393 | 14.13    | 1148.386 | 14.63451 | 1148.389 | 14.42374 | 1148.383 | 14.61    | 1148.389 |
| 1148.393 | 14.13377 | 1148.386 | 14.64    | 1148.389 | 14.43    | 1148.383 | 14.61651 | 1148.389 |
| 1148.393 | 14.14    | 1148.387 | 14.64451 | 1148.39  | 14.43374 | 1148.383 | 14.62    | 1148.389 |
| 1148.393 | 14.14377 | 1148.387 | 14.65    | 1148.39  | 14.44    | 1148.383 | 14.62651 | 1148.389 |
| 1148.393 | 14.15    | 1148.387 | 14.65451 | 1148.39  | 14.44374 | 1148.383 | 14.63    | 1148.389 |
| 1148.393 | 14.15377 | 1148.387 | 14.66    | 1148.39  | 14.45    | 1148.384 | 14.63651 | 1148.389 |
| 1148.393 | 14.16    | 1148.387 | 14.66451 | 1148.39  | 14.45374 | 1148.384 | 14.64    | 1148.39  |

|          |          |          |          |          |          |          |          |          |
|----------|----------|----------|----------|----------|----------|----------|----------|----------|
| 1148.394 | 14.16377 | 1148.387 | 14.67    | 1148.39  | 14.46    | 1148.384 | 14.64651 | 1148.39  |
| 1148.394 | 14.17    | 1148.388 | 14.67451 | 1148.39  | 14.46374 | 1148.384 | 14.65    | 1148.39  |
| 1148.394 | 14.17377 | 1148.388 | 14.68    | 1148.39  | 14.47    | 1148.384 | 14.65651 | 1148.39  |
| 1148.394 | 14.18    | 1148.388 | 14.68451 | 1148.391 | 14.47374 | 1148.384 | 14.66    | 1148.39  |
| 1148.394 | 14.18377 | 1148.388 | 14.69    | 1148.391 | 14.48    | 1148.385 | 14.66651 | 1148.39  |
| 1148.394 | 14.19    | 1148.388 | 14.69451 | 1148.391 | 14.48374 | 1148.385 | 14.67    | 1148.39  |
| 1148.394 | 14.19377 | 1148.388 | 14.7     | 1148.391 | 14.49    | 1148.385 | 14.67651 | 1148.39  |
| 1148.394 | 14.2     | 1148.388 | 14.70451 | 1148.391 | 14.49374 | 1148.385 | 14.68    | 1148.391 |
| 1148.394 | 14.20377 | 1148.388 | 14.71    | 1148.391 | 14.5     | 1148.385 | 14.68651 | 1148.391 |
| 1148.394 | 14.21    | 1148.389 | 14.71451 | 1148.391 | 14.50374 | 1148.385 | 14.69    | 1148.391 |
| 1148.394 | 14.21377 | 1148.389 | 14.72    | 1148.391 | 14.51    | 1148.386 | 14.69651 | 1148.391 |
| 1148.394 | 14.22    | 1148.389 | 14.72451 | 1148.391 | 14.51374 | 1148.386 | 14.7     | 1148.391 |
| 1148.395 | 14.22377 | 1148.389 | 14.73    | 1148.392 | 14.52    | 1148.386 | 14.70651 | 1148.391 |
| 1148.395 | 14.23    | 1148.389 | 14.73451 | 1148.392 | 14.52374 | 1148.386 | 14.71    | 1148.391 |
| 1148.395 | 14.23377 | 1148.389 | 14.74    | 1148.392 | 14.53    | 1148.386 | 14.71651 | 1148.391 |
| 1148.395 | 14.24    | 1148.389 | 14.74451 | 1148.392 | 14.53374 | 1148.386 | 14.72    | 1148.391 |
| 1148.395 | 14.24377 | 1148.39  | 14.75    | 1148.392 | 14.54    | 1148.387 | 14.72651 | 1148.392 |
| 1148.395 | 14.25    | 1148.39  | 14.75451 | 1148.392 | 14.54374 | 1148.387 | 14.73    | 1148.392 |
| 1148.395 | 14.25377 | 1148.39  | 14.76    | 1148.392 | 14.55    | 1148.387 | 14.73651 | 1148.392 |
| 1148.395 | 14.26    | 1148.39  | 14.76451 | 1148.392 | 14.55374 | 1148.387 | 14.74    | 1148.392 |
| 1148.395 | 14.26377 | 1148.39  | 14.77    | 1148.392 | 14.56    | 1148.387 | 14.74651 | 1148.392 |
| 1148.395 | 14.27    | 1148.39  | 14.77451 | 1148.392 | 14.56374 | 1148.387 | 14.75    | 1148.392 |
| 1148.395 | 14.27377 | 1148.39  | 14.78    | 1148.393 | 14.57    | 1148.388 | 14.75651 | 1148.392 |
| 1148.395 | 14.28    | 1148.39  | 14.78451 | 1148.393 | 14.57374 | 1148.388 | 14.76    | 1148.392 |
| 1148.395 | 14.28377 | 1148.39  | 14.79    | 1148.393 | 14.58    | 1148.388 | 14.76651 | 1148.392 |
| 1148.395 | 14.29    | 1148.391 | 14.79451 | 1148.393 | 14.58374 | 1148.388 | 14.77    | 1148.392 |
| 1148.396 | 14.29377 | 1148.391 | 14.8     | 1148.393 | 14.59    | 1148.388 | 14.77651 | 1148.393 |
| 1148.396 | 14.3     | 1148.391 | 14.80451 | 1148.393 | 14.59374 | 1148.388 | 14.78    | 1148.393 |
| 1148.396 | 14.30377 | 1148.391 | 14.81    | 1148.393 | 14.6     | 1148.388 | 14.78651 | 1148.393 |
| 1148.396 | 14.31    | 1148.391 | 14.81451 | 1148.393 | 14.60374 | 1148.388 | 14.79    | 1148.393 |
| 1148.396 | 14.31377 | 1148.391 | 14.82    | 1148.393 | 14.61    | 1148.389 | 14.79651 | 1148.393 |
| 1148.396 | 14.32    | 1148.391 | 14.82451 | 1148.393 | 14.61374 | 1148.389 | 14.8     | 1148.393 |
| 1148.396 | 14.32377 | 1148.391 | 14.83    | 1148.394 | 14.62    | 1148.389 | 14.80651 | 1148.393 |
| 1148.396 | 14.33    | 1148.392 | 14.83451 | 1148.394 | 14.62374 | 1148.389 | 14.81    | 1148.393 |
| 1148.396 | 14.33377 | 1148.392 | 14.84    | 1148.394 | 14.63    | 1148.389 | 14.81651 | 1148.393 |
| 1148.396 | 14.34    | 1148.392 | 14.84451 | 1148.394 | 14.63374 | 1148.389 | 14.82    | 1148.393 |
| 1148.396 | 14.34377 | 1148.392 | 14.85    | 1148.394 | 14.64    | 1148.389 | 14.82651 | 1148.394 |
| 1148.396 | 14.35    | 1148.392 | 14.85451 | 1148.394 | 14.64374 | 1148.39  | 14.83    | 1148.394 |
| 1148.396 | 14.35377 | 1148.392 | 14.86    | 1148.394 | 14.65    | 1148.39  | 14.83651 | 1148.394 |
| 1148.396 | 14.36    | 1148.392 | 14.86451 | 1148.394 | 14.65374 | 1148.39  | 14.84    | 1148.394 |
| 1148.397 | 14.36377 | 1148.392 | 14.87    | 1148.394 | 14.66    | 1148.39  | 14.84651 | 1148.394 |
| 1148.397 | 14.37    | 1148.392 | 14.87451 | 1148.394 | 14.66374 | 1148.39  | 14.85    | 1148.394 |
| 1148.397 | 14.37377 | 1148.392 | 14.88    | 1148.394 | 14.67    | 1148.39  | 14.85651 | 1148.394 |
| 1148.397 | 14.38    | 1148.393 | 14.88451 | 1148.394 | 14.67374 | 1148.39  | 14.86    | 1148.394 |
| 1148.397 | 14.38377 | 1148.393 | 14.89    | 1148.395 | 14.68    | 1148.39  | 14.86651 | 1148.394 |
| 1148.397 | 14.39    | 1148.393 | 14.89451 | 1148.395 | 14.68374 | 1148.39  | 14.87    | 1148.394 |
| 1148.397 | 14.39377 | 1148.393 | 14.9     | 1148.395 | 14.69    | 1148.391 | 14.87651 | 1148.394 |

|          |          |          |          |          |          |          |          |          |
|----------|----------|----------|----------|----------|----------|----------|----------|----------|
| 1148.397 | 14.4     | 1148.393 | 14.90451 | 1148.395 | 14.69374 | 1148.391 | 14.88    | 1148.394 |
| 1148.397 | 14.40377 | 1148.393 | 14.91    | 1148.395 | 14.7     | 1148.391 | 14.88651 | 1148.395 |
| 1148.397 | 14.41    | 1148.393 | 14.91451 | 1148.395 | 14.70374 | 1148.391 | 14.89    | 1148.395 |
| 1148.397 | 14.41377 | 1148.393 | 14.92    | 1148.395 | 14.71    | 1148.391 | 14.89651 | 1148.395 |
| 1148.397 | 14.42    | 1148.393 | 14.92451 | 1148.395 | 14.71374 | 1148.391 | 14.9     | 1148.395 |
| 1148.397 | 14.42377 | 1148.393 | 14.93    | 1148.395 | 14.72    | 1148.391 | 14.90651 | 1148.395 |
| 1148.397 | 14.43    | 1148.393 | 14.93451 | 1148.395 | 14.72374 | 1148.391 | 14.91    | 1148.395 |
| 1148.397 | 14.43377 | 1148.394 | 14.94    | 1148.395 | 14.73    | 1148.392 | 14.91651 | 1148.395 |
| 1148.397 | 14.44    | 1148.394 | 14.94451 | 1148.395 | 14.73374 | 1148.392 | 14.92    | 1148.395 |
| 1148.397 | 14.44377 | 1148.394 | 14.95    | 1148.395 | 14.74    | 1148.392 | 14.92651 | 1148.395 |
| 1148.397 | 14.45    | 1148.394 | 14.95451 | 1148.396 | 14.74374 | 1148.392 | 14.93    | 1148.395 |
| 1148.398 | 14.45377 | 1148.394 | 14.96    | 1148.396 | 14.75    | 1148.392 | 14.93651 | 1148.395 |
| 1148.398 | 14.46    | 1148.394 | 14.96451 | 1148.396 | 14.75374 | 1148.392 | 14.94    | 1148.395 |
| 1148.398 | 14.46377 | 1148.394 | 14.97    | 1148.396 | 14.76    | 1148.392 | 14.94651 | 1148.395 |
| 1148.398 | 14.47    | 1148.394 | 14.97451 | 1148.396 | 14.76374 | 1148.392 | 14.95    | 1148.396 |
| 1148.398 | 14.47377 | 1148.394 | 14.98    | 1148.396 | 14.77    | 1148.392 | 14.95651 | 1148.396 |
| 1148.398 | 14.48    | 1148.394 | 14.98451 | 1148.396 | 14.77374 | 1148.392 | 14.96    | 1148.396 |
| 1148.398 | 14.48377 | 1148.394 | 14.99    | 1148.396 | 14.78    | 1148.393 | 14.96651 | 1148.396 |
| 1148.398 | 14.49    | 1148.395 | 14.99451 | 1148.396 | 14.78374 | 1148.393 | 14.97    | 1148.396 |
| 1148.398 | 14.49377 | 1148.395 | 15       | 1148.396 | 14.79    | 1148.393 | 14.97651 | 1148.396 |
| 1148.398 | 14.5     | 1148.395 | 15.00451 | 1148.396 | 14.79374 | 1148.393 | 14.98    | 1148.396 |
| 1148.398 | 14.50377 | 1148.395 | 15.01    | 1148.396 | 14.8     | 1148.393 | 14.98651 | 1148.396 |
| 1148.398 | 14.51    | 1148.395 | 15.01451 | 1148.396 | 14.80374 | 1148.393 | 14.99    | 1148.396 |
| 1148.398 | 14.51377 | 1148.395 | 15.02    | 1148.396 | 14.81    | 1148.393 | 14.99651 | 1148.396 |
| 1148.398 | 14.52    | 1148.395 | 15.02451 | 1148.396 | 14.81374 | 1148.393 | 15       | 1148.396 |
| 1148.398 | 14.52377 | 1148.395 | 15.03    | 1148.397 | 14.82    | 1148.393 | 15.00651 | 1148.396 |
| 1148.398 | 14.53    | 1148.395 | 15.03451 | 1148.397 | 14.82374 | 1148.393 | 15.01    | 1148.396 |
| 1148.398 | 14.53377 | 1148.395 | 15.04    | 1148.397 | 14.83    | 1148.394 | 15.01651 | 1148.396 |
| 1148.398 | 14.54    | 1148.395 | 15.04451 | 1148.397 | 14.83374 | 1148.394 | 15.02    | 1148.396 |
| 1148.398 | 14.54377 | 1148.395 | 15.05    | 1148.397 | 14.84    | 1148.394 | 15.02651 | 1148.397 |
| 1148.398 | 14.55    | 1148.395 | 15.05451 | 1148.397 | 14.84374 | 1148.394 | 15.03    | 1148.397 |
| 1148.398 | 14.55377 | 1148.395 | 15.06    | 1148.397 | 14.85    | 1148.394 | 15.03651 | 1148.397 |
| 1148.399 | 14.56    | 1148.396 | 15.06451 | 1148.397 | 14.85374 | 1148.394 | 15.04    | 1148.397 |
| 1148.399 | 14.56377 | 1148.396 | 15.07    | 1148.397 | 14.86    | 1148.394 | 15.04651 | 1148.397 |
| 1148.399 | 14.57    | 1148.396 | 15.07451 | 1148.397 | 14.86374 | 1148.394 | 15.05    | 1148.397 |
| 1148.399 | 14.57377 | 1148.396 | 15.08    | 1148.397 | 14.87    | 1148.394 | 15.05651 | 1148.397 |
| 1148.399 | 14.58    | 1148.396 | 15.08451 | 1148.397 | 14.87374 | 1148.394 | 15.06    | 1148.397 |
| 1148.399 | 14.58377 | 1148.396 | 15.09    | 1148.397 | 14.88    | 1148.394 | 15.06651 | 1148.397 |
| 1148.399 | 14.59    | 1148.396 | 15.09451 | 1148.397 | 14.88374 | 1148.394 | 15.07    | 1148.397 |
| 1148.399 | 14.59377 | 1148.396 | 15.1     | 1148.397 | 14.89    | 1148.395 | 15.07651 | 1148.397 |
| 1148.399 | 14.6     | 1148.396 | 15.10451 | 1148.397 | 14.89374 | 1148.395 | 15.08    | 1148.397 |
| 1148.399 | 14.60377 | 1148.396 | 15.11    | 1148.397 | 14.9     | 1148.395 | 15.08651 | 1148.397 |
| 1148.399 | 14.61    | 1148.396 | 15.11451 | 1148.397 | 14.90374 | 1148.395 | 15.09    | 1148.397 |
| 1148.399 | 14.61377 | 1148.396 | 15.12    | 1148.398 | 14.91    | 1148.395 | 15.09651 | 1148.397 |
| 1148.399 | 14.62    | 1148.396 | 15.12451 | 1148.398 | 14.91374 | 1148.395 | 15.1     | 1148.397 |
| 1148.399 | 14.62377 | 1148.396 | 15.13    | 1148.398 | 14.92    | 1148.395 | 15.10651 | 1148.397 |
| 1148.399 | 14.63    | 1148.396 | 15.13451 | 1148.398 | 14.92374 | 1148.395 | 15.11    | 1148.397 |

|          |          |          |          |          |          |          |          |          |
|----------|----------|----------|----------|----------|----------|----------|----------|----------|
| 1148.399 | 14.63377 | 1148.397 | 15.14    | 1148.398 | 14.93    | 1148.395 | 15.11651 | 1148.398 |
| 1148.399 | 14.64    | 1148.397 | 15.14451 | 1148.398 | 14.93374 | 1148.395 | 15.12    | 1148.398 |
| 1148.399 | 14.64377 | 1148.397 | 15.15    | 1148.398 | 14.94    | 1148.395 | 15.12651 | 1148.398 |
| 1148.399 | 14.65    | 1148.397 | 15.15451 | 1148.398 | 14.94374 | 1148.395 | 15.13    | 1148.398 |
| 1148.399 | 14.65377 | 1148.397 | 15.16    | 1148.398 | 14.95    | 1148.395 | 15.13651 | 1148.398 |
| 1148.399 | 14.66    | 1148.397 | 15.16451 | 1148.398 | 14.95374 | 1148.395 | 15.14    | 1148.398 |
| 1148.399 | 14.66377 | 1148.397 | 15.17    | 1148.398 | 14.96    | 1148.396 | 15.14651 | 1148.398 |
| 1148.399 | 14.67    | 1148.397 | 15.17451 | 1148.398 | 14.96374 | 1148.396 | 15.15    | 1148.398 |
| 1148.399 | 14.67377 | 1148.397 | 15.18    | 1148.398 | 14.97    | 1148.396 | 15.15651 | 1148.398 |
| 1148.399 | 14.68    | 1148.397 | 15.18451 | 1148.398 | 14.97374 | 1148.396 | 15.16    | 1148.398 |
| 1148.399 | 14.68377 | 1148.397 | 15.19    | 1148.398 | 14.98    | 1148.396 | 15.16651 | 1148.398 |
| 1148.399 | 14.69    | 1148.397 | 15.19451 | 1148.398 | 14.98374 | 1148.396 | 15.17    | 1148.398 |
| 1148.4   | 14.69377 | 1148.397 | 15.2     | 1148.398 | 14.99    | 1148.396 | 15.17651 | 1148.398 |
| 1148.4   | 14.7     | 1148.397 | 15.20451 | 1148.398 | 14.99374 | 1148.396 | 15.18    | 1148.398 |
| 1148.4   | 14.70377 | 1148.397 | 15.21    | 1148.398 | 15       | 1148.396 | 15.18651 | 1148.398 |
| 1148.4   | 14.71    | 1148.397 | 15.21451 | 1148.398 | 15.00374 | 1148.396 | 15.19    | 1148.398 |
| 1148.4   | 14.71377 | 1148.397 | 15.22    | 1148.398 | 15.01    | 1148.396 | 15.19651 | 1148.398 |
| 1148.4   | 14.72    | 1148.397 | 15.22451 | 1148.399 | 15.01374 | 1148.396 | 15.2     | 1148.398 |
| 1148.4   | 14.72377 | 1148.398 | 15.23    | 1148.399 | 15.02    | 1148.396 | 15.20651 | 1148.398 |
| 1148.4   | 14.73    | 1148.398 | 15.23451 | 1148.399 | 15.02374 | 1148.396 | 15.21    | 1148.398 |
| 1148.4   | 14.73377 | 1148.398 | 15.24    | 1148.399 | 15.03    | 1148.396 | 15.21651 | 1148.398 |
| 1148.4   | 14.74    | 1148.398 | 15.24451 | 1148.399 | 15.03374 | 1148.397 | 15.22    | 1148.399 |
| 1148.4   | 14.74377 | 1148.398 | 15.25    | 1148.399 | 15.04    | 1148.397 | 15.22651 | 1148.399 |
| 1148.4   | 14.75    | 1148.398 | 15.25451 | 1148.399 | 15.04374 | 1148.397 | 15.23    | 1148.399 |
| 1148.4   | 14.75377 | 1148.398 | 15.26    | 1148.399 | 15.05    | 1148.397 | 15.23651 | 1148.399 |
| 1148.4   | 14.76    | 1148.398 | 15.26451 | 1148.399 | 15.05374 | 1148.397 | 15.24    | 1148.399 |
| 1148.4   | 14.76377 | 1148.398 | 15.27    | 1148.399 | 15.06    | 1148.397 | 15.24651 | 1148.399 |
| 1148.4   | 14.77    | 1148.398 | 15.27451 | 1148.399 | 15.06374 | 1148.397 | 15.25    | 1148.399 |
| 1148.4   | 14.77377 | 1148.398 | 15.28    | 1148.399 | 15.07    | 1148.397 | 15.25651 | 1148.399 |
| 1148.4   | 14.78    | 1148.398 | 15.28451 | 1148.399 | 15.07374 | 1148.397 | 15.26    | 1148.399 |
| 1148.4   | 14.78377 | 1148.398 | 15.29    | 1148.399 | 15.08    | 1148.397 | 15.26651 | 1148.399 |
| 1148.4   | 14.79    | 1148.398 | 15.29451 | 1148.399 | 15.08374 | 1148.397 | 15.27    | 1148.399 |
| 1148.4   | 14.79377 | 1148.398 | 15.3     | 1148.399 | 15.09    | 1148.397 | 15.27651 | 1148.399 |
| 1148.4   | 14.8     | 1148.398 | 15.30451 | 1148.399 | 15.09374 | 1148.397 | 15.28    | 1148.399 |
| 1148.4   | 14.80377 | 1148.398 | 15.31    | 1148.399 | 15.1     | 1148.397 | 15.28651 | 1148.399 |
| 1148.4   | 14.81    | 1148.398 | 15.31451 | 1148.399 | 15.10374 | 1148.397 | 15.29    | 1148.399 |
| 1148.4   | 14.81377 | 1148.398 | 15.32    | 1148.399 | 15.11    | 1148.397 | 15.29651 | 1148.399 |
| 1148.4   | 14.82    | 1148.398 | 15.32451 | 1148.399 | 15.11374 | 1148.397 | 15.3     | 1148.399 |
| 1148.4   | 14.82377 | 1148.398 | 15.33    | 1148.399 | 15.12    | 1148.398 | 15.30651 | 1148.399 |
| 1148.4   | 14.83    | 1148.399 | 15.33451 | 1148.399 | 15.12374 | 1148.398 | 15.31    | 1148.399 |
| 1148.4   | 14.83377 | 1148.399 | 15.34    | 1148.399 | 15.13    | 1148.398 | 15.31651 | 1148.399 |
| 1148.4   | 14.84    | 1148.399 | 15.34451 | 1148.399 | 15.13374 | 1148.398 | 15.32    | 1148.399 |
| 1148.4   | 14.84377 | 1148.399 | 15.35    | 1148.399 | 15.14    | 1148.398 | 15.32651 | 1148.399 |
| 1148.4   | 14.85    | 1148.399 | 15.35451 | 1148.399 | 15.14374 | 1148.398 | 15.33    | 1148.399 |
| 1148.4   | 14.85377 | 1148.399 | 15.36    | 1148.4   | 15.15    | 1148.398 | 15.33651 | 1148.399 |
| 1148.4   | 14.86    | 1148.399 | 15.36451 | 1148.4   | 15.15374 | 1148.398 | 15.34    | 1148.399 |
| 1148.4   | 14.86377 | 1148.399 | 15.37    | 1148.4   | 15.16    | 1148.398 | 15.34651 | 1148.399 |

|          |          |          |          |          |          |          |          |          |
|----------|----------|----------|----------|----------|----------|----------|----------|----------|
| 1148.4   | 14.87    | 1148.399 | 15.37451 | 1148.4   | 15.16374 | 1148.398 | 15.35    | 1148.399 |
| 1148.401 | 14.87377 | 1148.399 | 15.38    | 1148.4   | 15.17    | 1148.398 | 15.35651 | 1148.4   |
| 1148.401 | 14.88    | 1148.399 | 15.38451 | 1148.4   | 15.17374 | 1148.398 | 15.36    | 1148.4   |
| 1148.401 | 14.88377 | 1148.399 | 15.39    | 1148.4   | 15.18    | 1148.398 | 15.36651 | 1148.4   |
| 1148.401 | 14.89    | 1148.399 | 15.39451 | 1148.4   | 15.18374 | 1148.398 | 15.37    | 1148.4   |
| 1148.401 | 14.89377 | 1148.399 | 15.4     | 1148.4   | 15.19    | 1148.398 | 15.37651 | 1148.4   |
| 1148.401 | 14.9     | 1148.399 | 15.40451 | 1148.4   | 15.19374 | 1148.398 | 15.38    | 1148.4   |
| 1148.401 | 14.90377 | 1148.399 | 15.41    | 1148.4   | 15.2     | 1148.398 | 15.38651 | 1148.4   |
| 1148.401 | 14.91    | 1148.399 | 15.41451 | 1148.4   | 15.20374 | 1148.398 | 15.39    | 1148.4   |
| 1148.401 | 14.91377 | 1148.399 | 15.42    | 1148.4   | 15.21    | 1148.398 | 15.39651 | 1148.4   |
| 1148.401 | 14.92    | 1148.399 | 15.42451 | 1148.4   | 15.21374 | 1148.398 | 15.4     | 1148.4   |
| 1148.401 | 14.92377 | 1148.399 | 15.43    | 1148.4   | 15.22    | 1148.398 | 15.40651 | 1148.4   |
| 1148.401 | 14.93    | 1148.399 | 15.43451 | 1148.4   | 15.22374 | 1148.398 | 15.41    | 1148.4   |
| 1148.401 | 14.93377 | 1148.399 | 15.44    | 1148.4   | 15.23    | 1148.399 | 15.41651 | 1148.4   |
| 1148.401 | 14.94    | 1148.399 | 15.44451 | 1148.4   | 15.23374 | 1148.399 | 15.42    | 1148.4   |
| 1148.401 | 14.94377 | 1148.399 | 15.45    | 1148.4   | 15.24    | 1148.399 | 15.42651 | 1148.4   |
| 1148.401 | 14.95    | 1148.399 | 15.45451 | 1148.4   | 15.24374 | 1148.399 | 15.43    | 1148.4   |
| 1148.401 | 14.95377 | 1148.399 | 15.46    | 1148.4   | 15.25    | 1148.399 | 15.43651 | 1148.4   |
| 1148.401 | 14.96    | 1148.4   | 15.46451 | 1148.4   | 15.25374 | 1148.399 | 15.44    | 1148.4   |
| 1148.401 | 14.96377 | 1148.4   | 15.47    | 1148.4   | 15.26    | 1148.399 | 15.44651 | 1148.4   |
| 1148.401 | 14.97    | 1148.4   | 15.47451 | 1148.4   | 15.26374 | 1148.399 | 15.45    | 1148.4   |
| 1148.401 | 14.97377 | 1148.4   | 15.48    | 1148.4   | 15.27    | 1148.399 | 15.45651 | 1148.4   |
| 1148.401 | 14.98    | 1148.4   | 15.48451 | 1148.4   | 15.27374 | 1148.399 | 15.46    | 1148.4   |
| 1148.401 | 14.98377 | 1148.4   | 15.49    | 1148.4   | 15.28    | 1148.399 | 15.46651 | 1148.4   |
| 1148.401 | 14.99    | 1148.4   | 15.49451 | 1148.4   | 15.28374 | 1148.399 | 15.47    | 1148.4   |
| 1148.401 | 14.99377 | 1148.4   | 15.5     | 1148.4   | 15.29    | 1148.399 | 15.47651 | 1148.4   |
| 1148.401 | 15       | 1148.4   | 15.50451 | 1148.4   | 15.29374 | 1148.399 | 15.48    | 1148.4   |
| 1148.401 | 15.00377 | 1148.4   | 15.51    | 1148.4   | 15.3     | 1148.399 | 15.48651 | 1148.4   |
| 1148.401 | 15.01    | 1148.4   | 15.51451 | 1148.4   | 15.30374 | 1148.399 | 15.49    | 1148.4   |
| 1148.401 | 15.01377 | 1148.4   | 15.52    | 1148.4   | 15.31    | 1148.399 | 15.49651 | 1148.4   |
| 1148.401 | 15.02    | 1148.4   | 15.52451 | 1148.4   | 15.31374 | 1148.399 | 15.5     | 1148.4   |
| 1148.401 | 15.02377 | 1148.4   | 15.53    | 1148.4   | 15.32    | 1148.399 | 15.50651 | 1148.4   |
| 1148.401 | 15.03    | 1148.4   | 15.53451 | 1148.4   | 15.32374 | 1148.399 | 15.51    | 1148.4   |
| 1148.401 | 15.03377 | 1148.4   | 15.54    | 1148.401 | 15.33    | 1148.399 | 15.51651 | 1148.4   |
| 1148.401 | 15.04    | 1148.4   | 15.54451 | 1148.401 | 15.33374 | 1148.399 | 15.52    | 1148.4   |
| 1148.401 | 15.04377 | 1148.4   | 15.55    | 1148.401 | 15.34    | 1148.399 | 15.52651 | 1148.4   |
| 1148.401 | 15.05    | 1148.4   | 15.55451 | 1148.401 | 15.34374 | 1148.399 | 15.53    | 1148.401 |
| 1148.401 | 15.05377 | 1148.4   | 15.56    | 1148.401 | 15.35    | 1148.399 | 15.53651 | 1148.401 |
| 1148.401 | 15.06    | 1148.4   | 15.56451 | 1148.401 | 15.35374 | 1148.399 | 15.54    | 1148.401 |
| 1148.401 | 15.06377 | 1148.4   | 15.57    | 1148.401 | 15.36    | 1148.4   | 15.54651 | 1148.401 |
| 1148.401 | 15.07    | 1148.4   | 15.57451 | 1148.401 | 15.36374 | 1148.4   | 15.55    | 1148.401 |
| 1148.401 | 15.07377 | 1148.4   | 15.58    | 1148.401 | 15.37    | 1148.4   | 15.55651 | 1148.401 |
| 1148.401 | 15.08    | 1148.4   | 15.58451 | 1148.401 | 15.37374 | 1148.4   | 15.56    | 1148.401 |
| 1148.401 | 15.08377 | 1148.4   | 15.59    | 1148.401 | 15.38    | 1148.4   | 15.56651 | 1148.401 |
| 1148.401 | 15.09    | 1148.4   | 15.59451 | 1148.401 | 15.38374 | 1148.4   | 15.57    | 1148.401 |
| 1148.401 | 15.09377 | 1148.4   | 15.6     | 1148.401 | 15.39    | 1148.4   | 15.57651 | 1148.401 |
| 1148.401 | 15.1     | 1148.4   | 15.60451 | 1148.401 | 15.39374 | 1148.4   | 15.58    | 1148.401 |



|          |          |          |          |          |          |          |          |          |
|----------|----------|----------|----------|----------|----------|----------|----------|----------|
| 1148.401 | 15.10377 | 1148.4   | 15.61    | 1148.401 | 15.4     | 1148.4   | 15.58651 | 1148.401 |
| 1148.401 | 15.11    | 1148.4   | 15.61451 | 1148.401 | 15.40374 | 1148.4   | 15.59    | 1148.401 |
| 1148.401 | 15.11377 | 1148.4   | 15.62    | 1148.401 | 15.41    | 1148.4   | 15.59651 | 1148.401 |
| 1148.401 | 15.12    | 1148.4   | 15.62451 | 1148.401 | 15.41374 | 1148.4   | 15.6     | 1148.401 |
| 1148.401 | 15.12377 | 1148.4   | 15.63    | 1148.401 | 15.42    | 1148.4   | 15.60651 | 1148.401 |
| 1148.401 | 15.13    | 1148.4   | 15.63451 | 1148.401 | 15.42374 | 1148.4   | 15.61    | 1148.401 |
| 1148.401 | 15.13377 | 1148.4   | 15.64    | 1148.401 | 15.43    | 1148.4   | 15.61651 | 1148.401 |
| 1148.401 | 15.14    | 1148.401 | 15.64451 | 1148.401 | 15.43374 | 1148.4   | 15.62    | 1148.401 |
| 1148.402 | 15.14377 | 1148.401 | 15.65    | 1148.401 | 15.44    | 1148.4   | 15.62651 | 1148.401 |
| 1148.402 | 15.15    | 1148.401 | 15.65451 | 1148.401 | 15.44374 | 1148.4   | 15.63    | 1148.401 |
| 1148.402 | 15.15377 | 1148.401 | 15.66    | 1148.401 | 15.45    | 1148.4   | 15.63651 | 1148.401 |
| 1148.402 | 15.16    | 1148.401 | 15.66451 | 1148.401 | 15.45374 | 1148.4   | 15.64    | 1148.401 |
| 1148.402 | 15.16377 | 1148.401 | 15.67    | 1148.401 | 15.46    | 1148.4   | 15.64651 | 1148.401 |
| 1148.402 | 15.17    | 1148.401 | 15.67451 | 1148.401 | 15.46374 | 1148.4   | 15.65    | 1148.401 |
| 1148.402 | 15.17377 | 1148.401 | 15.68    | 1148.401 | 15.47    | 1148.4   | 15.65651 | 1148.401 |
| 1148.402 | 15.18    | 1148.401 | 15.68451 | 1148.401 | 15.47374 | 1148.4   | 15.66    | 1148.401 |
| 1148.402 | 15.18377 | 1148.401 | 15.69    | 1148.401 | 15.48    | 1148.4   | 15.66651 | 1148.401 |
| 1148.402 | 15.19    | 1148.401 | 15.69451 | 1148.401 | 15.48374 | 1148.4   | 15.67    | 1148.401 |
| 1148.402 | 15.19377 | 1148.401 | 15.7     | 1148.401 | 15.49    | 1148.4   | 15.67651 | 1148.401 |
| 1148.402 | 15.2     | 1148.401 | 15.70451 | 1148.401 | 15.49374 | 1148.4   | 15.68    | 1148.401 |
| 1148.402 | 15.20377 | 1148.401 | 15.71    | 1148.401 | 15.5     | 1148.4   | 15.68651 | 1148.401 |
| 1148.402 | 15.21    | 1148.401 | 15.71451 | 1148.401 | 15.50374 | 1148.4   | 15.69    | 1148.401 |
| 1148.402 | 15.21377 | 1148.401 | 15.72    | 1148.401 | 15.51    | 1148.4   | 15.69651 | 1148.401 |
| 1148.402 | 15.22    | 1148.401 | 15.72451 | 1148.401 | 15.51374 | 1148.4   | 15.7     | 1148.401 |
| 1148.402 | 15.22377 | 1148.401 | 15.73    | 1148.401 | 15.52    | 1148.4   | 15.70651 | 1148.401 |
| 1148.402 | 15.23    | 1148.401 | 15.73451 | 1148.401 | 15.52374 | 1148.4   | 15.71    | 1148.401 |
| 1148.402 | 15.23377 | 1148.401 | 15.74    | 1148.401 | 15.53    | 1148.4   | 15.71651 | 1148.401 |
| 1148.402 | 15.24    | 1148.401 | 15.74451 | 1148.401 | 15.53374 | 1148.4   | 15.72    | 1148.401 |
| 1148.402 | 15.24377 | 1148.401 | 15.75    | 1148.401 | 15.54    | 1148.401 | 15.72651 | 1148.401 |
| 1148.402 | 15.25    | 1148.401 | 15.75451 | 1148.401 | 15.54374 | 1148.401 | 15.73    | 1148.401 |
| 1148.402 | 15.25377 | 1148.401 | 15.76    | 1148.401 | 15.55    | 1148.401 | 15.73651 | 1148.401 |
| 1148.402 | 15.26    | 1148.401 | 15.76451 | 1148.401 | 15.55374 | 1148.401 | 15.74    | 1148.401 |
| 1148.402 | 15.26377 | 1148.401 | 15.77    | 1148.401 | 15.56    | 1148.401 | 15.74651 | 1148.401 |
| 1148.402 | 15.27    | 1148.401 | 15.77451 | 1148.401 | 15.56374 | 1148.401 | 15.75    | 1148.401 |
| 1148.402 | 15.27377 | 1148.401 | 15.78    | 1148.401 | 15.57    | 1148.401 | 15.75651 | 1148.401 |
| 1148.402 | 15.28    | 1148.401 | 15.78451 | 1148.401 | 15.57374 | 1148.401 | 15.76    | 1148.401 |
| 1148.402 | 15.28377 | 1148.401 | 15.79    | 1148.401 | 15.58    | 1148.401 | 15.76651 | 1148.401 |
| 1148.402 | 15.29    | 1148.401 | 15.79451 | 1148.401 | 15.58374 | 1148.401 | 15.77    | 1148.401 |
| 1148.402 | 15.29377 | 1148.401 | 15.8     | 1148.401 | 15.59    | 1148.401 | 15.77651 | 1148.401 |
| 1148.402 | 15.3     | 1148.401 | 15.80451 | 1148.401 | 15.59374 | 1148.401 | 15.78    | 1148.401 |
| 1148.402 | 15.30377 | 1148.401 | 15.81    | 1148.402 | 15.6     | 1148.401 | 15.78651 | 1148.401 |
| 1148.402 | 15.31    | 1148.401 | 15.81451 | 1148.402 | 15.60374 | 1148.401 | 15.79    | 1148.401 |
| 1148.402 | 15.31377 | 1148.401 | 15.82    | 1148.402 | 15.61    | 1148.401 | 15.79651 | 1148.401 |
| 1148.402 | 15.32    | 1148.401 | 15.82451 | 1148.402 | 15.61374 | 1148.401 | 15.8     | 1148.401 |
| 1148.402 | 15.32377 | 1148.401 | 15.83    | 1148.402 | 15.62    | 1148.401 | 15.80651 | 1148.402 |
| 1148.402 | 15.33    | 1148.401 | 15.83451 | 1148.402 | 15.62374 | 1148.401 | 15.81    | 1148.402 |
| 1148.402 | 15.33377 | 1148.401 | 15.84    | 1148.402 | 15.63    | 1148.401 | 15.81651 | 1148.402 |

|          |          |          |          |          |          |          |          |          |
|----------|----------|----------|----------|----------|----------|----------|----------|----------|
| 1148.402 | 15.34    | 1148.401 | 15.84451 | 1148.402 | 15.63374 | 1148.401 | 15.82    | 1148.402 |
| 1148.402 | 15.34377 | 1148.401 | 15.85    | 1148.402 | 15.64    | 1148.401 | 15.82651 | 1148.402 |
| 1148.402 | 15.35    | 1148.401 | 15.85451 | 1148.402 | 15.64374 | 1148.401 | 15.83    | 1148.402 |
| 1148.402 | 15.35377 | 1148.401 | 15.86    | 1148.402 | 15.65    | 1148.401 | 15.83651 | 1148.402 |
| 1148.402 | 15.36    | 1148.401 | 15.86451 | 1148.402 | 15.65374 | 1148.401 | 15.84    | 1148.402 |
| 1148.402 | 15.36377 | 1148.401 | 15.87    | 1148.402 | 15.66    | 1148.401 | 15.84651 | 1148.402 |
| 1148.402 | 15.37    | 1148.401 | 15.87451 | 1148.402 | 15.66374 | 1148.401 | 15.85    | 1148.402 |
| 1148.402 | 15.37377 | 1148.401 | 15.88    | 1148.402 | 15.67    | 1148.401 | 15.85651 | 1148.402 |
| 1148.402 | 15.38    | 1148.401 | 15.88451 | 1148.402 | 15.67374 | 1148.401 | 15.86    | 1148.402 |
| 1148.402 | 15.38377 | 1148.401 | 15.89    | 1148.402 | 15.68    | 1148.401 | 15.86651 | 1148.402 |
| 1148.402 | 15.39    | 1148.401 | 15.89451 | 1148.402 | 15.68374 | 1148.401 | 15.87    | 1148.402 |
| 1148.402 | 15.39377 | 1148.401 | 15.9     | 1148.402 | 15.69    | 1148.401 | 15.87651 | 1148.402 |
| 1148.402 | 15.4     | 1148.401 | 15.90451 | 1148.402 | 15.69374 | 1148.401 | 15.88    | 1148.402 |
| 1148.402 | 15.40377 | 1148.401 | 15.91    | 1148.402 | 15.7     | 1148.401 | 15.88651 | 1148.402 |
| 1148.402 | 15.41    | 1148.401 | 15.91451 | 1148.402 | 15.70374 | 1148.401 | 15.89    | 1148.402 |
| 1148.402 | 15.41377 | 1148.402 | 15.92    | 1148.402 | 15.71    | 1148.401 | 15.89651 | 1148.402 |
| 1148.402 | 15.42    | 1148.402 | 15.92451 | 1148.402 | 15.71374 | 1148.401 | 15.9     | 1148.402 |
| 1148.402 | 15.42377 | 1148.402 | 15.93    | 1148.402 | 15.72    | 1148.401 | 15.90651 | 1148.402 |
| 1148.402 | 15.43    | 1148.402 | 15.93451 | 1148.402 | 15.72374 | 1148.401 | 15.91    | 1148.402 |
| 1148.402 | 15.43377 | 1148.402 | 15.94    | 1148.402 | 15.73    | 1148.401 | 15.91651 | 1148.402 |
| 1148.402 | 15.44    | 1148.402 | 15.94451 | 1148.402 | 15.73374 | 1148.401 | 15.92    | 1148.402 |
| 1148.402 | 15.44377 | 1148.402 | 15.95    | 1148.402 | 15.74    | 1148.401 | 15.92651 | 1148.402 |
| 1148.402 | 15.45    | 1148.402 | 15.95451 | 1148.402 | 15.74374 | 1148.401 | 15.93    | 1148.402 |
| 1148.402 | 15.45377 | 1148.402 | 15.96    | 1148.402 | 15.75    | 1148.401 | 15.93651 | 1148.402 |
| 1148.402 | 15.46    | 1148.402 | 15.96451 | 1148.402 | 15.75374 | 1148.401 | 15.94    | 1148.402 |
| 1148.402 | 15.46377 | 1148.402 | 15.97    | 1148.402 | 15.76    | 1148.401 | 15.94651 | 1148.402 |
| 1148.402 | 15.47    | 1148.402 | 15.97451 | 1148.402 | 15.76374 | 1148.401 | 15.95    | 1148.402 |
| 1148.402 | 15.47377 | 1148.402 | 15.98    | 1148.402 | 15.77    | 1148.401 | 15.95651 | 1148.402 |
| 1148.402 | 15.48    | 1148.402 | 15.98451 | 1148.402 | 15.77374 | 1148.401 | 15.96    | 1148.402 |
| 1148.402 | 15.48377 | 1148.402 | 15.99    | 1148.402 | 15.78    | 1148.401 | 15.96651 | 1148.402 |
| 1148.402 | 15.49    | 1148.402 | 15.99451 | 1148.402 | 15.78374 | 1148.401 | 15.97    | 1148.402 |
| 1148.402 | 15.49377 | 1148.402 | 16       | 1148.402 | 15.79    | 1148.401 | 15.97651 | 1148.402 |
| 1148.402 | 15.5     | 1148.402 | 16.00451 | 1148.402 | 15.79374 | 1148.401 | 15.98    | 1148.402 |
| 1148.402 | 15.50377 | 1148.402 | 16.01    | 1148.402 | 15.8     | 1148.401 | 15.98651 | 1148.402 |
| 1148.402 | 15.51    | 1148.402 | 16.01451 | 1148.402 | 15.80374 | 1148.401 | 15.99    | 1148.402 |
| 1148.402 | 15.51377 | 1148.402 | 16.02    | 1148.402 | 15.81    | 1148.401 | 15.99651 | 1148.402 |
| 1148.402 | 15.52    | 1148.402 | 16.02451 | 1148.402 | 15.81374 | 1148.402 | 16       | 1148.402 |
| 1148.402 | 15.52377 | 1148.402 | 16.03    | 1148.402 | 15.82    | 1148.402 | 16.00651 | 1148.402 |
| 1148.402 | 15.53    | 1148.402 | 16.03451 | 1148.402 | 15.82374 | 1148.402 | 16.01    | 1148.402 |
| 1148.402 | 15.53377 | 1148.402 | 16.04    | 1148.402 | 15.83    | 1148.402 | 16.01651 | 1148.402 |
| 1148.402 | 15.54    | 1148.402 | 16.04451 | 1148.402 | 15.83374 | 1148.402 | 16.02    | 1148.402 |
| 1148.402 | 15.54377 | 1148.402 | 16.05    | 1148.402 | 15.84    | 1148.402 | 16.02651 | 1148.402 |
| 1148.402 | 15.55    | 1148.402 | 16.05451 | 1148.402 | 15.84374 | 1148.402 | 16.03    | 1148.402 |
| 1148.402 | 15.55377 | 1148.402 | 16.06    | 1148.402 | 15.85    | 1148.402 | 16.03651 | 1148.402 |
| 1148.402 | 15.56    | 1148.402 | 16.06451 | 1148.402 | 15.85374 | 1148.402 | 16.04    | 1148.402 |
| 1148.402 | 15.56377 | 1148.402 | 16.07    | 1148.402 | 15.86    | 1148.402 | 16.04651 | 1148.402 |
| 1148.402 | 15.57    | 1148.402 | 16.07451 | 1148.402 | 15.86374 | 1148.402 | 16.05    | 1148.402 |

|          |          |          |          |          |          |          |          |          |
|----------|----------|----------|----------|----------|----------|----------|----------|----------|
| 1148.402 | 15.57377 | 1148.402 | 16.08    | 1148.402 | 15.87    | 1148.402 | 16.05651 | 1148.402 |
| 1148.402 | 15.58    | 1148.402 | 16.08451 | 1148.402 | 15.87374 | 1148.402 | 16.06    | 1148.402 |
| 1148.402 | 15.58377 | 1148.402 | 16.09    | 1148.402 | 15.88    | 1148.402 | 16.06651 | 1148.402 |
| 1148.402 | 15.59    | 1148.402 | 16.09451 | 1148.402 | 15.88374 | 1148.402 | 16.07    | 1148.402 |
| 1148.402 | 15.59377 | 1148.402 | 16.1     | 1148.402 | 15.89    | 1148.402 | 16.07651 | 1148.402 |
| 1148.402 | 15.6     | 1148.402 | 16.10451 | 1148.402 | 15.89374 | 1148.402 | 16.08    | 1148.402 |
| 1148.402 | 15.60377 | 1148.402 | 16.11    | 1148.402 | 15.9     | 1148.402 | 16.08651 | 1148.402 |
| 1148.402 | 15.61    | 1148.402 | 16.11451 | 1148.402 | 15.90374 | 1148.402 | 16.09    | 1148.402 |
| 1148.402 | 15.61377 | 1148.402 | 16.12    | 1148.402 | 15.91    | 1148.402 | 16.09651 | 1148.402 |
| 1148.402 | 15.62    | 1148.402 | 16.12451 | 1148.402 | 15.91374 | 1148.402 | 16.1     | 1148.402 |
| 1148.402 | 15.62377 | 1148.402 | 16.13    | 1148.402 | 15.92    | 1148.402 | 16.10651 | 1148.402 |
| 1148.402 | 15.63    | 1148.402 | 16.13451 | 1148.402 | 15.92374 | 1148.402 | 16.11    | 1148.402 |
| 1148.402 | 15.63377 | 1148.402 | 16.14    | 1148.402 | 15.93    | 1148.402 | 16.11651 | 1148.402 |
| 1148.402 | 15.64    | 1148.402 | 16.14451 | 1148.402 | 15.93374 | 1148.402 | 16.12    | 1148.402 |
| 1148.402 | 15.64377 | 1148.402 | 16.15    | 1148.402 | 15.94    | 1148.402 | 16.12651 | 1148.402 |
| 1148.402 | 15.65    | 1148.402 | 16.15451 | 1148.402 | 15.94374 | 1148.402 | 16.13    | 1148.402 |
| 1148.402 | 15.65377 | 1148.402 | 16.16    | 1148.402 | 15.95    | 1148.402 | 16.13651 | 1148.402 |
| 1148.402 | 15.66    | 1148.402 | 16.16451 | 1148.402 | 15.95374 | 1148.402 | 16.14    | 1148.402 |
| 1148.402 | 15.66377 | 1148.402 | 16.17    | 1148.402 | 15.96    | 1148.402 | 16.14651 | 1148.402 |
| 1148.402 | 15.67    | 1148.402 | 16.17451 | 1148.402 | 15.96374 | 1148.402 | 16.15    | 1148.402 |
| 1148.402 | 15.67377 | 1148.402 | 16.18    | 1148.402 | 15.97    | 1148.402 | 16.15651 | 1148.402 |
| 1148.402 | 15.68    | 1148.402 | 16.18451 | 1148.402 | 15.97374 | 1148.402 | 16.16    | 1148.402 |
| 1148.402 | 15.68377 | 1148.402 | 16.19    | 1148.402 | 15.98    | 1148.402 | 16.16651 | 1148.402 |
| 1148.402 | 15.69    | 1148.402 | 16.19451 | 1148.402 | 15.98374 | 1148.402 | 16.17    | 1148.402 |
| 1148.402 | 15.69377 | 1148.402 | 16.2     | 1148.402 | 15.99    | 1148.402 | 16.17651 | 1148.402 |
| 1148.402 | 15.7     | 1148.402 | 16.20451 | 1148.402 | 15.99374 | 1148.402 | 16.18    | 1148.402 |
| 1148.402 | 15.70377 | 1148.402 | 16.21    | 1148.402 | 16       | 1148.402 | 16.18651 | 1148.402 |
| 1148.402 | 15.71    | 1148.402 | 16.21451 | 1148.402 | 16.00374 | 1148.402 | 16.19    | 1148.402 |
| 1148.402 | 15.71377 | 1148.402 | 16.22    | 1148.402 | 16.01    | 1148.402 | 16.19651 | 1148.402 |
| 1148.402 | 15.72    | 1148.402 | 16.22451 | 1148.402 | 16.01374 | 1148.402 | 16.2     | 1148.402 |
| 1148.402 | 15.72377 | 1148.402 | 16.23    | 1148.402 | 16.02    | 1148.402 | 16.20651 | 1148.402 |
| 1148.402 | 15.73    | 1148.402 | 16.23451 | 1148.402 | 16.02374 | 1148.402 | 16.21    | 1148.402 |
| 1148.402 | 15.73377 | 1148.402 | 16.24    | 1148.402 | 16.03    | 1148.402 | 16.21651 | 1148.402 |
| 1148.402 | 15.74    | 1148.402 | 16.24451 | 1148.402 | 16.03374 | 1148.402 | 16.22    | 1148.402 |
| 1148.402 | 15.74377 | 1148.402 | 16.25    | 1148.402 | 16.04    | 1148.402 | 16.22651 | 1148.402 |
| 1148.403 | 15.75    | 1148.402 | 16.25451 | 1148.402 | 16.04374 | 1148.402 | 16.23    | 1148.402 |
| 1148.403 | 15.75377 | 1148.402 | 16.26    | 1148.402 | 16.05    | 1148.402 | 16.23651 | 1148.402 |
| 1148.403 | 15.76    | 1148.402 | 16.26451 | 1148.402 | 16.05374 | 1148.402 | 16.24    | 1148.402 |
| 1148.403 | 15.76377 | 1148.402 | 16.27    | 1148.402 | 16.06    | 1148.402 | 16.24651 | 1148.402 |
| 1148.403 | 15.77    | 1148.402 | 16.27451 | 1148.402 | 16.06374 | 1148.402 | 16.25    | 1148.402 |
| 1148.403 | 15.77377 | 1148.402 | 16.28    | 1148.402 | 16.07    | 1148.402 | 16.25651 | 1148.402 |
| 1148.403 | 15.78    | 1148.402 | 16.28451 | 1148.402 | 16.07374 | 1148.402 | 16.26    | 1148.402 |
| 1148.403 | 15.78377 | 1148.402 | 16.29    | 1148.402 | 16.08    | 1148.402 | 16.26651 | 1148.402 |
| 1148.403 | 15.79    | 1148.402 | 16.29451 | 1148.402 | 16.08374 | 1148.402 | 16.27    | 1148.402 |
| 1148.403 | 15.79377 | 1148.402 | 16.3     | 1148.402 | 16.09    | 1148.402 | 16.27651 | 1148.402 |
| 1148.403 | 15.8     | 1148.402 | 16.30451 | 1148.402 | 16.09374 | 1148.402 | 16.28    | 1148.402 |
| 1148.403 | 15.80377 | 1148.402 | 16.31    | 1148.402 | 16.1     | 1148.402 | 16.28651 | 1148.402 |

|          |          |          |          |          |          |          |          |          |
|----------|----------|----------|----------|----------|----------|----------|----------|----------|
| 1148.403 | 15.81    | 1148.402 | 16.31451 | 1148.402 | 16.10374 | 1148.402 | 16.29    | 1148.402 |
| 1148.403 | 15.81377 | 1148.402 | 16.32    | 1148.402 | 16.11    | 1148.402 | 16.29651 | 1148.402 |
| 1148.403 | 15.82    | 1148.402 | 16.32451 | 1148.402 | 16.11374 | 1148.402 | 16.3     | 1148.402 |
| 1148.403 | 15.82377 | 1148.402 | 16.33    | 1148.402 | 16.12    | 1148.402 | 16.30651 | 1148.402 |
| 1148.403 | 15.83    | 1148.402 | 16.33451 | 1148.402 | 16.12374 | 1148.402 | 16.31    | 1148.402 |
| 1148.403 | 15.83377 | 1148.402 | 16.34    | 1148.402 | 16.13    | 1148.402 | 16.31651 | 1148.402 |
| 1148.403 | 15.84    | 1148.402 | 16.34451 | 1148.402 | 16.13374 | 1148.402 | 16.32    | 1148.402 |
| 1148.403 | 15.84377 | 1148.402 | 16.35    | 1148.402 | 16.14    | 1148.402 | 16.32651 | 1148.402 |
| 1148.403 | 15.85    | 1148.402 | 16.35451 | 1148.402 | 16.14374 | 1148.402 | 16.33    | 1148.402 |
| 1148.403 | 15.85377 | 1148.402 | 16.36    | 1148.402 | 16.15    | 1148.402 | 16.33651 | 1148.402 |
| 1148.403 | 15.86    | 1148.402 | 16.36451 | 1148.402 | 16.15374 | 1148.402 | 16.34    | 1148.402 |
| 1148.403 | 15.86377 | 1148.402 | 16.37    | 1148.402 | 16.16    | 1148.402 | 16.34651 | 1148.402 |
| 1148.403 | 15.87    | 1148.402 | 16.37451 | 1148.402 | 16.16374 | 1148.402 | 16.35    | 1148.402 |
| 1148.403 | 15.87377 | 1148.402 | 16.38    | 1148.402 | 16.17    | 1148.402 | 16.35651 | 1148.402 |
| 1148.403 | 15.88    | 1148.402 | 16.38451 | 1148.402 | 16.17374 | 1148.402 | 16.36    | 1148.402 |
| 1148.403 | 15.88377 | 1148.402 | 16.39    | 1148.402 | 16.18    | 1148.402 | 16.36651 | 1148.402 |
| 1148.403 | 15.89    | 1148.402 | 16.39451 | 1148.402 | 16.18374 | 1148.402 | 16.37    | 1148.402 |
| 1148.403 | 15.89377 | 1148.402 | 16.4     | 1148.402 | 16.19    | 1148.402 | 16.37651 | 1148.402 |
| 1148.403 | 15.9     | 1148.402 | 16.40451 | 1148.402 | 16.19374 | 1148.402 | 16.38    | 1148.402 |
| 1148.403 | 15.90377 | 1148.402 | 16.41    | 1148.402 | 16.2     | 1148.402 | 16.38651 | 1148.402 |
| 1148.403 | 15.91    | 1148.402 | 16.41451 | 1148.403 | 16.20374 | 1148.402 | 16.39    | 1148.402 |
| 1148.403 | 15.91377 | 1148.402 | 16.42    | 1148.403 | 16.21    | 1148.402 | 16.39651 | 1148.402 |
| 1148.403 | 15.92    | 1148.402 | 16.42451 | 1148.403 | 16.21374 | 1148.402 | 16.4     | 1148.402 |
| 1148.403 | 15.92377 | 1148.402 | 16.43    | 1148.403 | 16.22    | 1148.402 | 16.40651 | 1148.403 |
| 1148.403 | 15.93    | 1148.402 | 16.43451 | 1148.403 | 16.22374 | 1148.402 | 16.41    | 1148.403 |
| 1148.403 | 15.93377 | 1148.402 | 16.44    | 1148.403 | 16.23    | 1148.402 | 16.41651 | 1148.403 |
| 1148.403 | 15.94    | 1148.402 | 16.44451 | 1148.403 | 16.23374 | 1148.402 | 16.42    | 1148.403 |
| 1148.403 | 15.94377 | 1148.402 | 16.45    | 1148.403 | 16.24    | 1148.402 | 16.42651 | 1148.403 |
| 1148.403 | 15.95    | 1148.402 | 16.45451 | 1148.403 | 16.24374 | 1148.402 | 16.43    | 1148.403 |
| 1148.403 | 15.95377 | 1148.402 | 16.46    | 1148.403 | 16.25    | 1148.402 | 16.43651 | 1148.403 |
| 1148.403 | 15.96    | 1148.402 | 16.46451 | 1148.403 | 16.25374 | 1148.402 | 16.44    | 1148.403 |
| 1148.403 | 15.96377 | 1148.402 | 16.47    | 1148.403 | 16.26    | 1148.402 | 16.44651 | 1148.403 |
| 1148.403 | 15.97    | 1148.402 | 16.47451 | 1148.403 | 16.26374 | 1148.402 | 16.45    | 1148.403 |
| 1148.403 | 15.97377 | 1148.402 | 16.48    | 1148.403 | 16.27    | 1148.402 | 16.45651 | 1148.403 |
| 1148.403 | 15.98    | 1148.402 | 16.48451 | 1148.403 | 16.27374 | 1148.402 | 16.46    | 1148.403 |
| 1148.403 | 15.98377 | 1148.402 | 16.49    | 1148.403 | 16.28    | 1148.402 | 16.46651 | 1148.403 |
| 1148.403 | 15.99    | 1148.402 | 16.49451 | 1148.403 | 16.28374 | 1148.402 | 16.47    | 1148.403 |
| 1148.403 | 15.99377 | 1148.402 | 16.5     | 1148.403 | 16.29    | 1148.402 | 16.47651 | 1148.403 |
| 1148.403 | 16       | 1148.402 | 16.50451 | 1148.403 | 16.29374 | 1148.402 | 16.48    | 1148.403 |
| 1148.403 | 16.00377 | 1148.402 | 16.51    | 1148.403 | 16.3     | 1148.402 | 16.48651 | 1148.403 |
| 1148.403 | 16.01    | 1148.402 | 16.51451 | 1148.403 | 16.30374 | 1148.402 | 16.49    | 1148.403 |
| 1148.403 | 16.01377 | 1148.402 | 16.52    | 1148.403 | 16.31    | 1148.402 | 16.49651 | 1148.403 |
| 1148.403 | 16.02    | 1148.403 | 16.52451 | 1148.403 | 16.31374 | 1148.402 | 16.5     | 1148.403 |
| 1148.403 | 16.02377 | 1148.403 | 16.53    | 1148.403 | 16.32    | 1148.402 | 16.50651 | 1148.403 |
| 1148.403 | 16.03    | 1148.403 | 16.53451 | 1148.403 | 16.32374 | 1148.402 | 16.51    | 1148.403 |
| 1148.403 | 16.03377 | 1148.403 | 16.54    | 1148.403 | 16.33    | 1148.402 | 16.51651 | 1148.403 |
| 1148.403 | 16.04    | 1148.403 | 16.54451 | 1148.403 | 16.33374 | 1148.402 | 16.52    | 1148.403 |

|          |          |          |          |          |          |          |          |          |
|----------|----------|----------|----------|----------|----------|----------|----------|----------|
| 1148.403 | 16.04377 | 1148.403 | 16.55    | 1148.403 | 16.34    | 1148.402 | 16.52651 | 1148.403 |
| 1148.403 | 16.05    | 1148.403 | 16.55451 | 1148.403 | 16.34374 | 1148.402 | 16.53    | 1148.403 |
| 1148.403 | 16.05377 | 1148.403 | 16.56    | 1148.403 | 16.35    | 1148.402 | 16.53651 | 1148.403 |
| 1148.403 | 16.06    | 1148.403 | 16.56451 | 1148.403 | 16.35374 | 1148.402 | 16.54    | 1148.403 |
| 1148.403 | 16.06377 | 1148.403 | 16.57    | 1148.403 | 16.36    | 1148.402 | 16.54651 | 1148.403 |
| 1148.403 | 16.07    | 1148.403 | 16.57451 | 1148.403 | 16.36374 | 1148.402 | 16.55    | 1148.403 |
| 1148.403 | 16.07377 | 1148.403 | 16.58    | 1148.403 | 16.37    | 1148.402 | 16.55651 | 1148.403 |
| 1148.403 | 16.08    | 1148.403 | 16.58451 | 1148.403 | 16.37374 | 1148.402 | 16.56    | 1148.403 |
| 1148.403 | 16.08377 | 1148.403 | 16.59    | 1148.403 | 16.38    | 1148.402 | 16.56651 | 1148.403 |
| 1148.403 | 16.09    | 1148.403 | 16.59451 | 1148.403 | 16.38374 | 1148.402 | 16.57    | 1148.403 |
| 1148.403 | 16.09377 | 1148.403 | 16.6     | 1148.403 | 16.39    | 1148.402 | 16.57651 | 1148.403 |
| 1148.403 | 16.1     | 1148.403 | 16.60451 | 1148.403 | 16.39374 | 1148.402 | 16.58    | 1148.403 |
| 1148.403 | 16.10377 | 1148.403 | 16.61    | 1148.403 | 16.4     | 1148.402 | 16.58651 | 1148.403 |
| 1148.403 | 16.11    | 1148.403 | 16.61451 | 1148.403 | 16.40374 | 1148.402 | 16.59    | 1148.403 |
| 1148.403 | 16.11377 | 1148.403 | 16.62    | 1148.403 | 16.41    | 1148.402 | 16.59651 | 1148.403 |
| 1148.403 | 16.12    | 1148.403 | 16.62451 | 1148.403 | 16.41374 | 1148.402 | 16.6     | 1148.403 |
| 1148.403 | 16.12377 | 1148.403 | 16.63    | 1148.403 | 16.42    | 1148.403 | 16.60651 | 1148.403 |
| 1148.403 | 16.13    | 1148.403 | 16.63451 | 1148.403 | 16.42374 | 1148.403 | 16.61    | 1148.403 |
| 1148.403 | 16.13377 | 1148.403 | 16.64    | 1148.403 | 16.43    | 1148.403 | 16.61651 | 1148.403 |
| 1148.403 | 16.14    | 1148.403 | 16.64451 | 1148.403 | 16.43374 | 1148.403 | 16.62    | 1148.403 |
| 1148.403 | 16.14377 | 1148.403 | 16.65    | 1148.403 | 16.44    | 1148.403 | 16.62651 | 1148.403 |
| 1148.403 | 16.15    | 1148.403 | 16.65451 | 1148.403 | 16.44374 | 1148.403 | 16.63    | 1148.403 |
| 1148.403 | 16.15377 | 1148.403 | 16.66    | 1148.403 | 16.45    | 1148.403 | 16.63651 | 1148.403 |
| 1148.403 | 16.16    | 1148.403 | 16.66451 | 1148.403 | 16.45374 | 1148.403 | 16.64    | 1148.403 |
| 1148.403 | 16.16377 | 1148.403 | 16.67    | 1148.403 | 16.46    | 1148.403 | 16.64651 | 1148.403 |
| 1148.403 | 16.17    | 1148.403 | 16.67451 | 1148.403 | 16.46374 | 1148.403 | 16.65    | 1148.403 |
| 1148.403 | 16.17377 | 1148.403 | 16.68    | 1148.403 | 16.47    | 1148.403 | 16.65651 | 1148.403 |
| 1148.403 | 16.18    | 1148.403 | 16.68451 | 1148.403 | 16.47374 | 1148.403 | 16.66    | 1148.403 |
| 1148.403 | 16.18377 | 1148.403 | 16.69    | 1148.403 | 16.48    | 1148.403 | 16.66651 | 1148.403 |
| 1148.403 | 16.19    | 1148.403 | 16.69451 | 1148.403 | 16.48374 | 1148.403 | 16.67    | 1148.403 |
| 1148.403 | 16.19377 | 1148.403 | 16.7     | 1148.403 | 16.49    | 1148.403 | 16.67651 | 1148.403 |
| 1148.403 | 16.2     | 1148.403 | 16.70451 | 1148.403 | 16.49374 | 1148.403 | 16.68    | 1148.403 |
| 1148.403 | 16.20377 | 1148.403 | 16.71    | 1148.403 | 16.5     | 1148.403 | 16.68651 | 1148.403 |
| 1148.403 | 16.21    | 1148.403 | 16.71451 | 1148.403 | 16.50374 | 1148.403 | 16.69    | 1148.403 |
| 1148.403 | 16.21377 | 1148.403 | 16.72    | 1148.403 | 16.51    | 1148.403 | 16.69651 | 1148.403 |
| 1148.403 | 16.22    | 1148.403 | 16.72451 | 1148.403 | 16.51374 | 1148.403 | 16.7     | 1148.403 |
| 1148.403 | 16.22377 | 1148.403 | 16.73    | 1148.403 | 16.52    | 1148.403 | 16.70651 | 1148.403 |
| 1148.403 | 16.23    | 1148.403 | 16.73451 | 1148.403 | 16.52374 | 1148.403 | 16.71    | 1148.403 |
| 1148.403 | 16.23377 | 1148.403 | 16.74    | 1148.403 | 16.53    | 1148.403 | 16.71651 | 1148.403 |
| 1148.403 | 16.24    | 1148.403 | 16.74451 | 1148.403 | 16.53374 | 1148.403 | 16.72    | 1148.403 |
| 1148.403 | 16.24377 | 1148.403 | 16.75    | 1148.403 | 16.54    | 1148.403 | 16.72651 | 1148.403 |
| 1148.403 | 16.25    | 1148.403 | 16.75451 | 1148.403 | 16.54374 | 1148.403 | 16.73    | 1148.403 |
| 1148.403 | 16.25377 | 1148.403 | 16.76    | 1148.403 | 16.55    | 1148.403 | 16.73651 | 1148.403 |
| 1148.403 | 16.26    | 1148.403 | 16.76451 | 1148.403 | 16.55374 | 1148.403 | 16.74    | 1148.403 |
| 1148.403 | 16.26377 | 1148.403 | 16.77    | 1148.403 | 16.56    | 1148.403 | 16.74651 | 1148.403 |
| 1148.403 | 16.27    | 1148.403 | 16.77451 | 1148.403 | 16.56374 | 1148.403 | 16.75    | 1148.403 |
| 1148.403 | 16.27377 | 1148.403 | 16.78    | 1148.403 | 16.57    | 1148.403 | 16.75651 | 1148.403 |

|          |          |          |          |          |          |          |          |          |
|----------|----------|----------|----------|----------|----------|----------|----------|----------|
| 1148.403 | 16.28    | 1148.403 | 16.78451 | 1148.403 | 16.57374 | 1148.403 | 16.76    | 1148.403 |
| 1148.403 | 16.28377 | 1148.403 | 16.79    | 1148.403 | 16.58    | 1148.403 | 16.76651 | 1148.403 |
| 1148.403 | 16.29    | 1148.403 | 16.79451 | 1148.403 | 16.58374 | 1148.403 | 16.77    | 1148.403 |
| 1148.403 | 16.29377 | 1148.403 | 16.8     | 1148.403 | 16.59    | 1148.403 | 16.77651 | 1148.403 |
| 1148.403 | 16.3     | 1148.403 | 16.80451 | 1148.403 | 16.59374 | 1148.403 | 16.78    | 1148.403 |
| 1148.403 | 16.30377 | 1148.403 | 16.81    | 1148.403 | 16.6     | 1148.403 | 16.78651 | 1148.403 |
| 1148.403 | 16.31    | 1148.403 | 16.81451 | 1148.403 | 16.60374 | 1148.403 | 16.79    | 1148.403 |
| 1148.403 | 16.31377 | 1148.403 | 16.82    | 1148.403 | 16.61    | 1148.403 | 16.79651 | 1148.403 |
| 1148.403 | 16.32    | 1148.403 | 16.82451 | 1148.403 | 16.61374 | 1148.403 | 16.8     | 1148.403 |
| 1148.403 | 16.32377 | 1148.403 | 16.83    | 1148.403 | 16.62    | 1148.403 | 16.80651 | 1148.403 |
| 1148.403 | 16.33    | 1148.403 | 16.83451 | 1148.403 | 16.62374 | 1148.403 | 16.81    | 1148.403 |
| 1148.403 | 16.33377 | 1148.403 | 16.84    | 1148.403 | 16.63    | 1148.403 | 16.81651 | 1148.403 |
| 1148.403 | 16.34    | 1148.403 | 16.84451 | 1148.403 | 16.63374 | 1148.403 | 16.82    | 1148.403 |
| 1148.403 | 16.34377 | 1148.403 | 16.85    | 1148.403 | 16.64    | 1148.403 | 16.82651 | 1148.403 |
| 1148.403 | 16.35    | 1148.403 | 16.85451 | 1148.403 | 16.64374 | 1148.403 | 16.83    | 1148.403 |
| 1148.403 | 16.35377 | 1148.403 | 16.86    | 1148.403 | 16.65    | 1148.403 | 16.83651 | 1148.403 |
| 1148.403 | 16.36    | 1148.403 | 16.86451 | 1148.403 | 16.65374 | 1148.403 | 16.84    | 1148.403 |
| 1148.403 | 16.36377 | 1148.403 | 16.87    | 1148.403 | 16.66    | 1148.403 | 16.84651 | 1148.403 |
| 1148.403 | 16.37    | 1148.403 | 16.87451 | 1148.403 | 16.66374 | 1148.403 | 16.85    | 1148.403 |
| 1148.403 | 16.37377 | 1148.403 | 16.88    | 1148.403 | 16.67    | 1148.403 | 16.85651 | 1148.403 |
| 1148.403 | 16.38    | 1148.403 | 16.88451 | 1148.403 | 16.67374 | 1148.403 | 16.86    | 1148.403 |
| 1148.403 | 16.38377 | 1148.403 | 16.89    | 1148.403 | 16.68    | 1148.403 | 16.86651 | 1148.403 |
| 1148.403 | 16.39    | 1148.403 | 16.89451 | 1148.403 | 16.68374 | 1148.403 | 16.87    | 1148.403 |
| 1148.403 | 16.39377 | 1148.403 | 16.9     | 1148.403 | 16.69    | 1148.403 | 16.87651 | 1148.403 |
| 1148.403 | 16.4     | 1148.403 | 16.90451 | 1148.403 | 16.69374 | 1148.403 | 16.88    | 1148.403 |
| 1148.403 | 16.40377 | 1148.403 | 16.91    | 1148.403 | 16.7     | 1148.403 | 16.88651 | 1148.403 |
| 1148.403 | 16.41    | 1148.403 | 16.91451 | 1148.403 | 16.70374 | 1148.403 | 16.89    | 1148.403 |
| 1148.403 | 16.41377 | 1148.403 | 16.92    | 1148.403 | 16.71    | 1148.403 | 16.89651 | 1148.403 |
| 1148.403 | 16.42    | 1148.403 | 16.92451 | 1148.403 | 16.71374 | 1148.403 | 16.9     | 1148.403 |
| 1148.403 | 16.42377 | 1148.403 | 16.93    | 1148.403 | 16.72    | 1148.403 | 16.90651 | 1148.403 |
| 1148.403 | 16.43    | 1148.403 | 16.93451 | 1148.403 | 16.72374 | 1148.403 | 16.91    | 1148.403 |
| 1148.403 | 16.43377 | 1148.403 | 16.94    | 1148.403 | 16.73    | 1148.403 | 16.91651 | 1148.403 |
| 1148.403 | 16.44    | 1148.403 | 16.94451 | 1148.403 | 16.73374 | 1148.403 | 16.92    | 1148.403 |
| 1148.403 | 16.44377 | 1148.403 | 16.95    | 1148.403 | 16.74    | 1148.403 | 16.92651 | 1148.403 |
| 1148.403 | 16.45    | 1148.403 | 16.95451 | 1148.403 | 16.74374 | 1148.403 | 16.93    | 1148.403 |
| 1148.403 | 16.45377 | 1148.403 | 16.96    | 1148.403 | 16.75    | 1148.403 | 16.93651 | 1148.403 |
| 1148.403 | 16.46    | 1148.403 | 16.96451 | 1148.403 | 16.75374 | 1148.403 | 16.94    | 1148.403 |
| 1148.403 | 16.46377 | 1148.403 | 16.97    | 1148.403 | 16.76    | 1148.403 | 16.94651 | 1148.403 |
| 1148.403 | 16.47    | 1148.403 | 16.97451 | 1148.403 | 16.76374 | 1148.403 | 16.95    | 1148.403 |
| 1148.403 | 16.47377 | 1148.403 | 16.98    | 1148.403 | 16.77    | 1148.403 | 16.95651 | 1148.403 |
| 1148.403 | 16.48    | 1148.403 | 16.98451 | 1148.403 | 16.77374 | 1148.403 | 16.96    | 1148.403 |
| 1148.403 | 16.48377 | 1148.403 | 16.99    | 1148.403 | 16.78    | 1148.403 | 16.96651 | 1148.403 |
| 1148.403 | 16.49    | 1148.403 | 16.99451 | 1148.403 | 16.78374 | 1148.403 | 16.97    | 1148.403 |
| 1148.403 | 16.49377 | 1148.403 | 17       | 1148.403 | 16.79    | 1148.403 | 16.97651 | 1148.403 |
| 1148.403 | 16.5     | 1148.403 | 17.00451 | 1148.403 | 16.79374 | 1148.403 | 16.98    | 1148.403 |
| 1148.403 | 16.50377 | 1148.403 | 17.01    | 1148.403 | 16.8     | 1148.403 | 16.98651 | 1148.403 |
| 1148.403 | 16.51    | 1148.403 | 17.01451 | 1148.403 | 16.80374 | 1148.403 | 16.99    | 1148.403 |

|          |          |          |          |          |          |          |          |          |
|----------|----------|----------|----------|----------|----------|----------|----------|----------|
| 1148.403 | 16.51377 | 1148.403 | 17.02    | 1148.403 | 16.81    | 1148.403 | 16.99651 | 1148.403 |
| 1148.403 | 16.52    | 1148.403 | 17.02451 | 1148.403 | 16.81374 | 1148.403 | 17       | 1148.403 |
| 1148.403 | 16.52377 | 1148.403 | 17.03    | 1148.403 | 16.82    | 1148.403 | 17.00651 | 1148.403 |
| 1148.403 | 16.53    | 1148.403 | 17.03451 | 1148.403 | 16.82374 | 1148.403 | 17.01    | 1148.403 |
| 1148.403 | 16.53377 | 1148.403 | 17.04    | 1148.403 | 16.83    | 1148.403 | 17.01651 | 1148.403 |
| 1148.403 | 16.54    | 1148.403 | 17.04451 | 1148.403 | 16.83374 | 1148.403 | 17.02    | 1148.403 |
| 1148.403 | 16.54377 | 1148.403 | 17.05    | 1148.403 | 16.84    | 1148.403 | 17.02651 | 1148.403 |
| 1148.403 | 16.55    | 1148.403 | 17.05451 | 1148.403 | 16.84374 | 1148.403 | 17.03    | 1148.403 |
| 1148.403 | 16.55377 | 1148.403 | 17.06    | 1148.403 | 16.85    | 1148.403 | 17.03651 | 1148.403 |
| 1148.403 | 16.56    | 1148.403 | 17.06451 | 1148.403 | 16.85374 | 1148.403 | 17.04    | 1148.403 |
| 1148.403 | 16.56377 | 1148.403 | 17.07    | 1148.403 | 16.86    | 1148.403 | 17.04651 | 1148.403 |
| 1148.403 | 16.57    | 1148.403 | 17.07451 | 1148.403 | 16.86374 | 1148.403 | 17.05    | 1148.403 |
| 1148.403 | 16.57377 | 1148.403 | 17.08    | 1148.403 | 16.87    | 1148.403 | 17.05651 | 1148.403 |
| 1148.403 | 16.58    | 1148.403 | 17.08451 | 1148.403 | 16.87374 | 1148.403 | 17.06    | 1148.403 |
| 1148.403 | 16.58377 | 1148.403 | 17.09    | 1148.403 | 16.88    | 1148.403 | 17.06651 | 1148.403 |
| 1148.403 | 16.59    | 1148.403 | 17.09451 | 1148.403 | 16.88374 | 1148.403 | 17.07    | 1148.403 |
| 1148.403 | 16.59377 | 1148.403 | 17.1     | 1148.403 | 16.89    | 1148.403 | 17.07651 | 1148.403 |
| 1148.403 | 16.6     | 1148.403 | 17.10451 | 1148.403 | 16.89374 | 1148.403 | 17.08    | 1148.403 |
| 1148.403 | 16.60377 | 1148.403 | 17.11    | 1148.403 | 16.9     | 1148.403 | 17.08651 | 1148.403 |
| 1148.403 | 16.61    | 1148.403 | 17.11451 | 1148.403 | 16.90374 | 1148.403 | 17.09    | 1148.403 |
| 1148.403 | 16.61377 | 1148.403 | 17.12    | 1148.403 | 16.91    | 1148.403 | 17.09651 | 1148.403 |
| 1148.403 | 16.62    | 1148.403 | 17.12451 | 1148.403 | 16.91374 | 1148.403 | 17.1     | 1148.403 |
| 1148.403 | 16.62377 | 1148.403 | 17.13    | 1148.403 | 16.92    | 1148.403 | 17.10651 | 1148.403 |
| 1148.403 | 16.63    | 1148.403 | 17.13451 | 1148.403 | 16.92374 | 1148.403 | 17.11    | 1148.403 |
| 1148.403 | 16.63377 | 1148.403 | 17.14    | 1148.403 | 16.93    | 1148.403 | 17.11651 | 1148.403 |
| 1148.403 | 16.64    | 1148.403 | 17.14451 | 1148.403 | 16.93374 | 1148.403 | 17.12    | 1148.403 |
| 1148.403 | 16.64377 | 1148.403 | 17.15    | 1148.403 | 16.94    | 1148.403 | 17.12651 | 1148.403 |
| 1148.403 | 16.65    | 1148.403 | 17.15451 | 1148.403 | 16.94374 | 1148.403 | 17.13    | 1148.403 |
| 1148.403 | 16.65377 | 1148.403 | 17.16    | 1148.403 | 16.95    | 1148.403 | 17.13651 | 1148.403 |
| 1148.403 | 16.66    | 1148.403 | 17.16451 | 1148.403 | 16.95374 | 1148.403 | 17.14    | 1148.403 |
| 1148.403 | 16.66377 | 1148.403 | 17.17    | 1148.403 | 16.96    | 1148.403 | 17.14651 | 1148.403 |
| 1148.403 | 16.67    | 1148.403 | 17.17451 | 1148.403 | 16.96374 | 1148.403 | 17.15    | 1148.403 |
| 1148.403 | 16.67377 | 1148.403 | 17.18    | 1148.403 | 16.97    | 1148.403 | 17.15651 | 1148.403 |
| 1148.403 | 16.68    | 1148.403 | 17.18451 | 1148.403 | 16.97374 | 1148.403 | 17.16    | 1148.403 |
| 1148.403 | 16.68377 | 1148.403 | 17.19    | 1148.403 | 16.98    | 1148.403 | 17.16651 | 1148.403 |
| 1148.403 | 16.69    | 1148.403 | 17.19451 | 1148.403 | 16.98374 | 1148.403 | 17.17    | 1148.403 |
| 1148.403 | 16.69377 | 1148.403 | 17.2     | 1148.403 | 16.99    | 1148.403 | 17.17651 | 1148.403 |
| 1148.403 | 16.7     | 1148.403 | 17.20451 | 1148.403 | 16.99374 | 1148.403 | 17.18    | 1148.403 |
| 1148.403 | 16.70377 | 1148.403 | 17.21    | 1148.403 | 17       | 1148.403 | 17.18651 | 1148.403 |
| 1148.403 | 16.71    | 1148.403 | 17.21451 | 1148.403 | 17.00374 | 1148.403 | 17.19    | 1148.403 |
| 1148.403 | 16.71377 | 1148.403 | 17.22    | 1148.403 | 17.01    | 1148.403 | 17.19651 | 1148.403 |
| 1148.403 | 16.72    | 1148.403 | 17.22451 | 1148.403 | 17.01374 | 1148.403 | 17.2     | 1148.403 |
| 1148.403 | 16.72377 | 1148.403 | 17.23    | 1148.403 | 17.02    | 1148.403 | 17.20651 | 1148.403 |
| 1148.403 | 16.73    | 1148.403 | 17.23451 | 1148.403 | 17.02374 | 1148.403 | 17.21    | 1148.403 |
| 1148.403 | 16.73377 | 1148.403 | 17.24    | 1148.403 | 17.03    | 1148.403 | 17.21651 | 1148.403 |
| 1148.403 | 16.74    | 1148.403 | 17.24451 | 1148.403 | 17.03374 | 1148.403 | 17.22    | 1148.403 |
| 1148.403 | 16.74377 | 1148.403 | 17.25    | 1148.403 | 17.04    | 1148.403 | 17.22651 | 1148.403 |

|          |          |          |          |          |          |          |          |          |
|----------|----------|----------|----------|----------|----------|----------|----------|----------|
| 1148.403 | 16.75    | 1148.403 | 17.25451 | 1148.403 | 17.04374 | 1148.403 | 17.23    | 1148.403 |
| 1148.403 | 16.75377 | 1148.403 | 17.26    | 1148.403 | 17.05    | 1148.403 | 17.23651 | 1148.403 |
| 1148.403 | 16.76    | 1148.403 | 17.26451 | 1148.403 | 17.05374 | 1148.403 | 17.24    | 1148.403 |
| 1148.403 | 16.76377 | 1148.403 | 17.27    | 1148.403 | 17.06    | 1148.403 | 17.24651 | 1148.403 |
| 1148.403 | 16.77    | 1148.403 | 17.27451 | 1148.403 | 17.06374 | 1148.403 | 17.25    | 1148.403 |
| 1148.403 | 16.77377 | 1148.403 | 17.28    | 1148.403 | 17.07    | 1148.403 | 17.25651 | 1148.403 |
| 1148.403 | 16.78    | 1148.403 | 17.28451 | 1148.403 | 17.07374 | 1148.403 | 17.26    | 1148.403 |
| 1148.403 | 16.78377 | 1148.403 | 17.29    | 1148.403 | 17.08    | 1148.403 | 17.26651 | 1148.403 |
| 1148.403 | 16.79    | 1148.403 | 17.29451 | 1148.403 | 17.08374 | 1148.403 | 17.27    | 1148.403 |
| 1148.403 | 16.79377 | 1148.403 | 17.3     | 1148.403 | 17.09    | 1148.403 | 17.27651 | 1148.403 |
| 1148.403 | 16.8     | 1148.403 | 17.30451 | 1148.403 | 17.09374 | 1148.403 | 17.28    | 1148.403 |
| 1148.403 | 16.80377 | 1148.403 | 17.31    | 1148.403 | 17.1     | 1148.403 | 17.28651 | 1148.403 |
| 1148.403 | 16.81    | 1148.403 | 17.31451 | 1148.403 | 17.10374 | 1148.403 | 17.29    | 1148.403 |
| 1148.403 | 16.81377 | 1148.403 | 17.32    | 1148.403 | 17.11    | 1148.403 | 17.29651 | 1148.403 |
| 1148.403 | 16.82    | 1148.403 | 17.32451 | 1148.403 | 17.11374 | 1148.403 | 17.3     | 1148.403 |
| 1148.403 | 16.82377 | 1148.403 | 17.33    | 1148.403 | 17.12    | 1148.403 | 17.30651 | 1148.403 |
| 1148.403 | 16.83    | 1148.403 | 17.33451 | 1148.403 | 17.12374 | 1148.403 | 17.31    | 1148.403 |
| 1148.403 | 16.83377 | 1148.403 | 17.34    | 1148.403 | 17.13    | 1148.403 | 17.31651 | 1148.403 |
| 1148.403 | 16.84    | 1148.403 | 17.34451 | 1148.403 | 17.13374 | 1148.403 | 17.32    | 1148.403 |
| 1148.403 | 16.84377 | 1148.403 | 17.35    | 1148.403 | 17.14    | 1148.403 | 17.32651 | 1148.403 |
| 1148.403 | 16.85    | 1148.403 | 17.35451 | 1148.403 | 17.14374 | 1148.403 | 17.33    | 1148.403 |
| 1148.403 | 16.85377 | 1148.403 | 17.36    | 1148.403 | 17.15    | 1148.403 | 17.33651 | 1148.403 |
| 1148.403 | 16.86    | 1148.403 | 17.36451 | 1148.403 | 17.15374 | 1148.403 | 17.34    | 1148.403 |
| 1148.403 | 16.86377 | 1148.403 | 17.37    | 1148.403 | 17.16    | 1148.403 | 17.34651 | 1148.403 |
| 1148.403 | 16.87    | 1148.403 | 17.37451 | 1148.403 | 17.16374 | 1148.403 | 17.35    | 1148.403 |
| 1148.403 | 16.87377 | 1148.403 | 17.38    | 1148.403 | 17.17    | 1148.403 | 17.35651 | 1148.403 |
| 1148.403 | 16.88    | 1148.403 | 17.38451 | 1148.403 | 17.17374 | 1148.403 | 17.36    | 1148.403 |
| 1148.403 | 16.88377 | 1148.403 | 17.39    | 1148.403 | 17.18    | 1148.403 | 17.36651 | 1148.403 |
| 1148.403 | 16.89    | 1148.403 | 17.39451 | 1148.403 | 17.18374 | 1148.403 | 17.37    | 1148.403 |
| 1148.403 | 16.89377 | 1148.403 | 17.4     | 1148.403 | 17.19    | 1148.403 | 17.37651 | 1148.403 |
| 1148.403 | 16.9     | 1148.403 | 17.40451 | 1148.403 | 17.19374 | 1148.403 | 17.38    | 1148.403 |
| 1148.403 | 16.90377 | 1148.403 | 17.41    | 1148.403 | 17.2     | 1148.403 | 17.38651 | 1148.403 |
| 1148.403 | 16.91    | 1148.403 | 17.41451 | 1148.403 | 17.20374 | 1148.403 | 17.39    | 1148.403 |
| 1148.403 | 16.91377 | 1148.403 | 17.42    | 1148.403 | 17.21    | 1148.403 | 17.39651 | 1148.403 |
| 1148.403 | 16.92    | 1148.403 | 17.42451 | 1148.403 | 17.21374 | 1148.403 | 17.4     | 1148.403 |
| 1148.403 | 16.92377 | 1148.403 | 17.43    | 1148.403 | 17.22    | 1148.403 | 17.40651 | 1148.403 |
| 1148.403 | 16.93    | 1148.403 | 17.43451 | 1148.403 | 17.22374 | 1148.403 | 17.41    | 1148.403 |
| 1148.403 | 16.93377 | 1148.403 | 17.44    | 1148.403 | 17.23    | 1148.403 | 17.41651 | 1148.403 |
| 1148.403 | 16.94    | 1148.403 | 17.44451 | 1148.403 | 17.23374 | 1148.403 | 17.42    | 1148.403 |
| 1148.403 | 16.94377 | 1148.403 | 17.45    | 1148.403 | 17.24    | 1148.403 | 17.42651 | 1148.403 |
| 1148.403 | 16.95    | 1148.403 | 17.45451 | 1148.403 | 17.24374 | 1148.403 | 17.43    | 1148.403 |
| 1148.403 | 16.95377 | 1148.403 | 17.46    | 1148.403 | 17.25    | 1148.403 | 17.43651 | 1148.403 |
| 1148.403 | 16.96    | 1148.403 | 17.46451 | 1148.403 | 17.25374 | 1148.403 | 17.44    | 1148.403 |
| 1148.403 | 16.96377 | 1148.403 | 17.47    | 1148.403 | 17.26    | 1148.403 | 17.44651 | 1148.403 |
| 1148.403 | 16.97    | 1148.403 | 17.47451 | 1148.403 | 17.26374 | 1148.403 | 17.45    | 1148.403 |
| 1148.403 | 16.97377 | 1148.403 | 17.48    | 1148.403 | 17.27    | 1148.403 | 17.45651 | 1148.403 |
| 1148.403 | 16.98    | 1148.403 | 17.48451 | 1148.403 | 17.27374 | 1148.403 | 17.46    | 1148.403 |



|          |          |          |          |          |          |          |          |          |
|----------|----------|----------|----------|----------|----------|----------|----------|----------|
| 1148.403 | 16.98377 | 1148.403 | 17.49    | 1148.403 | 17.28    | 1148.403 | 17.46651 | 1148.403 |
| 1148.403 | 16.99    | 1148.403 | 17.49451 | 1148.403 | 17.28374 | 1148.403 | 17.47    | 1148.403 |
| 1148.403 | 16.99377 | 1148.403 | 17.5     | 1148.403 | 17.29    | 1148.403 | 17.47651 | 1148.403 |
| 1148.403 | 17       | 1148.403 | 17.50451 | 1148.403 | 17.29374 | 1148.403 | 17.48    | 1148.403 |
| 1148.403 | 17.00377 | 1148.403 | 17.51    | 1148.403 | 17.3     | 1148.403 | 17.48651 | 1148.403 |
| 1148.403 | 17.01    | 1148.403 | 17.51451 | 1148.403 | 17.30374 | 1148.403 | 17.49    | 1148.403 |
| 1148.403 | 17.01377 | 1148.403 | 17.52    | 1148.403 | 17.31    | 1148.403 | 17.49651 | 1148.403 |
| 1148.403 | 17.02    | 1148.403 | 17.52451 | 1148.403 | 17.31374 | 1148.403 | 17.5     | 1148.403 |
| 1148.403 | 17.02377 | 1148.403 | 17.53    | 1148.403 | 17.32    | 1148.403 | 17.50651 | 1148.403 |
| 1148.403 | 17.03    | 1148.403 | 17.53451 | 1148.403 | 17.32374 | 1148.403 | 17.51    | 1148.403 |
| 1148.403 | 17.03377 | 1148.403 | 17.54    | 1148.403 | 17.33    | 1148.403 | 17.51651 | 1148.403 |
| 1148.403 | 17.04    | 1148.403 | 17.54451 | 1148.403 | 17.33374 | 1148.403 | 17.52    | 1148.403 |
| 1148.403 | 17.04377 | 1148.403 | 17.55    | 1148.403 | 17.34    | 1148.403 | 17.52651 | 1148.403 |
| 1148.403 | 17.05    | 1148.403 | 17.55451 | 1148.403 | 17.34374 | 1148.403 | 17.53    | 1148.403 |
| 1148.403 | 17.05377 | 1148.403 | 17.56    | 1148.403 | 17.35    | 1148.403 | 17.53651 | 1148.403 |
| 1148.403 | 17.06    | 1148.403 | 17.56451 | 1148.403 | 17.35374 | 1148.403 | 17.54    | 1148.403 |
| 1148.403 | 17.06377 | 1148.403 | 17.57    | 1148.403 | 17.36    | 1148.403 | 17.54651 | 1148.403 |
| 1148.403 | 17.07    | 1148.403 | 17.57451 | 1148.403 | 17.36374 | 1148.403 | 17.55    | 1148.403 |
| 1148.403 | 17.07377 | 1148.403 | 17.58    | 1148.403 | 17.37    | 1148.403 | 17.55651 | 1148.403 |
| 1148.403 | 17.08    | 1148.403 | 17.58451 | 1148.403 | 17.37374 | 1148.403 | 17.56    | 1148.403 |
| 1148.403 | 17.08377 | 1148.403 | 17.59    | 1148.403 | 17.38    | 1148.403 | 17.56651 | 1148.403 |
| 1148.403 | 17.09    | 1148.403 | 17.59451 | 1148.403 | 17.38374 | 1148.403 | 17.57    | 1148.403 |
| 1148.403 | 17.09377 | 1148.403 | 17.6     | 1148.403 | 17.39    | 1148.403 | 17.57651 | 1148.403 |
| 1148.403 | 17.1     | 1148.403 | 17.60451 | 1148.403 | 17.39374 | 1148.403 | 17.58    | 1148.403 |
| 1148.403 | 17.10377 | 1148.403 | 17.61    | 1148.403 | 17.4     | 1148.403 | 17.58651 | 1148.403 |
| 1148.403 | 17.11    | 1148.403 | 17.61451 | 1148.403 | 17.40374 | 1148.403 | 17.59    | 1148.403 |
| 1148.403 | 17.11377 | 1148.403 | 17.62    | 1148.403 | 17.41    | 1148.403 | 17.59651 | 1148.403 |
| 1148.403 | 17.12    | 1148.403 | 17.62451 | 1148.403 | 17.41374 | 1148.403 | 17.6     | 1148.403 |
| 1148.403 | 17.12377 | 1148.403 | 17.63    | 1148.403 | 17.42    | 1148.403 | 17.60651 | 1148.403 |
| 1148.403 | 17.13    | 1148.403 | 17.63451 | 1148.403 | 17.42374 | 1148.403 | 17.61    | 1148.403 |
| 1148.403 | 17.13377 | 1148.403 | 17.64    | 1148.403 | 17.43    | 1148.403 | 17.61651 | 1148.403 |
| 1148.403 | 17.14    | 1148.403 | 17.64451 | 1148.403 | 17.43374 | 1148.403 | 17.62    | 1148.403 |
| 1148.403 | 17.14377 | 1148.403 | 17.65    | 1148.403 | 17.44    | 1148.403 | 17.62651 | 1148.403 |
| 1148.403 | 17.15    | 1148.403 | 17.65451 | 1148.403 | 17.44374 | 1148.403 | 17.63    | 1148.403 |
| 1148.403 | 17.15377 | 1148.403 | 17.66    | 1148.403 | 17.45    | 1148.403 | 17.63651 | 1148.403 |
| 1148.403 | 17.16    | 1148.403 | 17.66451 | 1148.403 | 17.45374 | 1148.403 | 17.64    | 1148.403 |
| 1148.403 | 17.16377 | 1148.403 | 17.67    | 1148.403 | 17.46    | 1148.403 | 17.64651 | 1148.403 |
| 1148.403 | 17.17    | 1148.403 | 17.67451 | 1148.403 | 17.46374 | 1148.403 | 17.65    | 1148.403 |
| 1148.403 | 17.17377 | 1148.403 | 17.68    | 1148.403 | 17.47    | 1148.403 | 17.65651 | 1148.403 |
| 1148.403 | 17.18    | 1148.403 | 17.68451 | 1148.403 | 17.47374 | 1148.403 | 17.66    | 1148.403 |
| 1148.403 | 17.18377 | 1148.403 | 17.69    | 1148.403 | 17.48    | 1148.403 | 17.66651 | 1148.403 |
| 1148.403 | 17.19    | 1148.403 | 17.69451 | 1148.403 | 17.48374 | 1148.403 | 17.67    | 1148.403 |
| 1148.403 | 17.19377 | 1148.403 | 17.7     | 1148.403 | 17.49    | 1148.403 | 17.67651 | 1148.403 |
| 1148.403 | 17.2     | 1148.403 | 17.70451 | 1148.403 | 17.49374 | 1148.403 | 17.68    | 1148.403 |
| 1148.403 | 17.20377 | 1148.403 | 17.71    | 1148.403 | 17.5     | 1148.403 | 17.68651 | 1148.403 |
| 1148.403 | 17.21    | 1148.403 | 17.71451 | 1148.403 | 17.50374 | 1148.403 | 17.69    | 1148.403 |
| 1148.403 | 17.21377 | 1148.403 | 17.72    | 1148.403 | 17.51    | 1148.403 | 17.69651 | 1148.403 |

|          |          |          |          |          |          |          |          |          |
|----------|----------|----------|----------|----------|----------|----------|----------|----------|
| 1148.403 | 17.22    | 1148.403 | 17.72451 | 1148.403 | 17.51374 | 1148.403 | 17.7     | 1148.403 |
| 1148.403 | 17.22377 | 1148.403 | 17.73    | 1148.403 | 17.52    | 1148.403 | 17.70651 | 1148.403 |
| 1148.403 | 17.23    | 1148.403 | 17.73451 | 1148.403 | 17.52374 | 1148.403 | 17.71    | 1148.403 |
| 1148.403 | 17.23377 | 1148.403 | 17.74    | 1148.403 | 17.53    | 1148.403 | 17.71651 | 1148.403 |
| 1148.403 | 17.24    | 1148.403 | 17.74451 | 1148.403 | 17.53374 | 1148.403 | 17.72    | 1148.403 |
| 1148.403 | 17.24377 | 1148.403 | 17.75    | 1148.403 | 17.54    | 1148.403 | 17.72651 | 1148.403 |
| 1148.403 | 17.25    | 1148.403 | 17.75451 | 1148.403 | 17.54374 | 1148.403 | 17.73    | 1148.403 |
| 1148.403 | 17.25377 | 1148.403 | 17.76    | 1148.403 | 17.55    | 1148.403 | 17.73651 | 1148.403 |
| 1148.403 | 17.26    | 1148.403 | 17.76451 | 1148.403 | 17.55374 | 1148.403 | 17.74    | 1148.403 |
| 1148.403 | 17.26377 | 1148.403 | 17.77    | 1148.403 | 17.56    | 1148.403 | 17.74651 | 1148.403 |
| 1148.403 | 17.27    | 1148.403 | 17.77451 | 1148.403 | 17.56374 | 1148.403 | 17.75    | 1148.403 |
| 1148.403 | 17.27377 | 1148.403 | 17.78    | 1148.403 | 17.57    | 1148.403 | 17.75651 | 1148.403 |
| 1148.403 | 17.28    | 1148.403 | 17.78451 | 1148.403 | 17.57374 | 1148.403 | 17.76    | 1148.403 |
| 1148.403 | 17.28377 | 1148.403 | 17.79    | 1148.403 | 17.58    | 1148.403 | 17.76651 | 1148.403 |
| 1148.403 | 17.29    | 1148.403 | 17.79451 | 1148.403 | 17.58374 | 1148.403 | 17.77    | 1148.403 |
| 1148.403 | 17.29377 | 1148.403 | 17.8     | 1148.403 | 17.59    | 1148.403 | 17.77651 | 1148.403 |
| 1148.403 | 17.3     | 1148.403 | 17.80451 | 1148.403 | 17.59374 | 1148.403 | 17.78    | 1148.403 |
| 1148.403 | 17.30377 | 1148.403 | 17.81    | 1148.403 | 17.6     | 1148.403 | 17.78651 | 1148.403 |
| 1148.403 | 17.31    | 1148.403 | 17.81451 | 1148.403 | 17.60374 | 1148.403 | 17.79    | 1148.403 |
| 1148.403 | 17.31377 | 1148.403 | 17.82    | 1148.403 | 17.61    | 1148.403 | 17.79651 | 1148.403 |
| 1148.403 | 17.32    | 1148.403 | 17.82451 | 1148.403 | 17.61374 | 1148.403 | 17.8     | 1148.403 |
| 1148.403 | 17.32377 | 1148.403 | 17.83    | 1148.403 | 17.62    | 1148.403 | 17.80651 | 1148.403 |
| 1148.403 | 17.33    | 1148.403 | 17.83451 | 1148.403 | 17.62374 | 1148.403 | 17.81    | 1148.403 |
| 1148.403 | 17.33377 | 1148.403 | 17.84    | 1148.403 | 17.63    | 1148.403 | 17.81651 | 1148.403 |
| 1148.403 | 17.34    | 1148.403 | 17.84451 | 1148.403 | 17.63374 | 1148.403 | 17.82    | 1148.403 |
| 1148.403 | 17.34377 | 1148.403 | 17.85    | 1148.403 | 17.64    | 1148.403 | 17.82651 | 1148.403 |
| 1148.403 | 17.35    | 1148.403 | 17.85451 | 1148.403 | 17.64374 | 1148.403 | 17.83    | 1148.403 |
| 1148.403 | 17.35377 | 1148.403 | 17.86    | 1148.403 | 17.65    | 1148.403 | 17.83651 | 1148.403 |
| 1148.403 | 17.36    | 1148.403 | 17.86451 | 1148.403 | 17.65374 | 1148.403 | 17.84    | 1148.403 |
| 1148.403 | 17.36377 | 1148.403 | 17.87    | 1148.403 | 17.66    | 1148.403 | 17.84651 | 1148.403 |
| 1148.403 | 17.37    | 1148.403 | 17.87451 | 1148.403 | 17.66374 | 1148.403 | 17.85    | 1148.403 |
| 1148.403 | 17.37377 | 1148.403 | 17.88    | 1148.403 | 17.67    | 1148.403 | 17.85651 | 1148.403 |
| 1148.403 | 17.38    | 1148.403 | 17.88451 | 1148.403 | 17.67374 | 1148.403 | 17.86    | 1148.403 |
| 1148.403 | 17.38377 | 1148.403 | 17.89    | 1148.403 | 17.68    | 1148.403 | 17.86651 | 1148.403 |
| 1148.403 | 17.39    | 1148.403 | 17.89451 | 1148.403 | 17.68374 | 1148.403 | 17.87    | 1148.403 |
| 1148.403 | 17.39377 | 1148.403 | 17.9     | 1148.403 | 17.69    | 1148.403 | 17.87651 | 1148.403 |
| 1148.403 | 17.4     | 1148.403 | 17.90451 | 1148.403 | 17.69374 | 1148.403 | 17.88    | 1148.403 |
| 1148.403 | 17.40377 | 1148.403 | 17.91    | 1148.403 | 17.7     | 1148.403 | 17.88651 | 1148.403 |
| 1148.403 | 17.41    | 1148.403 | 17.91451 | 1148.403 | 17.70374 | 1148.403 | 17.89    | 1148.403 |
| 1148.403 | 17.41377 | 1148.403 | 17.92    | 1148.403 | 17.71    | 1148.403 | 17.89651 | 1148.403 |
| 1148.403 | 17.42    | 1148.403 | 17.92451 | 1148.403 | 17.71374 | 1148.403 | 17.9     | 1148.403 |
| 1148.403 | 17.42377 | 1148.403 | 17.93    | 1148.403 | 17.72    | 1148.403 | 17.90651 | 1148.403 |
| 1148.403 | 17.43    | 1148.403 | 17.93451 | 1148.403 | 17.72374 | 1148.403 | 17.91    | 1148.403 |
| 1148.403 | 17.43377 | 1148.403 | 17.94    | 1148.403 | 17.73    | 1148.403 | 17.91651 | 1148.403 |
| 1148.403 | 17.44    | 1148.403 | 17.94451 | 1148.403 | 17.73374 | 1148.403 | 17.92    | 1148.403 |
| 1148.403 | 17.44377 | 1148.403 | 17.95    | 1148.403 | 17.74    | 1148.403 | 17.92651 | 1148.403 |
| 1148.403 | 17.45    | 1148.403 | 17.95451 | 1148.403 | 17.74374 | 1148.403 | 17.93    | 1148.403 |

|          |          |          |          |          |          |          |          |          |
|----------|----------|----------|----------|----------|----------|----------|----------|----------|
| 1148.403 | 17.45377 | 1148.403 | 17.96    | 1148.403 | 17.75    | 1148.403 | 17.93651 | 1148.403 |
| 1148.403 | 17.46    | 1148.403 | 17.96451 | 1148.403 | 17.75374 | 1148.403 | 17.94    | 1148.403 |
| 1148.403 | 17.46377 | 1148.403 | 17.97    | 1148.403 | 17.76    | 1148.403 | 17.94651 | 1148.403 |
| 1148.403 | 17.47    | 1148.403 | 17.97451 | 1148.403 | 17.76374 | 1148.403 | 17.95    | 1148.403 |
| 1148.403 | 17.47377 | 1148.403 | 17.98    | 1148.403 | 17.77    | 1148.403 | 17.95651 | 1148.403 |
| 1148.403 | 17.48    | 1148.403 | 17.98451 | 1148.403 | 17.77374 | 1148.403 | 17.96    | 1148.403 |
| 1148.403 | 17.48377 | 1148.403 | 17.99    | 1148.403 | 17.78    | 1148.403 | 17.96651 | 1148.403 |
| 1148.403 | 17.49    | 1148.403 | 17.99451 | 1148.403 | 17.78374 | 1148.403 | 17.97    | 1148.403 |
| 1148.403 | 17.49377 | 1148.403 | 18       | 1148.403 | 17.79    | 1148.403 | 17.97651 | 1148.403 |
| 1148.403 | 17.5     | 1148.403 | 18.00451 | 1148.403 | 17.79374 | 1148.403 | 17.98    | 1148.403 |
| 1148.403 | 17.50377 | 1148.403 | 18.01    | 1148.403 | 17.8     | 1148.403 | 17.98651 | 1148.403 |
| 1148.403 | 17.51    | 1148.403 | 18.01451 | 1148.403 | 17.80374 | 1148.403 | 17.99    | 1148.403 |
| 1148.403 | 17.51377 | 1148.403 | 18.02    | 1148.403 | 17.81    | 1148.403 | 17.99651 | 1148.403 |
| 1148.403 | 17.52    | 1148.403 | 18.02451 | 1148.403 | 17.81374 | 1148.403 | 18       | 1148.403 |
| 1148.403 | 17.52377 | 1148.403 | 18.03    | 1148.403 | 17.82    | 1148.403 | 18.00651 | 1148.403 |
| 1148.403 | 17.53    | 1148.403 | 18.03451 | 1148.403 | 17.82374 | 1148.403 | 18.01    | 1148.403 |
| 1148.403 | 17.53377 | 1148.403 | 18.04    | 1148.403 | 17.83    | 1148.403 | 18.01651 | 1148.403 |
| 1148.403 | 17.54    | 1148.403 | 18.04451 | 1148.403 | 17.83374 | 1148.403 | 18.02    | 1148.403 |
| 1148.403 | 17.54377 | 1148.403 | 18.05    | 1148.403 | 17.84    | 1148.403 | 18.02651 | 1148.403 |
| 1148.403 | 17.55    | 1148.403 | 18.05451 | 1148.403 | 17.84374 | 1148.403 | 18.03    | 1148.403 |
| 1148.403 | 17.55377 | 1148.403 | 18.06    | 1148.403 | 17.85    | 1148.403 | 18.03651 | 1148.403 |
| 1148.403 | 17.56    | 1148.403 | 18.06451 | 1148.403 | 17.85374 | 1148.403 | 18.04    | 1148.403 |
| 1148.403 | 17.56377 | 1148.403 | 18.07    | 1148.403 | 17.86    | 1148.403 | 18.04651 | 1148.403 |
| 1148.403 | 17.57    | 1148.403 | 18.07451 | 1148.403 | 17.86374 | 1148.403 | 18.05    | 1148.403 |
| 1148.403 | 17.57377 | 1148.403 | 18.08    | 1148.403 | 17.87    | 1148.403 | 18.05651 | 1148.403 |
| 1148.403 | 17.58    | 1148.403 | 18.08451 | 1148.403 | 17.87374 | 1148.403 | 18.06    | 1148.403 |
| 1148.403 | 17.58377 | 1148.403 | 18.09    | 1148.403 | 17.88    | 1148.403 | 18.06651 | 1148.403 |
| 1148.403 | 17.59    | 1148.403 | 18.09451 | 1148.403 | 17.88374 | 1148.403 | 18.07    | 1148.403 |
| 1148.403 | 17.59377 | 1148.403 | 18.1     | 1148.403 | 17.89    | 1148.403 | 18.07651 | 1148.403 |
| 1148.403 | 17.6     | 1148.403 | 18.10451 | 1148.403 | 17.89374 | 1148.403 | 18.08    | 1148.403 |
| 1148.403 | 17.60377 | 1148.403 | 18.11    | 1148.403 | 17.9     | 1148.403 | 18.08651 | 1148.403 |
| 1148.403 | 17.61    | 1148.403 | 18.11451 | 1148.403 | 17.90374 | 1148.403 | 18.09    | 1148.403 |
| 1148.403 | 17.61377 | 1148.403 | 18.12    | 1148.403 | 17.91    | 1148.403 | 18.09651 | 1148.403 |
| 1148.403 | 17.62    | 1148.403 | 18.12451 | 1148.403 | 17.91374 | 1148.403 | 18.1     | 1148.403 |
| 1148.403 | 17.62377 | 1148.403 | 18.13    | 1148.403 | 17.92    | 1148.403 | 18.10651 | 1148.403 |
| 1148.403 | 17.63    | 1148.403 | 18.13451 | 1148.403 | 17.92374 | 1148.403 | 18.11    | 1148.403 |
| 1148.403 | 17.63377 | 1148.403 | 18.14    | 1148.403 | 17.93    | 1148.403 | 18.11651 | 1148.403 |
| 1148.403 | 17.64    | 1148.403 | 18.14451 | 1148.403 | 17.93374 | 1148.403 | 18.12    | 1148.403 |
| 1148.403 | 17.64377 | 1148.403 | 18.15    | 1148.403 | 17.94    | 1148.403 | 18.12651 | 1148.403 |
| 1148.403 | 17.65    | 1148.403 | 18.15451 | 1148.403 | 17.94374 | 1148.403 | 18.13    | 1148.403 |
| 1148.403 | 17.65377 | 1148.403 | 18.16    | 1148.403 | 17.95    | 1148.403 | 18.13651 | 1148.403 |
| 1148.403 | 17.66    | 1148.403 | 18.16451 | 1148.403 | 17.95374 | 1148.403 | 18.14    | 1148.403 |
| 1148.403 | 17.66377 | 1148.403 | 18.17    | 1148.403 | 17.96    | 1148.403 | 18.14651 | 1148.403 |
| 1148.403 | 17.67    | 1148.403 | 18.17451 | 1148.403 | 17.96374 | 1148.403 | 18.15    | 1148.403 |
| 1148.403 | 17.67377 | 1148.403 | 18.18    | 1148.403 | 17.97    | 1148.403 | 18.15651 | 1148.403 |
| 1148.403 | 17.68    | 1148.403 | 18.18451 | 1148.403 | 17.97374 | 1148.403 | 18.16    | 1148.403 |
| 1148.403 | 17.68377 | 1148.403 | 18.19    | 1148.403 | 17.98    | 1148.403 | 18.16651 | 1148.403 |

|          |          |          |          |          |          |          |          |          |
|----------|----------|----------|----------|----------|----------|----------|----------|----------|
| 1148.403 | 17.69    | 1148.403 | 18.19451 | 1148.403 | 17.98374 | 1148.403 | 18.17    | 1148.403 |
| 1148.403 | 17.69377 | 1148.403 | 18.2     | 1148.403 | 17.99    | 1148.403 | 18.17651 | 1148.403 |
| 1148.403 | 17.7     | 1148.403 | 18.20451 | 1148.403 | 17.99374 | 1148.403 | 18.18    | 1148.403 |
| 1148.403 | 17.70377 | 1148.403 | 18.21    | 1148.403 | 18       | 1148.403 | 18.18651 | 1148.403 |
| 1148.403 | 17.71    | 1148.403 | 18.21451 | 1148.403 | 18.00374 | 1148.403 | 18.19    | 1148.403 |
| 1148.403 | 17.71377 | 1148.403 | 18.22    | 1148.403 | 18.01    | 1148.403 | 18.19651 | 1148.403 |
| 1148.403 | 17.72    | 1148.403 | 18.22451 | 1148.403 | 18.01374 | 1148.403 | 18.2     | 1148.403 |
| 1148.403 | 17.72377 | 1148.403 | 18.23    | 1148.403 | 18.02    | 1148.403 | 18.20651 | 1148.403 |
| 1148.403 | 17.73    | 1148.403 | 18.23451 | 1148.403 | 18.02374 | 1148.403 | 18.21    | 1148.403 |
| 1148.403 | 17.73377 | 1148.403 | 18.24    | 1148.403 | 18.03    | 1148.403 | 18.21651 | 1148.403 |
| 1148.403 | 17.74    | 1148.403 | 18.24451 | 1148.403 | 18.03374 | 1148.403 | 18.22    | 1148.403 |
| 1148.403 | 17.74377 | 1148.403 | 18.25    | 1148.403 | 18.04    | 1148.403 | 18.22651 | 1148.403 |
| 1148.403 | 17.75    | 1148.403 | 18.25451 | 1148.403 | 18.04374 | 1148.403 | 18.23    | 1148.403 |
| 1148.403 | 17.75377 | 1148.403 | 18.26    | 1148.403 | 18.05    | 1148.403 | 18.23651 | 1148.403 |
| 1148.403 | 17.76    | 1148.403 | 18.26451 | 1148.403 | 18.05374 | 1148.403 | 18.24    | 1148.403 |
| 1148.403 | 17.76377 | 1148.403 | 18.27    | 1148.403 | 18.06    | 1148.403 | 18.24651 | 1148.403 |
| 1148.403 | 17.77    | 1148.403 | 18.27451 | 1148.403 | 18.06374 | 1148.403 | 18.25    | 1148.403 |
| 1148.403 | 17.77377 | 1148.403 | 18.28    | 1148.403 | 18.07    | 1148.403 | 18.25651 | 1148.403 |
| 1148.403 | 17.78    | 1148.403 | 18.28451 | 1148.403 | 18.07374 | 1148.403 | 18.26    | 1148.403 |
| 1148.403 | 17.78377 | 1148.403 | 18.29    | 1148.403 | 18.08    | 1148.403 | 18.26651 | 1148.403 |
| 1148.403 | 17.79    | 1148.403 | 18.29451 | 1148.403 | 18.08374 | 1148.403 | 18.27    | 1148.403 |
| 1148.403 | 17.79377 | 1148.403 | 18.3     | 1148.403 | 18.09    | 1148.403 | 18.27651 | 1148.403 |
| 1148.403 | 17.8     | 1148.403 | 18.30451 | 1148.403 | 18.09374 | 1148.403 | 18.28    | 1148.403 |
| 1148.403 | 17.80377 | 1148.403 | 18.31    | 1148.403 | 18.1     | 1148.403 | 18.28651 | 1148.403 |
| 1148.403 | 17.81    | 1148.403 | 18.31451 | 1148.403 | 18.10374 | 1148.403 | 18.29    | 1148.403 |
| 1148.403 | 17.81377 | 1148.403 | 18.32    | 1148.403 | 18.11    | 1148.403 | 18.29651 | 1148.403 |
| 1148.403 | 17.82    | 1148.403 | 18.32451 | 1148.403 | 18.11374 | 1148.403 | 18.3     | 1148.403 |
| 1148.403 | 17.82377 | 1148.403 | 18.33    | 1148.403 | 18.12    | 1148.403 | 18.30651 | 1148.403 |
| 1148.403 | 17.83    | 1148.403 | 18.33451 | 1148.403 | 18.12374 | 1148.403 | 18.31    | 1148.403 |
| 1148.403 | 17.83377 | 1148.403 | 18.34    | 1148.403 | 18.13    | 1148.403 | 18.31651 | 1148.403 |
| 1148.403 | 17.84    | 1148.403 | 18.34451 | 1148.403 | 18.13374 | 1148.403 | 18.32    | 1148.403 |
| 1148.403 | 17.84377 | 1148.403 | 18.35    | 1148.403 | 18.14    | 1148.403 | 18.32651 | 1148.403 |
| 1148.403 | 17.85    | 1148.403 | 18.35451 | 1148.403 | 18.14374 | 1148.403 | 18.33    | 1148.403 |
| 1148.403 | 17.85377 | 1148.403 | 18.36    | 1148.403 | 18.15    | 1148.403 | 18.33651 | 1148.403 |
| 1148.403 | 17.86    | 1148.403 | 18.36451 | 1148.403 | 18.15374 | 1148.403 | 18.34    | 1148.403 |
| 1148.403 | 17.86377 | 1148.403 | 18.37    | 1148.403 | 18.16    | 1148.403 | 18.34651 | 1148.403 |
| 1148.403 | 17.87    | 1148.403 | 18.37451 | 1148.403 | 18.16374 | 1148.403 | 18.35    | 1148.403 |
| 1148.403 | 17.87377 | 1148.403 | 18.38    | 1148.403 | 18.17    | 1148.403 | 18.35651 | 1148.403 |
| 1148.403 | 17.88    | 1148.403 | 18.38451 | 1148.403 | 18.17374 | 1148.403 | 18.36    | 1148.403 |
| 1148.403 | 17.88377 | 1148.403 | 18.39    | 1148.403 | 18.18    | 1148.403 | 18.36651 | 1148.403 |
| 1148.403 | 17.89    | 1148.403 | 18.39451 | 1148.403 | 18.18374 | 1148.403 | 18.37    | 1148.403 |
| 1148.403 | 17.89377 | 1148.403 | 18.4     | 1148.403 | 18.19    | 1148.403 | 18.37651 | 1148.403 |
| 1148.403 | 17.9     | 1148.403 | 18.40451 | 1148.403 | 18.19374 | 1148.403 | 18.38    | 1148.403 |
| 1148.403 | 17.90377 | 1148.403 | 18.41    | 1148.403 | 18.2     | 1148.403 | 18.38651 | 1148.403 |
| 1148.403 | 17.91    | 1148.403 | 18.41451 | 1148.403 | 18.20374 | 1148.403 | 18.39    | 1148.403 |
| 1148.403 | 17.91377 | 1148.403 | 18.42    | 1148.403 | 18.21    | 1148.403 | 18.39651 | 1148.403 |
| 1148.403 | 17.92    | 1148.403 | 18.42451 | 1148.403 | 18.21374 | 1148.403 | 18.4     | 1148.403 |

|          |          |          |          |          |          |          |          |          |
|----------|----------|----------|----------|----------|----------|----------|----------|----------|
| 1148.403 | 17.92377 | 1148.403 | 18.43    | 1148.403 | 18.22    | 1148.403 | 18.40651 | 1148.403 |
| 1148.403 | 17.93    | 1148.403 | 18.43451 | 1148.403 | 18.22374 | 1148.403 | 18.41    | 1148.403 |
| 1148.403 | 17.93377 | 1148.403 | 18.44    | 1148.403 | 18.23    | 1148.403 | 18.41651 | 1148.403 |
| 1148.403 | 17.94    | 1148.403 | 18.44451 | 1148.403 | 18.23374 | 1148.403 | 18.42    | 1148.403 |
| 1148.403 | 17.94377 | 1148.403 | 18.45    | 1148.403 | 18.24    | 1148.403 | 18.42651 | 1148.403 |
| 1148.403 | 17.95    | 1148.403 | 18.45451 | 1148.403 | 18.24374 | 1148.403 | 18.43    | 1148.403 |
| 1148.403 | 17.95377 | 1148.403 | 18.46    | 1148.403 | 18.25    | 1148.403 | 18.43651 | 1148.403 |
| 1148.403 | 17.96    | 1148.403 | 18.46451 | 1148.403 | 18.25374 | 1148.403 | 18.44    | 1148.403 |
| 1148.403 | 17.96377 | 1148.403 | 18.47    | 1148.403 | 18.26    | 1148.403 | 18.44651 | 1148.403 |
| 1148.403 | 17.97    | 1148.403 | 18.47451 | 1148.403 | 18.26374 | 1148.403 | 18.45    | 1148.403 |
| 1148.403 | 17.97377 | 1148.403 | 18.48    | 1148.403 | 18.27    | 1148.403 | 18.45651 | 1148.403 |
| 1148.403 | 17.98    | 1148.403 | 18.48451 | 1148.403 | 18.27374 | 1148.403 | 18.46    | 1148.403 |
| 1148.403 | 17.98377 | 1148.403 | 18.49    | 1148.403 | 18.28    | 1148.403 | 18.46651 | 1148.403 |
| 1148.403 | 17.99    | 1148.403 | 18.49451 | 1148.403 | 18.28374 | 1148.403 | 18.47    | 1148.403 |
| 1148.403 | 17.99377 | 1148.403 | 18.5     | 1148.403 | 18.29    | 1148.403 | 18.47651 | 1148.403 |
| 1148.403 | 18       | 1148.403 | 18.50451 | 1148.403 | 18.29374 | 1148.403 | 18.48    | 1148.403 |
| 1148.403 | 18.00377 | 1148.403 | 18.51    | 1148.403 | 18.3     | 1148.403 | 18.48651 | 1148.403 |
| 1148.403 | 18.01    | 1148.403 | 18.51451 | 1148.403 | 18.30374 | 1148.403 | 18.49    | 1148.403 |
| 1148.403 | 18.01377 | 1148.403 | 18.52    | 1148.403 | 18.31    | 1148.403 | 18.49651 | 1148.403 |
| 1148.403 | 18.02    | 1148.403 | 18.52451 | 1148.403 | 18.31374 | 1148.403 | 18.5     | 1148.403 |
| 1148.403 | 18.02377 | 1148.403 | 18.53    | 1148.403 | 18.32    | 1148.403 | 18.50651 | 1148.403 |
| 1148.403 | 18.03    | 1148.403 | 18.53451 | 1148.403 | 18.32374 | 1148.403 | 18.51    | 1148.403 |
| 1148.403 | 18.03377 | 1148.403 | 18.54    | 1148.403 | 18.33    | 1148.403 | 18.51651 | 1148.403 |
| 1148.403 | 18.04    | 1148.403 | 18.54451 | 1148.403 | 18.33374 | 1148.403 | 18.52    | 1148.403 |
| 1148.403 | 18.04377 | 1148.403 | 18.55    | 1148.403 | 18.34    | 1148.403 | 18.52651 | 1148.403 |
| 1148.403 | 18.05    | 1148.403 | 18.55451 | 1148.403 | 18.34374 | 1148.403 | 18.53    | 1148.403 |
| 1148.403 | 18.05377 | 1148.403 | 18.56    | 1148.403 | 18.35    | 1148.403 | 18.53651 | 1148.403 |
| 1148.403 | 18.06    | 1148.403 | 18.56451 | 1148.403 | 18.35374 | 1148.403 | 18.54    | 1148.403 |
| 1148.403 | 18.06377 | 1148.403 | 18.57    | 1148.403 | 18.36    | 1148.403 | 18.54651 | 1148.403 |
| 1148.403 | 18.07    | 1148.403 | 18.57451 | 1148.403 | 18.36374 | 1148.403 | 18.55    | 1148.403 |
| 1148.403 | 18.07377 | 1148.403 | 18.58    | 1148.403 | 18.37    | 1148.403 | 18.55651 | 1148.403 |
| 1148.403 | 18.08    | 1148.403 | 18.58451 | 1148.403 | 18.37374 | 1148.403 | 18.56    | 1148.403 |
| 1148.403 | 18.08377 | 1148.403 | 18.59    | 1148.403 | 18.38    | 1148.403 | 18.56651 | 1148.403 |
| 1148.403 | 18.09    | 1148.403 | 18.59451 | 1148.403 | 18.38374 | 1148.403 | 18.57    | 1148.403 |
| 1148.403 | 18.09377 | 1148.403 | 18.6     | 1148.403 | 18.39    | 1148.403 | 18.57651 | 1148.403 |
| 1148.403 | 18.1     | 1148.403 | 18.60451 | 1148.403 | 18.39374 | 1148.403 | 18.58    | 1148.403 |
| 1148.403 | 18.10377 | 1148.403 | 18.61    | 1148.403 | 18.4     | 1148.403 | 18.58651 | 1148.403 |
| 1148.403 | 18.11    | 1148.403 | 18.61451 | 1148.403 | 18.40374 | 1148.403 | 18.59    | 1148.403 |
| 1148.403 | 18.11377 | 1148.403 | 18.62    | 1148.403 | 18.41    | 1148.403 | 18.59651 | 1148.403 |
| 1148.403 | 18.12    | 1148.403 | 18.62451 | 1148.403 | 18.41374 | 1148.403 | 18.6     | 1148.403 |
| 1148.403 | 18.12377 | 1148.403 | 18.63    | 1148.403 | 18.42    | 1148.403 | 18.60651 | 1148.403 |
| 1148.403 | 18.13    | 1148.403 | 18.63451 | 1148.403 | 18.42374 | 1148.403 | 18.61    | 1148.403 |
| 1148.403 | 18.13377 | 1148.403 | 18.64    | 1148.403 | 18.43    | 1148.403 | 18.61651 | 1148.403 |
| 1148.403 | 18.14    | 1148.403 | 18.64451 | 1148.403 | 18.43374 | 1148.403 | 18.62    | 1148.403 |
| 1148.403 | 18.14377 | 1148.403 | 18.65    | 1148.403 | 18.44    | 1148.403 | 18.62651 | 1148.403 |
| 1148.403 | 18.15    | 1148.403 | 18.65451 | 1148.403 | 18.44374 | 1148.403 | 18.63    | 1148.403 |
| 1148.403 | 18.15377 | 1148.403 | 18.66    | 1148.403 | 18.45    | 1148.403 | 18.63651 | 1148.403 |

|          |          |          |          |          |          |          |          |          |
|----------|----------|----------|----------|----------|----------|----------|----------|----------|
| 1148.403 | 18.16    | 1148.403 | 18.66451 | 1148.403 | 18.45374 | 1148.403 | 18.64    | 1148.403 |
| 1148.403 | 18.16377 | 1148.403 | 18.67    | 1148.403 | 18.46    | 1148.403 | 18.64651 | 1148.403 |
| 1148.403 | 18.17    | 1148.403 | 18.67451 | 1148.403 | 18.46374 | 1148.403 | 18.65    | 1148.403 |
| 1148.403 | 18.17377 | 1148.403 | 18.68    | 1148.403 | 18.47    | 1148.403 | 18.65651 | 1148.403 |
| 1148.403 | 18.18    | 1148.403 | 18.68451 | 1148.403 | 18.47374 | 1148.403 | 18.66    | 1148.403 |
| 1148.403 | 18.18377 | 1148.403 | 18.69    | 1148.403 | 18.48    | 1148.403 | 18.66651 | 1148.403 |
| 1148.403 | 18.19    | 1148.403 | 18.69451 | 1148.403 | 18.48374 | 1148.403 | 18.67    | 1148.403 |
| 1148.403 | 18.19377 | 1148.403 | 18.7     | 1148.403 | 18.49    | 1148.403 | 18.67651 | 1148.403 |
| 1148.403 | 18.2     | 1148.403 | 18.70451 | 1148.403 | 18.49374 | 1148.403 | 18.68    | 1148.403 |
| 1148.403 | 18.20377 | 1148.403 | 18.71    | 1148.403 | 18.5     | 1148.403 | 18.68651 | 1148.403 |
| 1148.403 | 18.21    | 1148.403 | 18.71451 | 1148.403 | 18.50374 | 1148.403 | 18.69    | 1148.403 |
| 1148.403 | 18.21377 | 1148.403 | 18.72    | 1148.403 | 18.51    | 1148.403 | 18.69651 | 1148.403 |
| 1148.403 | 18.22    | 1148.403 | 18.72451 | 1148.403 | 18.51374 | 1148.403 | 18.7     | 1148.403 |
| 1148.403 | 18.22377 | 1148.403 | 18.73    | 1148.403 | 18.52    | 1148.403 | 18.70651 | 1148.403 |
| 1148.403 | 18.23    | 1148.403 | 18.73451 | 1148.403 | 18.52374 | 1148.403 | 18.71    | 1148.403 |
| 1148.403 | 18.23377 | 1148.403 | 18.74    | 1148.403 | 18.53    | 1148.403 | 18.71651 | 1148.403 |
| 1148.403 | 18.24    | 1148.403 | 18.74451 | 1148.403 | 18.53374 | 1148.403 | 18.72    | 1148.403 |
| 1148.403 | 18.24377 | 1148.403 | 18.75    | 1148.403 | 18.54    | 1148.403 | 18.72651 | 1148.403 |
| 1148.403 | 18.25    | 1148.403 | 18.75451 | 1148.403 | 18.54374 | 1148.403 | 18.73    | 1148.403 |
| 1148.403 | 18.25377 | 1148.403 | 18.76    | 1148.403 | 18.55    | 1148.403 | 18.73651 | 1148.403 |
| 1148.403 | 18.26    | 1148.403 | 18.76451 | 1148.403 | 18.55374 | 1148.403 | 18.74    | 1148.403 |
| 1148.403 | 18.26377 | 1148.403 | 18.77    | 1148.403 | 18.56    | 1148.403 | 18.74651 | 1148.403 |
| 1148.403 | 18.27    | 1148.403 | 18.77451 | 1148.403 | 18.56374 | 1148.403 | 18.75    | 1148.403 |
| 1148.403 | 18.27377 | 1148.403 | 18.78    | 1148.403 | 18.57    | 1148.403 | 18.75651 | 1148.403 |
| 1148.403 | 18.28    | 1148.403 | 18.78627 | 1148.403 | 18.57374 | 1148.403 | 18.76    | 1148.403 |
| 1148.403 | 18.28377 | 1148.403 | 18.79    | 1148.403 | 18.58    | 1148.403 | 18.76651 | 1148.403 |
| 1148.403 | 18.29    | 1148.403 | 18.79616 | 1148.403 | 18.58374 | 1148.403 | 18.77    | 1148.403 |
| 1148.403 | 18.29377 | 1148.403 | 18.8     | 1148.403 | 18.59    | 1148.403 | 18.77651 | 1148.403 |
| 1148.403 | 18.3     | 1148.403 | 18.80616 | 1148.403 | 18.59374 | 1148.403 | 18.78    | 1148.403 |
| 1148.403 | 18.30377 | 1148.403 | 18.80925 | 1148.403 | 18.6     | 1148.403 | 18.78651 | 1148.403 |
| 1148.403 | 18.31    | 1148.403 | 18.81039 | 1148.403 | 18.60374 | 1148.403 | 18.79    | 1148.403 |
| 1148.403 | 18.31377 | 1148.403 | 18.81309 | 1148.403 | 18.61    | 1148.403 | 18.79651 | 1148.403 |
| 1148.403 | 18.32    | 1148.403 | 18.82    | 1148.403 | 18.61374 | 1148.403 | 18.8     | 1148.403 |
| 1148.403 | 18.32377 | 1148.403 | 18.82309 | 1148.403 | 18.62    | 1148.403 | 18.80651 | 1148.403 |
| 1148.403 | 18.33    | 1148.403 | 18.83    | 1148.403 | 18.62374 | 1148.403 | 18.81    | 1148.403 |
| 1148.403 | 18.33377 | 1148.403 | 18.83309 | 1148.403 | 18.63    | 1148.403 | 18.81651 | 1148.403 |
| 1148.403 | 18.34    | 1148.403 | 18.84    | 1148.403 | 18.63374 | 1148.403 | 18.82    | 1148.403 |
| 1148.403 | 18.34377 | 1148.403 | 18.84309 | 1148.403 | 18.64    | 1148.403 | 18.82651 | 1148.403 |
| 1148.403 | 18.35    | 1148.403 | 18.85    | 1148.403 | 18.64374 | 1148.403 | 18.83    | 1148.403 |
| 1148.403 | 18.35377 | 1148.403 | 18.85309 | 1148.403 | 18.65    | 1148.403 | 18.83651 | 1148.403 |
| 1148.403 | 18.36    | 1148.403 | 18.86    | 1148.403 | 18.65374 | 1148.403 | 18.84    | 1148.403 |
| 1148.403 | 18.36377 | 1148.403 | 18.86309 | 1148.403 | 18.66    | 1148.403 | 18.84651 | 1148.403 |
| 1148.403 | 18.37    | 1148.403 | 18.87    | 1148.403 | 18.66374 | 1148.403 | 18.85    | 1148.403 |
| 1148.403 | 18.37377 | 1148.403 | 18.87309 | 1148.403 | 18.67    | 1148.403 | 18.85651 | 1148.403 |
| 1148.403 | 18.38    | 1148.403 | 18.88    | 1148.403 | 18.67374 | 1148.403 | 18.86    | 1148.403 |
| 1148.403 | 18.38377 | 1148.403 | 18.88309 | 1148.403 | 18.68    | 1148.403 | 18.86651 | 1148.403 |
| 1148.403 | 18.39    | 1148.403 | 18.89    | 1148.403 | 18.68374 | 1148.403 | 18.87    | 1148.403 |

|          |          |          |          |          |          |          |          |          |
|----------|----------|----------|----------|----------|----------|----------|----------|----------|
| 1148.403 | 18.39377 | 1148.403 | 18.89309 | 1148.403 | 18.69    | 1148.403 | 18.87651 | 1148.403 |
| 1148.403 | 18.4     | 1148.403 | 18.9     | 1148.403 | 18.69374 | 1148.403 | 18.88    | 1148.403 |
| 1148.403 | 18.40377 | 1148.403 | 18.90309 | 1148.403 | 18.7     | 1148.403 | 18.88651 | 1148.403 |
| 1148.403 | 18.41    | 1148.403 | 18.91    | 1148.403 | 18.70374 | 1148.403 | 18.89    | 1148.403 |
| 1148.403 | 18.41377 | 1148.403 | 18.91309 | 1148.403 | 18.71    | 1148.403 | 18.89651 | 1148.403 |
| 1148.403 | 18.42    | 1148.403 | 18.92    | 1148.403 | 18.71374 | 1148.403 | 18.9     | 1148.403 |
| 1148.403 | 18.42377 | 1148.403 | 18.92309 | 1148.403 | 18.72    | 1148.403 | 18.90651 | 1148.403 |
| 1148.403 | 18.43    | 1148.403 | 18.93    | 1148.403 | 18.72374 | 1148.403 | 18.91    | 1148.403 |
| 1148.403 | 18.43377 | 1148.403 | 18.93309 | 1148.403 | 18.73    | 1148.403 | 18.91651 | 1148.403 |
| 1148.403 | 18.44    | 1148.403 | 18.94    | 1148.403 | 18.73374 | 1148.403 | 18.92    | 1148.403 |
| 1148.403 | 18.44377 | 1148.403 | 18.94309 | 1148.403 | 18.74    | 1148.403 | 18.92651 | 1148.403 |
| 1148.403 | 18.45    | 1148.403 | 18.95    | 1148.403 | 18.74374 | 1148.403 | 18.93    | 1148.403 |
| 1148.403 | 18.45377 | 1148.403 | 18.95309 | 1148.403 | 18.74513 | 1148.403 | 18.93651 | 1148.403 |
| 1148.403 | 18.46    | 1148.403 | 18.96    | 1148.403 | 18.75    | 1148.403 | 18.94    | 1148.403 |
| 1148.403 | 18.46377 | 1148.403 | 18.96309 | 1148.403 | 18.75159 | 1148.403 | 18.94651 | 1148.403 |
| 1148.403 | 18.47    | 1148.403 | 18.97    | 1148.403 | 18.76    | 1148.403 | 18.95    | 1148.403 |
| 1148.403 | 18.47377 | 1148.403 | 18.97309 | 1148.403 | 18.76159 | 1148.403 | 18.95651 | 1148.403 |
| 1148.403 | 18.48    | 1148.403 | 18.98    | 1148.403 | 18.77    | 1148.403 | 18.96    | 1148.403 |
| 1148.403 | 18.48377 | 1148.403 | 18.98309 | 1148.403 | 18.77159 | 1148.403 | 18.96651 | 1148.403 |
| 1148.403 | 18.49    | 1148.403 | 18.99    | 1148.403 | 18.78    | 1148.403 | 18.97    | 1148.403 |
| 1148.403 | 18.49377 | 1148.403 | 18.99309 | 1148.403 | 18.78159 | 1148.403 | 18.97651 | 1148.403 |
| 1148.403 | 18.5     | 1148.403 | 19       | 1148.403 | 18.79    | 1148.403 | 18.98    | 1148.403 |
| 1148.403 | 18.50377 | 1148.403 | 19.00309 | 1148.403 | 18.79159 | 1148.403 | 18.98651 | 1148.403 |
| 1148.403 | 18.51    | 1148.403 | 19.01    | 1148.403 | 18.8     | 1148.403 | 18.99    | 1148.403 |
| 1148.403 | 18.51377 | 1148.403 | 19.01309 | 1148.403 | 18.80159 | 1148.403 | 18.99651 | 1148.403 |
| 1148.403 | 18.52    | 1148.403 | 19.02    | 1148.403 | 18.80314 | 1148.403 | 19       | 1148.403 |
| 1148.403 | 18.52377 | 1148.403 | 19.02309 | 1148.403 | 18.81    | 1148.403 | 19.00651 | 1148.403 |
| 1148.403 | 18.53    | 1148.403 | 19.03    | 1148.403 | 18.81177 | 1148.403 | 19.01    | 1148.403 |
| 1148.403 | 18.53377 | 1148.403 | 19.03309 | 1148.403 | 18.82    | 1148.403 | 19.01651 | 1148.403 |
| 1148.403 | 18.54    | 1148.403 | 19.04    | 1148.403 | 18.82177 | 1148.403 | 19.02    | 1148.403 |
| 1148.403 | 18.54377 | 1148.403 | 19.04309 | 1148.403 | 18.83    | 1148.403 | 19.02651 | 1148.403 |
| 1148.403 | 18.55    | 1148.403 | 19.05    | 1148.403 | 18.83177 | 1148.403 | 19.03    | 1148.403 |
| 1148.403 | 18.55377 | 1148.403 | 19.05309 | 1148.403 | 18.84    | 1148.403 | 19.03651 | 1148.403 |
| 1148.403 | 18.56    | 1148.403 | 19.06    | 1148.403 | 18.84177 | 1148.403 | 19.04    | 1148.403 |
| 1148.403 | 18.56377 | 1148.403 | 19.06309 | 1148.403 | 18.85    | 1148.403 | 19.04651 | 1148.403 |
| 1148.403 | 18.57    | 1148.403 | 19.07    | 1148.403 | 18.85177 | 1148.403 | 19.05    | 1148.403 |
| 1148.403 | 18.57377 | 1148.403 | 19.07309 | 1148.403 | 18.86    | 1148.403 | 19.05651 | 1148.403 |
| 1148.403 | 18.58    | 1148.403 | 19.08    | 1148.403 | 18.86177 | 1148.403 | 19.06    | 1148.403 |
| 1148.403 | 18.58377 | 1148.403 | 19.08309 | 1148.403 | 18.87    | 1148.403 | 19.06651 | 1148.403 |
| 1148.403 | 18.59    | 1148.403 | 19.09    | 1148.403 | 18.87177 | 1148.403 | 19.07    | 1148.403 |
| 1148.403 | 18.59377 | 1148.403 | 19.09309 | 1148.403 | 18.88    | 1148.403 | 19.07651 | 1148.403 |
| 1148.403 | 18.6     | 1148.403 | 19.1     | 1148.403 | 18.88177 | 1148.403 | 19.08    | 1148.403 |
| 1148.403 | 18.60377 | 1148.403 | 19.10309 | 1148.403 | 18.89    | 1148.403 | 19.08626 | 1148.403 |
| 1148.403 | 18.61    | 1148.403 | 19.11    | 1148.403 | 18.89177 | 1148.403 | 19.09    | 1148.403 |
| 1148.403 | 18.61377 | 1148.403 | 19.11309 | 1148.403 | 18.9     | 1148.403 | 19.09633 | 1148.403 |
| 1148.403 | 18.62    | 1148.403 | 19.12    | 1148.403 | 18.90177 | 1148.403 | 19.1     | 1148.403 |
| 1148.403 | 18.62377 | 1148.403 | 19.12309 | 1148.403 | 18.91    | 1148.403 | 19.10622 | 1148.403 |

|          |          |          |          |          |          |          |          |          |
|----------|----------|----------|----------|----------|----------|----------|----------|----------|
| 1148.403 | 18.63    | 1148.403 | 19.13    | 1148.403 | 18.91177 | 1148.403 | 19.11    | 1148.403 |
| 1148.403 | 18.63377 | 1148.403 | 19.13309 | 1148.403 | 18.92    | 1148.403 | 19.11622 | 1148.403 |
| 1148.403 | 18.64    | 1148.403 | 19.14    | 1148.403 | 18.92177 | 1148.403 | 19.12    | 1148.403 |
| 1148.403 | 18.64377 | 1148.403 | 19.14309 | 1148.403 | 18.93    | 1148.403 | 19.12622 | 1148.403 |
| 1148.403 | 18.65    | 1148.403 | 19.15    | 1148.403 | 18.93177 | 1148.403 | 19.13    | 1148.403 |
| 1148.403 | 18.65377 | 1148.403 | 19.15309 | 1148.403 | 18.94    | 1148.403 | 19.13622 | 1148.403 |
| 1148.403 | 18.66    | 1148.403 | 19.16    | 1148.403 | 18.94177 | 1148.403 | 19.14    | 1148.403 |
| 1148.403 | 18.66377 | 1148.403 | 19.16309 | 1148.403 | 18.95    | 1148.403 | 19.14622 | 1148.403 |
| 1148.403 | 18.67    | 1148.403 | 19.17    | 1148.403 | 18.95177 | 1148.403 | 19.15    | 1148.403 |
| 1148.403 | 18.67377 | 1148.403 | 19.17309 | 1148.403 | 18.96    | 1148.403 | 19.15622 | 1148.403 |
| 1148.403 | 18.68    | 1148.403 | 19.18    | 1148.403 | 18.96177 | 1148.403 | 19.16    | 1148.403 |
| 1148.403 | 18.68377 | 1148.403 | 19.18309 | 1148.403 | 18.97    | 1148.403 | 19.16622 | 1148.403 |
| 1148.403 | 18.69    | 1148.403 | 19.19    | 1148.403 | 18.97177 | 1148.403 | 19.17    | 1148.403 |
| 1148.403 | 18.69377 | 1148.403 | 19.19309 | 1148.403 | 18.98    | 1148.403 | 19.17622 | 1148.403 |
| 1148.403 | 18.7     | 1148.403 | 19.2     | 1148.403 | 18.98177 | 1148.403 | 19.18    | 1148.403 |
| 1148.403 | 18.70377 | 1148.403 | 19.20309 | 1148.403 | 18.99    | 1148.403 | 19.18622 | 1148.403 |
| 1148.403 | 18.71    | 1148.403 | 19.21    | 1148.403 | 18.99177 | 1148.403 | 19.19    | 1148.403 |
| 1148.403 | 18.71377 | 1148.403 | 19.21309 | 1148.403 | 19       | 1148.403 | 19.19622 | 1148.403 |
| 1148.403 | 18.72    | 1148.403 | 19.22    | 1148.403 | 19.00177 | 1148.403 | 19.2     | 1148.403 |
| 1148.403 | 18.72377 | 1148.403 | 19.22309 | 1148.403 | 19.01    | 1148.403 | 19.20622 | 1148.403 |
| 1148.403 | 18.73    | 1148.403 | 19.23    | 1148.403 | 19.01177 | 1148.403 | 19.21    | 1148.403 |
| 1148.403 | 18.73377 | 1148.403 | 19.23309 | 1148.403 | 19.02    | 1148.403 | 19.21622 | 1148.403 |
| 1148.403 | 18.74    | 1148.403 | 19.24    | 1148.403 | 19.02177 | 1148.403 | 19.22    | 1148.403 |
| 1148.403 | 18.74377 | 1148.403 | 19.24309 | 1148.403 | 19.03    | 1148.403 | 19.22622 | 1148.403 |
| 1148.403 | 18.75    | 1148.403 | 19.25    | 1148.403 | 19.03177 | 1148.403 | 19.23    | 1148.403 |
| 1148.403 | 18.75377 | 1148.403 | 19.25309 | 1148.403 | 19.04    | 1148.403 | 19.23622 | 1148.403 |
| 1148.403 | 18.76    | 1148.403 | 19.26    | 1148.403 | 19.04177 | 1148.403 | 19.24    | 1148.403 |
| 1148.403 | 18.76377 | 1148.403 | 19.26309 | 1148.403 | 19.05    | 1148.403 | 19.24622 | 1148.403 |
| 1148.403 | 18.77    | 1148.403 | 19.27    | 1148.403 | 19.05177 | 1148.403 | 19.25    | 1148.403 |
| 1148.403 | 18.77377 | 1148.403 | 19.27309 | 1148.403 | 19.06    | 1148.403 | 19.25622 | 1148.403 |
| 1148.403 | 18.77514 | 1148.403 | 19.28    | 1148.403 | 19.06177 | 1148.403 | 19.26    | 1148.403 |
| 1148.403 | 18.78    | 1148.403 | 19.28309 | 1148.403 | 19.07    | 1148.403 | 19.26622 | 1148.403 |
| 1148.403 | 18.78156 | 1148.403 | 19.29    | 1148.403 | 19.07177 | 1148.403 | 19.27    | 1148.403 |
| 1148.403 | 18.79    | 1148.403 | 19.29309 | 1148.403 | 19.08    | 1148.403 | 19.27622 | 1148.403 |
| 1148.403 | 18.79156 | 1148.403 | 19.3     | 1148.403 | 19.08177 | 1148.403 | 19.28    | 1148.403 |
| 1148.403 | 18.8     | 1148.403 | 19.30309 | 1148.403 | 19.09    | 1148.403 | 19.28622 | 1148.403 |
| 1148.403 | 18.80156 | 1148.403 | 19.31    | 1148.403 | 19.09177 | 1148.403 | 19.29    | 1148.403 |
| 1148.403 | 18.81    | 1148.403 | 19.31309 | 1148.403 | 19.1     | 1148.403 | 19.29622 | 1148.403 |
| 1148.403 | 18.81156 | 1148.403 | 19.32    | 1148.403 | 19.10177 | 1148.403 | 19.3     | 1148.403 |
| 1148.403 | 18.82    | 1148.403 | 19.32309 | 1148.403 | 19.11    | 1148.403 | 19.30622 | 1148.403 |
| 1148.403 | 18.82156 | 1148.403 | 19.33    | 1148.403 | 19.11177 | 1148.403 | 19.31    | 1148.403 |
| 1148.403 | 18.83    | 1148.403 | 19.33309 | 1148.403 | 19.12    | 1148.403 | 19.31622 | 1148.403 |
| 1148.403 | 18.83156 | 1148.403 | 19.34    | 1148.403 | 19.12177 | 1148.403 | 19.32    | 1148.403 |
| 1148.403 | 18.84    | 1148.403 | 19.34309 | 1148.403 | 19.13    | 1148.403 | 19.32622 | 1148.403 |
| 1148.403 | 18.84156 | 1148.403 | 19.35    | 1148.403 | 19.13177 | 1148.403 | 19.33    | 1148.403 |
| 1148.403 | 18.85    | 1148.403 | 19.35309 | 1148.403 | 19.14    | 1148.403 | 19.33622 | 1148.403 |
| 1148.403 | 18.85156 | 1148.403 | 19.36    | 1148.403 | 19.14177 | 1148.403 | 19.34    | 1148.403 |



|          |          |          |          |          |          |          |          |          |
|----------|----------|----------|----------|----------|----------|----------|----------|----------|
| 1148.403 | 18.86    | 1148.403 | 19.36309 | 1148.403 | 19.15    | 1148.403 | 19.34622 | 1148.403 |
| 1148.403 | 18.86156 | 1148.403 | 19.37    | 1148.403 | 19.15177 | 1148.403 | 19.35    | 1148.403 |
| 1148.403 | 18.87    | 1148.403 | 19.37309 | 1148.403 | 19.16    | 1148.403 | 19.35622 | 1148.403 |
| 1148.403 | 18.87156 | 1148.403 | 19.38    | 1148.403 | 19.16177 | 1148.403 | 19.36    | 1148.403 |
| 1148.403 | 18.88    | 1148.403 | 19.38309 | 1148.403 | 19.17    | 1148.403 | 19.36622 | 1148.403 |
| 1148.403 | 18.88156 | 1148.403 | 19.39    | 1148.403 | 19.17177 | 1148.403 | 19.37    | 1148.403 |
| 1148.403 | 18.89    | 1148.403 | 19.39309 | 1148.403 | 19.18    | 1148.403 | 19.37633 | 1148.403 |
| 1148.403 | 18.89156 | 1148.403 | 19.4     | 1148.403 | 19.18177 | 1148.403 | 19.38    | 1148.403 |
| 1148.403 | 18.9     | 1148.403 | 19.40309 | 1148.403 | 19.19    | 1148.403 | 19.38622 | 1148.403 |
| 1148.403 | 18.90156 | 1148.403 | 19.41    | 1148.403 | 19.19177 | 1148.403 | 19.39    | 1148.403 |
| 1148.403 | 18.91    | 1148.403 | 19.41309 | 1148.403 | 19.2     | 1148.403 | 19.39622 | 1148.403 |
| 1148.403 | 18.91156 | 1148.403 | 19.42    | 1148.403 | 19.20177 | 1148.403 | 19.4     | 1148.403 |
| 1148.403 | 18.92    | 1148.403 | 19.42309 | 1148.403 | 19.21    | 1148.403 | 19.40622 | 1148.403 |
| 1148.403 | 18.92156 | 1148.403 | 19.43    | 1148.403 | 19.21177 | 1148.403 | 19.41    | 1148.403 |
| 1148.403 | 18.93    | 1148.403 | 19.43309 | 1148.403 | 19.22    | 1148.403 | 19.41622 | 1148.403 |
| 1148.403 | 18.93156 | 1148.403 | 19.44    | 1148.403 | 19.22177 | 1148.403 | 19.42    | 1148.403 |
| 1148.403 | 18.94    | 1148.403 | 19.44309 | 1148.403 | 19.23    | 1148.403 | 19.42622 | 1148.403 |
| 1148.403 | 18.94156 | 1148.403 | 19.45    | 1148.403 | 19.23177 | 1148.403 | 19.43    | 1148.403 |
| 1148.403 | 18.95    | 1148.403 | 19.45309 | 1148.403 | 19.24    | 1148.403 | 19.43622 | 1148.403 |
| 1148.403 | 18.95156 | 1148.403 | 19.46    | 1148.403 | 19.24177 | 1148.403 | 19.44    | 1148.403 |
| 1148.403 | 18.96    | 1148.403 | 19.46309 | 1148.403 | 19.25    | 1148.403 | 19.44622 | 1148.403 |
| 1148.403 | 18.96156 | 1148.403 | 19.47    | 1148.403 | 19.25177 | 1148.403 | 19.45    | 1148.403 |
| 1148.403 | 18.97    | 1148.403 | 19.47309 | 1148.403 | 19.26    | 1148.403 | 19.45622 | 1148.403 |
| 1148.403 | 18.97156 | 1148.403 | 19.48    | 1148.403 | 19.26177 | 1148.403 | 19.46    | 1148.403 |
| 1148.403 | 18.98    | 1148.403 | 19.48309 | 1148.403 | 19.27    | 1148.403 | 19.46622 | 1148.403 |
| 1148.403 | 18.98156 | 1148.403 | 19.49    | 1148.403 | 19.27177 | 1148.403 | 19.47    | 1148.403 |
| 1148.403 | 18.99    | 1148.403 | 19.49309 | 1148.403 | 19.28    | 1148.403 | 19.47622 | 1148.403 |
| 1148.403 | 18.99156 | 1148.403 | 19.5     | 1148.403 | 19.28177 | 1148.403 | 19.48    | 1148.403 |
| 1148.403 | 19       | 1148.403 | 19.50309 | 1148.403 | 19.29    | 1148.403 | 19.48622 | 1148.403 |
| 1148.403 | 19.00156 | 1148.403 | 19.51    | 1148.403 | 19.29177 | 1148.403 | 19.49    | 1148.403 |
| 1148.403 | 19.01    | 1148.403 | 19.51309 | 1148.403 | 19.3     | 1148.403 | 19.49622 | 1148.403 |
| 1148.403 | 19.01156 | 1148.403 | 19.52    | 1148.403 | 19.30177 | 1148.403 | 19.5     | 1148.403 |
| 1148.403 | 19.02    | 1148.403 | 19.52309 | 1148.403 | 19.31    | 1148.403 | 19.50622 | 1148.403 |
| 1148.403 | 19.02156 | 1148.403 | 19.53    | 1148.403 | 19.31177 | 1148.403 | 19.51    | 1148.403 |
| 1148.403 | 19.03    | 1148.403 | 19.53309 | 1148.403 | 19.32    | 1148.403 | 19.51622 | 1148.403 |
| 1148.403 | 19.03156 | 1148.403 | 19.54    | 1148.403 | 19.32177 | 1148.403 | 19.52    | 1148.403 |
| 1148.403 | 19.04    | 1148.403 | 19.54309 | 1148.403 | 19.33    | 1148.403 | 19.52622 | 1148.403 |
| 1148.403 | 19.04156 | 1148.403 | 19.55    | 1148.403 | 19.33177 | 1148.403 | 19.53    | 1148.403 |
| 1148.403 | 19.05    | 1148.403 | 19.55309 | 1148.403 | 19.34    | 1148.403 | 19.53622 | 1148.403 |
| 1148.403 | 19.05156 | 1148.403 | 19.56    | 1148.403 | 19.34177 | 1148.403 | 19.54    | 1148.403 |
| 1148.403 | 19.06    | 1148.403 | 19.56309 | 1148.403 | 19.35    | 1148.403 | 19.54622 | 1148.403 |
| 1148.403 | 19.06156 | 1148.403 | 19.57    | 1148.403 | 19.35177 | 1148.403 | 19.55    | 1148.403 |
| 1148.403 | 19.07    | 1148.403 | 19.57309 | 1148.403 | 19.36    | 1148.403 | 19.55622 | 1148.403 |
| 1148.403 | 19.07156 | 1148.403 | 19.58    | 1148.403 | 19.36177 | 1148.403 | 19.56    | 1148.403 |
| 1148.403 | 19.08    | 1148.403 | 19.58309 | 1148.403 | 19.37    | 1148.403 | 19.56622 | 1148.403 |
| 1148.403 | 19.08156 | 1148.403 | 19.59    | 1148.403 | 19.37177 | 1148.403 | 19.57    | 1148.403 |
| 1148.403 | 19.09    | 1148.403 | 19.59309 | 1148.403 | 19.38    | 1148.403 | 19.57622 | 1148.403 |

|          |          |          |          |          |          |          |          |          |
|----------|----------|----------|----------|----------|----------|----------|----------|----------|
| 1148.403 | 19.09156 | 1148.403 | 19.6     | 1148.403 | 19.38177 | 1148.403 | 19.58    | 1148.403 |
| 1148.403 | 19.1     | 1148.403 | 19.60309 | 1148.403 | 19.39    | 1148.403 | 19.58622 | 1148.403 |
| 1148.403 | 19.10156 | 1148.403 | 19.61    | 1148.403 | 19.39177 | 1148.403 | 19.59    | 1148.403 |
| 1148.403 | 19.11    | 1148.403 | 19.61309 | 1148.403 | 19.4     | 1148.403 | 19.59622 | 1148.403 |
| 1148.403 | 19.11156 | 1148.403 | 19.62    | 1148.403 | 19.40177 | 1148.403 | 19.6     | 1148.403 |
| 1148.403 | 19.12    | 1148.403 | 19.62309 | 1148.403 | 19.41    | 1148.403 | 19.60622 | 1148.403 |
| 1148.403 | 19.12156 | 1148.403 | 19.63    | 1148.403 | 19.41177 | 1148.403 | 19.61    | 1148.403 |
| 1148.403 | 19.13    | 1148.403 | 19.63309 | 1148.403 | 19.42    | 1148.403 | 19.61622 | 1148.403 |
| 1148.403 | 19.13156 | 1148.403 | 19.64    | 1148.403 | 19.42177 | 1148.403 | 19.62    | 1148.403 |
| 1148.403 | 19.14    | 1148.403 | 19.64309 | 1148.403 | 19.43    | 1148.403 | 19.62622 | 1148.403 |
| 1148.403 | 19.14156 | 1148.403 | 19.65    | 1148.403 | 19.43177 | 1148.403 | 19.63    | 1148.403 |
| 1148.403 | 19.15    | 1148.403 | 19.65309 | 1148.403 | 19.44    | 1148.403 | 19.63622 | 1148.403 |
| 1148.403 | 19.15156 | 1148.403 | 19.65896 | 1148.403 | 19.44177 | 1148.403 | 19.64    | 1148.403 |
| 1148.403 | 19.16    | 1148.403 | 19.66    | 1148.403 | 19.45    | 1148.403 | 19.64622 | 1148.403 |
| 1148.403 | 19.16156 | 1148.403 | 19.66245 | 1148.403 | 19.45177 | 1148.403 | 19.65    | 1148.403 |
| 1148.403 | 19.17    | 1148.403 | 19.66495 | 1148.403 | 19.46    | 1148.403 | 19.65622 | 1148.403 |
| 1148.403 | 19.17156 | 1148.403 | 19.67    | 1148.403 | 19.46177 | 1148.403 | 19.66    | 1148.403 |
| 1148.403 | 19.18    | 1148.403 | 19.67199 | 1148.403 | 19.47    | 1148.403 | 19.66622 | 1148.403 |
| 1148.403 | 19.18156 | 1148.403 | 19.68    | 1148.403 | 19.47177 | 1148.403 | 19.67    | 1148.403 |
| 1148.403 | 19.19    | 1148.403 | 19.68199 | 1148.403 | 19.48    | 1148.403 | 19.67622 | 1148.403 |
| 1148.403 | 19.19156 | 1148.403 | 19.69    | 1148.403 | 19.48177 | 1148.403 | 19.68    | 1148.403 |
| 1148.403 | 19.2     | 1148.403 | 19.69199 | 1148.403 | 19.49    | 1148.403 | 19.68622 | 1148.403 |
| 1148.403 | 19.20156 | 1148.403 | 19.7     | 1148.403 | 19.49177 | 1148.403 | 19.69    | 1148.403 |
| 1148.403 | 19.21    | 1148.403 | 19.70199 | 1148.403 | 19.5     | 1148.403 | 19.69622 | 1148.403 |
| 1148.403 | 19.21156 | 1148.403 | 19.71    | 1148.403 | 19.50177 | 1148.403 | 19.7     | 1148.403 |
| 1148.403 | 19.22    | 1148.403 | 19.71199 | 1148.403 | 19.51    | 1148.403 | 19.70622 | 1148.403 |
| 1148.403 | 19.22156 | 1148.403 | 19.72    | 1148.403 | 19.51177 | 1148.403 | 19.71    | 1148.403 |
| 1148.403 | 19.23    | 1148.403 | 19.72199 | 1148.403 | 19.52    | 1148.403 | 19.71622 | 1148.403 |
| 1148.403 | 19.23156 | 1148.403 | 19.73    | 1148.403 | 19.52177 | 1148.403 | 19.72    | 1148.403 |
| 1148.403 | 19.24    | 1148.403 | 19.73199 | 1148.403 | 19.53    | 1148.403 | 19.72622 | 1148.403 |
| 1148.403 | 19.24156 | 1148.403 | 19.74    | 1148.403 | 19.53177 | 1148.403 | 19.73    | 1148.403 |
| 1148.403 | 19.25    | 1148.403 | 19.74199 | 1148.403 | 19.54    | 1148.403 | 19.73622 | 1148.403 |
| 1148.403 | 19.25156 | 1148.403 | 19.75    | 1148.403 | 19.54177 | 1148.403 | 19.74    | 1148.403 |
| 1148.403 | 19.26    | 1148.403 | 19.75199 | 1148.403 | 19.55    | 1148.403 | 19.74622 | 1148.403 |
| 1148.403 | 19.26156 | 1148.403 | 19.76    | 1148.403 | 19.55177 | 1148.403 | 19.75    | 1148.403 |
| 1148.403 | 19.27    | 1148.403 | 19.76199 | 1148.403 | 19.56    | 1148.403 | 19.75622 | 1148.403 |
| 1148.403 | 19.27156 | 1148.403 | 19.77    | 1148.403 | 19.56177 | 1148.403 | 19.76    | 1148.403 |
| 1148.403 | 19.28    | 1148.403 | 19.77199 | 1148.403 | 19.57    | 1148.403 | 19.76622 | 1148.403 |
| 1148.403 | 19.28156 | 1148.403 | 19.78    | 1148.403 | 19.57177 | 1148.403 | 19.77    | 1148.403 |
| 1148.403 | 19.29    | 1148.403 | 19.78199 | 1148.403 | 19.58    | 1148.403 | 19.77622 | 1148.403 |
| 1148.403 | 19.29156 | 1148.403 | 19.79    | 1148.403 | 19.58177 | 1148.403 | 19.78    | 1148.403 |
| 1148.403 | 19.3     | 1148.403 | 19.79199 | 1148.403 | 19.59    | 1148.403 | 19.78622 | 1148.403 |
| 1148.403 | 19.30156 | 1148.403 | 19.8     | 1148.403 | 19.59177 | 1148.403 | 19.79    | 1148.403 |
| 1148.403 | 19.31    | 1148.403 | 19.80199 | 1148.403 | 19.6     | 1148.403 | 19.79622 | 1148.403 |
| 1148.403 | 19.31156 | 1148.403 | 19.81    | 1148.403 | 19.60177 | 1148.403 | 19.8     | 1148.403 |
| 1148.403 | 19.32    | 1148.403 | 19.81199 | 1148.403 | 19.61    | 1148.403 | 19.80622 | 1148.403 |
| 1148.403 | 19.32156 | 1148.403 | 19.82    | 1148.403 | 19.61177 | 1148.403 | 19.81    | 1148.403 |

|          |          |          |          |          |          |          |          |          |
|----------|----------|----------|----------|----------|----------|----------|----------|----------|
| 1148.403 | 19.33    | 1148.403 | 19.82199 | 1148.403 | 19.62    | 1148.403 | 19.81622 | 1148.403 |
| 1148.403 | 19.33156 | 1148.403 | 19.83    | 1148.403 | 19.62177 | 1148.403 | 19.82    | 1148.403 |
| 1148.403 | 19.34    | 1148.403 | 19.83199 | 1148.403 | 19.63    | 1148.403 | 19.82622 | 1148.403 |
| 1148.403 | 19.34156 | 1148.403 | 19.84    | 1148.403 | 19.63177 | 1148.403 | 19.83    | 1148.403 |
| 1148.403 | 19.35    | 1148.403 | 19.84199 | 1148.403 | 19.64    | 1148.403 | 19.83622 | 1148.403 |
| 1148.403 | 19.35156 | 1148.403 | 19.85    | 1148.403 | 19.64177 | 1148.403 | 19.84    | 1148.403 |
| 1148.403 | 19.36    | 1148.403 | 19.85199 | 1148.403 | 19.65    | 1148.403 | 19.84622 | 1148.403 |
| 1148.403 | 19.36156 | 1148.403 | 19.86    | 1148.403 | 19.65177 | 1148.403 | 19.85    | 1148.403 |
| 1148.403 | 19.37    | 1148.403 | 19.86199 | 1148.403 | 19.66    | 1148.403 | 19.85622 | 1148.403 |
| 1148.403 | 19.37156 | 1148.403 | 19.87    | 1148.403 | 19.66177 | 1148.403 | 19.86    | 1148.403 |
| 1148.403 | 19.38    | 1148.403 | 19.87199 | 1148.403 | 19.66347 | 1148.403 | 19.86622 | 1148.403 |
| 1148.403 | 19.38156 | 1148.403 | 19.88    | 1148.403 | 19.67    | 1148.403 | 19.87    | 1148.403 |
| 1148.403 | 19.39    | 1148.403 | 19.88199 | 1148.403 | 19.67147 | 1148.403 | 19.87622 | 1148.403 |
| 1148.403 | 19.39156 | 1148.403 | 19.89    | 1148.403 | 19.67392 | 1148.403 | 19.88    | 1148.403 |
| 1148.403 | 19.4     | 1148.403 | 19.89199 | 1148.403 | 19.68    | 1148.403 | 19.88622 | 1148.403 |
| 1148.403 | 19.40156 | 1148.403 | 19.9     | 1148.403 | 19.68236 | 1148.403 | 19.89    | 1148.403 |
| 1148.403 | 19.41    | 1148.403 | 19.90199 | 1148.403 | 19.69    | 1148.403 | 19.89622 | 1148.403 |
| 1148.403 | 19.41156 | 1148.403 | 19.91    | 1148.403 | 19.69236 | 1148.403 | 19.9     | 1148.403 |
| 1148.403 | 19.42    | 1148.403 | 19.91199 | 1148.403 | 19.7     | 1148.403 | 19.90622 | 1148.403 |
| 1148.403 | 19.42156 | 1148.403 | 19.92    | 1148.403 | 19.70236 | 1148.403 | 19.91    | 1148.403 |
| 1148.403 | 19.43    | 1148.403 | 19.92199 | 1148.403 | 19.71    | 1148.403 | 19.91622 | 1148.403 |
| 1148.403 | 19.43156 | 1148.403 | 19.93    | 1148.403 | 19.71236 | 1148.403 | 19.92    | 1148.403 |
| 1148.403 | 19.44    | 1148.403 | 19.93199 | 1148.403 | 19.72    | 1148.403 | 19.92622 | 1148.403 |
| 1148.403 | 19.44156 | 1148.403 | 19.94    | 1148.403 | 19.72236 | 1148.403 | 19.93    | 1148.403 |
| 1148.403 | 19.45    | 1148.403 | 19.94199 | 1148.403 | 19.73    | 1148.403 | 19.93622 | 1148.403 |
| 1148.403 | 19.45156 | 1148.403 | 19.95    | 1148.403 | 19.73236 | 1148.403 | 19.94    | 1148.403 |
| 1148.403 | 19.46    | 1148.403 | 19.95199 | 1148.403 | 19.74    | 1148.403 | 19.94622 | 1148.403 |
| 1148.403 | 19.46156 | 1148.403 | 19.96    | 1148.403 | 19.74236 | 1148.403 | 19.95    | 1148.403 |
| 1148.403 | 19.47    | 1148.403 | 19.96199 | 1148.403 | 19.75    | 1148.403 | 19.95622 | 1148.403 |
| 1148.403 | 19.47156 | 1148.403 | 19.97    | 1148.403 | 19.75236 | 1148.403 | 19.96    | 1148.403 |
| 1148.403 | 19.48    | 1148.403 | 19.97199 | 1148.403 | 19.76    | 1148.403 | 19.96622 | 1148.403 |
| 1148.403 | 19.48156 | 1148.403 | 19.98    | 1148.403 | 19.76236 | 1148.403 | 19.97    | 1148.403 |
| 1148.403 | 19.49    | 1148.403 | 19.98199 | 1148.403 | 19.77    | 1148.403 | 19.97622 | 1148.403 |
| 1148.403 | 19.49156 | 1148.403 | 19.99    | 1148.403 | 19.77236 | 1148.403 | 19.98    | 1148.403 |
| 1148.403 | 19.5     | 1148.403 | 19.99199 | 1148.403 | 19.78    | 1148.403 | 19.98622 | 1148.403 |
| 1148.403 | 19.50156 | 1148.403 | 20       | 1148.403 | 19.78236 | 1148.403 | 19.99    | 1148.403 |
| 1148.403 | 19.51    | 1148.403 |          |          | 19.79    | 1148.403 | 19.99622 | 1148.403 |
| 1148.403 | 19.51156 | 1148.403 |          |          | 19.79236 | 1148.403 | 20       | 1148.403 |
| 1148.403 | 19.52    | 1148.403 |          |          | 19.8     | 1148.403 |          |          |
| 1148.403 | 19.52156 | 1148.403 |          |          | 19.80236 | 1148.403 |          |          |
| 1148.403 | 19.53    | 1148.403 |          |          | 19.81    | 1148.403 |          |          |
| 1148.403 | 19.53156 | 1148.403 |          |          | 19.81236 | 1148.403 |          |          |
| 1148.403 | 19.54    | 1148.403 |          |          | 19.82    | 1148.403 |          |          |
| 1148.403 | 19.54156 | 1148.403 |          |          | 19.82236 | 1148.403 |          |          |
| 1148.403 | 19.55    | 1148.403 |          |          | 19.83    | 1148.403 |          |          |
| 1148.403 | 19.55156 | 1148.403 |          |          | 19.83236 | 1148.403 |          |          |
| 1148.403 | 19.56    | 1148.403 |          |          | 19.84    | 1148.403 |          |          |

|          |          |          |
|----------|----------|----------|
| 1148.403 | 19.56156 | 1148.403 |
| 1148.403 | 19.57    | 1148.403 |
| 1148.403 | 19.57156 | 1148.403 |
| 1148.403 | 19.58    | 1148.403 |
| 1148.403 | 19.58156 | 1148.403 |
| 1148.403 | 19.59    | 1148.403 |
| 1148.403 | 19.59156 | 1148.403 |
| 1148.403 | 19.59278 | 1148.403 |
| 1148.403 | 19.59917 | 1148.403 |
| 1148.403 | 19.60091 | 1148.403 |
| 1148.403 | 19.60509 | 1148.403 |
| 1148.403 | 19.60614 | 1148.403 |
| 1148.403 | 19.61    | 1148.403 |
| 1148.403 | 19.61104 | 1148.403 |
| 1148.403 | 19.61445 | 1148.403 |
| 1148.403 | 19.62    | 1148.403 |
| 1148.403 | 19.62241 | 1148.403 |
| 1148.403 | 19.63    | 1148.403 |
| 1148.403 | 19.63228 | 1148.403 |
| 1148.403 | 19.64    | 1148.403 |
| 1148.403 | 19.64228 | 1148.403 |
| 1148.403 | 19.65    | 1148.403 |
| 1148.403 | 19.65228 | 1148.403 |
| 1148.403 | 19.65795 | 1148.403 |
| 1148.403 | 19.66    | 1148.403 |
| 1148.403 | 19.66278 | 1148.403 |
| 1148.403 | 19.66571 | 1148.403 |
| 1148.403 | 19.67    | 1148.403 |
| 1148.403 | 19.6724  | 1148.403 |
| 1148.403 | 19.68    | 1148.403 |
| 1148.403 | 19.6824  | 1148.403 |
| 1148.403 | 19.69    | 1148.403 |
| 1148.403 | 19.6924  | 1148.403 |
| 1148.403 | 19.7     | 1148.403 |
| 1148.403 | 19.7024  | 1148.403 |
| 1148.403 | 19.71    | 1148.403 |
| 1148.403 | 19.7124  | 1148.403 |
| 1148.403 | 19.72    | 1148.403 |
| 1148.403 | 19.7224  | 1148.403 |
|          | 19.73    | 1148.403 |
|          | 19.7324  | 1148.403 |
|          | 19.74    | 1148.403 |
|          | 19.7424  | 1148.403 |
|          | 19.75    | 1148.403 |
|          | 19.7524  | 1148.403 |
|          | 19.76    | 1148.403 |
|          | 19.7624  | 1148.403 |

|          |          |
|----------|----------|
| 19.84236 | 1148.403 |
| 19.85    | 1148.403 |
| 19.85236 | 1148.403 |
| 19.86    | 1148.403 |
| 19.86236 | 1148.403 |
| 19.87    | 1148.403 |
| 19.87236 | 1148.403 |
| 19.88    | 1148.403 |
| 19.88236 | 1148.403 |
| 19.89    | 1148.403 |
| 19.89236 | 1148.403 |
| 19.9     | 1148.403 |
| 19.90236 | 1148.403 |
| 19.91    | 1148.403 |
| 19.91236 | 1148.403 |
| 19.91384 | 1148.403 |
| 19.91843 | 1148.403 |
| 19.92    | 1148.403 |
| 19.9223  | 1148.403 |
| 19.92457 | 1148.403 |
| 19.93    | 1148.403 |
| 19.93187 | 1148.403 |
| 19.94    | 1148.403 |
| 19.94187 | 1148.403 |
| 19.95    | 1148.403 |
| 19.95187 | 1148.403 |
| 19.96    | 1148.403 |
| 19.96187 | 1148.403 |
| 19.97    | 1148.403 |
| 19.97187 | 1148.403 |
| 19.98    | 1148.403 |
| 19.98187 | 1148.403 |
| 19.99    | 1148.403 |
| 19.99187 | 1148.403 |
| 20       | 1148.403 |

|         |          |
|---------|----------|
| 19.77   | 1148.403 |
| 19.7724 | 1148.403 |
| 19.78   | 1148.403 |
| 19.7824 | 1148.403 |
| 19.79   | 1148.403 |
| 19.7924 | 1148.403 |
| 19.8    | 1148.403 |
| 19.8024 | 1148.403 |
| 19.81   | 1148.403 |
| 19.8124 | 1148.403 |
| 19.82   | 1148.403 |
| 19.8224 | 1148.403 |
| 19.83   | 1148.403 |
| 19.8324 | 1148.403 |
| 19.84   | 1148.403 |
| 19.8424 | 1148.403 |
| 19.85   | 1148.403 |
| 19.8524 | 1148.403 |
| 19.86   | 1148.403 |
| 19.8624 | 1148.403 |
| 19.87   | 1148.403 |
| 19.8724 | 1148.403 |
| 19.88   | 1148.403 |
| 19.8824 | 1148.403 |
| 19.89   | 1148.403 |
| 19.8924 | 1148.403 |
| 19.9    | 1148.403 |
| 19.9024 | 1148.403 |
| 19.91   | 1148.403 |
| 19.9124 | 1148.403 |
| 19.92   | 1148.403 |
| 19.9224 | 1148.403 |
| 19.93   | 1148.403 |
| 19.9324 | 1148.403 |
| 19.94   | 1148.403 |
| 19.9424 | 1148.403 |
| 19.95   | 1148.403 |
| 19.9524 | 1148.403 |
| 19.96   | 1148.403 |
| 19.9624 | 1148.403 |
| 19.97   | 1148.403 |
| 19.9724 | 1148.403 |
| 19.98   | 1148.403 |
| 19.9824 | 1148.403 |
| 19.99   | 1148.403 |
| 19.9924 | 1148.403 |
| 20      | 1148.403 |
